# Supplementary material for: Genomic disparities between cancers in adolescent and young adults and in older adults
Source: Nat Commun. 2022 Nov 24;13:7223. doi: 10.1038/s41467-022-34959-2 (PMC9700745; doi:10.1038/s41467-022-34959-2)
Supplement: Supplementary file 4 — Supplementary Data 1 [file 41467_2022_34959_MOESM4_ESM.xlsx]

## Sheet: Sex
	AYA		OA		AYA Percentage		OA Percentage
	Female	Male	Female	Male	Female	Male	Female	Male	FDR
Thyroid Cancer	168	76	655	677	0.69	0.31	0.49	0.51	2.193e-07
Renal Cell Carcinoma	78	85	442	1205	0.48	0.52	0.27	0.73	4.9895e-07
Melanoma	207	189	1565	2502	0.52	0.48	0.38	0.62	6.85667e-07
Head and Neck Cancer	46	65	387	1173	0.41	0.59	0.25	0.75	0.00121125
Esophagogastric Cancer	71	109	798	2085	0.39	0.61	0.28	0.72	0.003842
Colorectal Cancer	473	492	4489	5537	0.49	0.51	0.45	0.55	0.0345667
Leukemia	113	124	803	1127	0.48	0.52	0.42	0.58	0.153944
Hepatobiliary Cancer	82	69	943	1080	0.54	0.46	0.47	0.53	0.153944
Pancreatic Cancer	70	59	1966	2298	0.54	0.46	0.46	0.54	0.153944
Bone Cancer	99	180	130	179	0.35	0.65	0.42	0.58	0.1836
Breast Cancer	1242	5	11361	89	1	0	0.99	0.01	0.23375
Germ Cell Tumor	65	443	25	244	0.13	0.87	0.09	0.91	0.23375
Cancer of Unknown Primary	104	118	1506	1443	0.47	0.53	0.51	0.49	0.309923
Soft Tissue Sarcoma	318	322	1131	1037	0.5	0.5	0.52	0.48	0.34
CNS Cancer	61	42	239	148	0.59	0.41	0.62	0.38	0.736667
Glioma	568	804	1832	2536	0.41	0.59	0.42	0.58	0.775625
Non-Small Cell Lung Cancer	146	108	9313	7044	0.57	0.43	0.57	0.43	0.898
Ovarian Cancer	224	NA	3997	NA	1	NA	1	NA	NA
Cervical Cancer	153	NA	501	3	1	NA	0.99	0.01	NA

## Sheet: Metastatic status
	AYA_Primary	OA_Primary	AYA_Metastasis	OA_Metastasis	AYA_Primary_ratio	OA_Primary_ratio	AYA_Metastasis_ratio	OA_Metastasis_ratio	p-value	FDR
Cancer of Unknown Primary	63	415	123	2044	0.282511	0.140726	0.55157	0.693116	9.09e-08	1.7271e-06
Non-Small Cell Lung Cancer	120	9722	124	6109	0.472441	0.594327	0.488189	0.373456	0.00015	0.001425
Thyroid Cancer	155	714	73	573	0.635246	0.536036	0.29918	0.43018	0.00047	0.00297667
Breast Cancer	791	6728	438	4519	0.634322	0.587598	0.351243	0.394672	0.00213	0.008094
Renal Cell Carcinoma	118	1021	36	570	0.723926	0.619915	0.220859	0.346084	0.00185	0.008094
Ovarian Cancer	124	1744	89	1875	0.553571	0.436327	0.397321	0.469102	0.00473	0.0149783
Germ Cell Tumor	303	134	196	132	0.596457	0.498141	0.385827	0.490706	0.00721	0.01957
Pancreatic Cancer	58	2414	65	1682	0.449612	0.566135	0.503876	0.394465	0.0118	0.028025
Cervical Cancer	107	300	41	183	0.699346	0.595238	0.267974	0.363095	0.0242	0.0510889
Hepatobiliary Cancer	86	1313	62	651	0.569536	0.649036	0.410596	0.321799	0.0378	0.07182
Colorectal Cancer	644	6428	297	3344	0.667358	0.641133	0.307772	0.333533	0.105	0.181364
Glioma	973	3350	119	348	0.709184	0.766941	0.0867347	0.0796703	0.147	0.217143
Esophagogastric Cancer	121	2038	55	729	0.672222	0.706903	0.305556	0.252862	0.16	0.217143
CNS Cancer	64	296	15	43	0.621359	0.764858	0.145631	0.111111	0.15	0.217143
Soft Tissue Sarcoma	384	1276	217	798	0.6	0.588561	0.339062	0.368081	0.294	0.3724
Head and Neck Cancer	66	862	40	606	0.594595	0.552564	0.36036	0.388462	0.54	0.64125
Melanoma	134	1321	238	2490	0.338384	0.324809	0.60101	0.612245	0.608	0.641778
Bone Cancer	152	164	111	132	0.544803	0.530744	0.397849	0.427184	0.608	0.641778
Leukemia	51	350	1	11	0.21519	0.181347	0.00421941	0.00569948	1	1
Noted that the primary ratio and metastasis ratio are not adding to 1 because some samples with 'Unknown' or 'NA' status.

## Sheet: Race Ethnicity
	Sample Counts								Sample Percentages								P values				FDR				Likelihood Ratio
	AYA_Asian_nonH	OA_Asian_nonH	AYA_Black_nonH	OA_Black_nonH	AYA_White_nonH	OA_White_nonH	AYA_Hispanic	OA_Hispanic	AYA_Asian_r	OA_Asian_r	AYA_Black_r	OA_Black_r	AYA_White_r	OA_White_r	AYA_Hispanic_r	OA_Hispanic_r	p-Asian	p-Black	p-White	p-Hispanic	FDR_Asian	FDR_Black	FDR_White	FDR_Hispanic	LR_asian	LR_black	LR_white	LR_hispanic
Leukemia	16	42	22	111	97	908	16	24	0.0675105	0.0217617	0.092827	0.057513	0.409283	0.470466	0.0675105	0.0124352	0.000295	0.0432	0.0843	1.44e-06	0.00140125	0.17594	0.10678	1.368e-05	3.10227	1.61402	0.869951	5.42897
Renal Cell Carcinoma	10	33	22	61	81	1153	12	99	0.0613497	0.0200364	0.134969	0.037037	0.496933	0.700061	0.0736196	0.0601093	0.00371	1.41e-06	3.59e-07	0.492	0.0117483	2.679e-05	1.13683e-06	0.64125	3.06191	3.64417	0.709842	1.22476
Bone Cancer	23	10	15	9	144	215	32	26	0.0824373	0.0323625	0.0537634	0.0291262	0.516129	0.695793	0.114695	0.0841424	0.0112	0.148	1.01e-05	0.268	0.0304	0.3515	2.13222e-05	0.424333	2.54731	1.84588	0.741785	1.36311
Melanoma	8	34	2	41	252	2815	14	139	0.020202	0.00835997	0.00505051	0.0100811	0.636364	0.692156	0.0353535	0.0341775	0.0288	0.585	0.0232	0.885	0.05472	0.855	0.0339077	0.934167	2.41652	0.500985	0.919393	1.03441
Thyroid Cancer	29	71	10	49	153	854	22	75	0.118852	0.0533033	0.0409836	0.0367868	0.627049	0.641141	0.0901639	0.0563063	0.000475	0.715	0.717	0.058	0.001805	0.970357	0.717	0.1102	2.22974	1.11408	0.978021	1.60131
Non-Small Cell Lung Cancer	34	983	21	861	114	10587	17	552	0.133858	0.0600929	0.0826772	0.0526348	0.448819	0.647206	0.0669291	0.033745	1.59e-05	0.0463	2.02e-10	0.00807	0.00015105	0.17594	1.27933e-09	0.0191662	2.22752	1.57077	0.693471	1.98338
Breast Cancer	95	408	68	620	605	5859	80	654	0.0761828	0.0356332	0.0545309	0.0541485	0.485164	0.511703	0.064154	0.0571179	3e-10	0.947	0.0784	0.307	5.7e-09	1	0.1064	0.448692	2.13797	1.00706	0.948137	1.12318
Esophagogastric Cancer	18	153	3	108	82	1940	35	199	0.1	0.0530697	0.0166667	0.037461	0.455556	0.67291	0.194444	0.0690253	0.0174	0.213	8.25e-09	9.41e-08	0.041325	0.367909	3.135e-08	1.7879e-06	1.88431	0.444907	0.676993	2.817
Pancreatic Cancer	9	160	4	175	64	3017	22	354	0.0697674	0.0375235	0.0310078	0.0410413	0.496124	0.707552	0.170543	0.0830206	0.0962	0.82	7.38e-07	0.00192	0.1406	1	2.00314e-06	0.00521143	1.8593	0.755526	0.701184	2.05422
Glioma	81	148	45	108	856	3273	91	183	0.0590379	0.0338828	0.0327988	0.0247253	0.623907	0.749313	0.0663265	0.0418956	6.95e-05	0.124	8.85e-19	0.000356	0.000440167	0.336571	1.6815e-17	0.0013528	1.74242	1.32653	0.832638	1.58314
Ovarian Cancer	17	188	3	116	105	2304	14	212	0.0758929	0.0470353	0.0133929	0.0290218	0.46875	0.576432	0.0625	0.0530398	0.0554	0.213	0.00176	0.54	0.0877167	0.367909	0.003344	0.64125	1.61353	0.461476	0.813192	1.17836
Soft Tissue Sarcoma	44	101	50	85	351	1491	63	113	0.06875	0.0465867	0.078125	0.0392066	0.548438	0.687731	0.0984375	0.0521218	0.0323	0.000131	1.41e-10	5.64e-05	0.0557909	0.0012445	1.27933e-09	0.0003572	1.47574	1.99265	0.79746	1.88861
Head and Neck Cancer	8	79	6	37	45	986	9	129	0.0720721	0.050641	0.0540541	0.0237179	0.405405	0.632051	0.0810811	0.0826923	0.371	0.0609	3.99e-06	1	0.5035	0.19285	9.47625e-06	1	1.4232	2.27904	0.641412	0.980515
Colorectal Cancer	56	416	53	564	549	5796	85	689	0.0580311	0.0414921	0.0549223	0.0562537	0.568912	0.578097	0.0880829	0.0687213	0.0196	0.942	0.585	0.0295	0.0413778	1	0.6175	0.0622778	1.39861	0.976331	0.984112	1.28174
Cervical Cancer	10	25	2	27	72	220	16	44	0.0653595	0.0496032	0.0130719	0.0535714	0.470588	0.436508	0.104575	0.0873016	0.418	0.0402	0.459	0.523	0.529467	0.17594	0.513	0.64125	1.31765	0.244009	1.07807	1.19786
CNS Cancer	6	18	5	9	67	303	8	16	0.0582524	0.0465116	0.0485437	0.0232558	0.650485	0.782946	0.0776699	0.0413437	0.61	0.185	0.00682	0.13	0.681765	0.367909	0.01178	0.224545	1.25243	2.08738	0.830818	1.87864
Germ Cell Tumor	18	11	7	6	306	186	69	16	0.0354331	0.0408922	0.0137795	0.0223048	0.602362	0.69145	0.135827	0.0594796	0.695	0.389	0.0153	0.00102	0.729	0.615917	0.024225	0.00323	0.8665	0.617782	0.871158	2.28359
Hepatobiliary Cancer	8	129	6	89	82	1225	8	136	0.0529801	0.0637667	0.0397351	0.0439941	0.543046	0.605536	0.0529801	0.0672269	0.729	1	0.143	0.612	0.729	1	0.169813	0.684	0.830843	0.903192	0.896802	0.788079
Cancer of Unknown Primary	7	125	11	155	101	1955	24	125	0.0313901	0.0423872	0.0493274	0.0525602	0.452915	0.662937	0.107623	0.0423872	0.6	1	6.56e-10	9.13e-05	0.681765	1	3.116e-09	0.000433675	0.740556	0.938493	0.683195	2.53905

## Sheet: Histology
CANCER_TYPE	CANCER_TYPE_DETAILED	AYA_count	AYA_others	OA_count	OA_others	AYA_ratio	OA_ratio	p	FDR	Likelihood Ratio
Bone Cancer	Chondroblastoma	NA	NA	2	307	NA	0.00647249	NA	NA	#VALUE!
Bone Cancer	Adamantinoma	NA	NA	1	308	NA	0.00323625	NA	NA	#VALUE!
Bone Cancer	Dedifferentiated Chordoma	NA	NA	1	308	NA	0.00323625	NA	NA	#VALUE!
Bone Cancer	Parosteal Osteosarcoma	2	277	NA	NA	0.00716846	NA	NA	NA	#VALUE!
Bone Cancer	Periosteal Osteosarcoma	1	278	NA	NA	0.00358423	NA	NA	NA	#VALUE!
Bone Cancer	Telangiectatic Osteosarcoma	1	278	NA	NA	0.00358423	NA	NA	NA	#VALUE!
Bone Cancer	Ewing Sarcoma	103	176	38	271	0.369176	0.122977	2.77e-12	3.75335e-11	3.00198
Bone Cancer	High-Grade Surface Osteosarcoma	2	277	1	308	0.00716846	0.00323625	0.606	0.739757	2.21505
Bone Cancer	Mesenchymal Chondrosarcoma	7	272	4	305	0.0250896	0.012945	0.365	0.534676	1.93817
Bone Cancer	Osteosarcoma	99	180	65	244	0.354839	0.210356	0.000107	0.000527218	1.68685
Bone Cancer	Giant Cell Tumor of Bone	6	273	4	305	0.0215054	0.012945	0.529	0.673047	1.66129
Bone Cancer	Chondroblastic Osteosarcoma	5	274	4	305	0.0179211	0.012945	0.742	0.855668	1.38441
Bone Cancer	Osteoblastic Osteosarcoma	9	270	9	300	0.0322581	0.0291262	1	1	1.10753
Bone Cancer	Small Cell Osteosarcoma	1	278	1	308	0.00358423	0.00323625	1	1	1.10753
Bone Cancer	Myxoid Chondrosarcoma	3	276	7	302	0.0107527	0.0226537	0.346	0.515198	0.474654
Bone Cancer	Chondrosarcoma	25	254	85	224	0.0896057	0.275081	5.99e-09	5.79746e-08	0.325743
Bone Cancer	Chordoma	12	267	55	254	0.0430108	0.177994	1.89e-07	1.50644e-06	0.241642
Bone Cancer	Conventional Type Chordoma	1	278	5	304	0.00358423	0.0161812	0.22	0.370311	0.221505
Bone Cancer	Extraskeletal Myxoid Chondrosarcoma	1	278	11	298	0.00358423	0.0355987	0.0066	0.0194413	0.100684
Bone Cancer	Dedifferentiated Chondrosarcoma	1	278	16	293	0.00358423	0.0517799	0.000297	0.00134145	0.0692204
Breast Cancer	Adenoid Cystic Breast Cancer	NA	NA	17	11433	NA	0.00148472	NA	NA	#VALUE!
Breast Cancer	Solid Papillary Carcinoma of the Breast	NA	NA	10	11440	NA	0.000873362	NA	NA	#VALUE!
Breast Cancer	Breast Lobular Carcinoma In Situ	NA	NA	8	11442	NA	0.00069869	NA	NA	#VALUE!
Breast Cancer	Adenomyoepithelioma of the Breast	NA	NA	4	11446	NA	0.000349345	NA	NA	#VALUE!
Breast Cancer	Breast Carcinoma with Signet Ring	NA	NA	3	11447	NA	0.000262009	NA	NA	#VALUE!
Breast Cancer	Paget Disease of the Nipple	NA	NA	3	11447	NA	0.000262009	NA	NA	#VALUE!
Breast Cancer	Carcinoma with Chondroid Metaplasia	NA	NA	2	11448	NA	0.000174672	NA	NA	#VALUE!
Breast Cancer	Epithelial Type Metaplastic Breast Cancer	NA	NA	2	11448	NA	0.000174672	NA	NA	#VALUE!
Breast Cancer	Metaplastic Adenosquamous Carcinoma	NA	NA	2	11448	NA	0.000174672	NA	NA	#VALUE!
Breast Cancer	Carcinoma with Osseous Metaplasia	NA	NA	1	11449	NA	8.73362e-05	NA	NA	#VALUE!
Breast Cancer	Juvenile Secretory Carcinoma of the Breast	1	1246	NA	NA	0.000801925	NA	NA	NA	#VALUE!
Breast Cancer	Metaplastic Carcinosarcoma	1	1246	NA	NA	0.000801925	NA	NA	NA	#VALUE!
Breast Cancer	Mixed Type Metaplastic Breast Cancer	2	1245	4	11446	0.00160385	0.000349345	0.111	0.219569	4.59102
Breast Cancer	Breast Invasive Carcinosarcoma, NOS	1	1246	3	11447	0.000801925	0.000262009	0.339	0.507564	3.06068
Breast Cancer	Metaplastic Squamous Cell Carcinoma	1	1246	5	11445	0.000801925	0.000436681	0.462	0.629156	1.83641
Breast Cancer	Breast Invasive Mixed Mucinous Carcinoma	9	1238	46	11404	0.00721732	0.00401747	0.11	0.219569	1.79649
Breast Cancer	Breast Invasive Ductal Carcinoma	931	316	7164	4286	0.746592	0.625677	6.27e-18	1.69917e-16	1.19325
Breast Cancer	Breast Invasive Cancer, NOS	31	1216	243	11207	0.0248597	0.0212227	0.411	0.586216	1.17137
Breast Cancer	Breast Invasive Carcinoma, NOS	47	1200	370	11080	0.0376905	0.0323144	0.315	0.482288	1.16637
Breast Cancer	Metaplastic Breast Cancer	8	1239	64	11386	0.0064154	0.00558952	0.69	0.814173	1.14775
Breast Cancer	Invasive Breast Carcinoma	157	1090	1660	9790	0.125902	0.144978	0.0736	0.162159	0.868422
Breast Cancer	Breast Ductal Carcinoma In Situ	6	1241	71	11379	0.00481155	0.00620087	0.701	0.815326	0.775947
Breast Cancer	Inflammatory Breast Cancer	1	1246	14	11436	0.000801925	0.00122271	1	1	0.65586
Breast Cancer	Breast Mixed Ductal and Lobular Carcinoma	30	1217	550	10900	0.0240577	0.0480349	4.28e-05	0.000241642	0.500838
Breast Cancer	Breast Neoplasm, NOS	2	1245	38	11412	0.00160385	0.00331878	0.428	0.600974	0.483265
Breast Cancer	Breast Invasive Lobular Carcinoma	19	1228	1166	10284	0.0152366	0.101834	1.28e-32	6.9376e-31	0.149622
Cancer of Unknown Primary	Mixed Cancer Types	2	221	7	2942	0.00896861	0.00237369	0.128	0.247771	3.77835
Cancer of Unknown Primary	Undifferentiated Malignant Neoplasm	16	207	98	2851	0.0717489	0.0332316	0.00743	0.0214205	2.15906
Cancer of Unknown Primary	Neuroendocrine Carcinoma, NOS	29	194	212	2737	0.130045	0.0718888	0.00352	0.011924	1.80897
Cancer of Unknown Primary	Acinar Cell Carcinoma, NOS	1	222	8	2941	0.0044843	0.00271278	0.482	0.645927	1.65303
Cancer of Unknown Primary	Neuroendocrine Tumor, NOS	20	203	208	2741	0.0896861	0.0705324	0.282	0.441746	1.27156
Cancer of Unknown Primary	Cancer of Unknown Primary	73	150	797	2152	0.327354	0.270261	0.0732	0.162159	1.21125
Cancer of Unknown Primary	Poorly Differentiated Carcinoma, NOS	19	204	298	2651	0.0852018	0.101051	0.562	0.698633	0.843155
Cancer of Unknown Primary	Cancer of Unknown Primary, NOS	12	211	195	2754	0.0538117	0.0661241	0.574	0.707064	0.813798
Cancer of Unknown Primary	Adenocarcinoma, NOS	44	179	838	2111	0.197309	0.284164	0.00515	0.0164194	0.69435
Cancer of Unknown Primary	Small Cell Carcinoma of Unknown Primary	2	221	58	2891	0.00896861	0.0196677	0.438	0.608708	0.456007
Cancer of Unknown Primary	Squamous Cell Carcinoma, NOS	5	218	230	2719	0.0224215	0.0779925	0.000828	0.00334907	0.287483
Cervical Cancer	Cervical Serous Carcinoma	NA	NA	22	482	NA	0.0436508	NA	NA	#VALUE!
Cervical Cancer	Cervical Endometrioid Carcinoma	NA	NA	16	488	NA	0.031746	NA	NA	#VALUE!
Cervical Cancer	Signet Ring Mucinous Carcinoma	NA	NA	3	501	NA	0.00595238	NA	NA	#VALUE!
Cervical Cancer	Cervical Adenocarcinoma In Situ	NA	NA	2	502	NA	0.00396825	NA	NA	#VALUE!
Cervical Cancer	Cervical Adenoid Cystic Carcinoma	NA	NA	1	503	NA	0.00198413	NA	NA	#VALUE!
Cervical Cancer	Villoglandular Adenocarcinoma of the Cervix	NA	NA	1	503	NA	0.00198413	NA	NA	#VALUE!
Cervical Cancer	Cervical Rhabdomyosarcoma	2	151	NA	NA	0.0130719	NA	NA	NA	#VALUE!
Cervical Cancer	Glassy Cell Carcinoma of the Cervix	2	151	NA	NA	0.0130719	NA	NA	NA	#VALUE!
Cervical Cancer	Cervical Neuroendocrine Tumor	9	144	6	498	0.0588235	0.0119048	0.00221	0.00813	4.94118
Cervical Cancer	Small Cell Carcinoma of the Cervix	8	145	6	498	0.0522876	0.0119048	0.00601	0.0183001	4.39216
Cervical Cancer	Mesonephric Carcinoma	4	149	4	500	0.0261438	0.00793651	0.0902	0.192474	3.29412
Cervical Cancer	Cervical Adenosquamous Carcinoma	10	143	28	476	0.0653595	0.0555556	0.693	0.814173	1.17647
Cervical Cancer	Endocervical Adenocarcinoma	36	117	102	402	0.235294	0.202381	0.428	0.600974	1.16263
Cervical Cancer	Intestinal Type Mucinous Carcinoma	1	152	3	501	0.00653595	0.00595238	1	1	1.09804
Cervical Cancer	Cervical Clear Cell Carcinoma	3	150	9	495	0.0196078	0.0178571	1	1	1.09804
Cervical Cancer	Cervical Squamous Cell Carcinoma	61	92	200	304	0.398693	0.396825	1	1	1.00471
Cervical Cancer	Mucinous Carcinoma	3	150	13	491	0.0196078	0.0257937	1	1	0.760181
Cervical Cancer	Cervical Adenocarcinoma	10	143	44	460	0.0653595	0.0873016	0.501	0.649622	0.748663
Cervical Cancer	Mixed Cervical Carcinoma	1	152	8	496	0.00653595	0.015873	0.693	0.814173	0.411765
Cervical Cancer	Gastric Type Mucinous Carcinoma	3	150	36	468	0.0196078	0.0714286	0.0176	0.0467608	0.27451
CNS Cancer	Papillary Meningioma	NA	NA	1	386	NA	0.00258398	NA	NA	#VALUE!
CNS Cancer	Anaplastic Ependymoma	20	83	8	379	0.194175	0.0206718	4.12e-09	4.13526e-08	9.3932
CNS Cancer	Myxopapillary Ependymoma	8	95	6	381	0.0776699	0.0155039	0.0029	0.0102065	5.00971
CNS Cancer	Clear Cell Ependymoma	1	102	1	386	0.00970874	0.00258398	0.377	0.546348	3.75728
CNS Cancer	Clear cell Meningioma	1	102	1	386	0.00970874	0.00258398	0.377	0.546348	3.75728
CNS Cancer	Rhabdoid Meningioma	3	100	3	384	0.0291262	0.00775194	0.111	0.219569	3.75728
CNS Cancer	Ependymomal Tumor	2	101	2	385	0.0194175	0.00516796	0.196	0.347163	3.75728
CNS Cancer	Subependymoma	2	101	7	380	0.0194175	0.0180879	1	1	1.07351
CNS Cancer	Anaplastic Meningioma	7	96	26	361	0.0679612	0.0671835	1	1	1.01158
CNS Cancer	Hemangiopericytoma of the Central Nervous System	2	101	10	377	0.0194175	0.0258398	1	1	0.751456
CNS Cancer	Meningothelial Tumor	1	102	5	382	0.00970874	0.0129199	1	1	0.751456
CNS Cancer	Meningioma	44	59	244	143	0.427184	0.630491	0.000287	0.00131825	0.677543
CNS Cancer	Atypical Meningioma	11	92	63	324	0.106796	0.162791	0.215	0.368766	0.656033
CNS Cancer	Solitary Fibrous Tumor of the Central Nervous System	1	102	10	377	0.00970874	0.0258398	0.472	0.63956	0.375728
Colorectal Cancer	Colon Adenocarcinoma In Situ	2	963	6	10020	0.00207254	0.000598444	0.151	0.280281	3.46321
Colorectal Cancer	Signet Ring Cell Adenocarcinoma of the Colon and Rectum	13	952	60	9966	0.0134715	0.00598444	0.0115	0.0324635	2.25109
Colorectal Cancer	Mucinous Adenocarcinoma of the Colon and Rectum	35	930	280	9746	0.0362694	0.0279274	0.156	0.287592	1.2987
Colorectal Cancer	Rectal Adenocarcinoma	176	789	1662	8364	0.182383	0.165769	0.19	0.33875	1.10023
Colorectal Cancer	Colorectal Adenocarcinoma	222	743	2150	7876	0.230052	0.214442	0.269	0.428818	1.07279
Colorectal Cancer	Colon Adenocarcinoma	516	449	5852	4174	0.534715	0.583682	0.00369	0.0123456	0.916106
Colorectal Cancer	Medullary Carcinoma of the Colon	1	964	16	10010	0.00103627	0.00159585	1	1	0.649352
Esophagogastric Cancer	Tubular Stomach Adenocarcinoma	NA	NA	23	2860	NA	0.0079778	NA	NA	#VALUE!
Esophagogastric Cancer	Small Cell Carcinoma of the Stomach	NA	NA	5	2878	NA	0.0017343	NA	NA	#VALUE!
Esophagogastric Cancer	Undifferentiated Stomach Adenocarcinoma	NA	NA	3	2880	NA	0.00104058	NA	NA	#VALUE!
Esophagogastric Cancer	Gastrointestinal Neuroendocrine Tumors of the Esophagus/Stomach	NA	NA	2	2881	NA	0.000693722	NA	NA	#VALUE!
Esophagogastric Cancer	Adenosquamous Carcinoma of the Stomach	NA	NA	1	2882	NA	0.000346861	NA	NA	#VALUE!
Esophagogastric Cancer	Gastric Remnant Adenocarcinoma	NA	NA	1	2882	NA	0.000346861	NA	NA	#VALUE!
Esophagogastric Cancer	Smooth Muscle Neoplasm, NOS	2	178	2	2881	0.0111111	0.000693722	0.019	0.0490381	16.0167
Esophagogastric Cancer	Papillary Stomach Adenocarcinoma	1	179	2	2881	0.00555556	0.000693722	0.166	0.301713	8.00833
Esophagogastric Cancer	Mucinous Stomach Adenocarcinoma	2	178	9	2874	0.0111111	0.00312175	0.133	0.255624	3.55926
Esophagogastric Cancer	Signet Ring Cell Carcinoma of the Stomach	15	165	89	2794	0.0833333	0.0308706	0.000896	0.00357082	2.69944
Esophagogastric Cancer	Poorly Differentiated Carcinoma of the Stomach	12	168	92	2791	0.0666667	0.0319112	0.019	0.0490381	2.08913
Esophagogastric Cancer	Diffuse Type Stomach Adenocarcinoma	4	176	46	2837	0.0222222	0.0159556	0.535	0.6775	1.39275
Esophagogastric Cancer	Stomach Adenocarcinoma	58	122	689	2194	0.322222	0.238987	0.0154	0.0413208	1.34828
Esophagogastric Cancer	Esophageal Poorly Differentiated Carcinoma	4	176	52	2831	0.0222222	0.0180368	0.569	0.704105	1.23205
Esophagogastric Cancer	Esophagogastric Adenocarcinoma	13	167	253	2630	0.0722222	0.0877558	0.585	0.717353	0.822991
Esophagogastric Cancer	Esophageal Adenocarcinoma	46	134	956	1927	0.255556	0.331599	0.0403	0.0958009	0.770676
Esophagogastric Cancer	Intestinal Type Stomach Adenocarcinoma	2	178	43	2840	0.0111111	0.014915	1	1	0.744961
Esophagogastric Cancer	Adenocarcinoma of the Gastroesophageal Junction	18	162	421	2462	0.1	0.146028	0.0994	0.20687	0.684798
Esophagogastric Cancer	Esophageal Squamous Cell Carcinoma	3	177	194	2689	0.0166667	0.067291	0.00421	0.0139135	0.24768
Germ Cell Tumor	Dysgerminoma	6	502	NA	NA	0.011811	NA	NA	NA	#VALUE!
Germ Cell Tumor	Germ Cell Tumor, Brain	3	505	NA	NA	0.00590551	NA	NA	NA	#VALUE!
Germ Cell Tumor	Germinoma	2	506	NA	NA	0.00393701	NA	NA	NA	#VALUE!
Germ Cell Tumor	Immature Teratoma	15	493	2	267	0.0295276	0.00743494	0.0676	0.151402	3.97146
Germ Cell Tumor	Embryonal Carcinoma	37	471	8	261	0.0728346	0.0297398	0.0149	0.0407869	2.44906
Germ Cell Tumor	Choriocarcinoma	21	487	6	263	0.0413386	0.0223048	0.217	0.369855	1.85335
Germ Cell Tumor	Mixed Germ Cell Tumor	231	277	75	194	0.454724	0.27881	1.62e-06	1.07078e-05	1.63094
Germ Cell Tumor	Non-Seminomatous Germ Cell Tumor	48	460	21	248	0.0944882	0.0780669	0.508	0.653739	1.21035
Germ Cell Tumor	Extra Gonadal Germ Cell Tumor	4	504	2	267	0.00787402	0.00743494	1	1	1.05906
Germ Cell Tumor	Ovarian Germ Cell Tumor	4	504	2	267	0.00787402	0.00743494	1	1	1.05906
Germ Cell Tumor	Yolk Sac Tumor	42	466	29	240	0.0826772	0.107807	0.295	0.456829	0.766902
Germ Cell Tumor	Teratoma	12	496	9	260	0.023622	0.0334572	0.487	0.645927	0.706037
Germ Cell Tumor	Germ Cell Tumor with Somatic-Type Malignancy	11	497	13	256	0.0216535	0.0483271	0.0498	0.114371	0.448062
Germ Cell Tumor	Seminoma	65	443	89	180	0.127953	0.330855	5.75e-11	6.775e-10	0.386734
Germ Cell Tumor	Mature Teratoma	7	501	13	256	0.0137795	0.0483271	0.00703	0.0204853	0.28513
Glioma	Small Cell Glioblastoma	NA	NA	8	4360	NA	0.0018315	NA	NA	#VALUE!
Glioma	Dysembryoplastic Neuroepithelial Tumor	7	1365	NA	NA	0.00510204	NA	NA	NA	#VALUE!
Glioma	Pilomyxoid Astrocytoma	1	1371	NA	NA	0.000728863	NA	NA	NA	#VALUE!
Glioma	Anaplastic Pleomorphic Xanthoastrocytoma	11	1361	4	4364	0.00801749	0.000915751	7.23e-05	0.000384182	8.7551
Glioma	Ganglioglioma	32	1340	13	4355	0.0233236	0.00297619	2.49e-11	3.06723e-10	7.83673
Glioma	Pleomorphic Xanthoastrocytoma	7	1365	3	4365	0.00510204	0.000686813	0.00263	0.00937803	7.42857
Glioma	Encapsulated Glioma	8	1364	4	4364	0.0058309	0.000915751	0.00202	0.00760306	6.36735
Glioma	Diffuse Intrinsic Pontine Glioma	5	1367	3	4365	0.00364431	0.000686813	0.0225	0.0575236	5.30612
Glioma	Low-Grade Glioma, NOS	47	1325	36	4332	0.0342566	0.00824176	1.23e-10	1.38887e-09	4.15646
Glioma	Diffuse Astrocytoma	54	1318	44	4324	0.0393586	0.0100733	2.32e-11	2.9939e-10	3.90724
Glioma	Pilocytic Astrocytoma	33	1339	27	4341	0.0240525	0.00618132	2.6e-07	1.90432e-06	3.89116
Glioma	Ependymoma	27	1345	27	4341	0.0196793	0.00618132	3.26e-05	0.00018797	3.18367
Glioma	Gangliocytoma	1	1371	1	4367	0.000728863	0.000228938	0.421	0.597335	3.18367
Glioma	Diffuse Glioma	88	1284	91	4277	0.0641399	0.0208333	9e-14	1.28368e-12	3.07872
Glioma	Oligoastrocytoma	13	1359	14	4354	0.00947522	0.00320513	0.0057	0.0179616	2.95627
Glioma	Anaplastic Astrocytoma	213	1159	295	4073	0.155248	0.0675366	4.38e-21	1.69569e-19	2.29872
Glioma	Astrocytoma	169	1203	236	4132	0.123178	0.0540293	1.84e-16	3.32427e-15	2.27983
Glioma	Glioma, NOS	41	1331	58	4310	0.0298834	0.0132784	0.000112	0.000542	2.25053
Glioma	Anaplastic Oligoastrocytoma	20	1352	30	4338	0.0145773	0.00686813	0.0115	0.0324635	2.12245
Glioma	Oligodendroglioma	108	1264	204	4164	0.0787172	0.0467033	1.13e-05	6.95977e-05	1.68547
Glioma	Anaplastic Ganglioglioma	3	1369	6	4362	0.00218659	0.00137363	0.454	0.624121	1.59184
Glioma	High-Grade Glioma, NOS	66	1306	139	4229	0.048105	0.0318223	0.00583	0.0181601	1.51167
Glioma	Anaplastic Oligodendroglioma	57	1315	149	4219	0.0415452	0.0341117	0.212	0.365936	1.21792
Glioma	Glioblastoma	171	1201	1249	3119	0.124636	0.285943	5.13e-37	3.47558e-35	0.435875
Glioma	Gliosarcoma	8	1364	67	4301	0.0058309	0.0153388	0.00591	0.0182001	0.38014
Glioma	Glioblastoma Multiforme	182	1190	1660	2708	0.132653	0.380037	2.43e-73	6.5853e-71	0.349053
Head and Neck Cancer	Hypopharynx Squamous Cell Carcinoma	NA	NA	29	1531	NA	0.0185897	NA	NA	#VALUE!
Head and Neck Cancer	Epithelial-Myoepithelial Carcinoma	NA	NA	10	1550	NA	0.00641026	NA	NA	#VALUE!
Head and Neck Cancer	Clear Cell Odontogenic Carcinoma	NA	NA	3	1557	NA	0.00192308	NA	NA	#VALUE!
Head and Neck Cancer	NUT Midline Carcinoma of the Head and Neck	10	101	6	1554	0.0900901	0.00384615	6.44e-09	6.01807e-08	23.4234
Head and Neck Cancer	Adenosquamous Carcinoma of the Tongue	1	110	1	1559	0.00900901	0.000641026	0.128	0.247771	14.0541
Head and Neck Cancer	Odontogenic Carcinoma	1	110	1	1559	0.00900901	0.000641026	0.128	0.247771	14.0541
Head and Neck Cancer	Sinonasal Undifferentiated Carcinoma	4	107	12	1548	0.036036	0.00769231	0.018	0.0473592	4.68468
Head and Neck Cancer	Head and Neck Carcinoma, Other	10	101	44	1516	0.0900901	0.0282051	0.00222	0.00813	3.1941
Head and Neck Cancer	Nasopharyngeal Carcinoma	14	97	68	1492	0.126126	0.0435897	0.000681	0.00283925	2.89348
Head and Neck Cancer	Head and Neck Neuroendocrine Carcinoma	2	109	21	1539	0.018018	0.0134615	0.662	0.793814	1.33848
Head and Neck Cancer	Oral Cavity Squamous Cell Carcinoma	39	72	422	1138	0.351351	0.270513	0.0781	0.170686	1.29883
Head and Neck Cancer	Sinonasal Adenocarcinoma	1	110	13	1547	0.00900901	0.00833333	1	1	1.08108
Head and Neck Cancer	Sinonasal Squamous Cell Carcinoma	2	109	45	1515	0.018018	0.0288462	0.766	0.87221	0.624625
Head and Neck Cancer	Head and Neck Squamous Cell Carcinoma	17	94	462	1098	0.153153	0.296154	0.00102	0.00394886	0.517141
Head and Neck Cancer	Head and Neck Squamous Cell Carcinoma of Unknown Primary	1	110	29	1531	0.00900901	0.0185897	0.717	0.830372	0.484623
Head and Neck Cancer	Larynx Squamous Cell Carcinoma	3	108	95	1465	0.027027	0.0608974	0.206	0.357859	0.443812
Head and Neck Cancer	Oropharynx Squamous Cell Carcinoma	6	105	299	1261	0.0540541	0.191667	0.000103	0.000516907	0.282021
Hepatobiliary Cancer	Adenosquamous Carcinoma of the Gallbladder	NA	NA	10	2013	NA	0.00494315	NA	NA	#VALUE!
Hepatobiliary Cancer	Hepatoblastoma	1	150	NA	NA	0.00662252	NA	NA	NA	#VALUE!
Hepatobiliary Cancer	Hepatocellular Adenoma	1	150	NA	NA	0.00662252	NA	NA	NA	#VALUE!
Hepatobiliary Cancer	Malignant Nonepithelial Tumor of the Liver	1	150	NA	NA	0.00662252	NA	NA	NA	#VALUE!
Hepatobiliary Cancer	Fibrolamellar Carcinoma	34	117	3	2020	0.225166	0.00148295	6.34e-38	5.72713e-36	151.837
Hepatobiliary Cancer	Liver Angiosarcoma	1	150	3	2020	0.00662252	0.00148295	0.25	0.400888	4.46578
Hepatobiliary Cancer	Hepatocellular Carcinoma	36	115	398	1625	0.238411	0.196738	0.245	0.39997	1.21182
Hepatobiliary Cancer	Perihilar Cholangiocarcinoma	2	149	24	1999	0.013245	0.0118636	0.701	0.815326	1.11645
Hepatobiliary Cancer	Cholangiocarcinoma	25	126	418	1605	0.165563	0.206624	0.25	0.400888	0.801277
Hepatobiliary Cancer	Intrahepatic Cholangiocarcinoma	35	116	611	1412	0.231788	0.302027	0.0791	0.171489	0.767442
Hepatobiliary Cancer	Extrahepatic Cholangiocarcinoma	9	142	168	1855	0.0596026	0.083045	0.358	0.527272	0.717715
Hepatobiliary Cancer	Hepatocellular Carcinoma plus Intrahepatic Cholangiocarcinoma	2	149	60	1963	0.013245	0.0296589	0.317	0.482624	0.446578
Hepatobiliary Cancer	Gallbladder Adenocarcinoma, NOS	2	149	107	1916	0.013245	0.0528917	0.0309	0.0768248	0.250418
Hepatobiliary Cancer	Gallbladder Cancer	2	149	221	1802	0.013245	0.109244	1.82e-05	0.000107222	0.121243
Leukemia	Therapy-Related Myeloid Neoplasms	NA	NA	18	1912	NA	0.00932642	NA	NA	#VALUE!
Leukemia	AML with BCR-ABL1	NA	NA	4	1926	NA	0.00207254	NA	NA	#VALUE!
Leukemia	Mixed Phenotype Acute Leukemia, T/Myeloid, NOS	NA	NA	4	1926	NA	0.00207254	NA	NA	#VALUE!
Leukemia	Acute Megakaryoblastic Leukemia	NA	NA	3	1927	NA	0.0015544	NA	NA	#VALUE!
Leukemia	AML with Recurrent Genetic Abnormalities	NA	NA	3	1927	NA	0.0015544	NA	NA	#VALUE!
Leukemia	AML with t(6;9)(p23;q34.1);DEK-NUP214	NA	NA	3	1927	NA	0.0015544	NA	NA	#VALUE!
Leukemia	Mixed Phenotype Acute Leukemia with t(9;22)(q34.1;q11.2); BCR-ABL1	NA	NA	3	1927	NA	0.0015544	NA	NA	#VALUE!
Leukemia	AML with Mutated RUNX1	NA	NA	2	1928	NA	0.00103627	NA	NA	#VALUE!
Leukemia	Mixed Phenotype Acute Leukemia with t(v;11q23.3); KMT2A Rearranged	NA	NA	2	1928	NA	0.00103627	NA	NA	#VALUE!
Leukemia	Myeloid/Lymphoid Neoplasms with PDGFRA Rearrangement	NA	NA	2	1928	NA	0.00103627	NA	NA	#VALUE!
Leukemia	Acute Panmyelosis with Myelofibrosis	NA	NA	1	1929	NA	0.000518135	NA	NA	#VALUE!
Leukemia	Myeloid Sarcoma	NA	NA	1	1929	NA	0.000518135	NA	NA	#VALUE!
Leukemia	Pure Erythroid Leukemia	NA	NA	1	1929	NA	0.000518135	NA	NA	#VALUE!
Leukemia	AML with t(9;11)(p21.3;q23.3);MLLT3-KMT2A	5	232	1	1929	0.021097	0.000518135	8.23e-05	0.00042891	40.7173
Leukemia	Acute Undifferentiated Leukemia	2	235	3	1927	0.00843882	0.0015544	0.0953	0.200204	5.42897
Leukemia	AML with Biallelic Mutations of CEBPA	3	234	5	1925	0.0126582	0.00259067	0.0477	0.111437	4.88608
Leukemia	AML with t(8;21)(q22;q22.1);RUNX1-RUNX1T1	10	227	24	1906	0.0421941	0.0124352	0.00246	0.0088888	3.39311
Leukemia	AML with inv(16)(p13.1q22) or t(16;16)(p13.1;q22);CBFB-MYH11	4	233	13	1917	0.0168776	0.00673575	0.106	0.215985	2.50568
Leukemia	APL with PML-RARA	9	228	32	1898	0.0379747	0.0165803	0.0375	0.0915541	2.29035
Leukemia	Acute Leukemias of Ambiguous Lineage	1	236	5	1925	0.00421941	0.00259067	0.501	0.649622	1.62869
Leukemia	AML without Maturation	6	231	34	1896	0.0253165	0.0176166	0.437	0.608708	1.43708
Leukemia	Acute Myelomonocytic Leukemia	4	233	23	1907	0.0168776	0.0119171	0.528	0.673047	1.41625
Leukemia	Mixed Phenotype Acute Leukemia, B/Myeloid, NOS	2	235	14	1916	0.00843882	0.00725389	0.692	0.814173	1.16335
Leukemia	Acute Myeloid Leukemia	153	84	1137	793	0.64557	0.589119	0.107	0.216396	1.09582
Leukemia	Acute Monoblastic/Monocytic Leukemia	6	231	45	1885	0.0253165	0.0233161	0.82	0.910738	1.08579
Leukemia	AML with Mutated NPM1	10	227	109	1821	0.0421941	0.0564767	0.45	0.622194	0.747106
Leukemia	AML, NOS	4	233	44	1886	0.0168776	0.0227979	0.814	0.907794	0.740315
Leukemia	AML with inv(3)(q21.3q26.2) or t(3;3)(q21.3;q26.2); GATA2, MECOM	1	236	11	1919	0.00421941	0.00569948	1	1	0.740315
Leukemia	AML with Minimal Differentiation	1	236	11	1919	0.00421941	0.00569948	1	1	0.740315
Leukemia	AML with Maturation	3	234	52	1878	0.0126582	0.026943	0.271	0.42948	0.469815
Leukemia	Therapy-Related Myelodysplastic Syndrome	3	234	57	1873	0.0126582	0.0295337	0.204	0.356671	0.428603
Leukemia	Therapy-Related Acute Myeloid Leukemia	3	234	60	1870	0.0126582	0.0310881	0.148	0.276607	0.407173
Leukemia	AML with Myelodysplasia-Related Changes	7	230	203	1727	0.0295359	0.105181	5.85e-05	0.00031707	0.280809
Melanoma	Desmoplastic Melanoma	NA	NA	32	4035	NA	0.00786821	NA	NA	#VALUE!
Melanoma	Conjunctival Melanoma	NA	NA	13	4054	NA	0.00319646	NA	NA	#VALUE!
Melanoma	Mucosal Melanoma of the Urethra	NA	NA	13	4054	NA	0.00319646	NA	NA	#VALUE!
Melanoma	Mucosal Melanoma of the Esophagus	NA	NA	4	4063	NA	0.000983526	NA	NA	#VALUE!
Melanoma	Primary CNS Melanoma	NA	NA	3	4064	NA	0.000737644	NA	NA	#VALUE!
Melanoma	Congenital Nevus	NA	NA	1	4066	NA	0.000245881	NA	NA	#VALUE!
Melanoma	Uveal Melanoma	23	373	190	3877	0.0580808	0.0467175	0.322	0.487497	1.24323
Melanoma	Cutaneous Melanoma	170	226	1483	2584	0.429293	0.364642	0.0121	0.0338052	1.1773
Melanoma	Melanoma	160	236	1593	2474	0.40404	0.391689	0.628	0.763175	1.03153
Melanoma	Head and Neck Mucosal Melanoma	8	388	85	3982	0.020202	0.0208999	1	1	0.966607
Melanoma	Lentigo Maligna Melanoma	1	395	14	4053	0.00252525	0.00344234	1	1	0.733586
Melanoma	Melanoma of Unknown Primary	18	378	252	3815	0.0454545	0.0619621	0.224	0.374716	0.733586
Melanoma	Anorectal Mucosal Melanoma	7	389	110	3957	0.0176768	0.027047	0.324	0.4878	0.653558
Melanoma	Ocular Melanoma	2	394	36	4031	0.00505051	0.00885173	0.771	0.87423	0.570567
Melanoma	Acral Melanoma	5	391	154	3913	0.0126263	0.0378657	0.00646	0.0192976	0.333448
Melanoma	Mucosal Melanoma of the Vulva/Vagina	2	394	84	3983	0.00505051	0.020654	0.0322	0.0793291	0.244529
Non-Small Cell Lung Cancer	Lung Adenosquamous Carcinoma	NA	NA	120	16238	NA	0.00733586	NA	NA	#VALUE!
Non-Small Cell Lung Cancer	Pleomorphic Carcinoma of the Lung	NA	NA	71	16287	NA	0.00434038	NA	NA	#VALUE!
Non-Small Cell Lung Cancer	Lung Adenocarcinoma In Situ	NA	NA	26	16332	NA	0.00158944	NA	NA	#VALUE!
Non-Small Cell Lung Cancer	Spindle Cell Carcinoma of the Lung	NA	NA	9	16349	NA	0.00055019	NA	NA	#VALUE!
Non-Small Cell Lung Cancer	Giant Cell Carcinoma of the Lung	NA	NA	6	16352	NA	0.000366793	NA	NA	#VALUE!
Non-Small Cell Lung Cancer	Ciliated Muconodular Papillary Tumor of the Lung	NA	NA	4	16354	NA	0.000244529	NA	NA	#VALUE!
Non-Small Cell Lung Cancer	Salivary Gland-Type Tumor of the Lung	NA	NA	3	16355	NA	0.000183397	NA	NA	#VALUE!
Non-Small Cell Lung Cancer	Lymphoepithelioma-like Carcinoma of the Lung	NA	NA	2	16356	NA	0.000122264	NA	NA	#VALUE!
Non-Small Cell Lung Cancer	Basaloid Large Cell Carcinoma of the Lung	NA	NA	1	16357	NA	6.11322e-05	NA	NA	#VALUE!
Non-Small Cell Lung Cancer	Pulmonary Lymphangiomyomatosis	NA	NA	1	16357	NA	6.11322e-05	NA	NA	#VALUE!
Non-Small Cell Lung Cancer	Clear Cell Carcinoma of the Lung	1	253	NA	NA	0.00393701	NA	NA	NA	#VALUE!
Non-Small Cell Lung Cancer	Pleuropulmonary Blastoma	1	253	NA	NA	0.00393701	NA	NA	NA	#VALUE!
Non-Small Cell Lung Cancer	NUT Carcinoma of the Lung	1	253	1	16357	0.00393701	6.11322e-05	0.0303	0.0760306	64.4016
Non-Small Cell Lung Cancer	Inflammatory Myofibroblastic Lung Tumor	1	253	2	16356	0.00393701	0.000122264	0.0452	0.106515	32.2008
Non-Small Cell Lung Cancer	Mucoepidermoid Carcinoma of the Lung	1	253	3	16355	0.00393701	0.000183397	0.0598	0.136183	21.4672
Non-Small Cell Lung Cancer	Lung Carcinoid	14	240	149	16209	0.0551181	0.00910869	2.13e-07	1.60342e-06	6.05115
Non-Small Cell Lung Cancer	Adenoid Cystic Carcinoma of the Lung	1	253	15	16343	0.00393701	0.000916983	0.219	0.370311	4.29344
Non-Small Cell Lung Cancer	Lung Neuroendocrine Tumor	2	252	57	16301	0.00787402	0.00348453	0.228	0.379067	2.2597
Non-Small Cell Lung Cancer	Atypical Lung Carcinoid	3	251	94	16264	0.011811	0.00574642	0.186	0.333815	2.05537
Non-Small Cell Lung Cancer	Large Cell Lung Carcinoma	1	253	41	16317	0.00393701	0.00250642	0.477	0.643119	1.57077
Non-Small Cell Lung Cancer	Large Cell Neuroendocrine Carcinoma	4	250	198	16160	0.015748	0.0121042	0.555	0.693111	1.30104
Non-Small Cell Lung Cancer	Non-Small Cell Lung Cancer	17	237	949	15409	0.0669291	0.0580144	0.5	0.649622	1.15366
Non-Small Cell Lung Cancer	Poorly Differentiated Non-Small Cell Lung Cancer	5	249	287	16071	0.019685	0.0175449	0.807	0.903707	1.12198
Non-Small Cell Lung Cancer	Lung Adenocarcinoma	193	61	12687	3671	0.759843	0.775584	0.545	0.683773	0.979704
Non-Small Cell Lung Cancer	Sarcomatoid Carcinoma of the Lung	1	253	77	16281	0.00393701	0.00470718	1	1	0.836384
Non-Small Cell Lung Cancer	Lung Squamous Cell Carcinoma	8	246	1555	14803	0.0314961	0.0950605	0.000192	0.000912842	0.331326
Ovarian Cancer	High-Grade Serous Fallopian Tube Cancer	NA	NA	87	3910	NA	0.0217663	NA	NA	#VALUE!
Ovarian Cancer	Brenner Tumor	NA	NA	3	3994	NA	0.000750563	NA	NA	#VALUE!
Ovarian Cancer	Ovarian Choriocarcinoma, NOS	NA	NA	2	3995	NA	0.000500375	NA	NA	#VALUE!
Ovarian Cancer	Ovarian Seromucinous Borderline Tumor	NA	NA	2	3995	NA	0.000500375	NA	NA	#VALUE!
Ovarian Cancer	Clear Cell Borderline Ovarian Tumor	NA	NA	1	3996	NA	0.000250188	NA	NA	#VALUE!
Ovarian Cancer	Endometrioid Borderlin Ovarian Tumor	NA	NA	1	3996	NA	0.000250188	NA	NA	#VALUE!
Ovarian Cancer	Ovarian Seromucinous Adenoma	NA	NA	1	3996	NA	0.000250188	NA	NA	#VALUE!
Ovarian Cancer	Small Cell Carcinoma of the Ovary	18	206	10	3987	0.0803571	0.00250188	4.67e-17	9.73515e-16	32.1188
Ovarian Cancer	Mucinous Ovarian Cancer	34	190	70	3927	0.151786	0.0175131	4.37e-19	1.31586e-17	8.66696
Ovarian Cancer	Mucinous Borderline Ovarian Tumor	6	218	13	3984	0.0267857	0.00325244	0.000316	0.00140387	8.23558
Ovarian Cancer	Serous Borderline Ovarian Tumor, Micropapillary	4	220	10	3987	0.0178571	0.00250188	0.00507	0.0163568	7.1375
Ovarian Cancer	Serous Borderline Ovarian Tumor	12	212	31	3966	0.0535714	0.00775582	1.32e-06	9.17231e-06	6.90726
Ovarian Cancer	Low-Grade Serous Ovarian Cancer	55	169	202	3795	0.245536	0.0505379	9.07e-21	3.07246e-19	4.85845
Ovarian Cancer	High-Grade Neuroendocrine Carcinoma of the Ovary	1	223	4	3993	0.00446429	0.00100075	0.239	0.394933	4.46094
Ovarian Cancer	Ovarian Seromucinous Carcinoma	1	223	7	3990	0.00446429	0.00175131	0.354	0.52423	2.54911
Ovarian Cancer	Ovarian Epithelial Tumor	10	214	107	3890	0.0446429	0.0267701	0.137	0.261458	1.66764
Ovarian Cancer	Clear Cell Ovarian Cancer	20	204	236	3761	0.0892857	0.0590443	0.082	0.176365	1.51218
Ovarian Cancer	Endometrioid Ovarian Cancer	11	213	163	3834	0.0491071	0.0407806	0.491	0.645927	1.20418
Ovarian Cancer	Ovarian Cancer, Other	3	221	51	3946	0.0133929	0.0127596	0.763	0.87221	1.04963
Ovarian Cancer	Mixed Ovarian Carcinoma	4	220	68	3929	0.0178571	0.0170128	0.792	0.890589	1.04963
Ovarian Cancer	Serous Ovarian Cancer	19	205	330	3667	0.0848214	0.0825619	0.901	0.992565	1.02737
Ovarian Cancer	High-Grade Serous Ovarian Cancer	25	199	2447	1550	0.111607	0.612209	5.24e-52	7.1002e-50	0.182302
Ovarian Cancer	Ovarian Carcinosarcoma/Malignant Mixed Mesodermal Tumor	1	223	151	3846	0.00446429	0.0377783	0.00466	0.0152152	0.118171
Pancreatic Cancer	Adenosquamous Carcinoma of the Pancreas	NA	NA	71	4193	NA	0.016651	NA	NA	#VALUE!
Pancreatic Cancer	Intraductal Papillary Mucinous Neoplasm	NA	NA	25	4239	NA	0.00586304	NA	NA	#VALUE!
Pancreatic Cancer	Pancreatoblastoma	NA	NA	3	4261	NA	0.000703565	NA	NA	#VALUE!
Pancreatic Cancer	Cystic Tumor of the Pancreas	NA	NA	1	4263	NA	0.000234522	NA	NA	#VALUE!
Pancreatic Cancer	Osteoclastic Giant Cell Tumor	NA	NA	1	4263	NA	0.000234522	NA	NA	#VALUE!
Pancreatic Cancer	Serous Cystadenoma of the Pancreas	NA	NA	1	4263	NA	0.000234522	NA	NA	#VALUE!
Pancreatic Cancer	Solid Pseudopapillary Neoplasm of the Pancreas	6	123	13	4251	0.0465116	0.00304878	1.13e-05	6.95977e-05	15.2558
Pancreatic Cancer	Mucinous Cystic Neoplasm	1	128	5	4259	0.00775194	0.00117261	0.164	0.300297	6.61085
Pancreatic Cancer	Pancreatic Neuroendocrine Tumor	49	80	404	3860	0.379845	0.0947467	2.06e-17	5.07509e-16	4.00906
Pancreatic Cancer	Acinar Cell Carcinoma of the Pancreas	3	126	66	4198	0.0232558	0.0154784	0.456	0.624121	1.50247
Pancreatic Cancer	Undifferentiated Carcinoma of the Pancreas	1	128	38	4226	0.00775194	0.00891182	1	1	0.869849
Pancreatic Cancer	Pancreatic Adenocarcinoma	69	60	3636	628	0.534884	0.85272	4.16e-17	9.39467e-16	0.627267
Renal Cell Carcinoma	Renal Small Cell Carcinoma	NA	NA	3	1644	NA	0.00182149	NA	NA	#VALUE!
Renal Cell Carcinoma	Renal Medullary Carcinoma	18	145	30	1617	0.110429	0.0182149	4.12e-08	3.48912e-07	6.06258
Renal Cell Carcinoma	Translocation-Associated Renal Cell Carcinoma	12	151	21	1626	0.0736196	0.0127505	1.27e-05	7.64822e-05	5.77388
Renal Cell Carcinoma	Renal Non-Clear Cell Carcinoma	6	157	14	1633	0.0368098	0.0085003	0.00648	0.0192976	4.33041
Renal Cell Carcinoma	FH-Deficient Renal Cell Carcinoma	4	159	11	1636	0.0245399	0.00667881	0.0393	0.0942504	3.67429
Renal Cell Carcinoma	Unclassified Renal Cell Carcinoma	23	140	98	1549	0.141104	0.0595021	0.00038	0.00166097	2.37142
Renal Cell Carcinoma	Renal Angiomyolipoma	4	159	21	1626	0.0245399	0.0127505	0.275	0.433285	1.92463
Renal Cell Carcinoma	Collecting Duct Renal Cell Carcinoma	3	160	16	1631	0.0184049	0.00971463	0.241	0.395824	1.89456
Renal Cell Carcinoma	Chromophobe Renal Cell Carcinoma	13	150	72	1575	0.0797546	0.0437158	0.0498	0.114371	1.82439
Renal Cell Carcinoma	Renal Mucinous Tubular Spindle Cell Carcinoma	1	162	6	1641	0.00613497	0.00364299	0.484	0.645927	1.68405
Renal Cell Carcinoma	Renal Clear Cell Carcinoma with Sarcomatoid Features	2	161	14	1633	0.0122699	0.0085003	0.649	0.781684	1.44347
Renal Cell Carcinoma	Clear Cell Papillary Renal Cell Carcinoma	1	162	10	1637	0.00613497	0.00607165	1	1	1.01043
Renal Cell Carcinoma	Sarcomatoid Renal Cell Carcinoma	2	161	24	1623	0.0122699	0.0145719	1	1	0.842025
Renal Cell Carcinoma	Renal Cell Carcinoma	23	140	316	1331	0.141104	0.191864	0.14	0.265315	0.735439
Renal Cell Carcinoma	Papillary Renal Cell Carcinoma	8	155	147	1500	0.0490798	0.0892532	0.104	0.213515	0.549894
Renal Cell Carcinoma	Renal Clear Cell Carcinoma	42	121	808	839	0.257669	0.490589	8.73e-09	7.63171e-08	0.525223
Renal Cell Carcinoma	Renal Oncocytoma	1	162	36	1611	0.00613497	0.0218579	0.248	0.400888	0.280675
Soft Tissue Sarcoma	Ossifying Fibromyxoid Tumor	NA	NA	4	2164	NA	0.00184502	NA	NA	#VALUE!
Soft Tissue Sarcoma	Tenosynovial Giant Cell Tumor Diffuse Type	NA	NA	3	2165	NA	0.00138376	NA	NA	#VALUE!
Soft Tissue Sarcoma	Glomangiosarcoma	NA	NA	2	2166	NA	0.000922509	NA	NA	#VALUE!
Soft Tissue Sarcoma	Interdigitating Dendritic Cell Sarcoma	NA	NA	2	2166	NA	0.000922509	NA	NA	#VALUE!
Soft Tissue Sarcoma	Atypical Lipomatous Tumor	NA	NA	1	2167	NA	0.000461255	NA	NA	#VALUE!
Soft Tissue Sarcoma	Ewing Sarcoma of Soft Tissue	6	634	NA	NA	0.009375	NA	NA	NA	#VALUE!
Soft Tissue Sarcoma	Myofibroma	1	639	NA	NA	0.0015625	NA	NA	NA	#VALUE!
Soft Tissue Sarcoma	Alveolar Rhabdomyosarcoma	19	621	3	2165	0.0296875	0.00138376	3.85e-10	4.1734e-09	21.4542
Soft Tissue Sarcoma	Desmoplastic Small-Round-Cell Tumor	51	589	9	2159	0.0796875	0.00415129	6.4e-25	2.89067e-23	19.1958
Soft Tissue Sarcoma	Hemangioma	37	603	10	2158	0.0578125	0.00461255	3.63e-16	6.14831e-15	12.5338
Soft Tissue Sarcoma	Proximal-Type Epithelioid Sarcoma	3	637	1	2167	0.0046875	0.000461255	0.0392	0.0942504	10.1625
Soft Tissue Sarcoma	Alveolar Soft Part Sarcoma	18	622	7	2161	0.028125	0.00322878	2.09e-07	1.60342e-06	8.71071
Soft Tissue Sarcoma	Low-Grade Fibromyxoid Sarcoma	9	631	4	2164	0.0140625	0.00184502	0.00046	0.00194781	7.62188
Soft Tissue Sarcoma	Rhabdomyosarcoma	22	618	15	2153	0.034375	0.00691882	1.48e-06	1.0027e-05	4.96833
Soft Tissue Sarcoma	Embryonal Rhabdomyosarcoma	11	629	9	2159	0.0171875	0.00415129	0.00172	0.00656507	4.14028
Soft Tissue Sarcoma	Desmoid/Aggressive Fibromatosis	33	607	28	2140	0.0515625	0.0129151	7.97e-08	6.54506e-07	3.99241
Soft Tissue Sarcoma	Synovial Sarcoma	72	568	64	2104	0.1125	0.0295203	4.1e-15	6.53588e-14	3.81094
Soft Tissue Sarcoma	Inflammatory Myofibroblastic Tumor	8	632	8	2160	0.0125	0.00369004	0.0154	0.0413208	3.3875
Soft Tissue Sarcoma	Pseudomyogenic Hemangioendothelioma	1	639	1	2167	0.0015625	0.000461255	0.404	0.57928	3.3875
Soft Tissue Sarcoma	Clear Cell Sarcoma	17	623	18	2150	0.0265625	0.00830258	0.000782	0.00321094	3.19931
Soft Tissue Sarcoma	Round Cell Sarcoma, NOS	11	629	13	2155	0.0171875	0.00599631	0.0123	0.0340133	2.86635
Soft Tissue Sarcoma	Epithelioid Sarcoma	19	621	25	2143	0.0296875	0.0115314	0.00299	0.0103883	2.5745
Soft Tissue Sarcoma	Soft Tissue Myoepithelial Carcinoma	7	633	12	2156	0.0109375	0.00553506	0.167	0.301713	1.97604
Soft Tissue Sarcoma	Myxoid/Round-Cell Liposarcoma	26	614	50	2118	0.040625	0.0230627	0.0254	0.0643308	1.7615
Soft Tissue Sarcoma	Epithelioid Hemangioendothelioma	15	625	29	2139	0.0234375	0.0133764	0.1	0.20687	1.75216
Soft Tissue Sarcoma	Spindle Cell Rhabdomyosarcoma	4	636	9	2159	0.00625	0.00415129	0.509	0.653739	1.50556
Soft Tissue Sarcoma	Sclerosing Epithelioid Fibrosarcoma	4	636	11	2157	0.00625	0.0050738	0.758	0.870415	1.23182
Soft Tissue Sarcoma	Intimal Sarcoma	7	633	20	2148	0.0109375	0.00922509	0.649	0.781684	1.18562
Soft Tissue Sarcoma	Fibrosarcoma	5	635	15	2153	0.0078125	0.00691882	0.791	0.890589	1.12917
Soft Tissue Sarcoma	Spindle Cell/Sclerosing Rhabdomyosarcoma	1	639	3	2165	0.0015625	0.00138376	1	1	1.12917
Soft Tissue Sarcoma	Sarcoma, NOS	75	565	276	1892	0.117188	0.127306	0.541	0.681912	0.920516
Soft Tissue Sarcoma	Perivascular Epithelioid Cell Tumor	8	632	32	2136	0.0125	0.0147601	0.85	0.940204	0.846875
Soft Tissue Sarcoma	Pleomorphic Liposarcoma	7	633	39	2129	0.0109375	0.0179889	0.287	0.446994	0.608013
Soft Tissue Sarcoma	Undifferentiated Pleomorphic Sarcoma/Malignant Fibrous Histiocytoma/High-Grade Spindle Cell Sarcoma	37	603	239	1929	0.0578125	0.11024	5.63e-05	0.000311373	0.524425
Soft Tissue Sarcoma	Angiosarcoma	17	623	125	2043	0.0265625	0.0576568	0.000982	0.00385684	0.4607
Soft Tissue Sarcoma	Myxoma	1	639	8	2160	0.0015625	0.00369004	0.694	0.814173	0.423438
Soft Tissue Sarcoma	Histiocytic Dendritic Cell Sarcoma	2	638	16	2152	0.003125	0.00738007	0.396	0.57083	0.423437
Soft Tissue Sarcoma	Leiomyosarcoma	45	595	417	1751	0.0703125	0.192343	5.94e-15	8.943e-14	0.365558
Soft Tissue Sarcoma	Liposarcoma	8	632	75	2093	0.0125	0.0345941	0.00311	0.0106685	0.361333
Soft Tissue Sarcoma	Solitary Fibrous Tumor/Hemangiopericytoma	11	629	105	2063	0.0171875	0.0484317	0.000252	0.00117745	0.354881
Soft Tissue Sarcoma	Follicular Dendritic Cell Sarcoma	1	639	15	2153	0.0015625	0.00691882	0.141	0.265354	0.225833
Soft Tissue Sarcoma	Pleomorphic Rhabdomyosarcoma	1	639	17	2151	0.0015625	0.00784133	0.0934	0.197745	0.199265
Soft Tissue Sarcoma	Radiation-Associated Sarcoma	1	639	19	2149	0.0015625	0.00876384	0.0615	0.138887	0.178289
Soft Tissue Sarcoma	Dedifferentiated Liposarcoma	13	627	251	1917	0.0203125	0.115775	1.83e-16	3.32427e-15	0.175448
Soft Tissue Sarcoma	Myxofibrosarcoma	3	637	77	2091	0.0046875	0.0355166	4.23e-06	2.72936e-05	0.131981
Soft Tissue Sarcoma	Well-Differentiated Liposarcoma	3	637	81	2087	0.0046875	0.0373616	1.11e-06	7.91605e-06	0.125463
Thyroid Cancer	Oncocytic Adenoma of the Thyroid	NA	NA	2	1330	NA	0.0015015	NA	NA	#VALUE!
Thyroid Cancer	Hyalinizing Trabecular Adenoma of the Thyroid	NA	NA	1	1331	NA	0.000750751	NA	NA	#VALUE!
Thyroid Cancer	Papillary Thyroid Cancer	175	69	690	642	0.717213	0.518018	7.25e-09	6.54917e-08	1.38453
Thyroid Cancer	Follicular Thyroid Cancer	14	230	56	1276	0.057377	0.042042	0.309	0.47579	1.36475
Thyroid Cancer	Medullary Thyroid Cancer	36	208	156	1176	0.147541	0.117117	0.201	0.353708	1.25977
Thyroid Cancer	Poorly Differentiated Thyroid Cancer	14	230	179	1153	0.057377	0.134384	0.000412	0.00177225	0.426962
Thyroid Cancer	Well-Differentiated Thyroid Cancer	1	243	15	1317	0.00409836	0.0112613	0.491	0.645927	0.363934
Thyroid Cancer	Anaplastic Thyroid Cancer	3	241	161	1171	0.0122951	0.120871	2.11e-09	2.19927e-08	0.101721
Thyroid Cancer	Hurthle Cell Thyroid Cancer	1	243	72	1260	0.00409836	0.0540541	8.88e-05	0.000454053	0.0758197

## Sheet: Molecular subtypes_TCGA
CANCER_TYPE	subtype_selected	AYA_count	AYA_others	OA_COUNT	OA_others	AYA_ratio	OA_ratio	p	FDR
LGG	GBM_LGG.G-CIMP-high	148	92	84	190	0.616667	0.306569	1.65e-12	6.93e-11
LGG	GBM_LGG.Mesenchymal-like	1	239	44	230	0.00416667	0.160584	4.09e-12	8.589e-11
GBM	GBM_LGG.G-CIMP-low	9	55	4	525	0.140625	0.00756144	5.88e-07	8.232e-06
GBM	GBM_LGG.Mesenchymal-like	4	60	163	366	0.0625	0.308129	6.62e-06	6.951e-05
GBM	GBM_LGG.Classic-like	2	62	123	406	0.03125	0.232514	3.22e-05	0.0002646
SKCM	SKCM.BRAF_Hotspot_Mutants	33	26	113	290	0.559322	0.280397	3.78e-05	0.0002646
GBM	GBM_LGG.G-CIMP-high	7	57	8	521	0.109375	0.0151229	0.000397	0.002382
GBM	GBM_LGG.LGm6-GBM	11	53	28	501	0.171875	0.0529301	0.00145	0.0076125
LGG	GBM_LGG.Codel	65	175	108	166	0.270833	0.394161	0.00369	0.01722
PCPG	PCPG.Pseudohypoxia	26	28	35	90	0.481481	0.28	0.0105	0.0441
LGG	GBM_LGG.PA-like	18	222	8	266	0.075	0.0291971	0.025	0.0875
THCA	THCA.3	38	142	43	282	0.211111	0.132308	0.023	0.0875
LIHC	LIHC.NA	3	29	10	334	0.09375	0.0290698	0.0891	0.2673
THCA	THCA.4	30	150	76	249	0.166667	0.233846	0.0871	0.2673
LIHC	LIHC.iCluster:3	2	30	61	283	0.0625	0.177326	0.135	0.378
GBM	GBM_LGG.NA	30	34	203	326	0.46875	0.383743	0.223	0.467727
KICH	KICH.Eosin.0	11	9	36	57	0.55	0.387097	0.215	0.467727
KICH	KICH.Eosin.1	1	19	18	75	0.05	0.193548	0.188	0.467727
LIHC	LIHC.iCluster:1	8	24	57	287	0.25	0.165698	0.226	0.467727
PCPG	PCPG.Wnt-altered	4	50	18	107	0.0740741	0.144	0.224	0.467727
SKCM	SKCM.Triple_WT	3	56	43	360	0.0508475	0.1067	0.245	0.467727
SKCM	SKCM.NF1_Any_Mutants	1	58	27	376	0.0169492	0.0669975	0.236	0.467727
PCPG	PCPG.Kinase signaling	17	37	51	74	0.314815	0.408	0.314	0.573391
THCA	THCA.NA	3	177	11	314	0.0166667	0.0338462	0.397	0.69475
BRCA	BRCA.Basal	16	60	177	846	0.210526	0.173021	0.434	0.712385
LIHC	LIHC.iCluster:2	6	26	49	295	0.1875	0.142442	0.441	0.712385
BRCA	BRCA.Normal	12	64	131	892	0.157895	0.128055	0.478	0.715448
THCA	THCA.1	44	136	90	235	0.244444	0.276923	0.462	0.715448
THCA	THCA.2	26	154	40	285	0.144444	0.123077	0.494	0.715448
LGG	GBM_LGG.G-CIMP-low	7	233	5	269	0.0291667	0.0182482	0.561	0.760065
THCA	THCA.5	36	144	57	268	0.2	0.175385	0.549	0.760065
BRCA	BRCA.Her2	4	72	78	945	0.0526316	0.0762463	0.649	0.826
PCPG	PCPG.NA	2	52	3	122	0.037037	0.024	0.638	0.826
ACC	ACC.NA	3	28	9	51	0.0967742	0.15	0.745	0.894
SKCM	SKCM.RAS_Hotspot_Mutants	10	49	81	322	0.169492	0.200993	0.726	0.894
ACC	ACC.CIMP-intermediate	10	21	17	43	0.322581	0.283333	0.809	0.918324
ACC	ACC.CIMP-high	7	24	12	48	0.225806	0.2	0.79	0.918324
BRCA	BRCA.LumA	41	35	540	483	0.539474	0.527859	0.905	0.974615
BRCA	BRCA.LumB	14	62	205	818	0.184211	0.200391	0.882	0.974615
ACC	ACC.CIMP-low	11	20	21	39	0.354839	0.35	1	1
LGG	GBM_LGG.NA	1	239	2	272	0.00416667	0.00729927	1	1
PCPG	PCPG.Cortical admixture	6	48	16	109	0.111111	0.128	1	1
GBM	GBM_LGG.Codel	1	63	NA	NA	0.015625	NA	NA	NA
LGG	GBM_LGG.Classic-like	NA	NA	23	251	NA	0.0839416	NA	NA
SKCM	SKCM.-	NA	NA	17	386	NA	0.0421836	NA	NA
