# Supplementary material for: Genomic disparities between cancers in adolescent and young adults and in older adults
Source: Nat Commun. 2022 Nov 24;13:7223. doi: 10.1038/s41467-022-34959-2 (PMC9700745; doi:10.1038/s41467-022-34959-2)
Supplement: Supplementary file 5 — Supplementary Data 2 [file 41467_2022_34959_MOESM5_ESM.xlsx]

## Sheet: TMB
	AYA_median	OA_median	p-value	FDR
Glioma	4.34099	4.26887	0.539	0.539
Bone Cancer	1.70755	1.70755	0.366	0.3904
Colorectal Cancer	6.03646	6.79101	0.000675	0.000830769
Breast Cancer	3.22002	3.78947	2.99e-16	1.59467e-15
Cervical Cancer	3.54595	4.26887	0.0568	0.0649143
Ovarian Cancer	2.58296	3.78947	7.4e-08	1.31556e-07
Pancreatic Cancer	2.56132	3.77278	3.64e-09	7.28e-09
Thyroid Cancer	1.70755	2.56132	3.21e-07	5.136e-07
Esophagogastric Cancer	3.41509	5.2819	7.97e-11	2.12533e-10
Hepatobiliary Cancer	2.14668	3.47279	7.99e-05	0.000106533
Cancer of Unknown Primary	3.01823	5.12264	5.45e-10	1.24571e-09
Melanoma	5.12264	9.39151	7.84e-11	2.12533e-10
Germ Cell Tumor	1.02573	1.89473	2.05e-05	2.98182e-05
Non-Small Cell Lung Cancer	3.22002	6.03646	4.62e-23	7.392e-22
Renal Cell Carcinoma	1.89473	3.78947	2.81e-13	1.124e-12
Soft Tissue Sarcoma	0.947367	2.26367	4.29e-18	3.432e-17
