# Supplementary material for: Genomic disparities between cancers in adolescent and young adults and in older adults
Source: Nat Commun. 2022 Nov 24;13:7223. doi: 10.1038/s41467-022-34959-2 (PMC9700745; doi:10.1038/s41467-022-34959-2)
Supplement: Supplementary file 6 — Supplementary Data 3 [file 41467_2022_34959_MOESM6_ESM.xlsx]

## Sheet: backbone model
		Logistic model results						Fisher's test results
Gene	Cancer type	Factors	Estimate	Std..Error	z.value	P value	FDR	#AYA_mut	#AYA_wt	#OA_mut	#OA_wt	P value	FDR	AYA_rate	OA_rate	Higher_in_AYA	Significant Variables
TET2	Mature T and NK Neoplasms	factor(aya_status)1	-17.4765	1229.42	-0.0142152	0.988658	1	0	25	60	111	9.10186e-05	0.0134833	0	0.350877	0	,histological subtype,,,
PIK3CA	Thyroid Cancer	factor(aya_status)1	-16.3912	741.052	-0.0221189	0.982353	1	0	199	58	1000	5.88852e-05	0.00954606	0	0.0548204	0	,histological subtype,,,
GRIN2A	Breast Cancer	factor(aya_status)1	-15.5885	411.268	-0.0379035	0.969765	1	0	673	107	5646	1.60159e-05	0.00295938	0	0.018599	0	,,,,undetermined
EGFR	Melanoma	factor(aya_status)1	-3.02575	1.00554	-3.00907	0.00262045	0.168662	1	230	211	2357	1.84716e-07	5.47269e-05	0.004329	0.0821651	0	,,,,undetermined
CDKN2A	Soft Tissue Sarcoma	factor(aya_status)1	-2.79078	1.02713	-2.71705	0.00658664	0.303824	1	568	45	1724	7.39215e-05	0.0113417	0.00175747	0.0254381	0	,,,,undetermined
TP53	Leukemia	factor(aya_status)1	-2.76547	1.01858	-2.71501	0.0066273	0.304554	1	59	79	295	4.83285e-05	0.00798536	0.0166667	0.21123	0	,,,,undetermined
TP53	Salivary Gland Cancer	factor(aya_status)1	-2.75523	1.04204	-2.64408	0.00819126	0.349253	1	48	121	351	2.65399e-05	0.0046537	0.0204082	0.256356	0	,histological subtype,,,
KEAP1	Non-Small Cell Lung Cancer	factor(aya_status)1	-2.53804	0.713417	-3.55758	0.000374286	0.0415425	2	159	1408	8514	1.47127e-08	5.74597e-06	0.0124224	0.141907	0	aya,,metastasis,sex,
ERBB2	Melanoma	factor(aya_status)1	-2.45416	1.00735	-2.43625	0.0148405	0.493301	1	230	124	2444	0.000359609	0.0414994	0.004329	0.0482866	0	,,,,undetermined
KEAP1	Cancer of Unknown Primary	factor(aya_status)1	-2.33719	1.0085	-2.31749	0.0204772	0.59085	1	136	183	2044	0.000227944	0.028384	0.00729927	0.0821733	0	,,,,undetermined
KRAS	Non-Small Cell Lung Cancer	factor(aya_status)1	-2.01671	0.344705	-5.85054	4.89978e-09	3.28066e-06	9	167	3329	8116	2.31392e-15	1.65676e-12	0.0511364	0.290869	0	aya,histological subtype,metastasis,sex,
PBRM1	Renal Cell Carcinoma	factor(aya_status)1	-2.00785	0.474167	-4.23448	2.29078e-05	0.00478146	5	124	403	884	5.86668e-14	3.87742e-11	0.0387597	0.313131	0	aya,histological subtype,,,
STK11	Non-Small Cell Lung Cancer	factor(aya_status)1	-1.85931	0.508071	-3.65955	0.000252659	0.0313123	4	164	1511	9431	6.66314e-07	0.000178905	0.0238095	0.138092	0	aya,,,sex,
CDH1	Breast Cancer	factor(aya_status)1	-1.84684	0.296352	-6.23192	4.60745e-10	3.86243e-07	14	900	1165	6591	5.71349e-42	1.22726e-38	0.0153173	0.150206	0	aya,histological subtype,,,
KIT	Melanoma	factor(aya_status)1	-1.68018	0.58885	-2.85332	0.00432644	0.234545	3	228	186	2383	9.64785e-05	0.0140499	0.012987	0.0724017	0	,histological subtype,,,
KRAS	Pancreatic Cancer	factor(aya_status)1	-1.61323	0.281809	-5.72455	1.03708e-08	6.40327e-06	36	71	2711	704	1.78208e-23	1.53116e-20	0.336449	0.793851	0	aya,histological subtype,,,
RBM10	Non-Small Cell Lung Cancer	factor(aya_status)1	-1.59358	0.585823	-2.72025	0.00652333	0.301897	3	137	885	7697	0.000359599	0.0414994	0.0214286	0.103123	0	,,metastasis,,
MEN1	Pancreatic Cancer	factor(aya_status)1	-1.58071	0.427992	-3.69331	0.000221351	0.0283525	7	96	185	3184	0.511115	1	0.0679612	0.0549124	1	aya,histological subtype,,,
PIK3C2G	Melanoma	factor(aya_status)1	-1.47501	0.465061	-3.17165	0.00151577	0.11509	5	133	216	1366	0.000271413	0.0328448	0.0362319	0.136536	0	,,,sex,
FOXA1	Breast Cancer	factor(aya_status)1	-1.46586	0.386099	-3.79659	0.000146701	0.0207782	7	755	283	5971	6.50656e-08	2.32935e-05	0.00918635	0.045251	0	aya,,,,
SETD2	Renal Cell Carcinoma	factor(aya_status)1	-1.46116	0.470845	-3.10328	0.00191392	0.136571	5	127	287	1087	1.01494e-07	3.35397e-05	0.0378788	0.208879	0	,,metastasis,,
FLT1	Melanoma	factor(aya_status)1	-1.41219	0.367758	-3.83999	0.000123039	0.0178941	8	207	327	2085	5.22337e-06	0.00112198	0.0372093	0.135572	0	aya,,,,
NF1	Melanoma	factor(aya_status)1	-1.32263	0.258477	-5.11701	3.10412e-07	0.000132677	17	211	604	1936	7.36852e-10	3.51724e-07	0.0745614	0.237795	0	aya,histological subtype,,,
ALK	Melanoma	factor(aya_status)1	-1.32235	0.367075	-3.60241	0.000315286	0.0369426	8	223	299	2269	3.64694e-05	0.00614402	0.034632	0.116433	0	aya,histological subtype,,,
PIK3CA	Cervical Cancer	factor(aya_status)1	-1.31607	0.333273	-3.94893	7.84998e-05	0.0129094	12	93	107	228	1.61884e-05	0.00295938	0.114286	0.319403	0	aya,,,,
ARID2	Melanoma	factor(aya_status)1	-1.30001	0.331344	-3.92345	8.72913e-05	0.0140636	10	205	346	2022	1.07493e-05	0.00218721	0.0465116	0.146115	0	aya,,,,
RUNX1	Breast Cancer	factor(aya_status)1	-1.28781	0.362286	-3.55467	0.000378459	0.041778	8	906	265	7456	2.99074e-06	0.000694499	0.00875274	0.034322	0	aya,,,,
MAP3K1	Breast Cancer	factor(aya_status)1	-1.25972	0.22052	-5.71249	1.11332e-08	6.79262e-06	22	892	615	7139	1.10978e-11	5.60898e-09	0.02407	0.0793139	0	aya,,,,
CBFB	Breast Cancer	factor(aya_status)1	-1.25657	0.325191	-3.86409	0.000111505	0.01676	10	796	292	6486	3.46856e-06	0.00078426	0.0124069	0.0430806	0	aya,,metastasis,,
KIT	Gastrointestinal Stromal Tumor	factor(aya_status)1	-1.25509	0.266937	-4.70182	2.57848e-06	0.000784277	32	32	601	164	1.83305e-06	0.000463223	0.5	0.785621	0	aya,,,,
TBX3	Breast Cancer	factor(aya_status)1	-1.23328	0.342416	-3.6017	0.000316142	0.0370008	9	664	328	5506	6.36305e-08	2.32935e-05	0.013373	0.0562221	0	aya,,,,
CARD11	Melanoma	factor(aya_status)1	-1.20074	0.34899	-3.44062	0.000580384	0.057487	9	206	284	2086	0.000184803	0.0244282	0.0418605	0.119831	0	,,,,undetermined
TP53	Pancreatic Cancer	factor(aya_status)1	-1.16325	0.25668	-4.53192	5.84509e-06	0.00153748	27	78	2198	1191	1.6797e-15	1.312e-12	0.257143	0.648569	0	aya,histological subtype,,,
PTEN	Glioma	factor(aya_status)1	-1.12083	0.141044	-7.94665	1.91628e-15	3.29316e-12	64	978	1073	2438	6.73253e-70	1.9282e-66	0.0614203	0.305611	0	aya,histological subtype,,,
NOTCH3	Melanoma	factor(aya_status)1	-1.09556	0.333721	-3.28285	0.00102762	0.0870657	10	186	315	1908	0.000115104	0.0162127	0.0510204	0.1417	0	,histological subtype,,sex,
PTPRT	Melanoma	factor(aya_status)1	-1.07186	0.279065	-3.8409	0.000122586	0.0178783	16	122	382	1115	0.000163976	0.0222245	0.115942	0.255177	0	aya,histological subtype,,,
TP53	Ovarian Cancer	factor(aya_status)1	-1.03658	0.289113	-3.58536	0.000336611	0.0386243	35	113	2159	666	3.37663e-39	5.8024e-36	0.236486	0.764248	0	aya,histological subtype,,,
EGFR	Glioma	factor(aya_status)1	-0.985283	0.154305	-6.38528	1.71085e-10	1.57506e-07	52	1005	628	2929	1.94988e-29	2.39334e-26	0.0491958	0.176553	0	aya,histological subtype,,,
GRIN2A	Melanoma	factor(aya_status)1	-0.957445	0.269526	-3.55233	0.00038183	0.0419732	17	141	395	1337	0.000259926	0.0319041	0.107595	0.22806	0	aya,histological subtype,,sex,
ROS1	Melanoma	factor(aya_status)1	-0.932981	0.22882	-4.07736	4.55491e-05	0.00822548	23	199	544	1916	1.52012e-05	0.00290241	0.103604	0.221138	0	aya,,,,
KMT2C	Breast Cancer	factor(aya_status)1	-0.927904	0.218477	-4.24714	2.16513e-05	0.00456541	23	630	510	5123	1.60312e-07	4.91928e-05	0.0352221	0.0905379	0	aya,,,,
KRAS	Cancer of Unknown Primary	factor(aya_status)1	-0.919075	0.314379	-2.92346	0.00346164	0.20326	12	126	476	1827	0.000275957	0.0329308	0.0869565	0.206687	0	,histological subtype,,,
ERBB4	Melanoma	factor(aya_status)1	-0.843187	0.243123	-3.46815	0.000524058	0.0532376	20	211	444	2124	0.00041565	0.0457854	0.0865801	0.172897	0	,histological subtype,,,
KMT2D	Melanoma	factor(aya_status)1	-0.78196	0.225781	-3.46335	0.000533491	0.0538749	24	191	506	1906	0.00036225	0.0414994	0.111628	0.209784	0	,histological subtype,,,
NRAS	Melanoma	factor(aya_status)1	-0.765649	0.198866	-3.85007	0.000118083	0.0173786	32	199	631	1938	0.000138388	0.0191779	0.138528	0.245621	0	aya,,,,
PIK3CA	Breast Cancer	factor(aya_status)1	-0.748732	0.0861506	-8.69096	3.59378e-18	8.82281e-15	186	729	2857	4919	2.02686e-24	2.17685e-21	0.203279	0.367413	0	aya,,,,
ATRX	Soft Tissue Sarcoma	factor(aya_status)1	-0.746222	0.269538	-2.76852	0.00563117	0.275967	17	552	176	1588	1.27678e-08	5.22383e-06	0.029877	0.0997732	0	,,,,undetermined
PTPN11	Glioma	factor(aya_status)1	-0.711672	0.240016	-2.9651	0.00302589	0.186048	21	1021	189	3322	1.24693e-06	0.000324655	0.0201536	0.0538308	0	,,,,undetermined
TP53	Thyroid Cancer	factor(aya_status)1	-0.69218	0.460181	-1.50415	0.132543	1	6	193	145	914	2.38402e-06	0.000568986	0.0301508	0.136922	0	,histological subtype,,,
BRAF	Thyroid Cancer	factor(aya_status)1	-0.688401	0.183002	-3.76172	0.000168751	0.0228647	75	124	476	583	0.0618084	0.920377	0.376884	0.449481	0	aya,histological subtype,,,
TP53	Skin Cancer, Non-Melanoma	factor(aya_status)1	-0.675163	0.629199	-1.07305	0.283248	1	5	26	364	312	3.00582e-05	0.0051652	0.16129	0.538462	0	,,,,undetermined
STAG2	Glioma	factor(aya_status)1	-0.640703	0.264567	-2.4217	0.0154479	0.505505	17	1018	176	3330	3.9651e-07	0.000109897	0.0164251	0.0501997	0	,,,,undetermined
TP53	Hepatobiliary Cancer	factor(aya_status)1	-0.601083	0.292947	-2.05185	0.0401841	0.81831	16	96	549	1011	2.30301e-06	0.000565357	0.142857	0.351923	0	,histological subtype,,,
TP53	Cancer of Unknown Primary	factor(aya_status)1	-0.562227	0.193353	-2.90778	0.00364005	0.210859	46	92	1137	1159	0.00021582	0.0276226	0.333333	0.495209	0	,histological subtype,,,
KRAS	Ovarian Cancer	factor(aya_status)1	-0.548161	0.261613	-2.09532	0.0361429	0.783138	36	112	224	2603	4.15606e-09	1.78544e-06	0.243243	0.0792359	1	,histological subtype,,,
RB1	Soft Tissue Sarcoma	factor(aya_status)1	-0.475491	0.300941	-1.58001	0.114104	1	14	555	123	1646	2.22569e-05	0.00398399	0.0246046	0.0695308	0	,,,,undetermined
NF1	Glioma	factor(aya_status)1	-0.347685	0.119178	-2.91736	0.00353012	0.206229	100	953	598	2955	1.48595e-09	6.71963e-07	0.0949668	0.168308	0	,histological subtype,,,
TP53	Endometrial Cancer	factor(aya_status)1	-0.339885	0.34192	-0.99405	0.320199	1	15	48	1285	1498	0.000459133	0.049935	0.238095	0.461732	0	,histological subtype,,,
TP53	Soft Tissue Sarcoma	factor(aya_status)1	-0.252479	0.155441	-1.62428	0.104316	1	73	496	474	1295	1.12523e-12	6.44529e-10	0.128295	0.267948	0	,,,,undetermined
PIK3R1	Glioma	factor(aya_status)1	-0.24296	0.151591	-1.60273	0.108994	1	61	974	339	3167	0.000105032	0.0150406	0.0589372	0.0966914	0	,histological subtype,,,
VHL	Renal Cell Carcinoma	factor(aya_status)1	-0.159805	0.296205	-0.539506	0.589538	1	36	96	700	679	2.282e-07	6.53563e-05	0.272727	0.507614	0	,,,,undetermined
BRAF	Glioma	factor(aya_status)1	0.0950531	0.157558	0.603289	0.546316	1	78	979	118	3439	7.31165e-08	2.51287e-05	0.0737938	0.033174	1	,histological subtype,,,
SMARCA4	Ovarian Cancer	factor(aya_status)1	0.21313	0.471834	0.451706	0.651481	1	12	136	66	2751	0.00038189	0.0431737	0.0810811	0.0234292	1	,histological subtype,,,
GATA3	Breast Cancer	factor(aya_status)1	0.336949	0.0932629	3.6129	0.000302791	0.0359276	167	747	979	6775	5.12012e-06	0.00112198	0.182713	0.126257	1	aya,,,,
CDH1	Esophagogastric Cancer	factor(aya_status)1	0.355644	0.259443	1.3708	0.170437	1	26	110	207	2105	0.000402338	0.0448947	0.191176	0.0895329	1	,histological subtype,,sex,
TP53	Breast Cancer	factor(aya_status)1	0.376121	0.071481	5.26183	1.42628e-07	6.84025e-05	481	433	3134	4623	2.34657e-12	1.26011e-09	0.526258	0.404022	1	aya,histological subtype,,sex,
BRAF	Melanoma	factor(aya_status)1	0.516004	0.147972	3.48716	0.000488177	0.0505894	105	126	833	1736	8.12879e-05	0.0122531	0.454545	0.324251	1	,histological subtype,,,
CTNNB1	Soft Tissue Sarcoma	factor(aya_status)1	0.627428	0.351368	1.78567	0.0741522	1	29	541	28	1742	1.26784e-05	0.00247575	0.0508772	0.0158192	1	,histological subtype,,,
NF1	Colorectal Cancer	factor(aya_status)1	0.680444	0.144162	4.72	2.3584e-06	0.000728385	64	643	314	6275	6.3746e-06	0.00133587	0.0905233	0.0476552	1	aya,,,,
MSH2	Colorectal Cancer	factor(aya_status)1	0.707355	0.182407	3.87789	0.000105365	0.0161438	39	649	177	6028	0.000196048	0.0255219	0.056686	0.0285254	1	aya,,,,
IDH2	Glioma	factor(aya_status)1	0.75878	0.210458	3.60538	0.000311699	0.036689	45	1010	62	3495	1.09462e-05	0.00218721	0.042654	0.0174304	1	aya,histological subtype,,,
B2M	Mature B-Cell Neoplasms	factor(aya_status)1	0.886568	0.372677	2.37892	0.0173636	0.539433	12	55	41	806	0.000218614	0.0276226	0.179104	0.0484061	1	,histological subtype,,,
KDM5A	Glioma	factor(aya_status)1	1.00313	0.255327	3.92882	8.53625e-05	0.0139049	27	813	51	2791	0.0194247	0.598875	0.0321429	0.0179451	1	aya,,,,
SDHA	Glioma	factor(aya_status)1	1.01193	0.275507	3.67298	0.000239735	0.0300809	25	782	39	2920	0.00111073	0.0955172	0.0309789	0.0131801	1	aya,,,,
AKT3	Colorectal Cancer	factor(aya_status)1	1.02151	0.248076	4.11775	3.82597e-05	0.00725184	22	666	73	6132	0.000165546	0.0222245	0.0319767	0.0117647	1	aya,,,,
SOCS1	Mature B-Cell Neoplasms	factor(aya_status)1	1.17139	0.310088	3.77761	0.000158339	0.0218853	20	52	55	800	1.43663e-07	4.57167e-05	0.277778	0.0643275	1	aya,histological subtype,,,
TP53	Glioma	factor(aya_status)1	1.32639	0.089576	14.8075	1.31069e-49	1.50163e-45	563	479	1127	2384	8.20228e-37	1.17457e-33	0.540307	0.320991	1	aya,histological subtype,,,
H3F3A	Glioma	factor(aya_status)1	1.42134	0.196023	7.25088	4.14086e-13	5.84888e-10	67	937	27	3360	8.32345e-24	7.94612e-21	0.0667331	0.00797166	1	aya,histological subtype,,,
WT1	Leukemia	factor(aya_status)1	1.42442	0.396748	3.59024	0.000330379	0.0382331	12	44	24	337	0.00107265	0.0955172	0.214286	0.066482	1	aya,,,,
PTCH1	Embryonal Tumor	factor(aya_status)1	1.46852	0.40543	3.62213	0.000292188	0.0349606	18	39	5	28	0.131504	1	0.315789	0.151515	1	aya,,,,
ATRX	Glioma	factor(aya_status)1	1.62913	0.0925986	17.5935	2.76497e-69	7.12746e-65	427	608	440	3066	8.88155e-84	3.81551e-80	0.41256	0.125499	1	aya,histological subtype,metastasis,,
CTNNB1	Endometrial Cancer	factor(aya_status)1	1.73116	0.281327	6.15353	7.57753e-10	6.25061e-07	37	26	454	2336	6.92977e-14	4.2529e-11	0.587302	0.162724	1	aya,histological subtype,metastasis,,
EP300	Hepatobiliary Cancer	factor(aya_status)1	1.74821	0.45988	3.80144	0.000143858	0.0204598	7	104	29	1515	0.00829376	0.391538	0.0630631	0.0187824	1	aya,,,,
IDH1	Glioma	factor(aya_status)1	1.86362	0.0981981	18.9782	2.58252e-80	2.66286e-75	588	469	667	2890	6.30256e-114	5.41516e-110	0.556291	0.187518	1	aya,histological subtype,metastasis,,
FH	Renal Cell Carcinoma	factor(aya_status)1	1.98702	0.483535	4.10935	3.96772e-05	0.0074656	10	121	18	1349	6.25122e-05	0.00994638	0.0763359	0.0131675	1	aya,,,,
SMO	Embryonal Tumor	factor(aya_status)1	2.69268	0.678314	3.96967	7.19727e-05	0.0119696	13	44	1	32	0.0145281	0.523434	0.22807	0.030303	1	aya,,,,
FBXW7	Embryonal Tumor	factor(aya_status)1	2.86968	0.726292	3.95114	7.77808e-05	0.0128116	12	45	0	33	0.00316322	0.198383	0.210526	0	1	aya,,,,
RB1	CNS Cancer	factor(aya_status)1	2.98852	0.85207	3.50737	0.000452565	0.0479101	7	80	1	350	6.69607e-05	0.0104605	0.0804598	0.002849	1	aya,,,,

## Sheet: Compare_original&TCGA
	GENIE																	TCGA
Gene	Cancer type	Factors	Estimate	Std..Error	z.value	P value	FDR	#AYA_mut	#AYA_wt	#OA_mut	#OA_wt	P value	FDR	AYA_rate	OA_rate	Higher_in_AYA	Significant Variables	gene	Cancer	AYA_mut	AYA_wt	OA_mut	OA_wt	AYA_rate	OA_rate	p
AKT3	Colorectal Cancer	factor(aya_status)1	1.02151	0.248076	4.11775	3.82597e-05	0.00725184	22	666	73	6132	0.000165546	0.0222245	0.0319767	0.0117647	1	aya,,,,	No match cancer type in TCGA	No match cancer type in TCGA	No match cancer type in TCGA	No match cancer type in TCGA	No match cancer type in TCGA	No match cancer type in TCGA	No match cancer type in TCGA	No match cancer type in TCGA	No match cancer type in TCGA
ALK	Melanoma	factor(aya_status)1	-1.32235	0.367075	-3.60241	0.000315286	0.0369426	8	223	299	2269	3.64694e-05	0.00614402	0.034632	0.116433	0	aya,histological subtype,,,	ALK	SKCM	2	57	43	360	0.0338983	0.1067	0.0981638
ARID2	Melanoma	factor(aya_status)1	-1.30001	0.331344	-3.92345	8.72913e-05	0.0140636	10	205	346	2022	1.07493e-05	0.00218721	0.0465116	0.146115	0	aya,,,,	ARID2	SKCM	6	53	54	349	0.101695	0.133995	0.677853
ATRX	Glioma	factor(aya_status)1	1.62913	0.0925986	17.5935	2.76497e-69	7.12746e-65	427	608	440	3066	8.88155e-84	3.81551e-80	0.41256	0.125499	1	aya,histological subtype,metastasis,,	ATRX	GBM,LGG	131	173	84	719	0.430921	0.104608	2.35996e-31
ATRX	Soft Tissue Sarcoma	factor(aya_status)1	-0.746222	0.269538	-2.76852	0.00563117	0.275967	17	552	176	1588	1.27678e-08	5.22383e-06	0.029877	0.0997732	0	,,,,undetermined	No match cancer type in TCGA	No match cancer type in TCGA	No match cancer type in TCGA	No match cancer type in TCGA	No match cancer type in TCGA	No match cancer type in TCGA	No match cancer type in TCGA	No match cancer type in TCGA	No match cancer type in TCGA
B2M	Mature B-Cell Neoplasms	factor(aya_status)1	0.886568	0.372677	2.37892	0.0173636	0.539433	12	55	41	806	0.000218614	0.0276226	0.179104	0.0484061	1	,histological subtype,,,	No match cancer type in TCGA	No match cancer type in TCGA	No match cancer type in TCGA	No match cancer type in TCGA	No match cancer type in TCGA	No match cancer type in TCGA	No match cancer type in TCGA	No match cancer type in TCGA	No match cancer type in TCGA
BRAF	Glioma	factor(aya_status)1	0.0950531	0.157558	0.603289	0.546316	1	78	979	118	3439	7.31165e-08	2.51287e-05	0.0737938	0.033174	1	,histological subtype,,,	BRAF	GBM,LGG	4	300	6	797	0.0131579	0.00747198	0.475362
BRAF	Melanoma	factor(aya_status)1	0.516004	0.147972	3.48716	0.000488177	0.0505894	105	126	833	1736	8.12879e-05	0.0122531	0.454545	0.324251	1	,histological subtype,,,	BRAF	SKCM	41	18	194	209	0.694915	0.48139	0.0021686
BRAF	Thyroid Cancer	factor(aya_status)1	-0.688401	0.183002	-3.76172	0.000168751	0.0228647	75	124	476	583	0.0618084	0.920377	0.376884	0.449481	0	aya,histological subtype,,,	BRAF	THCA	100	80	189	136	0.555556	0.581538	0.574734
CARD11	Melanoma	factor(aya_status)1	-1.20074	0.34899	-3.44062	0.000580384	0.057487	9	206	284	2086	0.000184803	0.0244282	0.0418605	0.119831	0	,,,,undetermined	CARD11	SKCM	4	55	47	356	0.0677966	0.116625	0.372982
CBFB	Breast Cancer	factor(aya_status)1	-1.25657	0.325191	-3.86409	0.000111505	0.01676	10	796	292	6486	3.46856e-06	0.00078426	0.0124069	0.0430806	0	aya,,metastasis,,	CBFB	BRCA	2	74	16	1007	0.0263158	0.0156403	0.357099
CDH1	Breast Cancer	factor(aya_status)1	-1.84684	0.296352	-6.23192	4.60745e-10	3.86243e-07	14	900	1165	6591	5.71349e-42	1.22726e-38	0.0153173	0.150206	0	aya,histological subtype,,,	CDH1	BRCA	1	75	101	922	0.0131579	0.0987292	0.00707217
CDH1	Esophagogastric Cancer	factor(aya_status)1	0.355644	0.259443	1.3708	0.170437	1	26	110	207	2105	0.000402338	0.0448947	0.191176	0.0895329	1	,histological subtype,,sex,	No match cancer type in TCGA	No match cancer type in TCGA	No match cancer type in TCGA	No match cancer type in TCGA	No match cancer type in TCGA	No match cancer type in TCGA	No match cancer type in TCGA	No match cancer type in TCGA	No match cancer type in TCGA
CDKN2A	Soft Tissue Sarcoma	factor(aya_status)1	-2.79078	1.02713	-2.71705	0.00658664	0.303824	1	568	45	1724	7.39215e-05	0.0113417	0.00175747	0.0254381	0	,,,,undetermined	No match cancer type in TCGA	No match cancer type in TCGA	No match cancer type in TCGA	No match cancer type in TCGA	No match cancer type in TCGA	No match cancer type in TCGA	No match cancer type in TCGA	No match cancer type in TCGA	No match cancer type in TCGA
CTNNB1	Endometrial Cancer	factor(aya_status)1	1.73116	0.281327	6.15353	7.57753e-10	6.25061e-07	37	26	454	2336	6.92977e-14	4.2529e-11	0.587302	0.162724	1	aya,histological subtype,metastasis,,	No match cancer type in TCGA	No match cancer type in TCGA	No match cancer type in TCGA	No match cancer type in TCGA	No match cancer type in TCGA	No match cancer type in TCGA	No match cancer type in TCGA	No match cancer type in TCGA	No match cancer type in TCGA
CTNNB1	Soft Tissue Sarcoma	factor(aya_status)1	0.627428	0.351368	1.78567	0.0741522	1	29	541	28	1742	1.26784e-05	0.00247575	0.0508772	0.0158192	1	,histological subtype,,,	No match cancer type in TCGA	No match cancer type in TCGA	No match cancer type in TCGA	No match cancer type in TCGA	No match cancer type in TCGA	No match cancer type in TCGA	No match cancer type in TCGA	No match cancer type in TCGA	No match cancer type in TCGA
EGFR	Glioma	factor(aya_status)1	-0.985283	0.154305	-6.38528	1.71085e-10	1.57506e-07	52	1005	628	2929	1.94988e-29	2.39334e-26	0.0491958	0.176553	0	aya,histological subtype,,,	EGFR	GBM,LGG	7	297	100	703	0.0230263	0.124533	2.0353e-08
EGFR	Melanoma	factor(aya_status)1	-3.02575	1.00554	-3.00907	0.00262045	0.168662	1	230	211	2357	1.84716e-07	5.47269e-05	0.004329	0.0821651	0	,,,,undetermined	EGFR	SKCM	5	54	26	377	0.0847458	0.0645161	0.575562
EP300	Hepatobiliary Cancer	factor(aya_status)1	1.74821	0.45988	3.80144	0.000143858	0.0204598	7	104	29	1515	0.00829376	0.391538	0.0630631	0.0187824	1	aya,,,,	No match cancer type in TCGA	No match cancer type in TCGA	No match cancer type in TCGA	No match cancer type in TCGA	No match cancer type in TCGA	No match cancer type in TCGA	No match cancer type in TCGA	No match cancer type in TCGA	No match cancer type in TCGA
ERBB2	Melanoma	factor(aya_status)1	-2.45416	1.00735	-2.43625	0.0148405	0.493301	1	230	124	2444	0.000359609	0.0414994	0.004329	0.0482866	0	,,,,undetermined	ERBB2	SKCM	3	56	9	394	0.0508475	0.0223325	0.188373
ERBB4	Melanoma	factor(aya_status)1	-0.843187	0.243123	-3.46815	0.000524058	0.0532376	20	211	444	2124	0.00041565	0.0457854	0.0865801	0.172897	0	,histological subtype,,,	ERBB4	SKCM	3	56	73	330	0.0508475	0.181141	0.00832579
FBXW7	Embryonal Tumor	factor(aya_status)1	2.86968	0.726292	3.95114	7.77808e-05	0.0128116	12	45	0	33	0.00316322	0.198383	0.210526	0	1	aya,,,,	No match cancer type in TCGA	No match cancer type in TCGA	No match cancer type in TCGA	No match cancer type in TCGA	No match cancer type in TCGA	No match cancer type in TCGA	No match cancer type in TCGA	No match cancer type in TCGA	No match cancer type in TCGA
FH	Renal Cell Carcinoma	factor(aya_status)1	1.98702	0.483535	4.10935	3.96772e-05	0.0074656	10	121	18	1349	6.25122e-05	0.00994638	0.0763359	0.0131675	1	aya,,,,	No match cancer type in TCGA	No match cancer type in TCGA	No match cancer type in TCGA	No match cancer type in TCGA	No match cancer type in TCGA	No match cancer type in TCGA	No match cancer type in TCGA	No match cancer type in TCGA	No match cancer type in TCGA
FLT1	Melanoma	factor(aya_status)1	-1.41219	0.367758	-3.83999	0.000123039	0.0178941	8	207	327	2085	5.22337e-06	0.00112198	0.0372093	0.135572	0	aya,,,,	FLT1	SKCM	5	54	38	365	0.0847458	0.0942928	1
FOXA1	Breast Cancer	factor(aya_status)1	-1.46586	0.386099	-3.79659	0.000146701	0.0207782	7	755	283	5971	6.50656e-08	2.32935e-05	0.00918635	0.045251	0	aya,,,,	FOXA1	BRCA	0	76	28	995	0	0.0273705	0.253186
GATA3	Breast Cancer	factor(aya_status)1	0.336949	0.0932629	3.6129	0.000302791	0.0359276	167	747	979	6775	5.12012e-06	0.00112198	0.182713	0.126257	1	aya,,,,	GATA3	BRCA	12	64	85	938	0.157895	0.083089	0.0350088
GRIN2A	Breast Cancer	factor(aya_status)1	-15.5885	411.268	-0.0379035	0.969765	1	0	673	107	5646	1.60159e-05	0.00295938	0	0.018599	0	,,,,undetermined	GRIN2A	BRCA	3	73	14	1009	0.0394737	0.0136852	0.107264
GRIN2A	Melanoma	factor(aya_status)1	-0.957445	0.269526	-3.55233	0.00038183	0.0419732	17	141	395	1337	0.000259926	0.0319041	0.107595	0.22806	0	aya,histological subtype,,sex,	GRIN2A	SKCM	15	44	97	306	0.254237	0.240695	0.870898
H3F3A	Glioma	factor(aya_status)1	1.42134	0.196023	7.25088	4.14086e-13	5.84888e-10	67	937	27	3360	8.32345e-24	7.94612e-21	0.0667331	0.00797166	1	aya,histological subtype,,,	H3F3A	GBM,LGG	4	300	1	802	0.0131579	0.00124533	0.0219311
IDH1	Glioma	factor(aya_status)1	1.86362	0.0981981	18.9782	2.58252e-80	2.66286e-75	588	469	667	2890	6.30256e-114	5.41516e-110	0.556291	0.187518	1	aya,histological subtype,metastasis,,	IDH1	GBM,LGG	213	91	198	605	0.700658	0.246575	1.7785e-43
IDH2	Glioma	factor(aya_status)1	0.75878	0.210458	3.60538	0.000311699	0.036689	45	1010	62	3495	1.09462e-05	0.00218721	0.042654	0.0174304	1	aya,histological subtype,,,	IDH2	GBM,LGG	13	291	9	794	0.0427632	0.011208	0.00242805
KDM5A	Glioma	factor(aya_status)1	1.00313	0.255327	3.92882	8.53625e-05	0.0139049	27	813	51	2791	0.0194247	0.598875	0.0321429	0.0179451	1	aya,,,,	KDM5A	GBM,LGG	2	302	3	800	0.00657895	0.00373599	0.619244
KEAP1	Cancer of Unknown Primary	factor(aya_status)1	-2.33719	1.0085	-2.31749	0.0204772	0.59085	1	136	183	2044	0.000227944	0.028384	0.00729927	0.0821733	0	,,,,undetermined	No match cancer type in TCGA	No match cancer type in TCGA	No match cancer type in TCGA	No match cancer type in TCGA	No match cancer type in TCGA	No match cancer type in TCGA	No match cancer type in TCGA	No match cancer type in TCGA	No match cancer type in TCGA
KEAP1	Non-Small Cell Lung Cancer	factor(aya_status)1	-2.53804	0.713417	-3.55758	0.000374286	0.0415425	2	159	1408	8514	1.47127e-08	5.74597e-06	0.0124224	0.141907	0	aya,,metastasis,sex,	No match cancer type in TCGA	No match cancer type in TCGA	No match cancer type in TCGA	No match cancer type in TCGA	No match cancer type in TCGA	No match cancer type in TCGA	No match cancer type in TCGA	No match cancer type in TCGA	No match cancer type in TCGA
KIT	Gastrointestinal Stromal Tumor	factor(aya_status)1	-1.25509	0.266937	-4.70182	2.57848e-06	0.000784277	32	32	601	164	1.83305e-06	0.000463223	0.5	0.785621	0	aya,,,,	No match cancer type in TCGA	No match cancer type in TCGA	No match cancer type in TCGA	No match cancer type in TCGA	No match cancer type in TCGA	No match cancer type in TCGA	No match cancer type in TCGA	No match cancer type in TCGA	No match cancer type in TCGA
KIT	Melanoma	factor(aya_status)1	-1.68018	0.58885	-2.85332	0.00432644	0.234545	3	228	186	2383	9.64785e-05	0.0140499	0.012987	0.0724017	0	,histological subtype,,,	KIT	SKCM	0	59	21	382	0	0.0521092	0.0920514
KMT2C	Breast Cancer	factor(aya_status)1	-0.927904	0.218477	-4.24714	2.16513e-05	0.00456541	23	630	510	5123	1.60312e-07	4.91928e-05	0.0352221	0.0905379	0	aya,,,,	KMT2C	BRCA	3	73	74	949	0.0394737	0.0723363	0.356752
KMT2D	Melanoma	factor(aya_status)1	-0.78196	0.225781	-3.46335	0.000533491	0.0538749	24	191	506	1906	0.00036225	0.0414994	0.111628	0.209784	0	,histological subtype,,,	KMT2D	SKCM	12	47	52	351	0.20339	0.129032	0.155057
KRAS	Cancer of Unknown Primary	factor(aya_status)1	-0.919075	0.314379	-2.92346	0.00346164	0.20326	12	126	476	1827	0.000275957	0.0329308	0.0869565	0.206687	0	,histological subtype,,,	No match cancer type in TCGA	No match cancer type in TCGA	No match cancer type in TCGA	No match cancer type in TCGA	No match cancer type in TCGA	No match cancer type in TCGA	No match cancer type in TCGA	No match cancer type in TCGA	No match cancer type in TCGA
KRAS	Non-Small Cell Lung Cancer	factor(aya_status)1	-2.01671	0.344705	-5.85054	4.89978e-09	3.28066e-06	9	167	3329	8116	2.31392e-15	1.65676e-12	0.0511364	0.290869	0	aya,histological subtype,metastasis,sex,	No match cancer type in TCGA	No match cancer type in TCGA	No match cancer type in TCGA	No match cancer type in TCGA	No match cancer type in TCGA	No match cancer type in TCGA	No match cancer type in TCGA	No match cancer type in TCGA	No match cancer type in TCGA
KRAS	Ovarian Cancer	factor(aya_status)1	-0.548161	0.261613	-2.09532	0.0361429	0.783138	36	112	224	2603	4.15606e-09	1.78544e-06	0.243243	0.0792359	1	,histological subtype,,,	No match cancer type in TCGA	No match cancer type in TCGA	No match cancer type in TCGA	No match cancer type in TCGA	No match cancer type in TCGA	No match cancer type in TCGA	No match cancer type in TCGA	No match cancer type in TCGA	No match cancer type in TCGA
KRAS	Pancreatic Cancer	factor(aya_status)1	-1.61323	0.281809	-5.72455	1.03708e-08	6.40327e-06	36	71	2711	704	1.78208e-23	1.53116e-20	0.336449	0.793851	0	aya,histological subtype,,,	No match cancer type in TCGA	No match cancer type in TCGA	No match cancer type in TCGA	No match cancer type in TCGA	No match cancer type in TCGA	No match cancer type in TCGA	No match cancer type in TCGA	No match cancer type in TCGA	No match cancer type in TCGA
MAP3K1	Breast Cancer	factor(aya_status)1	-1.25972	0.22052	-5.71249	1.11332e-08	6.79262e-06	22	892	615	7139	1.10978e-11	5.60898e-09	0.02407	0.0793139	0	aya,,,,	MAP3K1	BRCA	1	75	65	958	0.0131579	0.0635386	0.0800464
MEN1	Pancreatic Cancer	factor(aya_status)1	-1.58071	0.427992	-3.69331	0.000221351	0.0283525	7	96	185	3184	0.511115	1	0.0679612	0.0549124	1	aya,histological subtype,,,	No match cancer type in TCGA	No match cancer type in TCGA	No match cancer type in TCGA	No match cancer type in TCGA	No match cancer type in TCGA	No match cancer type in TCGA	No match cancer type in TCGA	No match cancer type in TCGA	No match cancer type in TCGA
MSH2	Colorectal Cancer	factor(aya_status)1	0.707355	0.182407	3.87789	0.000105365	0.0161438	39	649	177	6028	0.000196048	0.0255219	0.056686	0.0285254	1	aya,,,,	No match cancer type in TCGA	No match cancer type in TCGA	No match cancer type in TCGA	No match cancer type in TCGA	No match cancer type in TCGA	No match cancer type in TCGA	No match cancer type in TCGA	No match cancer type in TCGA	No match cancer type in TCGA
NF1	Colorectal Cancer	factor(aya_status)1	0.680444	0.144162	4.72	2.3584e-06	0.000728385	64	643	314	6275	6.3746e-06	0.00133587	0.0905233	0.0476552	1	aya,,,,	No match cancer type in TCGA	No match cancer type in TCGA	No match cancer type in TCGA	No match cancer type in TCGA	No match cancer type in TCGA	No match cancer type in TCGA	No match cancer type in TCGA	No match cancer type in TCGA	No match cancer type in TCGA
NF1	Glioma	factor(aya_status)1	-0.347685	0.119178	-2.91736	0.00353012	0.206229	100	953	598	2955	1.48595e-09	6.71963e-07	0.0949668	0.168308	0	,histological subtype,,,	NF1	GBM,LGG	12	292	53	750	0.0394737	0.0660025	0.114454
NF1	Melanoma	factor(aya_status)1	-1.32263	0.258477	-5.11701	3.10412e-07	0.000132677	17	211	604	1936	7.36852e-10	3.51724e-07	0.0745614	0.237795	0	aya,histological subtype,,,	NF1	SKCM	1	58	68	335	0.0169492	0.168734	0.000702614
NOTCH3	Melanoma	factor(aya_status)1	-1.09556	0.333721	-3.28285	0.00102762	0.0870657	10	186	315	1908	0.000115104	0.0162127	0.0510204	0.1417	0	,histological subtype,,sex,	NOTCH3	SKCM	4	55	32	371	0.0677966	0.0794045	1
NRAS	Melanoma	factor(aya_status)1	-0.765649	0.198866	-3.85007	0.000118083	0.0173786	32	199	631	1938	0.000138388	0.0191779	0.138528	0.245621	0	aya,,,,	NRAS	SKCM	12	47	114	289	0.20339	0.282878	0.215148
PBRM1	Renal Cell Carcinoma	factor(aya_status)1	-2.00785	0.474167	-4.23448	2.29078e-05	0.00478146	5	124	403	884	5.86668e-14	3.87742e-11	0.0387597	0.313131	0	aya,histological subtype,,,	No match cancer type in TCGA	No match cancer type in TCGA	No match cancer type in TCGA	No match cancer type in TCGA	No match cancer type in TCGA	No match cancer type in TCGA	No match cancer type in TCGA	No match cancer type in TCGA	No match cancer type in TCGA
PIK3C2G	Melanoma	factor(aya_status)1	-1.47501	0.465061	-3.17165	0.00151577	0.11509	5	133	216	1366	0.000271413	0.0328448	0.0362319	0.136536	0	,,,sex,	PIK3C2G	SKCM	9	50	62	341	0.152542	0.153846	1
PIK3CA	Breast Cancer	factor(aya_status)1	-0.748732	0.0861506	-8.69096	3.59378e-18	8.82281e-15	186	729	2857	4919	2.02686e-24	2.17685e-21	0.203279	0.367413	0	aya,,,,	PIK3CA	BRCA	13	63	260	763	0.171053	0.254154	0.129467
PIK3CA	Cervical Cancer	factor(aya_status)1	-1.31607	0.333273	-3.94893	7.84998e-05	0.0129094	12	93	107	228	1.61884e-05	0.00295938	0.114286	0.319403	0	aya,,,,	PIK3CA	CESC	14	71	70	153	0.164706	0.313901	0.00971086
PIK3CA	Thyroid Cancer	factor(aya_status)1	-16.3912	741.052	-0.0221189	0.982353	1	0	199	58	1000	5.88852e-05	0.00954606	0	0.0548204	0	,histological subtype,,,	PIK3CA	THCA	1	179	2	323	0.00555556	0.00615385	1
PIK3R1	Glioma	factor(aya_status)1	-0.24296	0.151591	-1.60273	0.108994	1	61	974	339	3167	0.000105032	0.0150406	0.0589372	0.0966914	0	,histological subtype,,,	PIK3R1	GBM,LGG	9	295	47	756	0.0296053	0.0585305	0.063855
PTCH1	Embryonal Tumor	factor(aya_status)1	1.46852	0.40543	3.62213	0.000292188	0.0349606	18	39	5	28	0.131504	1	0.315789	0.151515	1	aya,,,,	No match cancer type in TCGA	No match cancer type in TCGA	No match cancer type in TCGA	No match cancer type in TCGA	No match cancer type in TCGA	No match cancer type in TCGA	No match cancer type in TCGA	No match cancer type in TCGA	No match cancer type in TCGA
PTEN	Glioma	factor(aya_status)1	-1.12083	0.141044	-7.94665	1.91628e-15	3.29316e-12	64	978	1073	2438	6.73253e-70	1.9282e-66	0.0614203	0.305611	0	aya,histological subtype,,,	PTEN	GBM,LGG	7	297	116	687	0.0230263	0.144458	1.66907e-10
PTPN11	Glioma	factor(aya_status)1	-0.711672	0.240016	-2.9651	0.00302589	0.186048	21	1021	189	3322	1.24693e-06	0.000324655	0.0201536	0.0538308	0	,,,,undetermined	PTPN11	GBM,LGG	5	299	11	792	0.0164474	0.0136986	0.778885
PTPRT	Melanoma	factor(aya_status)1	-1.07186	0.279065	-3.8409	0.000122586	0.0178783	16	122	382	1115	0.000163976	0.0222245	0.115942	0.255177	0	aya,histological subtype,,,	PTPRT	SKCM	15	44	103	300	0.254237	0.255583	1
RB1	CNS Cancer	factor(aya_status)1	2.98852	0.85207	3.50737	0.000452565	0.0479101	7	80	1	350	6.69607e-05	0.0104605	0.0804598	0.002849	1	aya,,,,	No match cancer type in TCGA	No match cancer type in TCGA	No match cancer type in TCGA	No match cancer type in TCGA	No match cancer type in TCGA	No match cancer type in TCGA	No match cancer type in TCGA	No match cancer type in TCGA	No match cancer type in TCGA
RB1	Soft Tissue Sarcoma	factor(aya_status)1	-0.475491	0.300941	-1.58001	0.114104	1	14	555	123	1646	2.22569e-05	0.00398399	0.0246046	0.0695308	0	,,,,undetermined	No match cancer type in TCGA	No match cancer type in TCGA	No match cancer type in TCGA	No match cancer type in TCGA	No match cancer type in TCGA	No match cancer type in TCGA	No match cancer type in TCGA	No match cancer type in TCGA	No match cancer type in TCGA
RBM10	Non-Small Cell Lung Cancer	factor(aya_status)1	-1.59358	0.585823	-2.72025	0.00652333	0.301897	3	137	885	7697	0.000359599	0.0414994	0.0214286	0.103123	0	,,metastasis,,	No match cancer type in TCGA	No match cancer type in TCGA	No match cancer type in TCGA	No match cancer type in TCGA	No match cancer type in TCGA	No match cancer type in TCGA	No match cancer type in TCGA	No match cancer type in TCGA	No match cancer type in TCGA
ROS1	Melanoma	factor(aya_status)1	-0.932981	0.22882	-4.07736	4.55491e-05	0.00822548	23	199	544	1916	1.52012e-05	0.00290241	0.103604	0.221138	0	aya,,,,	ROS1	SKCM	11	48	72	331	0.186441	0.17866	0.857019
RUNX1	Breast Cancer	factor(aya_status)1	-1.28781	0.362286	-3.55467	0.000378459	0.041778	8	906	265	7456	2.99074e-06	0.000694499	0.00875274	0.034322	0	aya,,,,	RUNX1	BRCA	0	76	32	991	0	0.0312805	0.161546
SDHA	Glioma	factor(aya_status)1	1.01193	0.275507	3.67298	0.000239735	0.0300809	25	782	39	2920	0.00111073	0.0955172	0.0309789	0.0131801	1	aya,,,,	SDHA	GBM,LGG	1	303	1	802	0.00328947	0.00124533	0.473998
SETD2	Renal Cell Carcinoma	factor(aya_status)1	-1.46116	0.470845	-3.10328	0.00191392	0.136571	5	127	287	1087	1.01494e-07	3.35397e-05	0.0378788	0.208879	0	,,metastasis,,	No match cancer type in TCGA	No match cancer type in TCGA	No match cancer type in TCGA	No match cancer type in TCGA	No match cancer type in TCGA	No match cancer type in TCGA	No match cancer type in TCGA	No match cancer type in TCGA	No match cancer type in TCGA
SMARCA4	Ovarian Cancer	factor(aya_status)1	0.21313	0.471834	0.451706	0.651481	1	12	136	66	2751	0.00038189	0.0431737	0.0810811	0.0234292	1	,histological subtype,,,	No match cancer type in TCGA	No match cancer type in TCGA	No match cancer type in TCGA	No match cancer type in TCGA	No match cancer type in TCGA	No match cancer type in TCGA	No match cancer type in TCGA	No match cancer type in TCGA	No match cancer type in TCGA
SMO	Embryonal Tumor	factor(aya_status)1	2.69268	0.678314	3.96967	7.19727e-05	0.0119696	13	44	1	32	0.0145281	0.523434	0.22807	0.030303	1	aya,,,,	No match cancer type in TCGA	No match cancer type in TCGA	No match cancer type in TCGA	No match cancer type in TCGA	No match cancer type in TCGA	No match cancer type in TCGA	No match cancer type in TCGA	No match cancer type in TCGA	No match cancer type in TCGA
SOCS1	Mature B-Cell Neoplasms	factor(aya_status)1	1.17139	0.310088	3.77761	0.000158339	0.0218853	20	52	55	800	1.43663e-07	4.57167e-05	0.277778	0.0643275	1	aya,histological subtype,,,	No match cancer type in TCGA	No match cancer type in TCGA	No match cancer type in TCGA	No match cancer type in TCGA	No match cancer type in TCGA	No match cancer type in TCGA	No match cancer type in TCGA	No match cancer type in TCGA	No match cancer type in TCGA
STAG2	Glioma	factor(aya_status)1	-0.640703	0.264567	-2.4217	0.0154479	0.505505	17	1018	176	3330	3.9651e-07	0.000109897	0.0164251	0.0501997	0	,,,,undetermined	STAG2	GBM,LGG	3	301	15	788	0.00986842	0.01868	0.426808
STK11	Non-Small Cell Lung Cancer	factor(aya_status)1	-1.85931	0.508071	-3.65955	0.000252659	0.0313123	4	164	1511	9431	6.66314e-07	0.000178905	0.0238095	0.138092	0	aya,,,sex,	No match cancer type in TCGA	No match cancer type in TCGA	No match cancer type in TCGA	No match cancer type in TCGA	No match cancer type in TCGA	No match cancer type in TCGA	No match cancer type in TCGA	No match cancer type in TCGA	No match cancer type in TCGA
TBX3	Breast Cancer	factor(aya_status)1	-1.23328	0.342416	-3.6017	0.000316142	0.0370008	9	664	328	5506	6.36305e-08	2.32935e-05	0.013373	0.0562221	0	aya,,,,	TBX3	BRCA	1	75	26	997	0.0131579	0.0254154	1
TET2	Mature T and NK Neoplasms	factor(aya_status)1	-17.4765	1229.42	-0.0142152	0.988658	1	0	25	60	111	9.10186e-05	0.0134833	0	0.350877	0	,histological subtype,,,	No match cancer type in TCGA	No match cancer type in TCGA	No match cancer type in TCGA	No match cancer type in TCGA	No match cancer type in TCGA	No match cancer type in TCGA	No match cancer type in TCGA	No match cancer type in TCGA	No match cancer type in TCGA
TP53	Breast Cancer	factor(aya_status)1	0.376121	0.071481	5.26183	1.42628e-07	6.84025e-05	481	433	3134	4623	2.34657e-12	1.26011e-09	0.526258	0.404022	1	aya,histological subtype,,sex,	TP53	BRCA	17	59	247	776	0.223684	0.241447	0.782477
TP53	Cancer of Unknown Primary	factor(aya_status)1	-0.562227	0.193353	-2.90778	0.00364005	0.210859	46	92	1137	1159	0.00021582	0.0276226	0.333333	0.495209	0	,histological subtype,,,	No match cancer type in TCGA	No match cancer type in TCGA	No match cancer type in TCGA	No match cancer type in TCGA	No match cancer type in TCGA	No match cancer type in TCGA	No match cancer type in TCGA	No match cancer type in TCGA	No match cancer type in TCGA
TP53	Endometrial Cancer	factor(aya_status)1	-0.339885	0.34192	-0.99405	0.320199	1	15	48	1285	1498	0.000459133	0.049935	0.238095	0.461732	0	,histological subtype,,,	No match cancer type in TCGA	No match cancer type in TCGA	No match cancer type in TCGA	No match cancer type in TCGA	No match cancer type in TCGA	No match cancer type in TCGA	No match cancer type in TCGA	No match cancer type in TCGA	No match cancer type in TCGA
TP53	Glioma	factor(aya_status)1	1.32639	0.089576	14.8075	1.31069e-49	1.50163e-45	563	479	1127	2384	8.20228e-37	1.17457e-33	0.540307	0.320991	1	aya,histological subtype,,,	TP53	GBM,LGG	162	142	177	626	0.532895	0.220423	1.35055e-22
TP53	Hepatobiliary Cancer	factor(aya_status)1	-0.601083	0.292947	-2.05185	0.0401841	0.81831	16	96	549	1011	2.30301e-06	0.000565357	0.142857	0.351923	0	,histological subtype,,,	No match cancer type in TCGA	No match cancer type in TCGA	No match cancer type in TCGA	No match cancer type in TCGA	No match cancer type in TCGA	No match cancer type in TCGA	No match cancer type in TCGA	No match cancer type in TCGA	No match cancer type in TCGA
TP53	Leukemia	factor(aya_status)1	-2.76547	1.01858	-2.71501	0.0066273	0.304554	1	59	79	295	4.83285e-05	0.00798536	0.0166667	0.21123	0	,,,,undetermined	No match cancer type in TCGA	No match cancer type in TCGA	No match cancer type in TCGA	No match cancer type in TCGA	No match cancer type in TCGA	No match cancer type in TCGA	No match cancer type in TCGA	No match cancer type in TCGA	No match cancer type in TCGA
TP53	Ovarian Cancer	factor(aya_status)1	-1.03658	0.289113	-3.58536	0.000336611	0.0386243	35	113	2159	666	3.37663e-39	5.8024e-36	0.236486	0.764248	0	aya,histological subtype,,,	No match cancer type in TCGA	No match cancer type in TCGA	No match cancer type in TCGA	No match cancer type in TCGA	No match cancer type in TCGA	No match cancer type in TCGA	No match cancer type in TCGA	No match cancer type in TCGA	No match cancer type in TCGA
TP53	Pancreatic Cancer	factor(aya_status)1	-1.16325	0.25668	-4.53192	5.84509e-06	0.00153748	27	78	2198	1191	1.6797e-15	1.312e-12	0.257143	0.648569	0	aya,histological subtype,,,	No match cancer type in TCGA	No match cancer type in TCGA	No match cancer type in TCGA	No match cancer type in TCGA	No match cancer type in TCGA	No match cancer type in TCGA	No match cancer type in TCGA	No match cancer type in TCGA	No match cancer type in TCGA
TP53	Salivary Gland Cancer	factor(aya_status)1	-2.75523	1.04204	-2.64408	0.00819126	0.349253	1	48	121	351	2.65399e-05	0.0046537	0.0204082	0.256356	0	,histological subtype,,,	No match cancer type in TCGA	No match cancer type in TCGA	No match cancer type in TCGA	No match cancer type in TCGA	No match cancer type in TCGA	No match cancer type in TCGA	No match cancer type in TCGA	No match cancer type in TCGA	No match cancer type in TCGA
TP53	Skin Cancer, Non-Melanoma	factor(aya_status)1	-0.675163	0.629199	-1.07305	0.283248	1	5	26	364	312	3.00582e-05	0.0051652	0.16129	0.538462	0	,,,,undetermined	No match cancer type in TCGA	No match cancer type in TCGA	No match cancer type in TCGA	No match cancer type in TCGA	No match cancer type in TCGA	No match cancer type in TCGA	No match cancer type in TCGA	No match cancer type in TCGA	No match cancer type in TCGA
TP53	Soft Tissue Sarcoma	factor(aya_status)1	-0.252479	0.155441	-1.62428	0.104316	1	73	496	474	1295	1.12523e-12	6.44529e-10	0.128295	0.267948	0	,,,,undetermined	No match cancer type in TCGA	No match cancer type in TCGA	No match cancer type in TCGA	No match cancer type in TCGA	No match cancer type in TCGA	No match cancer type in TCGA	No match cancer type in TCGA	No match cancer type in TCGA	No match cancer type in TCGA
TP53	Thyroid Cancer	factor(aya_status)1	-0.69218	0.460181	-1.50415	0.132543	1	6	193	145	914	2.38402e-06	0.000568986	0.0301508	0.136922	0	,histological subtype,,,	TP53	THCA	0	180	3	322	0	0.00923077	0.555847
VHL	Renal Cell Carcinoma	factor(aya_status)1	-0.159805	0.296205	-0.539506	0.589538	1	36	96	700	679	2.282e-07	6.53563e-05	0.272727	0.507614	0	,,,,undetermined	No match cancer type in TCGA	No match cancer type in TCGA	No match cancer type in TCGA	No match cancer type in TCGA	No match cancer type in TCGA	No match cancer type in TCGA	No match cancer type in TCGA	No match cancer type in TCGA	No match cancer type in TCGA
WT1	Leukemia	factor(aya_status)1	1.42442	0.396748	3.59024	0.000330379	0.0382331	12	44	24	337	0.00107265	0.0955172	0.214286	0.066482	1	aya,,,,	No match cancer type in TCGA	No match cancer type in TCGA	No match cancer type in TCGA	No match cancer type in TCGA	No match cancer type in TCGA	No match cancer type in TCGA	No match cancer type in TCGA	No match cancer type in TCGA	No match cancer type in TCGA

## Sheet: Compare_original&TMB_models
		original results															add TMB results
		Logistic model results						Fisher's test results									Logistic model results						Fisher's test results
Gene	Cancer	Factors	Estimate	Std..Error	z.value	P value	FDR	aya_mut	aya_wt	adult_mut	adult_wt	P value	murate_aya	murate_adult	Higher_AYA	FDR	Factors	Estimate	Std..Error	z.value	P value	FDR	aya_mut	aya_wt	adult_mut	adult_wt	P value	murate_aya	murate_adult	Higher_AYA	FDR	Significant Variables_original	Significant Variables_addTMB	Include_in_final_results
BRAF	Melanoma	factor(aya_status)1	0.516004	0.147972	3.48716	0.000488177	0.0505894	105	126	833	1736	8.12879e-05	0.454545	0.324251	1	0.0122531	factor(aya_status)1	0.49076	0.15548	3.15643	0.00159714	0.0274836	99	116	790	1622	0.000117088	0.460465	0.327529	1	0.0170095	,histological subtype,,,	aya,histological subtype,,,	1
SDHA	Gastrointestinal Stromal Tumor	factor(aya_status)1	1.82392	0.532616	3.42445	0.000616048	0.0595147	6	56	10	681	0.00102206	0.0967742	0.0144718	1	0.0924369	factor(aya_status)1	1.83534	0.536089	3.42358	0.000618021	0.0116138	6	56	10	681	0.00102206	0.0967742	0.0144718	1	0.0952178	NA	aya,,,,	1
FANCM	Breast Cancer	factor(aya_status)1	1.15334	0.341592	3.37638	0.000734475	0.0676787	13	164	35	1352	0.00174042	0.0734463	0.0252343	1	0.130032	factor(aya_status)1	1.19914	0.344659	3.4792	0.000502909	0.00962535	13	164	35	1352	0.00174042	0.0734463	0.0252343	1	0.136854	NA	aya,,,,TMB	1
TP53	Appendiceal Cancer	factor(aya_status)1	1.15983	0.344312	3.36854	0.000755669	0.0689538	22	19	99	264	0.000966646	0.536585	0.272727	1	0.0902763	factor(aya_status)1	1.21378	0.347739	3.49048	0.000482151	0.00925824	22	19	96	262	0.000880323	0.536585	0.268156	1	0.0875243	NA	aya,,,,	1
BRAF	Histiocytosis	factor(aya_status)1	-2.29128	0.749451	-3.05728	0.00223355	0.151915	3	27	13	41	0.151942	0.1	0.240741	0	1	factor(aya_status)1	-2.38831	0.792989	-3.01178	0.00259717	0.0425955	3	27	13	41	0.151942	0.1	0.240741	0	1	NA	aya,histological subtype,,,	1
GLI3	Non-Small Cell Lung Cancer	factor(aya_status)1	1.4855	0.493617	3.00943	0.0026174	0.168585	6	17	146	1669	0.00895323	0.26087	0.0804408	1	0.402755	factor(aya_status)1	1.9909	0.503806	3.95173	7.76e-05	0.00172581	6	17	146	1669	0.00895323	0.26087	0.0804408	1	0.403885	NA	aya,,,,TMB	1
FANCD2	Breast Cancer	factor(aya_status)1	0.884039	0.295407	2.99261	0.00276601	0.174973	16	269	57	2354	0.00336288	0.0561404	0.0236416	1	0.204921	factor(aya_status)1	0.926978	0.297497	3.11592	0.00183371	0.0311507	16	269	57	2354	0.00336288	0.0561404	0.0236416	1	0.211936	NA	aya,,,,TMB	1
PTPN11	Glioma	factor(aya_status)1	-0.711672	0.240016	-2.9651	0.00302589	0.186048	21	1021	189	3322	1.24693e-06	0.0201536	0.0538308	0	0.000324655	factor(aya_status)1	-0.90601	0.253957	-3.56758	0.000360298	0.00706812	21	1014	189	3317	1.25445e-06	0.0202899	0.0539076	0	0.000325816	,,,,undetermined	aya,,,,TMB	1
NF1	Glioma	factor(aya_status)1	-0.347685	0.119178	-2.91736	0.00353012	0.206229	100	953	598	2955	1.48595e-09	0.0949668	0.168308	0	6.71963e-07	factor(aya_status)1	-0.490906	0.128775	-3.81213	0.000137774	0.00292338	100	935	598	2908	1.85329e-09	0.0966184	0.170565	0	8.36028e-07	,histological subtype,,,	aya,histological subtype,,,TMB	1
BCL2	Mature B-Cell Neoplasms	factor(aya_status)1	-1.7565	0.617666	-2.84378	0.00445823	0.238306	3	69	107	748	0.0354711	0.0416667	0.125146	0	0.756248	factor(aya_status)1	-2.21667	0.7372	-3.00688	0.0026394	0.0432309	3	69	107	748	0.0354711	0.0416667	0.125146	0	0.760649	NA	aya,histological subtype,,,TMB	1
BRCA1	Breast Cancer	factor(aya_status)1	0.438537	0.179149	2.4479	0.0143693	0.4861	39	876	222	7551	0.0237676	0.042623	0.0285604	1	0.656628	factor(aya_status)1	0.602202	0.182065	3.30762	0.000940939	0.0169858	39	875	222	7532	0.0238909	0.0426696	0.0286304	1	0.671659	NA	aya,,,,TMB	1
STAG2	Glioma	factor(aya_status)1	-0.640703	0.264567	-2.4217	0.0154479	0.505505	17	1018	176	3330	3.9651e-07	0.0164251	0.0501997	0	0.000109897	factor(aya_status)1	-0.93655	0.29045	-3.22447	0.00126204	0.0222387	17	1018	176	3330	3.9651e-07	0.0164251	0.0501997	0	0.000113283	,,,,undetermined	aya,,,,TMB	1
TET2	Mature T and NK Neoplasms	factor(aya_status)1	-17.4765	1229.42	-0.0142152	0.988658	1	0	25	60	111	9.10186e-05	0	0.350877	0	0.0134833	factor(aya_status)1	-17.4719	1184.69	-0.0147481	0.988233	1	0	25	60	111	9.10186e-05	0	0.350877	0	0.0139307	,histological subtype,,,	,histological subtype,,,TMB	0
PIK3CA	Thyroid Cancer	factor(aya_status)1	-16.3912	741.052	-0.0221189	0.982353	1	0	199	58	1000	5.88852e-05	0	0.0548204	0	0.00954606	factor(aya_status)1	-16.3651	749.251	-0.0218419	0.982574	1	0	195	58	977	5.84133e-05	0	0.0560386	0	0.00981687	,histological subtype,,,	,histological subtype,,,	0
GRIN2A	Breast Cancer	factor(aya_status)1	-15.5885	411.268	-0.0379035	0.969765	1	0	673	107	5646	1.60159e-05	0	0.018599	0	0.00295938	factor(aya_status)1	-16.3743	670.914	-0.0244059	0.980529	1	0	673	107	5646	1.60159e-05	0	0.018599	0	0.00311982	,,,,undetermined	,,,,TMB	0
TP53	Salivary Gland Cancer	factor(aya_status)1	-2.75523	1.04204	-2.64408	0.00819126	0.349253	1	48	121	351	2.65399e-05	0.0204082	0.256356	0	0.0046537	factor(aya_status)1	-2.55615	1.03871	-2.46089	0.0138592	0.182098	1	48	121	351	2.65399e-05	0.0204082	0.256356	0	0.00473904	,histological subtype,,,	,histological subtype,,,	0
CDKN2A	Soft Tissue Sarcoma	factor(aya_status)1	-2.79078	1.02713	-2.71705	0.00658664	0.303824	1	568	45	1724	7.39215e-05	0.00175747	0.0254381	0	0.0113417	factor(aya_status)1	-2.56856	1.03416	-2.48372	0.0130018	0.172807	1	568	44	1720	7.08456e-05	0.00175747	0.0249433	0	0.0110403	,,,,undetermined	,,,,TMB	0
IDH1	Glioma	factor(aya_status)1	1.86362	0.0981981	18.9782	2.58252e-80	2.66286e-75	588	469	667	2890	6.30256e-114	0.556291	0.187518	1	5.41516e-110	factor(aya_status)1	1.88566	0.10003	18.851	2.88253e-79	8.45984e-76	582	453	660	2846	1.18713e-114	0.562319	0.188249	1	1.01749e-110	aya,histological subtype,metastasis,,	aya,histological subtype,metastasis,,TMB	0
TP53	Leukemia	factor(aya_status)1	-2.76547	1.01858	-2.71501	0.0066273	0.304554	1	59	79	295	4.83285e-05	0.0166667	0.21123	0	0.00798536	factor(aya_status)1	-17.1842	1012.77	-0.0169676	0.986462	1	0	40	51	213	0.000493792	0	0.193182	0	0.0545338	,,,,undetermined	NA	0
KEAP1	Cancer of Unknown Primary	factor(aya_status)1	-2.33719	1.0085	-2.31749	0.0204772	0.59085	1	136	183	2044	0.000227944	0.00729927	0.0821733	0	0.028384	factor(aya_status)1	-3.78604	1.65966	-2.28122	0.0225355	0.269548	1	136	183	2044	0.000227944	0.00729927	0.0821733	0	0.0296017	,,,,undetermined	,,,,TMB	0
ERBB2	Melanoma	factor(aya_status)1	-2.45416	1.00735	-2.43625	0.0148405	0.493301	1	230	124	2444	0.000359609	0.004329	0.0482866	0	0.0414994	factor(aya_status)1	-2.45376	1.09476	-2.24138	0.0250016	0.29243	1	214	120	2292	0.000530016	0.00465116	0.0497512	0	0.0560835	,,,,undetermined	NA	0
EGFR	Melanoma	factor(aya_status)1	-3.02575	1.00554	-3.00907	0.00262045	0.168662	1	230	211	2357	1.84716e-07	0.004329	0.0821651	0	5.47269e-05	factor(aya_status)1	-3.47429	1.27462	-2.72574	0.00641583	0.094409	1	214	202	2210	6.77693e-07	0.00465116	0.0837479	0	0.000187371	,,,,undetermined	,,,,TMB	0
ATRX	Glioma	factor(aya_status)1	1.62913	0.0925986	17.5935	2.76497e-69	7.12746e-65	427	608	440	3066	8.88155e-84	0.41256	0.125499	1	3.81551e-80	factor(aya_status)1	1.65746	0.0952698	17.3975	8.61965e-68	1.45652e-64	427	608	440	3066	8.88155e-84	0.41256	0.125499	1	3.80619e-80	aya,histological subtype,metastasis,,	aya,histological subtype,,,TMB	0
TP53	Glioma	factor(aya_status)1	1.32639	0.089576	14.8075	1.31069e-49	1.50163e-45	563	479	1127	2384	8.20228e-37	0.540307	0.320991	1	1.17457e-33	factor(aya_status)1	1.35625	0.0921423	14.7191	4.85846e-49	3.76277e-46	562	473	1124	2382	1.22763e-37	0.542995	0.320593	1	1.75368e-34	aya,histological subtype,,,	aya,histological subtype,,,TMB	0
PIK3CA	Breast Cancer	factor(aya_status)1	-0.748732	0.0861506	-8.69096	3.59378e-18	8.82281e-15	186	729	2857	4919	2.02686e-24	0.203279	0.367413	0	2.17685e-21	factor(aya_status)1	-0.688347	0.0871352	-7.89975	2.79456e-15	1.90853e-13	186	728	2851	4903	1.94674e-24	0.203501	0.367681	0	2.08569e-21	aya,,,,	aya,,,,TMB	0
PTEN	Glioma	factor(aya_status)1	-1.12083	0.141044	-7.94665	1.91628e-15	3.29316e-12	64	978	1073	2438	6.73253e-70	0.0614203	0.305611	0	1.9282e-66	factor(aya_status)1	-1.20965	0.145816	-8.29575	1.07901e-16	8.07626e-15	61	974	1070	2436	3.62218e-71	0.0589372	0.305191	0	1.03486e-67	aya,histological subtype,,,	aya,histological subtype,,,TMB	0
H3F3A	Glioma	factor(aya_status)1	1.42134	0.196023	7.25088	4.14086e-13	5.84888e-10	67	937	27	3360	8.32345e-24	0.0667331	0.00797166	1	7.94612e-21	factor(aya_status)1	1.41916	0.197483	7.18626	6.65901e-13	3.84791e-11	66	934	26	3357	8.80411e-24	0.066	0.00768549	1	8.38445e-21	aya,histological subtype,,,	aya,histological subtype,,,	0
EGFR	Glioma	factor(aya_status)1	-0.985283	0.154305	-6.38528	1.71085e-10	1.57506e-07	52	1005	628	2929	1.94988e-29	0.0491958	0.176553	0	2.39334e-26	factor(aya_status)1	-1.12664	0.163077	-6.90865	4.89284e-12	2.66183e-10	52	983	624	2882	9.26877e-29	0.0502415	0.177981	0	1.1349e-25	aya,histological subtype,,,	aya,histological subtype,,,TMB	0
CDH1	Breast Cancer	factor(aya_status)1	-1.84684	0.296352	-6.23192	4.60745e-10	3.86243e-07	14	900	1165	6591	5.71349e-42	0.0153173	0.150206	0	1.22726e-38	factor(aya_status)1	-1.77628	0.297656	-5.96756	2.40833e-09	1.02359e-07	14	900	1165	6589	5.75822e-42	0.0153173	0.150245	0	1.23384e-38	aya,histological subtype,,,	aya,histological subtype,,,TMB	0
CTNNB1	Endometrial Cancer	factor(aya_status)1	1.73116	0.281327	6.15353	7.57753e-10	6.25061e-07	37	26	454	2336	6.92977e-14	0.587302	0.162724	1	4.2529e-11	factor(aya_status)1	1.75643	0.283337	6.1991	5.67876e-10	2.56926e-08	37	26	454	2329	7.50201e-14	0.587302	0.163133	1	4.59284e-11	aya,histological subtype,metastasis,,	aya,histological subtype,metastasis,,TMB	0
KRAS	Non-Small Cell Lung Cancer	factor(aya_status)1	-2.01671	0.344705	-5.85054	4.89978e-09	3.28066e-06	9	167	3329	8116	2.31392e-15	0.0511364	0.290869	0	1.65676e-12	factor(aya_status)1	-1.97682	0.365628	-5.40664	6.42171e-08	2.34123e-06	8	157	2988	7446	1.57205e-14	0.0484848	0.286371	0	1.12284e-11	aya,histological subtype,metastasis,sex,	aya,histological subtype,metastasis,sex,TMB	0
KRAS	Pancreatic Cancer	factor(aya_status)1	-1.61323	0.281809	-5.72455	1.03708e-08	6.40327e-06	36	71	2711	704	1.78208e-23	0.336449	0.793851	0	1.53116e-20	factor(aya_status)1	-1.55579	0.295394	-5.26682	1.38806e-07	4.84517e-06	34	69	2672	697	3.83288e-23	0.330097	0.793114	0	3.28516e-20	aya,histological subtype,,,	aya,histological subtype,,,TMB	0
MAP3K1	Breast Cancer	factor(aya_status)1	-1.25972	0.22052	-5.71249	1.11332e-08	6.79262e-06	22	892	615	7139	1.10978e-11	0.02407	0.0793139	0	5.60898e-09	factor(aya_status)1	-1.19042	0.221071	-5.3848	7.2527e-08	2.62275e-06	22	892	615	7139	1.10978e-11	0.02407	0.0793139	0	5.59527e-09	aya,,,,	aya,,,,TMB	0
TP53	Breast Cancer	factor(aya_status)1	0.376121	0.071481	5.26183	1.42628e-07	6.84025e-05	481	433	3134	4623	2.34657e-12	0.526258	0.404022	1	1.26011e-09	factor(aya_status)1	0.46242	0.0726018	6.36927	1.89933e-10	9.01759e-09	481	433	3132	4622	2.33919e-12	0.526258	0.403921	1	1.25307e-09	aya,histological subtype,,sex,	aya,histological subtype,,sex,TMB	0
NF1	Colorectal Cancer	factor(aya_status)1	0.680444	0.144162	4.72	2.3584e-06	0.000728385	64	643	314	6275	6.3746e-06	0.0905233	0.0476552	1	0.00133587	factor(aya_status)1	0.588301	0.165398	3.55689	0.000375272	0.00733734	64	624	314	5891	1.85703e-05	0.0930233	0.0506044	1	0.00353702	aya,,,,	aya,,,,TMB	0
KIT	Gastrointestinal Stromal Tumor	factor(aya_status)1	-1.25509	0.266937	-4.70182	2.57848e-06	0.000784277	32	32	601	164	1.83305e-06	0.5	0.785621	0	0.000463223	factor(aya_status)1	-1.20472	0.277173	-4.34645	1.38359e-05	0.000351653	31	32	552	149	1.29497e-06	0.492063	0.787447	0	0.000326448	aya,,,,	aya,,,,TMB	0
TP53	Pancreatic Cancer	factor(aya_status)1	-1.16325	0.25668	-4.53192	5.84509e-06	0.00153748	27	78	2198	1191	1.6797e-15	0.257143	0.648569	0	1.312e-12	factor(aya_status)1	-1.13856	0.262185	-4.3426	1.40808e-05	0.00035755	26	77	2186	1183	8.99372e-16	0.252427	0.648857	0	7.00775e-13	aya,histological subtype,,,	aya,histological subtype,metastasis,,TMB	0
KMT2C	Breast Cancer	factor(aya_status)1	-0.927904	0.218477	-4.24714	2.16513e-05	0.00456541	23	630	510	5123	1.60312e-07	0.0352221	0.0905379	0	4.91928e-05	factor(aya_status)1	-0.766497	0.221996	-3.45275	0.000554912	0.0105263	23	630	510	5123	1.60312e-07	0.0352221	0.0905379	0	4.73804e-05	aya,,,,	aya,,,,TMB	0
PBRM1	Renal Cell Carcinoma	factor(aya_status)1	-2.00785	0.474167	-4.23448	2.29078e-05	0.00478146	5	124	403	884	5.86668e-14	0.0387597	0.313131	0	3.87742e-11	factor(aya_status)1	-1.82904	0.478856	-3.81962	0.00013366	0.00284256	5	124	403	884	5.86668e-14	0.0387597	0.313131	0	3.86794e-11	aya,histological subtype,,,	aya,histological subtype,,,TMB	0
AKT3	Colorectal Cancer	factor(aya_status)1	1.02151	0.248076	4.11775	3.82597e-05	0.00725184	22	666	73	6132	0.000165546	0.0319767	0.0117647	1	0.0222245	factor(aya_status)1	0.915648	0.276933	3.30639	0.000945074	0.0170466	22	666	73	6132	0.000165546	0.0319767	0.0117647	1	0.0232606	aya,,,,	aya,,,,TMB	0
FH	Renal Cell Carcinoma	factor(aya_status)1	1.98702	0.483535	4.10935	3.96772e-05	0.0074656	10	121	18	1349	6.25122e-05	0.0763359	0.0131675	1	0.00994638	factor(aya_status)1	2.19964	0.497974	4.41718	9.99991e-06	0.000260327	10	121	18	1349	6.25122e-05	0.0763359	0.0131675	1	0.0103037	aya,,,,	aya,,,,	0
SMO	Embryonal Tumor	factor(aya_status)1	2.69268	0.678314	3.96967	7.19727e-05	0.0119696	13	44	1	32	0.0145281	0.22807	0.030303	1	0.523434	factor(aya_status)1	2.50732	0.703392	3.56462	0.000364389	0.00714586	13	44	1	32	0.0145281	0.22807	0.030303	1	0.52966	aya,,,,	aya,,,,	0
TP53	Skin Cancer, Non-Melanoma	factor(aya_status)1	-0.675163	0.629199	-1.07305	0.283248	1	5	26	364	312	3.00582e-05	0.16129	0.538462	0	0.0051652	factor(aya_status)1	-0.319237	0.810812	-0.393725	0.693784	1	5	26	364	312	3.00582e-05	0.16129	0.538462	0	0.00525773	,,,,undetermined	,,,,TMB	0
FBXW7	Embryonal Tumor	factor(aya_status)1	2.86968	0.726292	3.95114	7.77808e-05	0.0128116	12	45	0	33	0.00316322	0.210526	0	1	0.198383	factor(aya_status)1	2.70835	0.829451	3.26523	0.00109375	0.0194919	12	45	0	33	0.00316322	0.210526	0	1	0.205394	aya,,,,	aya,,,,TMB	0
PIK3CA	Cervical Cancer	factor(aya_status)1	-1.31607	0.333273	-3.94893	7.84998e-05	0.0129094	12	93	107	228	1.61884e-05	0.114286	0.319403	0	0.00295938	factor(aya_status)1	-1.24885	0.341962	-3.65203	0.000260178	0.00525087	12	92	107	226	2.45913e-05	0.115385	0.321321	0	0.00448451	aya,,,,	aya,,,,TMB	0
ARID2	Melanoma	factor(aya_status)1	-1.30001	0.331344	-3.92345	8.72913e-05	0.0140636	10	205	346	2022	1.07493e-05	0.0465116	0.146115	0	0.00218721	factor(aya_status)1	-1.07516	0.352385	-3.05109	0.00228013	0.0378973	10	205	346	2022	1.07493e-05	0.0465116	0.146115	0	0.00219362	aya,,,,	aya,,,,TMB	0
CBFB	Breast Cancer	factor(aya_status)1	-1.25657	0.325191	-3.86409	0.000111505	0.01676	10	796	292	6486	3.46856e-06	0.0124069	0.0430806	0	0.00078426	factor(aya_status)1	-1.252	0.325262	-3.8492	0.000118502	0.00254741	10	796	292	6486	3.46856e-06	0.0124069	0.0430806	0	0.000803487	aya,,metastasis,,	aya,,metastasis,,	0
NRAS	Melanoma	factor(aya_status)1	-0.765649	0.198866	-3.85007	0.000118083	0.0173786	32	199	631	1938	0.000138388	0.138528	0.245621	0	0.0191779	factor(aya_status)1	-0.712482	0.201931	-3.52834	0.00041817	0.00812715	32	183	584	1828	0.00179733	0.148837	0.242123	0	0.138783	aya,,,,	aya,,,,	0
KIT	Melanoma	factor(aya_status)1	-1.68018	0.58885	-2.85332	0.00432644	0.234545	3	228	186	2383	9.64785e-05	0.012987	0.0724017	0	0.0140499	factor(aya_status)1	-1.48996	0.604124	-2.46631	0.0136514	0.179728	3	212	174	2238	0.000298665	0.0139535	0.0721393	0	0.0365694	,histological subtype,,,	,histological subtype,,,TMB	0
RBM10	Non-Small Cell Lung Cancer	factor(aya_status)1	-1.59358	0.585823	-2.72025	0.00652333	0.301897	3	137	885	7697	0.000359599	0.0214286	0.103123	0	0.0414994	factor(aya_status)1	-1.43741	0.588195	-2.44376	0.014535	0.189305	3	137	885	7697	0.000359599	0.0214286	0.103123	0	0.0431228	,,metastasis,,	,,metastasis,,TMB	0
EP300	Hepatobiliary Cancer	factor(aya_status)1	1.74821	0.45988	3.80144	0.000143858	0.0204598	7	104	29	1515	0.00829376	0.0630631	0.0187824	1	0.391538	factor(aya_status)1	1.8231	0.463105	3.93669	8.26125e-05	0.00182841	7	104	29	1515	0.00829376	0.0630631	0.0187824	1	0.392739	aya,,,,	aya,,,,TMB	0
FOXA1	Breast Cancer	factor(aya_status)1	-1.46586	0.386099	-3.79659	0.000146701	0.0207782	7	755	283	5971	6.50656e-08	0.00918635	0.045251	0	2.32935e-05	factor(aya_status)1	-1.35425	0.386975	-3.49958	0.000466	0.00897903	7	755	283	5971	6.50656e-08	0.00918635	0.045251	0	2.32365e-05	aya,,,,	aya,,,,TMB	0
SOCS1	Mature B-Cell Neoplasms	factor(aya_status)1	1.17139	0.310088	3.77761	0.000158339	0.0218853	20	52	55	800	1.43663e-07	0.277778	0.0643275	1	4.57167e-05	factor(aya_status)1	1.2718	0.340342	3.73682	0.000186364	0.00385895	20	52	55	800	1.43663e-07	0.277778	0.0643275	1	4.5605e-05	aya,histological subtype,,,	aya,,,,TMB	0
BRAF	Thyroid Cancer	factor(aya_status)1	-0.688401	0.183002	-3.76172	0.000168751	0.0228647	75	124	476	583	0.0618084	0.376884	0.449481	0	0.920377	factor(aya_status)1	-0.704256	0.185655	-3.79335	0.000148629	0.00313343	75	120	474	561	0.0599521	0.384615	0.457971	0	0.909017	aya,histological subtype,,,	aya,histological subtype,,,	0
MEN1	Pancreatic Cancer	factor(aya_status)1	-1.58071	0.427992	-3.69331	0.000221351	0.0283525	7	96	185	3184	0.511115	0.0679612	0.0549124	1	1	factor(aya_status)1	-1.48604	0.429212	-3.46225	0.000535675	0.0101947	7	96	185	3184	0.511115	0.0679612	0.0549124	1	1	aya,histological subtype,,,	aya,histological subtype,,,	0
SDHA	Glioma	factor(aya_status)1	1.01193	0.275507	3.67298	0.000239735	0.0300809	25	782	39	2920	0.00111073	0.0309789	0.0131801	1	0.0955172	factor(aya_status)1	0.963864	0.290489	3.31807	0.000906418	0.0164078	25	782	39	2920	0.00111073	0.0309789	0.0131801	1	0.101277	aya,,,,	aya,,,,TMB	0
STK11	Non-Small Cell Lung Cancer	factor(aya_status)1	-1.85931	0.508071	-3.65955	0.000252659	0.0313123	4	164	1511	9431	6.66314e-07	0.0238095	0.138092	0	0.000178905	factor(aya_status)1	-1.99258	0.586746	-3.39599	0.000683817	0.0127232	3	162	1441	8993	1.38365e-07	0.0181818	0.138106	0	4.5605e-05	aya,,,sex,	aya,,,sex,TMB	0
GATA3	Breast Cancer	factor(aya_status)1	0.336949	0.0932629	3.6129	0.000302791	0.0359276	167	747	979	6775	5.12012e-06	0.182713	0.126257	1	0.00112198	factor(aya_status)1	0.335603	0.0933787	3.594	0.000325643	0.00645642	167	747	979	6775	5.12012e-06	0.182713	0.126257	1	0.00111924	aya,,,,	aya,histological subtype,,,	0
SMARCA4	Ovarian Cancer	factor(aya_status)1	0.21313	0.471834	0.451706	0.651481	1	12	136	66	2751	0.00038189	0.0810811	0.0234292	1	0.0431737	factor(aya_status)1	0.228573	0.520336	0.43928	0.660458	1	12	136	66	2751	0.00038189	0.0810811	0.0234292	1	0.0448381	,histological subtype,,,	,histological subtype,,,TMB	0
SETD2	Renal Cell Carcinoma	factor(aya_status)1	-1.46116	0.470845	-3.10328	0.00191392	0.136571	5	127	287	1087	1.01494e-07	0.0378788	0.208879	0	3.35397e-05	factor(aya_status)1	-1.16793	0.477847	-2.44416	0.0145191	0.189122	5	127	287	1087	1.01494e-07	0.0378788	0.208879	0	3.47961e-05	,,metastasis,,	,,metastasis,sex,TMB	0
PIK3C2G	Melanoma	factor(aya_status)1	-1.47501	0.465061	-3.17165	0.00151577	0.11509	5	133	216	1366	0.000271413	0.0362319	0.136536	0	0.0328448	factor(aya_status)1	-1.00047	0.497609	-2.01055	0.0443731	0.448515	5	133	216	1366	0.000271413	0.0362319	0.136536	0	0.0341646	,,,sex,	,,,,TMB	0
TP53	Thyroid Cancer	factor(aya_status)1	-0.69218	0.460181	-1.50415	0.132543	1	6	193	145	914	2.38402e-06	0.0301508	0.136922	0	0.000568986	factor(aya_status)1	-0.502985	0.464541	-1.08276	0.278916	1	6	189	144	891	2.33494e-06	0.0307692	0.13913	0	0.000571793	,histological subtype,,,	,histological subtype,,,TMB	0
IDH2	Glioma	factor(aya_status)1	0.75878	0.210458	3.60538	0.000311699	0.036689	45	1010	62	3495	1.09462e-05	0.042654	0.0174304	1	0.00218721	factor(aya_status)1	0.682814	0.218864	3.11981	0.00180967	0.0307893	45	990	62	3444	6.69301e-06	0.0434783	0.017684	1	0.00139917	aya,histological subtype,,,	aya,histological subtype,,,TMB	0
TBX3	Breast Cancer	factor(aya_status)1	-1.23328	0.342416	-3.6017	0.000316142	0.0370008	9	664	328	5506	6.36305e-08	0.013373	0.0562221	0	2.32935e-05	factor(aya_status)1	-1.14963	0.343	-3.3517	0.000803166	0.0147058	9	664	328	5506	6.36305e-08	0.013373	0.0562221	0	2.32365e-05	aya,,,,	aya,,,,TMB	0
PTCH1	Embryonal Tumor	factor(aya_status)1	1.46852	0.40543	3.62213	0.000292188	0.0349606	18	39	5	28	0.131504	0.315789	0.151515	1	1	factor(aya_status)1	1.2247	0.421857	2.90311	0.00369479	0.0582996	18	39	5	28	0.131504	0.315789	0.151515	1	1	aya,,,,	NA	0
WT1	Leukemia	factor(aya_status)1	1.42442	0.396748	3.59024	0.000330379	0.0382331	12	44	24	337	0.00107265	0.214286	0.066482	1	0.0955172	factor(aya_status)1	0.929842	0.570854	1.62886	0.103342	0.785045	5	35	14	250	0.087471	0.125	0.0530303	1	1	aya,,,,	NA	0
TP53	Ovarian Cancer	factor(aya_status)1	-1.03658	0.289113	-3.58536	0.000336611	0.0386243	35	113	2159	666	3.37663e-39	0.236486	0.764248	0	5.8024e-36	factor(aya_status)1	-1.07477	0.290441	-3.70046	0.000215208	0.00441603	35	113	2159	666	3.37663e-39	0.236486	0.764248	0	5.78821e-36	aya,histological subtype,,,	aya,histological subtype,,,	0
B2M	Mature B-Cell Neoplasms	factor(aya_status)1	0.886568	0.372677	2.37892	0.0173636	0.539433	12	55	41	806	0.000218614	0.179104	0.0484061	1	0.0276226	factor(aya_status)1	0.833926	0.403705	2.06568	0.0388586	0.407027	12	55	41	806	0.000218614	0.179104	0.0484061	1	0.0289	,histological subtype,,,	,histological subtype,,,TMB	0
FLT1	Melanoma	factor(aya_status)1	-1.41219	0.367758	-3.83999	0.000123039	0.0178941	8	207	327	2085	5.22337e-06	0.0372093	0.135572	0	0.00112198	factor(aya_status)1	-1.05084	0.412848	-2.54534	0.0109172	0.14868	8	207	327	2085	5.22337e-06	0.0372093	0.135572	0	0.00111924	aya,,,,	,,,,TMB	0
ALK	Melanoma	factor(aya_status)1	-1.32235	0.367075	-3.60241	0.000315286	0.0369426	8	223	299	2269	3.64694e-05	0.034632	0.116433	0	0.00614402	factor(aya_status)1	-0.992164	0.406259	-2.4422	0.0145982	0.189972	8	207	291	2121	6.90712e-05	0.0372093	0.120647	0	0.0109631	aya,histological subtype,,,	,,,,TMB	0
KEAP1	Non-Small Cell Lung Cancer	factor(aya_status)1	-2.53804	0.713417	-3.55758	0.000374286	0.0415425	2	159	1408	8514	1.47127e-08	0.0124224	0.141907	0	5.74597e-06	factor(aya_status)1	-2.3356	0.726161	-3.21637	0.00129825	0.0228224	2	159	1408	8514	1.47127e-08	0.0124224	0.141907	0	5.73192e-06	aya,,metastasis,sex,	aya,,,sex,TMB	0
CTNNB1	Soft Tissue Sarcoma	factor(aya_status)1	0.627428	0.351368	1.78567	0.0741522	1	29	541	28	1742	1.26784e-05	0.0508772	0.0158192	1	0.00247575	factor(aya_status)1	0.703791	0.356089	1.97645	0.0481038	0.476121	29	540	28	1736	1.29115e-05	0.0509666	0.015873	1	0.0025736	,histological subtype,,,	,histological subtype,,,	0
CARD11	Melanoma	factor(aya_status)1	-1.20074	0.34899	-3.44062	0.000580384	0.057487	9	206	284	2086	0.000184803	0.0418605	0.119831	0	0.0244282	factor(aya_status)1	-0.606588	0.371492	-1.63284	0.102502	0.781214	9	206	284	2086	0.000184803	0.0418605	0.119831	0	0.0255476	,,,,undetermined	,,,,TMB	0
RUNX1	Breast Cancer	factor(aya_status)1	-1.28781	0.362286	-3.55467	0.000378459	0.041778	8	906	265	7456	2.99074e-06	0.00875274	0.034322	0	0.000694499	factor(aya_status)1	-1.24143	0.362641	-3.42331	0.000618625	0.0116227	8	906	265	7456	2.99074e-06	0.00875274	0.034322	0	0.000712046	aya,,,,	aya,,,,TMB	0
RB1	CNS Cancer	factor(aya_status)1	2.98852	0.85207	3.50737	0.000452565	0.0479101	7	80	1	350	6.69607e-05	0.0804598	0.002849	1	0.0104605	factor(aya_status)1	3.03103	0.870287	3.48279	0.000496221	0.00950714	7	80	1	349	6.80176e-05	0.0804598	0.00285714	1	0.0109631	aya,,,,	aya,,,,	0
TP53	Endometrial Cancer	factor(aya_status)1	-0.339885	0.34192	-0.99405	0.320199	1	15	48	1285	1498	0.000459133	0.238095	0.461732	0	0.049935	factor(aya_status)1	-0.336506	0.342919	-0.981298	0.326446	1	15	48	1285	1498	0.000459133	0.238095	0.461732	0	0.0517793	,histological subtype,,,	NA	0
CCNE1	Ovarian Cancer	factor(aya_status)1	2.25193	0.65378	3.44448	0.000572151	0.0568902	5	143	14	2811	0.00188399	0.0337838	0.00495575	1	0.138186	factor(aya_status)1	2.23823	0.702545	3.18588	0.00144312	0.0251279	5	143	14	2811	0.00188399	0.0337838	0.00495575	1	0.143253	NA	aya,,,,TMB	0
NOTCH3	Melanoma	factor(aya_status)1	-1.09556	0.333721	-3.28285	0.00102762	0.0870657	10	186	315	1908	0.000115104	0.0510204	0.1417	0	0.0162127	factor(aya_status)1	-0.703939	0.366639	-1.91998	0.0548605	0.522844	10	186	315	1908	0.000115104	0.0510204	0.1417	0	0.0170095	,histological subtype,,sex,	,,,,TMB	0
PIK3R2	Ovarian Cancer	factor(aya_status)1	2.5048	0.72859	3.43787	0.0005863	0.0576851	4	91	13	1731	0.00946489	0.0421053	0.00745413	1	0.417038	factor(aya_status)1	2.45914	0.809091	3.03939	0.00237061	0.0392491	4	91	13	1731	0.00946489	0.0421053	0.00745413	1	0.416018	NA	aya,,,,	0
KRAS	Cancer of Unknown Primary	factor(aya_status)1	-0.919075	0.314379	-2.92346	0.00346164	0.20326	12	126	476	1827	0.000275957	0.0869565	0.206687	0	0.0329308	factor(aya_status)1	-0.927451	0.314854	-2.94566	0.00322267	0.0516168	12	126	472	1811	0.000275039	0.0869565	0.206746	0	0.0341646	,histological subtype,,,	,histological subtype,,,	0
DKC1	Colorectal Cancer	factor(aya_status)1	1.96665	0.582831	3.37431	0.000740015	0.0678858	5	123	8	1299	0.00374322	0.0390625	0.00612089	1	0.220286	factor(aya_status)1	1.9916	0.598103	3.32986	0.000868908	0.0157815	5	123	8	1299	0.00374322	0.0390625	0.00612089	1	0.225937	NA	aya,,,,TMB	0
RB1	Soft Tissue Sarcoma	factor(aya_status)1	-0.475491	0.300941	-1.58001	0.114104	1	14	555	123	1646	2.22569e-05	0.0246046	0.0695308	0	0.00398399	factor(aya_status)1	-0.348289	0.30365	-1.14701	0.251377	1	14	555	122	1642	3.11482e-05	0.0246046	0.069161	0	0.00533943	,,,,undetermined	,,,,TMB	0
VHL	Renal Cell Carcinoma	factor(aya_status)1	-0.159805	0.296205	-0.539506	0.589538	1	36	96	700	679	2.282e-07	0.272727	0.507614	0	6.53563e-05	factor(aya_status)1	-0.00322808	0.301773	-0.0106971	0.991465	1	36	96	699	675	1.52493e-07	0.272727	0.508734	0	4.66793e-05	,,,,undetermined	,,,,TMB	0
TMPRSS2	Bladder Cancer	factor(aya_status)1	2.66047	0.801547	3.31917	0.000902866	0.0790955	2	28	13	2190	0.0164398	0.0666667	0.00590104	1	0.543274	factor(aya_status)1	2.66032	0.825112	3.22418	0.00126332	0.0222574	2	28	13	2190	0.0164398	0.0666667	0.00590104	1	0.54778	NA	aya,,,,TMB	0
TP53	Hepatobiliary Cancer	factor(aya_status)1	-0.601083	0.292947	-2.05185	0.0401841	0.81831	16	96	549	1011	2.30301e-06	0.142857	0.351923	0	0.000565357	factor(aya_status)1	-0.608655	0.305318	-1.99351	0.0462056	0.46187	16	95	538	1006	3.56574e-06	0.144144	0.348446	0	0.000804263	,histological subtype,,,	,histological subtype,,,TMB	0
PDCD1	Pancreatic Cancer	factor(aya_status)1	2.78831	0.840202	3.31862	0.000904627	0.0791153	2	100	6	3352	0.0214593	0.0196078	0.00178678	1	0.61898	factor(aya_status)1	2.77701	0.850343	3.26575	0.00109174	0.0194686	2	100	6	3352	0.0214593	0.0196078	0.00178678	1	0.634477	NA	aya,,,,	0
FGFR3	Hepatobiliary Cancer	factor(aya_status)1	1.94991	0.609783	3.19771	0.00138522	0.108452	5	108	11	1565	0.00295353	0.0442478	0.0069797	1	0.187976	factor(aya_status)1	2.15895	0.625232	3.45304	0.000554312	0.0105171	5	106	10	1534	0.00216506	0.045045	0.00647668	1	0.15726	NA	aya,,,,	0
SS18	Breast Cancer	factor(aya_status)1	1.91365	0.614559	3.11386	0.00184657	0.133055	5	227	7	1799	0.00739576	0.0215517	0.00387597	1	0.354996	factor(aya_status)1	1.94996	0.619587	3.14719	0.00164846	0.0283011	5	227	7	1799	0.00739576	0.0215517	0.00387597	1	0.356118	NA	aya,,,,	0
PTPRT	Melanoma	factor(aya_status)1	-1.07186	0.279065	-3.8409	0.000122586	0.0178783	16	122	382	1115	0.000163976	0.115942	0.255177	0	0.0222245	factor(aya_status)1	-0.382668	0.304752	-1.25567	0.209236	1	16	122	382	1115	0.000163976	0.115942	0.255177	0	0.0232606	aya,histological subtype,,,	,,,,TMB	0
PNRC1	Esophagogastric Cancer	factor(aya_status)1	2.32168	0.748571	3.10149	0.00192552	0.137096	3	114	7	1638	0.024276	0.025641	0.00425532	1	0.658483	factor(aya_status)1	3.23222	0.874205	3.69732	0.000217887	0.0044677	3	114	7	1638	0.024276	0.025641	0.00425532	1	0.671659	NA	aya,,,,TMB	0
ATRX	Soft Tissue Sarcoma	factor(aya_status)1	-0.746222	0.269538	-2.76852	0.00563117	0.275967	17	552	176	1588	1.27678e-08	0.029877	0.0997732	0	5.22383e-06	factor(aya_status)1	-0.681079	0.270864	-2.51447	0.0119212	0.160394	17	552	176	1588	1.27678e-08	0.029877	0.0997732	0	5.21107e-06	,,,,undetermined	,,,,TMB	0
GRIN2A	Melanoma	factor(aya_status)1	-0.957445	0.269526	-3.55233	0.00038183	0.0419732	17	141	395	1337	0.000259926	0.107595	0.22806	0	0.0319041	factor(aya_status)1	-0.307843	0.285323	-1.07893	0.280621	1	17	141	395	1337	0.000259926	0.107595	0.22806	0	0.0332512	aya,histological subtype,,sex,	,,,,TMB	0
KRAS	Ovarian Cancer	factor(aya_status)1	-0.548161	0.261613	-2.09532	0.0361429	0.783138	36	112	224	2603	4.15606e-09	0.243243	0.0792359	1	1.78544e-06	factor(aya_status)1	-0.549326	0.261505	-2.10063	0.035673	0.382799	36	112	224	2601	4.23182e-09	0.243243	0.079292	1	1.81355e-06	,histological subtype,,,	,histological subtype,,,	0
CDH1	Esophagogastric Cancer	factor(aya_status)1	0.355644	0.259443	1.3708	0.170437	1	26	110	207	2105	0.000402338	0.191176	0.0895329	1	0.0448947	factor(aya_status)1	0.444664	0.261998	1.6972	0.0896588	0.719391	26	110	207	2100	0.000409281	0.191176	0.0897269	1	0.0474046	,histological subtype,,sex,	,histological subtype,,sex,TMB	0
NF1	Melanoma	factor(aya_status)1	-1.32263	0.258477	-5.11701	3.10412e-07	0.000132677	17	211	604	1936	7.36852e-10	0.0745614	0.237795	0	3.51724e-07	factor(aya_status)1	-0.736924	0.29383	-2.50799	0.0121418	0.16297	17	198	604	1808	5.32576e-10	0.0790698	0.250415	0	2.53595e-07	aya,histological subtype,,,	,,,,TMB	0
KDM5A	Glioma	factor(aya_status)1	1.00313	0.255327	3.92882	8.53625e-05	0.0139049	27	813	51	2791	0.0194247	0.0321429	0.0179451	1	0.598875	factor(aya_status)1	0.832701	0.298365	2.79088	0.00525656	0.0794576	27	813	51	2791	0.0194247	0.0321429	0.0179451	1	0.607625	aya,,,,	NA	0
RFWD2	Hepatobiliary Cancer	factor(aya_status)1	2.27545	0.766408	2.96898	0.00298793	0.185261	3	86	6	1161	0.0211403	0.0337079	0.00514139	1	0.616753	factor(aya_status)1	2.5929	0.80618	3.21628	0.00129864	0.0228224	3	86	6	1161	0.0211403	0.0337079	0.00514139	1	0.632336	NA	aya,,,,TMB	0
ERBB4	Melanoma	factor(aya_status)1	-0.843187	0.243123	-3.46815	0.000524058	0.0532376	20	211	444	2124	0.00041565	0.0865801	0.172897	0	0.0457854	factor(aya_status)1	-0.183138	0.258863	-0.707471	0.479274	1	20	195	428	1984	0.00120575	0.0930233	0.177446	0	0.106541	,histological subtype,,,	NA	0
ROS1	Melanoma	factor(aya_status)1	-0.932981	0.22882	-4.07736	4.55491e-05	0.00822548	23	199	544	1916	1.52012e-05	0.103604	0.221138	0	0.00290241	factor(aya_status)1	-0.45901	0.245618	-1.8688	0.0616505	0.56631	23	192	544	1868	1.9631e-05	0.106977	0.225539	0	0.00365777	aya,,,,	,,,,TMB	0
KMT2D	Melanoma	factor(aya_status)1	-0.78196	0.225781	-3.46335	0.000533491	0.0538749	24	191	506	1906	0.00036225	0.111628	0.209784	0	0.0414994	factor(aya_status)1	-0.31024	0.241533	-1.28446	0.198981	1	24	191	506	1906	0.00036225	0.111628	0.209784	0	0.0431228	,histological subtype,,,	,histological subtype,,,TMB	0
ICOSLG	Non-Small Cell Lung Cancer	factor(aya_status)1	2.26723	0.770134	2.94394	0.00324064	0.194926	2	110	15	6335	0.0341774	0.0178571	0.0023622	1	0.743424	factor(aya_status)1	2.44689	0.77737	3.14766	0.00164584	0.028262	2	110	15	6335	0.0341774	0.0178571	0.00236221	1	0.751114	NA	aya,,,,	0
CREBBP	Mesothelioma	factor(aya_status)1	1.688	0.59186	2.85203	0.00434416	0.235147	5	34	14	594	0.0038267	0.128205	0.0230263	1	0.222155	factor(aya_status)1	2.13981	0.641146	3.33748	0.000845421	0.015386	5	34	14	594	0.0038267	0.128205	0.0230263	1	0.227768	NA	aya,,,,TMB	0
PHOX2B	Skin Cancer, Non-Melanoma	factor(aya_status)1	2.92095	1.02687	2.84452	0.00444778	0.238176	2	28	13	625	0.142519	0.0666667	0.0203762	1	1	factor(aya_status)1	3.28418	1.07101	3.06642	0.00216641	0.0362341	2	28	13	625	0.142519	0.0666667	0.0203762	1	1	NA	aya,,,,TMB	0
TP53	Cancer of Unknown Primary	factor(aya_status)1	-0.562227	0.193353	-2.90778	0.00364005	0.210859	46	92	1137	1159	0.00021582	0.333333	0.495209	0	0.0276226	factor(aya_status)1	-0.370499	0.198565	-1.86589	0.0620574	0.568589	46	92	1129	1154	0.00021917	0.333333	0.494525	0	0.0289	,histological subtype,,,	,histological subtype,,,TMB	0
PTEN	Mesothelioma	factor(aya_status)1	2.0054	0.726333	2.761	0.00576253	0.279746	3	36	10	599	0.0378907	0.0769231	0.0164204	1	0.772113	factor(aya_status)1	2.50172	0.795179	3.14611	0.00165456	0.0283972	3	36	10	598	0.0380415	0.0769231	0.0164474	1	0.780269	NA	aya,,,,TMB	0
MSH2	Colorectal Cancer	factor(aya_status)1	0.707355	0.182407	3.87789	0.000105365	0.0161438	39	649	177	6028	0.000196048	0.056686	0.0285254	1	0.0255219	factor(aya_status)1	0.577606	0.215081	2.68553	0.00724148	0.105007	39	649	177	6028	0.000196048	0.056686	0.0285254	1	0.0266719	aya,,,,	,,,,TMB	0
CSDE1	Gastrointestinal Stromal Tumor	factor(aya_status)1	1.56772	0.581062	2.69803	0.00697507	0.314889	5	31	11	300	0.0170449	0.138889	0.0353698	1	0.548501	factor(aya_status)1	1.82407	0.606336	3.00835	0.00262675	0.0430426	5	31	11	300	0.0170449	0.138889	0.0353698	1	0.553378	NA	aya,,,,	0
RB1	Glioma	factor(aya_status)1	0.248624	0.160927	1.54495	0.122359	1	55	983	297	3210	0.000574456	0.0529865	0.0846878	0	0.0587586	factor(aya_status)1	0.116669	0.168623	0.691896	0.489003	1	54	981	297	3209	0.000430355	0.0521739	0.0847119	0	0.049181	NA	,histological subtype,,,TMB	0
BRAF	Glioma	factor(aya_status)1	0.0950531	0.157558	0.603289	0.546316	1	78	979	118	3439	7.31165e-08	0.0737938	0.033174	1	2.51287e-05	factor(aya_status)1	-0.0520933	0.165131	-0.315467	0.752407	1	73	962	117	3389	8.39246e-07	0.0705314	0.0333714	1	0.000224787	,histological subtype,,,	,histological subtype,,,TMB	0
TP53	Soft Tissue Sarcoma	factor(aya_status)1	-0.252479	0.155441	-1.62428	0.104316	1	73	496	474	1295	1.12523e-12	0.128295	0.267948	0	6.44529e-10	factor(aya_status)1	-0.00773555	0.162509	-0.0476009	0.962034	1	73	496	472	1292	1.11389e-12	0.128295	0.267574	0	6.36479e-10	,,,,undetermined	,,,,TMB	0
NKX3-1	Endometrial Cancer	factor(aya_status)1	1.76659	0.659954	2.67683	0.00743218	0.328197	3	44	19	2108	0.0109348	0.0638298	0.00893277	1	0.449532	factor(aya_status)1	2.35489	0.744778	3.16186	0.00156762	0.0270174	3	44	19	2108	0.0109348	0.0638298	0.00893277	1	0.448433	NA	aya,,,,TMB	0
PIK3R1	Glioma	factor(aya_status)1	-0.24296	0.151591	-1.60273	0.108994	1	61	974	339	3167	0.000105032	0.0589372	0.0966914	0	0.0150406	factor(aya_status)1	-0.32671	0.155207	-2.105	0.0352912	0.379798	61	974	339	3167	0.000105032	0.0589372	0.0966914	0	0.0157935	,histological subtype,,,	,histological subtype,,,TMB	0
QKI	Pancreatic Cancer	factor(aya_status)1	2.4101	0.917107	2.62794	0.00859033	0.358954	2	27	6	960	0.0206076	0.0689655	0.00621118	1	0.614729	factor(aya_status)1	2.81577	0.924201	3.0467	0.00231368	0.0383749	2	27	6	960	0.0206076	0.0689655	0.00621118	1	0.627567	NA	aya,,,,	0
SLC34A2	Cancer of Unknown Primary	factor(aya_status)1	1.56289	0.607217	2.57386	0.0100571	0.393998	4	32	17	570	0.0277558	0.111111	0.0289608	1	0.681366	factor(aya_status)1	1.87291	0.626842	2.98785	0.00280943	0.0456471	4	32	17	570	0.0277558	0.111111	0.0289608	1	0.687559	NA	aya,,,,TMB	0
MYD88	Esophagogastric Cancer	factor(aya_status)1	1.84238	0.719366	2.56112	0.0104335	0.403412	3	133	8	2299	0.0200235	0.0220588	0.00346771	1	0.607923	factor(aya_status)1	2.29103	0.746642	3.06844	0.00215179	0.0360112	3	133	8	2299	0.0200235	0.0220588	0.00346771	1	0.619573	NA	aya,,,,TMB	0
ERCC3	Pancreatic Cancer	factor(aya_status)1	1.80201	0.749339	2.4048	0.0161812	0.517752	3	91	11	3091	0.00708779	0.0319149	0.0035461	1	0.344058	factor(aya_status)1	2.89989	0.788157	3.67932	0.000233852	0.00476354	3	91	11	3091	0.00708779	0.0319149	0.0035461	1	0.34714	NA	aya,,,,TMB	0
NTRK2	Ovarian Cancer	factor(aya_status)1	1.67871	0.698127	2.40459	0.0161906	0.517752	3	145	23	2802	0.136559	0.0202703	0.00814159	1	1	factor(aya_status)1	2.3072	0.747376	3.08707	0.00202143	0.0340081	3	145	23	2802	0.136559	0.0202703	0.00814159	1	1	NA	aya,,,,TMB	0
DICER1	Pancreatic Cancer	factor(aya_status)1	1.15758	0.566438	2.04362	0.0409915	0.823913	4	98	37	3300	0.0318779	0.0392157	0.0110878	1	0.715131	factor(aya_status)1	1.98698	0.578988	3.43181	0.000599559	0.0112884	4	98	37	3300	0.0318779	0.0392157	0.0110878	1	0.726665	NA	aya,,,,TMB	0
RICTOR	Renal Cell Carcinoma	factor(aya_status)1	1.31573	0.754779	1.7432	0.0812987	1	3	116	6	1094	0.0491855	0.0252101	0.00545455	1	0.845204	factor(aya_status)1	2.75646	0.923234	2.98566	0.00282965	0.0459422	3	116	6	1094	0.0491855	0.0252101	0.00545454	1	0.843139	NA	aya,,,,TMB	0
HLA-B	Esophagogastric Cancer	factor(aya_status)1	0.956596	0.658215	1.45332	0.146135	1	3	71	16	935	0.152244	0.0405405	0.0168244	1	1	factor(aya_status)1	2.4835	0.813827	3.05163	0.002276	0.03784	3	71	16	935	0.152244	0.0405405	0.0168244	1	1	NA	aya,,,,TMB	0

## Sheet: Compare_original&race_models
		original results															add Race results
		Logistic model results						Fisher's test results									Logistic model results						Fisher's test results
Gene	Cancer	Factors	Estimate	Std..Error	z.value	P value	FDR	aya_mut	aya_wt	adult_mut	adult_wt	P value	murate_aya	murate_adult	Higher_AYA	FDR	Factors	Estimate	Std..Error	z.value	P value	FDR	aya_mut	aya_wt	adult_mut	adult_wt	P value	murate_aya	murate_adult	Higher_AYA	FDR	Significant Variables_origin	Significant Variables_addrace
IDH1	Glioma	factor(aya_status)1	1.86362	0.0981981	18.9782	2.58252e-80	2.66286e-75	588	469	667	2890	6.30256e-114	0.556291	0.187518	1	5.41516e-110	factor(aya_status)1	1.88871	0.099389	19.0032	1.60452e-80	1.10224e-75	588	469	667	2890	6.30256e-114	0.556291	0.187518	1	5.41516e-110	aya,histological subtype,metastasis,,	aya,histological subtype,metastasis,,race
ATRX	Glioma	factor(aya_status)1	1.62913	0.0925986	17.5935	2.76497e-69	7.12746e-65	427	608	440	3066	8.88155e-84	0.41256	0.125499	1	3.81551e-80	factor(aya_status)1	1.62467	0.0928763	17.4928	1.62575e-68	3.72274e-64	427	608	440	3066	8.88155e-84	0.41256	0.125499	1	3.81551e-80	aya,histological subtype,metastasis,,	aya,histological subtype,metastasis,,
TP53	Glioma	factor(aya_status)1	1.32639	0.089576	14.8075	1.31069e-49	1.50163e-45	563	479	1127	2384	8.20228e-37	0.540307	0.320991	1	1.17457e-33	factor(aya_status)1	1.3116	0.0898072	14.6046	2.62556e-48	3.6073e-44	563	479	1127	2384	8.20228e-37	0.540307	0.320991	1	1.17457e-33	aya,histological subtype,,,	aya,histological subtype,,,
PIK3CA	Breast Cancer	factor(aya_status)1	-0.748732	0.0861506	-8.69096	3.59378e-18	8.82281e-15	186	729	2857	4919	2.02686e-24	0.203279	0.367413	0	2.17685e-21	factor(aya_status)1	-0.764796	0.0864737	-8.84426	9.21382e-19	3.08757e-15	186	729	2857	4919	2.02686e-24	0.203279	0.367413	0	2.17685e-21	aya,,,,	aya,,,,race
PTEN	Glioma	factor(aya_status)1	-1.12083	0.141044	-7.94665	1.91628e-15	3.29316e-12	64	978	1073	2438	6.73253e-70	0.0614203	0.305611	0	1.9282e-66	factor(aya_status)1	-1.09881	0.141412	-7.77032	7.82865e-15	1.62969e-11	64	978	1073	2438	6.73253e-70	0.0614203	0.305611	0	1.9282e-66	aya,histological subtype,,,	aya,histological subtype,,,
H3F3A	Glioma	factor(aya_status)1	1.42134	0.196023	7.25088	4.14086e-13	5.84888e-10	67	937	27	3360	8.32345e-24	0.0667331	0.00797166	1	7.94612e-21	factor(aya_status)1	1.39279	0.197078	7.0672	1.58089e-12	2.64881e-09	67	937	27	3360	8.32345e-24	0.0667331	0.00797166	1	7.94612e-21	aya,histological subtype,,,	aya,histological subtype,,,race
EGFR	Glioma	factor(aya_status)1	-0.985283	0.154305	-6.38528	1.71085e-10	1.57506e-07	52	1005	628	2929	1.94988e-29	0.0491958	0.176553	0	2.39334e-26	factor(aya_status)1	-0.984634	0.154521	-6.37216	1.86379e-10	2.24623e-07	52	1005	628	2929	1.94988e-29	0.0491958	0.176553	0	2.39334e-26	aya,histological subtype,,,	aya,histological subtype,,,
CDH1	Breast Cancer	factor(aya_status)1	-1.84684	0.296352	-6.23192	4.60745e-10	3.86243e-07	14	900	1165	6591	5.71349e-42	0.0153173	0.150206	0	1.22726e-38	factor(aya_status)1	-1.82137	0.296582	-6.14122	8.18878e-10	8.78963e-07	14	900	1165	6591	5.71349e-42	0.0153173	0.150206	0	1.22726e-38	aya,histological subtype,,,	aya,histological subtype,,,
CTNNB1	Endometrial Cancer	factor(aya_status)1	1.73116	0.281327	6.15353	7.57753e-10	6.25061e-07	37	26	454	2336	6.92977e-14	0.587302	0.162724	1	4.2529e-11	factor(aya_status)1	1.69136	0.284776	5.93925	2.86321e-09	2.75092e-06	37	26	454	2336	6.92977e-14	0.587302	0.162724	1	4.2529e-11	aya,histological subtype,metastasis,,	aya,histological subtype,metastasis,,
KRAS	Non-Small Cell Lung Cancer	factor(aya_status)1	-2.01671	0.344705	-5.85054	4.89978e-09	3.28066e-06	9	167	3329	8116	2.31392e-15	0.0511364	0.290869	0	1.65676e-12	factor(aya_status)1	-1.89835	0.346077	-5.48533	4.12691e-08	2.98424e-05	9	167	3329	8116	2.31392e-15	0.0511364	0.290869	0	1.65676e-12	aya,histological subtype,metastasis,sex,	aya,histological subtype,metastasis,sex,race
KRAS	Pancreatic Cancer	factor(aya_status)1	-1.61323	0.281809	-5.72455	1.03708e-08	6.40327e-06	36	71	2711	704	1.78208e-23	0.336449	0.793851	0	1.53116e-20	factor(aya_status)1	-1.5666	0.284163	-5.51304	3.5269e-08	2.60521e-05	36	71	2711	704	1.78208e-23	0.336449	0.793851	0	1.53116e-20	aya,histological subtype,,,	aya,histological subtype,,,
MAP3K1	Breast Cancer	factor(aya_status)1	-1.25972	0.22052	-5.71249	1.11332e-08	6.79262e-06	22	892	615	7139	1.10978e-11	0.02407	0.0793139	0	5.60898e-09	factor(aya_status)1	-1.24108	0.220723	-5.62278	1.87906e-08	1.45857e-05	22	892	615	7139	1.10978e-11	0.02407	0.0793139	0	5.60898e-09	aya,,,,	aya,,,,
TP53	Breast Cancer	factor(aya_status)1	0.376121	0.071481	5.26183	1.42628e-07	6.84025e-05	481	433	3134	4623	2.34657e-12	0.526258	0.404022	1	1.26011e-09	factor(aya_status)1	0.379837	0.0718355	5.2876	1.23935e-07	7.81084e-05	481	433	3134	4623	2.34657e-12	0.526258	0.404022	1	1.26011e-09	aya,histological subtype,,sex,	aya,histological subtype,,sex,race
NF1	Melanoma	factor(aya_status)1	-1.32263	0.258477	-5.11701	3.10412e-07	0.000132677	17	211	604	1936	7.36852e-10	0.0745614	0.237795	0	3.51724e-07	factor(aya_status)1	-1.30704	0.259169	-5.04318	4.57864e-07	0.000248644	17	211	604	1936	7.36852e-10	0.0745614	0.237795	0	3.51724e-07	aya,histological subtype,,,	aya,histological subtype,,,race
NF1	Colorectal Cancer	factor(aya_status)1	0.680444	0.144162	4.72	2.3584e-06	0.000728385	64	643	314	6275	6.3746e-06	0.0905233	0.0476552	1	0.00133587	factor(aya_status)1	0.697308	0.144614	4.82184	1.4224e-06	0.00063865	64	643	314	6275	6.3746e-06	0.0905233	0.0476552	1	0.00133587	aya,,,,	aya,,,,
KIT	Gastrointestinal Stromal Tumor	factor(aya_status)1	-1.25509	0.266937	-4.70182	2.57848e-06	0.000784277	32	32	601	164	1.83305e-06	0.5	0.785621	0	0.000463223	factor(aya_status)1	-1.25134	0.271378	-4.61105	4.00638e-06	0.00146531	32	32	601	164	1.83305e-06	0.5	0.785621	0	0.000463223	aya,,,,	aya,,,,
TP53	Pancreatic Cancer	factor(aya_status)1	-1.16325	0.25668	-4.53192	5.84509e-06	0.00153748	27	78	2198	1191	1.6797e-15	0.257143	0.648569	0	1.312e-12	factor(aya_status)1	-1.13743	0.258355	-4.40257	1.06977e-05	0.00332529	27	78	2198	1191	1.6797e-15	0.257143	0.648569	0	1.312e-12	aya,histological subtype,,,	aya,histological subtype,,,
KMT2C	Breast Cancer	factor(aya_status)1	-0.927904	0.218477	-4.24714	2.16513e-05	0.00456541	23	630	510	5123	1.60312e-07	0.0352221	0.0905379	0	4.91928e-05	factor(aya_status)1	-0.945591	0.218903	-4.31967	1.56261e-05	0.00455817	23	630	510	5123	1.60312e-07	0.0352221	0.0905379	0	4.91928e-05	aya,,,,	aya,,,,
PBRM1	Renal Cell Carcinoma	factor(aya_status)1	-2.00785	0.474167	-4.23448	2.29078e-05	0.00478146	5	124	403	884	5.86668e-14	0.0387597	0.313131	0	3.87742e-11	factor(aya_status)1	-2.0134	0.475412	-4.23507	2.28478e-05	0.00624077	5	124	403	884	5.86668e-14	0.0387597	0.313131	0	3.87742e-11	aya,histological subtype,,,	aya,histological subtype,,,
AKT3	Colorectal Cancer	factor(aya_status)1	1.02151	0.248076	4.11775	3.82597e-05	0.00725184	22	666	73	6132	0.000165546	0.0319767	0.0117647	1	0.0222245	factor(aya_status)1	1.01991	0.248682	4.10125	4.10925e-05	0.00997488	22	666	73	6132	0.000165546	0.0319767	0.0117647	1	0.0222245	aya,,,,	aya,,,,
FH	Renal Cell Carcinoma	factor(aya_status)1	1.98702	0.483535	4.10935	3.96772e-05	0.0074656	10	121	18	1349	6.25122e-05	0.0763359	0.0131675	1	0.00994638	factor(aya_status)1	1.90546	0.500747	3.80524	0.000141667	0.0258485	10	121	18	1349	6.25122e-05	0.0763359	0.0131675	1	0.00994638	aya,,,,	aya,,,,
ROS1	Melanoma	factor(aya_status)1	-0.932981	0.22882	-4.07736	4.55491e-05	0.00822548	23	199	544	1916	1.52012e-05	0.103604	0.221138	0	0.00290241	factor(aya_status)1	-0.941479	0.229273	-4.10636	4.0194e-05	0.00979306	23	199	544	1916	1.52012e-05	0.103604	0.221138	0	0.00290241	aya,,,,	aya,,,,
SMO	Embryonal Tumor	factor(aya_status)1	2.69268	0.678314	3.96967	7.19727e-05	0.0119696	13	44	1	32	0.0145281	0.22807	0.030303	1	0.523434	factor(aya_status)1	2.63125	0.685241	3.83989	0.000123092	0.0235213	13	44	1	32	0.0145281	0.22807	0.030303	1	0.523434	aya,,,,	aya,,,,
FBXW7	Embryonal Tumor	factor(aya_status)1	2.86968	0.726292	3.95114	7.77808e-05	0.0128116	12	45	0	33	0.00316322	0.210526	0	1	0.198383	factor(aya_status)1	2.87792	0.73955	3.89145	9.96466e-05	0.0200071	12	45	0	33	0.00316322	0.210526	0	1	0.198383	aya,,,,	aya,,,,
PIK3CA	Cervical Cancer	factor(aya_status)1	-1.31607	0.333273	-3.94893	7.84998e-05	0.0129094	12	93	107	228	1.61884e-05	0.114286	0.319403	0	0.00295938	factor(aya_status)1	-1.33618	0.336962	-3.96538	7.32787e-05	0.0157066	12	93	107	228	1.61884e-05	0.114286	0.319403	0	0.00295938	aya,,,,	aya,,,,
KDM5A	Glioma	factor(aya_status)1	1.00313	0.255327	3.92882	8.53625e-05	0.0139049	27	813	51	2791	0.0194247	0.0321429	0.0179451	1	0.598875	factor(aya_status)1	0.959124	0.255827	3.74911	0.000177463	0.0305156	27	813	51	2791	0.0194247	0.0321429	0.0179451	1	0.598875	aya,,,,	aya,,,,
ARID2	Melanoma	factor(aya_status)1	-1.30001	0.331344	-3.92345	8.72913e-05	0.0140636	10	205	346	2022	1.07493e-05	0.0465116	0.146115	0	0.00218721	factor(aya_status)1	-1.29962	0.331711	-3.91794	8.93078e-05	0.0183411	10	205	346	2022	1.07493e-05	0.0465116	0.146115	0	0.00218721	aya,,,,	aya,,,,
MSH2	Colorectal Cancer	factor(aya_status)1	0.707355	0.182407	3.87789	0.000105365	0.0161438	39	649	177	6028	0.000196048	0.056686	0.0285254	1	0.0255219	factor(aya_status)1	0.70155	0.182883	3.83606	0.000125023	0.0237911	39	649	177	6028	0.000196048	0.056686	0.0285254	1	0.0255219	aya,,,,	aya,,,,
CBFB	Breast Cancer	factor(aya_status)1	-1.25657	0.325191	-3.86409	0.000111505	0.01676	10	796	292	6486	3.46856e-06	0.0124069	0.0430806	0	0.00078426	factor(aya_status)1	-1.24629	0.325582	-3.82787	0.000129258	0.0243943	10	796	292	6486	3.46856e-06	0.0124069	0.0430806	0	0.00078426	aya,,metastasis,,	aya,,metastasis,,
NRAS	Melanoma	factor(aya_status)1	-0.765649	0.198866	-3.85007	0.000118083	0.0173786	32	199	631	1938	0.000138388	0.138528	0.245621	0	0.0191779	factor(aya_status)1	-0.766102	0.199146	-3.84694	0.0001196	0.0229178	32	199	631	1938	0.000138388	0.138528	0.245621	0	0.0191779	aya,,,,	aya,,,,
PTPRT	Melanoma	factor(aya_status)1	-1.07186	0.279065	-3.8409	0.000122586	0.0178783	16	122	382	1115	0.000163976	0.115942	0.255177	0	0.0222245	factor(aya_status)1	-1.04339	0.280608	-3.7183	0.000200565	0.0337414	16	122	382	1115	0.000163976	0.115942	0.255177	0	0.0222245	aya,histological subtype,,,	aya,histological subtype,,,
FLT1	Melanoma	factor(aya_status)1	-1.41219	0.367758	-3.83999	0.000123039	0.0178941	8	207	327	2085	5.22337e-06	0.0372093	0.135572	0	0.00112198	factor(aya_status)1	-1.41291	0.368212	-3.83721	0.000124441	0.0237132	8	207	327	2085	5.22337e-06	0.0372093	0.135572	0	0.00112198	aya,,,,	aya,,,,
EP300	Hepatobiliary Cancer	factor(aya_status)1	1.74821	0.45988	3.80144	0.000143858	0.0204598	7	104	29	1515	0.00829376	0.0630631	0.0187824	1	0.391538	factor(aya_status)1	1.81103	0.466319	3.88368	0.000102887	0.0204275	7	104	29	1515	0.00829376	0.0630631	0.0187824	1	0.391538	aya,,,,	aya,,,,
FOXA1	Breast Cancer	factor(aya_status)1	-1.46586	0.386099	-3.79659	0.000146701	0.0207782	7	755	283	5971	6.50656e-08	0.00918635	0.045251	0	2.32935e-05	factor(aya_status)1	-1.44847	0.386424	-3.74841	0.000177962	0.0305431	7	755	283	5971	6.50656e-08	0.00918635	0.045251	0	2.32935e-05	aya,,,,	aya,,,,
SOCS1	Mature B-Cell Neoplasms	factor(aya_status)1	1.17139	0.310088	3.77761	0.000158339	0.0218853	20	52	55	800	1.43663e-07	0.277778	0.0643275	1	4.57167e-05	factor(aya_status)1	1.13305	0.315444	3.59193	0.00032824	0.0480784	20	52	55	800	1.43663e-07	0.277778	0.0643275	1	4.57167e-05	aya,histological subtype,,,	aya,histological subtype,,,
BRAF	Thyroid Cancer	factor(aya_status)1	-0.688401	0.183002	-3.76172	0.000168751	0.0228647	75	124	476	583	0.0618084	0.376884	0.449481	0	0.920377	factor(aya_status)1	-0.71991	0.186039	-3.86967	0.000108982	0.021348	75	124	476	583	0.0618084	0.376884	0.449481	0	0.920377	aya,histological subtype,,,	aya,histological subtype,,,race
MEN1	Pancreatic Cancer	factor(aya_status)1	-1.58071	0.427992	-3.69331	0.000221351	0.0283525	7	96	185	3184	0.511115	0.0679612	0.0549124	1	1	factor(aya_status)1	-1.45633	0.434732	-3.34994	0.000808304	0.0917048	7	96	185	3184	0.511115	0.0679612	0.0549124	1	1	aya,histological subtype,,,	NA
SDHA	Glioma	factor(aya_status)1	1.01193	0.275507	3.67298	0.000239735	0.0300809	25	782	39	2920	0.00111073	0.0309789	0.0131801	1	0.0955172	factor(aya_status)1	1.00073	0.276132	3.62411	0.000289961	0.0442156	25	782	39	2920	0.00111073	0.0309789	0.0131801	1	0.0955172	aya,,,,	aya,,,,
STK11	Non-Small Cell Lung Cancer	factor(aya_status)1	-1.85931	0.508071	-3.65955	0.000252659	0.0313123	4	164	1511	9431	6.66314e-07	0.0238095	0.138092	0	0.000178905	factor(aya_status)1	-1.76011	0.509276	-3.4561	0.000548059	0.0697212	4	164	1511	9431	6.66314e-07	0.0238095	0.138092	0	0.000178905	aya,,,sex,	,,,sex,race
PTCH1	Embryonal Tumor	factor(aya_status)1	1.46852	0.40543	3.62213	0.000292188	0.0349606	18	39	5	28	0.131504	0.315789	0.151515	1	1	factor(aya_status)1	1.45051	0.415307	3.49261	0.000478328	0.0630695	18	39	5	28	0.131504	0.315789	0.151515	1	1	aya,,,,	NA
GATA3	Breast Cancer	factor(aya_status)1	0.336949	0.0932629	3.6129	0.000302791	0.0359276	167	747	979	6775	5.12012e-06	0.182713	0.126257	1	0.00112198	factor(aya_status)1	0.338036	0.0935685	3.61271	0.00030301	0.0452895	167	747	979	6775	5.12012e-06	0.182713	0.126257	1	0.00112198	aya,,,,	aya,,,,
IDH2	Glioma	factor(aya_status)1	0.75878	0.210458	3.60538	0.000311699	0.036689	45	1010	62	3495	1.09462e-05	0.042654	0.0174304	1	0.00218721	factor(aya_status)1	0.761824	0.21059	3.61757	0.00029738	0.0449966	45	1010	62	3495	1.09462e-05	0.042654	0.0174304	1	0.00218721	aya,histological subtype,,,	aya,histological subtype,,,
ALK	Melanoma	factor(aya_status)1	-1.32235	0.367075	-3.60241	0.000315286	0.0369426	8	223	299	2269	3.64694e-05	0.034632	0.116433	0	0.00614402	factor(aya_status)1	-1.30681	0.367486	-3.55608	0.000376428	0.0528816	8	223	299	2269	3.64694e-05	0.034632	0.116433	0	0.00614402	aya,histological subtype,,,	,,,,,undetermined
TBX3	Breast Cancer	factor(aya_status)1	-1.23328	0.342416	-3.6017	0.000316142	0.0370008	9	664	328	5506	6.36305e-08	0.013373	0.0562221	0	2.32935e-05	factor(aya_status)1	-1.25333	0.342952	-3.65453	0.000257658	0.0405157	9	664	328	5506	6.36305e-08	0.013373	0.0562221	0	2.32935e-05	aya,,,,	aya,,,,
WT1	Leukemia	factor(aya_status)1	1.42442	0.396748	3.59024	0.000330379	0.0382331	12	44	24	337	0.00107265	0.214286	0.066482	1	0.0955172	factor(aya_status)1	1.5118	0.412356	3.66623	0.000246148	0.0393241	12	44	24	337	0.00107265	0.214286	0.066482	1	0.0955172	aya,,,,	aya,,,,
TP53	Ovarian Cancer	factor(aya_status)1	-1.03658	0.289113	-3.58536	0.000336611	0.0386243	35	113	2159	666	3.37663e-39	0.236486	0.764248	0	5.8024e-36	factor(aya_status)1	-1.04536	0.292377	-3.57537	0.00034973	0.0501655	35	113	2159	666	3.37663e-39	0.236486	0.764248	0	5.8024e-36	aya,histological subtype,,,	,histological subtype,,,
KEAP1	Non-Small Cell Lung Cancer	factor(aya_status)1	-2.53804	0.713417	-3.55758	0.000374286	0.0415425	2	159	1408	8514	1.47127e-08	0.0124224	0.141907	0	5.74597e-06	factor(aya_status)1	-2.44185	0.714251	-3.41876	0.000629083	0.0769644	2	159	1408	8514	1.47127e-08	0.0124224	0.141907	0	5.74597e-06	aya,,metastasis,sex,	,,metastasis,sex,race
RUNX1	Breast Cancer	factor(aya_status)1	-1.28781	0.362286	-3.55467	0.000378459	0.041778	8	906	265	7456	2.99074e-06	0.00875274	0.034322	0	0.000694499	factor(aya_status)1	-1.28573	0.362638	-3.54548	0.0003919	0.0544427	8	906	265	7456	2.99074e-06	0.00875274	0.034322	0	0.000694499	aya,,,,	,,,,,undetermined
GRIN2A	Melanoma	factor(aya_status)1	-0.957445	0.269526	-3.55233	0.00038183	0.0419732	17	141	395	1337	0.000259926	0.107595	0.22806	0	0.0319041	factor(aya_status)1	-0.928168	0.270868	-3.42664	0.000611091	0.0754349	17	141	395	1337	0.000259926	0.107595	0.22806	0	0.0319041	aya,histological subtype,,sex,	,histological subtype,,sex,
RB1	CNS Cancer	factor(aya_status)1	2.98852	0.85207	3.50737	0.000452565	0.0479101	7	80	1	350	6.69607e-05	0.0804598	0.002849	1	0.0104605	factor(aya_status)1	2.90881	0.862178	3.37379	0.000741396	0.0863969	7	80	1	350	6.69607e-05	0.0804598	0.002849	1	0.0104605	aya,,,,	,,,,,undetermined
BRAF	Melanoma	factor(aya_status)1	0.516004	0.147972	3.48716	0.000488177	0.0505894	105	126	833	1736	8.12879e-05	0.454545	0.324251	1	0.0122531	factor(aya_status)1	0.536609	0.148581	3.61155	0.000304373	0.0453278	105	126	833	1736	8.12879e-05	0.454545	0.324251	1	0.0122531	,histological subtype,,,	aya,histological subtype,,,
ERBB4	Melanoma	factor(aya_status)1	-0.843187	0.243123	-3.46815	0.000524058	0.0532376	20	211	444	2124	0.00041565	0.0865801	0.172897	0	0.0457854	factor(aya_status)1	-0.835647	0.243643	-3.42979	0.000604044	0.0750332	20	211	444	2124	0.00041565	0.0865801	0.172897	0	0.0457854	,histological subtype,,,	,histological subtype,,,
KMT2D	Melanoma	factor(aya_status)1	-0.78196	0.225781	-3.46335	0.000533491	0.0538749	24	191	506	1906	0.00036225	0.111628	0.209784	0	0.0414994	factor(aya_status)1	-0.770793	0.226819	-3.39827	0.000678126	0.0815128	24	191	506	1906	0.00036225	0.111628	0.209784	0	0.0414994	,histological subtype,,,	,histological subtype,,,
CARD11	Melanoma	factor(aya_status)1	-1.20074	0.34899	-3.44062	0.000580384	0.057487	9	206	284	2086	0.000184803	0.0418605	0.119831	0	0.0244282	factor(aya_status)1	-1.17648	0.349554	-3.36567	0.000763589	0.0883833	9	206	284	2086	0.000184803	0.0418605	0.119831	0	0.0244282	,,,,undetermined	,,,,,undetermined
NOTCH3	Melanoma	factor(aya_status)1	-1.09556	0.333721	-3.28285	0.00102762	0.0870657	10	186	315	1908	0.000115104	0.0510204	0.1417	0	0.0162127	factor(aya_status)1	-1.0952	0.334261	-3.27648	0.0010511	0.109653	10	186	315	1908	0.000115104	0.0510204	0.1417	0	0.0162127	,histological subtype,,sex,	,,,sex,
PIK3C2G	Melanoma	factor(aya_status)1	-1.47501	0.465061	-3.17165	0.00151577	0.11509	5	133	216	1366	0.000271413	0.0362319	0.136536	0	0.0328448	factor(aya_status)1	-1.47636	0.465323	-3.17277	0.00150993	0.140932	5	133	216	1366	0.000271413	0.0362319	0.136536	0	0.0328448	,,,sex,	,,,sex,
SETD2	Renal Cell Carcinoma	factor(aya_status)1	-1.46116	0.470845	-3.10328	0.00191392	0.136571	5	127	287	1087	1.01494e-07	0.0378788	0.208879	0	3.35397e-05	factor(aya_status)1	-1.47532	0.473519	-3.11565	0.00183537	0.160207	5	127	287	1087	1.01494e-07	0.0378788	0.208879	0	3.35397e-05	,,metastasis,,	,,metastasis,,
EGFR	Melanoma	factor(aya_status)1	-3.02575	1.00554	-3.00907	0.00262045	0.168662	1	230	211	2357	1.84716e-07	0.004329	0.0821651	0	5.47269e-05	factor(aya_status)1	-3.02633	1.00584	-3.00876	0.0026232	0.204075	1	230	211	2357	1.84716e-07	0.004329	0.0821651	0	5.47269e-05	,,,,undetermined	,,,,,undetermined
PTPN11	Glioma	factor(aya_status)1	-0.711672	0.240016	-2.9651	0.00302589	0.186048	21	1021	189	3322	1.24693e-06	0.0201536	0.0538308	0	0.000324655	factor(aya_status)1	-0.718253	0.240187	-2.99039	0.00278622	0.211261	21	1021	189	3322	1.24693e-06	0.0201536	0.0538308	0	0.000324655	,,,,undetermined	,,,,,undetermined
KRAS	Cancer of Unknown Primary	factor(aya_status)1	-0.919075	0.314379	-2.92346	0.00346164	0.20326	12	126	476	1827	0.000275957	0.0869565	0.206687	0	0.0329308	factor(aya_status)1	-0.884944	0.315365	-2.8061	0.00501454	0.300592	12	126	476	1827	0.000275957	0.0869565	0.206687	0	0.0329308	,histological subtype,,,	,histological subtype,,,
NF1	Glioma	factor(aya_status)1	-0.347685	0.119178	-2.91736	0.00353012	0.206229	100	953	598	2955	1.48595e-09	0.0949668	0.168308	0	6.71963e-07	factor(aya_status)1	-0.336878	0.119355	-2.82249	0.00476519	0.291886	100	953	598	2955	1.48595e-09	0.0949668	0.168308	0	6.71963e-07	,histological subtype,,,	,histological subtype,,,
TP53	Cancer of Unknown Primary	factor(aya_status)1	-0.562227	0.193353	-2.90778	0.00364005	0.210859	46	92	1137	1159	0.00021582	0.333333	0.495209	0	0.0276226	factor(aya_status)1	-0.560349	0.193965	-2.88891	0.00386579	0.260024	46	92	1137	1159	0.00021582	0.333333	0.495209	0	0.0276226	,histological subtype,,,	,histological subtype,,,
KIT	Melanoma	factor(aya_status)1	-1.68018	0.58885	-2.85332	0.00432644	0.234545	3	228	186	2383	9.64785e-05	0.012987	0.0724017	0	0.0140499	factor(aya_status)1	-1.67573	0.589199	-2.84407	0.00445406	0.281289	3	228	186	2383	9.64785e-05	0.012987	0.0724017	0	0.0140499	,histological subtype,,,	,,,,,undetermined
ATRX	Soft Tissue Sarcoma	factor(aya_status)1	-0.746222	0.269538	-2.76852	0.00563117	0.275967	17	552	176	1588	1.27678e-08	0.029877	0.0997732	0	5.22383e-06	factor(aya_status)1	-0.70674	0.271523	-2.60287	0.00924459	0.42853	17	552	176	1588	1.27678e-08	0.029877	0.0997732	0	5.22383e-06	,,,,undetermined	,,,,,undetermined
RBM10	Non-Small Cell Lung Cancer	factor(aya_status)1	-1.59358	0.585823	-2.72025	0.00652333	0.301897	3	137	885	7697	0.000359599	0.0214286	0.103123	0	0.0414994	factor(aya_status)1	-1.56471	0.586258	-2.66898	0.00760811	0.385291	3	137	885	7697	0.000359599	0.0214286	0.103123	0	0.0414994	,,metastasis,,	,,metastasis,,
CDKN2A	Soft Tissue Sarcoma	factor(aya_status)1	-2.79078	1.02713	-2.71705	0.00658664	0.303824	1	568	45	1724	7.39215e-05	0.00175747	0.0254381	0	0.0113417	factor(aya_status)1	-2.75963	1.02544	-2.69116	0.00712033	0.371968	1	568	45	1724	7.39215e-05	0.00175747	0.0254381	0	0.0113417	,,,,undetermined	,,,,,undetermined
TP53	Leukemia	factor(aya_status)1	-2.76547	1.01858	-2.71501	0.0066273	0.304554	1	59	79	295	4.83285e-05	0.0166667	0.21123	0	0.00798536	factor(aya_status)1	-2.69784	1.02243	-2.63865	0.00832357	0.404097	1	59	79	295	4.83285e-05	0.0166667	0.21123	0	0.00798536	,,,,undetermined	,,,,,undetermined
TP53	Salivary Gland Cancer	factor(aya_status)1	-2.75523	1.04204	-2.64408	0.00819126	0.349253	1	48	121	351	2.65399e-05	0.0204082	0.256356	0	0.0046537	factor(aya_status)1	-2.74423	1.04486	-2.62641	0.00862901	0.41323	1	48	121	351	2.65399e-05	0.0204082	0.256356	0	0.0046537	,histological subtype,,,	,histological subtype,,,
ERBB2	Melanoma	factor(aya_status)1	-2.45416	1.00735	-2.43625	0.0148405	0.493301	1	230	124	2444	0.000359609	0.004329	0.0482866	0	0.0414994	factor(aya_status)1	-2.4742	1.00762	-2.45549	0.0140693	0.535609	1	230	124	2444	0.000359609	0.004329	0.0482866	0	0.0414994	,,,,undetermined	,,,,,undetermined
STAG2	Glioma	factor(aya_status)1	-0.640703	0.264567	-2.4217	0.0154479	0.505505	17	1018	176	3330	3.9651e-07	0.0164251	0.0501997	0	0.000109897	factor(aya_status)1	-0.651271	0.264994	-2.45769	0.0139835	0.534232	17	1018	176	3330	3.9651e-07	0.0164251	0.0501997	0	0.000109897	,,,,undetermined	,,,,,undetermined
B2M	Mature B-Cell Neoplasms	factor(aya_status)1	0.886568	0.372677	2.37892	0.0173636	0.539433	12	55	41	806	0.000218614	0.179104	0.0484061	1	0.0276226	factor(aya_status)1	0.927501	0.380054	2.44044	0.0146692	0.547507	12	55	41	806	0.000218614	0.179104	0.0484061	1	0.0276226	,histological subtype,,,	,histological subtype,,,
KEAP1	Cancer of Unknown Primary	factor(aya_status)1	-2.33719	1.0085	-2.31749	0.0204772	0.59085	1	136	183	2044	0.000227944	0.00729927	0.0821733	0	0.028384	factor(aya_status)1	-2.24154	1.00948	-2.22048	0.026386	0.739419	1	136	183	2044	0.000227944	0.00729927	0.0821733	0	0.028384	,,,,undetermined	,,,,,undetermined
KRAS	Ovarian Cancer	factor(aya_status)1	-0.548161	0.261613	-2.09532	0.0361429	0.783138	36	112	224	2603	4.15606e-09	0.243243	0.0792359	1	1.78544e-06	factor(aya_status)1	-0.538094	0.261164	-2.06037	0.0393634	0.869379	36	112	224	2603	4.15606e-09	0.243243	0.0792359	1	1.78544e-06	,histological subtype,,,	,histological subtype,,,
TP53	Hepatobiliary Cancer	factor(aya_status)1	-0.601083	0.292947	-2.05185	0.0401841	0.81831	16	96	549	1011	2.30301e-06	0.142857	0.351923	0	0.000565357	factor(aya_status)1	-0.658459	0.294968	-2.2323	0.0255948	0.727306	16	96	549	1011	2.30301e-06	0.142857	0.351923	0	0.000565357	,histological subtype,,,	,histological subtype,,,
GRIN2A	Breast Cancer	factor(aya_status)1	-15.5885	411.268	-0.0379035	0.969765	1	0	673	107	5646	1.60159e-05	0	0.018599	0	0.00295938	factor(aya_status)1	-15.5919	408.72	-0.0381481	0.96957	1	0	673	107	5646	1.60159e-05	0	0.018599	0	0.00295938	,,,,undetermined	,,,,,undetermined
RB1	Soft Tissue Sarcoma	factor(aya_status)1	-0.475491	0.300941	-1.58001	0.114104	1	14	555	123	1646	2.22569e-05	0.0246046	0.0695308	0	0.00398399	factor(aya_status)1	-0.467673	0.303215	-1.54238	0.122981	1	14	555	123	1646	2.22569e-05	0.0246046	0.0695308	0	0.00398399	,,,,undetermined	,,,,,undetermined
TP53	Skin Cancer, Non-Melanoma	factor(aya_status)1	-0.675163	0.629199	-1.07305	0.283248	1	5	26	364	312	3.00582e-05	0.16129	0.538462	0	0.0051652	factor(aya_status)1	-0.589798	0.644952	-0.914484	0.360463	1	5	26	364	312	3.00582e-05	0.16129	0.538462	0	0.0051652	,,,,undetermined	,,,,,undetermined
TP53	Soft Tissue Sarcoma	factor(aya_status)1	-0.252479	0.155441	-1.62428	0.104316	1	73	496	474	1295	1.12523e-12	0.128295	0.267948	0	6.44529e-10	factor(aya_status)1	-0.233453	0.156133	-1.49521	0.134858	1	73	496	474	1295	1.12523e-12	0.128295	0.267948	0	6.44529e-10	,,,,undetermined	,,,,,undetermined
VHL	Renal Cell Carcinoma	factor(aya_status)1	-0.159805	0.296205	-0.539506	0.589538	1	36	96	700	679	2.282e-07	0.272727	0.507614	0	6.53563e-05	factor(aya_status)1	-0.131886	0.301057	-0.438075	0.661332	1	36	96	700	679	2.282e-07	0.272727	0.507614	0	6.53563e-05	,,,,undetermined	,,,,,undetermined
BRAF	Glioma	factor(aya_status)1	0.0950531	0.157558	0.603289	0.546316	1	78	979	118	3439	7.31165e-08	0.0737938	0.033174	1	2.51287e-05	factor(aya_status)1	0.0809227	0.158761	0.509714	0.610252	1	78	979	118	3439	7.31165e-08	0.0737938	0.033174	1	2.51287e-05	,histological subtype,,,	,histological subtype,,,
CTNNB1	Soft Tissue Sarcoma	factor(aya_status)1	0.627428	0.351368	1.78567	0.0741522	1	29	541	28	1742	1.26784e-05	0.0508772	0.0158192	1	0.00247575	factor(aya_status)1	0.644553	0.361075	1.7851	0.0742455	1	29	541	28	1742	1.26784e-05	0.0508772	0.0158192	1	0.00247575	,histological subtype,,,	,histological subtype,,,
PIK3CA	Thyroid Cancer	factor(aya_status)1	-16.3912	741.052	-0.0221189	0.982353	1	0	199	58	1000	5.88852e-05	0	0.0548204	0	0.00954606	factor(aya_status)1	-16.3767	737.466	-0.0222067	0.982283	1	0	199	58	1000	5.88852e-05	0	0.0548204	0	0.00954606	,histological subtype,,,	,histological subtype,,,
PIK3R1	Glioma	factor(aya_status)1	-0.24296	0.151591	-1.60273	0.108994	1	61	974	339	3167	0.000105032	0.0589372	0.0966914	0	0.0150406	factor(aya_status)1	-0.248688	0.152206	-1.63389	0.102283	1	61	974	339	3167	0.000105032	0.0589372	0.0966914	0	0.0150406	,histological subtype,,,	,histological subtype,,,
SMARCA4	Ovarian Cancer	factor(aya_status)1	0.21313	0.471834	0.451706	0.651481	1	12	136	66	2751	0.00038189	0.0810811	0.0234292	1	0.0431737	factor(aya_status)1	0.136403	0.482041	0.28297	0.7772	1	12	136	66	2751	0.00038189	0.0810811	0.0234292	1	0.0431737	,histological subtype,,,	,histological subtype,,,
TET2	Mature T and NK Neoplasms	factor(aya_status)1	-17.4765	1229.42	-0.0142152	0.988658	1	0	25	60	111	9.10186e-05	0	0.350877	0	0.0134833	factor(aya_status)1	-17.3811	1216.88	-0.0142833	0.988604	1	0	25	60	111	9.10186e-05	0	0.350877	0	0.0134833	,histological subtype,,,	,histological subtype,,,
TP53	Endometrial Cancer	factor(aya_status)1	-0.339885	0.34192	-0.99405	0.320199	1	15	48	1285	1498	0.000459133	0.238095	0.461732	0	0.049935	factor(aya_status)1	-0.353808	0.343099	-1.03121	0.30244	1	15	48	1285	1498	0.000459133	0.238095	0.461732	0	0.049935	,histological subtype,,,	,histological subtype,,,
TP53	Thyroid Cancer	factor(aya_status)1	-0.69218	0.460181	-1.50415	0.132543	1	6	193	145	914	2.38402e-06	0.0301508	0.136922	0	0.000568986	factor(aya_status)1	-0.718342	0.463283	-1.55055	0.12101	1	6	193	145	914	2.38402e-06	0.0301508	0.136922	0	0.000568986	,histological subtype,,,	,histological subtype,,,
CDH1	Esophagogastric Cancer	factor(aya_status)1	0.355644	0.259443	1.3708	0.170437	1	26	110	207	2105	0.000402338	0.191176	0.0895329	1	0.0448947	factor(aya_status)1	0.402427	0.262653	1.53216	0.125483	1	26	110	207	2105	0.000402338	0.191176	0.0895329	1	0.0448947	,histological subtype,,sex,	,histological subtype,,sex,

## Sheet: compre_original&site_models
		original results															add Site results
		Logistic model results						Fisher's test results									Logistic model results						Fisher's test results
Gene	Cancer	Factors	Estimate	Std..Error	z.value	P value	FDR	aya_mut	aya_wt	adult_mut	adult_wt	P value	murate_aya	murate_adult	Higher_AYA	FDR	Factors	Estimate	Std..Error	z.value	P value	FDR	aya_mut	aya_wt	adult_mut	adult_wt	P value	murate_aya	murate_adult	Higher_AYA	FDR	Significant Variables_original	Significant Variables_addsite
AKT3	Colorectal Cancer	factor(aya_status)1	1.02151	0.248076	4.11775	3.82597e-05	0.00725184	22	666	73	6132	0.000165546	0.0319767	0.0117647	1	0.0222245	factor(aya_status)1	1.01575	0.24914	4.07701	4.56183e-05	0.00589814	22	666	73	6132	0.000165546	0.0319767	0.0117647	1	0.0222245	aya,,,,	aya,,,,
ARID2	Melanoma	factor(aya_status)1	-1.30001	0.331344	-3.92345	8.72913e-05	0.0140636	10	205	346	2022	1.07493e-05	0.0465116	0.146115	0	0.00218721	factor(aya_status)1	-1.30735	0.331639	-3.9421	8.07727e-05	0.00930742	10	205	346	2022	1.07493e-05	0.0465116	0.146115	0	0.00218721	aya,,,,	aya,,,,
CARD11	Melanoma	factor(aya_status)1	-1.20074	0.34899	-3.44062	0.000580384	0.057487	9	206	284	2086	0.000184803	0.0418605	0.119831	0	0.0244282	factor(aya_status)1	-1.22044	0.349602	-3.49095	0.000481311	0.0359647	9	206	284	2086	0.000184803	0.0418605	0.119831	0	0.0244282	,,,,undetermined	aya,,,,
EP300	Hepatobiliary Cancer	factor(aya_status)1	1.74821	0.45988	3.80144	0.000143858	0.0204598	7	104	29	1515	0.00829376	0.0630631	0.0187824	1	0.391538	factor(aya_status)1	1.7275	0.474682	3.63928	0.000273399	0.0239428	7	104	29	1515	0.00829376	0.0630631	0.0187824	1	0.391538	aya,,,,	aya,,,,
ATRX	Soft Tissue Sarcoma	factor(aya_status)1	-0.746222	0.269538	-2.76852	0.00563117	0.275967	17	552	176	1588	1.27678e-08	0.029877	0.0997732	0	5.22383e-06	factor(aya_status)1	-0.718136	0.27052	-2.65465	0.00793899	0.245178	17	552	176	1588	1.27678e-08	0.029877	0.0997732	0	5.22383e-06	,,,,undetermined	,,,,,undetermined
B2M	Mature B-Cell Neoplasms	factor(aya_status)1	0.886568	0.372677	2.37892	0.0173636	0.539433	12	55	41	806	0.000218614	0.179104	0.0484061	1	0.0276226	factor(aya_status)1	0.883742	0.372697	2.37121	0.0177299	0.398892	12	55	41	806	0.000218614	0.179104	0.0484061	1	0.0276226	,histological subtype,,,	,histological subtype,,,
BRAF	Glioma	factor(aya_status)1	0.0950531	0.157558	0.603289	0.546316	1	78	979	118	3439	7.31165e-08	0.0737938	0.033174	1	2.51287e-05	factor(aya_status)1	0.0626922	0.158871	0.39461	0.69313	1	78	979	118	3439	7.31165e-08	0.0737938	0.033174	1	2.51287e-05	,histological subtype,,,	,histological subtype,,,
FBXW7	Embryonal Tumor	factor(aya_status)1	2.86968	0.726292	3.95114	7.77808e-05	0.0128116	12	45	0	33	0.00316322	0.210526	0	1	0.198383	factor(aya_status)1	2.95803	0.730525	4.04918	5.13969e-05	0.00652959	12	45	0	33	0.00316322	0.210526	0	1	0.198383	aya,,,,	aya,,,,
FH	Renal Cell Carcinoma	factor(aya_status)1	1.98702	0.483535	4.10935	3.96772e-05	0.0074656	10	121	18	1349	6.25122e-05	0.0763359	0.0131675	1	0.00994638	factor(aya_status)1	1.93401	0.492989	3.92304	8.74391e-05	0.00996199	10	121	18	1349	6.25122e-05	0.0763359	0.0131675	1	0.00994638	aya,,,,	aya,,,,
FOXA1	Breast Cancer	factor(aya_status)1	-1.46586	0.386099	-3.79659	0.000146701	0.0207782	7	755	283	5971	6.50656e-08	0.00918635	0.045251	0	2.32935e-05	factor(aya_status)1	-1.46161	0.386145	-3.78514	0.000153622	0.0153112	7	755	283	5971	6.50656e-08	0.00918635	0.045251	0	2.32935e-05	aya,,,,	aya,,,,
KDM5A	Glioma	factor(aya_status)1	1.00313	0.255327	3.92882	8.53625e-05	0.0139049	27	813	51	2791	0.0194247	0.0321429	0.0179451	1	0.598875	factor(aya_status)1	0.989515	0.255651	3.87056	0.000108584	0.0118273	27	813	51	2791	0.0194247	0.0321429	0.0179451	1	0.598875	aya,,,,	aya,,,,
KIT	Gastrointestinal Stromal Tumor	factor(aya_status)1	-1.25509	0.266937	-4.70182	2.57848e-06	0.000784277	32	32	601	164	1.83305e-06	0.5	0.785621	0	0.000463223	factor(aya_status)1	-1.26951	0.268926	-4.72068	2.35056e-06	0.000497221	32	32	601	164	1.83305e-06	0.5	0.785621	0	0.000463223	aya,,,,	aya,,,,
CDH1	Esophagogastric Cancer	factor(aya_status)1	0.355644	0.259443	1.3708	0.170437	1	26	110	207	2105	0.000402338	0.191176	0.0895329	1	0.0448947	factor(aya_status)1	0.396531	0.261842	1.51439	0.129927	1	26	110	207	2105	0.000402338	0.191176	0.0895329	1	0.0448947	,histological subtype,,sex,	,histological subtype,,sex,
CDKN2A	Soft Tissue Sarcoma	factor(aya_status)1	-2.79078	1.02713	-2.71705	0.00658664	0.303824	1	568	45	1724	7.39215e-05	0.00175747	0.0254381	0	0.0113417	factor(aya_status)1	-2.77069	1.03018	-2.68954	0.00715516	0.229444	1	568	45	1724	7.39215e-05	0.00175747	0.0254381	0	0.0113417	,,,,undetermined	,,,,,undetermined
MAP3K1	Breast Cancer	factor(aya_status)1	-1.25972	0.22052	-5.71249	1.11332e-08	6.79262e-06	22	892	615	7139	1.10978e-11	0.02407	0.0793139	0	5.60898e-09	factor(aya_status)1	-1.25841	0.220549	-5.70583	1.15775e-08	5.26244e-06	22	892	615	7139	1.10978e-11	0.02407	0.0793139	0	5.60898e-09	aya,,,,	aya,,,,
CTNNB1	Soft Tissue Sarcoma	factor(aya_status)1	0.627428	0.351368	1.78567	0.0741522	1	29	541	28	1742	1.26784e-05	0.0508772	0.0158192	1	0.00247575	factor(aya_status)1	0.824272	0.367236	2.24453	0.0247984	0.482245	29	541	28	1742	1.26784e-05	0.0508772	0.0158192	1	0.00247575	,histological subtype,,,	,histological subtype,,,
MSH2	Colorectal Cancer	factor(aya_status)1	0.707355	0.182407	3.87789	0.000105365	0.0161438	39	649	177	6028	0.000196048	0.056686	0.0285254	1	0.0255219	factor(aya_status)1	0.717132	0.182883	3.92126	8.80863e-05	0.010001	39	649	177	6028	0.000196048	0.056686	0.0285254	1	0.0255219	aya,,,,	aya,,,,
EGFR	Melanoma	factor(aya_status)1	-3.02575	1.00554	-3.00907	0.00262045	0.168662	1	230	211	2357	1.84716e-07	0.004329	0.0821651	0	5.47269e-05	factor(aya_status)1	-3.03974	1.00643	-3.02033	0.00252497	0.115812	1	230	211	2357	1.84716e-07	0.004329	0.0821651	0	5.47269e-05	,,,,undetermined	,,,,,undetermined
NRAS	Melanoma	factor(aya_status)1	-0.765649	0.198866	-3.85007	0.000118083	0.0173786	32	199	631	1938	0.000138388	0.138528	0.245621	0	0.0191779	factor(aya_status)1	-0.76838	0.199574	-3.85011	0.000118064	0.0125886	32	199	631	1938	0.000138388	0.138528	0.245621	0	0.0191779	aya,,,,	aya,,,,
ERBB2	Melanoma	factor(aya_status)1	-2.45416	1.00735	-2.43625	0.0148405	0.493301	1	230	124	2444	0.000359609	0.004329	0.0482866	0	0.0414994	factor(aya_status)1	-2.46159	1.00783	-2.44247	0.0145873	0.358965	1	230	124	2444	0.000359609	0.004329	0.0482866	0	0.0414994	,,,,undetermined	,,,,,undetermined
PIK3CA	Breast Cancer	factor(aya_status)1	-0.748732	0.0861506	-8.69096	3.59378e-18	8.82281e-15	186	729	2857	4919	2.02686e-24	0.203279	0.367413	0	2.17685e-21	factor(aya_status)1	-0.747701	0.0862163	-8.67239	4.23158e-18	9.1126e-15	186	729	2857	4919	2.02686e-24	0.203279	0.367413	0	2.17685e-21	aya,,,,	aya,,,,
PIK3CA	Cervical Cancer	factor(aya_status)1	-1.31607	0.333273	-3.94893	7.84998e-05	0.0129094	12	93	107	228	1.61884e-05	0.114286	0.319403	0	0.00295938	factor(aya_status)1	-1.37715	0.337326	-4.08256	4.45424e-05	0.00580474	12	93	107	228	1.61884e-05	0.114286	0.319403	0	0.00295938	aya,,,,	aya,,,,
PTCH1	Embryonal Tumor	factor(aya_status)1	1.46852	0.40543	3.62213	0.000292188	0.0349606	18	39	5	28	0.131504	0.315789	0.151515	1	1	factor(aya_status)1	1.48967	0.417784	3.56564	0.000362974	0.0293964	18	39	5	28	0.131504	0.315789	0.151515	1	1	aya,,,,	aya,,,,
ROS1	Melanoma	factor(aya_status)1	-0.932981	0.22882	-4.07736	4.55491e-05	0.00822548	23	199	544	1916	1.52012e-05	0.103604	0.221138	0	0.00290241	factor(aya_status)1	-0.946993	0.229959	-4.1181	3.82012e-05	0.00514127	23	199	544	1916	1.52012e-05	0.103604	0.221138	0	0.00290241	aya,,,,	aya,,,,
RUNX1	Breast Cancer	factor(aya_status)1	-1.28781	0.362286	-3.55467	0.000378459	0.041778	8	906	265	7456	2.99074e-06	0.00875274	0.034322	0	0.000694499	factor(aya_status)1	-1.28697	0.36239	-3.55134	0.000383268	0.030606	8	906	265	7456	2.99074e-06	0.00875274	0.034322	0	0.000694499	aya,,,,	aya,,,,
SDHA	Glioma	factor(aya_status)1	1.01193	0.275507	3.67298	0.000239735	0.0300809	25	782	39	2920	0.00111073	0.0309789	0.0131801	1	0.0955172	factor(aya_status)1	0.979246	0.278682	3.51384	0.000441674	0.033791	25	782	39	2920	0.00111073	0.0309789	0.0131801	1	0.0955172	aya,,,,	aya,,,,
GRIN2A	Breast Cancer	factor(aya_status)1	-15.5885	411.268	-0.0379035	0.969765	1	0	673	107	5646	1.60159e-05	0	0.018599	0	0.00295938	factor(aya_status)1	-15.5853	409.568	-0.0380529	0.969645	1	0	673	107	5646	1.60159e-05	0	0.018599	0	0.00295938	,,,,undetermined	,,,,,undetermined
SMO	Embryonal Tumor	factor(aya_status)1	2.69268	0.678314	3.96967	7.19727e-05	0.0119696	13	44	1	32	0.0145281	0.22807	0.030303	1	0.523434	factor(aya_status)1	2.91106	0.712794	4.08401	4.42649e-05	0.00578004	13	44	1	32	0.0145281	0.22807	0.030303	1	0.523434	aya,,,,	aya,,,,
TBX3	Breast Cancer	factor(aya_status)1	-1.23328	0.342416	-3.6017	0.000316142	0.0370008	9	664	328	5506	6.36305e-08	0.013373	0.0562221	0	2.32935e-05	factor(aya_status)1	-1.23905	0.342495	-3.61771	0.000297223	0.0252221	9	664	328	5506	6.36305e-08	0.013373	0.0562221	0	2.32935e-05	aya,,,,	aya,,,,
WT1	Leukemia	factor(aya_status)1	1.42442	0.396748	3.59024	0.000330379	0.0382331	12	44	24	337	0.00107265	0.214286	0.066482	1	0.0955172	factor(aya_status)1	1.42269	0.405518	3.50833	0.000450929	0.0342993	12	44	24	337	0.00107265	0.214286	0.066482	1	0.0955172	aya,,,,	aya,,,,
CCNE1	Ovarian Cancer	factor(aya_status)1	2.25193	0.65378	3.44448	0.000572151	0.0568902	5	143	14	2811	0.00188399	0.0337838	0.00495575	1	0.138186	factor(aya_status)1	2.34541	0.657637	3.56642	0.000361897	0.0293454	5	143	14	2811	0.00188399	0.0337838	0.00495575	1	0.138186	NA	aya,,,,
DKC1	Colorectal Cancer	factor(aya_status)1	1.96665	0.582831	3.37431	0.000740015	0.0678858	5	123	8	1299	0.00374322	0.0390625	0.00612089	1	0.220286	factor(aya_status)1	1.96665	0.582831	3.37431	0.000740015	0.0492362	5	123	8	1299	0.00374322	0.0390625	0.00612089	1	0.220286	NA	aya,,,,
KEAP1	Cancer of Unknown Primary	factor(aya_status)1	-2.33719	1.0085	-2.31749	0.0204772	0.59085	1	136	183	2044	0.000227944	0.00729927	0.0821733	0	0.028384	factor(aya_status)1	-2.32693	1.00883	-2.30657	0.0210788	0.441415	1	136	183	2044	0.000227944	0.00729927	0.0821733	0	0.028384	,,,,undetermined	,,,,,undetermined
PIK3R2	Ovarian Cancer	factor(aya_status)1	2.5048	0.72859	3.43787	0.0005863	0.0576851	4	91	13	1731	0.00946489	0.0421053	0.00745413	1	0.417038	factor(aya_status)1	2.62866	0.749476	3.50732	0.00045264	0.0344095	4	91	13	1731	0.00946489	0.0421053	0.00745413	1	0.417038	NA	aya,,,,
SDHA	Gastrointestinal Stromal Tumor	factor(aya_status)1	1.82392	0.532616	3.42445	0.000616048	0.0595147	6	56	10	681	0.00102206	0.0967742	0.0144718	1	0.0924369	factor(aya_status)1	1.9105	0.541286	3.52956	0.000416256	0.0323841	6	56	10	681	0.00102206	0.0967742	0.0144718	1	0.0924369	NA	aya,,,,
KIT	Melanoma	factor(aya_status)1	-1.68018	0.58885	-2.85332	0.00432644	0.234545	3	228	186	2383	9.64785e-05	0.012987	0.0724017	0	0.0140499	factor(aya_status)1	-1.66344	0.589365	-2.82242	0.00476627	0.177293	3	228	186	2383	9.64785e-05	0.012987	0.0724017	0	0.0140499	,histological subtype,,,	,histological subtype,,,
GATA3	Breast Cancer	factor(aya_status)1	0.336949	0.0932629	3.6129	0.000302791	0.0359276	167	747	979	6775	5.12012e-06	0.182713	0.126257	1	0.00112198	factor(aya_status)1	0.341881	0.0934848	3.65708	0.000255109	0.0227197	167	747	979	6775	5.12012e-06	0.182713	0.126257	1	0.00112198	aya,,,,	aya,,,,site
KMT2C	Breast Cancer	factor(aya_status)1	-0.927904	0.218477	-4.24714	2.16513e-05	0.00456541	23	630	510	5123	1.60312e-07	0.0352221	0.0905379	0	4.91928e-05	factor(aya_status)1	-0.925691	0.218742	-4.23189	2.31736e-05	0.00338612	23	630	510	5123	1.60312e-07	0.0352221	0.0905379	0	4.91928e-05	aya,,,,	aya,,,,site
KRAS	Cancer of Unknown Primary	factor(aya_status)1	-0.919075	0.314379	-2.92346	0.00346164	0.20326	12	126	476	1827	0.000275957	0.0869565	0.206687	0	0.0329308	factor(aya_status)1	-0.941757	0.315543	-2.98456	0.0028399	0.125355	12	126	476	1827	0.000275957	0.0869565	0.206687	0	0.0329308	,histological subtype,,,	,histological subtype,,,
FLT1	Melanoma	factor(aya_status)1	-1.41219	0.367758	-3.83999	0.000123039	0.0178941	8	207	327	2085	5.22337e-06	0.0372093	0.135572	0	0.00112198	factor(aya_status)1	-1.41914	0.368095	-3.85537	0.000115554	0.0123913	8	207	327	2085	5.22337e-06	0.0372093	0.135572	0	0.00112198	aya,,,,	aya,,,sex,
KRAS	Ovarian Cancer	factor(aya_status)1	-0.548161	0.261613	-2.09532	0.0361429	0.783138	36	112	224	2603	4.15606e-09	0.243243	0.0792359	1	1.78544e-06	factor(aya_status)1	-0.548337	0.26488	-2.07013	0.0384399	0.607025	36	112	224	2603	4.15606e-09	0.243243	0.0792359	1	1.78544e-06	,histological subtype,,,	,histological subtype,,,
STK11	Non-Small Cell Lung Cancer	factor(aya_status)1	-1.85931	0.508071	-3.65955	0.000252659	0.0313123	4	164	1511	9431	6.66314e-07	0.0238095	0.138092	0	0.000178905	factor(aya_status)1	-1.84203	0.5082	-3.62462	0.000289382	0.0248732	4	164	1511	9431	6.66314e-07	0.0238095	0.138092	0	0.000178905	aya,,,sex,	aya,,,sex,
TP53	Breast Cancer	factor(aya_status)1	0.376121	0.071481	5.26183	1.42628e-07	6.84025e-05	481	433	3134	4623	2.34657e-12	0.526258	0.404022	1	1.26011e-09	factor(aya_status)1	0.377639	0.0717245	5.26513	1.40092e-07	4.64716e-05	481	433	3134	4623	2.34657e-12	0.526258	0.404022	1	1.26011e-09	aya,histological subtype,,sex,	aya,,,sex,site
CBFB	Breast Cancer	factor(aya_status)1	-1.25657	0.325191	-3.86409	0.000111505	0.01676	10	796	292	6486	3.46856e-06	0.0124069	0.0430806	0	0.00078426	factor(aya_status)1	-1.24901	0.325341	-3.83909	0.000123492	0.013009	10	796	292	6486	3.46856e-06	0.0124069	0.0430806	0	0.00078426	aya,,metastasis,,	aya,,metastasis,,
KEAP1	Non-Small Cell Lung Cancer	factor(aya_status)1	-2.53804	0.713417	-3.55758	0.000374286	0.0415425	2	159	1408	8514	1.47127e-08	0.0124224	0.141907	0	5.74597e-06	factor(aya_status)1	-2.51455	0.713504	-3.52422	0.000424724	0.0328506	2	159	1408	8514	1.47127e-08	0.0124224	0.141907	0	5.74597e-06	aya,,metastasis,sex,	aya,,metastasis,sex,site
ALK	Melanoma	factor(aya_status)1	-1.32235	0.367075	-3.60241	0.000315286	0.0369426	8	223	299	2269	3.64694e-05	0.034632	0.116433	0	0.00614402	factor(aya_status)1	-1.31945	0.367624	-3.58913	0.000331778	0.0274453	8	223	299	2269	3.64694e-05	0.034632	0.116433	0	0.00614402	aya,histological subtype,,,	aya,histological subtype,,,
NF1	Glioma	factor(aya_status)1	-0.347685	0.119178	-2.91736	0.00353012	0.206229	100	953	598	2955	1.48595e-09	0.0949668	0.168308	0	6.71963e-07	factor(aya_status)1	-0.348329	0.119408	-2.91712	0.00353278	0.144461	100	953	598	2955	1.48595e-09	0.0949668	0.168308	0	6.71963e-07	,histological subtype,,,	,histological subtype,,,
ATRX	Glioma	factor(aya_status)1	1.62913	0.0925986	17.5935	2.76497e-69	7.12746e-65	427	608	440	3066	8.88155e-84	0.41256	0.125499	1	3.81551e-80	factor(aya_status)1	1.62834	0.0930085	17.5075	1.25697e-68	4.12794e-64	427	608	440	3066	8.88155e-84	0.41256	0.125499	1	3.81551e-80	aya,histological subtype,metastasis,,	aya,histological subtype,,,
BRAF	Melanoma	factor(aya_status)1	0.516004	0.147972	3.48716	0.000488177	0.0505894	105	126	833	1736	8.12879e-05	0.454545	0.324251	1	0.0122531	factor(aya_status)1	0.54968	0.150051	3.6633	0.00024899	0.0222957	105	126	833	1736	8.12879e-05	0.454545	0.324251	1	0.0122531	,histological subtype,,,	aya,histological subtype,,,
BRAF	Thyroid Cancer	factor(aya_status)1	-0.688401	0.183002	-3.76172	0.000168751	0.0228647	75	124	476	583	0.0618084	0.376884	0.449481	0	0.920377	factor(aya_status)1	-0.737757	0.18516	-3.98443	6.76427e-05	0.00810296	75	124	476	583	0.0618084	0.376884	0.449481	0	0.920377	aya,histological subtype,,,	aya,histological subtype,,,
CDH1	Breast Cancer	factor(aya_status)1	-1.84684	0.296352	-6.23192	4.60745e-10	3.86243e-07	14	900	1165	6591	5.71349e-42	0.0153173	0.150206	0	1.22726e-38	factor(aya_status)1	-1.85061	0.2966	-6.23942	4.39204e-10	2.84211e-07	14	900	1165	6591	5.71349e-42	0.0153173	0.150206	0	1.22726e-38	aya,histological subtype,,,	aya,histological subtype,,,
PIK3C2G	Melanoma	factor(aya_status)1	-1.47501	0.465061	-3.17165	0.00151577	0.11509	5	133	216	1366	0.000271413	0.0362319	0.136536	0	0.0328448	factor(aya_status)1	-1.50876	0.467689	-3.22598	0.0012554	0.0712672	5	133	216	1366	0.000271413	0.0362319	0.136536	0	0.0328448	,,,sex,	,histological subtype,,sex,
EGFR	Glioma	factor(aya_status)1	-0.985283	0.154305	-6.38528	1.71085e-10	1.57506e-07	52	1005	628	2929	1.94988e-29	0.0491958	0.176553	0	2.39334e-26	factor(aya_status)1	-0.989436	0.154626	-6.39889	1.56511e-10	1.12965e-07	52	1005	628	2929	1.94988e-29	0.0491958	0.176553	0	2.39334e-26	aya,histological subtype,,,	aya,histological subtype,,,
ERBB4	Melanoma	factor(aya_status)1	-0.843187	0.243123	-3.46815	0.000524058	0.0532376	20	211	444	2124	0.00041565	0.0865801	0.172897	0	0.0457854	factor(aya_status)1	-0.845264	0.243751	-3.46774	0.000524859	0.0379746	20	211	444	2124	0.00041565	0.0865801	0.172897	0	0.0457854	,histological subtype,,,	aya,histological subtype,,,
PIK3CA	Thyroid Cancer	factor(aya_status)1	-16.3912	741.052	-0.0221189	0.982353	1	0	199	58	1000	5.88852e-05	0	0.0548204	0	0.00954606	factor(aya_status)1	-16.2972	727.29	-0.0224081	0.982122	1	0	199	58	1000	5.88852e-05	0	0.0548204	0	0.00954606	,histological subtype,,,	,histological subtype,,,
PIK3R1	Glioma	factor(aya_status)1	-0.24296	0.151591	-1.60273	0.108994	1	61	974	339	3167	0.000105032	0.0589372	0.0966914	0	0.0150406	factor(aya_status)1	-0.243883	0.151816	-1.60644	0.108177	0.988315	61	974	339	3167	0.000105032	0.0589372	0.0966914	0	0.0150406	,histological subtype,,,	,histological subtype,,,
H3F3A	Glioma	factor(aya_status)1	1.42134	0.196023	7.25088	4.14086e-13	5.84888e-10	67	937	27	3360	8.32345e-24	0.0667331	0.00797166	1	7.94612e-21	factor(aya_status)1	1.38936	0.196584	7.06749	1.57759e-12	1.61903e-09	67	937	27	3360	8.32345e-24	0.0667331	0.00797166	1	7.94612e-21	aya,histological subtype,,,	aya,histological subtype,,,
IDH2	Glioma	factor(aya_status)1	0.75878	0.210458	3.60538	0.000311699	0.036689	45	1010	62	3495	1.09462e-05	0.042654	0.0174304	1	0.00218721	factor(aya_status)1	0.744397	0.210904	3.52956	0.000416253	0.0323841	45	1010	62	3495	1.09462e-05	0.042654	0.0174304	1	0.00218721	aya,histological subtype,,,	aya,histological subtype,,,
PTPN11	Glioma	factor(aya_status)1	-0.711672	0.240016	-2.9651	0.00302589	0.186048	21	1021	189	3322	1.24693e-06	0.0201536	0.0538308	0	0.000324655	factor(aya_status)1	-0.722754	0.241361	-2.99449	0.00274901	0.122495	21	1021	189	3322	1.24693e-06	0.0201536	0.0538308	0	0.000324655	,,,,undetermined	,,,,,undetermined
KRAS	Pancreatic Cancer	factor(aya_status)1	-1.61323	0.281809	-5.72455	1.03708e-08	6.40327e-06	36	71	2711	704	1.78208e-23	0.336449	0.793851	0	1.53116e-20	factor(aya_status)1	-1.58566	0.283273	-5.59766	2.1726e-08	9.17675e-06	36	71	2711	704	1.78208e-23	0.336449	0.793851	0	1.53116e-20	aya,histological subtype,,,	aya,histological subtype,,,
RB1	CNS Cancer	factor(aya_status)1	2.98852	0.85207	3.50737	0.000452565	0.0479101	7	80	1	350	6.69607e-05	0.0804598	0.002849	1	0.0104605	factor(aya_status)1	2.99542	0.946114	3.16603	0.00154535	0.0821867	7	80	1	350	6.69607e-05	0.0804598	0.002849	1	0.0104605	aya,,,,	,,,,,undetermined
RB1	Soft Tissue Sarcoma	factor(aya_status)1	-0.475491	0.300941	-1.58001	0.114104	1	14	555	123	1646	2.22569e-05	0.0246046	0.0695308	0	0.00398399	factor(aya_status)1	-0.482063	0.302223	-1.59506	0.110699	0.999799	14	555	123	1646	2.22569e-05	0.0246046	0.0695308	0	0.00398399	,,,,undetermined	,,,,,undetermined
RBM10	Non-Small Cell Lung Cancer	factor(aya_status)1	-1.59358	0.585823	-2.72025	0.00652333	0.301897	3	137	885	7697	0.000359599	0.0214286	0.103123	0	0.0414994	factor(aya_status)1	-1.58165	0.585999	-2.69907	0.00695331	0.224644	3	137	885	7697	0.000359599	0.0214286	0.103123	0	0.0414994	,,metastasis,,	,,metastasis,,
MEN1	Pancreatic Cancer	factor(aya_status)1	-1.58071	0.427992	-3.69331	0.000221351	0.0283525	7	96	185	3184	0.511115	0.0679612	0.0549124	1	1	factor(aya_status)1	-1.62115	0.429566	-3.77393	0.000160697	0.0158837	7	96	185	3184	0.511115	0.0679612	0.0549124	1	1	aya,histological subtype,,,	aya,histological subtype,,,
NF1	Colorectal Cancer	factor(aya_status)1	0.680444	0.144162	4.72	2.3584e-06	0.000728385	64	643	314	6275	6.3746e-06	0.0905233	0.0476552	1	0.00133587	factor(aya_status)1	0.666021	0.144795	4.59976	4.22977e-06	0.000822274	64	643	314	6275	6.3746e-06	0.0905233	0.0476552	1	0.00133587	aya,,,,	aya,histological subtype,,,
PBRM1	Renal Cell Carcinoma	factor(aya_status)1	-2.00785	0.474167	-4.23448	2.29078e-05	0.00478146	5	124	403	884	5.86668e-14	0.0387597	0.313131	0	3.87742e-11	factor(aya_status)1	-2.01666	0.474819	-4.24722	2.16441e-05	0.00320182	5	124	403	884	5.86668e-14	0.0387597	0.313131	0	3.87742e-11	aya,histological subtype,,,	aya,histological subtype,,,
SETD2	Renal Cell Carcinoma	factor(aya_status)1	-1.46116	0.470845	-3.10328	0.00191392	0.136571	5	127	287	1087	1.01494e-07	0.0378788	0.208879	0	3.35397e-05	factor(aya_status)1	-1.45711	0.471396	-3.09105	0.00199452	0.0987576	5	127	287	1087	1.01494e-07	0.0378788	0.208879	0	3.35397e-05	,,metastasis,,	,,metastasis,,
SMARCA4	Ovarian Cancer	factor(aya_status)1	0.21313	0.471834	0.451706	0.651481	1	12	136	66	2751	0.00038189	0.0810811	0.0234292	1	0.0431737	factor(aya_status)1	0.299073	0.485694	0.615764	0.53805	1	12	136	66	2751	0.00038189	0.0810811	0.0234292	1	0.0431737	,histological subtype,,,	,histological subtype,,,site
PTEN	Glioma	factor(aya_status)1	-1.12083	0.141044	-7.94665	1.91628e-15	3.29316e-12	64	978	1073	2438	6.73253e-70	0.0614203	0.305611	0	1.9282e-66	factor(aya_status)1	-1.14219	0.143358	-7.96742	1.62022e-15	2.41859e-12	64	978	1073	2438	6.73253e-70	0.0614203	0.305611	0	1.9282e-66	aya,histological subtype,,,	aya,histological subtype,,,
PTPRT	Melanoma	factor(aya_status)1	-1.07186	0.279065	-3.8409	0.000122586	0.0178783	16	122	382	1115	0.000163976	0.115942	0.255177	0	0.0222245	factor(aya_status)1	-1.06972	0.279178	-3.83169	0.000127267	0.0132389	16	122	382	1115	0.000163976	0.115942	0.255177	0	0.0222245	aya,histological subtype,,,	aya,histological subtype,,,
STAG2	Glioma	factor(aya_status)1	-0.640703	0.264567	-2.4217	0.0154479	0.505505	17	1018	176	3330	3.9651e-07	0.0164251	0.0501997	0	0.000109897	factor(aya_status)1	-0.652519	0.264306	-2.4688	0.0135566	0.343722	17	1018	176	3330	3.9651e-07	0.0164251	0.0501997	0	0.000109897	,,,,undetermined	,,,,,undetermined
SOCS1	Mature B-Cell Neoplasms	factor(aya_status)1	1.17139	0.310088	3.77761	0.000158339	0.0218853	20	52	55	800	1.43663e-07	0.277778	0.0643275	1	4.57167e-05	factor(aya_status)1	1.16259	0.31136	3.73393	0.000188517	0.017945	20	52	55	800	1.43663e-07	0.277778	0.0643275	1	4.57167e-05	aya,histological subtype,,,	aya,histological subtype,,,
TP53	Glioma	factor(aya_status)1	1.32639	0.089576	14.8075	1.31069e-49	1.50163e-45	563	479	1127	2384	8.20228e-37	0.540307	0.320991	1	1.17457e-33	factor(aya_status)1	1.3393	0.090039	14.8747	4.81449e-50	7.02712e-46	563	479	1127	2384	8.20228e-37	0.540307	0.320991	1	1.17457e-33	aya,histological subtype,,,	aya,histological subtype,,,
TET2	Mature T and NK Neoplasms	factor(aya_status)1	-17.4765	1229.42	-0.0142152	0.988658	1	0	25	60	111	9.10186e-05	0	0.350877	0	0.0134833	factor(aya_status)1	-17.4329	1217.15	-0.0143227	0.988573	1	0	25	60	111	9.10186e-05	0	0.350877	0	0.0134833	,histological subtype,,,	,histological subtype,,,
TP53	Ovarian Cancer	factor(aya_status)1	-1.03658	0.289113	-3.58536	0.000336611	0.0386243	35	113	2159	666	3.37663e-39	0.236486	0.764248	0	5.8024e-36	factor(aya_status)1	-1.02664	0.290038	-3.53969	0.000400591	0.0315482	35	113	2159	666	3.37663e-39	0.236486	0.764248	0	5.8024e-36	aya,histological subtype,,,	aya,histological subtype,,,
TP53	Cancer of Unknown Primary	factor(aya_status)1	-0.562227	0.193353	-2.90778	0.00364005	0.210859	46	92	1137	1159	0.00021582	0.333333	0.495209	0	0.0276226	factor(aya_status)1	-0.561272	0.193824	-2.89579	0.00378209	0.151056	46	92	1137	1159	0.00021582	0.333333	0.495209	0	0.0276226	,histological subtype,,,	,histological subtype,,,
TP53	Endometrial Cancer	factor(aya_status)1	-0.339885	0.34192	-0.99405	0.320199	1	15	48	1285	1498	0.000459133	0.238095	0.461732	0	0.049935	factor(aya_status)1	-0.362863	0.342956	-1.05804	0.290035	1	15	48	1285	1498	0.000459133	0.238095	0.461732	0	0.049935	,histological subtype,,,	,histological subtype,,,
KMT2D	Melanoma	factor(aya_status)1	-0.78196	0.225781	-3.46335	0.000533491	0.0538749	24	191	506	1906	0.00036225	0.111628	0.209784	0	0.0414994	factor(aya_status)1	-0.807211	0.226716	-3.56045	0.000370215	0.0298213	24	191	506	1906	0.00036225	0.111628	0.209784	0	0.0414994	,histological subtype,,,	aya,histological subtype,,,site
TP53	Hepatobiliary Cancer	factor(aya_status)1	-0.601083	0.292947	-2.05185	0.0401841	0.81831	16	96	549	1011	2.30301e-06	0.142857	0.351923	0	0.000565357	factor(aya_status)1	-0.612145	0.295037	-2.07481	0.0380045	0.603413	16	96	549	1011	2.30301e-06	0.142857	0.351923	0	0.000565357	,histological subtype,,,	,histological subtype,,,
TP53	Leukemia	factor(aya_status)1	-2.76547	1.01858	-2.71501	0.0066273	0.304554	1	59	79	295	4.83285e-05	0.0166667	0.21123	0	0.00798536	factor(aya_status)1	-2.84065	1.02441	-2.77297	0.00555475	0.195573	1	59	79	295	4.83285e-05	0.0166667	0.21123	0	0.00798536	,,,,undetermined	,,,,,undetermined
NF1	Melanoma	factor(aya_status)1	-1.32263	0.258477	-5.11701	3.10412e-07	0.000132677	17	211	604	1936	7.36852e-10	0.0745614	0.237795	0	3.51724e-07	factor(aya_status)1	-1.35371	0.25971	-5.21237	1.86444e-07	5.81748e-05	17	211	604	1936	7.36852e-10	0.0745614	0.237795	0	3.51724e-07	aya,histological subtype,,,	aya,histological subtype,,,site
TP53	Pancreatic Cancer	factor(aya_status)1	-1.16325	0.25668	-4.53192	5.84509e-06	0.00153748	27	78	2198	1191	1.6797e-15	0.257143	0.648569	0	1.312e-12	factor(aya_status)1	-1.16555	0.25723	-4.53115	5.86636e-06	0.00108745	27	78	2198	1191	1.6797e-15	0.257143	0.648569	0	1.312e-12	aya,histological subtype,,,	aya,histological subtype,,,site
TP53	Salivary Gland Cancer	factor(aya_status)1	-2.75523	1.04204	-2.64408	0.00819126	0.349253	1	48	121	351	2.65399e-05	0.0204082	0.256356	0	0.0046537	factor(aya_status)1	-2.82531	1.04564	-2.702	0.00689231	0.223167	1	48	121	351	2.65399e-05	0.0204082	0.256356	0	0.0046537	,histological subtype,,,	,histological subtype,,,
TP53	Skin Cancer, Non-Melanoma	factor(aya_status)1	-0.675163	0.629199	-1.07305	0.283248	1	5	26	364	312	3.00582e-05	0.16129	0.538462	0	0.0051652	factor(aya_status)1	-0.514795	0.631186	-0.815599	0.41473	1	5	26	364	312	3.00582e-05	0.16129	0.538462	0	0.0051652	,,,,undetermined	,,,,,undetermined
TP53	Soft Tissue Sarcoma	factor(aya_status)1	-0.252479	0.155441	-1.62428	0.104316	1	73	496	474	1295	1.12523e-12	0.128295	0.267948	0	6.44529e-10	factor(aya_status)1	-0.249954	0.155916	-1.60314	0.108905	0.990989	73	496	474	1295	1.12523e-12	0.128295	0.267948	0	6.44529e-10	,,,,undetermined	,,,,,undetermined
TP53	Thyroid Cancer	factor(aya_status)1	-0.69218	0.460181	-1.50415	0.132543	1	6	193	145	914	2.38402e-06	0.0301508	0.136922	0	0.000568986	factor(aya_status)1	-0.68141	0.467491	-1.45759	0.144954	1	6	193	145	914	2.38402e-06	0.0301508	0.136922	0	0.000568986	,histological subtype,,,	,histological subtype,,,
VHL	Renal Cell Carcinoma	factor(aya_status)1	-0.159805	0.296205	-0.539506	0.589538	1	36	96	700	679	2.282e-07	0.272727	0.507614	0	6.53563e-05	factor(aya_status)1	-0.137011	0.29849	-0.459012	0.646226	1	36	96	700	679	2.282e-07	0.272727	0.507614	0	6.53563e-05	,,,,undetermined	,,,,,undetermined
GRIN2A	Melanoma	factor(aya_status)1	-0.957445	0.269526	-3.55233	0.00038183	0.0419732	17	141	395	1337	0.000259926	0.107595	0.22806	0	0.0319041	factor(aya_status)1	-0.946922	0.27019	-3.50465	0.000457212	0.0347169	17	141	395	1337	0.000259926	0.107595	0.22806	0	0.0319041	aya,histological subtype,,sex,	aya,histological subtype,,sex,
NOTCH3	Melanoma	factor(aya_status)1	-1.09556	0.333721	-3.28285	0.00102762	0.0870657	10	186	315	1908	0.000115104	0.0510204	0.1417	0	0.0162127	factor(aya_status)1	-1.1559	0.338277	-3.41703	0.00063309	0.0439516	10	186	315	1908	0.000115104	0.0510204	0.1417	0	0.0162127	,histological subtype,,sex,	aya,histological subtype,,sex,
CTNNB1	Endometrial Cancer	factor(aya_status)1	1.73116	0.281327	6.15353	7.57753e-10	6.25061e-07	37	26	454	2336	6.92977e-14	0.587302	0.162724	1	4.2529e-11	factor(aya_status)1	1.76937	0.285521	6.19698	5.7557e-10	3.61761e-07	37	26	454	2336	6.92977e-14	0.587302	0.162724	1	4.2529e-11	aya,histological subtype,metastasis,,	aya,histological subtype,metastasis,,
IDH1	Glioma	factor(aya_status)1	1.86362	0.0981981	18.9782	2.58252e-80	2.66286e-75	588	469	667	2890	6.30256e-114	0.556291	0.187518	1	5.41516e-110	factor(aya_status)1	1.89631	0.0992595	19.1046	2.31273e-81	3.03805e-76	588	469	667	2890	6.30256e-114	0.556291	0.187518	1	5.41516e-110	aya,histological subtype,metastasis,,	aya,histological subtype,metastasis,,
KRAS	Non-Small Cell Lung Cancer	factor(aya_status)1	-2.01671	0.344705	-5.85054	4.89978e-09	3.28066e-06	9	167	3329	8116	2.31392e-15	0.0511364	0.290869	0	1.65676e-12	factor(aya_status)1	-1.99877	0.344848	-5.79607	6.7885e-09	3.23098e-06	9	167	3329	8116	2.31392e-15	0.0511364	0.290869	0	1.65676e-12	aya,histological subtype,metastasis,sex,	aya,histological subtype,metastasis,sex,site

## Sheet: Primary samples_results
		original results															Results on primary tumor only
		Logistic model results						Fisher's test results									Logistic model results						Fisher's test results
Gene	Cancer	Factors	Estimate	Std..Error	z.value	P value	FDR	aya_mut	aya_wt	adult_mut	adult_wt	P value	murate_aya	murate_adult	Higher_AYA	FDR	Factors	Estimate	Std..Error	z.value	P value	FDR	aya_mut	aya_wt	adult_mut	adult_wt	P value	murate_aya	murate_adult	Higher_AYA	FDR	Significant Variables_original	Significant Variables_primary
IDH1	Glioma	factor(aya_status)1	1.86362	0.0981981	18.9782	2.58e-80	2.66e-75	588	469	667	2890	6.3e-114	0.556291	0.187518	1	5.42e-110	factor(aya_status)1	1.95205	0.123999	15.7424	7.74e-56	4.38e-51	412	282	462	2157	1.05e-98	0.59366	0.176403	1	5.85e-95	aya,histological subtype,metastasis,,	aya,histological subtype,,
ATRX	Glioma	factor(aya_status)1	1.62913	0.0925986	17.5935	2.76e-69	7.13e-65	427	608	440	3066	8.88e-84	0.41256	0.125499	1	3.82e-80	factor(aya_status)1	1.68598	0.115403	14.6095	2.44e-48	4.6e-44	298	374	311	2257	6.28e-70	0.443452	0.121106	1	1.76e-66	aya,histological subtype,metastasis,,	aya,histological subtype,,
TP53	Glioma	factor(aya_status)1	1.32639	0.089576	14.8075	1.31e-49	1.5e-45	563	479	1127	2384	8.2e-37	0.540307	0.320991	1	1.17e-33	factor(aya_status)1	1.3287	0.110799	11.992	3.91e-33	3.16e-29	380	299	830	1743	4.56e-29	0.559647	0.322581	1	6.38e-26	aya,histological subtype,,,	aya,histological subtype,,
PIK3CA	Breast Cancer	factor(aya_status)1	-0.748732	0.0861506	-8.69096	3.59e-18	8.82e-15	186	729	2857	4919	2.03e-24	0.203279	0.367413	0	2.18e-21	factor(aya_status)1	-0.736097	0.113943	-6.46022	1.05e-10	1.21e-07	108	431	1410	2437	4.26e-15	0.200371	0.366519	0	2.98e-12	aya,,,,	aya,,,
PTEN	Glioma	factor(aya_status)1	-1.12083	0.141044	-7.94665	1.92e-15	3.29e-12	64	978	1073	2438	6.73e-70	0.0614203	0.305611	0	1.93e-66	factor(aya_status)1	-1.12391	0.169154	-6.64429	3.05e-11	3.83e-08	45	634	827	1746	3e-49	0.0662739	0.321415	0	5.59e-46	aya,histological subtype,,,	aya,histological subtype,,
H3F3A	Glioma	factor(aya_status)1	1.42134	0.196023	7.25088	4.14e-13	5.85e-10	67	937	27	3360	8.32e-24	0.0667331	0.00797166	1	7.95e-21	factor(aya_status)1	1.78721	0.24117	7.41058	1.26e-13	2.24e-10	50	591	14	2437	3.51e-23	0.0780031	0.00571195	1	3.92e-20	aya,histological subtype,,,	aya,histological subtype,,
EGFR	Glioma	factor(aya_status)1	-0.985283	0.154305	-6.38528	1.71e-10	1.58e-07	52	1005	628	2929	1.95e-29	0.0491958	0.176553	0	2.39e-26	factor(aya_status)1	-1.06994	0.199445	-5.36456	8.11e-08	5.1e-05	31	663	450	2169	1.05e-20	0.0446686	0.171821	0	8.42e-18	aya,histological subtype,,,	aya,histological subtype,,
CDH1	Breast Cancer	factor(aya_status)1	-1.84684	0.296352	-6.23192	4.61e-10	3.86e-07	14	900	1165	6591	5.71e-42	0.0153173	0.150206	0	1.23e-38	factor(aya_status)1	-1.67439	0.404439	-4.14005	3.47e-05	0.00797925	9	529	550	3283	9.94e-23	0.0167286	0.143491	0	9.26e-20	aya,histological subtype,,,	aya,histological subtype,,
CTNNB1	Endometrial Cancer	factor(aya_status)1	1.73116	0.281327	6.15353	7.58e-10	6.25e-07	37	26	454	2336	6.93e-14	0.587302	0.162724	1	4.25e-11	factor(aya_status)1	1.84047	0.333027	5.5265	3.27e-08	2.31e-05	28	15	320	1737	7.29e-13	0.651163	0.155566	1	4.08e-10	aya,histological subtype,metastasis,,	aya,histological subtype,,
KRAS	Non-Small Cell Lung Cancer	factor(aya_status)1	-2.01671	0.344705	-5.85054	4.9e-09	3.28e-06	9	167	3329	8116	2.31e-15	0.0511364	0.290869	0	1.66e-12	factor(aya_status)1	-2.00644	0.465157	-4.31346	1.61e-05	0.00441029	5	82	2187	4786	1.32e-08	0.0574713	0.313638	0	4.92e-06	aya,histological subtype,metastasis,sex,	aya,,sex,
KRAS	Pancreatic Cancer	factor(aya_status)1	-1.61323	0.281809	-5.72455	1.04e-08	6.4e-06	36	71	2711	704	1.78e-23	0.336449	0.793851	0	1.53e-20	factor(aya_status)1	-1.49037	0.39403	-3.78239	0.00015533	0.0257502	19	32	1548	391	9.35e-11	0.372549	0.79835	0	4.36e-08	aya,histological subtype,,,	aya,histological subtype,,
MAP3K1	Breast Cancer	factor(aya_status)1	-1.25972	0.22052	-5.71249	1.11e-08	6.79e-06	22	892	615	7139	1.11e-11	0.02407	0.0793139	0	5.61e-09	factor(aya_status)1	-1.23985	0.288295	-4.30063	1.7e-05	0.00458461	13	525	291	3542	1.2e-06	0.0241636	0.0759197	0	0.00037156	aya,,,,	aya,,,
TP53	Breast Cancer	factor(aya_status)1	0.376121	0.071481	5.26183	1.43e-07	6.84e-05	481	433	3134	4623	2.35e-12	0.526258	0.404022	1	1.26e-09	factor(aya_status)1	0.452603	0.094711	4.77878	1.76e-06	0.00069231	288	250	1469	2364	2.85e-11	0.535316	0.383251	1	1.45e-08	aya,histological subtype,,sex,	aya,,sex,
NF1	Melanoma	factor(aya_status)1	-1.32263	0.258477	-5.11701	3.1e-07	0.00013268	17	211	604	1936	7.37e-10	0.0745614	0.237795	0	3.52e-07	factor(aya_status)1	-0.764087	0.390377	-1.9573	0.0503119	1	8	63	174	613	0.0333632	0.112676	0.221093	0	0.947211	aya,histological subtype,,,	NA
NF1	Colorectal Cancer	factor(aya_status)1	0.680444	0.144162	4.72	2.36e-06	0.00072839	64	643	314	6275	6.37e-06	0.0905233	0.0476552	1	0.00133587	factor(aya_status)1	0.97118	0.156144	6.21977	4.98e-10	4.61e-07	59	429	218	4143	1.17e-08	0.120902	0.0499885	1	4.69e-06	aya,,,,	aya,,,
KIT	Gastrointestinal Stromal Tumor	factor(aya_status)1	-1.25509	0.266937	-4.70182	2.58e-06	0.00078428	32	32	601	164	1.83e-06	0.5	0.785621	0	0.00046322	factor(aya_status)1	-1.15599	0.329768	-3.50548	0.00045579	0.0579001	20	21	370	117	0.00034206	0.487805	0.759754	0	0.047829	aya,,,,	,,,undetermined
TP53	Pancreatic Cancer	factor(aya_status)1	-1.16325	0.25668	-4.53192	5.85e-06	0.00153748	27	78	2198	1191	1.68e-15	0.257143	0.648569	0	1.31e-12	factor(aya_status)1	-0.894745	0.368238	-2.4298	0.0151071	0.570086	14	35	1209	707	1.63e-06	0.285714	0.631002	0	0.00047873	aya,histological subtype,,,	,histological subtype,,
KMT2C	Breast Cancer	factor(aya_status)1	-0.927904	0.218477	-4.24714	2.17e-05	0.00456541	23	630	510	5123	1.6e-07	0.035222	0.0905379	0	4.92e-05	factor(aya_status)1	-0.988498	0.30448	-3.24651	0.0011683	0.115258	12	370	225	2556	0.00025061	0.0314136	0.0809061	0	0.0359404	aya,,,,	,,,undetermined
PBRM1	Renal Cell Carcinoma	factor(aya_status)1	-2.00785	0.474167	-4.23448	2.29e-05	0.00478146	5	124	403	884	5.87e-14	0.0387597	0.313131	0	3.88e-11	factor(aya_status)1	-1.96066	0.533575	-3.67458	0.00023824	0.0356289	4	89	238	571	5.02e-09	0.0430108	0.29419	0	2.16e-06	aya,histological subtype,,,	aya,,,
AKT3	Colorectal Cancer	factor(aya_status)1	1.02151	0.248076	4.11775	3.83e-05	0.00725184	22	666	73	6132	0.00016555	0.0319767	0.0117647	1	0.0222245	factor(aya_status)1	1.16024	0.28072	4.13308	3.58e-05	0.00802916	18	453	50	4002	0.00013415	0.0382166	0.0123396	1	0.0252796	aya,,,,	aya,,,
FH	Renal Cell Carcinoma	factor(aya_status)1	1.98702	0.483535	4.10935	3.97e-05	0.0074656	10	121	18	1349	6.25e-05	0.0763359	0.0131675	1	0.00994638	factor(aya_status)1	1.92155	0.584731	3.2862	0.00101548	0.104076	7	88	10	864	0.00060039	0.0736842	0.0114416	1	0.0780931	aya,,,,	NA
ROS1	Melanoma	factor(aya_status)1	-0.932981	0.22882	-4.07736	4.55e-05	0.00822548	23	199	544	1916	1.52e-05	0.103604	0.221138	0	0.00290241	factor(aya_status)1	-0.678331	0.398007	-1.70432	0.0883212	1	8	60	150	603	0.110161	0.117647	0.199203	0	1	aya,,,,	NA
SMO	Embryonal Tumor	factor(aya_status)1	2.69268	0.678314	3.96967	7.2e-05	0.0119696	13	44	1	32	0.0145281	0.22807	0.030303	1	0.523434	NA	NA	NA	NA	NA	NA	NA	NA	NA	NA	NA	NA	NA	NA	NA	aya,,,,	NA
FBXW7	Embryonal Tumor	factor(aya_status)1	2.86968	0.726292	3.95114	7.78e-05	0.0128116	12	45	0	33	0.00316322	0.210526	0	1	0.198383	NA	NA	NA	NA	NA	NA	NA	NA	NA	NA	NA	NA	NA	NA	NA	aya,,,,	NA
PIK3CA	Cervical Cancer	factor(aya_status)1	-1.31607	0.333273	-3.94893	7.85e-05	0.0129094	12	93	107	228	1.62e-05	0.114286	0.319403	0	0.00295938	factor(aya_status)1	-1.41386	0.406513	-3.47802	0.00050514	0.0622109	8	71	64	144	0.000217	0.101266	0.307692	0	0.0319395	aya,,,,	,,,undetermined
KDM5A	Glioma	factor(aya_status)1	1.00313	0.255327	3.92882	8.54e-05	0.0139049	27	813	51	2791	0.0194247	0.0321429	0.0179451	1	0.598875	factor(aya_status)1	0.943505	0.345349	2.73203	0.00629451	0.343458	15	512	36	1995	0.117618	0.028463	0.0177253	1	1	aya,,,,	NA
ARID2	Melanoma	factor(aya_status)1	-1.30001	0.331344	-3.92345	8.73e-05	0.0140636	10	205	346	2022	1.07e-05	0.0465116	0.146115	0	0.00218721	factor(aya_status)1	-1.06349	0.609781	-1.74406	0.0811492	1	3	63	88	622	0.0695755	0.0454546	0.123944	0	1	aya,,,,	NA
MSH2	Colorectal Cancer	factor(aya_status)1	0.707355	0.182407	3.87789	0.00010536	0.0161438	39	649	177	6028	0.00019605	0.0566861	0.0285254	1	0.0255219	factor(aya_status)1	0.841854	0.202232	4.16281	3.14e-05	0.00749733	33	438	128	3924	0.00010464	0.0700637	0.0315893	1	0.020902	aya,,,,	aya,,,
CBFB	Breast Cancer	factor(aya_status)1	-1.25657	0.325191	-3.86409	0.0001115	0.01676	10	796	292	6486	3.47e-06	0.0124069	0.0430806	0	0.00078426	factor(aya_status)1	-0.881742	0.330986	-2.66399	0.00772201	0.391495	10	444	173	3052	0.00250108	0.0220264	0.0536434	0	0.22932	aya,,metastasis,,	NA
NRAS	Melanoma	factor(aya_status)1	-0.765649	0.198866	-3.85007	0.00011808	0.0173786	32	199	631	1938	0.00013839	0.138528	0.245621	0	0.0191779	factor(aya_status)1	-0.3227	0.327002	-0.986844	0.323719	1	13	60	186	620	0.380704	0.178082	0.230769	0	1	aya,,,,	NA
PTPRT	Melanoma	factor(aya_status)1	-1.07186	0.279065	-3.8409	0.00012259	0.0178783	16	122	382	1115	0.00016398	0.115942	0.255177	0	0.0222245	factor(aya_status)1	-0.0622183	0.472706	-0.131622	0.895283	1	7	30	77	322	1	0.189189	0.192982	0	1	aya,histological subtype,,,	NA
FLT1	Melanoma	factor(aya_status)1	-1.41219	0.367758	-3.83999	0.00012304	0.0178941	8	207	327	2085	5.22e-06	0.0372093	0.135572	0	0.00112198	factor(aya_status)1	-0.637008	0.542586	-1.17402	0.240386	1	4	62	85	642	0.220642	0.0606061	0.116919	0	1	aya,,,,	NA
EP300	Hepatobiliary Cancer	factor(aya_status)1	1.74821	0.45988	3.80144	0.00014386	0.0204598	7	104	29	1515	0.00829376	0.0630631	0.0187824	1	0.391538	factor(aya_status)1	1.33558	0.654805	2.03966	0.0413839	0.973934	3	60	21	1043	0.146134	0.0476191	0.0197368	1	1	aya,,,,	NA
FOXA1	Breast Cancer	factor(aya_status)1	-1.46586	0.386099	-3.79659	0.0001467	0.0207782	7	755	283	5971	6.51e-08	0.00918635	0.045251	0	2.33e-05	factor(aya_status)1	-1.35273	0.513272	-2.63551	0.00840115	0.410231	4	432	116	2913	0.00065947	0.00917431	0.0382965	0	0.081965	aya,,,,	NA
SOCS1	Mature B-Cell Neoplasms	factor(aya_status)1	1.17139	0.310088	3.77761	0.00015834	0.0218854	20	52	55	800	1.44e-07	0.277778	0.0643275	1	4.57e-05	factor(aya_status)1	1.11018	0.359419	3.08883	0.00200948	0.167296	15	38	40	521	1.4e-05	0.283019	0.0713012	1	0.00340865	aya,histological subtype,,,	,,,undetermined
BRAF	Thyroid Cancer	factor(aya_status)1	-0.688401	0.183002	-3.76172	0.00016875	0.0228647	75	124	476	583	0.0618084	0.376884	0.449481	0	0.920377	factor(aya_status)1	-0.583038	0.223263	-2.61145	0.00901602	0.424722	52	80	250	321	0.380983	0.393939	0.437828	0	1	aya,histological subtype,,,	NA
MEN1	Pancreatic Cancer	factor(aya_status)1	-1.58071	0.427992	-3.69331	0.00022135	0.0283525	7	96	185	3184	0.511115	0.0679612	0.0549124	1	1	factor(aya_status)1	-1.60603	0.650135	-2.4703	0.0135	0.531547	3	45	94	1808	0.730437	0.0625	0.0494217	1	1	aya,histological subtype,,,	NA
SDHA	Glioma	factor(aya_status)1	1.01193	0.275507	3.67298	0.00023973	0.0300809	25	782	39	2920	0.00111073	0.0309789	0.0131801	1	0.0955172	factor(aya_status)1	0.603657	0.365047	1.65364	0.0982003	1	12	659	31	2523	0.256692	0.0178838	0.0121378	1	1	aya,,,,	NA
STK11	Non-Small Cell Lung Cancer	factor(aya_status)1	-1.85931	0.508071	-3.65955	0.00025266	0.0313123	4	164	1511	9431	6.66e-07	0.0238095	0.138092	0	0.00017891	factor(aya_status)1	-1.78663	0.719266	-2.48397	0.0129928	0.522037	2	80	909	5669	0.00097976	0.0243902	0.138188	0	0.107447	aya,,,sex,	NA
PTCH1	Embryonal Tumor	factor(aya_status)1	1.46852	0.405431	3.62213	0.00029219	0.0349606	18	39	5	28	0.131504	0.315789	0.151515	1	1	NA	NA	NA	NA	NA	NA	NA	NA	NA	NA	NA	NA	NA	NA	NA	aya,,,,	NA
GATA3	Breast Cancer	factor(aya_status)1	0.336949	0.0932629	3.6129	0.00030279	0.0359276	167	747	979	6775	5.12e-06	0.182713	0.126257	1	0.00112198	factor(aya_status)1	0.265349	0.125364	2.11662	0.034292	0.890396	94	444	491	3342	0.00441341	0.174721	0.128098	1	0.344103	aya,,,,	NA
IDH2	Glioma	factor(aya_status)1	0.75878	0.210458	3.60538	0.0003117	0.036689	45	1010	62	3495	1.09e-05	0.042654	0.0174304	1	0.00218721	factor(aya_status)1	0.830036	0.277635	2.98967	0.00279282	0.208278	27	665	38	2581	0.0001469	0.0390173	0.0145094	1	0.0265036	aya,histological subtype,,,	,histological subtype,,
ALK	Melanoma	factor(aya_status)1	-1.32235	0.367075	-3.60241	0.00031529	0.0369426	8	223	299	2269	3.65e-05	0.034632	0.116433	0	0.00614402	factor(aya_status)1	-0.645741	0.538167	-1.19989	0.230182	1	4	69	78	728	0.296727	0.0547945	0.0967742	0	1	aya,histological subtype,,,	NA
TBX3	Breast Cancer	factor(aya_status)1	-1.23328	0.342416	-3.6017	0.00031614	0.0370008	9	664	328	5506	6.36e-08	0.013373	0.0562221	0	2.33e-05	factor(aya_status)1	-0.803468	0.395299	-2.03256	0.0420971	0.983963	7	379	142	2692	0.00282221	0.0181347	0.0501059	0	0.250549	aya,,,,	NA
WT1	Leukemia	factor(aya_status)1	1.42442	0.396748	3.59024	0.00033038	0.0382331	12	44	24	337	0.00107265	0.214286	0.066482	1	0.0955172	factor(aya_status)1	-0.383559	1.09728	-0.349555	0.726673	1	1	22	7	105	1	0.0434783	0.0625	0	1	aya,,,,	NA
TP53	Ovarian Cancer	factor(aya_status)1	-1.03658	0.289113	-3.58536	0.00033661	0.0386243	35	113	2159	666	3.38e-39	0.236486	0.764248	0	5.8e-36	factor(aya_status)1	-0.655778	0.376008	-1.74405	0.0811497	1	22	59	807	333	1.41e-14	0.271605	0.707895	0	8.74e-12	aya,histological subtype,,,	,histological subtype,,
KEAP1	Non-Small Cell Lung Cancer	factor(aya_status)1	-2.53804	0.713417	-3.55758	0.00037429	0.0415425	2	159	1408	8514	1.47e-08	0.0124224	0.141907	0	5.75e-06	factor(aya_status)1	-1.61208	0.720634	-2.23703	0.0252847	0.768038	2	78	756	5137	0.00332515	0.025	0.128288	0	0.27105	aya,,metastasis,sex,	NA
RUNX1	Breast Cancer	factor(aya_status)1	-1.28781	0.362286	-3.55467	0.00037846	0.041778	8	906	265	7456	2.99e-06	0.00875274	0.034322	0	0.0006945	factor(aya_status)1	-1.56774	0.511112	-3.06731	0.00215993	0.175934	4	534	148	3678	2.62e-05	0.00743494	0.0386827	0	0.00609988	aya,,,,	,,,undetermined
GRIN2A	Melanoma	factor(aya_status)1	-0.957445	0.269525	-3.55233	0.00038183	0.0419732	17	141	395	1337	0.00025993	0.107595	0.22806	0	0.0319041	factor(aya_status)1	-0.929253	0.561224	-1.65576	0.0977704	1	4	37	98	374	0.103919	0.097561	0.207627	0	1	aya,histological subtype,,sex,	NA
RB1	CNS Cancer	factor(aya_status)1	2.98852	0.85207	3.50737	0.00045256	0.0479101	7	80	1	350	6.7e-05	0.0804598	0.002849	1	0.0104605	NA	NA	NA	NA	NA	NA	NA	NA	NA	NA	NA	NA	NA	NA	NA	aya,,,,	NA
BRAF	Melanoma	factor(aya_status)1	0.516004	0.147972	3.48716	0.00048818	0.0505894	105	126	833	1736	8.13e-05	0.454545	0.324251	1	0.0122531	factor(aya_status)1	0.628233	0.271032	2.31793	0.020453	0.683327	33	40	226	580	0.0030171	0.452055	0.280397	1	0.253577	,histological subtype,,,	NA
ERBB4	Melanoma	factor(aya_status)1	-0.843187	0.243123	-3.46815	0.00052406	0.0532376	20	211	444	2124	0.00041565	0.0865801	0.172897	0	0.0457854	factor(aya_status)1	-0.716899	0.420826	-1.70355	0.0884644	1	7	66	130	676	0.176863	0.0958904	0.16129	0	1	,histological subtype,,,	NA
KMT2D	Melanoma	factor(aya_status)1	-0.78196	0.225781	-3.46335	0.00053349	0.0538749	24	191	506	1906	0.00036225	0.111628	0.209784	0	0.0414994	factor(aya_status)1	-0.724163	0.419828	-1.72491	0.0845444	1	7	59	136	591	0.130885	0.106061	0.18707	0	1	,histological subtype,,,	NA
CARD11	Melanoma	factor(aya_status)1	-1.20074	0.34899	-3.44062	0.00058038	0.057487	9	206	284	2086	0.0001848	0.0418605	0.119831	0	0.0244282	factor(aya_status)1	-0.936476	0.613646	-1.52608	0.126989	1	3	63	71	639	0.189361	0.0454546	0.1	0	1	,,,,undetermined	NA
NOTCH3	Melanoma	factor(aya_status)1	-1.09556	0.333721	-3.28285	0.00102762	0.0870657	10	186	315	1908	0.0001151	0.0510204	0.1417	0	0.0162127	factor(aya_status)1	-0.667721	0.542999	-1.22969	0.218813	1	4	55	84	554	0.217193	0.0677966	0.131661	0	1	,histological subtype,,sex,	NA
PIK3C2G	Melanoma	factor(aya_status)1	-1.47501	0.465061	-3.17165	0.00151577	0.11509	5	133	216	1366	0.00027141	0.0362319	0.136536	0	0.0328448	factor(aya_status)1	-1.50665	1.03534	-1.45523	0.145606	1	1	40	51	421	0.106335	0.0243902	0.108051	0	1	,,,sex,	NA
PALB2	Colorectal Cancer	factor(aya_status)1	0.629871	0.20187	3.12018	0.00180741	0.130873	31	657	153	6052	0.00373277	0.0450581	0.0246575	1	0.220286	factor(aya_status)1	0.886983	0.215659	4.11289	3.91e-05	0.00859448	29	442	108	3944	0.00015919	0.0615711	0.0266535	1	0.0278227	NA	aya,,,
SETD2	Renal Cell Carcinoma	factor(aya_status)1	-1.46116	0.470845	-3.10328	0.00191392	0.136571	5	127	287	1087	1.01e-07	0.0378788	0.208879	0	3.35e-05	factor(aya_status)1	-1.64862	0.601794	-2.73951	0.00615303	0.340612	3	93	149	729	8.55e-05	0.03125	0.169704	0	0.0183835	,,metastasis,,	,,,undetermined
EGFR	Melanoma	factor(aya_status)1	-3.02575	1.00554	-3.00907	0.00262045	0.168662	1	230	211	2357	1.85e-07	0.004329	0.0821651	0	5.47e-05	factor(aya_status)1	-17.0286	1232.41	-0.0138173	0.988976	1	0	73	61	745	0.00690366	0	0.0756824	0	0.443818	,,,,undetermined	NA
PTPN11	Glioma	factor(aya_status)1	-0.711672	0.240016	-2.9651	0.00302589	0.186048	21	1021	189	3322	1.25e-06	0.0201535	0.0538308	0	0.00032466	factor(aya_status)1	-0.687365	0.297165	-2.31308	0.0207182	0.689335	14	665	135	2438	0.00018247	0.0206186	0.0524679	0	0.0294545	,,,,undetermined	,,,undetermined
KRAS	Cancer of Unknown Primary	factor(aya_status)1	-0.919075	0.314379	-2.92346	0.00346164	0.20326	12	126	476	1827	0.00027596	0.0869565	0.206687	0	0.0329308	factor(aya_status)1	0.421656	0.723064	0.583152	0.559791	1	3	18	40	225	1	0.142857	0.150943	0	1	,histological subtype,,,	NA
NF1	Glioma	factor(aya_status)1	-0.347685	0.119178	-2.91736	0.00353012	0.206229	100	953	598	2955	1.49e-09	0.0949668	0.168308	0	6.72e-07	factor(aya_status)1	-0.381245	0.152289	-2.50343	0.0122994	0.507944	62	628	426	2189	6.62e-07	0.0898551	0.162906	0	0.00021776	,histological subtype,,,	,,,undetermined
TP53	Cancer of Unknown Primary	factor(aya_status)1	-0.562227	0.193353	-2.90778	0.00364005	0.210859	46	92	1137	1159	0.00021582	0.333333	0.495209	0	0.0276226	factor(aya_status)1	-0.623727	0.508261	-1.22718	0.219755	1	7	14	122	140	0.264412	0.333333	0.465649	0	1	,histological subtype,,,	NA
NF1	Mature B-Cell Neoplasms	factor(aya_status)1	1.60816	0.555728	2.8938	0.00380614	0.216826	6	66	9	850	0.00049848	0.0833333	0.0104773	1	0.0528761	factor(aya_status)1	2.5534	0.688958	3.70618	0.00021041	0.0322335	6	47	5	559	0.00010085	0.113208	0.00886525	1	0.0208915	NA	aya,,,
KIT	Melanoma	factor(aya_status)1	-1.68018	0.58885	-2.85332	0.00432644	0.234545	3	228	186	2383	9.65e-05	0.012987	0.0724017	0	0.0140499	factor(aya_status)1	-1.07336	0.736206	-1.45796	0.144852	1	2	71	73	733	0.0773106	0.0273973	0.0905707	0	1	,histological subtype,,,	NA
ATRX	Soft Tissue Sarcoma	factor(aya_status)1	-0.746222	0.269538	-2.76852	0.00563117	0.275967	17	552	176	1588	1.28e-08	0.029877	0.0997732	0	5.22e-06	factor(aya_status)1	-0.377288	0.357267	-1.05604	0.290949	1	10	335	85	976	0.00074171	0.0289855	0.0801131	0	0.0882632	,,,,undetermined	NA
RBM10	Non-Small Cell Lung Cancer	factor(aya_status)1	-1.59358	0.585823	-2.72025	0.00652333	0.301897	3	137	885	7697	0.0003596	0.0214286	0.103123	0	0.0414994	factor(aya_status)1	-15.3303	478.197	-0.0320586	0.974425	1	0	64	564	4531	0.00093534	0	0.110697	0	0.104627	,,metastasis,,	NA
CDKN2A	Soft Tissue Sarcoma	factor(aya_status)1	-2.79078	1.02713	-2.71705	0.00658664	0.303824	1	568	45	1724	7.39e-05	0.00175747	0.0254381	0	0.0113417	factor(aya_status)1	-17.4198	1427.03	-0.012207	0.99026	1	0	345	29	1034	0.00059856	0	0.0272813	0	0.0780931	,,,,undetermined	NA
TP53	Leukemia	factor(aya_status)1	-2.76547	1.01858	-2.71501	0.0066273	0.304554	1	59	79	295	4.83e-05	0.0166667	0.21123	0	0.00798536	factor(aya_status)1	-17.3883	1269.32	-0.013699	0.98907	1	0	25	25	90	0.00755085	0	0.217391	0	0.462979	,,,,undetermined	NA
TP53	Salivary Gland Cancer	factor(aya_status)1	-2.75523	1.04204	-2.64408	0.00819126	0.349253	1	48	121	351	2.65e-05	0.0204082	0.256356	0	0.0046537	factor(aya_status)1	-17.2103	1162.64	-0.0148028	0.98819	1	0	26	53	142	0.00091585	0	0.271795	0	0.104538	,histological subtype,,,	NA
BRCA1	Breast Cancer	factor(aya_status)1	0.438537	0.179149	2.4479	0.0143693	0.4861	39	876	222	7551	0.0237676	0.0426229	0.0285604	1	0.656628	factor(aya_status)1	0.886705	0.23504	3.77257	0.00016158	0.0263982	26	513	75	3772	0.00016525	0.0482375	0.0194957	1	0.0280073	NA	aya,,,
ERBB2	Melanoma	factor(aya_status)1	-2.45416	1.00735	-2.43625	0.0148405	0.493301	1	230	124	2444	0.00035961	0.004329	0.0482866	0	0.0414994	factor(aya_status)1	-0.998631	1.03164	-0.968003	0.333043	1	1	72	28	778	0.503406	0.0136986	0.0347394	0	1	,,,,undetermined	NA
STAG2	Glioma	factor(aya_status)1	-0.640703	0.264567	-2.4217	0.0154479	0.505505	17	1018	176	3330	3.97e-07	0.0164251	0.0501997	0	0.0001099	factor(aya_status)1	-0.678734	0.346746	-1.95744	0.050296	1	10	662	121	2447	5.9e-05	0.014881	0.0471184	0	0.0131932	,,,,undetermined	,,,undetermined
B2M	Mature B-Cell Neoplasms	factor(aya_status)1	0.886568	0.372677	2.37892	0.0173636	0.539433	12	55	41	806	0.00021861	0.179104	0.0484061	1	0.0276226	factor(aya_status)1	1.39705	0.41337	3.37965	0.00072578	0.0818594	12	41	24	537	1.28e-05	0.226415	0.0427807	1	0.00325389	,histological subtype,,,	,,,undetermined
KEAP1	Cancer of Unknown Primary	factor(aya_status)1	-2.33719	1.0085	-2.31749	0.0204772	0.59085	1	136	183	2044	0.00022794	0.00729927	0.0821733	0	0.028384	factor(aya_status)1	0.512768	1.10601	0.463618	0.642922	1	1	19	9	246	0.536165	0.05	0.0352941	1	1	,,,,undetermined	NA
KRAS	Ovarian Cancer	factor(aya_status)1	-0.548161	0.261613	-2.09532	0.0361429	0.783138	36	112	224	2603	4.16e-09	0.243243	0.0792359	1	1.79e-06	factor(aya_status)1	-0.881882	0.350104	-2.51892	0.0117717	0.499956	21	60	121	1021	0.00019781	0.259259	0.105954	1	0.029948	,histological subtype,,,	,histological subtype,,
TP53	Hepatobiliary Cancer	factor(aya_status)1	-0.601083	0.292947	-2.05185	0.0401841	0.81831	16	96	549	1011	2.3e-06	0.142857	0.351923	0	0.00056536	factor(aya_status)1	-0.694632	0.406068	-1.71063	0.0871494	1	8	56	346	730	0.00070881	0.125	0.321561	0	0.0861825	,histological subtype,,,	NA
CTNNB1	Soft Tissue Sarcoma	factor(aya_status)1	0.627428	0.351368	1.78567	0.0741522	1	29	541	28	1742	1.27e-05	0.0508772	0.0158192	1	0.00247575	factor(aya_status)1	0.935506	0.423294	2.21006	0.0271009	0.796666	26	320	20	1044	2.37e-06	0.0751445	0.018797	1	0.00066188	,histological subtype,,,	,,,undetermined
NF2	Nerve Sheath Tumor	factor(aya_status)1	-1.01918	0.573126	-1.77828	0.0753583	1	6	67	27	76	0.00294611	0.0821918	0.262136	0	0.187976	factor(aya_status)1	-1.74266	0.750287	-2.32266	0.0201974	0.676384	3	49	25	52	0.00019812	0.0576923	0.324675	0	0.029948	NA	,histological subtype,,
TP53	Soft Tissue Sarcoma	factor(aya_status)1	-0.252479	0.155441	-1.62428	0.104316	1	73	496	474	1295	1.13e-12	0.128295	0.267948	0	6.45e-10	factor(aya_status)1	-0.0369114	0.207511	-0.177877	0.85882	1	45	300	281	782	1.06e-07	0.130435	0.264346	0	3.7e-05	,,,,undetermined	,,,undetermined
PIK3R1	Glioma	factor(aya_status)1	-0.24296	0.151591	-1.60273	0.108994	1	61	974	339	3167	0.00010503	0.0589372	0.0966914	0	0.0150406	factor(aya_status)1	-0.367866	0.195731	-1.87945	0.060183	1	36	636	241	2327	0.0006248	0.0535714	0.0938473	0	0.0794204	,histological subtype,,,	NA
RB1	Soft Tissue Sarcoma	factor(aya_status)1	-0.475491	0.300941	-1.58001	0.114104	1	14	555	123	1646	2.23e-05	0.0246046	0.0695308	0	0.00398399	factor(aya_status)1	-0.233198	0.402858	-0.57886	0.562684	1	8	337	61	1002	0.00933064	0.0231884	0.0573848	0	0.532513	,,,,undetermined	NA
RB1	Glioma	factor(aya_status)1	0.248624	0.160927	1.54495	0.122359	1	55	983	297	3210	0.00057446	0.0529865	0.0846878	0	0.0587586	factor(aya_status)1	0.096373	0.20753	0.464381	0.642375	1	32	643	231	2338	0.00018432	0.0474074	0.0899183	0	0.0294545	NA	,histological subtype,,
TP53	Thyroid Cancer	factor(aya_status)1	-0.69218	0.460181	-1.50415	0.132543	1	6	193	145	914	2.38e-06	0.0301508	0.136922	0	0.00056899	factor(aya_status)1	-1.11919	0.788469	-1.41944	0.15577	1	2	130	79	492	6.42e-06	0.0151515	0.138354	0	0.00170971	,histological subtype,,,	,histological subtype,,
CDH1	Esophagogastric Cancer	factor(aya_status)1	0.355644	0.259443	1.3708	0.170437	1	26	110	207	2105	0.00040234	0.191176	0.0895329	1	0.0448947	factor(aya_status)1	0.478603	0.310664	1.54058	0.123419	1	18	78	137	1557	0.00112774	0.1875	0.0808737	1	0.116804	,histological subtype,,sex,	NA
TP53	Skin Cancer, Non-Melanoma	factor(aya_status)1	-0.675163	0.629199	-1.07305	0.283248	1	5	26	364	312	3.01e-05	0.16129	0.538462	0	0.0051652	NA	NA	NA	NA	NA	NA	NA	NA	NA	NA	NA	NA	NA	NA	NA	,,,,undetermined	NA
TP53	Endometrial Cancer	factor(aya_status)1	-0.339886	0.34192	-0.99405	0.320199	1	15	48	1285	1498	0.00045913	0.238095	0.461732	0	0.049935	factor(aya_status)1	-0.453445	0.448309	-1.01146	0.311798	1	7	36	922	1128	0.0001356	0.162791	0.449756	0	0.0252796	,histological subtype,,,	,histological subtype,,
BRAF	Glioma	factor(aya_status)1	0.0950531	0.157558	0.603289	0.546316	1	78	979	118	3439	7.31e-08	0.0737938	0.033174	1	2.51e-05	factor(aya_status)1	0.0395348	0.207413	0.190609	0.848832	1	40	654	85	2534	0.00334391	0.0576369	0.0324551	1	0.27105	,histological subtype,,,	NA
VHL	Renal Cell Carcinoma	factor(aya_status)1	-0.159805	0.296205	-0.539506	0.589538	1	36	96	700	679	2.28e-07	0.272727	0.507614	0	6.54e-05	factor(aya_status)1	-0.0620276	0.347003	-0.178753	0.858132	1	29	67	427	453	0.00076864	0.302083	0.485227	0	0.0895631	,,,,undetermined	NA
SMARCA4	Ovarian Cancer	factor(aya_status)1	0.21313	0.471834	0.451706	0.651481	1	12	136	66	2751	0.00038189	0.0810811	0.0234292	1	0.0431737	factor(aya_status)1	0.967686	0.495477	1.95304	0.050815	1	7	74	33	1100	0.0139909	0.0864198	0.0291262	1	0.630203	,histological subtype,,,	NA
GRIN2A	Breast Cancer	factor(aya_status)1	-15.5885	411.268	-0.0379035	0.969765	1	0	673	107	5646	1.6e-05	0	0.018599	0	0.00295938	factor(aya_status)1	-16.4239	887.888	-0.0184977	0.985242	1	0	386	43	2753	0.0075704	0	0.0153791	0	0.462979	,,,,undetermined	NA
PIK3CA	Thyroid Cancer	factor(aya_status)1	-16.3912	741.052	-0.0221189	0.982353	1	0	199	58	1000	5.89e-05	0	0.0548204	0	0.00954606	factor(aya_status)1	-17.1967	1495.67	-0.0114977	0.990826	1	0	132	28	543	0.0049452	0	0.0490368	0	0.363927	,histological subtype,,,	NA
TET2	Mature T and NK Neoplasms	factor(aya_status)1	-17.4765	1229.42	-0.0142152	0.988658	1	0	25	60	111	9.1e-05	0	0.350877	0	0.0134833	NA	NA	NA	NA	NA	NA	NA	NA	NA	NA	NA	NA	NA	NA	NA	,histological subtype,,,	NA
