# Supplementary material for: Genomic disparities between cancers in adolescent and young adults and in older adults
Source: Nat Commun. 2022 Nov 24;13:7223. doi: 10.1038/s41467-022-34959-2 (PMC9700745; doi:10.1038/s41467-022-34959-2)
Supplement: Supplementary file 7 — Supplementary Data 4 [file 41467_2022_34959_MOESM7_ESM.xlsx]

## Sheet: description
Model description
Model name	model formula	comments
original_model	mutation status ~ AYA status + histological subtype + sex + metastasis
model_TMB	mutation status ~ AYA status+ histological subtype + sex + metastasis + TMB	samples with reliable TMB estimation
model_site	mutation status ~ AYA status+ histological subtype + sex + metastasis + site	samples used in original model
model_race	mutation status ~ AYA status+ histological subtype + sex + metastasis + race	samples used in original model
model_primary	mutation status ~ AYA status + histological subtype + sex	only used primary samples

## Sheet: original_model
Gene	Cancer Type	Variable	Estimate	Std..Error	z.value	P value	FDR
BRAF	Glioma	factor(aya_status)1	0.095	0.158	0.603	0.546	1
BRAF	Glioma	factor(sample_subtypes)Anaplastic Oligoastrocytoma	-13.466	609.638	-0.022	0.982	1
BRAF	Glioma	factor(sample_subtypes)Anaplastic Oligodendroglioma	-1.086	1.085	-1.001	0.317	1
BRAF	Glioma	factor(sample_subtypes)Anaplastic Pleomorphic Xanthoastrocytoma	5.101	0.632	8.066	7.27e-16	1.31e-12
BRAF	Glioma	factor(sample_subtypes)Astrocytoma	1.522	0.472	3.221	0.00128	0.102
BRAF	Glioma	factor(sample_subtypes)Diffuse Astrocytoma	-0.641	1.086	-0.591	0.555	1
BRAF	Glioma	factor(sample_subtypes)Diffuse Glioma	1.597	0.517	3.087	0.00202	0.142
BRAF	Glioma	factor(sample_subtypes)Diffuse Intrinsic Pontine Glioma	-13.431	518.935	-0.026	0.979	1
BRAF	Glioma	factor(sample_subtypes)Dysembryoplastic Neuroepithelial Tumor	2.077	0.855	2.43	0.0151	0.498
BRAF	Glioma	factor(sample_subtypes)Encapsulated Glioma	2.364	0.68	3.475	0.000512	0.0525
BRAF	Glioma	factor(sample_subtypes)Ependymoma	-13.394	428.511	-0.031	0.975	1
BRAF	Glioma	factor(sample_subtypes)Ganglioglioma	4.043	0.461	8.76	1.95e-18	5.01e-15
BRAF	Glioma	factor(sample_subtypes)Glioblastoma	0.772	0.452	1.708	0.0877	1
BRAF	Glioma	factor(sample_subtypes)Glioblastoma Multiforme	0.923	0.433	2.131	0.0331	0.751
BRAF	Glioma	factor(sample_subtypes)Glioma, NOS	1.865	0.529	3.525	0.000423	0.0455
BRAF	Glioma	factor(sample_subtypes)Gliosarcoma	2.385	0.565	4.222	2.42e-05	0.00501
BRAF	Glioma	factor(sample_subtypes)High-Grade Glioma, NOS	1.411	0.496	2.842	0.00448	0.239
BRAF	Glioma	factor(sample_subtypes)Low-Grade Glioma, NOS	2.774	0.456	6.082	1.18e-09	9.39e-07
BRAF	Glioma	factor(sample_subtypes)Oligoastrocytoma	-13.478	806.276	-0.017	0.987	1
BRAF	Glioma	factor(sample_subtypes)Oligodendroglioma	0.653	0.547	1.194	0.233	1
BRAF	Glioma	factor(sample_subtypes)others	3.256	0.636	5.116	3.12e-07	0.000133
BRAF	Glioma	factor(sample_subtypes)Pilocytic Astrocytoma	1.911	0.476	4.013	6e-05	0.0103
BRAF	Glioma	factor(sample_subtypes)Pilomyxoid Astrocytoma	2.988	0.713	4.189	2.8e-05	0.00565
BRAF	Glioma	factor(sample_subtypes)Pleomorphic Xanthoastrocytoma	5.468	0.651	8.404	4.33e-17	9.31e-14
BRAF	Glioma	factor(sample_all$sex)Male	-0.254	0.126	-2.021	0.0433	0.846
BRAF	Glioma	factor(sample_status)1	0.125	0.248	0.502	0.616	1
BRAF	Breast Cancer	factor(aya_status)1	0.17	0.362	0.47	0.638	1
BRAF	Breast Cancer	factor(sample_subtypes)Breast Invasive Cancer, NOS	13.486	610.19	0.022	0.982	1
BRAF	Breast Cancer	factor(sample_subtypes)Breast Invasive Carcinoma, NOS	12.637	610.19	0.021	0.983	1
BRAF	Breast Cancer	factor(sample_subtypes)Breast Invasive Ductal Carcinoma	12.513	610.19	0.021	0.984	1
BRAF	Breast Cancer	factor(sample_subtypes)Breast Invasive Lobular Carcinoma	12.183	610.19	0.02	0.984	1
BRAF	Breast Cancer	factor(sample_subtypes)Breast Invasive Mixed Mucinous Carcinoma	14.311	610.191	0.023	0.981	1
BRAF	Breast Cancer	factor(sample_subtypes)Breast Mixed Ductal and Lobular Carcinoma	12.012	610.191	0.02	0.984	1
BRAF	Breast Cancer	factor(sample_subtypes)Invasive Breast Carcinoma	13.051	610.19	0.021	0.983	1
BRAF	Breast Cancer	factor(sample_subtypes)Metaplastic Breast Cancer	14.895	610.19	0.024	0.981	1
BRAF	Breast Cancer	factor(sample_subtypes)others	13.962	610.191	0.023	0.982	1
BRAF	Breast Cancer	factor(sample_all$sex)Male	0.299	1.021	0.293	0.769	1
BRAF	Breast Cancer	factor(sample_status)1	0.177	0.262	0.676	0.499	1
BRAF	Colorectal Cancer	factor(aya_status)1	-0.328	0.14	-2.346	0.019	0.567
BRAF	Colorectal Cancer	factor(sample_subtypes)Colorectal Adenocarcinoma	-0.398	0.115	-3.456	0.000549	0.0551
BRAF	Colorectal Cancer	factor(sample_subtypes)Mucinous Adenocarcinoma of the Colon and Rectum	0.845	0.171	4.951	7.38e-07	0.000282
BRAF	Colorectal Cancer	factor(sample_subtypes)others	1.89	0.49	3.855	0.000116	0.0172
BRAF	Colorectal Cancer	factor(sample_subtypes)Rectal Adenocarcinoma	-1.073	0.133	-8.073	6.83e-16	1.26e-12
BRAF	Colorectal Cancer	factor(sample_subtypes)Signet Ring Cell Adenocarcinoma of the Colon and Rectum	-0.924	0.729	-1.266	0.205	1
BRAF	Colorectal Cancer	factor(sample_all$sex)Male	-0.272	0.074	-3.663	0.00025	0.0311
BRAF	Colorectal Cancer	factor(sample_status)1	-0.446	0.086	-5.204	1.95e-07	8.83e-05
BRAF	Soft Tissue Sarcoma	factor(aya_status)1	-2.026	1.031	-1.966	0.0494	0.898
BRAF	Soft Tissue Sarcoma	factor(sample_subtypes)Alveolar Soft Part Sarcoma	0.425	6778.51	0	1	1
BRAF	Soft Tissue Sarcoma	factor(sample_subtypes)Angiosarcoma	18.028	4234.82	0.004	0.997	1
BRAF	Soft Tissue Sarcoma	factor(sample_subtypes)Clear Cell Sarcoma	0.339	6870.56	0	1	1
BRAF	Soft Tissue Sarcoma	factor(sample_subtypes)Dedifferentiated Liposarcoma	-0.444	4623.34	0	1	1
BRAF	Soft Tissue Sarcoma	factor(sample_subtypes)Desmoid/Aggressive Fibromatosis	-0.029	5442.8	0	1	1
BRAF	Soft Tissue Sarcoma	factor(sample_subtypes)Desmoplastic Small-Round-Cell Tumor	17.313	4234.82	0.004	0.997	1
BRAF	Soft Tissue Sarcoma	factor(sample_subtypes)Embryonal Rhabdomyosarcoma	-0.353	5488.43	0	1	1
BRAF	Soft Tissue Sarcoma	factor(sample_subtypes)Epithelioid Hemangioendothelioma	-0.143	6096.36	0	1	1
BRAF	Soft Tissue Sarcoma	factor(sample_subtypes)Epithelioid Sarcoma	0.09	6117.34	0	1	1
BRAF	Soft Tissue Sarcoma	factor(sample_subtypes)Fibrosarcoma	-0.227	8520.54	0	1	1
BRAF	Soft Tissue Sarcoma	factor(sample_subtypes)Follicular Dendritic Cell Sarcoma	-0.555	8641.91	0	1	1
BRAF	Soft Tissue Sarcoma	factor(sample_subtypes)Hemangioma	17.373	4234.82	0.004	0.997	1
BRAF	Soft Tissue Sarcoma	factor(sample_subtypes)Inflammatory Myofibroblastic Tumor	18.425	4234.82	0.004	0.997	1
BRAF	Soft Tissue Sarcoma	factor(sample_subtypes)Intimal Sarcoma	-0.055	7393.8	0	1	1
BRAF	Soft Tissue Sarcoma	factor(sample_subtypes)Leiomyosarcoma	16.943	4234.82	0.004	0.997	1
BRAF	Soft Tissue Sarcoma	factor(sample_subtypes)Liposarcoma	-0.131	7039.55	0	1	1
BRAF	Soft Tissue Sarcoma	factor(sample_subtypes)Myxofibrosarcoma	16.849	4234.82	0.004	0.997	1
BRAF	Soft Tissue Sarcoma	factor(sample_subtypes)Myxoid/Round-Cell Liposarcoma	-0.066	5379.59	0	1	1
BRAF	Soft Tissue Sarcoma	factor(sample_subtypes)others	17.424	4234.82	0.004	0.997	1
BRAF	Soft Tissue Sarcoma	factor(sample_subtypes)Perivascular Epithelioid Cell Tumor	-0.142	6208.76	0	1	1
BRAF	Soft Tissue Sarcoma	factor(sample_subtypes)Pleomorphic Liposarcoma	-0.224	6292.97	0	1	1
BRAF	Soft Tissue Sarcoma	factor(sample_subtypes)Radiation-Associated Sarcoma	18.452	4234.82	0.004	0.997	1
BRAF	Soft Tissue Sarcoma	factor(sample_subtypes)Rhabdomyosarcoma	-0.147	5524.45	0	1	1
BRAF	Soft Tissue Sarcoma	factor(sample_subtypes)Round Cell Sarcoma, NOS	18.441	4234.82	0.004	0.997	1
BRAF	Soft Tissue Sarcoma	factor(sample_subtypes)Sarcoma, NOS	17.274	4234.82	0.004	0.997	1
BRAF	Soft Tissue Sarcoma	factor(sample_subtypes)Soft Tissue Myoepithelial Carcinoma	0.211	8206.88	0	1	1
BRAF	Soft Tissue Sarcoma	factor(sample_subtypes)Solitary Fibrous Tumor/Hemangiopericytoma	16.668	4234.82	0.004	0.997	1
BRAF	Soft Tissue Sarcoma	factor(sample_subtypes)Synovial Sarcoma	0.199	4855.06	0	1	1
BRAF	Soft Tissue Sarcoma	factor(sample_subtypes)Undifferentiated Pleomorphic Sarcoma/Malignant Fibrous Histiocytoma/High-Grade Spindle Cell Sarcoma	17.514	4234.82	0.004	0.997	1
BRAF	Soft Tissue Sarcoma	factor(sample_subtypes)Well-Differentiated Liposarcoma	-0.413	5300.99	0	1	1
BRAF	Soft Tissue Sarcoma	factor(sample_all$sex)Male	0.397	0.368	1.078	0.281	1
BRAF	Soft Tissue Sarcoma	factor(sample_status)1	-0.223	0.426	-0.524	0.6	1
BRAF	Germ Cell Tumor	factor(aya_status)1	-0.947	0.714	-1.326	0.185	1
BRAF	Germ Cell Tumor	factor(sample_subtypes)Embryonal Carcinoma	0.231	4248.34	0	1	1
BRAF	Germ Cell Tumor	factor(sample_subtypes)Germ Cell Tumor with Somatic-Type Malignancy	17.356	3407.85	0.005	0.996	1
BRAF	Germ Cell Tumor	factor(sample_subtypes)Immature Teratoma	0.984	4861.88	0	1	1
BRAF	Germ Cell Tumor	factor(sample_subtypes)Mature Teratoma	0.587	4689.9	0	1	1
BRAF	Germ Cell Tumor	factor(sample_subtypes)Mixed Germ Cell Tumor	16.218	3407.85	0.005	0.996	1
BRAF	Germ Cell Tumor	factor(sample_subtypes)Non-Seminomatous Germ Cell Tumor	0.086	4190.51	0	1	1
BRAF	Germ Cell Tumor	factor(sample_subtypes)others	17.416	3407.85	0.005	0.996	1
BRAF	Germ Cell Tumor	factor(sample_subtypes)Seminoma	16.661	3407.85	0.005	0.996	1
BRAF	Germ Cell Tumor	factor(sample_subtypes)Teratoma	0.032	5302.78	0	1	1
BRAF	Germ Cell Tumor	factor(sample_subtypes)Yolk Sac Tumor	16.984	3407.85	0.005	0.996	1
BRAF	Germ Cell Tumor	factor(sample_all$sex)Male	0.66	1.162	0.568	0.57	1
BRAF	Germ Cell Tumor	factor(sample_status)1	0.916	0.678	1.351	0.177	1
BRAF	Melanoma	factor(aya_status)1	0.516	0.148	3.487	0.000488	0.0506
BRAF	Melanoma	factor(sample_subtypes)Anorectal Mucosal Melanoma	-0.982	0.532	-1.847	0.0647	1
BRAF	Melanoma	factor(sample_subtypes)Cutaneous Melanoma	1.608	0.275	5.855	4.76e-09	3.21e-06
BRAF	Melanoma	factor(sample_subtypes)Desmoplastic Melanoma	-0.83	1.064	-0.78	0.435	1
BRAF	Melanoma	factor(sample_subtypes)Head and Neck Mucosal Melanoma	0.188	0.424	0.444	0.657	1
BRAF	Melanoma	factor(sample_subtypes)Melanoma	1.417	0.277	5.115	3.14e-07	0.000133
BRAF	Melanoma	factor(sample_subtypes)Melanoma of Unknown Primary	1.694	0.301	5.637	1.73e-08	1.03e-05
BRAF	Melanoma	factor(sample_subtypes)Mucosal Melanoma of the Vulva/Vagina	-0.243	0.483	-0.503	0.615	1
BRAF	Melanoma	factor(sample_subtypes)Ocular Melanoma	-1.061	1.059	-1.002	0.316	1
BRAF	Melanoma	factor(sample_subtypes)others	-0.198	0.592	-0.335	0.738	1
BRAF	Melanoma	factor(sample_subtypes)Uveal Melanoma	-3.225	1.038	-3.107	0.00189	0.135
BRAF	Melanoma	factor(sample_all$sex)Male	-0.037	0.088	-0.424	0.672	1
BRAF	Melanoma	factor(sample_status)1	0.162	0.092	1.765	0.0776	1
BRAF	Thyroid Cancer	factor(aya_status)1	-0.688	0.183	-3.762	0.000169	0.0229
BRAF	Thyroid Cancer	factor(sample_subtypes)Follicular Thyroid Cancer	-3.305	1.029	-3.212	0.00132	0.105
BRAF	Thyroid Cancer	factor(sample_subtypes)Hurthle Cell Thyroid Cancer	-18.199	787.469	-0.023	0.982	1
BRAF	Thyroid Cancer	factor(sample_subtypes)Medullary Thyroid Cancer	-18.107	606.778	-0.03	0.976	1
BRAF	Thyroid Cancer	factor(sample_subtypes)others	-0.988	0.68	-1.452	0.146	1
BRAF	Thyroid Cancer	factor(sample_subtypes)Papillary Thyroid Cancer	1.13	0.202	5.605	2.08e-08	1.22e-05
BRAF	Thyroid Cancer	factor(sample_subtypes)Poorly Differentiated Thyroid Cancer	-1.058	0.27	-3.924	8.7e-05	0.014
BRAF	Thyroid Cancer	factor(sample_all$sex)Male	0.138	0.138	1	0.317	1
BRAF	Thyroid Cancer	factor(sample_status)1	0.34	0.141	2.417	0.0156	0.51
BRAF	Non-Small Cell Lung Cancer	factor(aya_status)1	-2.296	1.005	-2.286	0.0223	0.617
BRAF	Non-Small Cell Lung Cancer	factor(sample_subtypes)Large Cell Lung Carcinoma	1.545	1.443	1.071	0.284	1
BRAF	Non-Small Cell Lung Cancer	factor(sample_subtypes)Large Cell Neuroendocrine Carcinoma	1.838	1.051	1.748	0.0805	1
BRAF	Non-Small Cell Lung Cancer	factor(sample_subtypes)Lung Adenocarcinoma	1.444	1.008	1.433	0.152	1
BRAF	Non-Small Cell Lung Cancer	factor(sample_subtypes)Lung Adenosquamous Carcinoma	1.614	1.109	1.456	0.145	1
BRAF	Non-Small Cell Lung Cancer	factor(sample_subtypes)Lung Carcinoid	-12.191	197.749	-0.062	0.951	1
BRAF	Non-Small Cell Lung Cancer	factor(sample_subtypes)Lung Neuroendocrine Tumor	0.399	1.427	0.28	0.78	1
BRAF	Non-Small Cell Lung Cancer	factor(sample_subtypes)Lung Squamous Cell Carcinoma	0.521	1.027	0.507	0.612	1
BRAF	Non-Small Cell Lung Cancer	factor(sample_subtypes)Non-Small Cell Lung Cancer	1.544	1.022	1.511	0.131	1
BRAF	Non-Small Cell Lung Cancer	factor(sample_subtypes)others	2.457	1.117	2.2	0.0278	0.691
BRAF	Non-Small Cell Lung Cancer	factor(sample_subtypes)Pleomorphic Carcinoma of the Lung	1.44	1.17	1.231	0.218	1
BRAF	Non-Small Cell Lung Cancer	factor(sample_subtypes)Poorly Differentiated Non-Small Cell Lung Cancer	1.757	1.048	1.677	0.0935	1
BRAF	Non-Small Cell Lung Cancer	factor(sample_subtypes)Sarcomatoid Carcinoma of the Lung	1.537	1.171	1.313	0.189	1
BRAF	Non-Small Cell Lung Cancer	factor(sample_all$sex)Male	0.026	0.085	0.302	0.762	1
BRAF	Non-Small Cell Lung Cancer	factor(sample_status)1	0.019	0.086	0.226	0.821	1
BRAF	Ovarian Cancer	factor(aya_status)1	0.055	0.385	0.142	0.887	1
BRAF	Ovarian Cancer	factor(sample_subtypes)Endometrioid Ovarian Cancer	-0.758	0.596	-1.272	0.203	1
BRAF	Ovarian Cancer	factor(sample_subtypes)High-Grade Serous Fallopian Tube Cancer	-15.801	766.836	-0.021	0.984	1
BRAF	Ovarian Cancer	factor(sample_subtypes)High-Grade Serous Ovarian Cancer	-1.741	0.398	-4.372	1.23e-05	0.00288
BRAF	Ovarian Cancer	factor(sample_subtypes)Low-Grade Serous Ovarian Cancer	0.47	0.421	1.116	0.264	1
BRAF	Ovarian Cancer	factor(sample_subtypes)Mixed Ovarian Carcinoma	-1.062	1.058	-1.004	0.315	1
BRAF	Ovarian Cancer	factor(sample_subtypes)Mucinous Ovarian Cancer	-1.424	1.06	-1.342	0.179	1
BRAF	Ovarian Cancer	factor(sample_subtypes)others	0.742	0.618	1.201	0.23	1
BRAF	Ovarian Cancer	factor(sample_subtypes)Ovarian Cancer, Other	-0.578	1.065	-0.543	0.587	1
BRAF	Ovarian Cancer	factor(sample_subtypes)Ovarian Carcinosarcoma/Malignant Mixed Mesodermal Tumor	-1.866	1.053	-1.773	0.0763	1
BRAF	Ovarian Cancer	factor(sample_subtypes)Ovarian Epithelial Tumor	0.017	0.674	0.025	0.98	1
BRAF	Ovarian Cancer	factor(sample_subtypes)Serous Borderline Ovarian Tumor	2.161	0.48	4.504	6.67e-06	0.00171
BRAF	Ovarian Cancer	factor(sample_subtypes)Serous Ovarian Cancer	-0.352	0.599	-0.586	0.558	1
BRAF	Ovarian Cancer	factor(sample_subtypes)Small Cell Carcinoma of the Ovary	-15.793	1355.99	-0.012	0.991	1
BRAF	Ovarian Cancer	factor(sample_status)1	-0.48	0.27	-1.78	0.0751	1
BRAF	Cancer of Unknown Primary	factor(aya_status)1	-0.068	0.433	-0.156	0.876	1
BRAF	Cancer of Unknown Primary	factor(sample_subtypes)Cancer of Unknown Primary	0.218	0.228	0.958	0.338	1
BRAF	Cancer of Unknown Primary	factor(sample_subtypes)Cancer of Unknown Primary, NOS	0.254	0.333	0.765	0.444	1
BRAF	Cancer of Unknown Primary	factor(sample_subtypes)Neuroendocrine Carcinoma, NOS	-2.26	1.017	-2.221	0.0263	0.675
BRAF	Cancer of Unknown Primary	factor(sample_subtypes)Neuroendocrine Tumor, NOS	-1.914	0.73	-2.622	0.00873	0.363
BRAF	Cancer of Unknown Primary	factor(sample_subtypes)others	0.556	1.069	0.52	0.603	1
BRAF	Cancer of Unknown Primary	factor(sample_subtypes)Poorly Differentiated Carcinoma, NOS	-0.332	0.35	-0.948	0.343	1
BRAF	Cancer of Unknown Primary	factor(sample_subtypes)Small Cell Carcinoma of Unknown Primary	-1.168	1.024	-1.14	0.254	1
BRAF	Cancer of Unknown Primary	factor(sample_subtypes)Squamous Cell Carcinoma, NOS	-0.572	0.421	-1.358	0.175	1
BRAF	Cancer of Unknown Primary	factor(sample_subtypes)Undifferentiated Malignant Neoplasm	-0.141	0.494	-0.286	0.775	1
BRAF	Cancer of Unknown Primary	factor(sample_all$sex)Male	0.114	0.184	0.62	0.535	1
BRAF	Cancer of Unknown Primary	factor(sample_all$sex)Unknown	-10.567	535.412	-0.02	0.984	1
BRAF	Cancer of Unknown Primary	factor(sample_status)1	-0.037	0.213	-0.175	0.861	1
BRAF	Esophagogastric Cancer	factor(aya_status)1	-1.278	1.02	-1.253	0.21	1
BRAF	Esophagogastric Cancer	factor(sample_subtypes)Diffuse Type Stomach Adenocarcinoma	-13.676	744.5	-0.018	0.985	1
BRAF	Esophagogastric Cancer	factor(sample_subtypes)Esophageal Adenocarcinoma	-0.226	0.474	-0.476	0.634	1
BRAF	Esophagogastric Cancer	factor(sample_subtypes)Esophageal Poorly Differentiated Carcinoma	0.824	0.82	1.004	0.315	1
BRAF	Esophagogastric Cancer	factor(sample_subtypes)Esophageal Squamous Cell Carcinoma	0.269	0.64	0.42	0.675	1
BRAF	Esophagogastric Cancer	factor(sample_subtypes)Esophagogastric Adenocarcinoma	-0.12	0.634	-0.19	0.85	1
BRAF	Esophagogastric Cancer	factor(sample_subtypes)Intestinal Type Stomach Adenocarcinoma	0.567	1.089	0.521	0.603	1
BRAF	Esophagogastric Cancer	factor(sample_subtypes)others	0.922	1.099	0.839	0.401	1
BRAF	Esophagogastric Cancer	factor(sample_subtypes)Poorly Differentiated Carcinoma of the Stomach	1.059	0.606	1.748	0.0804	1
BRAF	Esophagogastric Cancer	factor(sample_subtypes)Signet Ring Cell Carcinoma of the Stomach	0.355	0.824	0.431	0.667	1
BRAF	Esophagogastric Cancer	factor(sample_subtypes)Stomach Adenocarcinoma	0.071	0.482	0.148	0.882	1
BRAF	Esophagogastric Cancer	factor(sample_subtypes)Tubular Stomach Adenocarcinoma	-13.762	959.366	-0.014	0.989	1
BRAF	Esophagogastric Cancer	factor(sample_all$sex)Male	-0.127	0.315	-0.403	0.687	1
BRAF	Esophagogastric Cancer	factor(sample_status)1	-0.302	0.358	-0.843	0.399	1
BRAF	Renal Cell Carcinoma	factor(aya_status)1	-16.133	3617.99	-0.004	0.996	1
BRAF	Renal Cell Carcinoma	factor(sample_subtypes)Collecting Duct Renal Cell Carcinoma	-0.034	12805.4	0	1	1
BRAF	Renal Cell Carcinoma	factor(sample_subtypes)FH-Deficient Renal Cell Carcinoma	-0.064	12830.9	0	1	1
BRAF	Renal Cell Carcinoma	factor(sample_subtypes)others	-0.093	10284.4	0	1	1
BRAF	Renal Cell Carcinoma	factor(sample_subtypes)Papillary Renal Cell Carcinoma	18.021	5169.6	0.003	0.997	1
BRAF	Renal Cell Carcinoma	factor(sample_subtypes)Renal Angiomyolipoma	0.275	10726	0	1	1
BRAF	Renal Cell Carcinoma	factor(sample_subtypes)Renal Cell Carcinoma	-0.415	6008.34	0	1	1
BRAF	Renal Cell Carcinoma	factor(sample_subtypes)Renal Clear Cell Carcinoma	17.203	5169.6	0.003	0.997	1
BRAF	Renal Cell Carcinoma	factor(sample_subtypes)Renal Medullary Carcinoma	0.834	12162.6	0	1	1
BRAF	Renal Cell Carcinoma	factor(sample_subtypes)Renal Non-Clear Cell Carcinoma	0.347	11447.1	0	1	1
BRAF	Renal Cell Carcinoma	factor(sample_subtypes)Renal Oncocytoma	0.109	9605.96	0	1	1
BRAF	Renal Cell Carcinoma	factor(sample_subtypes)Sarcomatoid Renal Cell Carcinoma	-0.265	11258.6	0	1	1
BRAF	Renal Cell Carcinoma	factor(sample_subtypes)Translocation-Associated Renal Cell Carcinoma	0.271	9151.2	0	1	1
BRAF	Renal Cell Carcinoma	factor(sample_subtypes)Unclassified Renal Cell Carcinoma	0.061	6678.41	0	1	1
BRAF	Renal Cell Carcinoma	factor(sample_all$sex)Male	0.513	1.089	0.471	0.638	1
BRAF	Renal Cell Carcinoma	factor(sample_status)1	1.051	0.77	1.364	0.173	1
BRAF	Hepatobiliary Cancer	factor(aya_status)1	-0.626	0.732	-0.855	0.392	1
BRAF	Hepatobiliary Cancer	factor(sample_subtypes)Extrahepatic Cholangiocarcinoma	-1.225	0.632	-1.937	0.0527	0.922
BRAF	Hepatobiliary Cancer	factor(sample_subtypes)Fibrolamellar Carcinoma	-15.468	1013.64	-0.015	0.988	1
BRAF	Hepatobiliary Cancer	factor(sample_subtypes)Gallbladder Adenocarcinoma, NOS	-1.633	1.039	-1.571	0.116	1
BRAF	Hepatobiliary Cancer	factor(sample_subtypes)Gallbladder Cancer	-1.571	0.637	-2.468	0.0136	0.47
BRAF	Hepatobiliary Cancer	factor(sample_subtypes)Hepatoblastoma	-15.862	1170.72	-0.014	0.989	1
BRAF	Hepatobiliary Cancer	factor(sample_subtypes)Hepatocellular Carcinoma	-0.901	0.422	-2.136	0.0326	0.746
BRAF	Hepatobiliary Cancer	factor(sample_subtypes)Hepatocellular Carcinoma plus Intrahepatic Cholangiocarcinoma	-0.428	0.764	-0.56	0.575	1
BRAF	Hepatobiliary Cancer	factor(sample_subtypes)Intrahepatic Cholangiocarcinoma	-0.158	0.31	-0.51	0.61	1
BRAF	Hepatobiliary Cancer	factor(sample_subtypes)others	-0.008	1.063	-0.008	0.994	1
BRAF	Hepatobiliary Cancer	factor(sample_subtypes)Perihilar Cholangiocarcinoma	-0.247	1.056	-0.234	0.815	1
BRAF	Hepatobiliary Cancer	factor(sample_all$sex)Male	-0.146	0.255	-0.573	0.567	1
BRAF	Hepatobiliary Cancer	factor(sample_status)1	-0.014	0.287	-0.049	0.961	1
BRAF	Pancreatic Cancer	factor(aya_status)1	-0.015	0.62	-0.024	0.98	1
BRAF	Pancreatic Cancer	factor(sample_subtypes)Adenosquamous Carcinoma of the Pancreas	-0.266	0.943	-0.282	0.778	1
BRAF	Pancreatic Cancer	factor(sample_subtypes)Intraductal Papillary Mucinous Neoplasm	1.972	0.807	2.443	0.0146	0.489
BRAF	Pancreatic Cancer	factor(sample_subtypes)others	-14.478	1055.21	-0.014	0.989	1
BRAF	Pancreatic Cancer	factor(sample_subtypes)Pancreatic Adenocarcinoma	-1.24	0.618	-2.005	0.045	0.86
BRAF	Pancreatic Cancer	factor(sample_subtypes)Pancreatic Neuroendocrine Tumor	-0.478	0.659	-0.725	0.468	1
BRAF	Pancreatic Cancer	factor(sample_subtypes)Solid Pseudopapillary Neoplasm of the Pancreas	-14.775	901.577	-0.016	0.987	1
BRAF	Pancreatic Cancer	factor(sample_subtypes)Undifferentiated Carcinoma of the Pancreas	-14.64	681.267	-0.021	0.983	1
BRAF	Pancreatic Cancer	factor(sample_all$sex)Male	-0.415	0.238	-1.743	0.0814	1
BRAF	Pancreatic Cancer	factor(sample_status)1	0.763	0.247	3.084	0.00204	0.143
BRAF	Cervical Cancer	factor(aya_status)1	-16.551	1690.56	-0.01	0.992	1
BRAF	Cervical Cancer	factor(sample_subtypes)Cervical Adenosquamous Carcinoma	17.206	3475.3	0.005	0.996	1
BRAF	Cervical Cancer	factor(sample_subtypes)Cervical Squamous Cell Carcinoma	16.008	3475.3	0.005	0.996	1
BRAF	Cervical Cancer	factor(sample_subtypes)Endocervical Adenocarcinoma	15.867	3475.3	0.005	0.996	1
BRAF	Cervical Cancer	factor(sample_subtypes)Gastric Type Mucinous Carcinoma	16.898	3475.3	0.005	0.996	1
BRAF	Cervical Cancer	factor(sample_subtypes)others	16.249	3475.3	0.005	0.996	1
BRAF	Cervical Cancer	factor(sample_all$sex)Male	-16.44	12366.8	-0.001	0.999	1
BRAF	Cervical Cancer	factor(sample_status)1	-1.001	1.11	-0.902	0.367	1
BRAF	CNS Cancer	factor(aya_status)1	0.326	0.846	0.385	0.7	1
BRAF	CNS Cancer	factor(sample_subtypes)Anaplastic Meningioma	-17.087	3468.53	-0.005	0.996	1
BRAF	CNS Cancer	factor(sample_subtypes)Atypical Meningioma	-17.056	2031.08	-0.008	0.993	1
BRAF	CNS Cancer	factor(sample_subtypes)Meningioma	-0.685	0.893	-0.767	0.443	1
BRAF	CNS Cancer	factor(sample_subtypes)others	0.065	1.02	0.064	0.949	1
BRAF	CNS Cancer	factor(sample_all$sex)Male	-0.04	0.748	-0.053	0.958	1
BRAF	CNS Cancer	factor(sample_status)1	0.253	1.114	0.227	0.82	1
BRAF	Mature B-Cell Neoplasms	factor(aya_status)1	0.264	0.564	0.467	0.64	1
BRAF	Mature B-Cell Neoplasms	factor(sample_subtypes)Diffuse Large B-Cell Lymphoma, NOS	0.225	0.485	0.463	0.643	1
BRAF	Mature B-Cell Neoplasms	factor(sample_subtypes)Follicular Lymphoma	-0.721	0.802	-0.9	0.368	1
BRAF	Mature B-Cell Neoplasms	factor(sample_subtypes)Mantle Cell Lymphoma	-14.268	684.2	-0.021	0.983	1
BRAF	Mature B-Cell Neoplasms	factor(sample_subtypes)Marginal Zone Lymphoma	0.637	1.094	0.582	0.56	1
BRAF	Mature B-Cell Neoplasms	factor(sample_subtypes)Mature B-Cell Neoplasms	-0.377	0.813	-0.464	0.643	1
BRAF	Mature B-Cell Neoplasms	factor(sample_subtypes)others	1.437	0.53	2.71	0.00672	0.307
BRAF	Mature B-Cell Neoplasms	factor(sample_subtypes)Plasma Cell Myeloma	0.12	0.581	0.207	0.836	1
BRAF	Mature B-Cell Neoplasms	factor(sample_all$sex)Male	0.597	0.37	1.612	0.107	1
BRAF	Mature B-Cell Neoplasms	factor(sample_status)1	0.765	0.581	1.317	0.188	1
BRAF	Head and Neck Cancer	factor(aya_status)1	-0.564	1.05	-0.537	0.591	1
BRAF	Head and Neck Cancer	factor(sample_subtypes)Head and Neck Neuroendocrine Carcinoma	0.224	1.463	0.153	0.878	1
BRAF	Head and Neck Cancer	factor(sample_subtypes)Head and Neck Squamous Cell Carcinoma	-0.307	1.071	-0.287	0.774	1
BRAF	Head and Neck Cancer	factor(sample_subtypes)Head and Neck Squamous Cell Carcinoma of Unknown Primary	0.198	1.463	0.136	0.892	1
BRAF	Head and Neck Cancer	factor(sample_subtypes)Hypopharynx Squamous Cell Carcinoma	-16.615	2581.01	-0.006	0.995	1
BRAF	Head and Neck Cancer	factor(sample_subtypes)Larynx Squamous Cell Carcinoma	-16.563	1272.84	-0.013	0.99	1
BRAF	Head and Neck Cancer	factor(sample_subtypes)Nasopharyngeal Carcinoma	-16.41	1484.77	-0.011	0.991	1
BRAF	Head and Neck Cancer	factor(sample_subtypes)Oral Cavity Squamous Cell Carcinoma	-1.013	1.102	-0.92	0.358	1
BRAF	Head and Neck Cancer	factor(sample_subtypes)Oropharynx Squamous Cell Carcinoma	-0.88	1.125	-0.782	0.434	1
BRAF	Head and Neck Cancer	factor(sample_subtypes)others	-0.841	1.452	-0.579	0.563	1
BRAF	Head and Neck Cancer	factor(sample_subtypes)Sinonasal Squamous Cell Carcinoma	-16.644	1912.14	-0.009	0.993	1
BRAF	Head and Neck Cancer	factor(sample_all$sex)Male	-0.585	0.405	-1.445	0.148	1
BRAF	Head and Neck Cancer	factor(sample_status)1	-0.626	0.46	-1.361	0.174	1
BRAF	Endometrial Cancer	factor(aya_status)1	-0.257	0.601	-0.427	0.669	1
BRAF	Endometrial Cancer	factor(sample_subtypes)others	-0.367	0.758	-0.484	0.628	1
BRAF	Endometrial Cancer	factor(sample_subtypes)Uterine Carcinosarcoma/Uterine Malignant Mixed Mullerian Tumor	-1.699	0.497	-3.422	0.000623	0.0598
BRAF	Endometrial Cancer	factor(sample_subtypes)Uterine Clear Cell Carcinoma	-0.93	0.623	-1.492	0.136	1
BRAF	Endometrial Cancer	factor(sample_subtypes)Uterine Dedifferentiated Carcinoma	-0.464	1.048	-0.443	0.658	1
BRAF	Endometrial Cancer	factor(sample_subtypes)Uterine Endometrioid Carcinoma	-0.248	0.237	-1.047	0.295	1
BRAF	Endometrial Cancer	factor(sample_subtypes)Uterine Mixed Endometrial Carcinoma	-0.337	0.47	-0.718	0.473	1
BRAF	Endometrial Cancer	factor(sample_subtypes)Uterine Serous Carcinoma/Uterine Papillary Serous Carcinoma	-1.828	0.434	-4.213	2.53e-05	0.00517
BRAF	Endometrial Cancer	factor(sample_subtypes)Uterine Undifferentiated Carcinoma	0.701	0.66	1.062	0.288	1
BRAF	Endometrial Cancer	factor(sample_status)1	0.116	0.208	0.559	0.576	1
BRAF	Salivary Gland Cancer	factor(aya_status)1	-17.664	5739.35	-0.003	0.998	1
BRAF	Salivary Gland Cancer	factor(sample_subtypes)Adenoid Cystic Carcinoma	16.561	7676.47	0.002	0.998	1
BRAF	Salivary Gland Cancer	factor(sample_subtypes)Mammary Analogue Secretory Carcinoma of Salivary Gland Origin	-0.815	12312.9	0	1	1
BRAF	Salivary Gland Cancer	factor(sample_subtypes)Mucoepidermoid Carcinoma	1.028	10436.9	0	1	1
BRAF	Salivary Gland Cancer	factor(sample_subtypes)Myoepithelial Carcinoma	1.108	11876.7	0	1	1
BRAF	Salivary Gland Cancer	factor(sample_subtypes)others	17.469	48880.9	0	1	1
BRAF	Salivary Gland Cancer	factor(sample_subtypes)Salivary Adenocarcinoma	19.265	7676.47	0.003	0.998	1
BRAF	Salivary Gland Cancer	factor(sample_subtypes)Salivary Carcinoma	18.953	7676.47	0.002	0.998	1
BRAF	Salivary Gland Cancer	factor(sample_subtypes)Salivary Carcinoma, Other	-0.568	10543	0	1	1
BRAF	Salivary Gland Cancer	factor(sample_subtypes)Salivary Duct Carcinoma	18.696	7676.47	0.002	0.998	1
BRAF	Salivary Gland Cancer	factor(sample_all$sex)Male	18.356	2747.37	0.007	0.995	1
BRAF	Salivary Gland Cancer	factor(sample_status)1	0.614	0.794	0.774	0.439	1
BRAF	Appendiceal Cancer	factor(aya_status)1	0.639	0.816	0.782	0.434	1
BRAF	Appendiceal Cancer	factor(sample_subtypes)Goblet Cell Carcinoid of the Appendix	-0.724	1.084	-0.668	0.504	1
BRAF	Appendiceal Cancer	factor(sample_subtypes)Mucinous Adenocarcinoma of the Appendix	-2.319	1.073	-2.162	0.0306	0.725
BRAF	Appendiceal Cancer	factor(sample_subtypes)others	0.988	1.153	0.857	0.392	1
BRAF	Appendiceal Cancer	factor(sample_subtypes)Signet Ring Cell Type of the Appendix	-0.118	1.093	-0.108	0.914	1
BRAF	Appendiceal Cancer	factor(sample_all$sex)Male	0.236	0.598	0.394	0.694	1
BRAF	Appendiceal Cancer	factor(sample_status)1	0.453	0.622	0.729	0.466	1
BRAF	Skin Cancer, Non-Melanoma	factor(aya_status)1	-1.8	1.126	-1.598	0.11	1
BRAF	Skin Cancer, Non-Melanoma	factor(sample_subtypes)Basal Cell Carcinoma	-2.024	0.714	-2.835	0.00458	0.243
BRAF	Skin Cancer, Non-Melanoma	factor(sample_subtypes)Cutaneous Squamous Cell Carcinoma	-1.862	0.578	-3.223	0.00127	0.101
BRAF	Skin Cancer, Non-Melanoma	factor(sample_subtypes)Dermatofibrosarcoma Protuberans	-17.683	1345.99	-0.013	0.99	1
BRAF	Skin Cancer, Non-Melanoma	factor(sample_subtypes)Extramammary Paget Disease	-2.852	0.858	-3.323	0.000889	0.0783
BRAF	Skin Cancer, Non-Melanoma	factor(sample_subtypes)Merkel Cell Carcinoma	-3.106	0.647	-4.798	1.6e-06	0.000532
BRAF	Skin Cancer, Non-Melanoma	factor(sample_subtypes)others	-17.729	1374.91	-0.013	0.99	1
BRAF	Skin Cancer, Non-Melanoma	factor(sample_subtypes)Sebaceous Carcinoma	-2.43	1.141	-2.129	0.0332	0.752
BRAF	Skin Cancer, Non-Melanoma	factor(sample_subtypes)Skin Adnexal Carcinoma	-17.813	1346.6	-0.013	0.989	1
BRAF	Skin Cancer, Non-Melanoma	factor(sample_all$sex)Male	0.144	0.396	0.365	0.715	1
BRAF	Skin Cancer, Non-Melanoma	factor(sample_status)1	-0.482	0.42	-1.148	0.251	1
BRAF	Bladder Cancer	factor(aya_status)1	-14.576	718.548	-0.02	0.984	1
BRAF	Bladder Cancer	factor(sample_subtypes)Bladder Squamous Cell Carcinoma	-13.574	883.911	-0.015	0.988	1
BRAF	Bladder Cancer	factor(sample_subtypes)Bladder Urothelial Carcinoma	1.093	1.017	1.075	0.282	1
BRAF	Bladder Cancer	factor(sample_subtypes)others	0.31	1.429	0.217	0.828	1
BRAF	Bladder Cancer	factor(sample_subtypes)Plasmacytoid/Signet Ring Cell Bladder Carcinoma	-13.518	958.349	-0.014	0.989	1
BRAF	Bladder Cancer	factor(sample_subtypes)Small Cell Bladder Cancer	1.448	1.248	1.16	0.246	1
BRAF	Bladder Cancer	factor(sample_subtypes)Upper Tract Urothelial Carcinoma	1.224	1.037	1.18	0.238	1
BRAF	Bladder Cancer	factor(sample_subtypes)Urethral Urothelial Carcinoma	1.736	1.178	1.474	0.141	1
BRAF	Bladder Cancer	factor(sample_all$sex)Male	-0.097	0.218	-0.447	0.655	1
BRAF	Bladder Cancer	factor(sample_status)1	-0.33	0.252	-1.309	0.191	1
BRAF	Histiocytosis	factor(aya_status)1	-2.291	0.749	-3.057	0.00223	0.152
BRAF	Histiocytosis	factor(sample_subtypes)Histiocytic and Dendritic Cell Neoplasms	-17.303	2303.81	-0.008	0.994	1
BRAF	Histiocytosis	factor(sample_subtypes)Langerhans Cell Histiocytosis	2.57	0.74	3.473	0.000514	0.0527
BRAF	Histiocytosis	factor(sample_subtypes)others	-17.36	3034.12	-0.006	0.995	1
BRAF	Histiocytosis	factor(sample_all$sex)Male	-1.057	0.591	-1.789	0.0737	1
BRAF	Histiocytosis	factor(sample_status)1	-18.659	3459.61	-0.005	0.996	1
BRAF	Gastrointestinal Neuroendocrine Tumor	factor(aya_status)1	-15.833	1901.58	-0.008	0.993	1
BRAF	Gastrointestinal Neuroendocrine Tumor	factor(sample_subtypes)High-Grade Neuroendocrine Carcinoma of the Colon and Rectum	2.813	0.775	3.63	0.000284	0.0343
BRAF	Gastrointestinal Neuroendocrine Tumor	factor(sample_subtypes)others	2.472	1.302	1.9	0.0575	0.957
BRAF	Gastrointestinal Neuroendocrine Tumor	factor(sample_subtypes)Small Bowel Well-Differentiated Neuroendocrine Tumor	0.079	1.008	0.078	0.938	1
BRAF	Gastrointestinal Neuroendocrine Tumor	factor(sample_subtypes)Well-Differentiated Neuroendocrine Tumor of the Appendix	-14.913	2591.15	-0.006	0.995	1
BRAF	Gastrointestinal Neuroendocrine Tumor	factor(sample_subtypes)Well-Differentiated Neuroendocrine Tumor of the Rectum	-15.161	2029.76	-0.007	0.994	1
BRAF	Gastrointestinal Neuroendocrine Tumor	factor(sample_all$sex)Male	-0.307	0.506	-0.606	0.545	1
BRAF	Gastrointestinal Neuroendocrine Tumor	factor(sample_status)1	0.549	0.51	1.077	0.281	1
HRAS	Glioma	factor(aya_status)1	0.803	0.53	1.514	0.13	1
HRAS	Glioma	factor(sample_subtypes)Anaplastic Oligoastrocytoma	0.126	7709.76	0	1	1
HRAS	Glioma	factor(sample_subtypes)Anaplastic Oligodendroglioma	18.267	2421.83	0.008	0.994	1
HRAS	Glioma	factor(sample_subtypes)Anaplastic Pleomorphic Xanthoastrocytoma	-0.1	10465.3	0	1	1
HRAS	Glioma	factor(sample_subtypes)Astrocytoma	0.066	3687.75	0	1	1
HRAS	Glioma	factor(sample_subtypes)Diffuse Astrocytoma	-0.069	5001.68	0	1	1
HRAS	Glioma	factor(sample_subtypes)Diffuse Glioma	-0.019	4575.08	0	1	1
HRAS	Glioma	factor(sample_subtypes)Diffuse Intrinsic Pontine Glioma	0.308	6750.32	0	1	1
HRAS	Glioma	factor(sample_subtypes)Dysembryoplastic Neuroepithelial Tumor	0.147	11252.4	0	1	1
HRAS	Glioma	factor(sample_subtypes)Encapsulated Glioma	0.091	9342.89	0	1	1
HRAS	Glioma	factor(sample_subtypes)Ependymoma	0.106	5712.91	0	1	1
HRAS	Glioma	factor(sample_subtypes)Ganglioglioma	0.056	5486.1	0	1	1
HRAS	Glioma	factor(sample_subtypes)Glioblastoma	17.918	2421.82	0.007	0.994	1
HRAS	Glioma	factor(sample_subtypes)Glioblastoma Multiforme	17.56	2421.82	0.007	0.994	1
HRAS	Glioma	factor(sample_subtypes)Glioma, NOS	0.028	5187.66	0	1	1
HRAS	Glioma	factor(sample_subtypes)Gliosarcoma	0.302	6907.35	0	1	1
HRAS	Glioma	factor(sample_subtypes)High-Grade Glioma, NOS	18.413	2421.82	0.008	0.994	1
HRAS	Glioma	factor(sample_subtypes)Low-Grade Glioma, NOS	0.126	4437.18	0	1	1
HRAS	Glioma	factor(sample_subtypes)Oligoastrocytoma	0.047	10044.2	0	1	1
HRAS	Glioma	factor(sample_subtypes)Oligodendroglioma	0.116	3793.01	0	1	1
HRAS	Glioma	factor(sample_subtypes)others	0.142	10709.7	0	1	1
HRAS	Glioma	factor(sample_subtypes)Pilocytic Astrocytoma	0.208	4114.18	0	1	1
HRAS	Glioma	factor(sample_subtypes)Pilomyxoid Astrocytoma	0.407	12205.9	0	1	1
HRAS	Glioma	factor(sample_subtypes)Pleomorphic Xanthoastrocytoma	0.131	10030.7	0	1	1
HRAS	Glioma	factor(sample_all$sex)Male	0.168	0.452	0.372	0.71	1
HRAS	Glioma	factor(sample_status)1	-0.867	1.034	-0.839	0.401	1
HRAS	Breast Cancer	factor(aya_status)1	-0.079	0.535	-0.147	0.883	1
HRAS	Breast Cancer	factor(sample_subtypes)Breast Invasive Cancer, NOS	-0.168	2979.39	0	1	1
HRAS	Breast Cancer	factor(sample_subtypes)Breast Invasive Carcinoma, NOS	-0.175	2877.33	0	1	1
HRAS	Breast Cancer	factor(sample_subtypes)Breast Invasive Ductal Carcinoma	14.921	2729.54	0.005	0.996	1
HRAS	Breast Cancer	factor(sample_subtypes)Breast Invasive Lobular Carcinoma	14.873	2729.54	0.005	0.996	1
HRAS	Breast Cancer	factor(sample_subtypes)Breast Invasive Mixed Mucinous Carcinoma	0.048	4414.24	0	1	1
HRAS	Breast Cancer	factor(sample_subtypes)Breast Mixed Ductal and Lobular Carcinoma	-0.011	2946.39	0	1	1
HRAS	Breast Cancer	factor(sample_subtypes)Invasive Breast Carcinoma	15.396	2729.54	0.006	0.995	1
HRAS	Breast Cancer	factor(sample_subtypes)Metaplastic Breast Cancer	17.919	2729.54	0.007	0.995	1
HRAS	Breast Cancer	factor(sample_subtypes)others	18.116	2729.54	0.007	0.995	1
HRAS	Breast Cancer	factor(sample_all$sex)Male	0.712	1.059	0.673	0.501	1
HRAS	Breast Cancer	factor(sample_status)1	0.414	0.34	1.215	0.224	1
HRAS	Colorectal Cancer	factor(aya_status)1	0.255	0.438	0.584	0.56	1
HRAS	Colorectal Cancer	factor(sample_subtypes)Colorectal Adenocarcinoma	-0.684	0.529	-1.291	0.197	1
HRAS	Colorectal Cancer	factor(sample_subtypes)Mucinous Adenocarcinoma of the Colon and Rectum	0.744	0.606	1.226	0.22	1
HRAS	Colorectal Cancer	factor(sample_subtypes)others	1.955	1.048	1.865	0.0621	0.988
HRAS	Colorectal Cancer	factor(sample_subtypes)Rectal Adenocarcinoma	-0.384	0.417	-0.922	0.357	1
HRAS	Colorectal Cancer	factor(sample_subtypes)Signet Ring Cell Adenocarcinoma of the Colon and Rectum	-12.675	647.528	-0.02	0.984	1
HRAS	Colorectal Cancer	factor(sample_all$sex)Male	-0.229	0.285	-0.803	0.422	1
HRAS	Colorectal Cancer	factor(sample_status)1	-0.595	0.356	-1.671	0.0947	1
HRAS	Soft Tissue Sarcoma	factor(aya_status)1	-0.898	0.798	-1.125	0.26	1
HRAS	Soft Tissue Sarcoma	factor(sample_subtypes)Alveolar Soft Part Sarcoma	0.386	11297.8	0	1	1
HRAS	Soft Tissue Sarcoma	factor(sample_subtypes)Angiosarcoma	18.803	7023.42	0.003	0.998	1
HRAS	Soft Tissue Sarcoma	factor(sample_subtypes)Clear Cell Sarcoma	0.27	11460.1	0	1	1
HRAS	Soft Tissue Sarcoma	factor(sample_subtypes)Dedifferentiated Liposarcoma	-0.317	7650.49	0	1	1
HRAS	Soft Tissue Sarcoma	factor(sample_subtypes)Desmoid/Aggressive Fibromatosis	-0.311	9096.06	0	1	1
HRAS	Soft Tissue Sarcoma	factor(sample_subtypes)Desmoplastic Small-Round-Cell Tumor	19.05	7023.42	0.003	0.998	1
HRAS	Soft Tissue Sarcoma	factor(sample_subtypes)Embryonal Rhabdomyosarcoma	19.336	7023.42	0.003	0.998	1
HRAS	Soft Tissue Sarcoma	factor(sample_subtypes)Epithelioid Hemangioendothelioma	-0.328	10158.1	0	1	1
HRAS	Soft Tissue Sarcoma	factor(sample_subtypes)Epithelioid Sarcoma	0.032	10160.8	0	1	1
HRAS	Soft Tissue Sarcoma	factor(sample_subtypes)Fibrosarcoma	-0.119	14064.6	0	1	1
HRAS	Soft Tissue Sarcoma	factor(sample_subtypes)Follicular Dendritic Cell Sarcoma	-0.384	14142	0	1	1
HRAS	Soft Tissue Sarcoma	factor(sample_subtypes)Hemangioma	-0.371	8337.45	0	1	1
HRAS	Soft Tissue Sarcoma	factor(sample_subtypes)Inflammatory Myofibroblastic Tumor	-0.199	12307.7	0	1	1
HRAS	Soft Tissue Sarcoma	factor(sample_subtypes)Intimal Sarcoma	19.317	7023.42	0.003	0.998	1
HRAS	Soft Tissue Sarcoma	factor(sample_subtypes)Leiomyosarcoma	16.706	7023.42	0.002	0.998	1
HRAS	Soft Tissue Sarcoma	factor(sample_subtypes)Liposarcoma	0.044	11614.8	0	1	1
HRAS	Soft Tissue Sarcoma	factor(sample_subtypes)Myxofibrosarcoma	-0.309	8957.69	0	1	1
HRAS	Soft Tissue Sarcoma	factor(sample_subtypes)Myxoid/Round-Cell Liposarcoma	-0.084	8937.49	0	1	1
HRAS	Soft Tissue Sarcoma	factor(sample_subtypes)others	17.658	7023.42	0.003	0.998	1
HRAS	Soft Tissue Sarcoma	factor(sample_subtypes)Perivascular Epithelioid Cell Tumor	-0.058	10230.3	0	1	1
HRAS	Soft Tissue Sarcoma	factor(sample_subtypes)Pleomorphic Liposarcoma	-0.155	10395	0	1	1
HRAS	Soft Tissue Sarcoma	factor(sample_subtypes)Radiation-Associated Sarcoma	20.55	7023.42	0.003	0.998	1
HRAS	Soft Tissue Sarcoma	factor(sample_subtypes)Rhabdomyosarcoma	18.859	7023.42	0.003	0.998	1
HRAS	Soft Tissue Sarcoma	factor(sample_subtypes)Round Cell Sarcoma, NOS	-0.315	10299.3	0	1	1
HRAS	Soft Tissue Sarcoma	factor(sample_subtypes)Sarcoma, NOS	16.33	7023.42	0.002	0.998	1
HRAS	Soft Tissue Sarcoma	factor(sample_subtypes)Soft Tissue Myoepithelial Carcinoma	0.289	13738.9	0	1	1
HRAS	Soft Tissue Sarcoma	factor(sample_subtypes)Solitary Fibrous Tumor/Hemangiopericytoma	-0.196	8543.59	0	1	1
HRAS	Soft Tissue Sarcoma	factor(sample_subtypes)Synovial Sarcoma	0.036	8073.5	0	1	1
HRAS	Soft Tissue Sarcoma	factor(sample_subtypes)Undifferentiated Pleomorphic Sarcoma/Malignant Fibrous Histiocytoma/High-Grade Spindle Cell Sarcoma	17.865	7023.42	0.003	0.998	1
HRAS	Soft Tissue Sarcoma	factor(sample_subtypes)Well-Differentiated Liposarcoma	-0.221	8736.53	0	1	1
HRAS	Soft Tissue Sarcoma	factor(sample_all$sex)Male	0.228	0.476	0.478	0.632	1
HRAS	Soft Tissue Sarcoma	factor(sample_status)1	-1.23	0.768	-1.603	0.109	1
HRAS	Melanoma	factor(aya_status)1	-0.665	0.598	-1.112	0.266	1
HRAS	Melanoma	factor(sample_subtypes)Anorectal Mucosal Melanoma	-16.733	1068.09	-0.016	0.988	1
HRAS	Melanoma	factor(sample_subtypes)Cutaneous Melanoma	-0.841	0.438	-1.919	0.055	0.937
HRAS	Melanoma	factor(sample_subtypes)Desmoplastic Melanoma	-16.683	2533.25	-0.007	0.995	1
HRAS	Melanoma	factor(sample_subtypes)Head and Neck Mucosal Melanoma	-1.471	1.085	-1.357	0.175	1
HRAS	Melanoma	factor(sample_subtypes)Melanoma	-0.656	0.441	-1.488	0.137	1
HRAS	Melanoma	factor(sample_subtypes)Melanoma of Unknown Primary	-0.556	0.556	-1	0.317	1
HRAS	Melanoma	factor(sample_subtypes)Mucosal Melanoma of the Vulva/Vagina	-0.812	0.829	-0.98	0.327	1
HRAS	Melanoma	factor(sample_subtypes)Ocular Melanoma	-16.714	2288.3	-0.007	0.994	1
HRAS	Melanoma	factor(sample_subtypes)others	-16.744	1678.15	-0.01	0.992	1
HRAS	Melanoma	factor(sample_subtypes)Uveal Melanoma	-16.676	813.017	-0.021	0.984	1
HRAS	Melanoma	factor(sample_all$sex)Male	-0.224	0.256	-0.873	0.383	1
HRAS	Melanoma	factor(sample_status)1	-0.005	0.27	-0.02	0.984	1
HRAS	Thyroid Cancer	factor(aya_status)1	0.057	0.363	0.158	0.874	1
HRAS	Thyroid Cancer	factor(sample_subtypes)Follicular Thyroid Cancer	2.184	0.636	3.433	0.000597	0.0584
HRAS	Thyroid Cancer	factor(sample_subtypes)Hurthle Cell Thyroid Cancer	-14.926	776.606	-0.019	0.985	1
HRAS	Thyroid Cancer	factor(sample_subtypes)Medullary Thyroid Cancer	1.359	0.62	2.192	0.0284	0.699
HRAS	Thyroid Cancer	factor(sample_subtypes)others	1.16	1.17	0.991	0.322	1
HRAS	Thyroid Cancer	factor(sample_subtypes)Papillary Thyroid Cancer	-0.008	0.559	-0.014	0.989	1
HRAS	Thyroid Cancer	factor(sample_subtypes)Poorly Differentiated Thyroid Cancer	0.475	0.643	0.739	0.46	1
HRAS	Thyroid Cancer	factor(sample_all$sex)Male	-0.619	0.307	-2.013	0.0441	0.853
HRAS	Thyroid Cancer	factor(sample_status)1	-0.844	0.335	-2.516	0.0119	0.435
HRAS	Non-Small Cell Lung Cancer	factor(aya_status)1	-14.261	788.739	-0.018	0.986	1
HRAS	Non-Small Cell Lung Cancer	factor(sample_subtypes)Large Cell Lung Carcinoma	-0.025	2960.9	0	1	1
HRAS	Non-Small Cell Lung Cancer	factor(sample_subtypes)Large Cell Neuroendocrine Carcinoma	15.184	1250.14	0.012	0.99	1
HRAS	Non-Small Cell Lung Cancer	factor(sample_subtypes)Lung Adenocarcinoma	14.266	1250.14	0.011	0.991	1
HRAS	Non-Small Cell Lung Cancer	factor(sample_subtypes)Lung Adenosquamous Carcinoma	15.23	1250.14	0.012	0.99	1
HRAS	Non-Small Cell Lung Cancer	factor(sample_subtypes)Lung Carcinoid	0.217	1529.34	0	1	1
HRAS	Non-Small Cell Lung Cancer	factor(sample_subtypes)Lung Neuroendocrine Tumor	0.052	1958.85	0	1	1
HRAS	Non-Small Cell Lung Cancer	factor(sample_subtypes)Lung Squamous Cell Carcinoma	14.714	1250.14	0.012	0.991	1
HRAS	Non-Small Cell Lung Cancer	factor(sample_subtypes)Non-Small Cell Lung Cancer	15.262	1250.14	0.012	0.99	1
HRAS	Non-Small Cell Lung Cancer	factor(sample_subtypes)others	0.184	2126.64	0	1	1
HRAS	Non-Small Cell Lung Cancer	factor(sample_subtypes)Pleomorphic Carcinoma of the Lung	-0.038	1932.96	0	1	1
HRAS	Non-Small Cell Lung Cancer	factor(sample_subtypes)Poorly Differentiated Non-Small Cell Lung Cancer	14.318	1250.14	0.011	0.991	1
HRAS	Non-Small Cell Lung Cancer	factor(sample_subtypes)Sarcomatoid Carcinoma of the Lung	-0.13	1990.76	0	1	1
HRAS	Non-Small Cell Lung Cancer	factor(sample_all$sex)Male	0.353	0.249	1.418	0.156	1
HRAS	Non-Small Cell Lung Cancer	factor(sample_status)1	0.171	0.251	0.68	0.496	1
HRAS	Cancer of Unknown Primary	factor(aya_status)1	-0.307	1.039	-0.296	0.767	1
HRAS	Cancer of Unknown Primary	factor(sample_subtypes)Cancer of Unknown Primary	1.466	1.124	1.304	0.192	1
HRAS	Cancer of Unknown Primary	factor(sample_subtypes)Cancer of Unknown Primary, NOS	2.471	1.158	2.133	0.0329	0.748
HRAS	Cancer of Unknown Primary	factor(sample_subtypes)Neuroendocrine Carcinoma, NOS	2.189	1.231	1.778	0.0753	1
HRAS	Cancer of Unknown Primary	factor(sample_subtypes)Neuroendocrine Tumor, NOS	1.152	1.418	0.812	0.417	1
HRAS	Cancer of Unknown Primary	factor(sample_subtypes)others	4.245	1.462	2.905	0.00368	0.212
HRAS	Cancer of Unknown Primary	factor(sample_subtypes)Poorly Differentiated Carcinoma, NOS	1.669	1.227	1.36	0.174	1
HRAS	Cancer of Unknown Primary	factor(sample_subtypes)Small Cell Carcinoma of Unknown Primary	-12.032	912.296	-0.013	0.989	1
HRAS	Cancer of Unknown Primary	factor(sample_subtypes)Squamous Cell Carcinoma, NOS	3.026	1.089	2.78	0.00543	0.27
HRAS	Cancer of Unknown Primary	factor(sample_subtypes)Undifferentiated Malignant Neoplasm	2.609	1.24	2.103	0.0354	0.774
HRAS	Cancer of Unknown Primary	factor(sample_all$sex)Male	-0.139	0.436	-0.319	0.75	1
HRAS	Cancer of Unknown Primary	factor(sample_all$sex)Unknown	-14.619	6522.64	-0.002	0.998	1
HRAS	Cancer of Unknown Primary	factor(sample_status)1	-0.271	0.46	-0.589	0.556	1
HRAS	Esophagogastric Cancer	factor(aya_status)1	-16.555	3801.26	-0.004	0.997	1
HRAS	Esophagogastric Cancer	factor(sample_subtypes)Diffuse Type Stomach Adenocarcinoma	0.14	9345.7	0	1	1
HRAS	Esophagogastric Cancer	factor(sample_subtypes)Esophageal Adenocarcinoma	15.816	2589.59	0.006	0.995	1
HRAS	Esophagogastric Cancer	factor(sample_subtypes)Esophageal Poorly Differentiated Carcinoma	0.024	7323.95	0	1	1
HRAS	Esophagogastric Cancer	factor(sample_subtypes)Esophageal Squamous Cell Carcinoma	18.348	2589.59	0.007	0.994	1
HRAS	Esophagogastric Cancer	factor(sample_subtypes)Esophagogastric Adenocarcinoma	-0.009	4073.89	0	1	1
HRAS	Esophagogastric Cancer	factor(sample_subtypes)Intestinal Type Stomach Adenocarcinoma	0.102	9197.3	0	1	1
HRAS	Esophagogastric Cancer	factor(sample_subtypes)others	0.344	9997.83	0	1	1
HRAS	Esophagogastric Cancer	factor(sample_subtypes)Poorly Differentiated Carcinoma of the Stomach	18.232	2589.59	0.007	0.994	1
HRAS	Esophagogastric Cancer	factor(sample_subtypes)Signet Ring Cell Carcinoma of the Stomach	0.338	5988.42	0	1	1
HRAS	Esophagogastric Cancer	factor(sample_subtypes)Stomach Adenocarcinoma	17.352	2589.59	0.007	0.995	1
HRAS	Esophagogastric Cancer	factor(sample_subtypes)Tubular Stomach Adenocarcinoma	19.76	2589.59	0.008	0.994	1
HRAS	Esophagogastric Cancer	factor(sample_all$sex)Male	0.553	0.837	0.661	0.509	1
HRAS	Esophagogastric Cancer	factor(sample_status)1	0.17	0.845	0.201	0.841	1
HRAS	Pancreatic Cancer	factor(aya_status)1	-15.443	1640.34	-0.009	0.992	1
HRAS	Pancreatic Cancer	factor(sample_subtypes)Adenosquamous Carcinoma of the Pancreas	-16.644	2390.12	-0.007	0.994	1
HRAS	Pancreatic Cancer	factor(sample_subtypes)Intraductal Papillary Mucinous Neoplasm	-16.619	3779.48	-0.004	0.996	1
HRAS	Pancreatic Cancer	factor(sample_subtypes)others	-16.547	4684.15	-0.004	0.997	1
HRAS	Pancreatic Cancer	factor(sample_subtypes)Pancreatic Adenocarcinoma	-2.283	1.106	-2.065	0.0389	0.807
HRAS	Pancreatic Cancer	factor(sample_subtypes)Pancreatic Neuroendocrine Tumor	-0.6	1.138	-0.527	0.598	1
HRAS	Pancreatic Cancer	factor(sample_subtypes)Solid Pseudopapillary Neoplasm of the Pancreas	-16.475	3962.19	-0.004	0.997	1
HRAS	Pancreatic Cancer	factor(sample_subtypes)Undifferentiated Carcinoma of the Pancreas	-16.618	3070.47	-0.005	0.996	1
HRAS	Pancreatic Cancer	factor(sample_all$sex)Male	-0.105	0.614	-0.171	0.864	1
HRAS	Pancreatic Cancer	factor(sample_status)1	0.138	0.611	0.226	0.821	1
HRAS	Head and Neck Cancer	factor(aya_status)1	-0.295	0.759	-0.389	0.697	1
HRAS	Head and Neck Cancer	factor(sample_subtypes)Head and Neck Neuroendocrine Carcinoma	17.006	1347.18	0.013	0.99	1
HRAS	Head and Neck Cancer	factor(sample_subtypes)Head and Neck Squamous Cell Carcinoma	15.085	1347.18	0.011	0.991	1
HRAS	Head and Neck Cancer	factor(sample_subtypes)Head and Neck Squamous Cell Carcinoma of Unknown Primary	15.642	1347.18	0.012	0.991	1
HRAS	Head and Neck Cancer	factor(sample_subtypes)Hypopharynx Squamous Cell Carcinoma	-0.142	2068.65	0	1	1
HRAS	Head and Neck Cancer	factor(sample_subtypes)Larynx Squamous Cell Carcinoma	14.9	1347.18	0.011	0.991	1
HRAS	Head and Neck Cancer	factor(sample_subtypes)Nasopharyngeal Carcinoma	0.084	1622.42	0	1	1
HRAS	Head and Neck Cancer	factor(sample_subtypes)Oral Cavity Squamous Cell Carcinoma	15.268	1347.18	0.011	0.991	1
HRAS	Head and Neck Cancer	factor(sample_subtypes)Oropharynx Squamous Cell Carcinoma	14.336	1347.18	0.011	0.992	1
HRAS	Head and Neck Cancer	factor(sample_subtypes)others	15.369	1347.18	0.011	0.991	1
HRAS	Head and Neck Cancer	factor(sample_subtypes)Sinonasal Squamous Cell Carcinoma	16.181	1347.18	0.012	0.99	1
HRAS	Head and Neck Cancer	factor(sample_all$sex)Male	-0.217	0.347	-0.627	0.531	1
HRAS	Head and Neck Cancer	factor(sample_status)1	-0.721	0.398	-1.814	0.0697	1
HRAS	Endometrial Cancer	factor(aya_status)1	-15.251	1325.92	-0.012	0.991	1
HRAS	Endometrial Cancer	factor(sample_subtypes)others	-15.081	1761.14	-0.009	0.993	1
HRAS	Endometrial Cancer	factor(sample_subtypes)Uterine Carcinosarcoma/Uterine Malignant Mixed Mullerian Tumor	-1.443	1.121	-1.288	0.198	1
HRAS	Endometrial Cancer	factor(sample_subtypes)Uterine Clear Cell Carcinoma	-15.204	1123.17	-0.014	0.989	1
HRAS	Endometrial Cancer	factor(sample_subtypes)Uterine Dedifferentiated Carcinoma	-15.217	2380.37	-0.006	0.995	1
HRAS	Endometrial Cancer	factor(sample_subtypes)Uterine Endometrioid Carcinoma	0.173	0.549	0.315	0.753	1
HRAS	Endometrial Cancer	factor(sample_subtypes)Uterine Mixed Endometrial Carcinoma	-0.306	1.124	-0.272	0.786	1
HRAS	Endometrial Cancer	factor(sample_subtypes)Uterine Serous Carcinoma/Uterine Papillary Serous Carcinoma	-1.226	0.869	-1.411	0.158	1
HRAS	Endometrial Cancer	factor(sample_subtypes)Uterine Undifferentiated Carcinoma	-15.272	2326.95	-0.007	0.995	1
HRAS	Endometrial Cancer	factor(sample_status)1	-0.57	0.541	-1.053	0.292	1
HRAS	Salivary Gland Cancer	factor(aya_status)1	-0.867	1.078	-0.805	0.421	1
HRAS	Salivary Gland Cancer	factor(sample_subtypes)Adenoid Cystic Carcinoma	15.494	1893.03	0.008	0.993	1
HRAS	Salivary Gland Cancer	factor(sample_subtypes)Mammary Analogue Secretory Carcinoma of Salivary Gland Origin	0.021	2943.51	0	1	1
HRAS	Salivary Gland Cancer	factor(sample_subtypes)Mucoepidermoid Carcinoma	17.039	1893.03	0.009	0.993	1
HRAS	Salivary Gland Cancer	factor(sample_subtypes)Myoepithelial Carcinoma	0.35	3061.54	0	1	1
HRAS	Salivary Gland Cancer	factor(sample_subtypes)others	0.261	10919.4	0	1	1
HRAS	Salivary Gland Cancer	factor(sample_subtypes)Salivary Adenocarcinoma	16.423	1893.03	0.009	0.993	1
HRAS	Salivary Gland Cancer	factor(sample_subtypes)Salivary Carcinoma	16.776	1893.03	0.009	0.993	1
HRAS	Salivary Gland Cancer	factor(sample_subtypes)Salivary Carcinoma, Other	16.93	1893.03	0.009	0.993	1
HRAS	Salivary Gland Cancer	factor(sample_subtypes)Salivary Duct Carcinoma	17.847	1893.03	0.009	0.992	1
HRAS	Salivary Gland Cancer	factor(sample_all$sex)Male	1.002	0.535	1.874	0.0609	0.978
HRAS	Salivary Gland Cancer	factor(sample_status)1	-0.65	0.426	-1.525	0.127	1
HRAS	Skin Cancer, Non-Melanoma	factor(aya_status)1	1.699	0.819	2.075	0.038	0.8
HRAS	Skin Cancer, Non-Melanoma	factor(sample_subtypes)Basal Cell Carcinoma	-1.005	1.333	-0.754	0.451	1
HRAS	Skin Cancer, Non-Melanoma	factor(sample_subtypes)Cutaneous Squamous Cell Carcinoma	0.952	0.973	0.979	0.328	1
HRAS	Skin Cancer, Non-Melanoma	factor(sample_subtypes)Dermatofibrosarcoma Protuberans	-16.923	2196.8	-0.008	0.994	1
HRAS	Skin Cancer, Non-Melanoma	factor(sample_subtypes)Extramammary Paget Disease	-16.177	1340.71	-0.012	0.99	1
HRAS	Skin Cancer, Non-Melanoma	factor(sample_subtypes)Merkel Cell Carcinoma	-0.091	0.985	-0.092	0.927	1
HRAS	Skin Cancer, Non-Melanoma	factor(sample_subtypes)others	-16.538	2240.97	-0.007	0.994	1
HRAS	Skin Cancer, Non-Melanoma	factor(sample_subtypes)Sebaceous Carcinoma	0.16	1.401	0.114	0.909	1
HRAS	Skin Cancer, Non-Melanoma	factor(sample_subtypes)Skin Adnexal Carcinoma	0.149	1.359	0.109	0.913	1
HRAS	Skin Cancer, Non-Melanoma	factor(sample_all$sex)Male	0.393	0.436	0.901	0.367	1
HRAS	Skin Cancer, Non-Melanoma	factor(sample_status)1	0.178	0.372	0.478	0.633	1
HRAS	Bladder Cancer	factor(aya_status)1	1.406	0.562	2.501	0.0124	0.447
HRAS	Bladder Cancer	factor(sample_subtypes)Bladder Squamous Cell Carcinoma	1.193	1.446	0.825	0.409	1
HRAS	Bladder Cancer	factor(sample_subtypes)Bladder Urothelial Carcinoma	0.569	1.022	0.556	0.578	1
HRAS	Bladder Cancer	factor(sample_subtypes)others	0.224	1.433	0.156	0.876	1
HRAS	Bladder Cancer	factor(sample_subtypes)Plasmacytoid/Signet Ring Cell Bladder Carcinoma	-13.569	950.602	-0.014	0.989	1
HRAS	Bladder Cancer	factor(sample_subtypes)Small Cell Bladder Cancer	-13.578	730.539	-0.019	0.985	1
HRAS	Bladder Cancer	factor(sample_subtypes)Upper Tract Urothelial Carcinoma	1.914	1.028	1.861	0.0627	0.991
HRAS	Bladder Cancer	factor(sample_subtypes)Urethral Urothelial Carcinoma	-13.517	664.041	-0.02	0.984	1
HRAS	Bladder Cancer	factor(sample_all$sex)Male	0.671	0.271	2.478	0.0132	0.463
HRAS	Bladder Cancer	factor(sample_status)1	-0.492	0.288	-1.712	0.0869	1
IDH1	Glioma	factor(aya_status)1	1.864	0.098	18.978	2.58e-80	2.66e-75
IDH1	Glioma	factor(sample_subtypes)Anaplastic Oligoastrocytoma	1.59	0.504	3.153	0.00162	0.12
IDH1	Glioma	factor(sample_subtypes)Anaplastic Oligodendroglioma	1.581	0.246	6.43	1.27e-10	1.2e-07
IDH1	Glioma	factor(sample_subtypes)Anaplastic Pleomorphic Xanthoastrocytoma	-18.533	784.247	-0.024	0.981	1
IDH1	Glioma	factor(sample_subtypes)Astrocytoma	-0.496	0.172	-2.883	0.00394	0.222
IDH1	Glioma	factor(sample_subtypes)Diffuse Astrocytoma	-0.092	0.235	-0.391	0.696	1
IDH1	Glioma	factor(sample_subtypes)Diffuse Glioma	-1.481	0.225	-6.569	5.06e-11	4.92e-08
IDH1	Glioma	factor(sample_subtypes)Diffuse Intrinsic Pontine Glioma	-3.431	0.739	-4.644	3.41e-06	0.000983
IDH1	Glioma	factor(sample_subtypes)Dysembryoplastic Neuroepithelial Tumor	-18.119	839.666	-0.022	0.983	1
IDH1	Glioma	factor(sample_subtypes)Encapsulated Glioma	-18.084	699.381	-0.026	0.979	1
IDH1	Glioma	factor(sample_subtypes)Ependymoma	-18.229	398.501	-0.046	0.964	1
IDH1	Glioma	factor(sample_subtypes)Ganglioglioma	-18.165	380.469	-0.048	0.962	1
IDH1	Glioma	factor(sample_subtypes)Glioblastoma	-2.499	0.162	-15.434	9.74e-54	1.26e-49
IDH1	Glioma	factor(sample_subtypes)Glioblastoma Multiforme	-2.502	0.143	-17.532	8.14e-69	1.68e-64
IDH1	Glioma	factor(sample_subtypes)Glioma, NOS	-1.948	0.276	-7.071	1.54e-12	2.01e-09
IDH1	Glioma	factor(sample_subtypes)Gliosarcoma	-3.403	0.74	-4.598	4.26e-06	0.00118
IDH1	Glioma	factor(sample_subtypes)High-Grade Glioma, NOS	-2.095	0.221	-9.48	2.54e-21	8.19e-18
IDH1	Glioma	factor(sample_subtypes)Low-Grade Glioma, NOS	-2.133	0.253	-8.444	3.08e-17	6.75e-14
IDH1	Glioma	factor(sample_subtypes)Oligoastrocytoma	1.493	0.652	2.288	0.0221	0.616
IDH1	Glioma	factor(sample_subtypes)Oligodendroglioma	1.174	0.199	5.897	3.7e-09	2.63e-06
IDH1	Glioma	factor(sample_subtypes)others	-17.952	814.093	-0.022	0.982	1
IDH1	Glioma	factor(sample_subtypes)Pilocytic Astrocytoma	-5.773	1.012	-5.703	1.18e-08	7.13e-06
IDH1	Glioma	factor(sample_subtypes)Pilomyxoid Astrocytoma	-17.703	960.822	-0.018	0.985	1
IDH1	Glioma	factor(sample_subtypes)Pleomorphic Xanthoastrocytoma	-3.958	1.053	-3.758	0.000171	0.0232
IDH1	Glioma	factor(sample_all$sex)Male	-0.029	0.088	-0.336	0.737	1
IDH1	Glioma	factor(sample_status)1	0.731	0.145	5.04	4.65e-07	0.000189
IDH1	Breast Cancer	factor(aya_status)1	-0.761	0.731	-1.041	0.298	1
IDH1	Breast Cancer	factor(sample_subtypes)Breast Invasive Cancer, NOS	-0.741	1.245	-0.595	0.552	1
IDH1	Breast Cancer	factor(sample_subtypes)Breast Invasive Carcinoma, NOS	-0.87	1.179	-0.738	0.46	1
IDH1	Breast Cancer	factor(sample_subtypes)Breast Invasive Ductal Carcinoma	-1.827	1.041	-1.756	0.0791	1
IDH1	Breast Cancer	factor(sample_subtypes)Breast Invasive Lobular Carcinoma	-1.613	1.13	-1.428	0.153	1
IDH1	Breast Cancer	factor(sample_subtypes)Breast Invasive Mixed Mucinous Carcinoma	-16.701	3455.64	-0.005	0.996	1
IDH1	Breast Cancer	factor(sample_subtypes)Breast Mixed Ductal and Lobular Carcinoma	-16.791	1107.14	-0.015	0.988	1
IDH1	Breast Cancer	factor(sample_subtypes)Invasive Breast Carcinoma	-1.116	1.071	-1.042	0.297	1
IDH1	Breast Cancer	factor(sample_subtypes)Metaplastic Breast Cancer	-16.734	2621.74	-0.006	0.995	1
IDH1	Breast Cancer	factor(sample_subtypes)others	-16.748	2058.71	-0.008	0.994	1
IDH1	Breast Cancer	factor(sample_all$sex)Male	-15.16	1945.92	-0.008	0.994	1
IDH1	Breast Cancer	factor(sample_status)1	-0.384	0.357	-1.076	0.282	1
IDH1	Colorectal Cancer	factor(aya_status)1	0.408	0.291	1.401	0.161	1
IDH1	Colorectal Cancer	factor(sample_subtypes)Colorectal Adenocarcinoma	-0.362	0.327	-1.109	0.268	1
IDH1	Colorectal Cancer	factor(sample_subtypes)Mucinous Adenocarcinoma of the Colon and Rectum	1.179	0.362	3.254	0.00114	0.0939
IDH1	Colorectal Cancer	factor(sample_subtypes)others	1.376	1.041	1.322	0.186	1
IDH1	Colorectal Cancer	factor(sample_subtypes)Rectal Adenocarcinoma	-0.451	0.305	-1.48	0.139	1
IDH1	Colorectal Cancer	factor(sample_subtypes)Signet Ring Cell Adenocarcinoma of the Colon and Rectum	-12.401	393.668	-0.032	0.975	1
IDH1	Colorectal Cancer	factor(sample_all$sex)Male	0.071	0.2	0.355	0.723	1
IDH1	Colorectal Cancer	factor(sample_status)1	-0.203	0.224	-0.905	0.365	1
IDH1	Soft Tissue Sarcoma	factor(aya_status)1	0.231	0.819	0.282	0.778	1
IDH1	Soft Tissue Sarcoma	factor(sample_subtypes)Alveolar Soft Part Sarcoma	-0.032	11216.7	0	1	1
IDH1	Soft Tissue Sarcoma	factor(sample_subtypes)Angiosarcoma	-0.044	8130.59	0	1	1
IDH1	Soft Tissue Sarcoma	factor(sample_subtypes)Clear Cell Sarcoma	0.02	11325.1	0	1	1
IDH1	Soft Tissue Sarcoma	factor(sample_subtypes)Dedifferentiated Liposarcoma	16.876	6960.94	0.002	0.998	1
IDH1	Soft Tissue Sarcoma	factor(sample_subtypes)Desmoid/Aggressive Fibromatosis	-0.002	8979.78	0	1	1
IDH1	Soft Tissue Sarcoma	factor(sample_subtypes)Desmoplastic Small-Round-Cell Tumor	-0.467	8709.91	0	1	1
IDH1	Soft Tissue Sarcoma	factor(sample_subtypes)Embryonal Rhabdomyosarcoma	-0.139	8997.1	0	1	1
IDH1	Soft Tissue Sarcoma	factor(sample_subtypes)Epithelioid Hemangioendothelioma	0.041	10027.9	0	1	1
IDH1	Soft Tissue Sarcoma	factor(sample_subtypes)Epithelioid Sarcoma	0.058	10075.6	0	1	1
IDH1	Soft Tissue Sarcoma	factor(sample_subtypes)Fibrosarcoma	-0.024	13947	0	1	1
IDH1	Soft Tissue Sarcoma	factor(sample_subtypes)Follicular Dendritic Cell Sarcoma	-0.321	14101.6	0	1	1
IDH1	Soft Tissue Sarcoma	factor(sample_subtypes)Hemangioma	18.437	6960.94	0.003	0.998	1
IDH1	Soft Tissue Sarcoma	factor(sample_subtypes)Inflammatory Myofibroblastic Tumor	0.12	12107.6	0	1	1
IDH1	Soft Tissue Sarcoma	factor(sample_subtypes)Intimal Sarcoma	-0.007	12148	0	1	1
IDH1	Soft Tissue Sarcoma	factor(sample_subtypes)Leiomyosarcoma	17.751	6960.94	0.003	0.998	1
IDH1	Soft Tissue Sarcoma	factor(sample_subtypes)Liposarcoma	0.336	11522.3	0	1	1
IDH1	Soft Tissue Sarcoma	factor(sample_subtypes)Myxofibrosarcoma	-0.008	8861.93	0	1	1
IDH1	Soft Tissue Sarcoma	factor(sample_subtypes)Myxoid/Round-Cell Liposarcoma	-0.193	8863.51	0	1	1
IDH1	Soft Tissue Sarcoma	factor(sample_subtypes)others	-0.043	8298.28	0	1	1
IDH1	Soft Tissue Sarcoma	factor(sample_subtypes)Perivascular Epithelioid Cell Tumor	0.349	10124.6	0	1	1
IDH1	Soft Tissue Sarcoma	factor(sample_subtypes)Pleomorphic Liposarcoma	-0.003	10286.3	0	1	1
IDH1	Soft Tissue Sarcoma	factor(sample_subtypes)Radiation-Associated Sarcoma	0.624	13368.5	0	1	1
IDH1	Soft Tissue Sarcoma	factor(sample_subtypes)Rhabdomyosarcoma	-0.232	9101.83	0	1	1
IDH1	Soft Tissue Sarcoma	factor(sample_subtypes)Round Cell Sarcoma, NOS	18.844	6960.94	0.003	0.998	1
IDH1	Soft Tissue Sarcoma	factor(sample_subtypes)Sarcoma, NOS	17.621	6960.94	0.003	0.998	1
IDH1	Soft Tissue Sarcoma	factor(sample_subtypes)Soft Tissue Myoepithelial Carcinoma	0.327	13601.8	0	1	1
IDH1	Soft Tissue Sarcoma	factor(sample_subtypes)Solitary Fibrous Tumor/Hemangiopericytoma	0.055	8453.17	0	1	1
IDH1	Soft Tissue Sarcoma	factor(sample_subtypes)Synovial Sarcoma	-0.11	8013.15	0	1	1
IDH1	Soft Tissue Sarcoma	factor(sample_subtypes)Undifferentiated Pleomorphic Sarcoma/Malignant Fibrous Histiocytoma/High-Grade Spindle Cell Sarcoma	16.941	6960.94	0.002	0.998	1
IDH1	Soft Tissue Sarcoma	factor(sample_subtypes)Well-Differentiated Liposarcoma	-0.028	8654.38	0	1	1
IDH1	Soft Tissue Sarcoma	factor(sample_all$sex)Male	1.58	0.804	1.966	0.0493	0.897
IDH1	Soft Tissue Sarcoma	factor(sample_status)1	-0.415	0.839	-0.494	0.621	1
IDH1	Melanoma	factor(aya_status)1	-1.12	0.593	-1.89	0.0588	0.962
IDH1	Melanoma	factor(sample_subtypes)Anorectal Mucosal Melanoma	-13.742	646.667	-0.021	0.983	1
IDH1	Melanoma	factor(sample_subtypes)Cutaneous Melanoma	1.776	1.015	1.75	0.0802	1
IDH1	Melanoma	factor(sample_subtypes)Desmoplastic Melanoma	-13.824	1535.54	-0.009	0.993	1
IDH1	Melanoma	factor(sample_subtypes)Head and Neck Mucosal Melanoma	0.508	1.425	0.356	0.721	1
IDH1	Melanoma	factor(sample_subtypes)Melanoma	1.715	1.019	1.683	0.0924	1
IDH1	Melanoma	factor(sample_subtypes)Melanoma of Unknown Primary	2.067	1.051	1.967	0.0492	0.897
IDH1	Melanoma	factor(sample_subtypes)Mucosal Melanoma of the Vulva/Vagina	-13.676	772.273	-0.018	0.986	1
IDH1	Melanoma	factor(sample_subtypes)Ocular Melanoma	-13.782	1384.82	-0.01	0.992	1
IDH1	Melanoma	factor(sample_subtypes)others	-13.825	1017.4	-0.014	0.989	1
IDH1	Melanoma	factor(sample_subtypes)Uveal Melanoma	-0.303	1.42	-0.214	0.831	1
IDH1	Melanoma	factor(sample_all$sex)Male	0.19	0.221	0.86	0.39	1
IDH1	Melanoma	factor(sample_status)1	-0.257	0.222	-1.155	0.248	1
IDH1	Bone Cancer	factor(aya_status)1	-0.306	0.64	-0.478	0.632	1
IDH1	Bone Cancer	factor(sample_subtypes)Chordoma	-20.626	3760.23	-0.005	0.996	1
IDH1	Bone Cancer	factor(sample_subtypes)Dedifferentiated Chondrosarcoma	0.182	0.636	0.287	0.774	1
IDH1	Bone Cancer	factor(sample_subtypes)Ewing Sarcoma	-20.619	2253.28	-0.009	0.993	1
IDH1	Bone Cancer	factor(sample_subtypes)Osteoblastic Osteosarcoma	-20.655	5409.22	-0.004	0.997	1
IDH1	Bone Cancer	factor(sample_subtypes)Osteosarcoma	-20.573	1911.08	-0.011	0.991	1
IDH1	Bone Cancer	factor(sample_subtypes)others	-3.418	1.043	-3.277	0.00105	0.0885
IDH1	Bone Cancer	factor(sample_all$sex)Male	0.025	0.478	0.052	0.959	1
IDH1	Bone Cancer	factor(sample_status)1	-0.471	0.489	-0.963	0.335	1
IDH1	Non-Small Cell Lung Cancer	factor(aya_status)1	-14.903	791.463	-0.019	0.985	1
IDH1	Non-Small Cell Lung Cancer	factor(sample_subtypes)Large Cell Lung Carcinoma	0.023	2952.84	0	1	1
IDH1	Non-Small Cell Lung Cancer	factor(sample_subtypes)Large Cell Neuroendocrine Carcinoma	15.585	1246.53	0.013	0.99	1
IDH1	Non-Small Cell Lung Cancer	factor(sample_subtypes)Lung Adenocarcinoma	14.895	1246.53	0.012	0.99	1
IDH1	Non-Small Cell Lung Cancer	factor(sample_subtypes)Lung Adenosquamous Carcinoma	16.764	1246.53	0.013	0.989	1
IDH1	Non-Small Cell Lung Cancer	factor(sample_subtypes)Lung Carcinoid	0.296	1525.67	0	1	1
IDH1	Non-Small Cell Lung Cancer	factor(sample_subtypes)Lung Neuroendocrine Tumor	15.652	1246.53	0.013	0.99	1
IDH1	Non-Small Cell Lung Cancer	factor(sample_subtypes)Lung Squamous Cell Carcinoma	14.575	1246.53	0.012	0.991	1
IDH1	Non-Small Cell Lung Cancer	factor(sample_subtypes)Non-Small Cell Lung Cancer	14.569	1246.53	0.012	0.991	1
IDH1	Non-Small Cell Lung Cancer	factor(sample_subtypes)others	16.13	1246.53	0.013	0.99	1
IDH1	Non-Small Cell Lung Cancer	factor(sample_subtypes)Pleomorphic Carcinoma of the Lung	16.44	1246.53	0.013	0.989	1
IDH1	Non-Small Cell Lung Cancer	factor(sample_subtypes)Poorly Differentiated Non-Small Cell Lung Cancer	14.979	1246.53	0.012	0.99	1
IDH1	Non-Small Cell Lung Cancer	factor(sample_subtypes)Sarcomatoid Carcinoma of the Lung	-0.051	1984.63	0	1	1
IDH1	Non-Small Cell Lung Cancer	factor(sample_all$sex)Male	0.083	0.196	0.422	0.673	1
IDH1	Non-Small Cell Lung Cancer	factor(sample_status)1	0.581	0.194	2.992	0.00278	0.175
IDH1	Ovarian Cancer	factor(aya_status)1	1.53	0.655	2.336	0.0195	0.575
IDH1	Ovarian Cancer	factor(sample_subtypes)Endometrioid Ovarian Cancer	0.317	1.012	0.313	0.754	1
IDH1	Ovarian Cancer	factor(sample_subtypes)High-Grade Serous Fallopian Tube Cancer	-15.78	2083.34	-0.008	0.994	1
IDH1	Ovarian Cancer	factor(sample_subtypes)High-Grade Serous Ovarian Cancer	-1.237	0.898	-1.377	0.169	1
IDH1	Ovarian Cancer	factor(sample_subtypes)Low-Grade Serous Ovarian Cancer	-0.861	1.249	-0.69	0.49	1
IDH1	Ovarian Cancer	factor(sample_subtypes)Mixed Ovarian Carcinoma	-15.896	2523.16	-0.006	0.995	1
IDH1	Ovarian Cancer	factor(sample_subtypes)Mucinous Ovarian Cancer	-16.542	2107.18	-0.008	0.994	1
IDH1	Ovarian Cancer	factor(sample_subtypes)others	-16.137	2963.18	-0.005	0.996	1
IDH1	Ovarian Cancer	factor(sample_subtypes)Ovarian Cancer, Other	1.389	1.258	1.104	0.27	1
IDH1	Ovarian Cancer	factor(sample_subtypes)Ovarian Carcinosarcoma/Malignant Mixed Mesodermal Tumor	0.161	1.248	0.129	0.897	1
IDH1	Ovarian Cancer	factor(sample_subtypes)Ovarian Epithelial Tumor	1.785	0.943	1.892	0.0584	0.961
IDH1	Ovarian Cancer	factor(sample_subtypes)Serous Borderline Ovarian Tumor	0.408	1.274	0.321	0.749	1
IDH1	Ovarian Cancer	factor(sample_subtypes)Serous Ovarian Cancer	1.267	0.935	1.356	0.175	1
IDH1	Ovarian Cancer	factor(sample_subtypes)Small Cell Carcinoma of the Ovary	-16.745	3580.96	-0.005	0.996	1
IDH1	Ovarian Cancer	factor(sample_status)1	-0.56	0.528	-1.062	0.288	1
IDH1	Cancer of Unknown Primary	factor(aya_status)1	-0.575	0.728	-0.789	0.43	1
IDH1	Cancer of Unknown Primary	factor(sample_subtypes)Cancer of Unknown Primary	0.262	0.333	0.788	0.431	1
IDH1	Cancer of Unknown Primary	factor(sample_subtypes)Cancer of Unknown Primary, NOS	0.577	0.435	1.328	0.184	1
IDH1	Cancer of Unknown Primary	factor(sample_subtypes)Neuroendocrine Carcinoma, NOS	-0.008	0.562	-0.015	0.988	1
IDH1	Cancer of Unknown Primary	factor(sample_subtypes)Neuroendocrine Tumor, NOS	-1.746	1.031	-1.693	0.0904	1
IDH1	Cancer of Unknown Primary	factor(sample_subtypes)others	-14.051	1244.6	-0.011	0.991	1
IDH1	Cancer of Unknown Primary	factor(sample_subtypes)Poorly Differentiated Carcinoma, NOS	-0.124	0.478	-0.258	0.796	1
IDH1	Cancer of Unknown Primary	factor(sample_subtypes)Small Cell Carcinoma of Unknown Primary	-13.921	552.373	-0.025	0.98	1
IDH1	Cancer of Unknown Primary	factor(sample_subtypes)Squamous Cell Carcinoma, NOS	-0.07	0.516	-0.136	0.892	1
IDH1	Cancer of Unknown Primary	factor(sample_subtypes)Undifferentiated Malignant Neoplasm	-1.024	1.038	-0.986	0.324	1
IDH1	Cancer of Unknown Primary	factor(sample_all$sex)Male	-0.229	0.259	-0.885	0.376	1
IDH1	Cancer of Unknown Primary	factor(sample_all$sex)Unknown	-12.745	3956.18	-0.003	0.997	1
IDH1	Cancer of Unknown Primary	factor(sample_status)1	-0.381	0.278	-1.369	0.171	1
IDH1	Esophagogastric Cancer	factor(aya_status)1	-16.43	2381.32	-0.007	0.994	1
IDH1	Esophagogastric Cancer	factor(sample_subtypes)Diffuse Type Stomach Adenocarcinoma	-16.406	5453.52	-0.003	0.998	1
IDH1	Esophagogastric Cancer	factor(sample_subtypes)Esophageal Adenocarcinoma	0.685	0.786	0.871	0.384	1
IDH1	Esophagogastric Cancer	factor(sample_subtypes)Esophageal Poorly Differentiated Carcinoma	-16.274	4152.61	-0.004	0.997	1
IDH1	Esophagogastric Cancer	factor(sample_subtypes)Esophageal Squamous Cell Carcinoma	-16.509	2417.89	-0.007	0.995	1
IDH1	Esophagogastric Cancer	factor(sample_subtypes)Esophagogastric Adenocarcinoma	-0.234	1.229	-0.19	0.849	1
IDH1	Esophagogastric Cancer	factor(sample_subtypes)Intestinal Type Stomach Adenocarcinoma	-16.385	5356.69	-0.003	0.998	1
IDH1	Esophagogastric Cancer	factor(sample_subtypes)others	-16.19	5856.37	-0.003	0.998	1
IDH1	Esophagogastric Cancer	factor(sample_subtypes)Poorly Differentiated Carcinoma of the Stomach	-16.365	2987.36	-0.005	0.996	1
IDH1	Esophagogastric Cancer	factor(sample_subtypes)Signet Ring Cell Carcinoma of the Stomach	-16.312	3277.8	-0.005	0.996	1
IDH1	Esophagogastric Cancer	factor(sample_subtypes)Stomach Adenocarcinoma	0.352	0.855	0.412	0.68	1
IDH1	Esophagogastric Cancer	factor(sample_subtypes)Tubular Stomach Adenocarcinoma	-16.509	7083.29	-0.002	0.998	1
IDH1	Esophagogastric Cancer	factor(sample_all$sex)Male	-0.314	0.559	-0.562	0.574	1
IDH1	Esophagogastric Cancer	factor(sample_status)1	-0.398	0.642	-0.62	0.535	1
IDH1	Hepatobiliary Cancer	factor(aya_status)1	-0.495	0.452	-1.094	0.274	1
IDH1	Hepatobiliary Cancer	factor(sample_subtypes)Extrahepatic Cholangiocarcinoma	-1.768	0.615	-2.876	0.00403	0.225
IDH1	Hepatobiliary Cancer	factor(sample_subtypes)Fibrolamellar Carcinoma	-15.113	614.66	-0.025	0.98	1
IDH1	Hepatobiliary Cancer	factor(sample_subtypes)Gallbladder Adenocarcinoma, NOS	-2.259	1.027	-2.199	0.0279	0.692
IDH1	Hepatobiliary Cancer	factor(sample_subtypes)Gallbladder Cancer	-3.288	1.023	-3.214	0.00131	0.104
IDH1	Hepatobiliary Cancer	factor(sample_subtypes)Hepatoblastoma	-15.378	708.78	-0.022	0.983	1
IDH1	Hepatobiliary Cancer	factor(sample_subtypes)Hepatocellular Carcinoma	-2.543	0.613	-4.148	3.35e-05	0.00649
IDH1	Hepatobiliary Cancer	factor(sample_subtypes)Hepatocellular Carcinoma plus Intrahepatic Cholangiocarcinoma	-1.025	0.75	-1.367	0.172	1
IDH1	Hepatobiliary Cancer	factor(sample_subtypes)Intrahepatic Cholangiocarcinoma	0.907	0.22	4.123	3.74e-05	0.00713
IDH1	Hepatobiliary Cancer	factor(sample_subtypes)others	-0.611	1.053	-0.581	0.562	1
IDH1	Hepatobiliary Cancer	factor(sample_subtypes)Perihilar Cholangiocarcinoma	-0.827	1.046	-0.79	0.429	1
IDH1	Hepatobiliary Cancer	factor(sample_all$sex)Male	-0.41	0.175	-2.341	0.0192	0.57
IDH1	Hepatobiliary Cancer	factor(sample_status)1	-0.114	0.204	-0.556	0.578	1
IDH1	Pancreatic Cancer	factor(aya_status)1	0.448	1.071	0.418	0.676	1
IDH1	Pancreatic Cancer	factor(sample_subtypes)Adenosquamous Carcinoma of the Pancreas	-16.028	1437	-0.011	0.991	1
IDH1	Pancreatic Cancer	factor(sample_subtypes)Intraductal Papillary Mucinous Neoplasm	-15.807	2289.07	-0.007	0.994	1
IDH1	Pancreatic Cancer	factor(sample_subtypes)others	1.247	1.342	0.929	0.353	1
IDH1	Pancreatic Cancer	factor(sample_subtypes)Pancreatic Adenocarcinoma	-2.275	0.798	-2.85	0.00438	0.236
IDH1	Pancreatic Cancer	factor(sample_subtypes)Pancreatic Neuroendocrine Tumor	-1.573	0.941	-1.672	0.0945	1
IDH1	Pancreatic Cancer	factor(sample_subtypes)Solid Pseudopapillary Neoplasm of the Pancreas	-16.062	2435.71	-0.007	0.995	1
IDH1	Pancreatic Cancer	factor(sample_subtypes)Undifferentiated Carcinoma of the Pancreas	-16.089	1856.66	-0.009	0.993	1
IDH1	Pancreatic Cancer	factor(sample_all$sex)Male	0.338	0.532	0.635	0.525	1
IDH1	Pancreatic Cancer	factor(sample_status)1	0.71	0.532	1.336	0.182	1
IDH1	Head and Neck Cancer	factor(aya_status)1	0.881	1.216	0.724	0.469	1
IDH1	Head and Neck Cancer	factor(sample_subtypes)Head and Neck Neuroendocrine Carcinoma	-0.077	9383.42	0	1	1
IDH1	Head and Neck Cancer	factor(sample_subtypes)Head and Neck Squamous Cell Carcinoma	16.494	5984.19	0.003	0.998	1
IDH1	Head and Neck Cancer	factor(sample_subtypes)Head and Neck Squamous Cell Carcinoma of Unknown Primary	18.651	5984.19	0.003	0.998	1
IDH1	Head and Neck Cancer	factor(sample_subtypes)Hypopharynx Squamous Cell Carcinoma	0.119	9227.58	0	1	1
IDH1	Head and Neck Cancer	factor(sample_subtypes)Larynx Squamous Cell Carcinoma	0.171	6910.58	0	1	1
IDH1	Head and Neck Cancer	factor(sample_subtypes)Nasopharyngeal Carcinoma	-0.062	7217.99	0	1	1
IDH1	Head and Neck Cancer	factor(sample_subtypes)Oral Cavity Squamous Cell Carcinoma	15.63	5984.19	0.003	0.998	1
IDH1	Head and Neck Cancer	factor(sample_subtypes)Oropharynx Squamous Cell Carcinoma	16.859	5984.19	0.003	0.998	1
IDH1	Head and Neck Cancer	factor(sample_subtypes)others	17.324	5984.19	0.003	0.998	1
IDH1	Head and Neck Cancer	factor(sample_subtypes)Sinonasal Squamous Cell Carcinoma	0.002	7923.8	0	1	1
IDH1	Head and Neck Cancer	factor(sample_all$sex)Male	-0.875	0.815	-1.074	0.283	1
IDH1	Head and Neck Cancer	factor(sample_status)1	0.039	0.834	0.047	0.962	1
IDH1	Endometrial Cancer	factor(aya_status)1	0.037	0.733	0.051	0.959	1
IDH1	Endometrial Cancer	factor(sample_subtypes)others	-0.024	1.071	-0.022	0.982	1
IDH1	Endometrial Cancer	factor(sample_subtypes)Uterine Carcinosarcoma/Uterine Malignant Mixed Mullerian Tumor	-2.252	1.057	-2.13	0.0332	0.752
IDH1	Endometrial Cancer	factor(sample_subtypes)Uterine Clear Cell Carcinoma	0.453	0.613	0.739	0.46	1
IDH1	Endometrial Cancer	factor(sample_subtypes)Uterine Dedifferentiated Carcinoma	-13.056	536.481	-0.024	0.981	1
IDH1	Endometrial Cancer	factor(sample_subtypes)Uterine Endometrioid Carcinoma	0.093	0.372	0.249	0.803	1
IDH1	Endometrial Cancer	factor(sample_subtypes)Uterine Mixed Endometrial Carcinoma	0.717	0.54	1.328	0.184	1
IDH1	Endometrial Cancer	factor(sample_subtypes)Uterine Serous Carcinoma/Uterine Papillary Serous Carcinoma	-1.328	0.605	-2.194	0.0282	0.697
IDH1	Endometrial Cancer	factor(sample_subtypes)Uterine Undifferentiated Carcinoma	0.502	1.082	0.464	0.643	1
IDH1	Endometrial Cancer	factor(sample_status)1	-0.128	0.305	-0.421	0.674	1
IDH1	Leukemia	factor(aya_status)1	-0.173	0.501	-0.344	0.731	1
IDH1	Leukemia	factor(sample_subtypes)others	-16.172	1287.9	-0.013	0.99	1
IDH1	Leukemia	factor(sample_all$sex)Male	-0.201	0.322	-0.625	0.532	1
IDH1	Leukemia	factor(sample_status)1	-15.927	1696.63	-0.009	0.993	1
IDH1	Skin Cancer, Non-Melanoma	factor(aya_status)1	1.109	1.184	0.936	0.349	1
IDH1	Skin Cancer, Non-Melanoma	factor(sample_subtypes)Basal Cell Carcinoma	18.072	3117.15	0.006	0.995	1
IDH1	Skin Cancer, Non-Melanoma	factor(sample_subtypes)Cutaneous Squamous Cell Carcinoma	17.374	3117.15	0.006	0.996	1
IDH1	Skin Cancer, Non-Melanoma	factor(sample_subtypes)Dermatofibrosarcoma Protuberans	-0.167	4782.22	0	1	1
IDH1	Skin Cancer, Non-Melanoma	factor(sample_subtypes)Extramammary Paget Disease	0.492	3793.47	0	1	1
IDH1	Skin Cancer, Non-Melanoma	factor(sample_subtypes)Merkel Cell Carcinoma	15.647	3117.15	0.005	0.996	1
IDH1	Skin Cancer, Non-Melanoma	factor(sample_subtypes)others	-0.114	4812.54	0	1	1
IDH1	Skin Cancer, Non-Melanoma	factor(sample_subtypes)Sebaceous Carcinoma	18.3	3117.15	0.006	0.995	1
IDH1	Skin Cancer, Non-Melanoma	factor(sample_subtypes)Skin Adnexal Carcinoma	17.819	3117.15	0.006	0.995	1
IDH1	Skin Cancer, Non-Melanoma	factor(sample_all$sex)Male	1.619	0.775	2.088	0.0368	0.79
IDH1	Skin Cancer, Non-Melanoma	factor(sample_status)1	0.216	0.473	0.457	0.648	1
IDH1	Bladder Cancer	factor(aya_status)1	0.954	1.052	0.907	0.364	1
IDH1	Bladder Cancer	factor(sample_subtypes)Bladder Squamous Cell Carcinoma	-0.017	2752.6	0	1	1
IDH1	Bladder Cancer	factor(sample_subtypes)Bladder Urothelial Carcinoma	14.939	1381.63	0.011	0.991	1
IDH1	Bladder Cancer	factor(sample_subtypes)others	16.448	1381.63	0.012	0.991	1
IDH1	Bladder Cancer	factor(sample_subtypes)Plasmacytoid/Signet Ring Cell Bladder Carcinoma	-0.11	2928.01	0	1	1
IDH1	Bladder Cancer	factor(sample_subtypes)Small Cell Bladder Cancer	-0.104	2417	0	1	1
IDH1	Bladder Cancer	factor(sample_subtypes)Upper Tract Urothelial Carcinoma	15.03	1381.63	0.011	0.991	1
IDH1	Bladder Cancer	factor(sample_subtypes)Urethral Urothelial Carcinoma	0.001	2268.68	0	1	1
IDH1	Bladder Cancer	factor(sample_all$sex)Male	0.523	0.511	1.023	0.306	1
IDH1	Bladder Cancer	factor(sample_status)1	-0.84	0.616	-1.363	0.173	1
KIT	Glioma	factor(aya_status)1	-0.08	0.319	-0.251	0.802	1
KIT	Glioma	factor(sample_subtypes)Anaplastic Oligoastrocytoma	1.274	0.856	1.488	0.137	1
KIT	Glioma	factor(sample_subtypes)Anaplastic Oligodendroglioma	1.046	0.597	1.752	0.0798	1
KIT	Glioma	factor(sample_subtypes)Anaplastic Pleomorphic Xanthoastrocytoma	-16.245	3776.23	-0.004	0.997	1
KIT	Glioma	factor(sample_subtypes)Astrocytoma	-16.253	1034.51	-0.016	0.987	1
KIT	Glioma	factor(sample_subtypes)Diffuse Astrocytoma	-0.44	1.101	-0.399	0.69	1
KIT	Glioma	factor(sample_subtypes)Diffuse Glioma	-16.234	1441.17	-0.011	0.991	1
KIT	Glioma	factor(sample_subtypes)Diffuse Intrinsic Pontine Glioma	-16.297	2326	-0.007	0.994	1
KIT	Glioma	factor(sample_subtypes)Dysembryoplastic Neuroepithelial Tumor	-16.194	4064.8	-0.004	0.997	1
KIT	Glioma	factor(sample_subtypes)Encapsulated Glioma	-16.246	3346.94	-0.005	0.996	1
KIT	Glioma	factor(sample_subtypes)Ependymoma	-0.095	1.103	-0.086	0.931	1
KIT	Glioma	factor(sample_subtypes)Ganglioglioma	-16.23	1826.64	-0.009	0.993	1
KIT	Glioma	factor(sample_subtypes)Glioblastoma	0.764	0.498	1.534	0.125	1
KIT	Glioma	factor(sample_subtypes)Glioblastoma Multiforme	0.343	0.492	0.697	0.486	1
KIT	Glioma	factor(sample_subtypes)Glioma, NOS	-16.237	1704.34	-0.01	0.992	1
KIT	Glioma	factor(sample_subtypes)Gliosarcoma	0.297	1.11	0.268	0.789	1
KIT	Glioma	factor(sample_subtypes)High-Grade Glioma, NOS	0.265	0.678	0.39	0.696	1
KIT	Glioma	factor(sample_subtypes)Low-Grade Glioma, NOS	-0.081	0.843	-0.096	0.924	1
KIT	Glioma	factor(sample_subtypes)Oligoastrocytoma	1.15	1.118	1.028	0.304	1
KIT	Glioma	factor(sample_subtypes)Oligodendroglioma	-0.591	0.842	-0.702	0.483	1
KIT	Glioma	factor(sample_subtypes)others	-16.241	3864.88	-0.004	0.997	1
KIT	Glioma	factor(sample_subtypes)Pilocytic Astrocytoma	-16.27	1231.12	-0.013	0.989	1
KIT	Glioma	factor(sample_subtypes)Pilomyxoid Astrocytoma	-16.358	4427.28	-0.004	0.997	1
KIT	Glioma	factor(sample_subtypes)Pleomorphic Xanthoastrocytoma	-16.281	3613.99	-0.005	0.996	1
KIT	Glioma	factor(sample_all$sex)Male	-0.249	0.218	-1.144	0.253	1
KIT	Glioma	factor(sample_status)1	0.207	0.346	0.598	0.55	1
KIT	Breast Cancer	factor(aya_status)1	0.045	0.339	0.133	0.894	1
KIT	Breast Cancer	factor(sample_subtypes)Breast Invasive Cancer, NOS	15.248	1659.21	0.009	0.993	1
KIT	Breast Cancer	factor(sample_subtypes)Breast Invasive Carcinoma, NOS	-0.044	1748.96	0	1	1
KIT	Breast Cancer	factor(sample_subtypes)Breast Invasive Ductal Carcinoma	14.912	1659.21	0.009	0.993	1
KIT	Breast Cancer	factor(sample_subtypes)Breast Invasive Lobular Carcinoma	15.458	1659.21	0.009	0.993	1
KIT	Breast Cancer	factor(sample_subtypes)Breast Invasive Mixed Mucinous Carcinoma	-0.007	2683.3	0	1	1
KIT	Breast Cancer	factor(sample_subtypes)Breast Mixed Ductal and Lobular Carcinoma	15.424	1659.21	0.009	0.993	1
KIT	Breast Cancer	factor(sample_subtypes)Invasive Breast Carcinoma	15.433	1659.21	0.009	0.993	1
KIT	Breast Cancer	factor(sample_subtypes)Metaplastic Breast Cancer	-0.009	2306.97	0	1	1
KIT	Breast Cancer	factor(sample_subtypes)others	15.984	1659.21	0.01	0.992	1
KIT	Breast Cancer	factor(sample_all$sex)Male	0.152	1.015	0.15	0.881	1
KIT	Breast Cancer	factor(sample_status)1	0.087	0.219	0.398	0.691	1
KIT	Colorectal Cancer	factor(aya_status)1	-0.26	0.281	-0.924	0.355	1
KIT	Colorectal Cancer	factor(sample_subtypes)Colorectal Adenocarcinoma	-0.051	0.212	-0.242	0.809	1
KIT	Colorectal Cancer	factor(sample_subtypes)Mucinous Adenocarcinoma of the Colon and Rectum	0.145	0.425	0.341	0.733	1
KIT	Colorectal Cancer	factor(sample_subtypes)others	0.66	1.036	0.637	0.524	1
KIT	Colorectal Cancer	factor(sample_subtypes)Rectal Adenocarcinoma	-0.63	0.238	-2.644	0.0082	0.349
KIT	Colorectal Cancer	factor(sample_subtypes)Signet Ring Cell Adenocarcinoma of the Colon and Rectum	-12.956	391.114	-0.033	0.974	1
KIT	Colorectal Cancer	factor(sample_all$sex)Male	0.223	0.152	1.461	0.144	1
KIT	Colorectal Cancer	factor(sample_status)1	-0.653	0.188	-3.472	0.000517	0.0528
KIT	Soft Tissue Sarcoma	factor(aya_status)1	-0.915	0.782	-1.17	0.242	1
KIT	Soft Tissue Sarcoma	factor(sample_subtypes)Alveolar Soft Part Sarcoma	-17.524	5410.88	-0.003	0.997	1
KIT	Soft Tissue Sarcoma	factor(sample_subtypes)Angiosarcoma	-1.163	1.432	-0.812	0.417	1
KIT	Soft Tissue Sarcoma	factor(sample_subtypes)Clear Cell Sarcoma	-17.615	5515.76	-0.003	0.997	1
KIT	Soft Tissue Sarcoma	factor(sample_subtypes)Dedifferentiated Liposarcoma	-17.854	1853.92	-0.01	0.992	1
KIT	Soft Tissue Sarcoma	factor(sample_subtypes)Desmoid/Aggressive Fibromatosis	-0.438	1.444	-0.303	0.762	1
KIT	Soft Tissue Sarcoma	factor(sample_subtypes)Desmoplastic Small-Round-Cell Tumor	-0.102	1.463	-0.069	0.945	1
KIT	Soft Tissue Sarcoma	factor(sample_subtypes)Embryonal Rhabdomyosarcoma	-0.533	1.442	-0.37	0.712	1
KIT	Soft Tissue Sarcoma	factor(sample_subtypes)Epithelioid Hemangioendothelioma	-17.851	4460.95	-0.004	0.997	1
KIT	Soft Tissue Sarcoma	factor(sample_subtypes)Epithelioid Sarcoma	0.112	1.436	0.078	0.938	1
KIT	Soft Tissue Sarcoma	factor(sample_subtypes)Fibrosarcoma	-17.79	7475.39	-0.002	0.998	1
KIT	Soft Tissue Sarcoma	factor(sample_subtypes)Follicular Dendritic Cell Sarcoma	-17.776	7514.18	-0.002	0.998	1
KIT	Soft Tissue Sarcoma	factor(sample_subtypes)Hemangioma	-0.991	1.441	-0.687	0.492	1
KIT	Soft Tissue Sarcoma	factor(sample_subtypes)Inflammatory Myofibroblastic Tumor	-17.908	6137.09	-0.003	0.998	1
KIT	Soft Tissue Sarcoma	factor(sample_subtypes)Intimal Sarcoma	-17.807	6134.83	-0.003	0.998	1
KIT	Soft Tissue Sarcoma	factor(sample_subtypes)Leiomyosarcoma	-1.496	1.242	-1.204	0.229	1
KIT	Soft Tissue Sarcoma	factor(sample_subtypes)Liposarcoma	-17.9	5679.02	-0.003	0.997	1
KIT	Soft Tissue Sarcoma	factor(sample_subtypes)Myxofibrosarcoma	0.057	1.248	0.046	0.964	1
KIT	Soft Tissue Sarcoma	factor(sample_subtypes)Myxoid/Round-Cell Liposarcoma	-17.656	3375.76	-0.005	0.996	1
KIT	Soft Tissue Sarcoma	factor(sample_subtypes)others	-0.227	1.244	-0.182	0.855	1
KIT	Soft Tissue Sarcoma	factor(sample_subtypes)Perivascular Epithelioid Cell Tumor	-17.963	4574.68	-0.004	0.997	1
KIT	Soft Tissue Sarcoma	factor(sample_subtypes)Pleomorphic Liposarcoma	-17.842	4691.61	-0.004	0.997	1
KIT	Soft Tissue Sarcoma	factor(sample_subtypes)Radiation-Associated Sarcoma	-18.23	7076.85	-0.003	0.998	1
KIT	Soft Tissue Sarcoma	factor(sample_subtypes)Rhabdomyosarcoma	-17.696	3604.24	-0.005	0.996	1
KIT	Soft Tissue Sarcoma	factor(sample_subtypes)Round Cell Sarcoma, NOS	-17.85	4569.97	-0.004	0.997	1
KIT	Soft Tissue Sarcoma	factor(sample_subtypes)Sarcoma, NOS	-2.267	1.427	-1.588	0.112	1
KIT	Soft Tissue Sarcoma	factor(sample_subtypes)Soft Tissue Myoepithelial Carcinoma	-17.702	7230.4	-0.002	0.998	1
KIT	Soft Tissue Sarcoma	factor(sample_subtypes)Solitary Fibrous Tumor/Hemangiopericytoma	-17.925	2973.97	-0.006	0.995	1
KIT	Soft Tissue Sarcoma	factor(sample_subtypes)Synovial Sarcoma	-17.583	2436.52	-0.007	0.994	1
KIT	Soft Tissue Sarcoma	factor(sample_subtypes)Undifferentiated Pleomorphic Sarcoma/Malignant Fibrous Histiocytoma/High-Grade Spindle Cell Sarcoma	-0.2	1.115	-0.18	0.857	1
KIT	Soft Tissue Sarcoma	factor(sample_subtypes)Well-Differentiated Liposarcoma	-17.892	3188.27	-0.006	0.996	1
KIT	Soft Tissue Sarcoma	factor(sample_all$sex)Male	-0.627	0.496	-1.265	0.206	1
KIT	Soft Tissue Sarcoma	factor(sample_status)1	-0.151	0.549	-0.276	0.783	1
KIT	Germ Cell Tumor	factor(aya_status)1	-0.355	0.282	-1.262	0.207	1
KIT	Germ Cell Tumor	factor(sample_subtypes)Embryonal Carcinoma	-16.247	941.407	-0.017	0.986	1
KIT	Germ Cell Tumor	factor(sample_subtypes)Germ Cell Tumor with Somatic-Type Malignancy	-16.331	1371.51	-0.012	0.99	1
KIT	Germ Cell Tumor	factor(sample_subtypes)Immature Teratoma	-1.56	1.37	-1.139	0.255	1
KIT	Germ Cell Tumor	factor(sample_subtypes)Mature Teratoma	-16.969	1202.71	-0.014	0.989	1
KIT	Germ Cell Tumor	factor(sample_subtypes)Mixed Germ Cell Tumor	-0.958	0.808	-1.186	0.236	1
KIT	Germ Cell Tumor	factor(sample_subtypes)Non-Seminomatous Germ Cell Tumor	-0.177	0.912	-0.194	0.846	1
KIT	Germ Cell Tumor	factor(sample_subtypes)others	0.867	0.887	0.977	0.328	1
KIT	Germ Cell Tumor	factor(sample_subtypes)Seminoma	0.797	0.787	1.014	0.311	1
KIT	Germ Cell Tumor	factor(sample_subtypes)Teratoma	-16.4	1516.27	-0.011	0.991	1
KIT	Germ Cell Tumor	factor(sample_subtypes)Yolk Sac Tumor	-2.305	1.278	-1.804	0.0712	1
KIT	Germ Cell Tumor	factor(sample_all$sex)Male	-0.344	0.519	-0.662	0.508	1
KIT	Germ Cell Tumor	factor(sample_status)1	-0.712	0.333	-2.138	0.0325	0.744
KIT	Melanoma	factor(aya_status)1	-1.68	0.589	-2.853	0.00433	0.235
KIT	Melanoma	factor(sample_subtypes)Anorectal Mucosal Melanoma	1.481	0.419	3.537	0.000405	0.0437
KIT	Melanoma	factor(sample_subtypes)Cutaneous Melanoma	-0.194	0.37	-0.523	0.601	1
KIT	Melanoma	factor(sample_subtypes)Desmoplastic Melanoma	-14	565.533	-0.025	0.98	1
KIT	Melanoma	factor(sample_subtypes)Head and Neck Mucosal Melanoma	0.163	0.553	0.295	0.768	1
KIT	Melanoma	factor(sample_subtypes)Melanoma	0.014	0.372	0.037	0.971	1
KIT	Melanoma	factor(sample_subtypes)Melanoma of Unknown Primary	-0.681	0.503	-1.354	0.176	1
KIT	Melanoma	factor(sample_subtypes)Mucosal Melanoma of the Vulva/Vagina	1.135	0.467	2.43	0.0151	0.498
KIT	Melanoma	factor(sample_subtypes)Ocular Melanoma	-13.974	509.445	-0.027	0.978	1
KIT	Melanoma	factor(sample_subtypes)others	0.78	0.565	1.382	0.167	1
KIT	Melanoma	factor(sample_subtypes)Uveal Melanoma	-2.514	1.061	-2.368	0.0179	0.548
KIT	Melanoma	factor(sample_all$sex)Male	-0.07	0.163	-0.43	0.668	1
KIT	Melanoma	factor(sample_status)1	-0.019	0.163	-0.115	0.908	1
KIT	Thyroid Cancer	factor(aya_status)1	-16.593	1952.44	-0.008	0.993	1
KIT	Thyroid Cancer	factor(sample_subtypes)Follicular Thyroid Cancer	1.372	1.441	0.952	0.341	1
KIT	Thyroid Cancer	factor(sample_subtypes)Hurthle Cell Thyroid Cancer	0.791	1.432	0.552	0.581	1
KIT	Thyroid Cancer	factor(sample_subtypes)Medullary Thyroid Cancer	0.468	1.444	0.324	0.746	1
KIT	Thyroid Cancer	factor(sample_subtypes)others	-16.683	7509.68	-0.002	0.998	1
KIT	Thyroid Cancer	factor(sample_subtypes)Papillary Thyroid Cancer	-0.945	1.233	-0.767	0.443	1
KIT	Thyroid Cancer	factor(sample_subtypes)Poorly Differentiated Thyroid Cancer	-0.121	1.432	-0.084	0.933	1
KIT	Thyroid Cancer	factor(sample_all$sex)Male	-1.946	1.088	-1.789	0.0737	1
KIT	Thyroid Cancer	factor(sample_status)1	0.066	0.783	0.085	0.933	1
KIT	Non-Small Cell Lung Cancer	factor(aya_status)1	-13.624	295.017	-0.046	0.963	1
KIT	Non-Small Cell Lung Cancer	factor(sample_subtypes)Large Cell Lung Carcinoma	14.81	460.511	0.032	0.974	1
KIT	Non-Small Cell Lung Cancer	factor(sample_subtypes)Large Cell Neuroendocrine Carcinoma	14.35	460.51	0.031	0.975	1
KIT	Non-Small Cell Lung Cancer	factor(sample_subtypes)Lung Adenocarcinoma	13.614	460.51	0.03	0.976	1
KIT	Non-Small Cell Lung Cancer	factor(sample_subtypes)Lung Adenosquamous Carcinoma	13.908	460.511	0.03	0.976	1
KIT	Non-Small Cell Lung Cancer	factor(sample_subtypes)Lung Carcinoid	12.71	460.511	0.028	0.978	1
KIT	Non-Small Cell Lung Cancer	factor(sample_subtypes)Lung Neuroendocrine Tumor	13.709	460.511	0.03	0.976	1
KIT	Non-Small Cell Lung Cancer	factor(sample_subtypes)Lung Squamous Cell Carcinoma	14.031	460.51	0.03	0.976	1
KIT	Non-Small Cell Lung Cancer	factor(sample_subtypes)Non-Small Cell Lung Cancer	14.047	460.51	0.031	0.976	1
KIT	Non-Small Cell Lung Cancer	factor(sample_subtypes)others	0.122	782.725	0	1	1
KIT	Non-Small Cell Lung Cancer	factor(sample_subtypes)Pleomorphic Carcinoma of the Lung	14.249	460.511	0.031	0.975	1
KIT	Non-Small Cell Lung Cancer	factor(sample_subtypes)Poorly Differentiated Non-Small Cell Lung Cancer	14.493	460.51	0.031	0.975	1
KIT	Non-Small Cell Lung Cancer	factor(sample_subtypes)Sarcomatoid Carcinoma of the Lung	13.608	460.511	0.03	0.976	1
KIT	Non-Small Cell Lung Cancer	factor(sample_all$sex)Male	0.251	0.131	1.917	0.0553	0.939
KIT	Non-Small Cell Lung Cancer	factor(sample_status)1	-0.022	0.134	-0.163	0.871	1
KIT	Ovarian Cancer	factor(aya_status)1	0.821	0.808	1.016	0.31	1
KIT	Ovarian Cancer	factor(sample_subtypes)Endometrioid Ovarian Cancer	1.045	1.231	0.849	0.396	1
KIT	Ovarian Cancer	factor(sample_subtypes)High-Grade Serous Fallopian Tube Cancer	1.073	1.429	0.751	0.453	1
KIT	Ovarian Cancer	factor(sample_subtypes)High-Grade Serous Ovarian Cancer	1.283	1.031	1.245	0.213	1
KIT	Ovarian Cancer	factor(sample_subtypes)Low-Grade Serous Ovarian Cancer	0.573	1.243	0.461	0.645	1
KIT	Ovarian Cancer	factor(sample_subtypes)Mixed Ovarian Carcinoma	-14.303	1546.88	-0.009	0.993	1
KIT	Ovarian Cancer	factor(sample_subtypes)Mucinous Ovarian Cancer	-14.591	1310.65	-0.011	0.991	1
KIT	Ovarian Cancer	factor(sample_subtypes)others	-14.389	1832.13	-0.008	0.994	1
KIT	Ovarian Cancer	factor(sample_subtypes)Ovarian Cancer, Other	-14.274	1868.64	-0.008	0.994	1
KIT	Ovarian Cancer	factor(sample_subtypes)Ovarian Carcinosarcoma/Malignant Mixed Mesodermal Tumor	1.362	1.24	1.099	0.272	1
KIT	Ovarian Cancer	factor(sample_subtypes)Ovarian Epithelial Tumor	1.193	1.426	0.837	0.403	1
KIT	Ovarian Cancer	factor(sample_subtypes)Serous Borderline Ovarian Tumor	-14.568	1799.88	-0.008	0.994	1
KIT	Ovarian Cancer	factor(sample_subtypes)Serous Ovarian Cancer	-14.281	1062.46	-0.013	0.989	1
KIT	Ovarian Cancer	factor(sample_subtypes)Small Cell Carcinoma of the Ovary	-14.723	2221.3	-0.007	0.995	1
KIT	Ovarian Cancer	factor(sample_status)1	0.033	0.32	0.103	0.918	1
KIT	Cancer of Unknown Primary	factor(aya_status)1	0.386	0.534	0.722	0.47	1
KIT	Cancer of Unknown Primary	factor(sample_subtypes)Cancer of Unknown Primary	0.137	0.381	0.36	0.719	1
KIT	Cancer of Unknown Primary	factor(sample_subtypes)Cancer of Unknown Primary, NOS	-1.351	1.039	-1.3	0.194	1
KIT	Cancer of Unknown Primary	factor(sample_subtypes)Neuroendocrine Carcinoma, NOS	-0.198	0.646	-0.306	0.76	1
KIT	Cancer of Unknown Primary	factor(sample_subtypes)Neuroendocrine Tumor, NOS	-1.628	1.04	-1.567	0.117	1
KIT	Cancer of Unknown Primary	factor(sample_subtypes)others	-12.887	754.335	-0.017	0.986	1
KIT	Cancer of Unknown Primary	factor(sample_subtypes)Poorly Differentiated Carcinoma, NOS	0.593	0.422	1.404	0.16	1
KIT	Cancer of Unknown Primary	factor(sample_subtypes)Small Cell Carcinoma of Unknown Primary	-0.208	1.049	-0.198	0.843	1
KIT	Cancer of Unknown Primary	factor(sample_subtypes)Squamous Cell Carcinoma, NOS	0.947	0.408	2.324	0.0201	0.585
KIT	Cancer of Unknown Primary	factor(sample_subtypes)Undifferentiated Malignant Neoplasm	-0.939	1.047	-0.897	0.37	1
KIT	Cancer of Unknown Primary	factor(sample_all$sex)Male	0.582	0.28	2.077	0.0378	0.798
KIT	Cancer of Unknown Primary	factor(sample_all$sex)Unknown	-12.126	2399.55	-0.005	0.996	1
KIT	Cancer of Unknown Primary	factor(sample_status)1	-0.394	0.285	-1.385	0.166	1
KIT	Esophagogastric Cancer	factor(aya_status)1	-15.38	893.881	-0.017	0.986	1
KIT	Esophagogastric Cancer	factor(sample_subtypes)Diffuse Type Stomach Adenocarcinoma	1.383	0.832	1.662	0.0965	1
KIT	Esophagogastric Cancer	factor(sample_subtypes)Esophageal Adenocarcinoma	-0.245	0.475	-0.517	0.605	1
KIT	Esophagogastric Cancer	factor(sample_subtypes)Esophageal Poorly Differentiated Carcinoma	0.104	1.084	0.096	0.924	1
KIT	Esophagogastric Cancer	factor(sample_subtypes)Esophageal Squamous Cell Carcinoma	-1.085	1.077	-1.008	0.314	1
KIT	Esophagogastric Cancer	factor(sample_subtypes)Esophagogastric Adenocarcinoma	0.283	0.565	0.502	0.616	1
KIT	Esophagogastric Cancer	factor(sample_subtypes)Intestinal Type Stomach Adenocarcinoma	-15.605	1972.63	-0.008	0.994	1
KIT	Esophagogastric Cancer	factor(sample_subtypes)others	-15.367	2159.52	-0.007	0.994	1
KIT	Esophagogastric Cancer	factor(sample_subtypes)Poorly Differentiated Carcinoma of the Stomach	-0.506	1.081	-0.468	0.64	1
KIT	Esophagogastric Cancer	factor(sample_subtypes)Signet Ring Cell Carcinoma of the Stomach	-15.421	1207.93	-0.013	0.99	1
KIT	Esophagogastric Cancer	factor(sample_subtypes)Stomach Adenocarcinoma	-0.236	0.518	-0.456	0.648	1
KIT	Esophagogastric Cancer	factor(sample_subtypes)Tubular Stomach Adenocarcinoma	1.025	1.1	0.932	0.351	1
KIT	Esophagogastric Cancer	factor(sample_all$sex)Male	0.175	0.395	0.443	0.658	1
KIT	Esophagogastric Cancer	factor(sample_status)1	-0.208	0.402	-0.518	0.604	1
KIT	Renal Cell Carcinoma	factor(aya_status)1	-15.776	2264.32	-0.007	0.994	1
KIT	Renal Cell Carcinoma	factor(sample_subtypes)Collecting Duct Renal Cell Carcinoma	-0.103	7833.5	0	1	1
KIT	Renal Cell Carcinoma	factor(sample_subtypes)FH-Deficient Renal Cell Carcinoma	0.042	7893.76	0	1	1
KIT	Renal Cell Carcinoma	factor(sample_subtypes)others	-0.063	6341.23	0	1	1
KIT	Renal Cell Carcinoma	factor(sample_subtypes)Papillary Renal Cell Carcinoma	16.327	3180.11	0.005	0.996	1
KIT	Renal Cell Carcinoma	factor(sample_subtypes)Renal Angiomyolipoma	0.085	6616.99	0	1	1
KIT	Renal Cell Carcinoma	factor(sample_subtypes)Renal Cell Carcinoma	17.228	3180.11	0.005	0.996	1
KIT	Renal Cell Carcinoma	factor(sample_subtypes)Renal Clear Cell Carcinoma	16.276	3180.11	0.005	0.996	1
KIT	Renal Cell Carcinoma	factor(sample_subtypes)Renal Medullary Carcinoma	0.843	7471.85	0	1	1
KIT	Renal Cell Carcinoma	factor(sample_subtypes)Renal Non-Clear Cell Carcinoma	0.089	6990.91	0	1	1
KIT	Renal Cell Carcinoma	factor(sample_subtypes)Renal Oncocytoma	17.759	3180.11	0.006	0.996	1
KIT	Renal Cell Carcinoma	factor(sample_subtypes)Sarcomatoid Renal Cell Carcinoma	-0.232	6947.33	0	1	1
KIT	Renal Cell Carcinoma	factor(sample_subtypes)Translocation-Associated Renal Cell Carcinoma	0.278	5615	0	1	1
KIT	Renal Cell Carcinoma	factor(sample_subtypes)Unclassified Renal Cell Carcinoma	-0.001	4111.14	0	1	1
KIT	Renal Cell Carcinoma	factor(sample_all$sex)Male	0.408	0.789	0.517	0.605	1
KIT	Renal Cell Carcinoma	factor(sample_status)1	0.091	0.655	0.138	0.89	1
KIT	Hepatobiliary Cancer	factor(aya_status)1	-0.94	1.247	-0.754	0.451	1
KIT	Hepatobiliary Cancer	factor(sample_subtypes)Extrahepatic Cholangiocarcinoma	-1.534	1.066	-1.438	0.15	1
KIT	Hepatobiliary Cancer	factor(sample_subtypes)Fibrolamellar Carcinoma	0.471	1.283	0.367	0.714	1
KIT	Hepatobiliary Cancer	factor(sample_subtypes)Gallbladder Adenocarcinoma, NOS	-0.666	1.08	-0.617	0.538	1
KIT	Hepatobiliary Cancer	factor(sample_subtypes)Gallbladder Cancer	-0.181	0.599	-0.303	0.762	1
KIT	Hepatobiliary Cancer	factor(sample_subtypes)Hepatoblastoma	-15.948	1917.65	-0.008	0.993	1
KIT	Hepatobiliary Cancer	factor(sample_subtypes)Hepatocellular Carcinoma	-0.294	0.535	-0.549	0.583	1
KIT	Hepatobiliary Cancer	factor(sample_subtypes)Hepatocellular Carcinoma plus Intrahepatic Cholangiocarcinoma	-15.908	1570.13	-0.01	0.992	1
KIT	Hepatobiliary Cancer	factor(sample_subtypes)Intrahepatic Cholangiocarcinoma	-2.66	1.065	-2.498	0.0125	0.449
KIT	Hepatobiliary Cancer	factor(sample_subtypes)others	-15.865	2656.77	-0.006	0.995	1
KIT	Hepatobiliary Cancer	factor(sample_subtypes)Perihilar Cholangiocarcinoma	-15.986	2372.8	-0.007	0.995	1
KIT	Hepatobiliary Cancer	factor(sample_all$sex)Male	0.401	0.456	0.881	0.378	1
KIT	Hepatobiliary Cancer	factor(sample_status)1	0.684	0.431	1.59	0.112	1
KIT	Pancreatic Cancer	factor(aya_status)1	-15.161	1013.39	-0.015	0.988	1
KIT	Pancreatic Cancer	factor(sample_subtypes)Adenosquamous Carcinoma of the Pancreas	-15.474	1445.03	-0.011	0.991	1
KIT	Pancreatic Cancer	factor(sample_subtypes)Intraductal Papillary Mucinous Neoplasm	-15.335	2292.59	-0.007	0.995	1
KIT	Pancreatic Cancer	factor(sample_subtypes)others	-15.22	2840.39	-0.005	0.996	1
KIT	Pancreatic Cancer	factor(sample_subtypes)Pancreatic Adenocarcinoma	-0.969	1.04	-0.932	0.351	1
KIT	Pancreatic Cancer	factor(sample_subtypes)Pancreatic Neuroendocrine Tumor	0.053	1.084	0.049	0.961	1
KIT	Pancreatic Cancer	factor(sample_subtypes)Solid Pseudopapillary Neoplasm of the Pancreas	-15.275	2392.09	-0.006	0.995	1
KIT	Pancreatic Cancer	factor(sample_subtypes)Undifferentiated Carcinoma of the Pancreas	-15.484	1855.51	-0.008	0.993	1
KIT	Pancreatic Cancer	factor(sample_all$sex)Male	0.072	0.385	0.188	0.851	1
KIT	Pancreatic Cancer	factor(sample_status)1	0.522	0.382	1.368	0.171	1
KIT	Mature B-Cell Neoplasms	factor(aya_status)1	1.338	0.719	1.862	0.0626	0.99
KIT	Mature B-Cell Neoplasms	factor(sample_subtypes)Diffuse Large B-Cell Lymphoma, NOS	0.554	0.737	0.751	0.453	1
KIT	Mature B-Cell Neoplasms	factor(sample_subtypes)Follicular Lymphoma	-0.457	1.171	-0.39	0.697	1
KIT	Mature B-Cell Neoplasms	factor(sample_subtypes)Mantle Cell Lymphoma	-16.194	3043.35	-0.005	0.996	1
KIT	Mature B-Cell Neoplasms	factor(sample_subtypes)Marginal Zone Lymphoma	-16.091	4012	-0.004	0.997	1
KIT	Mature B-Cell Neoplasms	factor(sample_subtypes)Mature B-Cell Neoplasms	-16.24	1906.04	-0.009	0.993	1
KIT	Mature B-Cell Neoplasms	factor(sample_subtypes)others	-16.363	2230.75	-0.007	0.994	1
KIT	Mature B-Cell Neoplasms	factor(sample_subtypes)Plasma Cell Myeloma	-0.497	1.162	-0.428	0.669	1
KIT	Mature B-Cell Neoplasms	factor(sample_all$sex)Male	1.279	0.783	1.634	0.102	1
KIT	Mature B-Cell Neoplasms	factor(sample_status)1	0.28	1.098	0.255	0.798	1
KIT	Head and Neck Cancer	factor(aya_status)1	-16.215	1255.45	-0.013	0.99	1
KIT	Head and Neck Cancer	factor(sample_subtypes)Head and Neck Neuroendocrine Carcinoma	16.778	2200.31	0.008	0.994	1
KIT	Head and Neck Cancer	factor(sample_subtypes)Head and Neck Squamous Cell Carcinoma	15.686	2200.31	0.007	0.994	1
KIT	Head and Neck Cancer	factor(sample_subtypes)Head and Neck Squamous Cell Carcinoma of Unknown Primary	16.151	2200.31	0.007	0.994	1
KIT	Head and Neck Cancer	factor(sample_subtypes)Hypopharynx Squamous Cell Carcinoma	16.733	2200.31	0.008	0.994	1
KIT	Head and Neck Cancer	factor(sample_subtypes)Larynx Squamous Cell Carcinoma	16.029	2200.31	0.007	0.994	1
KIT	Head and Neck Cancer	factor(sample_subtypes)Nasopharyngeal Carcinoma	16.284	2200.31	0.007	0.994	1
KIT	Head and Neck Cancer	factor(sample_subtypes)Oral Cavity Squamous Cell Carcinoma	15.582	2200.31	0.007	0.994	1
KIT	Head and Neck Cancer	factor(sample_subtypes)Oropharynx Squamous Cell Carcinoma	15.396	2200.31	0.007	0.994	1
KIT	Head and Neck Cancer	factor(sample_subtypes)others	17.075	2200.31	0.008	0.994	1
KIT	Head and Neck Cancer	factor(sample_subtypes)Sinonasal Squamous Cell Carcinoma	16.09	2200.31	0.007	0.994	1
KIT	Head and Neck Cancer	factor(sample_all$sex)Male	-0.323	0.425	-0.761	0.447	1
KIT	Head and Neck Cancer	factor(sample_status)1	0.488	0.398	1.225	0.22	1
KIT	Gastrointestinal Stromal Tumor	factor(aya_status)1	-1.255	0.267	-4.702	2.58e-06	0.000784
KIT	Gastrointestinal Stromal Tumor	factor(sample_all$sex)Male	0.318	0.165	1.928	0.0539	0.929
KIT	Gastrointestinal Stromal Tumor	factor(sample_status)1	0.463	0.182	2.536	0.0112	0.421
KIT	Endometrial Cancer	factor(aya_status)1	-0.276	0.603	-0.457	0.647	1
KIT	Endometrial Cancer	factor(sample_subtypes)others	0.069	0.771	0.089	0.929	1
KIT	Endometrial Cancer	factor(sample_subtypes)Uterine Carcinosarcoma/Uterine Malignant Mixed Mullerian Tumor	-2.232	0.752	-2.968	0.00299	0.185
KIT	Endometrial Cancer	factor(sample_subtypes)Uterine Clear Cell Carcinoma	-0.923	0.758	-1.218	0.223	1
KIT	Endometrial Cancer	factor(sample_subtypes)Uterine Dedifferentiated Carcinoma	1.079	0.676	1.596	0.111	1
KIT	Endometrial Cancer	factor(sample_subtypes)Uterine Endometrioid Carcinoma	0.115	0.274	0.421	0.674	1
KIT	Endometrial Cancer	factor(sample_subtypes)Uterine Mixed Endometrial Carcinoma	-0.157	0.522	-0.3	0.764	1
KIT	Endometrial Cancer	factor(sample_subtypes)Uterine Serous Carcinoma/Uterine Papillary Serous Carcinoma	-16.72	472.028	-0.035	0.972	1
KIT	Endometrial Cancer	factor(sample_subtypes)Uterine Undifferentiated Carcinoma	0.975	0.674	1.446	0.148	1
KIT	Endometrial Cancer	factor(sample_status)1	-0.519	0.269	-1.931	0.0535	0.927
KIT	Leukemia	factor(aya_status)1	-0.145	1.085	-0.134	0.894	1
KIT	Leukemia	factor(sample_subtypes)others	-15.463	2110.51	-0.007	0.994	1
KIT	Leukemia	factor(sample_all$sex)Male	-0.889	0.74	-1.202	0.229	1
KIT	Leukemia	factor(sample_status)1	-15.155	2789.82	-0.005	0.996	1
KIT	Skin Cancer, Non-Melanoma	factor(aya_status)1	-0.135	1.108	-0.122	0.903	1
KIT	Skin Cancer, Non-Melanoma	factor(sample_subtypes)Basal Cell Carcinoma	17.537	1990.22	0.009	0.993	1
KIT	Skin Cancer, Non-Melanoma	factor(sample_subtypes)Cutaneous Squamous Cell Carcinoma	17.422	1990.22	0.009	0.993	1
KIT	Skin Cancer, Non-Melanoma	factor(sample_subtypes)Dermatofibrosarcoma Protuberans	16.428	1990.22	0.008	0.993	1
KIT	Skin Cancer, Non-Melanoma	factor(sample_subtypes)Extramammary Paget Disease	-0.045	2405.26	0	1	1
KIT	Skin Cancer, Non-Melanoma	factor(sample_subtypes)Merkel Cell Carcinoma	15.382	1990.22	0.008	0.994	1
KIT	Skin Cancer, Non-Melanoma	factor(sample_subtypes)others	-0.237	3029.05	0	1	1
KIT	Skin Cancer, Non-Melanoma	factor(sample_subtypes)Sebaceous Carcinoma	-0.184	2923.27	0	1	1
KIT	Skin Cancer, Non-Melanoma	factor(sample_subtypes)Skin Adnexal Carcinoma	17.142	1990.22	0.009	0.993	1
KIT	Skin Cancer, Non-Melanoma	factor(sample_all$sex)Male	0.442	0.39	1.133	0.257	1
KIT	Skin Cancer, Non-Melanoma	factor(sample_status)1	0.155	0.32	0.484	0.628	1
KIT	Bladder Cancer	factor(aya_status)1	0.316	1.031	0.307	0.759	1
KIT	Bladder Cancer	factor(sample_subtypes)Bladder Squamous Cell Carcinoma	-0.082	2769.39	0	1	1
KIT	Bladder Cancer	factor(sample_subtypes)Bladder Urothelial Carcinoma	16.112	1392.03	0.012	0.991	1
KIT	Bladder Cancer	factor(sample_subtypes)others	-0.035	2101.5	0	1	1
KIT	Bladder Cancer	factor(sample_subtypes)Plasmacytoid/Signet Ring Cell Bladder Carcinoma	0.109	2946.06	0	1	1
KIT	Bladder Cancer	factor(sample_subtypes)Small Cell Bladder Cancer	0.135	2425.31	0	1	1
KIT	Bladder Cancer	factor(sample_subtypes)Upper Tract Urothelial Carcinoma	16.025	1392.03	0.012	0.991	1
KIT	Bladder Cancer	factor(sample_subtypes)Urethral Urothelial Carcinoma	0.17	2282.12	0	1	1
KIT	Bladder Cancer	factor(sample_all$sex)Male	-0.575	0.28	-2.055	0.0399	0.816
KIT	Bladder Cancer	factor(sample_status)1	-0.163	0.34	-0.481	0.63	1
KIT	Mature T and NK Neoplasms	factor(aya_status)1	-17.268	3247.41	-0.005	0.996	1
KIT	Mature T and NK Neoplasms	factor(sample_subtypes)Mature T and NK Neoplasms	17.734	2928.07	0.006	0.995	1
KIT	Mature T and NK Neoplasms	factor(sample_subtypes)Mycosis Fungoides	17.519	2928.07	0.006	0.995	1
KIT	Mature T and NK Neoplasms	factor(sample_subtypes)others	17.58	2928.07	0.006	0.995	1
KIT	Mature T and NK Neoplasms	factor(sample_subtypes)Peripheral T-Cell lymphoma, NOS	-0.046	3945.62	0	1	1
KIT	Mature T and NK Neoplasms	factor(sample_all$sex)Male	1.53	1.103	1.387	0.165	1
KIT	Mature T and NK Neoplasms	factor(sample_status)1	-17.924	6860.22	-0.003	0.998	1
KRAS	Glioma	factor(aya_status)1	0.452	0.266	1.697	0.0896	1
KRAS	Glioma	factor(sample_subtypes)Anaplastic Oligoastrocytoma	0.825	1.133	0.728	0.466	1
KRAS	Glioma	factor(sample_subtypes)Anaplastic Oligodendroglioma	1.633	0.612	2.666	0.00767	0.335
KRAS	Glioma	factor(sample_subtypes)Anaplastic Pleomorphic Xanthoastrocytoma	-15.144	2277.31	-0.007	0.995	1
KRAS	Glioma	factor(sample_subtypes)Astrocytoma	-0.015	0.768	-0.02	0.984	1
KRAS	Glioma	factor(sample_subtypes)Diffuse Astrocytoma	0.399	0.874	0.457	0.648	1
KRAS	Glioma	factor(sample_subtypes)Diffuse Glioma	0.208	0.872	0.238	0.812	1
KRAS	Glioma	factor(sample_subtypes)Diffuse Intrinsic Pontine Glioma	-14.959	1405.91	-0.011	0.992	1
KRAS	Glioma	factor(sample_subtypes)Dysembryoplastic Neuroepithelial Tumor	-14.821	2453.78	-0.006	0.995	1
KRAS	Glioma	factor(sample_subtypes)Encapsulated Glioma	-14.979	2022.19	-0.007	0.994	1
KRAS	Glioma	factor(sample_subtypes)Ependymoma	-14.929	1156.87	-0.013	0.99	1
KRAS	Glioma	factor(sample_subtypes)Ganglioglioma	0.76	0.876	0.868	0.386	1
KRAS	Glioma	factor(sample_subtypes)Glioblastoma	0.593	0.571	1.038	0.299	1
KRAS	Glioma	factor(sample_subtypes)Glioblastoma Multiforme	-0.138	0.578	-0.238	0.812	1
KRAS	Glioma	factor(sample_subtypes)Glioma, NOS	-0.137	1.124	-0.121	0.903	1
KRAS	Glioma	factor(sample_subtypes)Gliosarcoma	-14.915	1442.04	-0.01	0.992	1
KRAS	Glioma	factor(sample_subtypes)High-Grade Glioma, NOS	0.587	0.715	0.821	0.412	1
KRAS	Glioma	factor(sample_subtypes)Low-Grade Glioma, NOS	1.319	0.655	2.014	0.0441	0.853
KRAS	Glioma	factor(sample_subtypes)Oligoastrocytoma	2.063	0.898	2.297	0.0216	0.608
KRAS	Glioma	factor(sample_subtypes)Oligodendroglioma	0.794	0.652	1.217	0.224	1
KRAS	Glioma	factor(sample_subtypes)others	-14.933	2335.33	-0.006	0.995	1
KRAS	Glioma	factor(sample_subtypes)Pilocytic Astrocytoma	1.082	0.657	1.646	0.0997	1
KRAS	Glioma	factor(sample_subtypes)Pilomyxoid Astrocytoma	-15.001	2677.48	-0.006	0.996	1
KRAS	Glioma	factor(sample_subtypes)Pleomorphic Xanthoastrocytoma	-15.023	2181.54	-0.007	0.995	1
KRAS	Glioma	factor(sample_all$sex)Male	-0.504	0.232	-2.172	0.0299	0.717
KRAS	Glioma	factor(sample_status)1	-0.256	0.437	-0.585	0.559	1
KRAS	Breast Cancer	factor(aya_status)1	-0.576	0.465	-1.238	0.216	1
KRAS	Breast Cancer	factor(sample_subtypes)Breast Invasive Cancer, NOS	14.153	1003.39	0.014	0.989	1
KRAS	Breast Cancer	factor(sample_subtypes)Breast Invasive Carcinoma, NOS	14.442	1003.39	0.014	0.989	1
KRAS	Breast Cancer	factor(sample_subtypes)Breast Invasive Ductal Carcinoma	13.894	1003.39	0.014	0.989	1
KRAS	Breast Cancer	factor(sample_subtypes)Breast Invasive Lobular Carcinoma	13.568	1003.39	0.014	0.989	1
KRAS	Breast Cancer	factor(sample_subtypes)Breast Invasive Mixed Mucinous Carcinoma	0.157	1618.64	0	1	1
KRAS	Breast Cancer	factor(sample_subtypes)Breast Mixed Ductal and Lobular Carcinoma	13.047	1003.39	0.013	0.99	1
KRAS	Breast Cancer	factor(sample_subtypes)Invasive Breast Carcinoma	13.818	1003.39	0.014	0.989	1
KRAS	Breast Cancer	factor(sample_subtypes)Metaplastic Breast Cancer	0.072	1392.98	0	1	1
KRAS	Breast Cancer	factor(sample_subtypes)others	14.296	1003.39	0.014	0.989	1
KRAS	Breast Cancer	factor(sample_all$sex)Male	0.284	1.015	0.28	0.78	1
KRAS	Breast Cancer	factor(sample_status)1	0.465	0.246	1.887	0.0591	0.966
KRAS	Colorectal Cancer	factor(aya_status)1	-0.039	0.08	-0.484	0.628	1
KRAS	Colorectal Cancer	factor(sample_subtypes)Colorectal Adenocarcinoma	-0.061	0.069	-0.885	0.376	1
KRAS	Colorectal Cancer	factor(sample_subtypes)Mucinous Adenocarcinoma of the Colon and Rectum	0.283	0.146	1.937	0.0528	0.922
KRAS	Colorectal Cancer	factor(sample_subtypes)others	-1.307	0.638	-2.049	0.0405	0.82
KRAS	Colorectal Cancer	factor(sample_subtypes)Rectal Adenocarcinoma	-0.019	0.062	-0.308	0.758	1
KRAS	Colorectal Cancer	factor(sample_subtypes)Signet Ring Cell Adenocarcinoma of the Colon and Rectum	-1.209	0.421	-2.868	0.00413	0.228
KRAS	Colorectal Cancer	factor(sample_all$sex)Male	-0.255	0.047	-5.413	6.2e-08	3.29e-05
KRAS	Colorectal Cancer	factor(sample_status)1	0.027	0.051	0.53	0.596	1
KRAS	Soft Tissue Sarcoma	factor(aya_status)1	-0.031	0.388	-0.079	0.937	1
KRAS	Soft Tissue Sarcoma	factor(sample_subtypes)Alveolar Soft Part Sarcoma	0.037	4264.99	0	1	1
KRAS	Soft Tissue Sarcoma	factor(sample_subtypes)Angiosarcoma	17.127	2641.64	0.006	0.995	1
KRAS	Soft Tissue Sarcoma	factor(sample_subtypes)Clear Cell Sarcoma	0.024	4313.48	0	1	1
KRAS	Soft Tissue Sarcoma	factor(sample_subtypes)Dedifferentiated Liposarcoma	-0.036	2874.03	0	1	1
KRAS	Soft Tissue Sarcoma	factor(sample_subtypes)Desmoid/Aggressive Fibromatosis	-0.058	3405.8	0	1	1
KRAS	Soft Tissue Sarcoma	factor(sample_subtypes)Desmoplastic Small-Round-Cell Tumor	-0.009	3280.5	0	1	1
KRAS	Soft Tissue Sarcoma	factor(sample_subtypes)Embryonal Rhabdomyosarcoma	17.007	2641.64	0.006	0.995	1
KRAS	Soft Tissue Sarcoma	factor(sample_subtypes)Epithelioid Hemangioendothelioma	-0.048	3802.43	0	1	1
KRAS	Soft Tissue Sarcoma	factor(sample_subtypes)Epithelioid Sarcoma	0.005	3825.85	0	1	1
KRAS	Soft Tissue Sarcoma	factor(sample_subtypes)Fibrosarcoma	17.918	2641.64	0.007	0.995	1
KRAS	Soft Tissue Sarcoma	factor(sample_subtypes)Follicular Dendritic Cell Sarcoma	17.875	2641.64	0.007	0.995	1
KRAS	Soft Tissue Sarcoma	factor(sample_subtypes)Hemangioma	17.195	2641.64	0.007	0.995	1
KRAS	Soft Tissue Sarcoma	factor(sample_subtypes)Inflammatory Myofibroblastic Tumor	18.242	2641.64	0.007	0.994	1
KRAS	Soft Tissue Sarcoma	factor(sample_subtypes)Intimal Sarcoma	-0.028	4610.4	0	1	1
KRAS	Soft Tissue Sarcoma	factor(sample_subtypes)Leiomyosarcoma	15.919	2641.64	0.006	0.995	1
KRAS	Soft Tissue Sarcoma	factor(sample_subtypes)Liposarcoma	0.028	4365.43	0	1	1
KRAS	Soft Tissue Sarcoma	factor(sample_subtypes)Myxofibrosarcoma	-0.027	3358.55	0	1	1
KRAS	Soft Tissue Sarcoma	factor(sample_subtypes)Myxoid/Round-Cell Liposarcoma	16.264	2641.64	0.006	0.995	1
KRAS	Soft Tissue Sarcoma	factor(sample_subtypes)others	17.518	2641.64	0.007	0.995	1
KRAS	Soft Tissue Sarcoma	factor(sample_subtypes)Perivascular Epithelioid Cell Tumor	16.923	2641.64	0.006	0.995	1
KRAS	Soft Tissue Sarcoma	factor(sample_subtypes)Pleomorphic Liposarcoma	-0.012	3903.91	0	1	1
KRAS	Soft Tissue Sarcoma	factor(sample_subtypes)Radiation-Associated Sarcoma	-0.036	5046.19	0	1	1
KRAS	Soft Tissue Sarcoma	factor(sample_subtypes)Rhabdomyosarcoma	17.088	2641.64	0.006	0.995	1
KRAS	Soft Tissue Sarcoma	factor(sample_subtypes)Round Cell Sarcoma, NOS	-0.05	3851.26	0	1	1
KRAS	Soft Tissue Sarcoma	factor(sample_subtypes)Sarcoma, NOS	17.171	2641.64	0.006	0.995	1
KRAS	Soft Tissue Sarcoma	factor(sample_subtypes)Soft Tissue Myoepithelial Carcinoma	0.038	5158.04	0	1	1
KRAS	Soft Tissue Sarcoma	factor(sample_subtypes)Solitary Fibrous Tumor/Hemangiopericytoma	-0.011	3206.83	0	1	1
KRAS	Soft Tissue Sarcoma	factor(sample_subtypes)Synovial Sarcoma	15.628	2641.64	0.006	0.995	1
KRAS	Soft Tissue Sarcoma	factor(sample_subtypes)Undifferentiated Pleomorphic Sarcoma/Malignant Fibrous Histiocytoma/High-Grade Spindle Cell Sarcoma	16.828	2641.64	0.006	0.995	1
KRAS	Soft Tissue Sarcoma	factor(sample_subtypes)Well-Differentiated Liposarcoma	-0.013	3280.37	0	1	1
KRAS	Soft Tissue Sarcoma	factor(sample_all$sex)Male	0.093	0.305	0.306	0.759	1
KRAS	Soft Tissue Sarcoma	factor(sample_status)1	-0.184	0.362	-0.508	0.611	1
KRAS	Germ Cell Tumor	factor(aya_status)1	0.142	0.246	0.578	0.563	1
KRAS	Germ Cell Tumor	factor(sample_subtypes)Embryonal Carcinoma	14.684	1277.67	0.011	0.991	1
KRAS	Germ Cell Tumor	factor(sample_subtypes)Germ Cell Tumor with Somatic-Type Malignancy	17.098	1277.67	0.013	0.989	1
KRAS	Germ Cell Tumor	factor(sample_subtypes)Immature Teratoma	0.241	1825.25	0	1	1
KRAS	Germ Cell Tumor	factor(sample_subtypes)Mature Teratoma	0.242	1759.39	0	1	1
KRAS	Germ Cell Tumor	factor(sample_subtypes)Mixed Germ Cell Tumor	16.277	1277.67	0.013	0.99	1
KRAS	Germ Cell Tumor	factor(sample_subtypes)Non-Seminomatous Germ Cell Tumor	16.32	1277.67	0.013	0.99	1
KRAS	Germ Cell Tumor	factor(sample_subtypes)others	17.144	1277.67	0.013	0.989	1
KRAS	Germ Cell Tumor	factor(sample_subtypes)Seminoma	16.98	1277.67	0.013	0.989	1
KRAS	Germ Cell Tumor	factor(sample_subtypes)Teratoma	0.005	1997.23	0	1	1
KRAS	Germ Cell Tumor	factor(sample_subtypes)Yolk Sac Tumor	16.868	1277.67	0.013	0.989	1
KRAS	Germ Cell Tumor	factor(sample_all$sex)Male	0.332	0.431	0.769	0.442	1
KRAS	Germ Cell Tumor	factor(sample_status)1	-0.178	0.257	-0.693	0.488	1
KRAS	Melanoma	factor(aya_status)1	-1.048	0.724	-1.449	0.147	1
KRAS	Melanoma	factor(sample_subtypes)Anorectal Mucosal Melanoma	-0.839	0.831	-1.01	0.312	1
KRAS	Melanoma	factor(sample_subtypes)Cutaneous Melanoma	-1.204	0.489	-2.461	0.0139	0.475
KRAS	Melanoma	factor(sample_subtypes)Desmoplastic Melanoma	-16.609	2533.35	-0.007	0.995	1
KRAS	Melanoma	factor(sample_subtypes)Head and Neck Mucosal Melanoma	0.214	0.671	0.319	0.75	1
KRAS	Melanoma	factor(sample_subtypes)Melanoma	-0.106	0.453	-0.234	0.815	1
KRAS	Melanoma	factor(sample_subtypes)Melanoma of Unknown Primary	-0.791	0.623	-1.269	0.204	1
KRAS	Melanoma	factor(sample_subtypes)Mucosal Melanoma of the Vulva/Vagina	0.022	0.742	0.03	0.976	1
KRAS	Melanoma	factor(sample_subtypes)Ocular Melanoma	-16.517	2287.93	-0.007	0.994	1
KRAS	Melanoma	factor(sample_subtypes)others	-16.544	1678.23	-0.01	0.992	1
KRAS	Melanoma	factor(sample_subtypes)Uveal Melanoma	-16.487	811.372	-0.02	0.984	1
KRAS	Melanoma	factor(sample_all$sex)Male	0.21	0.26	0.807	0.42	1
KRAS	Melanoma	factor(sample_status)1	0.05	0.259	0.193	0.847	1
KRAS	Thyroid Cancer	factor(aya_status)1	-0.397	0.556	-0.713	0.476	1
KRAS	Thyroid Cancer	factor(sample_subtypes)Follicular Thyroid Cancer	1.166	0.844	1.382	0.167	1
KRAS	Thyroid Cancer	factor(sample_subtypes)Hurthle Cell Thyroid Cancer	-14.795	789.886	-0.019	0.985	1
KRAS	Thyroid Cancer	factor(sample_subtypes)Medullary Thyroid Cancer	1.305	0.703	1.857	0.0633	0.993
KRAS	Thyroid Cancer	factor(sample_subtypes)others	-14.726	1740.91	-0.008	0.993	1
KRAS	Thyroid Cancer	factor(sample_subtypes)Papillary Thyroid Cancer	-0.262	0.659	-0.397	0.691	1
KRAS	Thyroid Cancer	factor(sample_subtypes)Poorly Differentiated Thyroid Cancer	0.645	0.704	0.916	0.36	1
KRAS	Thyroid Cancer	factor(sample_all$sex)Male	0.078	0.363	0.214	0.83	1
KRAS	Thyroid Cancer	factor(sample_status)1	-0.299	0.376	-0.796	0.426	1
KRAS	Non-Small Cell Lung Cancer	factor(aya_status)1	-2.017	0.345	-5.851	4.9e-09	3.28e-06
KRAS	Non-Small Cell Lung Cancer	factor(sample_subtypes)Large Cell Lung Carcinoma	2.062	0.963	2.142	0.0322	0.742
KRAS	Non-Small Cell Lung Cancer	factor(sample_subtypes)Large Cell Neuroendocrine Carcinoma	2.187	0.748	2.924	0.00345	0.203
KRAS	Non-Small Cell Lung Cancer	factor(sample_subtypes)Lung Adenocarcinoma	2.843	0.718	3.96	7.5e-05	0.0124
KRAS	Non-Small Cell Lung Cancer	factor(sample_subtypes)Lung Adenosquamous Carcinoma	1.936	0.78	2.482	0.013	0.46
KRAS	Non-Small Cell Lung Cancer	factor(sample_subtypes)Lung Carcinoid	-0.754	1.011	-0.745	0.456	1
KRAS	Non-Small Cell Lung Cancer	factor(sample_subtypes)Lung Neuroendocrine Tumor	-0.316	1.24	-0.255	0.799	1
KRAS	Non-Small Cell Lung Cancer	factor(sample_subtypes)Lung Squamous Cell Carcinoma	0.322	0.735	0.438	0.661	1
KRAS	Non-Small Cell Lung Cancer	factor(sample_subtypes)Non-Small Cell Lung Cancer	2.722	0.724	3.762	0.000169	0.0229
KRAS	Non-Small Cell Lung Cancer	factor(sample_subtypes)others	0.637	1.022	0.623	0.534	1
KRAS	Non-Small Cell Lung Cancer	factor(sample_subtypes)Pleomorphic Carcinoma of the Lung	2.658	0.778	3.417	0.000634	0.0608
KRAS	Non-Small Cell Lung Cancer	factor(sample_subtypes)Poorly Differentiated Non-Small Cell Lung Cancer	2.629	0.739	3.559	0.000372	0.0415
KRAS	Non-Small Cell Lung Cancer	factor(sample_subtypes)Sarcomatoid Carcinoma of the Lung	2.391	0.796	3.003	0.00267	0.171
KRAS	Non-Small Cell Lung Cancer	factor(sample_all$sex)Male	-0.194	0.044	-4.449	8.61e-06	0.0021
KRAS	Non-Small Cell Lung Cancer	factor(sample_status)1	-0.351	0.044	-7.911	2.56e-15	4.26e-12
KRAS	Ovarian Cancer	factor(aya_status)1	-0.548	0.262	-2.095	0.0361	0.783
KRAS	Ovarian Cancer	factor(sample_subtypes)Endometrioid Ovarian Cancer	0.924	0.307	3.012	0.00259	0.168
KRAS	Ovarian Cancer	factor(sample_subtypes)High-Grade Serous Fallopian Tube Cancer	-1.529	0.754	-2.028	0.0426	0.84
KRAS	Ovarian Cancer	factor(sample_subtypes)High-Grade Serous Ovarian Cancer	-2.287	0.311	-7.353	1.94e-13	2.9e-10
KRAS	Ovarian Cancer	factor(sample_subtypes)Low-Grade Serous Ovarian Cancer	1.254	0.288	4.349	1.37e-05	0.00314
KRAS	Ovarian Cancer	factor(sample_subtypes)Mixed Ovarian Carcinoma	0.287	0.47	0.61	0.542	1
KRAS	Ovarian Cancer	factor(sample_subtypes)Mucinous Ovarian Cancer	3.468	0.388	8.937	3.99e-19	1.11e-15
KRAS	Ovarian Cancer	factor(sample_subtypes)others	2.466	0.421	5.863	4.55e-09	3.09e-06
KRAS	Ovarian Cancer	factor(sample_subtypes)Ovarian Cancer, Other	0.535	0.509	1.05	0.294	1
KRAS	Ovarian Cancer	factor(sample_subtypes)Ovarian Carcinosarcoma/Malignant Mixed Mesodermal Tumor	-0.5	0.435	-1.149	0.251	1
KRAS	Ovarian Cancer	factor(sample_subtypes)Ovarian Epithelial Tumor	0.128	0.468	0.273	0.785	1
KRAS	Ovarian Cancer	factor(sample_subtypes)Serous Borderline Ovarian Tumor	1.922	0.422	4.558	5.17e-06	0.00138
KRAS	Ovarian Cancer	factor(sample_subtypes)Serous Ovarian Cancer	-0.07	0.396	-0.177	0.86	1
KRAS	Ovarian Cancer	factor(sample_subtypes)Small Cell Carcinoma of the Ovary	-14.277	496.689	-0.029	0.977	1
KRAS	Ovarian Cancer	factor(sample_status)1	0.006	0.165	0.035	0.972	1
KRAS	Cancer of Unknown Primary	factor(aya_status)1	-0.919	0.314	-2.923	0.00346	0.203
KRAS	Cancer of Unknown Primary	factor(sample_subtypes)Cancer of Unknown Primary	-0.671	0.129	-5.191	2.09e-07	9.36e-05
KRAS	Cancer of Unknown Primary	factor(sample_subtypes)Cancer of Unknown Primary, NOS	-0.696	0.207	-3.363	0.00077	0.0698
KRAS	Cancer of Unknown Primary	factor(sample_subtypes)Neuroendocrine Carcinoma, NOS	-1.177	0.255	-4.617	3.9e-06	0.00109
KRAS	Cancer of Unknown Primary	factor(sample_subtypes)Neuroendocrine Tumor, NOS	-2.698	0.393	-6.858	6.98e-12	8.18e-09
KRAS	Cancer of Unknown Primary	factor(sample_subtypes)others	0.303	0.657	0.461	0.645	1
KRAS	Cancer of Unknown Primary	factor(sample_subtypes)Poorly Differentiated Carcinoma, NOS	-0.73	0.178	-4.089	4.33e-05	0.00796
KRAS	Cancer of Unknown Primary	factor(sample_subtypes)Small Cell Carcinoma of Unknown Primary	-1.778	0.528	-3.366	0.000762	0.0694
KRAS	Cancer of Unknown Primary	factor(sample_subtypes)Squamous Cell Carcinoma, NOS	-2.639	0.394	-6.692	2.2e-11	2.22e-08
KRAS	Cancer of Unknown Primary	factor(sample_subtypes)Undifferentiated Malignant Neoplasm	-3.133	0.721	-4.346	1.39e-05	0.00317
KRAS	Cancer of Unknown Primary	factor(sample_all$sex)Male	-0.155	0.106	-1.46	0.144	1
KRAS	Cancer of Unknown Primary	factor(sample_all$sex)Unknown	-7.985	324.745	-0.025	0.98	1
KRAS	Cancer of Unknown Primary	factor(sample_status)1	-0.048	0.121	-0.399	0.69	1
KRAS	Esophagogastric Cancer	factor(aya_status)1	-1.132	0.518	-2.184	0.0289	0.707
KRAS	Esophagogastric Cancer	factor(sample_subtypes)Diffuse Type Stomach Adenocarcinoma	-0.189	1.056	-0.179	0.858	1
KRAS	Esophagogastric Cancer	factor(sample_subtypes)Esophageal Adenocarcinoma	0.355	0.313	1.133	0.257	1
KRAS	Esophagogastric Cancer	factor(sample_subtypes)Esophageal Poorly Differentiated Carcinoma	-0.663	1.048	-0.633	0.527	1
KRAS	Esophagogastric Cancer	factor(sample_subtypes)Esophageal Squamous Cell Carcinoma	-1.921	1.041	-1.845	0.065	1
KRAS	Esophagogastric Cancer	factor(sample_subtypes)Esophagogastric Adenocarcinoma	0.874	0.357	2.446	0.0144	0.487
KRAS	Esophagogastric Cancer	factor(sample_subtypes)Intestinal Type Stomach Adenocarcinoma	0.973	0.671	1.45	0.147	1
KRAS	Esophagogastric Cancer	factor(sample_subtypes)others	0.129	1.063	0.121	0.904	1
KRAS	Esophagogastric Cancer	factor(sample_subtypes)Poorly Differentiated Carcinoma of the Stomach	1.313	0.41	3.202	0.00136	0.107
KRAS	Esophagogastric Cancer	factor(sample_subtypes)Signet Ring Cell Carcinoma of the Stomach	0.68	0.513	1.326	0.185	1
KRAS	Esophagogastric Cancer	factor(sample_subtypes)Stomach Adenocarcinoma	0.853	0.31	2.75	0.00595	0.285
KRAS	Esophagogastric Cancer	factor(sample_subtypes)Tubular Stomach Adenocarcinoma	1.119	0.802	1.395	0.163	1
KRAS	Esophagogastric Cancer	factor(sample_all$sex)Male	-0.344	0.177	-1.939	0.0525	0.92
KRAS	Esophagogastric Cancer	factor(sample_status)1	-0.005	0.188	-0.028	0.978	1
KRAS	Renal Cell Carcinoma	factor(aya_status)1	-0.104	1.074	-0.097	0.923	1
KRAS	Renal Cell Carcinoma	factor(sample_subtypes)Collecting Duct Renal Cell Carcinoma	-0.057	4841.09	0	1	1
KRAS	Renal Cell Carcinoma	factor(sample_subtypes)FH-Deficient Renal Cell Carcinoma	-0.105	4980.36	0	1	1
KRAS	Renal Cell Carcinoma	factor(sample_subtypes)others	-0.049	3937.29	0	1	1
KRAS	Renal Cell Carcinoma	factor(sample_subtypes)Papillary Renal Cell Carcinoma	17.133	1976.81	0.009	0.993	1
KRAS	Renal Cell Carcinoma	factor(sample_subtypes)Renal Angiomyolipoma	0.088	4115.2	0	1	1
KRAS	Renal Cell Carcinoma	factor(sample_subtypes)Renal Cell Carcinoma	16.655	1976.81	0.008	0.993	1
KRAS	Renal Cell Carcinoma	factor(sample_subtypes)Renal Clear Cell Carcinoma	14.936	1976.81	0.008	0.994	1
KRAS	Renal Cell Carcinoma	factor(sample_subtypes)Renal Medullary Carcinoma	0.039	4972.26	0	1	1
KRAS	Renal Cell Carcinoma	factor(sample_subtypes)Renal Non-Clear Cell Carcinoma	-0.112	4421.67	0	1	1
KRAS	Renal Cell Carcinoma	factor(sample_subtypes)Renal Oncocytoma	-0.162	3586.53	0	1	1
KRAS	Renal Cell Carcinoma	factor(sample_subtypes)Sarcomatoid Renal Cell Carcinoma	-0.07	4258.53	0	1	1
KRAS	Renal Cell Carcinoma	factor(sample_subtypes)Translocation-Associated Renal Cell Carcinoma	0.046	3547.86	0	1	1
KRAS	Renal Cell Carcinoma	factor(sample_subtypes)Unclassified Renal Cell Carcinoma	16.877	1976.81	0.009	0.993	1
KRAS	Renal Cell Carcinoma	factor(sample_all$sex)Male	0.428	0.662	0.646	0.518	1
KRAS	Renal Cell Carcinoma	factor(sample_status)1	-0.12	0.553	-0.216	0.829	1
KRAS	Hepatobiliary Cancer	factor(aya_status)1	-1.116	0.495	-2.253	0.0242	0.644
KRAS	Hepatobiliary Cancer	factor(sample_subtypes)Extrahepatic Cholangiocarcinoma	0.612	0.224	2.734	0.00625	0.294
KRAS	Hepatobiliary Cancer	factor(sample_subtypes)Fibrolamellar Carcinoma	-1.772	1.059	-1.673	0.0943	1
KRAS	Hepatobiliary Cancer	factor(sample_subtypes)Gallbladder Adenocarcinoma, NOS	-1.255	0.454	-2.768	0.00564	0.276
KRAS	Hepatobiliary Cancer	factor(sample_subtypes)Gallbladder Cancer	-1.363	0.303	-4.494	6.98e-06	0.00177
KRAS	Hepatobiliary Cancer	factor(sample_subtypes)Hepatoblastoma	-15.216	429.774	-0.035	0.972	1
KRAS	Hepatobiliary Cancer	factor(sample_subtypes)Hepatocellular Carcinoma	-2.886	0.474	-6.084	1.17e-09	9.34e-07
KRAS	Hepatobiliary Cancer	factor(sample_subtypes)Hepatocellular Carcinoma plus Intrahepatic Cholangiocarcinoma	-1.099	0.544	-2.019	0.0435	0.847
KRAS	Hepatobiliary Cancer	factor(sample_subtypes)Intrahepatic Cholangiocarcinoma	-0.836	0.2	-4.169	3.07e-05	0.00608
KRAS	Hepatobiliary Cancer	factor(sample_subtypes)others	-15.271	592.904	-0.026	0.979	1
KRAS	Hepatobiliary Cancer	factor(sample_subtypes)Perihilar Cholangiocarcinoma	0.659	0.496	1.329	0.184	1
KRAS	Hepatobiliary Cancer	factor(sample_all$sex)Male	-0.185	0.158	-1.173	0.241	1
KRAS	Hepatobiliary Cancer	factor(sample_status)1	0.342	0.164	2.085	0.0371	0.793
KRAS	Pancreatic Cancer	factor(aya_status)1	-1.613	0.282	-5.725	1.04e-08	6.4e-06
KRAS	Pancreatic Cancer	factor(sample_subtypes)Adenosquamous Carcinoma of the Pancreas	6.045	1.1	5.495	3.9e-08	2.15e-05
KRAS	Pancreatic Cancer	factor(sample_subtypes)Intraductal Papillary Mucinous Neoplasm	4.533	1.106	4.1	4.14e-05	0.00773
KRAS	Pancreatic Cancer	factor(sample_subtypes)others	3.105	1.176	2.639	0.00831	0.352
KRAS	Pancreatic Cancer	factor(sample_subtypes)Pancreatic Adenocarcinoma	6.115	1.013	6.039	1.55e-09	1.19e-06
KRAS	Pancreatic Cancer	factor(sample_subtypes)Pancreatic Neuroendocrine Tumor	1.089	1.035	1.052	0.293	1
KRAS	Pancreatic Cancer	factor(sample_subtypes)Solid Pseudopapillary Neoplasm of the Pancreas	-11.509	326.661	-0.035	0.972	1
KRAS	Pancreatic Cancer	factor(sample_subtypes)Undifferentiated Carcinoma of the Pancreas	5.99	1.146	5.227	1.72e-07	8.04e-05
KRAS	Pancreatic Cancer	factor(sample_all$sex)Male	-0.113	0.115	-0.981	0.327	1
KRAS	Pancreatic Cancer	factor(sample_status)1	0.168	0.12	1.397	0.162	1
KRAS	Cervical Cancer	factor(aya_status)1	-0.82	0.511	-1.605	0.108	1
KRAS	Cervical Cancer	factor(sample_subtypes)Cervical Adenosquamous Carcinoma	-0.182	0.871	-0.209	0.834	1
KRAS	Cervical Cancer	factor(sample_subtypes)Cervical Squamous Cell Carcinoma	-3.138	1.18	-2.659	0.00783	0.339
KRAS	Cervical Cancer	factor(sample_subtypes)Endocervical Adenocarcinoma	0.434	0.674	0.644	0.52	1
KRAS	Cervical Cancer	factor(sample_subtypes)Gastric Type Mucinous Carcinoma	0.957	0.736	1.301	0.193	1
KRAS	Cervical Cancer	factor(sample_subtypes)others	-0.022	0.729	-0.03	0.976	1
KRAS	Cervical Cancer	factor(sample_all$sex)Male	-13.718	1028.1	-0.013	0.989	1
KRAS	Cervical Cancer	factor(sample_status)1	0.218	0.358	0.611	0.541	1
KRAS	Mature B-Cell Neoplasms	factor(aya_status)1	-15.813	1188.1	-0.013	0.989	1
KRAS	Mature B-Cell Neoplasms	factor(sample_subtypes)Diffuse Large B-Cell Lymphoma, NOS	-1.287	0.678	-1.898	0.0577	0.958
KRAS	Mature B-Cell Neoplasms	factor(sample_subtypes)Follicular Lymphoma	-16.386	953.926	-0.017	0.986	1
KRAS	Mature B-Cell Neoplasms	factor(sample_subtypes)Mantle Cell Lymphoma	-0.379	1.069	-0.354	0.723	1
KRAS	Mature B-Cell Neoplasms	factor(sample_subtypes)Marginal Zone Lymphoma	-16.383	2510.85	-0.007	0.995	1
KRAS	Mature B-Cell Neoplasms	factor(sample_subtypes)Mature B-Cell Neoplasms	0.404	0.585	0.692	0.489	1
KRAS	Mature B-Cell Neoplasms	factor(sample_subtypes)others	-0.827	1.063	-0.778	0.437	1
KRAS	Mature B-Cell Neoplasms	factor(sample_subtypes)Plasma Cell Myeloma	1.493	0.399	3.743	0.000182	0.0243
KRAS	Mature B-Cell Neoplasms	factor(sample_all$sex)Male	-0.157	0.33	-0.474	0.636	1
KRAS	Mature B-Cell Neoplasms	factor(sample_status)1	0.745	0.679	1.098	0.272	1
KRAS	Head and Neck Cancer	factor(aya_status)1	-0.091	1.052	-0.086	0.931	1
KRAS	Head and Neck Cancer	factor(sample_subtypes)Head and Neck Neuroendocrine Carcinoma	-0.047	3496.42	0	1	1
KRAS	Head and Neck Cancer	factor(sample_subtypes)Head and Neck Squamous Cell Carcinoma	15.391	2240.26	0.007	0.995	1
KRAS	Head and Neck Cancer	factor(sample_subtypes)Head and Neck Squamous Cell Carcinoma of Unknown Primary	0.015	3104.83	0	1	1
KRAS	Head and Neck Cancer	factor(sample_subtypes)Hypopharynx Squamous Cell Carcinoma	-0.003	3436.2	0	1	1
KRAS	Head and Neck Cancer	factor(sample_subtypes)Larynx Squamous Cell Carcinoma	16.483	2240.26	0.007	0.994	1
KRAS	Head and Neck Cancer	factor(sample_subtypes)Nasopharyngeal Carcinoma	16.342	2240.26	0.007	0.994	1
KRAS	Head and Neck Cancer	factor(sample_subtypes)Oral Cavity Squamous Cell Carcinoma	15.673	2240.26	0.007	0.994	1
KRAS	Head and Neck Cancer	factor(sample_subtypes)Oropharynx Squamous Cell Carcinoma	14.751	2240.26	0.007	0.995	1
KRAS	Head and Neck Cancer	factor(sample_subtypes)others	-0.041	2733.52	0	1	1
KRAS	Head and Neck Cancer	factor(sample_subtypes)Sinonasal Squamous Cell Carcinoma	-0.028	2956.18	0	1	1
KRAS	Head and Neck Cancer	factor(sample_all$sex)Male	-0.297	0.514	-0.578	0.563	1
KRAS	Head and Neck Cancer	factor(sample_status)1	0.064	0.502	0.128	0.898	1
KRAS	Endometrial Cancer	factor(aya_status)1	-1.323	0.471	-2.812	0.00493	0.254
KRAS	Endometrial Cancer	factor(sample_subtypes)others	0.047	0.425	0.111	0.912	1
KRAS	Endometrial Cancer	factor(sample_subtypes)Uterine Carcinosarcoma/Uterine Malignant Mixed Mullerian Tumor	-0.697	0.215	-3.245	0.00117	0.0958
KRAS	Endometrial Cancer	factor(sample_subtypes)Uterine Clear Cell Carcinoma	-1.259	0.416	-3.028	0.00246	0.163
KRAS	Endometrial Cancer	factor(sample_subtypes)Uterine Dedifferentiated Carcinoma	0.67	0.491	1.364	0.172	1
KRAS	Endometrial Cancer	factor(sample_subtypes)Uterine Endometrioid Carcinoma	0.208	0.149	1.4	0.162	1
KRAS	Endometrial Cancer	factor(sample_subtypes)Uterine Mixed Endometrial Carcinoma	-0.319	0.292	-1.09	0.276	1
KRAS	Endometrial Cancer	factor(sample_subtypes)Uterine Serous Carcinoma/Uterine Papillary Serous Carcinoma	-1.624	0.237	-6.863	6.74e-12	7.98e-09
KRAS	Endometrial Cancer	factor(sample_subtypes)Uterine Undifferentiated Carcinoma	-1.713	1.035	-1.655	0.0978	1
KRAS	Endometrial Cancer	factor(sample_status)1	0.076	0.117	0.643	0.52	1
KRAS	Leukemia	factor(aya_status)1	-0.099	0.635	-0.155	0.877	1
KRAS	Leukemia	factor(sample_subtypes)others	-0.619	1.086	-0.57	0.568	1
KRAS	Leukemia	factor(sample_all$sex)Male	-0.284	0.414	-0.685	0.493	1
KRAS	Leukemia	factor(sample_status)1	1.345	0.829	1.622	0.105	1
KRAS	Appendiceal Cancer	factor(aya_status)1	0.236	0.372	0.635	0.526	1
KRAS	Appendiceal Cancer	factor(sample_subtypes)Goblet Cell Carcinoid of the Appendix	-3.653	1.027	-3.556	0.000377	0.0418
KRAS	Appendiceal Cancer	factor(sample_subtypes)Mucinous Adenocarcinoma of the Appendix	1.353	0.242	5.601	2.14e-08	1.24e-05
KRAS	Appendiceal Cancer	factor(sample_subtypes)others	0.094	0.793	0.118	0.906	1
KRAS	Appendiceal Cancer	factor(sample_subtypes)Signet Ring Cell Type of the Appendix	-0.603	0.514	-1.173	0.241	1
KRAS	Appendiceal Cancer	factor(sample_all$sex)Male	-0.11	0.227	-0.487	0.626	1
KRAS	Appendiceal Cancer	factor(sample_status)1	-0.542	0.233	-2.33	0.0198	0.58
KRAS	Skin Cancer, Non-Melanoma	factor(aya_status)1	-15.277	2764.59	-0.006	0.996	1
KRAS	Skin Cancer, Non-Melanoma	factor(sample_subtypes)Basal Cell Carcinoma	16.408	3091.18	0.005	0.996	1
KRAS	Skin Cancer, Non-Melanoma	factor(sample_subtypes)Cutaneous Squamous Cell Carcinoma	16.45	3091.18	0.005	0.996	1
KRAS	Skin Cancer, Non-Melanoma	factor(sample_subtypes)Dermatofibrosarcoma Protuberans	-0.221	4723.69	0	1	1
KRAS	Skin Cancer, Non-Melanoma	factor(sample_subtypes)Extramammary Paget Disease	15.912	3091.18	0.005	0.996	1
KRAS	Skin Cancer, Non-Melanoma	factor(sample_subtypes)Merkel Cell Carcinoma	14.906	3091.18	0.005	0.996	1
KRAS	Skin Cancer, Non-Melanoma	factor(sample_subtypes)others	-0.685	4826.27	0	1	1
KRAS	Skin Cancer, Non-Melanoma	factor(sample_subtypes)Sebaceous Carcinoma	17.426	3091.18	0.006	0.996	1
KRAS	Skin Cancer, Non-Melanoma	factor(sample_subtypes)Skin Adnexal Carcinoma	-0.451	4780.7	0	1	1
KRAS	Skin Cancer, Non-Melanoma	factor(sample_all$sex)Male	0.699	0.684	1.022	0.307	1
KRAS	Skin Cancer, Non-Melanoma	factor(sample_status)1	0.126	0.548	0.23	0.818	1
KRAS	Bladder Cancer	factor(aya_status)1	0.244	0.651	0.374	0.708	1
KRAS	Bladder Cancer	factor(sample_subtypes)Bladder Squamous Cell Carcinoma	-16.267	883.334	-0.018	0.985	1
KRAS	Bladder Cancer	factor(sample_subtypes)Bladder Urothelial Carcinoma	-1.541	0.346	-4.456	8.35e-06	0.00206
KRAS	Bladder Cancer	factor(sample_subtypes)others	0.421	0.464	0.908	0.364	1
KRAS	Bladder Cancer	factor(sample_subtypes)Plasmacytoid/Signet Ring Cell Bladder Carcinoma	-16.157	957.869	-0.017	0.987	1
KRAS	Bladder Cancer	factor(sample_subtypes)Small Cell Bladder Cancer	-16.146	732.574	-0.022	0.982	1
KRAS	Bladder Cancer	factor(sample_subtypes)Upper Tract Urothelial Carcinoma	-1.558	0.41	-3.8	0.000145	0.0206
KRAS	Bladder Cancer	factor(sample_subtypes)Urethral Urothelial Carcinoma	-2.062	1.067	-1.933	0.0533	0.926
KRAS	Bladder Cancer	factor(sample_all$sex)Male	-0.282	0.197	-1.432	0.152	1
KRAS	Bladder Cancer	factor(sample_status)1	-0.29	0.233	-1.244	0.213	1
KRAS	Gastrointestinal Neuroendocrine Tumor	factor(aya_status)1	-0.477	1.122	-0.426	0.67	1
KRAS	Gastrointestinal Neuroendocrine Tumor	factor(sample_subtypes)High-Grade Neuroendocrine Carcinoma of the Colon and Rectum	3.268	0.628	5.205	1.94e-07	8.8e-05
KRAS	Gastrointestinal Neuroendocrine Tumor	factor(sample_subtypes)others	-14.546	2461.94	-0.006	0.995	1
KRAS	Gastrointestinal Neuroendocrine Tumor	factor(sample_subtypes)Small Bowel Well-Differentiated Neuroendocrine Tumor	-0.318	0.92	-0.346	0.729	1
KRAS	Gastrointestinal Neuroendocrine Tumor	factor(sample_subtypes)Well-Differentiated Neuroendocrine Tumor of the Appendix	1.248	1.199	1.04	0.298	1
KRAS	Gastrointestinal Neuroendocrine Tumor	factor(sample_subtypes)Well-Differentiated Neuroendocrine Tumor of the Rectum	-14.577	1253.34	-0.012	0.991	1
KRAS	Gastrointestinal Neuroendocrine Tumor	factor(sample_all$sex)Male	-0.174	0.412	-0.422	0.673	1
KRAS	Gastrointestinal Neuroendocrine Tumor	factor(sample_status)1	-0.265	0.443	-0.598	0.55	1
KRAS	Uterine Sarcoma	factor(aya_status)1	-18.018	4895.98	-0.004	0.997	1
KRAS	Uterine Sarcoma	factor(sample_subtypes)Low-Grade Endometrial Stromal Sarcoma	-18.377	5808.78	-0.003	0.997	1
KRAS	Uterine Sarcoma	factor(sample_subtypes)others	-1.264	1.46	-0.866	0.386	1
KRAS	Uterine Sarcoma	factor(sample_subtypes)Uterine Adenosarcoma	0.829	1.202	0.69	0.49	1
KRAS	Uterine Sarcoma	factor(sample_subtypes)Uterine Leiomyosarcoma	-18.529	1886.61	-0.01	0.992	1
KRAS	Uterine Sarcoma	factor(sample_subtypes)Uterine Perivascular Epithelioid Cell Tumor	-18.76	6714.94	-0.003	0.998	1
KRAS	Uterine Sarcoma	factor(sample_subtypes)Uterine Sarcoma, Other	-0.014	1.29	-0.011	0.991	1
KRAS	Uterine Sarcoma	factor(sample_subtypes)Uterine Sarcoma/Mesenchymal	-18.96	7392.59	-0.003	0.998	1
KRAS	Uterine Sarcoma	factor(sample_status)1	-1.704	1.119	-1.523	0.128	1
NRAS	Glioma	factor(aya_status)1	0.174	0.395	0.442	0.659	1
NRAS	Glioma	factor(sample_subtypes)Anaplastic Oligoastrocytoma	-15.134	2711.22	-0.006	0.996	1
NRAS	Glioma	factor(sample_subtypes)Anaplastic Oligodendroglioma	1.633	0.876	1.865	0.0622	0.988
NRAS	Glioma	factor(sample_subtypes)Anaplastic Pleomorphic Xanthoastrocytoma	-15.283	3767.72	-0.004	0.997	1
NRAS	Glioma	factor(sample_subtypes)Astrocytoma	-0.357	1.228	-0.291	0.771	1
NRAS	Glioma	factor(sample_subtypes)Diffuse Astrocytoma	0.487	1.23	0.396	0.692	1
NRAS	Glioma	factor(sample_subtypes)Diffuse Glioma	-15.293	1436.87	-0.011	0.992	1
NRAS	Glioma	factor(sample_subtypes)Diffuse Intrinsic Pontine Glioma	-15.167	2320.62	-0.007	0.995	1
NRAS	Glioma	factor(sample_subtypes)Dysembryoplastic Neuroepithelial Tumor	-15.332	4057.23	-0.004	0.997	1
NRAS	Glioma	factor(sample_subtypes)Encapsulated Glioma	-15.276	3338.98	-0.005	0.996	1
NRAS	Glioma	factor(sample_subtypes)Ependymoma	-15.276	1914.72	-0.008	0.994	1
NRAS	Glioma	factor(sample_subtypes)Ganglioglioma	0.725	1.231	0.589	0.556	1
NRAS	Glioma	factor(sample_subtypes)Glioblastoma	0.95	0.778	1.221	0.222	1
NRAS	Glioma	factor(sample_subtypes)Glioblastoma Multiforme	0.698	0.761	0.917	0.359	1
NRAS	Glioma	factor(sample_subtypes)Glioma, NOS	1.312	1.007	1.303	0.192	1
NRAS	Glioma	factor(sample_subtypes)Gliosarcoma	1.372	1.243	1.104	0.27	1
NRAS	Glioma	factor(sample_subtypes)High-Grade Glioma, NOS	-0.086	1.23	-0.07	0.944	1
NRAS	Glioma	factor(sample_subtypes)Low-Grade Glioma, NOS	0.199	1.231	0.161	0.872	1
NRAS	Glioma	factor(sample_subtypes)Oligoastrocytoma	-15.168	3597.42	-0.004	0.997	1
NRAS	Glioma	factor(sample_subtypes)Oligodendroglioma	0.888	0.918	0.968	0.333	1
NRAS	Glioma	factor(sample_subtypes)others	-15.28	3856.44	-0.004	0.997	1
NRAS	Glioma	factor(sample_subtypes)Pilocytic Astrocytoma	-15.218	1228.03	-0.012	0.99	1
NRAS	Glioma	factor(sample_subtypes)Pilomyxoid Astrocytoma	-15.039	4404.23	-0.003	0.997	1
NRAS	Glioma	factor(sample_subtypes)Pleomorphic Xanthoastrocytoma	-15.202	3597.18	-0.004	0.997	1
NRAS	Glioma	factor(sample_all$sex)Male	0.439	0.317	1.383	0.167	1
NRAS	Glioma	factor(sample_status)1	-0.818	0.731	-1.12	0.263	1
NRAS	Breast Cancer	factor(aya_status)1	-0.324	1.064	-0.305	0.76	1
NRAS	Breast Cancer	factor(sample_subtypes)Breast Invasive Cancer, NOS	-0.133	4912.96	0	1	1
NRAS	Breast Cancer	factor(sample_subtypes)Breast Invasive Carcinoma, NOS	15.55	4509.8	0.003	0.997	1
NRAS	Breast Cancer	factor(sample_subtypes)Breast Invasive Ductal Carcinoma	14.614	4509.8	0.003	0.997	1
NRAS	Breast Cancer	factor(sample_subtypes)Breast Invasive Lobular Carcinoma	14.804	4509.8	0.003	0.997	1
NRAS	Breast Cancer	factor(sample_subtypes)Breast Invasive Mixed Mucinous Carcinoma	0.087	7287.61	0	1	1
NRAS	Breast Cancer	factor(sample_subtypes)Breast Mixed Ductal and Lobular Carcinoma	-0.026	4864.8	0	1	1
NRAS	Breast Cancer	factor(sample_subtypes)Invasive Breast Carcinoma	14.711	4509.8	0.003	0.997	1
NRAS	Breast Cancer	factor(sample_subtypes)Metaplastic Breast Cancer	17.69	4509.8	0.004	0.997	1
NRAS	Breast Cancer	factor(sample_subtypes)others	17.881	4509.8	0.004	0.997	1
NRAS	Breast Cancer	factor(sample_all$sex)Male	2.048	1.093	1.874	0.0609	0.978
NRAS	Breast Cancer	factor(sample_status)1	0.123	0.623	0.198	0.843	1
NRAS	Colorectal Cancer	factor(aya_status)1	-0.064	0.19	-0.335	0.737	1
NRAS	Colorectal Cancer	factor(sample_subtypes)Colorectal Adenocarcinoma	-0.229	0.171	-1.336	0.182	1
NRAS	Colorectal Cancer	factor(sample_subtypes)Mucinous Adenocarcinoma of the Colon and Rectum	-0.487	0.42	-1.159	0.246	1
NRAS	Colorectal Cancer	factor(sample_subtypes)others	-11.602	214.088	-0.054	0.957	1
NRAS	Colorectal Cancer	factor(sample_subtypes)Rectal Adenocarcinoma	0.107	0.138	0.78	0.436	1
NRAS	Colorectal Cancer	factor(sample_subtypes)Signet Ring Cell Adenocarcinoma of the Colon and Rectum	-0.61	1.016	-0.6	0.549	1
NRAS	Colorectal Cancer	factor(sample_all$sex)Male	0.026	0.11	0.242	0.809	1
NRAS	Colorectal Cancer	factor(sample_status)1	-0.017	0.118	-0.144	0.886	1
NRAS	Soft Tissue Sarcoma	factor(aya_status)1	-0.413	0.465	-0.887	0.375	1
NRAS	Soft Tissue Sarcoma	factor(sample_subtypes)Alveolar Soft Part Sarcoma	0.132	6982.35	0	1	1
NRAS	Soft Tissue Sarcoma	factor(sample_subtypes)Angiosarcoma	18.418	4326.64	0.004	0.997	1
NRAS	Soft Tissue Sarcoma	factor(sample_subtypes)Clear Cell Sarcoma	0.125	7064.33	0	1	1
NRAS	Soft Tissue Sarcoma	factor(sample_subtypes)Dedifferentiated Liposarcoma	15.825	4326.64	0.004	0.997	1
NRAS	Soft Tissue Sarcoma	factor(sample_subtypes)Desmoid/Aggressive Fibromatosis	-0.049	5570.38	0	1	1
NRAS	Soft Tissue Sarcoma	factor(sample_subtypes)Desmoplastic Small-Round-Cell Tumor	-0.118	5375.96	0	1	1
NRAS	Soft Tissue Sarcoma	factor(sample_subtypes)Embryonal Rhabdomyosarcoma	19.83	4326.64	0.005	0.996	1
NRAS	Soft Tissue Sarcoma	factor(sample_subtypes)Epithelioid Hemangioendothelioma	-0.067	6219.07	0	1	1
NRAS	Soft Tissue Sarcoma	factor(sample_subtypes)Epithelioid Sarcoma	0.048	6263.65	0	1	1
NRAS	Soft Tissue Sarcoma	factor(sample_subtypes)Fibrosarcoma	18.818	4326.64	0.004	0.997	1
NRAS	Soft Tissue Sarcoma	factor(sample_subtypes)Follicular Dendritic Cell Sarcoma	-0.343	8672.47	0	1	1
NRAS	Soft Tissue Sarcoma	factor(sample_subtypes)Hemangioma	17.852	4326.64	0.004	0.997	1
NRAS	Soft Tissue Sarcoma	factor(sample_subtypes)Inflammatory Myofibroblastic Tumor	0.016	7555.5	0	1	1
NRAS	Soft Tissue Sarcoma	factor(sample_subtypes)Intimal Sarcoma	-0.033	7550.02	0	1	1
NRAS	Soft Tissue Sarcoma	factor(sample_subtypes)Leiomyosarcoma	0.029	4617.5	0	1	1
NRAS	Soft Tissue Sarcoma	factor(sample_subtypes)Liposarcoma	0.059	7146.36	0	1	1
NRAS	Soft Tissue Sarcoma	factor(sample_subtypes)Myxofibrosarcoma	-0.178	5500.62	0	1	1
NRAS	Soft Tissue Sarcoma	factor(sample_subtypes)Myxoid/Round-Cell Liposarcoma	-0.103	5497.73	0	1	1
NRAS	Soft Tissue Sarcoma	factor(sample_subtypes)others	16.811	4326.64	0.004	0.997	1
NRAS	Soft Tissue Sarcoma	factor(sample_subtypes)Perivascular Epithelioid Cell Tumor	0.067	6303.74	0	1	1
NRAS	Soft Tissue Sarcoma	factor(sample_subtypes)Pleomorphic Liposarcoma	-0.088	6389.43	0	1	1
NRAS	Soft Tissue Sarcoma	factor(sample_subtypes)Radiation-Associated Sarcoma	18.828	4326.64	0.004	0.997	1
NRAS	Soft Tissue Sarcoma	factor(sample_subtypes)Rhabdomyosarcoma	19.142	4326.64	0.004	0.996	1
NRAS	Soft Tissue Sarcoma	factor(sample_subtypes)Round Cell Sarcoma, NOS	-0.078	6301.34	0	1	1
NRAS	Soft Tissue Sarcoma	factor(sample_subtypes)Sarcoma, NOS	17.433	4326.64	0.004	0.997	1
NRAS	Soft Tissue Sarcoma	factor(sample_subtypes)Soft Tissue Myoepithelial Carcinoma	0.171	8432.45	0	1	1
NRAS	Soft Tissue Sarcoma	factor(sample_subtypes)Solitary Fibrous Tumor/Hemangiopericytoma	-0.112	5253.06	0	1	1
NRAS	Soft Tissue Sarcoma	factor(sample_subtypes)Synovial Sarcoma	16.633	4326.64	0.004	0.997	1
NRAS	Soft Tissue Sarcoma	factor(sample_subtypes)Undifferentiated Pleomorphic Sarcoma/Malignant Fibrous Histiocytoma/High-Grade Spindle Cell Sarcoma	17.855	4326.64	0.004	0.997	1
NRAS	Soft Tissue Sarcoma	factor(sample_subtypes)Well-Differentiated Liposarcoma	-0.172	5372.24	0	1	1
NRAS	Soft Tissue Sarcoma	factor(sample_all$sex)Male	0.658	0.331	1.99	0.0466	0.873
NRAS	Soft Tissue Sarcoma	factor(sample_status)1	-0.279	0.413	-0.677	0.498	1
NRAS	Germ Cell Tumor	factor(aya_status)1	0.116	0.453	0.257	0.797	1
NRAS	Germ Cell Tumor	factor(sample_subtypes)Embryonal Carcinoma	-0.122	4312.69	0	1	1
NRAS	Germ Cell Tumor	factor(sample_subtypes)Germ Cell Tumor with Somatic-Type Malignancy	18.173	3460.38	0.005	0.996	1
NRAS	Germ Cell Tumor	factor(sample_subtypes)Immature Teratoma	-0.948	4949.53	0	1	1
NRAS	Germ Cell Tumor	factor(sample_subtypes)Mature Teratoma	-0.818	4764.22	0	1	1
NRAS	Germ Cell Tumor	factor(sample_subtypes)Mixed Germ Cell Tumor	16.421	3460.38	0.005	0.996	1
NRAS	Germ Cell Tumor	factor(sample_subtypes)Non-Seminomatous Germ Cell Tumor	17.265	3460.38	0.005	0.996	1
NRAS	Germ Cell Tumor	factor(sample_subtypes)others	-0.646	4459.92	0	1	1
NRAS	Germ Cell Tumor	factor(sample_subtypes)Seminoma	17.6	3460.38	0.005	0.996	1
NRAS	Germ Cell Tumor	factor(sample_subtypes)Teratoma	-0.21	5388.87	0	1	1
NRAS	Germ Cell Tumor	factor(sample_subtypes)Yolk Sac Tumor	16.947	3460.38	0.005	0.996	1
NRAS	Germ Cell Tumor	factor(sample_all$sex)Male	-0.659	0.763	-0.864	0.388	1
NRAS	Germ Cell Tumor	factor(sample_status)1	-0.552	0.504	-1.096	0.273	1
NRAS	Melanoma	factor(aya_status)1	-0.766	0.199	-3.85	0.000118	0.0174
NRAS	Melanoma	factor(sample_subtypes)Anorectal Mucosal Melanoma	-0.665	0.391	-1.701	0.089	1
NRAS	Melanoma	factor(sample_subtypes)Cutaneous Melanoma	0.534	0.233	2.291	0.022	0.614
NRAS	Melanoma	factor(sample_subtypes)Desmoplastic Melanoma	-16.157	932.406	-0.017	0.986	1
NRAS	Melanoma	factor(sample_subtypes)Head and Neck Mucosal Melanoma	0.068	0.367	0.186	0.852	1
NRAS	Melanoma	factor(sample_subtypes)Melanoma	0.412	0.237	1.739	0.082	1
NRAS	Melanoma	factor(sample_subtypes)Melanoma of Unknown Primary	0.401	0.272	1.475	0.14	1
NRAS	Melanoma	factor(sample_subtypes)Mucosal Melanoma of the Vulva/Vagina	-1.398	0.564	-2.48	0.0131	0.462
NRAS	Melanoma	factor(sample_subtypes)Ocular Melanoma	-16.124	841.624	-0.019	0.985	1
NRAS	Melanoma	factor(sample_subtypes)others	0.285	0.428	0.666	0.506	1
NRAS	Melanoma	factor(sample_subtypes)Uveal Melanoma	-16.093	298.373	-0.054	0.957	1
NRAS	Melanoma	factor(sample_all$sex)Male	-0.011	0.094	-0.121	0.904	1
NRAS	Melanoma	factor(sample_status)1	0.053	0.099	0.538	0.591	1
NRAS	Thyroid Cancer	factor(aya_status)1	-0.44	0.302	-1.46	0.144	1
NRAS	Thyroid Cancer	factor(sample_subtypes)Follicular Thyroid Cancer	0.689	0.418	1.65	0.099	1
NRAS	Thyroid Cancer	factor(sample_subtypes)Hurthle Cell Thyroid Cancer	-1.08	0.569	-1.896	0.0579	0.959
NRAS	Thyroid Cancer	factor(sample_subtypes)Medullary Thyroid Cancer	-16.765	613.576	-0.027	0.978	1
NRAS	Thyroid Cancer	factor(sample_subtypes)others	1.752	0.593	2.955	0.00312	0.19
NRAS	Thyroid Cancer	factor(sample_subtypes)Papillary Thyroid Cancer	-0.723	0.279	-2.588	0.00964	0.386
NRAS	Thyroid Cancer	factor(sample_subtypes)Poorly Differentiated Thyroid Cancer	0.958	0.294	3.263	0.0011	0.0924
NRAS	Thyroid Cancer	factor(sample_all$sex)Male	-0.192	0.184	-1.04	0.298	1
NRAS	Thyroid Cancer	factor(sample_status)1	-0.31	0.191	-1.627	0.104	1
NRAS	Non-Small Cell Lung Cancer	factor(aya_status)1	-15.016	790.545	-0.019	0.985	1
NRAS	Non-Small Cell Lung Cancer	factor(sample_subtypes)Large Cell Lung Carcinoma	-0.046	2964.62	0	1	1
NRAS	Non-Small Cell Lung Cancer	factor(sample_subtypes)Large Cell Neuroendocrine Carcinoma	-0.032	1531.19	0	1	1
NRAS	Non-Small Cell Lung Cancer	factor(sample_subtypes)Lung Adenocarcinoma	15.163	1252.58	0.012	0.99	1
NRAS	Non-Small Cell Lung Cancer	factor(sample_subtypes)Lung Adenosquamous Carcinoma	-0.056	1763.37	0	1	1
NRAS	Non-Small Cell Lung Cancer	factor(sample_subtypes)Lung Carcinoid	0.121	1531.81	0	1	1
NRAS	Non-Small Cell Lung Cancer	factor(sample_subtypes)Lung Neuroendocrine Tumor	0.04	1962.27	0	1	1
NRAS	Non-Small Cell Lung Cancer	factor(sample_subtypes)Lung Squamous Cell Carcinoma	14.131	1252.58	0.011	0.991	1
NRAS	Non-Small Cell Lung Cancer	factor(sample_subtypes)Non-Small Cell Lung Cancer	15.404	1252.58	0.012	0.99	1
NRAS	Non-Small Cell Lung Cancer	factor(sample_subtypes)others	0.102	2129.12	0	1	1
NRAS	Non-Small Cell Lung Cancer	factor(sample_subtypes)Pleomorphic Carcinoma of the Lung	15.543	1252.58	0.012	0.99	1
NRAS	Non-Small Cell Lung Cancer	factor(sample_subtypes)Poorly Differentiated Non-Small Cell Lung Cancer	16.019	1252.58	0.013	0.99	1
NRAS	Non-Small Cell Lung Cancer	factor(sample_subtypes)Sarcomatoid Carcinoma of the Lung	16.344	1252.58	0.013	0.99	1
NRAS	Non-Small Cell Lung Cancer	factor(sample_all$sex)Male	0.177	0.176	1.009	0.313	1
NRAS	Non-Small Cell Lung Cancer	factor(sample_status)1	-0.037	0.18	-0.205	0.838	1
NRAS	Ovarian Cancer	factor(aya_status)1	-0.635	0.558	-1.138	0.255	1
NRAS	Ovarian Cancer	factor(sample_subtypes)Endometrioid Ovarian Cancer	0.606	0.773	0.785	0.433	1
NRAS	Ovarian Cancer	factor(sample_subtypes)High-Grade Serous Fallopian Tube Cancer	0.934	0.829	1.127	0.26	1
NRAS	Ovarian Cancer	factor(sample_subtypes)High-Grade Serous Ovarian Cancer	-0.551	0.634	-0.869	0.385	1
NRAS	Ovarian Cancer	factor(sample_subtypes)Low-Grade Serous Ovarian Cancer	2.101	0.636	3.306	0.000945	0.0821
NRAS	Ovarian Cancer	factor(sample_subtypes)Mixed Ovarian Carcinoma	0.969	0.928	1.044	0.296	1
NRAS	Ovarian Cancer	factor(sample_subtypes)Mucinous Ovarian Cancer	0.086	1.169	0.073	0.941	1
NRAS	Ovarian Cancer	factor(sample_subtypes)others	0.645	1.171	0.551	0.581	1
NRAS	Ovarian Cancer	factor(sample_subtypes)Ovarian Cancer, Other	1.364	0.936	1.457	0.145	1
NRAS	Ovarian Cancer	factor(sample_subtypes)Ovarian Carcinosarcoma/Malignant Mixed Mesodermal Tumor	-0.595	1.162	-0.512	0.608	1
NRAS	Ovarian Cancer	factor(sample_subtypes)Ovarian Epithelial Tumor	-14.42	869.781	-0.017	0.987	1
NRAS	Ovarian Cancer	factor(sample_subtypes)Serous Borderline Ovarian Tumor	-14.321	1096.63	-0.013	0.99	1
NRAS	Ovarian Cancer	factor(sample_subtypes)Serous Ovarian Cancer	1.138	0.743	1.532	0.125	1
NRAS	Ovarian Cancer	factor(sample_subtypes)Small Cell Carcinoma of the Ovary	1.271	1.193	1.066	0.287	1
NRAS	Ovarian Cancer	factor(sample_status)1	-0.072	0.273	-0.263	0.792	1
NRAS	Cancer of Unknown Primary	factor(aya_status)1	0.404	0.54	0.748	0.455	1
NRAS	Cancer of Unknown Primary	factor(sample_subtypes)Cancer of Unknown Primary	0.881	0.411	2.142	0.0322	0.742
NRAS	Cancer of Unknown Primary	factor(sample_subtypes)Cancer of Unknown Primary, NOS	0.925	0.535	1.727	0.0841	1
NRAS	Cancer of Unknown Primary	factor(sample_subtypes)Neuroendocrine Carcinoma, NOS	-0.86	1.06	-0.811	0.418	1
NRAS	Cancer of Unknown Primary	factor(sample_subtypes)Neuroendocrine Tumor, NOS	-15.357	725.793	-0.021	0.983	1
NRAS	Cancer of Unknown Primary	factor(sample_subtypes)others	-15.432	3382.24	-0.005	0.996	1
NRAS	Cancer of Unknown Primary	factor(sample_subtypes)Poorly Differentiated Carcinoma, NOS	0.674	0.511	1.319	0.187	1
NRAS	Cancer of Unknown Primary	factor(sample_subtypes)Small Cell Carcinoma of Unknown Primary	-15.394	1493.33	-0.01	0.992	1
NRAS	Cancer of Unknown Primary	factor(sample_subtypes)Squamous Cell Carcinoma, NOS	-0.446	0.789	-0.566	0.572	1
NRAS	Cancer of Unknown Primary	factor(sample_subtypes)Undifferentiated Malignant Neoplasm	0.939	0.623	1.508	0.132	1
NRAS	Cancer of Unknown Primary	factor(sample_all$sex)Male	0.57	0.298	1.908	0.0563	0.95
NRAS	Cancer of Unknown Primary	factor(sample_all$sex)Unknown	-16.566	10754	-0.002	0.999	1
NRAS	Cancer of Unknown Primary	factor(sample_status)1	-0.376	0.322	-1.167	0.243	1
NRAS	Esophagogastric Cancer	factor(aya_status)1	-16.195	2327.31	-0.007	0.994	1
NRAS	Esophagogastric Cancer	factor(sample_subtypes)Diffuse Type Stomach Adenocarcinoma	-16.354	5461.05	-0.003	0.998	1
NRAS	Esophagogastric Cancer	factor(sample_subtypes)Esophageal Adenocarcinoma	0.654	0.786	0.831	0.406	1
NRAS	Esophagogastric Cancer	factor(sample_subtypes)Esophageal Poorly Differentiated Carcinoma	1.371	1.241	1.105	0.269	1
NRAS	Esophagogastric Cancer	factor(sample_subtypes)Esophageal Squamous Cell Carcinoma	-16.437	2424.2	-0.007	0.995	1
NRAS	Esophagogastric Cancer	factor(sample_subtypes)Esophagogastric Adenocarcinoma	-16.378	1911.22	-0.009	0.993	1
NRAS	Esophagogastric Cancer	factor(sample_subtypes)Intestinal Type Stomach Adenocarcinoma	1.86	1.245	1.494	0.135	1
NRAS	Esophagogastric Cancer	factor(sample_subtypes)others	-16.127	5882.08	-0.003	0.998	1
NRAS	Esophagogastric Cancer	factor(sample_subtypes)Poorly Differentiated Carcinoma of the Stomach	-16.289	2994.76	-0.005	0.996	1
NRAS	Esophagogastric Cancer	factor(sample_subtypes)Signet Ring Cell Carcinoma of the Stomach	-16.2	3289.08	-0.005	0.996	1
NRAS	Esophagogastric Cancer	factor(sample_subtypes)Stomach Adenocarcinoma	-0.512	1.017	-0.504	0.615	1
NRAS	Esophagogastric Cancer	factor(sample_subtypes)Tubular Stomach Adenocarcinoma	-16.496	7089.73	-0.002	0.998	1
NRAS	Esophagogastric Cancer	factor(sample_all$sex)Male	0.055	0.667	0.083	0.934	1
NRAS	Esophagogastric Cancer	factor(sample_status)1	-0.193	0.653	-0.296	0.767	1
NRAS	Hepatobiliary Cancer	factor(aya_status)1	-0.869	1.024	-0.848	0.396	1
NRAS	Hepatobiliary Cancer	factor(sample_subtypes)Extrahepatic Cholangiocarcinoma	-0.589	0.667	-0.883	0.377	1
NRAS	Hepatobiliary Cancer	factor(sample_subtypes)Fibrolamellar Carcinoma	-14.699	1008.51	-0.015	0.988	1
NRAS	Hepatobiliary Cancer	factor(sample_subtypes)Gallbladder Adenocarcinoma, NOS	-1.097	1.062	-1.033	0.301	1
NRAS	Hepatobiliary Cancer	factor(sample_subtypes)Gallbladder Cancer	-2.139	1.058	-2.02	0.0433	0.846
NRAS	Hepatobiliary Cancer	factor(sample_subtypes)Hepatoblastoma	-15.171	1168.62	-0.013	0.99	1
NRAS	Hepatobiliary Cancer	factor(sample_subtypes)Hepatocellular Carcinoma	-1.048	0.603	-1.737	0.0824	1
NRAS	Hepatobiliary Cancer	factor(sample_subtypes)Hepatocellular Carcinoma plus Intrahepatic Cholangiocarcinoma	-0.55	1.063	-0.518	0.605	1
NRAS	Hepatobiliary Cancer	factor(sample_subtypes)Intrahepatic Cholangiocarcinoma	0.069	0.394	0.175	0.861	1
NRAS	Hepatobiliary Cancer	factor(sample_subtypes)others	0.589	1.086	0.542	0.588	1
NRAS	Hepatobiliary Cancer	factor(sample_subtypes)Perihilar Cholangiocarcinoma	-15.251	1450.09	-0.011	0.992	1
NRAS	Hepatobiliary Cancer	factor(sample_all$sex)Male	-0.426	0.323	-1.317	0.188	1
NRAS	Hepatobiliary Cancer	factor(sample_status)1	-0.007	0.362	-0.019	0.985	1
NRAS	Pancreatic Cancer	factor(aya_status)1	0.021	1.062	0.019	0.984	1
NRAS	Pancreatic Cancer	factor(sample_subtypes)Adenosquamous Carcinoma of the Pancreas	-0.77	1.259	-0.612	0.541	1
NRAS	Pancreatic Cancer	factor(sample_subtypes)Intraductal Papillary Mucinous Neoplasm	-15.294	1374.81	-0.011	0.991	1
NRAS	Pancreatic Cancer	factor(sample_subtypes)others	-15.508	1729.85	-0.009	0.993	1
NRAS	Pancreatic Cancer	factor(sample_subtypes)Pancreatic Adenocarcinoma	-1.97	0.772	-2.551	0.0107	0.411
NRAS	Pancreatic Cancer	factor(sample_subtypes)Pancreatic Neuroendocrine Tumor	-1.57	0.897	-1.75	0.0801	1
NRAS	Pancreatic Cancer	factor(sample_subtypes)Solid Pseudopapillary Neoplasm of the Pancreas	-15.686	1488.43	-0.011	0.992	1
NRAS	Pancreatic Cancer	factor(sample_subtypes)Undifferentiated Carcinoma of the Pancreas	-15.403	1120.26	-0.014	0.989	1
NRAS	Pancreatic Cancer	factor(sample_all$sex)Male	-0.896	0.419	-2.138	0.0325	0.744
NRAS	Pancreatic Cancer	factor(sample_status)1	0.407	0.399	1.021	0.307	1
NRAS	Mature B-Cell Neoplasms	factor(aya_status)1	-16.818	3072.42	-0.005	0.996	1
NRAS	Mature B-Cell Neoplasms	factor(sample_subtypes)Diffuse Large B-Cell Lymphoma, NOS	-17.377	1741.95	-0.01	0.992	1
NRAS	Mature B-Cell Neoplasms	factor(sample_subtypes)Follicular Lymphoma	-0.788	1.103	-0.715	0.475	1
NRAS	Mature B-Cell Neoplasms	factor(sample_subtypes)Mantle Cell Lymphoma	0.374	1.114	0.336	0.737	1
NRAS	Mature B-Cell Neoplasms	factor(sample_subtypes)Marginal Zone Lymphoma	-17.55	6796.12	-0.003	0.998	1
NRAS	Mature B-Cell Neoplasms	factor(sample_subtypes)Mature B-Cell Neoplasms	-0.233	1.106	-0.211	0.833	1
NRAS	Mature B-Cell Neoplasms	factor(sample_subtypes)others	-0.075	1.108	-0.068	0.946	1
NRAS	Mature B-Cell Neoplasms	factor(sample_subtypes)Plasma Cell Myeloma	1.541	0.545	2.827	0.00471	0.246
NRAS	Mature B-Cell Neoplasms	factor(sample_all$sex)Male	0.561	0.498	1.127	0.26	1
NRAS	Mature B-Cell Neoplasms	factor(sample_status)1	-16.703	3449.41	-0.005	0.996	1
NRAS	Head and Neck Cancer	factor(aya_status)1	-16.003	2043.76	-0.008	0.994	1
NRAS	Head and Neck Cancer	factor(sample_subtypes)Head and Neck Neuroendocrine Carcinoma	-0.067	5704.09	0	1	1
NRAS	Head and Neck Cancer	factor(sample_subtypes)Head and Neck Squamous Cell Carcinoma	16.643	3645.03	0.005	0.996	1
NRAS	Head and Neck Cancer	factor(sample_subtypes)Head and Neck Squamous Cell Carcinoma of Unknown Primary	-0.083	5085.13	0	1	1
NRAS	Head and Neck Cancer	factor(sample_subtypes)Hypopharynx Squamous Cell Carcinoma	-0.136	5636.43	0	1	1
NRAS	Head and Neck Cancer	factor(sample_subtypes)Larynx Squamous Cell Carcinoma	-0.107	4213.69	0	1	1
NRAS	Head and Neck Cancer	factor(sample_subtypes)Nasopharyngeal Carcinoma	16.658	3645.03	0.005	0.996	1
NRAS	Head and Neck Cancer	factor(sample_subtypes)Oral Cavity Squamous Cell Carcinoma	16.057	3645.03	0.004	0.996	1
NRAS	Head and Neck Cancer	factor(sample_subtypes)Oropharynx Squamous Cell Carcinoma	15.638	3645.03	0.004	0.997	1
NRAS	Head and Neck Cancer	factor(sample_subtypes)others	0.265	4401.52	0	1	1
NRAS	Head and Neck Cancer	factor(sample_subtypes)Sinonasal Squamous Cell Carcinoma	-0.103	4829.02	0	1	1
NRAS	Head and Neck Cancer	factor(sample_all$sex)Male	-0.117	0.605	-0.193	0.847	1
NRAS	Head and Neck Cancer	factor(sample_status)1	-0.07	0.578	-0.121	0.903	1
NRAS	Endometrial Cancer	factor(aya_status)1	-0.106	0.731	-0.145	0.884	1
NRAS	Endometrial Cancer	factor(sample_subtypes)others	-0.225	1.061	-0.212	0.832	1
NRAS	Endometrial Cancer	factor(sample_subtypes)Uterine Carcinosarcoma/Uterine Malignant Mixed Mullerian Tumor	-0.234	0.457	-0.512	0.608	1
NRAS	Endometrial Cancer	factor(sample_subtypes)Uterine Clear Cell Carcinoma	-0.057	0.663	-0.087	0.931	1
NRAS	Endometrial Cancer	factor(sample_subtypes)Uterine Dedifferentiated Carcinoma	-14.241	884.598	-0.016	0.987	1
NRAS	Endometrial Cancer	factor(sample_subtypes)Uterine Endometrioid Carcinoma	0.146	0.337	0.433	0.665	1
NRAS	Endometrial Cancer	factor(sample_subtypes)Uterine Mixed Endometrial Carcinoma	-1.321	1.051	-1.257	0.209	1
NRAS	Endometrial Cancer	factor(sample_subtypes)Uterine Serous Carcinoma/Uterine Papillary Serous Carcinoma	-1.306	0.544	-2.399	0.0164	0.523
NRAS	Endometrial Cancer	factor(sample_subtypes)Uterine Undifferentiated Carcinoma	-14.243	863.281	-0.016	0.987	1
NRAS	Endometrial Cancer	factor(sample_status)1	-0.011	0.266	-0.041	0.967	1
NRAS	Leukemia	factor(aya_status)1	-0.59	0.544	-1.083	0.279	1
NRAS	Leukemia	factor(sample_subtypes)others	-15.492	803.699	-0.019	0.985	1
NRAS	Leukemia	factor(sample_all$sex)Male	-0.153	0.305	-0.503	0.615	1
NRAS	Leukemia	factor(sample_status)1	-0.061	1.074	-0.057	0.954	1
NRAS	Appendiceal Cancer	factor(aya_status)1	-15.842	1645.71	-0.01	0.992	1
NRAS	Appendiceal Cancer	factor(sample_subtypes)Goblet Cell Carcinoid of the Appendix	0.676	0.908	0.744	0.457	1
NRAS	Appendiceal Cancer	factor(sample_subtypes)Mucinous Adenocarcinoma of the Appendix	-0.459	0.776	-0.592	0.554	1
NRAS	Appendiceal Cancer	factor(sample_subtypes)others	-15.955	3958.15	-0.004	0.997	1
NRAS	Appendiceal Cancer	factor(sample_subtypes)Signet Ring Cell Type of the Appendix	-15.954	2304.49	-0.007	0.994	1
NRAS	Appendiceal Cancer	factor(sample_all$sex)Male	0.085	0.69	0.123	0.902	1
NRAS	Appendiceal Cancer	factor(sample_status)1	0.36	0.705	0.511	0.609	1
NRAS	Mesothelioma	factor(aya_status)1	-15.853	5943.44	-0.003	0.998	1
NRAS	Mesothelioma	factor(sample_subtypes)Peritoneal Mesothelioma	0.847	17487.6	0	1	1
NRAS	Mesothelioma	factor(sample_subtypes)Pleural Mesothelioma	-0.072	17371.1	0	1	1
NRAS	Mesothelioma	factor(sample_subtypes)Pleural Mesothelioma, Biphasic Type	18.413	16957.2	0.001	0.999	1
NRAS	Mesothelioma	factor(sample_subtypes)Pleural Mesothelioma, Epithelioid Type	17.731	16957.2	0.001	0.999	1
NRAS	Mesothelioma	factor(sample_subtypes)Pleural Mesothelioma, Sarcomatoid Type	19.091	16957.2	0.001	0.999	1
NRAS	Mesothelioma	factor(sample_all$sex)Male	17.705	3109.51	0.006	0.995	1
NRAS	Mesothelioma	factor(sample_status)1	-17.466	4183.75	-0.004	0.997	1
NRAS	Bladder Cancer	factor(aya_status)1	-15.263	1917.35	-0.008	0.994	1
NRAS	Bladder Cancer	factor(sample_subtypes)Bladder Squamous Cell Carcinoma	-16.155	2395.86	-0.007	0.995	1
NRAS	Bladder Cancer	factor(sample_subtypes)Bladder Urothelial Carcinoma	-0.965	0.753	-1.281	0.2	1
NRAS	Bladder Cancer	factor(sample_subtypes)others	-16.148	1562.13	-0.01	0.992	1
NRAS	Bladder Cancer	factor(sample_subtypes)Plasmacytoid/Signet Ring Cell Bladder Carcinoma	-16.313	2600.92	-0.006	0.995	1
NRAS	Bladder Cancer	factor(sample_subtypes)Small Cell Bladder Cancer	-16.341	1991.36	-0.008	0.993	1
NRAS	Bladder Cancer	factor(sample_subtypes)Upper Tract Urothelial Carcinoma	-0.913	0.852	-1.071	0.284	1
NRAS	Bladder Cancer	factor(sample_subtypes)Urethral Urothelial Carcinoma	-16.358	1812.98	-0.009	0.993	1
NRAS	Bladder Cancer	factor(sample_all$sex)Male	0.511	0.458	1.115	0.265	1
NRAS	Bladder Cancer	factor(sample_status)1	0.073	0.408	0.178	0.859	1
AKT1	Glioma	factor(aya_status)1	-0.269	0.464	-0.58	0.562	1
AKT1	Glioma	factor(sample_subtypes)Anaplastic Oligoastrocytoma	-0.252	4675.91	0	1	1
AKT1	Glioma	factor(sample_subtypes)Anaplastic Oligodendroglioma	16.8	1473.3	0.011	0.991	1
AKT1	Glioma	factor(sample_subtypes)Anaplastic Pleomorphic Xanthoastrocytoma	0.099	6393.02	0	1	1
AKT1	Glioma	factor(sample_subtypes)Astrocytoma	16.902	1473.3	0.011	0.991	1
AKT1	Glioma	factor(sample_subtypes)Diffuse Astrocytoma	17.594	1473.3	0.012	0.99	1
AKT1	Glioma	factor(sample_subtypes)Diffuse Glioma	17.294	1473.3	0.012	0.991	1
AKT1	Glioma	factor(sample_subtypes)Diffuse Intrinsic Pontine Glioma	-0.05	4103.32	0	1	1
AKT1	Glioma	factor(sample_subtypes)Dysembryoplastic Neuroepithelial Tumor	0.038	6844.01	0	1	1
AKT1	Glioma	factor(sample_subtypes)Encapsulated Glioma	0.051	5707.69	0	1	1
AKT1	Glioma	factor(sample_subtypes)Ependymoma	-0.032	3473.13	0	1	1
AKT1	Glioma	factor(sample_subtypes)Ganglioglioma	0.055	3346.54	0	1	1
AKT1	Glioma	factor(sample_subtypes)Glioblastoma	17.324	1473.3	0.012	0.991	1
AKT1	Glioma	factor(sample_subtypes)Glioblastoma Multiforme	16.776	1473.3	0.011	0.991	1
AKT1	Glioma	factor(sample_subtypes)Glioma, NOS	0.015	3160.13	0	1	1
AKT1	Glioma	factor(sample_subtypes)Gliosarcoma	-0.06	4191.09	0	1	1
AKT1	Glioma	factor(sample_subtypes)High-Grade Glioma, NOS	16.702	1473.3	0.011	0.991	1
AKT1	Glioma	factor(sample_subtypes)Low-Grade Glioma, NOS	-0.005	2700.9	0	1	1
AKT1	Glioma	factor(sample_subtypes)Oligoastrocytoma	-0.116	6092	0	1	1
AKT1	Glioma	factor(sample_subtypes)Oligodendroglioma	15.815	1473.3	0.011	0.991	1
AKT1	Glioma	factor(sample_subtypes)others	0.044	6536.89	0	1	1
AKT1	Glioma	factor(sample_subtypes)Pilocytic Astrocytoma	-0.018	2504.54	0	1	1
AKT1	Glioma	factor(sample_subtypes)Pilomyxoid Astrocytoma	-0.255	7369.11	0	1	1
AKT1	Glioma	factor(sample_subtypes)Pleomorphic Xanthoastrocytoma	-0.086	6090.86	0	1	1
AKT1	Glioma	factor(sample_all$sex)Male	-0.234	0.305	-0.77	0.442	1
AKT1	Glioma	factor(sample_status)1	1.039	0.386	2.694	0.00706	0.318
AKT1	Breast Cancer	factor(aya_status)1	-0.504	0.2	-2.521	0.0117	0.431
AKT1	Breast Cancer	factor(sample_subtypes)Breast Invasive Cancer, NOS	-0.29	1.132	-0.256	0.798	1
AKT1	Breast Cancer	factor(sample_subtypes)Breast Invasive Carcinoma, NOS	1.108	1.033	1.073	0.283	1
AKT1	Breast Cancer	factor(sample_subtypes)Breast Invasive Ductal Carcinoma	0.783	1.015	0.772	0.44	1
AKT1	Breast Cancer	factor(sample_subtypes)Breast Invasive Lobular Carcinoma	0.896	1.023	0.875	0.381	1
AKT1	Breast Cancer	factor(sample_subtypes)Breast Invasive Mixed Mucinous Carcinoma	0.62	1.438	0.431	0.666	1
AKT1	Breast Cancer	factor(sample_subtypes)Breast Mixed Ductal and Lobular Carcinoma	0.55	1.063	0.518	0.605	1
AKT1	Breast Cancer	factor(sample_subtypes)Invasive Breast Carcinoma	0.687	1.02	0.674	0.5	1
AKT1	Breast Cancer	factor(sample_subtypes)Metaplastic Breast Cancer	0.017	1.431	0.012	0.991	1
AKT1	Breast Cancer	factor(sample_subtypes)others	-0.516	1.428	-0.362	0.718	1
AKT1	Breast Cancer	factor(sample_all$sex)Male	-1.351	1.007	-1.341	0.18	1
AKT1	Breast Cancer	factor(sample_status)1	0.218	0.108	2.024	0.0429	0.843
AKT1	Colorectal Cancer	factor(aya_status)1	-0.006	0.276	-0.021	0.984	1
AKT1	Colorectal Cancer	factor(sample_subtypes)Colorectal Adenocarcinoma	-0.312	0.258	-1.21	0.226	1
AKT1	Colorectal Cancer	factor(sample_subtypes)Mucinous Adenocarcinoma of the Colon and Rectum	1.216	0.295	4.114	3.89e-05	0.00735
AKT1	Colorectal Cancer	factor(sample_subtypes)others	1.979	0.645	3.069	0.00215	0.148
AKT1	Colorectal Cancer	factor(sample_subtypes)Rectal Adenocarcinoma	-1.095	0.319	-3.436	0.00059	0.0579
AKT1	Colorectal Cancer	factor(sample_subtypes)Signet Ring Cell Adenocarcinoma of the Colon and Rectum	0.188	1.021	0.184	0.854	1
AKT1	Colorectal Cancer	factor(sample_all$sex)Male	-0.152	0.164	-0.927	0.354	1
AKT1	Colorectal Cancer	factor(sample_status)1	-1.001	0.228	-4.383	1.17e-05	0.00276
AKT1	Soft Tissue Sarcoma	factor(aya_status)1	-17.915	2843.67	-0.006	0.995	1
AKT1	Soft Tissue Sarcoma	factor(sample_subtypes)Alveolar Soft Part Sarcoma	0.531	17548.5	0	1	1
AKT1	Soft Tissue Sarcoma	factor(sample_subtypes)Angiosarcoma	18.386	11188.8	0.002	0.999	1
AKT1	Soft Tissue Sarcoma	factor(sample_subtypes)Clear Cell Sarcoma	0.375	17866.7	0	1	1
AKT1	Soft Tissue Sarcoma	factor(sample_subtypes)Dedifferentiated Liposarcoma	-0.363	12266.8	0	1	1
AKT1	Soft Tissue Sarcoma	factor(sample_subtypes)Desmoid/Aggressive Fibromatosis	0.098	14379.4	0	1	1
AKT1	Soft Tissue Sarcoma	factor(sample_subtypes)Desmoplastic Small-Round-Cell Tumor	0.774	13670.6	0	1	1
AKT1	Soft Tissue Sarcoma	factor(sample_subtypes)Embryonal Rhabdomyosarcoma	-0.281	14612.1	0	1	1
AKT1	Soft Tissue Sarcoma	factor(sample_subtypes)Epithelioid Hemangioendothelioma	-0.091	16182.3	0	1	1
AKT1	Soft Tissue Sarcoma	factor(sample_subtypes)Epithelioid Sarcoma	0.093	16116.1	0	1	1
AKT1	Soft Tissue Sarcoma	factor(sample_subtypes)Fibrosarcoma	-0.158	22785.8	0	1	1
AKT1	Soft Tissue Sarcoma	factor(sample_subtypes)Follicular Dendritic Cell Sarcoma	-0.361	23340.3	0	1	1
AKT1	Soft Tissue Sarcoma	factor(sample_subtypes)Hemangioma	-0.027	13244.1	0	1	1
AKT1	Soft Tissue Sarcoma	factor(sample_subtypes)Inflammatory Myofibroblastic Tumor	-0.182	19669.6	0	1	1
AKT1	Soft Tissue Sarcoma	factor(sample_subtypes)Intimal Sarcoma	-0.047	19561.8	0	1	1
AKT1	Soft Tissue Sarcoma	factor(sample_subtypes)Leiomyosarcoma	17.381	11188.8	0.002	0.999	1
AKT1	Soft Tissue Sarcoma	factor(sample_subtypes)Liposarcoma	-0.24	18791.2	0	1	1
AKT1	Soft Tissue Sarcoma	factor(sample_subtypes)Myxofibrosarcoma	-0.427	14513.1	0	1	1
AKT1	Soft Tissue Sarcoma	factor(sample_subtypes)Myxoid/Round-Cell Liposarcoma	20.421	11188.8	0.002	0.999	1
AKT1	Soft Tissue Sarcoma	factor(sample_subtypes)others	-0.098	13381.5	0	1	1
AKT1	Soft Tissue Sarcoma	factor(sample_subtypes)Perivascular Epithelioid Cell Tumor	-0.315	16555.8	0	1	1
AKT1	Soft Tissue Sarcoma	factor(sample_subtypes)Pleomorphic Liposarcoma	-0.222	16777.4	0	1	1
AKT1	Soft Tissue Sarcoma	factor(sample_subtypes)Radiation-Associated Sarcoma	-0.647	22272.2	0	1	1
AKT1	Soft Tissue Sarcoma	factor(sample_subtypes)Rhabdomyosarcoma	0.026	14626.9	0	1	1
AKT1	Soft Tissue Sarcoma	factor(sample_subtypes)Round Cell Sarcoma, NOS	-0.11	16410	0	1	1
AKT1	Soft Tissue Sarcoma	factor(sample_subtypes)Sarcoma, NOS	18.013	11188.8	0.002	0.999	1
AKT1	Soft Tissue Sarcoma	factor(sample_subtypes)Soft Tissue Myoepithelial Carcinoma	0.244	21566.5	0	1	1
AKT1	Soft Tissue Sarcoma	factor(sample_subtypes)Solitary Fibrous Tumor/Hemangiopericytoma	-0.387	13780.5	0	1	1
AKT1	Soft Tissue Sarcoma	factor(sample_subtypes)Synovial Sarcoma	0.392	12772.1	0	1	1
AKT1	Soft Tissue Sarcoma	factor(sample_subtypes)Undifferentiated Pleomorphic Sarcoma/Malignant Fibrous Histiocytoma/High-Grade Spindle Cell Sarcoma	18.422	11188.8	0.002	0.999	1
AKT1	Soft Tissue Sarcoma	factor(sample_subtypes)Well-Differentiated Liposarcoma	-0.397	14147	0	1	1
AKT1	Soft Tissue Sarcoma	factor(sample_all$sex)Male	-0.391	0.691	-0.566	0.571	1
AKT1	Soft Tissue Sarcoma	factor(sample_status)1	-0.088	0.729	-0.12	0.904	1
AKT1	Melanoma	factor(aya_status)1	-0.544	0.732	-0.743	0.458	1
AKT1	Melanoma	factor(sample_subtypes)Anorectal Mucosal Melanoma	14.991	948.296	0.016	0.987	1
AKT1	Melanoma	factor(sample_subtypes)Cutaneous Melanoma	15.498	948.296	0.016	0.987	1
AKT1	Melanoma	factor(sample_subtypes)Desmoplastic Melanoma	16.639	948.296	0.018	0.986	1
AKT1	Melanoma	factor(sample_subtypes)Head and Neck Mucosal Melanoma	0.055	1553.53	0	1	1
AKT1	Melanoma	factor(sample_subtypes)Melanoma	15.616	948.296	0.016	0.987	1
AKT1	Melanoma	factor(sample_subtypes)Melanoma of Unknown Primary	14.843	948.296	0.016	0.988	1
AKT1	Melanoma	factor(sample_subtypes)Mucosal Melanoma of the Vulva/Vagina	15.495	948.296	0.016	0.987	1
AKT1	Melanoma	factor(sample_subtypes)Ocular Melanoma	-0.003	2476.54	0	1	1
AKT1	Melanoma	factor(sample_subtypes)others	-0.017	1926.26	0	1	1
AKT1	Melanoma	factor(sample_subtypes)Uveal Melanoma	14.429	948.296	0.015	0.988	1
AKT1	Melanoma	factor(sample_all$sex)Male	0.336	0.35	0.96	0.337	1
AKT1	Melanoma	factor(sample_status)1	-0.05	0.332	-0.151	0.88	1
AKT1	Thyroid Cancer	factor(aya_status)1	0.447	0.701	0.638	0.524	1
AKT1	Thyroid Cancer	factor(sample_subtypes)Follicular Thyroid Cancer	-17.884	4227.24	-0.004	0.997	1
AKT1	Thyroid Cancer	factor(sample_subtypes)Hurthle Cell Thyroid Cancer	-17.741	3524.11	-0.005	0.996	1
AKT1	Thyroid Cancer	factor(sample_subtypes)Medullary Thyroid Cancer	-17.783	2737.12	-0.006	0.995	1
AKT1	Thyroid Cancer	factor(sample_subtypes)others	-17.583	7766.4	-0.002	0.998	1
AKT1	Thyroid Cancer	factor(sample_subtypes)Papillary Thyroid Cancer	-0.552	0.695	-0.794	0.427	1
AKT1	Thyroid Cancer	factor(sample_subtypes)Poorly Differentiated Thyroid Cancer	-17.765	2218.82	-0.008	0.994	1
AKT1	Thyroid Cancer	factor(sample_all$sex)Male	0.294	0.576	0.511	0.609	1
AKT1	Thyroid Cancer	factor(sample_status)1	-0.625	0.673	-0.93	0.353	1
AKT1	Non-Small Cell Lung Cancer	factor(aya_status)1	0.223	0.726	0.307	0.759	1
AKT1	Non-Small Cell Lung Cancer	factor(sample_subtypes)Large Cell Lung Carcinoma	0.007	1798.39	0	1	1
AKT1	Non-Small Cell Lung Cancer	factor(sample_subtypes)Large Cell Neuroendocrine Carcinoma	15.366	762.31	0.02	0.984	1
AKT1	Non-Small Cell Lung Cancer	factor(sample_subtypes)Lung Adenocarcinoma	13.769	762.31	0.018	0.986	1
AKT1	Non-Small Cell Lung Cancer	factor(sample_subtypes)Lung Adenosquamous Carcinoma	-0.003	1070.98	0	1	1
AKT1	Non-Small Cell Lung Cancer	factor(sample_subtypes)Lung Carcinoid	14.345	762.31	0.019	0.985	1
AKT1	Non-Small Cell Lung Cancer	factor(sample_subtypes)Lung Neuroendocrine Tumor	14.705	762.31	0.019	0.985	1
AKT1	Non-Small Cell Lung Cancer	factor(sample_subtypes)Lung Squamous Cell Carcinoma	13.753	762.31	0.018	0.986	1
AKT1	Non-Small Cell Lung Cancer	factor(sample_subtypes)Non-Small Cell Lung Cancer	12.906	762.31	0.017	0.986	1
AKT1	Non-Small Cell Lung Cancer	factor(sample_subtypes)others	14.999	762.31	0.02	0.984	1
AKT1	Non-Small Cell Lung Cancer	factor(sample_subtypes)Pleomorphic Carcinoma of the Lung	-0.02	1175.58	0	1	1
AKT1	Non-Small Cell Lung Cancer	factor(sample_subtypes)Poorly Differentiated Non-Small Cell Lung Cancer	13.387	762.31	0.018	0.986	1
AKT1	Non-Small Cell Lung Cancer	factor(sample_subtypes)Sarcomatoid Carcinoma of the Lung	-0.065	1210.68	0	1	1
AKT1	Non-Small Cell Lung Cancer	factor(sample_all$sex)Male	0.281	0.208	1.349	0.177	1
AKT1	Non-Small Cell Lung Cancer	factor(sample_status)1	0.027	0.213	0.128	0.898	1
AKT1	Ovarian Cancer	factor(aya_status)1	0.277	0.769	0.361	0.718	1
AKT1	Ovarian Cancer	factor(sample_subtypes)Endometrioid Ovarian Cancer	0.946	0.571	1.658	0.0973	1
AKT1	Ovarian Cancer	factor(sample_subtypes)High-Grade Serous Fallopian Tube Cancer	-16.946	2089.38	-0.008	0.994	1
AKT1	Ovarian Cancer	factor(sample_subtypes)High-Grade Serous Ovarian Cancer	-1.331	0.549	-2.426	0.0153	0.502
AKT1	Ovarian Cancer	factor(sample_subtypes)Low-Grade Serous Ovarian Cancer	-16.986	1305.84	-0.013	0.99	1
AKT1	Ovarian Cancer	factor(sample_subtypes)Mixed Ovarian Carcinoma	-16.959	2558.34	-0.007	0.995	1
AKT1	Ovarian Cancer	factor(sample_subtypes)Mucinous Ovarian Cancer	-17.052	2179.96	-0.008	0.994	1
AKT1	Ovarian Cancer	factor(sample_subtypes)others	-16.99	3038.81	-0.006	0.996	1
AKT1	Ovarian Cancer	factor(sample_subtypes)Ovarian Cancer, Other	-16.931	3085.82	-0.005	0.996	1
AKT1	Ovarian Cancer	factor(sample_subtypes)Ovarian Carcinosarcoma/Malignant Mixed Mesodermal Tumor	-1.044	1.106	-0.944	0.345	1
AKT1	Ovarian Cancer	factor(sample_subtypes)Ovarian Epithelial Tumor	0.74	0.753	0.982	0.326	1
AKT1	Ovarian Cancer	factor(sample_subtypes)Serous Borderline Ovarian Tumor	-17.06	2993.87	-0.006	0.995	1
AKT1	Ovarian Cancer	factor(sample_subtypes)Serous Ovarian Cancer	-0.991	1.105	-0.897	0.37	1
AKT1	Ovarian Cancer	factor(sample_subtypes)Small Cell Carcinoma of the Ovary	-17.091	3692.54	-0.005	0.996	1
AKT1	Ovarian Cancer	factor(sample_status)1	-0.084	0.386	-0.218	0.827	1
AKT1	Cancer of Unknown Primary	factor(aya_status)1	-15.582	887.033	-0.018	0.986	1
AKT1	Cancer of Unknown Primary	factor(sample_subtypes)Cancer of Unknown Primary	0.269	0.459	0.587	0.557	1
AKT1	Cancer of Unknown Primary	factor(sample_subtypes)Cancer of Unknown Primary, NOS	0.288	0.673	0.427	0.669	1
AKT1	Cancer of Unknown Primary	factor(sample_subtypes)Neuroendocrine Carcinoma, NOS	0.763	0.61	1.25	0.211	1
AKT1	Cancer of Unknown Primary	factor(sample_subtypes)Neuroendocrine Tumor, NOS	-0.302	0.787	-0.383	0.702	1
AKT1	Cancer of Unknown Primary	factor(sample_subtypes)others	2.135	1.121	1.904	0.0569	0.954
AKT1	Cancer of Unknown Primary	factor(sample_subtypes)Poorly Differentiated Carcinoma, NOS	0.759	0.51	1.486	0.137	1
AKT1	Cancer of Unknown Primary	factor(sample_subtypes)Small Cell Carcinoma of Unknown Primary	-15.188	1493.03	-0.01	0.992	1
AKT1	Cancer of Unknown Primary	factor(sample_subtypes)Squamous Cell Carcinoma, NOS	1.392	0.474	2.938	0.0033	0.197
AKT1	Cancer of Unknown Primary	factor(sample_subtypes)Undifferentiated Malignant Neoplasm	-15.181	1076.95	-0.014	0.989	1
AKT1	Cancer of Unknown Primary	factor(sample_all$sex)Male	-0.364	0.304	-1.197	0.231	1
AKT1	Cancer of Unknown Primary	factor(sample_all$sex)Unknown	15.159	10844.1	0.001	0.999	1
AKT1	Cancer of Unknown Primary	factor(sample_status)1	-0.202	0.324	-0.622	0.534	1
AKT1	Esophagogastric Cancer	factor(aya_status)1	0.093	1.045	0.089	0.929	1
AKT1	Esophagogastric Cancer	factor(sample_subtypes)Diffuse Type Stomach Adenocarcinoma	1.839	1.246	1.476	0.14	1
AKT1	Esophagogastric Cancer	factor(sample_subtypes)Esophageal Adenocarcinoma	-0.433	0.916	-0.473	0.636	1
AKT1	Esophagogastric Cancer	factor(sample_subtypes)Esophageal Poorly Differentiated Carcinoma	-15.367	2554.24	-0.006	0.995	1
AKT1	Esophagogastric Cancer	factor(sample_subtypes)Esophageal Squamous Cell Carcinoma	-15.418	1470.47	-0.01	0.992	1
AKT1	Esophagogastric Cancer	factor(sample_subtypes)Esophagogastric Adenocarcinoma	1.144	0.873	1.31	0.19	1
AKT1	Esophagogastric Cancer	factor(sample_subtypes)Intestinal Type Stomach Adenocarcinoma	-15.403	3287.81	-0.005	0.996	1
AKT1	Esophagogastric Cancer	factor(sample_subtypes)others	-15.415	3690.61	-0.004	0.997	1
AKT1	Esophagogastric Cancer	factor(sample_subtypes)Poorly Differentiated Carcinoma of the Stomach	-15.419	1845.79	-0.008	0.993	1
AKT1	Esophagogastric Cancer	factor(sample_subtypes)Signet Ring Cell Carcinoma of the Stomach	-15.414	2043.78	-0.008	0.994	1
AKT1	Esophagogastric Cancer	factor(sample_subtypes)Stomach Adenocarcinoma	0.548	0.834	0.657	0.511	1
AKT1	Esophagogastric Cancer	factor(sample_subtypes)Tubular Stomach Adenocarcinoma	3.075	1.037	2.965	0.00302	0.186
AKT1	Esophagogastric Cancer	factor(sample_all$sex)Male	-0.042	0.552	-0.076	0.939	1
AKT1	Esophagogastric Cancer	factor(sample_status)1	-0.392	0.648	-0.605	0.545	1
AKT1	Renal Cell Carcinoma	factor(aya_status)1	-16.127	2222.16	-0.007	0.994	1
AKT1	Renal Cell Carcinoma	factor(sample_subtypes)Collecting Duct Renal Cell Carcinoma	-0.068	7731.82	0	1	1
AKT1	Renal Cell Carcinoma	factor(sample_subtypes)FH-Deficient Renal Cell Carcinoma	0.24	7772.64	0	1	1
AKT1	Renal Cell Carcinoma	factor(sample_subtypes)others	18.218	3136.14	0.006	0.995	1
AKT1	Renal Cell Carcinoma	factor(sample_subtypes)Papillary Renal Cell Carcinoma	-0.174	3969.65	0	1	1
AKT1	Renal Cell Carcinoma	factor(sample_subtypes)Renal Angiomyolipoma	-0.17	6549.99	0	1	1
AKT1	Renal Cell Carcinoma	factor(sample_subtypes)Renal Cell Carcinoma	16.064	3136.14	0.005	0.996	1
AKT1	Renal Cell Carcinoma	factor(sample_subtypes)Renal Clear Cell Carcinoma	16.721	3136.14	0.005	0.996	1
AKT1	Renal Cell Carcinoma	factor(sample_subtypes)Renal Medullary Carcinoma	0.948	7348.3	0	1	1
AKT1	Renal Cell Carcinoma	factor(sample_subtypes)Renal Non-Clear Cell Carcinoma	0.016	6949.38	0	1	1
AKT1	Renal Cell Carcinoma	factor(sample_subtypes)Renal Oncocytoma	17.557	3136.14	0.006	0.996	1
AKT1	Renal Cell Carcinoma	factor(sample_subtypes)Sarcomatoid Renal Cell Carcinoma	-0.13	6833.35	0	1	1
AKT1	Renal Cell Carcinoma	factor(sample_subtypes)Translocation-Associated Renal Cell Carcinoma	0.284	5532.28	0	1	1
AKT1	Renal Cell Carcinoma	factor(sample_subtypes)Unclassified Renal Cell Carcinoma	-0.013	4056.86	0	1	1
AKT1	Renal Cell Carcinoma	factor(sample_all$sex)Male	-0.075	0.704	-0.107	0.915	1
AKT1	Renal Cell Carcinoma	factor(sample_status)1	-1.452	1.067	-1.361	0.173	1
AKT1	Hepatobiliary Cancer	factor(aya_status)1	-17.256	6157.02	-0.003	0.998	1
AKT1	Hepatobiliary Cancer	factor(sample_subtypes)Extrahepatic Cholangiocarcinoma	1.067	0.928	1.15	0.25	1
AKT1	Hepatobiliary Cancer	factor(sample_subtypes)Fibrolamellar Carcinoma	-16.774	10278.6	-0.002	0.999	1
AKT1	Hepatobiliary Cancer	factor(sample_subtypes)Gallbladder Adenocarcinoma, NOS	-19.059	9178.73	-0.002	0.998	1
AKT1	Hepatobiliary Cancer	factor(sample_subtypes)Gallbladder Cancer	-0.218	1.027	-0.212	0.832	1
AKT1	Hepatobiliary Cancer	factor(sample_subtypes)Hepatoblastoma	-17.846	13701.2	-0.001	0.999	1
AKT1	Hepatobiliary Cancer	factor(sample_subtypes)Hepatocellular Carcinoma	-18.004	4055.08	-0.004	0.996	1
AKT1	Hepatobiliary Cancer	factor(sample_subtypes)Hepatocellular Carcinoma plus Intrahepatic Cholangiocarcinoma	-18.572	11225.5	-0.002	0.999	1
AKT1	Hepatobiliary Cancer	factor(sample_subtypes)Intrahepatic Cholangiocarcinoma	-18.561	3270.42	-0.006	0.995	1
AKT1	Hepatobiliary Cancer	factor(sample_subtypes)others	-18.659	18733	-0.001	0.999	1
AKT1	Hepatobiliary Cancer	factor(sample_subtypes)Perihilar Cholangiocarcinoma	-18.522	16889.1	-0.001	0.999	1
AKT1	Hepatobiliary Cancer	factor(sample_all$sex)Male	-1.885	1.1	-1.713	0.0866	1
AKT1	Hepatobiliary Cancer	factor(sample_status)1	0.715	0.784	0.912	0.362	1
AKT1	Pancreatic Cancer	factor(aya_status)1	-15.609	2570.2	-0.006	0.995	1
AKT1	Pancreatic Cancer	factor(sample_subtypes)Adenosquamous Carcinoma of the Pancreas	0.155	5614.12	0	1	1
AKT1	Pancreatic Cancer	factor(sample_subtypes)Intraductal Papillary Mucinous Neoplasm	0.291	7405.35	0	1	1
AKT1	Pancreatic Cancer	factor(sample_subtypes)others	0.473	8698.56	0	1	1
AKT1	Pancreatic Cancer	factor(sample_subtypes)Pancreatic Adenocarcinoma	16.406	4016.55	0.004	0.997	1
AKT1	Pancreatic Cancer	factor(sample_subtypes)Pancreatic Neuroendocrine Tumor	0.228	4259.92	0	1	1
AKT1	Pancreatic Cancer	factor(sample_subtypes)Solid Pseudopapillary Neoplasm of the Pancreas	0.47	7640.25	0	1	1
AKT1	Pancreatic Cancer	factor(sample_subtypes)Undifferentiated Carcinoma of the Pancreas	18.244	4016.55	0.005	0.996	1
AKT1	Pancreatic Cancer	factor(sample_all$sex)Male	0.355	0.519	0.685	0.494	1
AKT1	Pancreatic Cancer	factor(sample_status)1	0.444	0.503	0.884	0.377	1
AKT1	Cervical Cancer	factor(aya_status)1	-17.515	2718.44	-0.006	0.995	1
AKT1	Cervical Cancer	factor(sample_subtypes)Cervical Adenosquamous Carcinoma	18.236	5801.65	0.003	0.997	1
AKT1	Cervical Cancer	factor(sample_subtypes)Cervical Squamous Cell Carcinoma	17.56	5801.65	0.003	0.998	1
AKT1	Cervical Cancer	factor(sample_subtypes)Endocervical Adenocarcinoma	17.673	5801.65	0.003	0.998	1
AKT1	Cervical Cancer	factor(sample_subtypes)Gastric Type Mucinous Carcinoma	-0.156	7734.43	0	1	1
AKT1	Cervical Cancer	factor(sample_subtypes)others	0.219	6647.58	0	1	1
AKT1	Cervical Cancer	factor(sample_all$sex)Male	-0.455	20923.1	0	1	1
AKT1	Cervical Cancer	factor(sample_status)1	-0.041	0.882	-0.046	0.963	1
AKT1	CNS Cancer	factor(aya_status)1	-0.756	1.054	-0.717	0.473	1
AKT1	CNS Cancer	factor(sample_subtypes)Anaplastic Meningioma	0.154	6540.19	0	1	1
AKT1	CNS Cancer	factor(sample_subtypes)Atypical Meningioma	0.094	4757.54	0	1	1
AKT1	CNS Cancer	factor(sample_subtypes)Meningioma	18.432	3487.41	0.005	0.996	1
AKT1	CNS Cancer	factor(sample_subtypes)others	0.096	5004.88	0	1	1
AKT1	CNS Cancer	factor(sample_all$sex)Male	-0.226	0.607	-0.373	0.71	1
AKT1	CNS Cancer	factor(sample_status)1	-17.07	3419.09	-0.005	0.996	1
AKT1	Head and Neck Cancer	factor(aya_status)1	-16.05	3253.56	-0.005	0.996	1
AKT1	Head and Neck Cancer	factor(sample_subtypes)Head and Neck Neuroendocrine Carcinoma	0.059	9379.06	0	1	1
AKT1	Head and Neck Cancer	factor(sample_subtypes)Head and Neck Squamous Cell Carcinoma	17.566	5994.74	0.003	0.998	1
AKT1	Head and Neck Cancer	factor(sample_subtypes)Head and Neck Squamous Cell Carcinoma of Unknown Primary	-0.265	8367.66	0	1	1
AKT1	Head and Neck Cancer	factor(sample_subtypes)Hypopharynx Squamous Cell Carcinoma	-0.03	9265.89	0	1	1
AKT1	Head and Neck Cancer	factor(sample_subtypes)Larynx Squamous Cell Carcinoma	-0.022	6928.94	0	1	1
AKT1	Head and Neck Cancer	factor(sample_subtypes)Nasopharyngeal Carcinoma	0.017	7210.5	0	1	1
AKT1	Head and Neck Cancer	factor(sample_subtypes)Oral Cavity Squamous Cell Carcinoma	15.834	5994.74	0.003	0.998	1
AKT1	Head and Neck Cancer	factor(sample_subtypes)Oropharynx Squamous Cell Carcinoma	17.104	5994.74	0.003	0.998	1
AKT1	Head and Neck Cancer	factor(sample_subtypes)others	0.383	7242.87	0	1	1
AKT1	Head and Neck Cancer	factor(sample_subtypes)Sinonasal Squamous Cell Carcinoma	0.021	7941.51	0	1	1
AKT1	Head and Neck Cancer	factor(sample_all$sex)Male	0.143	0.805	0.177	0.859	1
AKT1	Head and Neck Cancer	factor(sample_status)1	0.463	0.644	0.719	0.472	1
AKT1	Endometrial Cancer	factor(aya_status)1	0.471	0.443	1.062	0.288	1
AKT1	Endometrial Cancer	factor(sample_subtypes)others	0.449	0.791	0.567	0.571	1
AKT1	Endometrial Cancer	factor(sample_subtypes)Uterine Carcinosarcoma/Uterine Malignant Mixed Mullerian Tumor	-1.055	0.589	-1.791	0.0734	1
AKT1	Endometrial Cancer	factor(sample_subtypes)Uterine Clear Cell Carcinoma	-0.049	0.663	-0.074	0.941	1
AKT1	Endometrial Cancer	factor(sample_subtypes)Uterine Dedifferentiated Carcinoma	0.359	1.072	0.335	0.738	1
AKT1	Endometrial Cancer	factor(sample_subtypes)Uterine Endometrioid Carcinoma	0.792	0.324	2.443	0.0146	0.489
AKT1	Endometrial Cancer	factor(sample_subtypes)Uterine Mixed Endometrial Carcinoma	-1.33	1.051	-1.266	0.205	1
AKT1	Endometrial Cancer	factor(sample_subtypes)Uterine Serous Carcinoma/Uterine Papillary Serous Carcinoma	-1.114	0.513	-2.173	0.0298	0.716
AKT1	Endometrial Cancer	factor(sample_subtypes)Uterine Undifferentiated Carcinoma	0.31	1.072	0.29	0.772	1
AKT1	Endometrial Cancer	factor(sample_status)1	0.015	0.221	0.067	0.946	1
AKT1	Appendiceal Cancer	factor(aya_status)1	0.148	1.089	0.136	0.892	1
AKT1	Appendiceal Cancer	factor(sample_subtypes)Goblet Cell Carcinoid of the Appendix	-14.634	1609.65	-0.009	0.993	1
AKT1	Appendiceal Cancer	factor(sample_subtypes)Mucinous Adenocarcinoma of the Appendix	2.245	1.067	2.105	0.0353	0.773
AKT1	Appendiceal Cancer	factor(sample_subtypes)others	-14.316	4017.98	-0.004	0.997	1
AKT1	Appendiceal Cancer	factor(sample_subtypes)Signet Ring Cell Type of the Appendix	-14.374	2321.75	-0.006	0.995	1
AKT1	Appendiceal Cancer	factor(sample_all$sex)Male	0.063	0.651	0.096	0.923	1
AKT1	Appendiceal Cancer	factor(sample_status)1	-0.817	0.668	-1.224	0.221	1
AKT1	Skin Cancer, Non-Melanoma	factor(aya_status)1	2.083	1.23	1.693	0.0905	1
AKT1	Skin Cancer, Non-Melanoma	factor(sample_subtypes)Basal Cell Carcinoma	17.334	3103.96	0.006	0.996	1
AKT1	Skin Cancer, Non-Melanoma	factor(sample_subtypes)Cutaneous Squamous Cell Carcinoma	18.872	3103.96	0.006	0.995	1
AKT1	Skin Cancer, Non-Melanoma	factor(sample_subtypes)Dermatofibrosarcoma Protuberans	0.099	4710.99	0	1	1
AKT1	Skin Cancer, Non-Melanoma	factor(sample_subtypes)Extramammary Paget Disease	0.915	3791.36	0	1	1
AKT1	Skin Cancer, Non-Melanoma	factor(sample_subtypes)Merkel Cell Carcinoma	16.081	3103.96	0.005	0.996	1
AKT1	Skin Cancer, Non-Melanoma	factor(sample_subtypes)others	0.768	4766.43	0	1	1
AKT1	Skin Cancer, Non-Melanoma	factor(sample_subtypes)Sebaceous Carcinoma	18.495	3103.96	0.006	0.995	1
AKT1	Skin Cancer, Non-Melanoma	factor(sample_subtypes)Skin Adnexal Carcinoma	0.865	4777.92	0	1	1
AKT1	Skin Cancer, Non-Melanoma	factor(sample_all$sex)Male	-0.483	0.597	-0.809	0.419	1
AKT1	Skin Cancer, Non-Melanoma	factor(sample_status)1	0.09	0.57	0.157	0.875	1
AKT1	Bladder Cancer	factor(aya_status)1	0.77	1.035	0.744	0.457	1
AKT1	Bladder Cancer	factor(sample_subtypes)Bladder Squamous Cell Carcinoma	-0.028	2771.6	0	1	1
AKT1	Bladder Cancer	factor(sample_subtypes)Bladder Urothelial Carcinoma	15.703	1394.62	0.011	0.991	1
AKT1	Bladder Cancer	factor(sample_subtypes)others	-0.079	2100.96	0	1	1
AKT1	Bladder Cancer	factor(sample_subtypes)Plasmacytoid/Signet Ring Cell Bladder Carcinoma	0.107	2948.5	0	1	1
AKT1	Bladder Cancer	factor(sample_subtypes)Small Cell Bladder Cancer	16.37	1394.62	0.012	0.991	1
AKT1	Bladder Cancer	factor(sample_subtypes)Upper Tract Urothelial Carcinoma	15.625	1394.62	0.011	0.991	1
AKT1	Bladder Cancer	factor(sample_subtypes)Urethral Urothelial Carcinoma	16.157	1394.62	0.012	0.991	1
AKT1	Bladder Cancer	factor(sample_all$sex)Male	-0.479	0.335	-1.429	0.153	1
AKT1	Bladder Cancer	factor(sample_status)1	0.147	0.369	0.398	0.69	1
AKT1	Uterine Sarcoma	factor(aya_status)1	-16.762	3332	-0.005	0.996	1
AKT1	Uterine Sarcoma	factor(sample_subtypes)Low-Grade Endometrial Stromal Sarcoma	17.265	3219.3	0.005	0.996	1
AKT1	Uterine Sarcoma	factor(sample_subtypes)others	15.974	3219.3	0.005	0.996	1
AKT1	Uterine Sarcoma	factor(sample_subtypes)Uterine Adenosarcoma	16.552	3219.3	0.005	0.996	1
AKT1	Uterine Sarcoma	factor(sample_subtypes)Uterine Leiomyosarcoma	15.913	3219.3	0.005	0.996	1
AKT1	Uterine Sarcoma	factor(sample_subtypes)Uterine Perivascular Epithelioid Cell Tumor	-0.517	5194.95	0	1	1
AKT1	Uterine Sarcoma	factor(sample_subtypes)Uterine Sarcoma, Other	-0.503	4347.81	0	1	1
AKT1	Uterine Sarcoma	factor(sample_subtypes)Uterine Sarcoma/Mesenchymal	-0.706	5520.64	0	1	1
AKT1	Uterine Sarcoma	factor(sample_status)1	-1.586	1.112	-1.427	0.154	1
ALK	Glioma	factor(aya_status)1	-0.091	0.232	-0.394	0.694	1
ALK	Glioma	factor(sample_subtypes)Anaplastic Oligoastrocytoma	-15.175	1000.2	-0.015	0.988	1
ALK	Glioma	factor(sample_subtypes)Anaplastic Oligodendroglioma	0.831	0.424	1.958	0.0503	0.902
ALK	Glioma	factor(sample_subtypes)Anaplastic Pleomorphic Xanthoastrocytoma	-15.022	1388.28	-0.011	0.991	1
ALK	Glioma	factor(sample_subtypes)Astrocytoma	-0.795	0.59	-1.348	0.178	1
ALK	Glioma	factor(sample_subtypes)Diffuse Astrocytoma	0.199	0.595	0.334	0.738	1
ALK	Glioma	factor(sample_subtypes)Diffuse Glioma	-0.063	0.593	-0.106	0.916	1
ALK	Glioma	factor(sample_subtypes)Diffuse Intrinsic Pontine Glioma	-15.089	855.027	-0.018	0.986	1
ALK	Glioma	factor(sample_subtypes)Dysembryoplastic Neuroepithelial Tumor	-14.972	1493.7	-0.01	0.992	1
ALK	Glioma	factor(sample_subtypes)Encapsulated Glioma	-15.02	1230.37	-0.012	0.99	1
ALK	Glioma	factor(sample_subtypes)Ependymoma	-15.031	705.182	-0.021	0.983	1
ALK	Glioma	factor(sample_subtypes)Ganglioglioma	-0.976	1.052	-0.928	0.353	1
ALK	Glioma	factor(sample_subtypes)Glioblastoma	0.204	0.357	0.571	0.568	1
ALK	Glioma	factor(sample_subtypes)Glioblastoma Multiforme	-0.103	0.347	-0.299	0.765	1
ALK	Glioma	factor(sample_subtypes)Glioma, NOS	-1.139	1.051	-1.085	0.278	1
ALK	Glioma	factor(sample_subtypes)Gliosarcoma	-0.501	1.058	-0.474	0.636	1
ALK	Glioma	factor(sample_subtypes)High-Grade Glioma, NOS	-0.148	0.516	-0.287	0.774	1
ALK	Glioma	factor(sample_subtypes)Low-Grade Glioma, NOS	0.062	0.549	0.112	0.911	1
ALK	Glioma	factor(sample_subtypes)Oligoastrocytoma	0.298	1.069	0.278	0.781	1
ALK	Glioma	factor(sample_subtypes)Oligodendroglioma	-0.027	0.474	-0.058	0.954	1
ALK	Glioma	factor(sample_subtypes)others	-15.014	1420.8	-0.011	0.992	1
ALK	Glioma	factor(sample_subtypes)Pilocytic Astrocytoma	-1.126	0.776	-1.451	0.147	1
ALK	Glioma	factor(sample_subtypes)Pilomyxoid Astrocytoma	-15.213	1622.86	-0.009	0.993	1
ALK	Glioma	factor(sample_subtypes)Pleomorphic Xanthoastrocytoma	0.323	1.069	0.302	0.762	1
ALK	Glioma	factor(sample_all$sex)Male	-0.314	0.17	-1.853	0.0638	0.998
ALK	Glioma	factor(sample_status)1	0.565	0.247	2.286	0.0222	0.617
ALK	Breast Cancer	factor(aya_status)1	0.051	0.27	0.188	0.851	1
ALK	Breast Cancer	factor(sample_subtypes)Breast Invasive Cancer, NOS	-0.261	1.133	-0.231	0.818	1
ALK	Breast Cancer	factor(sample_subtypes)Breast Invasive Carcinoma, NOS	-0.262	1.085	-0.241	0.809	1
ALK	Breast Cancer	factor(sample_subtypes)Breast Invasive Ductal Carcinoma	-0.476	1.019	-0.466	0.641	1
ALK	Breast Cancer	factor(sample_subtypes)Breast Invasive Lobular Carcinoma	0.024	1.036	0.024	0.981	1
ALK	Breast Cancer	factor(sample_subtypes)Breast Invasive Mixed Mucinous Carcinoma	1.216	1.254	0.97	0.332	1
ALK	Breast Cancer	factor(sample_subtypes)Breast Mixed Ductal and Lobular Carcinoma	0.154	1.082	0.142	0.887	1
ALK	Breast Cancer	factor(sample_subtypes)Invasive Breast Carcinoma	-0.22	1.031	-0.214	0.831	1
ALK	Breast Cancer	factor(sample_subtypes)Metaplastic Breast Cancer	-0.055	1.432	-0.038	0.969	1
ALK	Breast Cancer	factor(sample_subtypes)others	-13.821	460.952	-0.03	0.976	1
ALK	Breast Cancer	factor(sample_all$sex)Male	-13.442	439.821	-0.031	0.976	1
ALK	Breast Cancer	factor(sample_status)1	0.023	0.178	0.128	0.898	1
ALK	Colorectal Cancer	factor(aya_status)1	0.083	0.174	0.476	0.634	1
ALK	Colorectal Cancer	factor(sample_subtypes)Colorectal Adenocarcinoma	-0.689	0.19	-3.62	0.000294	0.0352
ALK	Colorectal Cancer	factor(sample_subtypes)Mucinous Adenocarcinoma of the Colon and Rectum	0.067	0.305	0.22	0.826	1
ALK	Colorectal Cancer	factor(sample_subtypes)others	1.171	0.64	1.829	0.0674	1
ALK	Colorectal Cancer	factor(sample_subtypes)Rectal Adenocarcinoma	-0.358	0.15	-2.393	0.0167	0.527
ALK	Colorectal Cancer	factor(sample_subtypes)Signet Ring Cell Adenocarcinoma of the Colon and Rectum	0.356	0.606	0.587	0.557	1
ALK	Colorectal Cancer	factor(sample_all$sex)Male	0.023	0.106	0.216	0.829	1
ALK	Colorectal Cancer	factor(sample_status)1	-0.274	0.12	-2.283	0.0224	0.62
ALK	Soft Tissue Sarcoma	factor(aya_status)1	0.036	0.417	0.087	0.931	1
ALK	Soft Tissue Sarcoma	factor(sample_subtypes)Alveolar Soft Part Sarcoma	0.026	4254.83	0	1	1
ALK	Soft Tissue Sarcoma	factor(sample_subtypes)Angiosarcoma	17.544	2636.3	0.007	0.995	1
ALK	Soft Tissue Sarcoma	factor(sample_subtypes)Clear Cell Sarcoma	0.025	4303.17	0	1	1
ALK	Soft Tissue Sarcoma	factor(sample_subtypes)Dedifferentiated Liposarcoma	15.006	2636.3	0.006	0.995	1
ALK	Soft Tissue Sarcoma	factor(sample_subtypes)Desmoid/Aggressive Fibromatosis	16.296	2636.3	0.006	0.995	1
ALK	Soft Tissue Sarcoma	factor(sample_subtypes)Desmoplastic Small-Round-Cell Tumor	-0.113	3275.04	0	1	1
ALK	Soft Tissue Sarcoma	factor(sample_subtypes)Embryonal Rhabdomyosarcoma	16.274	2636.3	0.006	0.995	1
ALK	Soft Tissue Sarcoma	factor(sample_subtypes)Epithelioid Hemangioendothelioma	16.807	2636.3	0.006	0.995	1
ALK	Soft Tissue Sarcoma	factor(sample_subtypes)Epithelioid Sarcoma	16.886	2636.3	0.006	0.995	1
ALK	Soft Tissue Sarcoma	factor(sample_subtypes)Fibrosarcoma	-0.012	5271.62	0	1	1
ALK	Soft Tissue Sarcoma	factor(sample_subtypes)Follicular Dendritic Cell Sarcoma	17.815	2636.3	0.007	0.995	1
ALK	Soft Tissue Sarcoma	factor(sample_subtypes)Hemangioma	17.181	2636.3	0.007	0.995	1
ALK	Soft Tissue Sarcoma	factor(sample_subtypes)Inflammatory Myofibroblastic Tumor	0.003	4601.04	0	1	1
ALK	Soft Tissue Sarcoma	factor(sample_subtypes)Intimal Sarcoma	17.49	2636.3	0.007	0.995	1
ALK	Soft Tissue Sarcoma	factor(sample_subtypes)Leiomyosarcoma	16.493	2636.3	0.006	0.995	1
ALK	Soft Tissue Sarcoma	factor(sample_subtypes)Liposarcoma	0.084	4357.95	0	1	1
ALK	Soft Tissue Sarcoma	factor(sample_subtypes)Myxofibrosarcoma	-0.023	3351.75	0	1	1
ALK	Soft Tissue Sarcoma	factor(sample_subtypes)Myxoid/Round-Cell Liposarcoma	-0.061	3351.37	0	1	1
ALK	Soft Tissue Sarcoma	factor(sample_subtypes)others	-0.038	3142.24	0	1	1
ALK	Soft Tissue Sarcoma	factor(sample_subtypes)Perivascular Epithelioid Cell Tumor	16.982	2636.3	0.006	0.995	1
ALK	Soft Tissue Sarcoma	factor(sample_subtypes)Pleomorphic Liposarcoma	-0.009	3895.31	0	1	1
ALK	Soft Tissue Sarcoma	factor(sample_subtypes)Radiation-Associated Sarcoma	17.858	2636.3	0.007	0.995	1
ALK	Soft Tissue Sarcoma	factor(sample_subtypes)Rhabdomyosarcoma	-0.085	3440.2	0	1	1
ALK	Soft Tissue Sarcoma	factor(sample_subtypes)Round Cell Sarcoma, NOS	16.849	2636.3	0.006	0.995	1
ALK	Soft Tissue Sarcoma	factor(sample_subtypes)Sarcoma, NOS	16.53	2636.3	0.006	0.995	1
ALK	Soft Tissue Sarcoma	factor(sample_subtypes)Soft Tissue Myoepithelial Carcinoma	0.085	5148.58	0	1	1
ALK	Soft Tissue Sarcoma	factor(sample_subtypes)Solitary Fibrous Tumor/Hemangiopericytoma	16.023	2636.3	0.006	0.995	1
ALK	Soft Tissue Sarcoma	factor(sample_subtypes)Synovial Sarcoma	16.3	2636.3	0.006	0.995	1
ALK	Soft Tissue Sarcoma	factor(sample_subtypes)Undifferentiated Pleomorphic Sarcoma/Malignant Fibrous Histiocytoma/High-Grade Spindle Cell Sarcoma	17.115	2636.3	0.006	0.995	1
ALK	Soft Tissue Sarcoma	factor(sample_subtypes)Well-Differentiated Liposarcoma	-0.013	3273.49	0	1	1
ALK	Soft Tissue Sarcoma	factor(sample_all$sex)Male	0.351	0.319	1.099	0.272	1
ALK	Soft Tissue Sarcoma	factor(sample_status)1	-0.253	0.382	-0.663	0.507	1
ALK	Melanoma	factor(aya_status)1	-1.322	0.367	-3.602	0.000315	0.0369
ALK	Melanoma	factor(sample_subtypes)Anorectal Mucosal Melanoma	-12.655	391.738	-0.032	0.974	1
ALK	Melanoma	factor(sample_subtypes)Cutaneous Melanoma	3.009	1.008	2.985	0.00283	0.178
ALK	Melanoma	factor(sample_subtypes)Desmoplastic Melanoma	4.092	1.122	3.646	0.000266	0.0326
ALK	Melanoma	factor(sample_subtypes)Head and Neck Mucosal Melanoma	1.337	1.235	1.082	0.279	1
ALK	Melanoma	factor(sample_subtypes)Melanoma	2.968	1.009	2.941	0.00327	0.196
ALK	Melanoma	factor(sample_subtypes)Melanoma of Unknown Primary	3.036	1.023	2.967	0.00301	0.185
ALK	Melanoma	factor(sample_subtypes)Mucosal Melanoma of the Vulva/Vagina	1.452	1.237	1.174	0.24	1
ALK	Melanoma	factor(sample_subtypes)Ocular Melanoma	-12.677	840.156	-0.015	0.988	1
ALK	Melanoma	factor(sample_subtypes)others	2.881	1.113	2.588	0.00964	0.386
ALK	Melanoma	factor(sample_subtypes)Uveal Melanoma	0.868	1.161	0.748	0.455	1
ALK	Melanoma	factor(sample_all$sex)Male	0.237	0.132	1.798	0.0722	1
ALK	Melanoma	factor(sample_status)1	0.053	0.134	0.393	0.695	1
ALK	Thyroid Cancer	factor(aya_status)1	-1.321	1.045	-1.265	0.206	1
ALK	Thyroid Cancer	factor(sample_subtypes)Follicular Thyroid Cancer	-16.594	2546	-0.007	0.995	1
ALK	Thyroid Cancer	factor(sample_subtypes)Hurthle Cell Thyroid Cancer	-0.417	1.168	-0.357	0.721	1
ALK	Thyroid Cancer	factor(sample_subtypes)Medullary Thyroid Cancer	0.348	0.843	0.412	0.68	1
ALK	Thyroid Cancer	factor(sample_subtypes)others	-16.826	4712.25	-0.004	0.997	1
ALK	Thyroid Cancer	factor(sample_subtypes)Papillary Thyroid Cancer	-0.344	0.666	-0.517	0.605	1
ALK	Thyroid Cancer	factor(sample_subtypes)Poorly Differentiated Thyroid Cancer	-16.721	1343.19	-0.012	0.99	1
ALK	Thyroid Cancer	factor(sample_all$sex)Male	-0.611	0.513	-1.192	0.233	1
ALK	Thyroid Cancer	factor(sample_status)1	-0.029	0.499	-0.058	0.954	1
ALK	Non-Small Cell Lung Cancer	factor(aya_status)1	0.006	0.366	0.017	0.986	1
ALK	Non-Small Cell Lung Cancer	factor(sample_subtypes)Large Cell Lung Carcinoma	-10.258	220.454	-0.047	0.963	1
ALK	Non-Small Cell Lung Cancer	factor(sample_subtypes)Large Cell Neuroendocrine Carcinoma	1.367	1.071	1.277	0.202	1
ALK	Non-Small Cell Lung Cancer	factor(sample_subtypes)Lung Adenocarcinoma	1.253	1.008	1.242	0.214	1
ALK	Non-Small Cell Lung Cancer	factor(sample_subtypes)Lung Adenosquamous Carcinoma	1.45	1.131	1.282	0.2	1
ALK	Non-Small Cell Lung Cancer	factor(sample_subtypes)Lung Carcinoid	0.12	1.234	0.097	0.923	1
ALK	Non-Small Cell Lung Cancer	factor(sample_subtypes)Lung Neuroendocrine Tumor	1.108	1.239	0.894	0.371	1
ALK	Non-Small Cell Lung Cancer	factor(sample_subtypes)Lung Squamous Cell Carcinoma	1.508	1.016	1.484	0.138	1
ALK	Non-Small Cell Lung Cancer	factor(sample_subtypes)Non-Small Cell Lung Cancer	1.482	1.023	1.449	0.147	1
ALK	Non-Small Cell Lung Cancer	factor(sample_subtypes)others	0.741	1.429	0.519	0.604	1
ALK	Non-Small Cell Lung Cancer	factor(sample_subtypes)Pleomorphic Carcinoma of the Lung	1.832	1.134	1.616	0.106	1
ALK	Non-Small Cell Lung Cancer	factor(sample_subtypes)Poorly Differentiated Non-Small Cell Lung Cancer	1.79	1.045	1.713	0.0867	1
ALK	Non-Small Cell Lung Cancer	factor(sample_subtypes)Sarcomatoid Carcinoma of the Lung	1.852	1.135	1.632	0.103	1
ALK	Non-Small Cell Lung Cancer	factor(sample_all$sex)Male	0.128	0.089	1.435	0.151	1
ALK	Non-Small Cell Lung Cancer	factor(sample_status)1	0.27	0.089	3.036	0.0024	0.161
ALK	Ovarian Cancer	factor(aya_status)1	-0.487	0.756	-0.644	0.519	1
ALK	Ovarian Cancer	factor(sample_subtypes)Endometrioid Ovarian Cancer	0.121	0.617	0.196	0.844	1
ALK	Ovarian Cancer	factor(sample_subtypes)High-Grade Serous Fallopian Tube Cancer	-0.898	1.09	-0.824	0.41	1
ALK	Ovarian Cancer	factor(sample_subtypes)High-Grade Serous Ovarian Cancer	-0.225	0.447	-0.502	0.615	1
ALK	Ovarian Cancer	factor(sample_subtypes)Low-Grade Serous Ovarian Cancer	-0.068	0.622	-0.11	0.912	1
ALK	Ovarian Cancer	factor(sample_subtypes)Mixed Ovarian Carcinoma	-0.45	1.093	-0.412	0.68	1
ALK	Ovarian Cancer	factor(sample_subtypes)Mucinous Ovarian Cancer	-15.039	800.025	-0.019	0.985	1
ALK	Ovarian Cancer	factor(sample_subtypes)others	-0.074	1.097	-0.067	0.946	1
ALK	Ovarian Cancer	factor(sample_subtypes)Ovarian Cancer, Other	-0.039	1.099	-0.036	0.971	1
ALK	Ovarian Cancer	factor(sample_subtypes)Ovarian Carcinosarcoma/Malignant Mixed Mesodermal Tumor	-0.587	0.827	-0.71	0.478	1
ALK	Ovarian Cancer	factor(sample_subtypes)Ovarian Epithelial Tumor	-15.105	870.051	-0.017	0.986	1
ALK	Ovarian Cancer	factor(sample_subtypes)Serous Borderline Ovarian Tumor	-0.046	1.107	-0.041	0.967	1
ALK	Ovarian Cancer	factor(sample_subtypes)Serous Ovarian Cancer	-0.497	0.827	-0.601	0.548	1
ALK	Ovarian Cancer	factor(sample_subtypes)Small Cell Carcinoma of the Ovary	-14.953	1354.62	-0.011	0.991	1
ALK	Ovarian Cancer	factor(sample_status)1	-0.183	0.246	-0.744	0.457	1
ALK	Cancer of Unknown Primary	factor(aya_status)1	-1.137	0.723	-1.573	0.116	1
ALK	Cancer of Unknown Primary	factor(sample_subtypes)Cancer of Unknown Primary	0.38	0.304	1.248	0.212	1
ALK	Cancer of Unknown Primary	factor(sample_subtypes)Cancer of Unknown Primary, NOS	0.684	0.398	1.72	0.0854	1
ALK	Cancer of Unknown Primary	factor(sample_subtypes)Neuroendocrine Carcinoma, NOS	0.443	0.45	0.984	0.325	1
ALK	Cancer of Unknown Primary	factor(sample_subtypes)Neuroendocrine Tumor, NOS	-0.785	0.625	-1.256	0.209	1
ALK	Cancer of Unknown Primary	factor(sample_subtypes)others	-12.161	456.426	-0.027	0.979	1
ALK	Cancer of Unknown Primary	factor(sample_subtypes)Poorly Differentiated Carcinoma, NOS	0.833	0.339	2.456	0.0141	0.48
ALK	Cancer of Unknown Primary	factor(sample_subtypes)Small Cell Carcinoma of Unknown Primary	0.666	0.639	1.042	0.297	1
ALK	Cancer of Unknown Primary	factor(sample_subtypes)Squamous Cell Carcinoma, NOS	0.814	0.362	2.249	0.0245	0.649
ALK	Cancer of Unknown Primary	factor(sample_subtypes)Undifferentiated Malignant Neoplasm	0.291	0.565	0.516	0.606	1
ALK	Cancer of Unknown Primary	factor(sample_all$sex)Male	0.144	0.203	0.711	0.477	1
ALK	Cancer of Unknown Primary	factor(sample_all$sex)Unknown	-11.422	1455.4	-0.008	0.994	1
[truncated: 101,112 more rows]

## Sheet: model_TMB
Gene	Cancer Type	Variable	Estimate	Std..Error	z.value	P value	FDR
ABL1	Glioma	factor(aya_status)1	0.111	0.334	0.332	0.74	1
ABL1	Glioma	TMB	0.025	0.002	10.79	3.85e-27	6.65e-25
ABL1	Glioma	factor(sample_subtypes)Anaplastic Oligoastrocytoma	1.855	1.495	1.241	0.215	1
ABL1	Glioma	factor(sample_subtypes)Anaplastic Oligodendroglioma	1.842	1.138	1.618	0.106	0.795
ABL1	Glioma	factor(sample_subtypes)Anaplastic Pleomorphic Xanthoastrocytoma	-13.09	2344.82	-0.006	0.996	1
ABL1	Glioma	factor(sample_subtypes)Astrocytoma	1.586	1.17	1.355	0.175	1
ABL1	Glioma	factor(sample_subtypes)Diffuse Astrocytoma	1.656	1.429	1.158	0.247	1
ABL1	Glioma	factor(sample_subtypes)Diffuse Glioma	-13.197	873.468	-0.015	0.988	1
ABL1	Glioma	factor(sample_subtypes)Diffuse Intrinsic Pontine Glioma	2.431	1.439	1.689	0.0911	0.727
ABL1	Glioma	factor(sample_subtypes)Dysembryoplastic Neuroepithelial Tumor	3.44	1.451	2.371	0.0177	0.222
ABL1	Glioma	factor(sample_subtypes)Encapsulated Glioma	-13.089	2030.29	-0.006	0.995	1
ABL1	Glioma	factor(sample_subtypes)Ependymoma	1.878	1.432	1.311	0.19	1
ABL1	Glioma	factor(sample_subtypes)Ganglioglioma	-13.114	1106.7	-0.012	0.991	1
ABL1	Glioma	factor(sample_subtypes)Glioblastoma	1.892	1.053	1.797	0.0723	0.628
ABL1	Glioma	factor(sample_subtypes)Glioblastoma Multiforme	1.895	1.037	1.827	0.0678	0.603
ABL1	Glioma	factor(sample_subtypes)Glioma, NOS	-13.185	1200.05	-0.011	0.991	1
ABL1	Glioma	factor(sample_subtypes)Gliosarcoma	-13.339	1421.86	-0.009	0.993	1
ABL1	Glioma	factor(sample_subtypes)High-Grade Glioma, NOS	-0.037	1.498	-0.025	0.98	1
ABL1	Glioma	factor(sample_subtypes)Low-Grade Glioma, NOS	1.264	1.43	0.884	0.377	1
ABL1	Glioma	factor(sample_subtypes)Oligoastrocytoma	3.538	1.266	2.795	0.00519	0.0786
ABL1	Glioma	factor(sample_subtypes)Oligodendroglioma	1.537	1.175	1.308	0.191	1
ABL1	Glioma	factor(sample_subtypes)others	3.483	1.446	2.408	0.016	0.204
ABL1	Glioma	factor(sample_subtypes)Pilocytic Astrocytoma	2.199	1.176	1.87	0.0614	0.565
ABL1	Glioma	factor(sample_subtypes)Pilomyxoid Astrocytoma	-13.197	2654.45	-0.005	0.996	1
ABL1	Glioma	factor(sample_subtypes)Pleomorphic Xanthoastrocytoma	-13.218	2174.05	-0.006	0.995	1
ABL1	Glioma	factor(sample_all$sex)Male	0.191	0.261	0.735	0.462	1
ABL1	Glioma	factor(sample_status)1	1.174	0.308	3.815	0.000136	0.00289
ABL1	Breast Cancer	factor(aya_status)1	0.039	0.359	0.11	0.912	1
ABL1	Breast Cancer	TMB	0.054	0.01	5.159	2.49e-07	8.34e-06
ABL1	Breast Cancer	factor(sample_subtypes)Breast Invasive Cancer, NOS	13.104	617.293	0.021	0.983	1
ABL1	Breast Cancer	factor(sample_subtypes)Breast Invasive Carcinoma, NOS	13.019	617.293	0.021	0.983	1
ABL1	Breast Cancer	factor(sample_subtypes)Breast Invasive Ductal Carcinoma	12.647	617.293	0.02	0.984	1
ABL1	Breast Cancer	factor(sample_subtypes)Breast Invasive Lobular Carcinoma	13.101	617.293	0.021	0.983	1
ABL1	Breast Cancer	factor(sample_subtypes)Breast Invasive Mixed Mucinous Carcinoma	15.116	617.294	0.024	0.98	1
ABL1	Breast Cancer	factor(sample_subtypes)Breast Mixed Ductal and Lobular Carcinoma	11.888	617.294	0.019	0.985	1
ABL1	Breast Cancer	factor(sample_subtypes)Invasive Breast Carcinoma	13.22	617.293	0.021	0.983	1
ABL1	Breast Cancer	factor(sample_subtypes)Metaplastic Breast Cancer	-0.018	853.341	0	1	1
ABL1	Breast Cancer	factor(sample_subtypes)others	13.972	617.294	0.023	0.982	1
ABL1	Breast Cancer	factor(sample_all$sex)Male	0.311	1.018	0.305	0.76	1
ABL1	Breast Cancer	factor(sample_status)1	0.077	0.235	0.329	0.743	1
ABL1	Colorectal Cancer	factor(aya_status)1	-0.125	0.275	-0.454	0.65	1
ABL1	Colorectal Cancer	TMB	0.033	0.002	14.916	2.6e-50	2.15e-47
ABL1	Colorectal Cancer	factor(sample_subtypes)Colorectal Adenocarcinoma	-0.25	0.283	-0.883	0.377	1
ABL1	Colorectal Cancer	factor(sample_subtypes)Mucinous Adenocarcinoma of the Colon and Rectum	0.816	0.32	2.553	0.0107	0.146
ABL1	Colorectal Cancer	factor(sample_subtypes)others	-13.694	336.84	-0.041	0.968	1
ABL1	Colorectal Cancer	factor(sample_subtypes)Rectal Adenocarcinoma	-0.097	0.239	-0.407	0.684	1
ABL1	Colorectal Cancer	factor(sample_subtypes)Signet Ring Cell Adenocarcinoma of the Colon and Rectum	0.341	1.006	0.339	0.734	1
ABL1	Colorectal Cancer	factor(sample_all$sex)Male	-0.374	0.164	-2.271	0.0231	0.275
ABL1	Colorectal Cancer	factor(sample_status)1	-0.579	0.208	-2.78	0.00544	0.0818
ABL1	Soft Tissue Sarcoma	factor(aya_status)1	-0.691	0.822	-0.841	0.401	1
ABL1	Soft Tissue Sarcoma	TMB	0.077	0.013	5.857	4.7e-09	1.94e-07
ABL1	Soft Tissue Sarcoma	factor(sample_subtypes)Alveolar Soft Part Sarcoma	0.147	11509.4	0	1	1
ABL1	Soft Tissue Sarcoma	factor(sample_subtypes)Angiosarcoma	16.822	7137.71	0.002	0.998	1
ABL1	Soft Tissue Sarcoma	factor(sample_subtypes)Clear Cell Sarcoma	0.136	11644.2	0	1	1
ABL1	Soft Tissue Sarcoma	factor(sample_subtypes)Dedifferentiated Liposarcoma	-0.224	7770.26	0	1	1
ABL1	Soft Tissue Sarcoma	factor(sample_subtypes)Desmoid/Aggressive Fibromatosis	-0.149	9190.81	0	1	1
ABL1	Soft Tissue Sarcoma	factor(sample_subtypes)Desmoplastic Small-Round-Cell Tumor	0.135	8858.33	0	1	1
ABL1	Soft Tissue Sarcoma	factor(sample_subtypes)Embryonal Rhabdomyosarcoma	18.031	7137.71	0.003	0.998	1
ABL1	Soft Tissue Sarcoma	factor(sample_subtypes)Epithelioid Hemangioendothelioma	-0.08	10267.9	0	1	1
ABL1	Soft Tissue Sarcoma	factor(sample_subtypes)Epithelioid Sarcoma	-0.325	10178.6	0	1	1
ABL1	Soft Tissue Sarcoma	factor(sample_subtypes)Follicular Dendritic Cell Sarcoma	-0.463	14267.4	0	1	1
ABL1	Soft Tissue Sarcoma	factor(sample_subtypes)Hemangioma	-0.207	8437.29	0	1	1
ABL1	Soft Tissue Sarcoma	factor(sample_subtypes)Inflammatory Myofibroblastic Tumor	-0.073	12456.7	0	1	1
ABL1	Soft Tissue Sarcoma	factor(sample_subtypes)Intimal Sarcoma	-0.182	12438.5	0	1	1
ABL1	Soft Tissue Sarcoma	factor(sample_subtypes)Leiomyosarcoma	18.095	7137.71	0.003	0.998	1
ABL1	Soft Tissue Sarcoma	factor(sample_subtypes)Liposarcoma	-0.147	11945.2	0	1	1
ABL1	Soft Tissue Sarcoma	factor(sample_subtypes)Myxofibrosarcoma	-0.364	9077.47	0	1	1
ABL1	Soft Tissue Sarcoma	factor(sample_subtypes)Myxoid/Round-Cell Liposarcoma	-0.094	9069.04	0	1	1
ABL1	Soft Tissue Sarcoma	factor(sample_subtypes)others	-0.221	8362.18	0	1	1
ABL1	Soft Tissue Sarcoma	factor(sample_subtypes)Perivascular Epithelioid Cell Tumor	-0.212	10469.4	0	1	1
ABL1	Soft Tissue Sarcoma	factor(sample_subtypes)Pleomorphic Liposarcoma	-0.307	10533.5	0	1	1
ABL1	Soft Tissue Sarcoma	factor(sample_subtypes)Radiation-Associated Sarcoma	-0.383	13674.8	0	1	1
ABL1	Soft Tissue Sarcoma	factor(sample_subtypes)Rhabdomyosarcoma	-0.177	9325.47	0	1	1
ABL1	Soft Tissue Sarcoma	factor(sample_subtypes)Round Cell Sarcoma, NOS	-0.165	10394.6	0	1	1
ABL1	Soft Tissue Sarcoma	factor(sample_subtypes)Sarcoma, NOS	16.427	7137.71	0.002	0.998	1
ABL1	Soft Tissue Sarcoma	factor(sample_subtypes)Soft Tissue Myoepithelial Carcinoma	-0.671	13277.8	0	1	1
ABL1	Soft Tissue Sarcoma	factor(sample_subtypes)Solitary Fibrous Tumor/Hemangiopericytoma	-0.21	8674.67	0	1	1
ABL1	Soft Tissue Sarcoma	factor(sample_subtypes)Synovial Sarcoma	19.096	7137.71	0.003	0.998	1
ABL1	Soft Tissue Sarcoma	factor(sample_subtypes)Undifferentiated Pleomorphic Sarcoma/Malignant Fibrous Histiocytoma/High-Grade Spindle Cell Sarcoma	17.695	7137.71	0.002	0.998	1
ABL1	Soft Tissue Sarcoma	factor(sample_subtypes)Well-Differentiated Liposarcoma	-0.166	8876.77	0	1	1
ABL1	Soft Tissue Sarcoma	factor(sample_all$sex)Male	0.184	0.513	0.359	0.719	1
ABL1	Soft Tissue Sarcoma	factor(sample_status)1	-0.141	0.532	-0.265	0.791	1
ABL1	Melanoma	factor(aya_status)1	-0.123	0.46	-0.267	0.789	1
ABL1	Melanoma	TMB	0.024	0.003	9.144	6.01e-20	5.69e-18
ABL1	Melanoma	factor(sample_subtypes)Anorectal Mucosal Melanoma	1.002	1.234	0.811	0.417	1
ABL1	Melanoma	factor(sample_subtypes)Cutaneous Melanoma	1.088	1.021	1.066	0.287	1
ABL1	Melanoma	factor(sample_subtypes)Desmoplastic Melanoma	0.563	1.513	0.372	0.71	1
ABL1	Melanoma	factor(sample_subtypes)Head and Neck Mucosal Melanoma	0.588	1.425	0.413	0.68	1
ABL1	Melanoma	factor(sample_subtypes)Melanoma	1.452	1.021	1.421	0.155	0.983
ABL1	Melanoma	factor(sample_subtypes)Melanoma of Unknown Primary	1.275	1.056	1.208	0.227	1
ABL1	Melanoma	factor(sample_subtypes)Mucosal Melanoma of the Vulva/Vagina	-13.399	790.576	-0.017	0.986	1
ABL1	Melanoma	factor(sample_subtypes)Ocular Melanoma	-13.669	1417.65	-0.01	0.992	1
ABL1	Melanoma	factor(sample_subtypes)others	-13.827	1055.87	-0.013	0.99	1
ABL1	Melanoma	factor(sample_subtypes)Uveal Melanoma	-1.887	2	-0.944	0.345	1
ABL1	Melanoma	factor(sample_all$sex)Male	0.507	0.242	2.097	0.036	0.385
ABL1	Melanoma	factor(sample_status)1	0.128	0.227	0.564	0.573	1
ABL1	Thyroid Cancer	factor(aya_status)1	-16.454	1997.73	-0.008	0.993	1
ABL1	Thyroid Cancer	TMB	0.063	0.041	1.536	0.125	0.873
ABL1	Thyroid Cancer	factor(sample_subtypes)Follicular Thyroid Cancer	-17.088	4292.13	-0.004	0.997	1
ABL1	Thyroid Cancer	factor(sample_subtypes)Hurthle Cell Thyroid Cancer	-17.479	3493.89	-0.005	0.996	1
ABL1	Thyroid Cancer	factor(sample_subtypes)Medullary Thyroid Cancer	-17.037	2587.68	-0.007	0.995	1
ABL1	Thyroid Cancer	factor(sample_subtypes)others	-17.062	7865.07	-0.002	0.998	1
ABL1	Thyroid Cancer	factor(sample_subtypes)Papillary Thyroid Cancer	-0.879	0.804	-1.093	0.274	1
ABL1	Thyroid Cancer	factor(sample_subtypes)Poorly Differentiated Thyroid Cancer	-1.159	1.195	-0.97	0.332	1
ABL1	Thyroid Cancer	factor(sample_all$sex)Male	0.177	0.724	0.245	0.807	1
ABL1	Thyroid Cancer	factor(sample_status)1	-1.555	1.119	-1.39	0.165	1
ABL1	Non-Small Cell Lung Cancer	factor(aya_status)1	0.605	0.608	0.995	0.32	1
ABL1	Non-Small Cell Lung Cancer	TMB	0.072	0.005	14.111	3.26e-45	2.13e-42
ABL1	Non-Small Cell Lung Cancer	factor(sample_subtypes)Large Cell Lung Carcinoma	-0.978	1793.64	-0.001	1	1
ABL1	Non-Small Cell Lung Cancer	factor(sample_subtypes)Large Cell Neuroendocrine Carcinoma	12.589	758.795	0.017	0.987	1
ABL1	Non-Small Cell Lung Cancer	factor(sample_subtypes)Lung Adenocarcinoma	13.899	758.794	0.018	0.985	1
ABL1	Non-Small Cell Lung Cancer	factor(sample_subtypes)Lung Adenosquamous Carcinoma	13.911	758.795	0.018	0.985	1
ABL1	Non-Small Cell Lung Cancer	factor(sample_subtypes)Lung Carcinoid	0.135	931.726	0	1	1
ABL1	Non-Small Cell Lung Cancer	factor(sample_subtypes)Lung Neuroendocrine Tumor	-0.859	1157.01	-0.001	0.999	1
ABL1	Non-Small Cell Lung Cancer	factor(sample_subtypes)Lung Squamous Cell Carcinoma	13.78	758.794	0.018	0.986	1
ABL1	Non-Small Cell Lung Cancer	factor(sample_subtypes)Non-Small Cell Lung Cancer	14.529	758.794	0.019	0.985	1
ABL1	Non-Small Cell Lung Cancer	factor(sample_subtypes)others	-0.161	1302.06	0	1	1
ABL1	Non-Small Cell Lung Cancer	factor(sample_subtypes)Pleomorphic Carcinoma of the Lung	14.633	758.794	0.019	0.985	1
ABL1	Non-Small Cell Lung Cancer	factor(sample_subtypes)Poorly Differentiated Non-Small Cell Lung Cancer	13.566	758.794	0.018	0.986	1
ABL1	Non-Small Cell Lung Cancer	factor(sample_subtypes)Sarcomatoid Carcinoma of the Lung	15.299	758.794	0.02	0.984	1
ABL1	Non-Small Cell Lung Cancer	factor(sample_all$sex)Male	0.311	0.161	1.926	0.0541	0.518
ABL1	Non-Small Cell Lung Cancer	factor(sample_status)1	0.121	0.16	0.755	0.45	1
ABL1	Ovarian Cancer	factor(aya_status)1	-14.462	920.36	-0.016	0.987	1
ABL1	Ovarian Cancer	TMB	0.106	0.029	3.646	0.000266	0.00537
ABL1	Ovarian Cancer	factor(sample_subtypes)Endometrioid Ovarian Cancer	-11.784	5.072	-2.323	0.0202	0.246
ABL1	Ovarian Cancer	factor(sample_subtypes)High-Grade Serous Fallopian Tube Cancer	1.352	1.453	0.93	0.352	1
ABL1	Ovarian Cancer	factor(sample_subtypes)High-Grade Serous Ovarian Cancer	1.059	1.07	0.991	0.322	1
ABL1	Ovarian Cancer	factor(sample_subtypes)Low-Grade Serous Ovarian Cancer	1.493	1.281	1.166	0.244	1
ABL1	Ovarian Cancer	factor(sample_subtypes)Mixed Ovarian Carcinoma	-16.787	2136.27	-0.008	0.994	1
ABL1	Ovarian Cancer	factor(sample_subtypes)Mucinous Ovarian Cancer	-14.809	1985.08	-0.007	0.994	1
ABL1	Ovarian Cancer	factor(sample_subtypes)others	2.343	1.464	1.6	0.11	0.813
ABL1	Ovarian Cancer	factor(sample_subtypes)Ovarian Cancer, Other	2.861	1.241	2.306	0.0211	0.255
ABL1	Ovarian Cancer	factor(sample_subtypes)Ovarian Carcinosarcoma/Malignant Mixed Mesodermal Tumor	-16.967	1348.98	-0.013	0.99	1
ABL1	Ovarian Cancer	factor(sample_subtypes)Ovarian Epithelial Tumor	-16.327	2032.1	-0.008	0.994	1
ABL1	Ovarian Cancer	factor(sample_subtypes)Serous Borderline Ovarian Tumor	-14.383	2831.41	-0.005	0.996	1
ABL1	Ovarian Cancer	factor(sample_subtypes)Serous Ovarian Cancer	2.037	1.195	1.704	0.0883	0.713
ABL1	Ovarian Cancer	factor(sample_subtypes)Small Cell Carcinoma of the Ovary	-14.113	3346.34	-0.004	0.997	1
ABL1	Ovarian Cancer	factor(sample_status)1	-0.064	0.372	-0.173	0.863	1
ABL1	Cancer of Unknown Primary	factor(aya_status)1	-25.84	647.676	-0.04	0.968	1
ABL1	Cancer of Unknown Primary	TMB	0.044	0.005	8.646	5.33e-18	4.38e-16
ABL1	Cancer of Unknown Primary	factor(sample_subtypes)Cancer of Unknown Primary	0.106	0.463	0.229	0.819	1
ABL1	Cancer of Unknown Primary	factor(sample_subtypes)Cancer of Unknown Primary, NOS	0.621	0.586	1.06	0.289	1
ABL1	Cancer of Unknown Primary	factor(sample_subtypes)Neuroendocrine Carcinoma, NOS	0.172	0.727	0.237	0.813	1
ABL1	Cancer of Unknown Primary	factor(sample_subtypes)Neuroendocrine Tumor, NOS	-0.214	0.794	-0.27	0.787	1
ABL1	Cancer of Unknown Primary	factor(sample_subtypes)others	-14.2	2073.32	-0.007	0.995	1
ABL1	Cancer of Unknown Primary	factor(sample_subtypes)Poorly Differentiated Carcinoma, NOS	0.875	0.482	1.817	0.0693	0.611
ABL1	Cancer of Unknown Primary	factor(sample_subtypes)Small Cell Carcinoma of Unknown Primary	1.104	0.8	1.381	0.167	1
ABL1	Cancer of Unknown Primary	factor(sample_subtypes)Squamous Cell Carcinoma, NOS	0.213	0.582	0.366	0.715	1
ABL1	Cancer of Unknown Primary	factor(sample_subtypes)Undifferentiated Malignant Neoplasm	0.29	0.823	0.353	0.724	1
ABL1	Cancer of Unknown Primary	factor(sample_all$sex)Male	0.064	0.299	0.214	0.831	1
ABL1	Cancer of Unknown Primary	factor(sample_all$sex)Unknown	11.456	6554.72	0.002	0.999	1
ABL1	Cancer of Unknown Primary	factor(sample_status)1	-0.085	0.325	-0.261	0.794	1
ABL1	Esophagogastric Cancer	factor(aya_status)1	0.611	0.62	0.984	0.325	1
ABL1	Esophagogastric Cancer	TMB	0.043	0.007	6.005	1.91e-09	8.21e-08
ABL1	Esophagogastric Cancer	factor(sample_subtypes)Diffuse Type Stomach Adenocarcinoma	-15.674	2022.55	-0.008	0.994	1
ABL1	Esophagogastric Cancer	factor(sample_subtypes)Esophageal Adenocarcinoma	-0.682	0.509	-1.34	0.18	1
ABL1	Esophagogastric Cancer	factor(sample_subtypes)Esophageal Poorly Differentiated Carcinoma	0.831	0.824	1.008	0.313	1
ABL1	Esophagogastric Cancer	factor(sample_subtypes)Esophageal Squamous Cell Carcinoma	-1.091	1.079	-1.012	0.312	1
ABL1	Esophagogastric Cancer	factor(sample_subtypes)Esophagogastric Adenocarcinoma	0.334	0.548	0.609	0.543	1
ABL1	Esophagogastric Cancer	factor(sample_subtypes)Intestinal Type Stomach Adenocarcinoma	1.02	0.851	1.199	0.231	1
ABL1	Esophagogastric Cancer	factor(sample_subtypes)others	-16.114	2127.13	-0.008	0.994	1
ABL1	Esophagogastric Cancer	factor(sample_subtypes)Poorly Differentiated Carcinoma of the Stomach	-16.069	1075.02	-0.015	0.988	1
ABL1	Esophagogastric Cancer	factor(sample_subtypes)Signet Ring Cell Carcinoma of the Stomach	-15.691	1233	-0.013	0.99	1
ABL1	Esophagogastric Cancer	factor(sample_subtypes)Stomach Adenocarcinoma	-0.344	0.503	-0.684	0.494	1
ABL1	Esophagogastric Cancer	factor(sample_subtypes)Tubular Stomach Adenocarcinoma	2.333	0.712	3.276	0.00105	0.0189
ABL1	Esophagogastric Cancer	factor(sample_all$sex)Male	0.027	0.366	0.074	0.941	1
ABL1	Esophagogastric Cancer	factor(sample_status)1	0.181	0.381	0.476	0.634	1
ABL1	Renal Cell Carcinoma	factor(aya_status)1	0.449	1.1	0.408	0.683	1
ABL1	Renal Cell Carcinoma	TMB	0.104	0.032	3.221	0.00128	0.0225
ABL1	Renal Cell Carcinoma	factor(sample_subtypes)Collecting Duct Renal Cell Carcinoma	-0.522	7525.26	0	1	1
ABL1	Renal Cell Carcinoma	factor(sample_subtypes)FH-Deficient Renal Cell Carcinoma	0.35	8038.59	0	1	1
ABL1	Renal Cell Carcinoma	factor(sample_subtypes)others	17.693	3201.1	0.006	0.996	1
ABL1	Renal Cell Carcinoma	factor(sample_subtypes)Papillary Renal Cell Carcinoma	18.169	3201.1	0.006	0.995	1
ABL1	Renal Cell Carcinoma	factor(sample_subtypes)Renal Angiomyolipoma	-0.162	6683.75	0	1	1
ABL1	Renal Cell Carcinoma	factor(sample_subtypes)Renal Cell Carcinoma	0.14	3712.89	0	1	1
ABL1	Renal Cell Carcinoma	factor(sample_subtypes)Renal Clear Cell Carcinoma	16.81	3201.1	0.005	0.996	1
ABL1	Renal Cell Carcinoma	factor(sample_subtypes)Renal Medullary Carcinoma	-0.148	7977.36	0	1	1
ABL1	Renal Cell Carcinoma	factor(sample_subtypes)Renal Non-Clear Cell Carcinoma	0.096	7094.47	0	1	1
ABL1	Renal Cell Carcinoma	factor(sample_subtypes)Renal Oncocytoma	18.525	3201.1	0.006	0.995	1
ABL1	Renal Cell Carcinoma	factor(sample_subtypes)Sarcomatoid Renal Cell Carcinoma	0.214	6907.73	0	1	1
ABL1	Renal Cell Carcinoma	factor(sample_subtypes)Translocation-Associated Renal Cell Carcinoma	0.023	5749.29	0	1	1
ABL1	Renal Cell Carcinoma	factor(sample_subtypes)Unclassified Renal Cell Carcinoma	15.899	3201.1	0.005	0.996	1
ABL1	Renal Cell Carcinoma	factor(sample_all$sex)Male	-1.205	0.619	-1.947	0.0515	0.499
ABL1	Renal Cell Carcinoma	factor(sample_status)1	-0.064	0.702	-0.091	0.928	1
ABL1	Hepatobiliary Cancer	factor(aya_status)1	-0.256	1.035	-0.248	0.804	1
ABL1	Hepatobiliary Cancer	TMB	0.056	0.013	4.386	1.16e-05	0.000298
ABL1	Hepatobiliary Cancer	factor(sample_subtypes)Extrahepatic Cholangiocarcinoma	-1.576	1.075	-1.465	0.143	0.94
ABL1	Hepatobiliary Cancer	factor(sample_subtypes)Fibrolamellar Carcinoma	-14.574	1017.58	-0.014	0.989	1
ABL1	Hepatobiliary Cancer	factor(sample_subtypes)Gallbladder Adenocarcinoma, NOS	0.039	0.818	0.047	0.962	1
ABL1	Hepatobiliary Cancer	factor(sample_subtypes)Gallbladder Cancer	-0.715	0.705	-1.015	0.31	1
ABL1	Hepatobiliary Cancer	factor(sample_subtypes)Hepatoblastoma	-14.867	1170.17	-0.013	0.99	1
ABL1	Hepatobiliary Cancer	factor(sample_subtypes)Hepatocellular Carcinoma	-1.402	0.734	-1.911	0.0561	0.53
ABL1	Hepatobiliary Cancer	factor(sample_subtypes)Hepatocellular Carcinoma plus Intrahepatic Cholangiocarcinoma	-0.265	1.082	-0.245	0.806	1
ABL1	Hepatobiliary Cancer	factor(sample_subtypes)Intrahepatic Cholangiocarcinoma	-0.244	0.484	-0.504	0.614	1
ABL1	Hepatobiliary Cancer	factor(sample_subtypes)others	0.61	1.116	0.547	0.585	1
ABL1	Hepatobiliary Cancer	factor(sample_subtypes)Perihilar Cholangiocarcinoma	-14.938	1453.3	-0.01	0.992	1
ABL1	Hepatobiliary Cancer	factor(sample_all$sex)Male	-0.034	0.389	-0.088	0.93	1
ABL1	Hepatobiliary Cancer	factor(sample_status)1	-0.033	0.425	-0.077	0.938	1
ABL1	Pancreatic Cancer	factor(aya_status)1	0.485	1.051	0.462	0.644	1
ABL1	Pancreatic Cancer	TMB	0.051	0.009	5.683	1.32e-08	5.17e-07
ABL1	Pancreatic Cancer	factor(sample_subtypes)Adenosquamous Carcinoma of the Pancreas	0.388	2062.28	0	1	1
ABL1	Pancreatic Cancer	factor(sample_subtypes)Intraductal Papillary Mucinous Neoplasm	0.556	2716.44	0	1	1
ABL1	Pancreatic Cancer	factor(sample_subtypes)others	0.625	3219.49	0	1	1
ABL1	Pancreatic Cancer	factor(sample_subtypes)Pancreatic Adenocarcinoma	14.875	1460.52	0.01	0.992	1
ABL1	Pancreatic Cancer	factor(sample_subtypes)Pancreatic Neuroendocrine Tumor	14.75	1460.52	0.01	0.992	1
ABL1	Pancreatic Cancer	factor(sample_subtypes)Solid Pseudopapillary Neoplasm of the Pancreas	0.366	2850.72	0	1	1
ABL1	Pancreatic Cancer	factor(sample_subtypes)Undifferentiated Carcinoma of the Pancreas	0.309	2390.51	0	1	1
ABL1	Pancreatic Cancer	factor(sample_all$sex)Male	0.131	0.409	0.319	0.75	1
ABL1	Pancreatic Cancer	factor(sample_status)1	0.54	0.409	1.322	0.186	1
ABL1	Mature B-Cell Neoplasms	factor(aya_status)1	-2.958	2.894	-1.022	0.307	1
ABL1	Mature B-Cell Neoplasms	TMB	0.072	0.029	2.489	0.0128	0.17
ABL1	Mature B-Cell Neoplasms	factor(sample_subtypes)Diffuse Large B-Cell Lymphoma, NOS	17.089	1836.85	0.009	0.993	1
ABL1	Mature B-Cell Neoplasms	factor(sample_subtypes)Follicular Lymphoma	17.163	1836.85	0.009	0.993	1
ABL1	Mature B-Cell Neoplasms	factor(sample_subtypes)Mantle Cell Lymphoma	18.132	1836.85	0.01	0.992	1
ABL1	Mature B-Cell Neoplasms	factor(sample_subtypes)Marginal Zone Lymphoma	-0.201	6962.24	0	1	1
ABL1	Mature B-Cell Neoplasms	factor(sample_subtypes)Mature B-Cell Neoplasms	17.896	1836.85	0.01	0.992	1
ABL1	Mature B-Cell Neoplasms	factor(sample_subtypes)others	17.63	1836.85	0.01	0.992	1
ABL1	Mature B-Cell Neoplasms	factor(sample_subtypes)Plasma Cell Myeloma	16.599	1836.85	0.009	0.993	1
ABL1	Mature B-Cell Neoplasms	factor(sample_all$sex)Male	-1.002	0.643	-1.558	0.119	0.852
ABL1	Mature B-Cell Neoplasms	factor(sample_status)1	-18.099	3653.9	-0.005	0.996	1
ABL1	Head and Neck Cancer	factor(aya_status)1	0.316	1.096	0.288	0.773	1
ABL1	Head and Neck Cancer	TMB	0.052	0.011	4.61	4.03e-06	0.000113
ABL1	Head and Neck Cancer	factor(sample_subtypes)Head and Neck Neuroendocrine Carcinoma	16.569	2196.24	0.008	0.994	1
ABL1	Head and Neck Cancer	factor(sample_subtypes)Head and Neck Squamous Cell Carcinoma	14.758	2196.24	0.007	0.995	1
ABL1	Head and Neck Cancer	factor(sample_subtypes)Head and Neck Squamous Cell Carcinoma of Unknown Primary	-1.986	2821.54	-0.001	0.999	1
ABL1	Head and Neck Cancer	factor(sample_subtypes)Hypopharynx Squamous Cell Carcinoma	-0.262	3369.9	0	1	1
ABL1	Head and Neck Cancer	factor(sample_subtypes)Larynx Squamous Cell Carcinoma	15.57	2196.24	0.007	0.994	1
ABL1	Head and Neck Cancer	factor(sample_subtypes)Nasopharyngeal Carcinoma	0.018	2634.55	0	1	1
ABL1	Head and Neck Cancer	factor(sample_subtypes)Oral Cavity Squamous Cell Carcinoma	15.003	2196.24	0.007	0.995	1
ABL1	Head and Neck Cancer	factor(sample_subtypes)Oropharynx Squamous Cell Carcinoma	13.87	2196.24	0.006	0.995	1
ABL1	Head and Neck Cancer	factor(sample_subtypes)others	15.745	2196.24	0.007	0.994	1
ABL1	Head and Neck Cancer	factor(sample_subtypes)Sinonasal Squamous Cell Carcinoma	16.318	2196.24	0.007	0.994	1
ABL1	Head and Neck Cancer	factor(sample_all$sex)Male	1.291	0.774	1.668	0.0953	0.748
ABL1	Head and Neck Cancer	factor(sample_status)1	-0.85	0.62	-1.371	0.17	1
ABL1	Endometrial Cancer	factor(aya_status)1	-0.261	0.648	-0.403	0.687	1
ABL1	Endometrial Cancer	TMB	0.012	0.001	11.459	2.11e-30	4.69e-28
ABL1	Endometrial Cancer	factor(sample_subtypes)others	0.085	0.82	0.104	0.917	1
ABL1	Endometrial Cancer	factor(sample_subtypes)Uterine Carcinosarcoma/Uterine Malignant Mixed Mullerian Tumor	-0.734	0.48	-1.53	0.126	0.877
ABL1	Endometrial Cancer	factor(sample_subtypes)Uterine Clear Cell Carcinoma	0.197	0.538	0.366	0.714	1
ABL1	Endometrial Cancer	factor(sample_subtypes)Uterine Dedifferentiated Carcinoma	-13.693	533.47	-0.026	0.98	1
ABL1	Endometrial Cancer	factor(sample_subtypes)Uterine Endometrioid Carcinoma	-0.062	0.287	-0.214	0.83	1
ABL1	Endometrial Cancer	factor(sample_subtypes)Uterine Mixed Endometrial Carcinoma	-0.381	0.584	-0.653	0.514	1
ABL1	Endometrial Cancer	factor(sample_subtypes)Uterine Serous Carcinoma/Uterine Papillary Serous Carcinoma	-1.651	0.568	-2.906	0.00366	0.0578
ABL1	Endometrial Cancer	factor(sample_subtypes)Uterine Undifferentiated Carcinoma	0.04	1.084	0.037	0.97	1
ABL1	Endometrial Cancer	factor(sample_status)1	-0.417	0.278	-1.501	0.133	0.905
ABL1	Salivary Gland Cancer	factor(aya_status)1	-17.562	5973.61	-0.003	0.998	1
ABL1	Salivary Gland Cancer	TMB	0.228	0.137	1.668	0.0954	0.748
ABL1	Salivary Gland Cancer	factor(sample_subtypes)Adenoid Cystic Carcinoma	18.384	8326.37	0.002	0.998	1
ABL1	Salivary Gland Cancer	factor(sample_subtypes)Mammary Analogue Secretory Carcinoma of Salivary Gland Origin	-0.279	13050.5	0	1	1
ABL1	Salivary Gland Cancer	factor(sample_subtypes)Mucoepidermoid Carcinoma	0.166	11391.2	0	1	1
ABL1	Salivary Gland Cancer	factor(sample_subtypes)Myoepithelial Carcinoma	0.322	13219.7	0	1	1
ABL1	Salivary Gland Cancer	factor(sample_subtypes)others	0.664	48910.1	0	1	1
ABL1	Salivary Gland Cancer	factor(sample_subtypes)Salivary Adenocarcinoma	-0.362	12578.3	0	1	1
ABL1	Salivary Gland Cancer	factor(sample_subtypes)Salivary Carcinoma	-4.481	10603.5	0	1	1
ABL1	Salivary Gland Cancer	factor(sample_subtypes)Salivary Carcinoma, Other	-0.134	11209.6	0	1	1
ABL1	Salivary Gland Cancer	factor(sample_subtypes)Salivary Duct Carcinoma	-5.259	8955.54	-0.001	1	1
ABL1	Salivary Gland Cancer	factor(sample_all$sex)Male	-0.811	0.892	-0.909	0.363	1
ABL1	Salivary Gland Cancer	factor(sample_status)1	1.333	1.112	1.199	0.23	1
ABL1	Mesothelioma	factor(aya_status)1	-16.819	4533.74	-0.004	0.997	1
ABL1	Mesothelioma	TMB	0.151	0.049	3.105	0.00191	0.0322
ABL1	Mesothelioma	factor(sample_subtypes)Peritoneal Mesothelioma	17.067	10726.2	0.002	0.999	1
ABL1	Mesothelioma	factor(sample_subtypes)Pleural Mesothelioma	16.339	10726.2	0.002	0.999	1
ABL1	Mesothelioma	factor(sample_subtypes)Pleural Mesothelioma, Biphasic Type	-0.472	11184.3	0	1	1
ABL1	Mesothelioma	factor(sample_subtypes)Pleural Mesothelioma, Epithelioid Type	16.823	10726.2	0.002	0.999	1
ABL1	Mesothelioma	factor(sample_subtypes)Pleural Mesothelioma, Sarcomatoid Type	-0.24	11898.2	0	1	1
ABL1	Mesothelioma	factor(sample_all$sex)Male	0.265	1.003	0.265	0.791	1
ABL1	Mesothelioma	factor(sample_status)1	0.28	1.122	0.25	0.803	1
ABL1	Skin Cancer, Non-Melanoma	factor(aya_status)1	-0.17	1.109	-0.153	0.878	1
ABL1	Skin Cancer, Non-Melanoma	TMB	0.015	0.004	3.783	0.000155	0.00326
ABL1	Skin Cancer, Non-Melanoma	factor(sample_subtypes)Basal Cell Carcinoma	0.818	1.149	0.712	0.476	1
ABL1	Skin Cancer, Non-Melanoma	factor(sample_subtypes)Cutaneous Squamous Cell Carcinoma	1.043	1.114	0.936	0.35	1
ABL1	Skin Cancer, Non-Melanoma	factor(sample_subtypes)Dermatofibrosarcoma Protuberans	-16.148	2290.88	-0.007	0.994	1
ABL1	Skin Cancer, Non-Melanoma	factor(sample_subtypes)Extramammary Paget Disease	-16.239	1353.41	-0.012	0.99	1
ABL1	Skin Cancer, Non-Melanoma	factor(sample_subtypes)Merkel Cell Carcinoma	0.341	1.115	0.306	0.76	1
ABL1	Skin Cancer, Non-Melanoma	factor(sample_subtypes)others	-16.051	2288.52	-0.007	0.994	1
ABL1	Skin Cancer, Non-Melanoma	factor(sample_subtypes)Sebaceous Carcinoma	-16.137	2143.36	-0.008	0.994	1
ABL1	Skin Cancer, Non-Melanoma	factor(sample_subtypes)Skin Adnexal Carcinoma	0.091	1.486	0.061	0.951	1
ABL1	Skin Cancer, Non-Melanoma	factor(sample_all$sex)Male	-0.144	0.354	-0.408	0.683	1
ABL1	Skin Cancer, Non-Melanoma	factor(sample_status)1	-0.261	0.314	-0.831	0.406	1
ABL1	Bladder Cancer	factor(aya_status)1	1.048	0.767	1.366	0.172	1
ABL1	Bladder Cancer	TMB	0.016	0.003	4.611	4.02e-06	0.000112
ABL1	Bladder Cancer	factor(sample_subtypes)Bladder Squamous Cell Carcinoma	1.083	1.041	1.04	0.298	1
ABL1	Bladder Cancer	factor(sample_subtypes)Bladder Urothelial Carcinoma	-0.531	0.743	-0.715	0.475	1
ABL1	Bladder Cancer	factor(sample_subtypes)others	-15.227	949.353	-0.016	0.987	1
ABL1	Bladder Cancer	factor(sample_subtypes)Plasmacytoid/Signet Ring Cell Bladder Carcinoma	-15.329	1568.74	-0.01	0.992	1
ABL1	Bladder Cancer	factor(sample_subtypes)Small Cell Bladder Cancer	-0.034	1.25	-0.027	0.978	1
ABL1	Bladder Cancer	factor(sample_subtypes)Upper Tract Urothelial Carcinoma	-0.846	0.837	-1.01	0.312	1
ABL1	Bladder Cancer	factor(sample_subtypes)Urethral Urothelial Carcinoma	-15.416	1073.89	-0.014	0.989	1
ABL1	Bladder Cancer	factor(sample_all$sex)Male	0.051	0.327	0.156	0.876	1
ABL1	Bladder Cancer	factor(sample_status)1	-0.809	0.442	-1.831	0.0671	0.598
AKT1	Glioma	factor(aya_status)1	-1.116	0.584	-1.91	0.0561	0.531
AKT1	Glioma	TMB	0.02	0.002	10.031	1.11e-23	1.42e-21
AKT1	Glioma	factor(sample_subtypes)Anaplastic Oligoastrocytoma	-0.507	4439.15	0	1	1
AKT1	Glioma	factor(sample_subtypes)Anaplastic Oligodendroglioma	16.294	1442.2	0.011	0.991	1
AKT1	Glioma	factor(sample_subtypes)Anaplastic Pleomorphic Xanthoastrocytoma	0.41	6439.58	0	1	1
AKT1	Glioma	factor(sample_subtypes)Astrocytoma	16.978	1442.2	0.012	0.991	1
AKT1	Glioma	factor(sample_subtypes)Diffuse Astrocytoma	17.757	1442.2	0.012	0.99	1
AKT1	Glioma	factor(sample_subtypes)Diffuse Glioma	17.437	1442.2	0.012	0.99	1
AKT1	Glioma	factor(sample_subtypes)Diffuse Intrinsic Pontine Glioma	-0.046	4083.08	0	1	1
AKT1	Glioma	factor(sample_subtypes)Dysembryoplastic Neuroepithelial Tumor	0.045	6814.49	0	1	1
AKT1	Glioma	factor(sample_subtypes)Encapsulated Glioma	0.13	5658.44	0	1	1
AKT1	Glioma	factor(sample_subtypes)Ependymoma	0.049	3432.22	0	1	1
AKT1	Glioma	factor(sample_subtypes)Ganglioglioma	0.154	3309.16	0	1	1
AKT1	Glioma	factor(sample_subtypes)Glioblastoma	16.823	1442.2	0.012	0.991	1
AKT1	Glioma	factor(sample_subtypes)Glioblastoma Multiforme	15.916	1442.2	0.011	0.991	1
AKT1	Glioma	factor(sample_subtypes)Glioma, NOS	0.084	3532.53	0	1	1
AKT1	Glioma	factor(sample_subtypes)Gliosarcoma	-0.227	4141.91	0	1	1
AKT1	Glioma	factor(sample_subtypes)High-Grade Glioma, NOS	16.312	1442.2	0.011	0.991	1
AKT1	Glioma	factor(sample_subtypes)Low-Grade Glioma, NOS	0.039	2667.45	0	1	1
AKT1	Glioma	factor(sample_subtypes)Oligoastrocytoma	-0.028	5989.97	0	1	1
AKT1	Glioma	factor(sample_subtypes)Oligodendroglioma	15.762	1442.2	0.011	0.991	1
AKT1	Glioma	factor(sample_subtypes)others	0.087	6494.45	0	1	1
AKT1	Glioma	factor(sample_subtypes)Pilocytic Astrocytoma	0	2476.61	0	1	1
AKT1	Glioma	factor(sample_subtypes)Pilomyxoid Astrocytoma	-0.172	7356.77	0	1	1
AKT1	Glioma	factor(sample_subtypes)Pleomorphic Xanthoastrocytoma	0.075	6052.29	0	1	1
AKT1	Glioma	factor(sample_all$sex)Male	0.065	0.351	0.184	0.854	1
AKT1	Glioma	factor(sample_status)1	1.028	0.441	2.333	0.0196	0.241
AKT1	Breast Cancer	factor(aya_status)1	-0.492	0.2	-2.459	0.0139	0.183
AKT1	Breast Cancer	TMB	0.009	0.005	2.009	0.0446	0.45
AKT1	Breast Cancer	factor(sample_subtypes)Breast Invasive Cancer, NOS	-0.326	1.132	-0.288	0.773	1
AKT1	Breast Cancer	factor(sample_subtypes)Breast Invasive Carcinoma, NOS	1.071	1.033	1.036	0.3	1
AKT1	Breast Cancer	factor(sample_subtypes)Breast Invasive Ductal Carcinoma	0.746	1.015	0.735	0.462	1
AKT1	Breast Cancer	factor(sample_subtypes)Breast Invasive Lobular Carcinoma	0.829	1.024	0.81	0.418	1
AKT1	Breast Cancer	factor(sample_subtypes)Breast Invasive Mixed Mucinous Carcinoma	0.6	1.438	0.417	0.676	1
AKT1	Breast Cancer	factor(sample_subtypes)Breast Mixed Ductal and Lobular Carcinoma	0.507	1.063	0.477	0.633	1
AKT1	Breast Cancer	factor(sample_subtypes)Invasive Breast Carcinoma	0.644	1.02	0.631	0.528	1
AKT1	Breast Cancer	factor(sample_subtypes)Metaplastic Breast Cancer	-0.008	1.432	-0.006	0.995	1
AKT1	Breast Cancer	factor(sample_subtypes)others	-0.54	1.428	-0.378	0.706	1
AKT1	Breast Cancer	factor(sample_all$sex)Male	-1.335	1.007	-1.325	0.185	1
AKT1	Breast Cancer	factor(sample_status)1	0.205	0.109	1.885	0.0594	0.552
AKT1	Colorectal Cancer	factor(aya_status)1	-0.172	0.297	-0.581	0.561	1
AKT1	Colorectal Cancer	TMB	0.017	0.002	10.715	8.63e-27	1.45e-24
AKT1	Colorectal Cancer	factor(sample_subtypes)Colorectal Adenocarcinoma	-0.029	0.265	-0.109	0.913	1
AKT1	Colorectal Cancer	factor(sample_subtypes)Mucinous Adenocarcinoma of the Colon and Rectum	1.104	0.313	3.522	0.000428	0.00829
AKT1	Colorectal Cancer	factor(sample_subtypes)others	1.225	0.66	1.857	0.0633	0.576
AKT1	Colorectal Cancer	factor(sample_subtypes)Rectal Adenocarcinoma	-1.145	0.36	-3.183	0.00146	0.0254
AKT1	Colorectal Cancer	factor(sample_subtypes)Signet Ring Cell Adenocarcinoma of the Colon and Rectum	-0.12	1.119	-0.107	0.915	1
AKT1	Colorectal Cancer	factor(sample_all$sex)Male	-0.336	0.176	-1.911	0.056	0.53
AKT1	Colorectal Cancer	factor(sample_status)1	-0.861	0.238	-3.624	0.00029	0.0058
AKT1	Soft Tissue Sarcoma	factor(aya_status)1	-17.783	2825.79	-0.006	0.995	1
AKT1	Soft Tissue Sarcoma	TMB	0.045	0.015	2.981	0.00287	0.0465
AKT1	Soft Tissue Sarcoma	factor(sample_subtypes)Alveolar Soft Part Sarcoma	0.459	17522.5	0	1	1
AKT1	Soft Tissue Sarcoma	factor(sample_subtypes)Angiosarcoma	18.117	11168.7	0.002	0.999	1
AKT1	Soft Tissue Sarcoma	factor(sample_subtypes)Clear Cell Sarcoma	0.329	17848.1	0	1	1
AKT1	Soft Tissue Sarcoma	factor(sample_subtypes)Dedifferentiated Liposarcoma	-0.365	12246.6	0	1	1
AKT1	Soft Tissue Sarcoma	factor(sample_subtypes)Desmoid/Aggressive Fibromatosis	0.03	14353.6	0	1	1
AKT1	Soft Tissue Sarcoma	factor(sample_subtypes)Desmoplastic Small-Round-Cell Tumor	0.814	13645	0	1	1
AKT1	Soft Tissue Sarcoma	factor(sample_subtypes)Embryonal Rhabdomyosarcoma	-0.318	14584.5	0	1	1
AKT1	Soft Tissue Sarcoma	factor(sample_subtypes)Epithelioid Hemangioendothelioma	-0.073	16152.5	0	1	1
AKT1	Soft Tissue Sarcoma	factor(sample_subtypes)Epithelioid Sarcoma	-0.024	16160.8	0	1	1
AKT1	Soft Tissue Sarcoma	factor(sample_subtypes)Follicular Dendritic Cell Sarcoma	-0.478	23228.4	0	1	1
AKT1	Soft Tissue Sarcoma	factor(sample_subtypes)Hemangioma	-0.079	13221.8	0	1	1
AKT1	Soft Tissue Sarcoma	factor(sample_subtypes)Inflammatory Myofibroblastic Tumor	-0.201	19643.6	0	1	1
AKT1	Soft Tissue Sarcoma	factor(sample_subtypes)Intimal Sarcoma	-0.109	19540.7	0	1	1
AKT1	Soft Tissue Sarcoma	factor(sample_subtypes)Leiomyosarcoma	17.236	11168.7	0.002	0.999	1
AKT1	Soft Tissue Sarcoma	factor(sample_subtypes)Liposarcoma	-0.326	19003	0	1	1
AKT1	Soft Tissue Sarcoma	factor(sample_subtypes)Myxofibrosarcoma	-0.51	14486.4	0	1	1
AKT1	Soft Tissue Sarcoma	factor(sample_subtypes)Myxoid/Round-Cell Liposarcoma	20.391	11168.7	0.002	0.999	1
AKT1	Soft Tissue Sarcoma	factor(sample_subtypes)others	-0.189	13150.9	0	1	1
AKT1	Soft Tissue Sarcoma	factor(sample_subtypes)Perivascular Epithelioid Cell Tumor	-0.409	16631.4	0	1	1
AKT1	Soft Tissue Sarcoma	factor(sample_subtypes)Pleomorphic Liposarcoma	-0.335	16740.8	0	1	1
AKT1	Soft Tissue Sarcoma	factor(sample_subtypes)Radiation-Associated Sarcoma	-0.755	22250.5	0	1	1
AKT1	Soft Tissue Sarcoma	factor(sample_subtypes)Rhabdomyosarcoma	0.004	14635	0	1	1
AKT1	Soft Tissue Sarcoma	factor(sample_subtypes)Round Cell Sarcoma, NOS	-0.144	16369.8	0	1	1
AKT1	Soft Tissue Sarcoma	factor(sample_subtypes)Sarcoma, NOS	17.606	11168.7	0.002	0.999	1
AKT1	Soft Tissue Sarcoma	factor(sample_subtypes)Soft Tissue Myoepithelial Carcinoma	-0.304	21302.1	0	1	1
AKT1	Soft Tissue Sarcoma	factor(sample_subtypes)Solitary Fibrous Tumor/Hemangiopericytoma	-0.421	13761.5	0	1	1
AKT1	Soft Tissue Sarcoma	factor(sample_subtypes)Synovial Sarcoma	0.374	12749.8	0	1	1
AKT1	Soft Tissue Sarcoma	factor(sample_subtypes)Undifferentiated Pleomorphic Sarcoma/Malignant Fibrous Histiocytoma/High-Grade Spindle Cell Sarcoma	17.845	11168.7	0.002	0.999	1
AKT1	Soft Tissue Sarcoma	factor(sample_subtypes)Well-Differentiated Liposarcoma	-0.386	14126.8	0	1	1
AKT1	Soft Tissue Sarcoma	factor(sample_all$sex)Male	-0.45	0.699	-0.643	0.52	1
AKT1	Soft Tissue Sarcoma	factor(sample_status)1	0.017	0.744	0.023	0.981	1
AKT1	Melanoma	factor(aya_status)1	-0.329	0.766	-0.429	0.668	1
AKT1	Melanoma	TMB	0.015	0.003	4.77	1.84e-06	5.47e-05
AKT1	Melanoma	factor(sample_subtypes)Anorectal Mucosal Melanoma	14.947	951.381	0.016	0.987	1
AKT1	Melanoma	factor(sample_subtypes)Cutaneous Melanoma	15.117	951.381	0.016	0.987	1
AKT1	Melanoma	factor(sample_subtypes)Desmoplastic Melanoma	15.915	951.381	0.017	0.987	1
AKT1	Melanoma	factor(sample_subtypes)Head and Neck Mucosal Melanoma	-0.017	1555.14	0	1	1
AKT1	Melanoma	factor(sample_subtypes)Melanoma	15.099	951.381	0.016	0.987	1
AKT1	Melanoma	factor(sample_subtypes)Melanoma of Unknown Primary	14.536	951.381	0.015	0.988	1
AKT1	Melanoma	factor(sample_subtypes)Mucosal Melanoma of the Vulva/Vagina	15.529	951.381	0.016	0.987	1
AKT1	Melanoma	factor(sample_subtypes)Ocular Melanoma	-0.035	2525.73	0	1	1
AKT1	Melanoma	factor(sample_subtypes)others	-0.13	1999.36	0	1	1
AKT1	Melanoma	factor(sample_subtypes)Uveal Melanoma	14	951.381	0.015	0.988	1
AKT1	Melanoma	factor(sample_all$sex)Male	0.381	0.399	0.954	0.34	1
AKT1	Melanoma	factor(sample_status)1	-0.158	0.355	-0.445	0.656	1
AKT1	Thyroid Cancer	factor(aya_status)1	0.454	0.704	0.645	0.519	1
AKT1	Thyroid Cancer	TMB	0.046	0.08	0.574	0.566	1
AKT1	Thyroid Cancer	factor(sample_subtypes)Follicular Thyroid Cancer	-17.756	4521.6	-0.004	0.997	1
AKT1	Thyroid Cancer	factor(sample_subtypes)Hurthle Cell Thyroid Cancer	-17.651	3568.58	-0.005	0.996	1
AKT1	Thyroid Cancer	factor(sample_subtypes)Medullary Thyroid Cancer	-17.667	2734.19	-0.006	0.995	1
AKT1	Thyroid Cancer	factor(sample_subtypes)others	-17.451	8064.15	-0.002	0.998	1
AKT1	Thyroid Cancer	factor(sample_subtypes)Papillary Thyroid Cancer	-0.401	0.743	-0.539	0.59	1
AKT1	Thyroid Cancer	factor(sample_subtypes)Poorly Differentiated Thyroid Cancer	-17.725	2213.07	-0.008	0.994	1
AKT1	Thyroid Cancer	factor(sample_all$sex)Male	0.291	0.579	0.503	0.615	1
AKT1	Thyroid Cancer	factor(sample_status)1	-0.61	0.675	-0.903	0.367	1
AKT1	Non-Small Cell Lung Cancer	factor(aya_status)1	0.487	0.733	0.665	0.506	1
AKT1	Non-Small Cell Lung Cancer	TMB	0.045	0.007	6.152	7.65e-10	3.41e-08
AKT1	Non-Small Cell Lung Cancer	factor(sample_subtypes)Large Cell Lung Carcinoma	-0.593	3012.96	0	1	1
AKT1	Non-Small Cell Lung Cancer	factor(sample_subtypes)Large Cell Neuroendocrine Carcinoma	15.974	1256.43	0.013	0.99	1
AKT1	Non-Small Cell Lung Cancer	factor(sample_subtypes)Lung Adenocarcinoma	14.457	1256.43	0.012	0.991	1
AKT1	Non-Small Cell Lung Cancer	factor(sample_subtypes)Lung Adenosquamous Carcinoma	-0.247	1803.14	0	1	1
AKT1	Non-Small Cell Lung Cancer	factor(sample_subtypes)Lung Carcinoid	15.302	1256.43	0.012	0.99	1
AKT1	Non-Small Cell Lung Cancer	factor(sample_subtypes)Lung Neuroendocrine Tumor	15.329	1256.43	0.012	0.99	1
AKT1	Non-Small Cell Lung Cancer	factor(sample_subtypes)Lung Squamous Cell Carcinoma	14.402	1256.43	0.011	0.991	1
AKT1	Non-Small Cell Lung Cancer	factor(sample_subtypes)Non-Small Cell Lung Cancer	13.682	1256.43	0.011	0.991	1
AKT1	Non-Small Cell Lung Cancer	factor(sample_subtypes)others	15.827	1256.43	0.013	0.99	1
AKT1	Non-Small Cell Lung Cancer	factor(sample_subtypes)Pleomorphic Carcinoma of the Lung	-0.431	1950.24	0	1	1
AKT1	Non-Small Cell Lung Cancer	factor(sample_subtypes)Poorly Differentiated Non-Small Cell Lung Cancer	-0.686	1483.72	0	1	1
AKT1	Non-Small Cell Lung Cancer	factor(sample_subtypes)Sarcomatoid Carcinoma of the Lung	-0.32	2010.52	0	1	1
AKT1	Non-Small Cell Lung Cancer	factor(sample_all$sex)Male	0.145	0.224	0.648	0.517	1
AKT1	Non-Small Cell Lung Cancer	factor(sample_status)1	-0.131	0.228	-0.578	0.563	1
AKT1	Ovarian Cancer	factor(aya_status)1	-0.012	0.859	-0.015	0.988	1
AKT1	Ovarian Cancer	TMB	0.013	0.005	2.755	0.00588	0.0876
AKT1	Ovarian Cancer	factor(sample_subtypes)Endometrioid Ovarian Cancer	0.883	0.591	1.492	0.136	0.913
AKT1	Ovarian Cancer	factor(sample_subtypes)High-Grade Serous Fallopian Tube Cancer	-16.8	2089.41	-0.008	0.994	1
AKT1	Ovarian Cancer	factor(sample_subtypes)High-Grade Serous Ovarian Cancer	-1.213	0.572	-2.122	0.0339	0.368
AKT1	Ovarian Cancer	factor(sample_subtypes)Low-Grade Serous Ovarian Cancer	-16.779	1307	-0.013	0.99	1
AKT1	Ovarian Cancer	factor(sample_subtypes)Mixed Ovarian Carcinoma	-16.856	2555.64	-0.007	0.995	1
AKT1	Ovarian Cancer	factor(sample_subtypes)Mucinous Ovarian Cancer	-16.814	2181.9	-0.008	0.994	1
AKT1	Ovarian Cancer	factor(sample_subtypes)others	-16.79	3040.57	-0.006	0.996	1
AKT1	Ovarian Cancer	factor(sample_subtypes)Ovarian Cancer, Other	-16.964	3140.21	-0.005	0.996	1
AKT1	Ovarian Cancer	factor(sample_subtypes)Ovarian Carcinosarcoma/Malignant Mixed Mesodermal Tumor	-0.934	1.117	-0.836	0.403	1
AKT1	Ovarian Cancer	factor(sample_subtypes)Ovarian Epithelial Tumor	0.85	0.768	1.107	0.268	1
AKT1	Ovarian Cancer	factor(sample_subtypes)Serous Borderline Ovarian Tumor	-16.787	2996.81	-0.006	0.996	1
AKT1	Ovarian Cancer	factor(sample_subtypes)Serous Ovarian Cancer	-0.861	1.117	-0.771	0.441	1
AKT1	Ovarian Cancer	factor(sample_subtypes)Small Cell Carcinoma of the Ovary	-16.785	3696.48	-0.005	0.996	1
AKT1	Ovarian Cancer	factor(sample_status)1	-0.012	0.394	-0.029	0.976	1
AKT1	Cancer of Unknown Primary	factor(aya_status)1	-19.126	760.98	-0.025	0.98	1
AKT1	Cancer of Unknown Primary	TMB	0.025	0.005	5.229	1.7e-07	5.87e-06
AKT1	Cancer of Unknown Primary	factor(sample_subtypes)Cancer of Unknown Primary	0.321	0.483	0.664	0.507	1
AKT1	Cancer of Unknown Primary	factor(sample_subtypes)Cancer of Unknown Primary, NOS	0.297	0.699	0.425	0.671	1
AKT1	Cancer of Unknown Primary	factor(sample_subtypes)Neuroendocrine Carcinoma, NOS	0.896	0.631	1.42	0.156	0.984
AKT1	Cancer of Unknown Primary	factor(sample_subtypes)Neuroendocrine Tumor, NOS	-0.053	0.801	-0.066	0.947	1
AKT1	Cancer of Unknown Primary	factor(sample_subtypes)others	2.4	1.142	2.1	0.0357	0.383
AKT1	Cancer of Unknown Primary	factor(sample_subtypes)Poorly Differentiated Carcinoma, NOS	0.755	0.537	1.406	0.16	0.998
AKT1	Cancer of Unknown Primary	factor(sample_subtypes)Small Cell Carcinoma of Unknown Primary	-15.539	1409.04	-0.011	0.991	1
AKT1	Cancer of Unknown Primary	factor(sample_subtypes)Squamous Cell Carcinoma, NOS	1.29	0.509	2.533	0.0113	0.153
AKT1	Cancer of Unknown Primary	factor(sample_subtypes)Undifferentiated Malignant Neoplasm	-15.008	1056.47	-0.014	0.989	1
AKT1	Cancer of Unknown Primary	factor(sample_all$sex)Male	-0.415	0.317	-1.306	0.191	1
AKT1	Cancer of Unknown Primary	factor(sample_all$sex)Unknown	18.805	10832.5	0.002	0.999	1
AKT1	Cancer of Unknown Primary	factor(sample_status)1	-0.196	0.336	-0.584	0.559	1
AKT1	Esophagogastric Cancer	factor(aya_status)1	0.512	1.058	0.484	0.629	1
AKT1	Esophagogastric Cancer	TMB	0.046	0.009	5.009	5.48e-07	1.75e-05
AKT1	Esophagogastric Cancer	factor(sample_subtypes)Diffuse Type Stomach Adenocarcinoma	1.918	1.251	1.533	0.125	0.875
AKT1	Esophagogastric Cancer	factor(sample_subtypes)Esophageal Adenocarcinoma	-0.717	0.94	-0.763	0.446	1
AKT1	Esophagogastric Cancer	factor(sample_subtypes)Esophageal Poorly Differentiated Carcinoma	-16.354	4397.33	-0.004	0.997	1
AKT1	Esophagogastric Cancer	factor(sample_subtypes)Esophageal Squamous Cell Carcinoma	-16.359	2418.87	-0.007	0.995	1
AKT1	Esophagogastric Cancer	factor(sample_subtypes)Esophagogastric Adenocarcinoma	0.776	0.919	0.844	0.399	1
AKT1	Esophagogastric Cancer	factor(sample_subtypes)Intestinal Type Stomach Adenocarcinoma	-16.652	5280.03	-0.003	0.997	1
AKT1	Esophagogastric Cancer	factor(sample_subtypes)others	-16.81	5762.75	-0.003	0.998	1
AKT1	Esophagogastric Cancer	factor(sample_subtypes)Poorly Differentiated Carcinoma of the Stomach	-16.779	2902.52	-0.006	0.995	1
AKT1	Esophagogastric Cancer	factor(sample_subtypes)Signet Ring Cell Carcinoma of the Stomach	-16.311	3353.2	-0.005	0.996	1
AKT1	Esophagogastric Cancer	factor(sample_subtypes)Stomach Adenocarcinoma	0.21	0.851	0.246	0.805	1
AKT1	Esophagogastric Cancer	factor(sample_subtypes)Tubular Stomach Adenocarcinoma	2.665	1.058	2.52	0.0117	0.158
AKT1	Esophagogastric Cancer	factor(sample_all$sex)Male	0.19	0.587	0.324	0.746	1
AKT1	Esophagogastric Cancer	factor(sample_status)1	-0.008	0.672	-0.012	0.99	1
AKT1	Renal Cell Carcinoma	factor(aya_status)1	-16.815	3646.9	-0.005	0.996	1
AKT1	Renal Cell Carcinoma	TMB	0.109	0.05	2.192	0.0284	0.322
AKT1	Renal Cell Carcinoma	factor(sample_subtypes)Collecting Duct Renal Cell Carcinoma	-0.362	12693.2	0	1	1
AKT1	Renal Cell Carcinoma	factor(sample_subtypes)FH-Deficient Renal Cell Carcinoma	0.181	12691.6	0	1	1
AKT1	Renal Cell Carcinoma	factor(sample_subtypes)others	18.136	5162.45	0.004	0.997	1
AKT1	Renal Cell Carcinoma	factor(sample_subtypes)Papillary Renal Cell Carcinoma	-0.128	6538.45	0	1	1
AKT1	Renal Cell Carcinoma	factor(sample_subtypes)Renal Angiomyolipoma	-0.087	10781.4	0	1	1
AKT1	Renal Cell Carcinoma	factor(sample_subtypes)Renal Cell Carcinoma	17.008	5162.45	0.003	0.997	1
AKT1	Renal Cell Carcinoma	factor(sample_subtypes)Renal Clear Cell Carcinoma	17.612	5162.45	0.003	0.997	1
AKT1	Renal Cell Carcinoma	factor(sample_subtypes)Renal Medullary Carcinoma	1.35	12058.9	0	1	1
AKT1	Renal Cell Carcinoma	factor(sample_subtypes)Renal Non-Clear Cell Carcinoma	0.046	11415.5	0	1	1
AKT1	Renal Cell Carcinoma	factor(sample_subtypes)Renal Oncocytoma	18.757	5162.45	0.004	0.997	1
AKT1	Renal Cell Carcinoma	factor(sample_subtypes)Sarcomatoid Renal Cell Carcinoma	-0.155	11229.9	0	1	1
AKT1	Renal Cell Carcinoma	factor(sample_subtypes)Translocation-Associated Renal Cell Carcinoma	0.498	9097.91	0	1	1
AKT1	Renal Cell Carcinoma	factor(sample_subtypes)Unclassified Renal Cell Carcinoma	-1.623	6334.59	0	1	1
AKT1	Renal Cell Carcinoma	factor(sample_all$sex)Male	-0.256	0.708	-0.362	0.718	1
AKT1	Renal Cell Carcinoma	factor(sample_status)1	-1.541	1.082	-1.425	0.154	0.979
AKT1	Hepatobiliary Cancer	factor(aya_status)1	-16.875	6164.77	-0.003	0.998	1
AKT1	Hepatobiliary Cancer	TMB	0.086	0.026	3.311	0.00093	0.0168
AKT1	Hepatobiliary Cancer	factor(sample_subtypes)Extrahepatic Cholangiocarcinoma	1.062	0.991	1.072	0.284	1
AKT1	Hepatobiliary Cancer	factor(sample_subtypes)Fibrolamellar Carcinoma	-16.108	10314.7	-0.002	0.999	1
AKT1	Hepatobiliary Cancer	factor(sample_subtypes)Gallbladder Adenocarcinoma, NOS	-18.859	9137.39	-0.002	0.998	1
AKT1	Hepatobiliary Cancer	factor(sample_subtypes)Gallbladder Cancer	-0.246	1.072	-0.23	0.818	1
AKT1	Hepatobiliary Cancer	factor(sample_subtypes)Hepatoblastoma	-17.545	13481.4	-0.001	0.999	1
AKT1	Hepatobiliary Cancer	factor(sample_subtypes)Hepatocellular Carcinoma	-19.113	3670.32	-0.005	0.996	1
AKT1	Hepatobiliary Cancer	factor(sample_subtypes)Hepatocellular Carcinoma plus Intrahepatic Cholangiocarcinoma	-18.459	11109.7	-0.002	0.999	1
AKT1	Hepatobiliary Cancer	factor(sample_subtypes)Intrahepatic Cholangiocarcinoma	-18.717	3106.99	-0.006	0.995	1
AKT1	Hepatobiliary Cancer	factor(sample_subtypes)others	-18.787	18529.4	-0.001	0.999	1
AKT1	Hepatobiliary Cancer	factor(sample_subtypes)Perihilar Cholangiocarcinoma	-18.285	16737.2	-0.001	0.999	1
AKT1	Hepatobiliary Cancer	factor(sample_all$sex)Male	-2.272	1.228	-1.851	0.0642	0.582
AKT1	Hepatobiliary Cancer	factor(sample_status)1	0.044	0.912	0.048	0.961	1
AKT1	Cervical Cancer	factor(aya_status)1	-17.324	2711.63	-0.006	0.995	1
AKT1	Cervical Cancer	TMB	0.082	0.045	1.819	0.0688	0.609
AKT1	Cervical Cancer	factor(sample_subtypes)Cervical Adenosquamous Carcinoma	18	5734.02	0.003	0.997	1
AKT1	Cervical Cancer	factor(sample_subtypes)Cervical Squamous Cell Carcinoma	17.296	5734.02	0.003	0.998	1
AKT1	Cervical Cancer	factor(sample_subtypes)Endocervical Adenocarcinoma	17.722	5734.02	0.003	0.998	1
AKT1	Cervical Cancer	factor(sample_subtypes)Gastric Type Mucinous Carcinoma	0.057	7680.04	0	1	1
AKT1	Cervical Cancer	factor(sample_subtypes)others	0.413	6620.27	0	1	1
AKT1	Cervical Cancer	factor(sample_all$sex)Male	-0.442	20859.3	0	1	1
AKT1	Cervical Cancer	factor(sample_status)1	-0.184	0.894	-0.206	0.837	1
AKT1	Pancreatic Cancer	factor(aya_status)1	-16.158	3939.8	-0.004	0.997	1
AKT1	Pancreatic Cancer	TMB	0.054	0.013	4.135	3.56e-05	0.00084
AKT1	Pancreatic Cancer	factor(sample_subtypes)Adenosquamous Carcinoma of the Pancreas	0.445	9100.6	0	1	1
AKT1	Pancreatic Cancer	factor(sample_subtypes)Intraductal Papillary Mucinous Neoplasm	0.702	12056.1	0	1	1
AKT1	Pancreatic Cancer	factor(sample_subtypes)others	1.012	14206.6	0	1	1
AKT1	Pancreatic Cancer	factor(sample_subtypes)Pancreatic Adenocarcinoma	17.465	6385.77	0.003	0.998	1
AKT1	Pancreatic Cancer	factor(sample_subtypes)Pancreatic Neuroendocrine Tumor	-7.969	6513.81	-0.001	0.999	1
AKT1	Pancreatic Cancer	factor(sample_subtypes)Solid Pseudopapillary Neoplasm of the Pancreas	0.86	12407.7	0	1	1
AKT1	Pancreatic Cancer	factor(sample_subtypes)Undifferentiated Carcinoma of the Pancreas	19.484	6385.77	0.003	0.998	1
AKT1	Pancreatic Cancer	factor(sample_all$sex)Male	0.524	0.556	0.942	0.346	1
AKT1	Pancreatic Cancer	factor(sample_status)1	0.722	0.544	1.327	0.185	1
AKT1	CNS Cancer	factor(aya_status)1	-0.696	1.058	-0.657	0.511	1
AKT1	CNS Cancer	TMB	0.112	0.129	0.866	0.386	1
AKT1	CNS Cancer	factor(sample_subtypes)Anaplastic Meningioma	0.048	6474.45	0	1	1
AKT1	CNS Cancer	factor(sample_subtypes)Atypical Meningioma	0.156	4749.75	0	1	1
AKT1	CNS Cancer	factor(sample_subtypes)Meningioma	18.473	3484.22	0.005	0.996	1
AKT1	CNS Cancer	factor(sample_subtypes)others	0.16	4994.82	0	1	1
AKT1	CNS Cancer	factor(sample_all$sex)Male	-0.223	0.608	-0.367	0.714	1
AKT1	CNS Cancer	factor(sample_status)1	-17.084	3405.66	-0.005	0.996	1
AKT1	Head and Neck Cancer	factor(aya_status)1	-15.918	3279.83	-0.005	0.996	1
AKT1	Head and Neck Cancer	TMB	0.027	0.013	2.075	0.038	0.4
AKT1	Head and Neck Cancer	factor(sample_subtypes)Head and Neck Neuroendocrine Carcinoma	-0.057	9371.9	0	1	1
AKT1	Head and Neck Cancer	factor(sample_subtypes)Head and Neck Squamous Cell Carcinoma	17.363	5999.61	0.003	0.998	1
AKT1	Head and Neck Cancer	factor(sample_subtypes)Head and Neck Squamous Cell Carcinoma of Unknown Primary	-0.715	8261.75	0	1	1
AKT1	Head and Neck Cancer	factor(sample_subtypes)Hypopharynx Squamous Cell Carcinoma	-0.11	9273.41	0	1	1
AKT1	Head and Neck Cancer	factor(sample_subtypes)Larynx Squamous Cell Carcinoma	-0.155	6932.8	0	1	1
AKT1	Head and Neck Cancer	factor(sample_subtypes)Nasopharyngeal Carcinoma	-0.057	7201.31	0	1	1
AKT1	Head and Neck Cancer	factor(sample_subtypes)Oral Cavity Squamous Cell Carcinoma	15.742	5999.61	0.003	0.998	1
AKT1	Head and Neck Cancer	factor(sample_subtypes)Oropharynx Squamous Cell Carcinoma	16.898	5999.61	0.003	0.998	1
AKT1	Head and Neck Cancer	factor(sample_subtypes)others	0.405	7269.41	0	1	1
AKT1	Head and Neck Cancer	factor(sample_subtypes)Sinonasal Squamous Cell Carcinoma	-0.17	7928.06	0	1	1
AKT1	Head and Neck Cancer	factor(sample_all$sex)Male	0.151	0.811	0.186	0.852	1
AKT1	Head and Neck Cancer	factor(sample_status)1	0.424	0.653	0.65	0.516	1
AKT1	Endometrial Cancer	factor(aya_status)1	0.49	0.453	1.083	0.279	1
AKT1	Endometrial Cancer	TMB	0.007	0.001	7.448	9.47e-14	5.82e-12
AKT1	Endometrial Cancer	factor(sample_subtypes)others	0.627	0.802	0.783	0.434	1
AKT1	Endometrial Cancer	factor(sample_subtypes)Uterine Carcinosarcoma/Uterine Malignant Mixed Mullerian Tumor	-0.788	0.598	-1.317	0.188	1
AKT1	Endometrial Cancer	factor(sample_subtypes)Uterine Clear Cell Carcinoma	0.182	0.67	0.272	0.786	1
AKT1	Endometrial Cancer	factor(sample_subtypes)Uterine Dedifferentiated Carcinoma	0.521	1.076	0.484	0.629	1
AKT1	Endometrial Cancer	factor(sample_subtypes)Uterine Endometrioid Carcinoma	0.888	0.335	2.649	0.00806	0.115
AKT1	Endometrial Cancer	factor(sample_subtypes)Uterine Mixed Endometrial Carcinoma	-1.285	1.06	-1.212	0.225	1
AKT1	Endometrial Cancer	factor(sample_subtypes)Uterine Serous Carcinoma/Uterine Papillary Serous Carcinoma	-0.798	0.523	-1.525	0.127	0.883
AKT1	Endometrial Cancer	factor(sample_subtypes)Uterine Undifferentiated Carcinoma	-0.218	1.312	-0.166	0.868	1
AKT1	Endometrial Cancer	factor(sample_status)1	0.121	0.225	0.54	0.589	1
AKT1	Appendiceal Cancer	factor(aya_status)1	0.234	1.098	0.214	0.831	1
AKT1	Appendiceal Cancer	TMB	0.073	0.039	1.849	0.0644	0.583
AKT1	Appendiceal Cancer	factor(sample_subtypes)Goblet Cell Carcinoid of the Appendix	-14.477	1622.69	-0.009	0.993	1
AKT1	Appendiceal Cancer	factor(sample_subtypes)Mucinous Adenocarcinoma of the Appendix	2.284	1.071	2.133	0.033	0.361
AKT1	Appendiceal Cancer	factor(sample_subtypes)others	-14.168	4009.45	-0.004	0.997	1
AKT1	Appendiceal Cancer	factor(sample_subtypes)Signet Ring Cell Type of the Appendix	-14.309	2362.98	-0.006	0.995	1
AKT1	Appendiceal Cancer	factor(sample_all$sex)Male	0.211	0.67	0.316	0.752	1
AKT1	Appendiceal Cancer	factor(sample_status)1	-0.916	0.697	-1.314	0.189	1
AKT1	Skin Cancer, Non-Melanoma	factor(aya_status)1	2.207	1.234	1.789	0.0735	0.635
AKT1	Skin Cancer, Non-Melanoma	TMB	0.005	0.005	1.073	0.283	1
AKT1	Skin Cancer, Non-Melanoma	factor(sample_subtypes)Basal Cell Carcinoma	17.217	3081.07	0.006	0.996	1
AKT1	Skin Cancer, Non-Melanoma	factor(sample_subtypes)Cutaneous Squamous Cell Carcinoma	18.804	3081.07	0.006	0.995	1
AKT1	Skin Cancer, Non-Melanoma	factor(sample_subtypes)Dermatofibrosarcoma Protuberans	0.134	4673.1	0	1	1
AKT1	Skin Cancer, Non-Melanoma	factor(sample_subtypes)Extramammary Paget Disease	0.985	3765.14	0	1	1
AKT1	Skin Cancer, Non-Melanoma	factor(sample_subtypes)Merkel Cell Carcinoma	16.133	3081.07	0.005	0.996	1
AKT1	Skin Cancer, Non-Melanoma	factor(sample_subtypes)others	0.842	4730.68	0	1	1
AKT1	Skin Cancer, Non-Melanoma	factor(sample_subtypes)Sebaceous Carcinoma	18.572	3081.07	0.006	0.995	1
AKT1	Skin Cancer, Non-Melanoma	factor(sample_subtypes)Skin Adnexal Carcinoma	0.881	4760.32	0	1	1
AKT1	Skin Cancer, Non-Melanoma	factor(sample_all$sex)Male	-0.624	0.621	-1.004	0.316	1
AKT1	Skin Cancer, Non-Melanoma	factor(sample_status)1	0.134	0.573	0.234	0.815	1
AKT1	Bladder Cancer	factor(aya_status)1	0.797	1.039	0.768	0.443	1
AKT1	Bladder Cancer	TMB	0.012	0.003	4.055	5.01e-05	0.00115
AKT1	Bladder Cancer	factor(sample_subtypes)Bladder Squamous Cell Carcinoma	-0.014	2772.09	0	1	1
AKT1	Bladder Cancer	factor(sample_subtypes)Bladder Urothelial Carcinoma	15.57	1395.22	0.011	0.991	1
AKT1	Bladder Cancer	factor(sample_subtypes)others	-0.055	2102.34	0	1	1
AKT1	Bladder Cancer	factor(sample_subtypes)Plasmacytoid/Signet Ring Cell Bladder Carcinoma	0.025	2946.77	0	1	1
AKT1	Bladder Cancer	factor(sample_subtypes)Small Cell Bladder Cancer	16.326	1395.22	0.012	0.991	1
AKT1	Bladder Cancer	factor(sample_subtypes)Upper Tract Urothelial Carcinoma	15.447	1395.22	0.011	0.991	1
AKT1	Bladder Cancer	factor(sample_subtypes)Urethral Urothelial Carcinoma	16.026	1395.22	0.011	0.991	1
AKT1	Bladder Cancer	factor(sample_all$sex)Male	-0.409	0.351	-1.167	0.243	1
AKT1	Bladder Cancer	factor(sample_status)1	0.248	0.374	0.663	0.507	1
AKT1	Uterine Sarcoma	factor(aya_status)1	-16.916	3341.98	-0.005	0.996	1
AKT1	Uterine Sarcoma	TMB	-0.13	0.206	-0.628	0.53	1
AKT1	Uterine Sarcoma	factor(sample_subtypes)Low-Grade Endometrial Stromal Sarcoma	16.978	3251.08	0.005	0.996	1
AKT1	Uterine Sarcoma	factor(sample_subtypes)others	15.684	3251.08	0.005	0.996	1
AKT1	Uterine Sarcoma	factor(sample_subtypes)Uterine Adenosarcoma	16.653	3251.08	0.005	0.996	1
AKT1	Uterine Sarcoma	factor(sample_subtypes)Uterine Leiomyosarcoma	15.916	3251.08	0.005	0.996	1
AKT1	Uterine Sarcoma	factor(sample_subtypes)Uterine Perivascular Epithelioid Cell Tumor	-0.666	5211.65	0	1	1
AKT1	Uterine Sarcoma	factor(sample_subtypes)Uterine Sarcoma, Other	-0.537	4373.99	0	1	1
AKT1	Uterine Sarcoma	factor(sample_status)1	-1.563	1.114	-1.403	0.161	1
AKT2	Glioma	factor(aya_status)1	0.553	0.439	1.261	0.207	1
AKT2	Glioma	TMB	0.022	0.002	10.076	7.02e-24	9.16e-22
AKT2	Glioma	factor(sample_subtypes)Anaplastic Oligoastrocytoma	-15.653	4386.11	-0.004	0.997	1
AKT2	Glioma	factor(sample_subtypes)Anaplastic Oligodendroglioma	2.126	1.131	1.88	0.0601	0.556
AKT2	Glioma	factor(sample_subtypes)Anaplastic Pleomorphic Xanthoastrocytoma	-15.381	6352.2	-0.002	0.998	1
AKT2	Glioma	factor(sample_subtypes)Astrocytoma	0.487	1.423	0.342	0.732	1
AKT2	Glioma	factor(sample_subtypes)Diffuse Astrocytoma	-15.368	2667.05	-0.006	0.995	1
AKT2	Glioma	factor(sample_subtypes)Diffuse Glioma	1.204	1.425	0.845	0.398	1
AKT2	Glioma	factor(sample_subtypes)Diffuse Intrinsic Pontine Glioma	-15.131	3832.58	-0.004	0.997	1
AKT2	Glioma	factor(sample_subtypes)Dysembryoplastic Neuroepithelial Tumor	-15.222	6675.5	-0.002	0.998	1
AKT2	Glioma	factor(sample_subtypes)Encapsulated Glioma	-15.227	5505.19	-0.003	0.998	1
AKT2	Glioma	factor(sample_subtypes)Ependymoma	-15.248	3156.66	-0.005	0.996	1
AKT2	Glioma	factor(sample_subtypes)Ganglioglioma	-15.248	3002.67	-0.005	0.996	1
AKT2	Glioma	factor(sample_subtypes)Glioblastoma	1.183	1.09	1.086	0.278	1
AKT2	Glioma	factor(sample_subtypes)Glioblastoma Multiforme	1.276	1.057	1.207	0.227	1
AKT2	Glioma	factor(sample_subtypes)Glioma, NOS	-15.258	3276.05	-0.005	0.996	1
AKT2	Glioma	factor(sample_subtypes)Gliosarcoma	-15.312	3889.2	-0.004	0.997	1
AKT2	Glioma	factor(sample_subtypes)High-Grade Glioma, NOS	0.272	1.469	0.185	0.853	1
AKT2	Glioma	factor(sample_subtypes)Low-Grade Glioma, NOS	-15.252	2267.05	-0.007	0.995	1
AKT2	Glioma	factor(sample_subtypes)Oligoastrocytoma	-15.61	5879.57	-0.003	0.998	1
AKT2	Glioma	factor(sample_subtypes)Oligodendroglioma	0.561	1.426	0.394	0.694	1
AKT2	Glioma	factor(sample_subtypes)others	-15.192	6357.72	-0.002	0.998	1
AKT2	Glioma	factor(sample_subtypes)Pilocytic Astrocytoma	-15.197	2023.61	-0.008	0.994	1
AKT2	Glioma	factor(sample_subtypes)Pilomyxoid Astrocytoma	-15.121	7295.56	-0.002	0.998	1
AKT2	Glioma	factor(sample_subtypes)Pleomorphic Xanthoastrocytoma	-15.279	5937.12	-0.003	0.998	1
AKT2	Glioma	factor(sample_all$sex)Male	-0.008	0.369	-0.021	0.983	1
AKT2	Glioma	factor(sample_status)1	0.279	0.524	0.533	0.594	1
AKT2	Breast Cancer	factor(aya_status)1	0.494	0.452	1.092	0.275	1
AKT2	Breast Cancer	TMB	0.013	0.006	2.444	0.0145	0.189
AKT2	Breast Cancer	factor(sample_subtypes)Breast Invasive Cancer, NOS	-0.233	3003.23	0	1	1
AKT2	Breast Cancer	factor(sample_subtypes)Breast Invasive Carcinoma, NOS	-0.288	2903.1	0	1	1
AKT2	Breast Cancer	factor(sample_subtypes)Breast Invasive Ductal Carcinoma	15.194	2757.89	0.006	0.996	1
AKT2	Breast Cancer	factor(sample_subtypes)Breast Invasive Lobular Carcinoma	14.82	2757.89	0.005	0.996	1
AKT2	Breast Cancer	factor(sample_subtypes)Breast Invasive Mixed Mucinous Carcinoma	-0.096	4423.32	0	1	1
AKT2	Breast Cancer	factor(sample_subtypes)Breast Mixed Ductal and Lobular Carcinoma	15.649	2757.89	0.006	0.995	1
AKT2	Breast Cancer	factor(sample_subtypes)Invasive Breast Carcinoma	14.741	2757.89	0.005	0.996	1
AKT2	Breast Cancer	factor(sample_subtypes)Metaplastic Breast Cancer	-0.03	3804.9	0	1	1
AKT2	Breast Cancer	factor(sample_subtypes)others	-0.047	3451.45	0	1	1
AKT2	Breast Cancer	factor(sample_all$sex)Male	-14.952	1938.79	-0.008	0.994	1
AKT2	Breast Cancer	factor(sample_status)1	0.514	0.345	1.489	0.136	0.917
AKT2	Colorectal Cancer	factor(aya_status)1	-0.666	0.5	-1.331	0.183	1
AKT2	Colorectal Cancer	TMB	0.016	0.002	9.014	1.98e-19	1.8e-17
AKT2	Colorectal Cancer	factor(sample_subtypes)Colorectal Adenocarcinoma	0.208	0.375	0.556	0.579	1
AKT2	Colorectal Cancer	factor(sample_subtypes)Mucinous Adenocarcinoma of the Colon and Rectum	0.786	0.522	1.508	0.132	0.898
AKT2	Colorectal Cancer	factor(sample_subtypes)others	1.157	1.053	1.099	0.272	1
AKT2	Colorectal Cancer	factor(sample_subtypes)Rectal Adenocarcinoma	0.058	0.345	0.169	0.866	1
AKT2	Colorectal Cancer	factor(sample_subtypes)Signet Ring Cell Adenocarcinoma of the Colon and Rectum	1.11	1.061	1.047	0.295	1
AKT2	Colorectal Cancer	factor(sample_all$sex)Male	-0.044	0.253	-0.173	0.863	1
AKT2	Colorectal Cancer	factor(sample_status)1	-0.149	0.286	-0.521	0.603	1
AKT2	Soft Tissue Sarcoma	factor(aya_status)1	0.323	0.851	0.379	0.705	1
AKT2	Soft Tissue Sarcoma	TMB	0.045	0.015	3.02	0.00252	0.0415
AKT2	Soft Tissue Sarcoma	factor(sample_subtypes)Alveolar Soft Part Sarcoma	-0.008	11551.9	0	1	1
AKT2	Soft Tissue Sarcoma	factor(sample_subtypes)Angiosarcoma	-0.253	8331.38	0	1	1
AKT2	Soft Tissue Sarcoma	factor(sample_subtypes)Clear Cell Sarcoma	-0.02	11682.2	0	1	1
AKT2	Soft Tissue Sarcoma	factor(sample_subtypes)Dedifferentiated Liposarcoma	0.071	7785.75	0	1	1
AKT2	Soft Tissue Sarcoma	factor(sample_subtypes)Desmoid/Aggressive Fibromatosis	-0.233	9231.47	0	1	1
AKT2	Soft Tissue Sarcoma	factor(sample_subtypes)Desmoplastic Small-Round-Cell Tumor	-0.002	8885.29	0	1	1
AKT2	Soft Tissue Sarcoma	factor(sample_subtypes)Embryonal Rhabdomyosarcoma	-0.127	9230.59	0	1	1
AKT2	Soft Tissue Sarcoma	factor(sample_subtypes)Epithelioid Hemangioendothelioma	-0.108	10307.7	0	1	1
AKT2	Soft Tissue Sarcoma	factor(sample_subtypes)Epithelioid Sarcoma	-0.098	10393.1	0	1	1
AKT2	Soft Tissue Sarcoma	factor(sample_subtypes)Follicular Dendritic Cell Sarcoma	-0.005	14306.6	0	1	1
AKT2	Soft Tissue Sarcoma	factor(sample_subtypes)Hemangioma	-0.225	8466.26	0	1	1
AKT2	Soft Tissue Sarcoma	factor(sample_subtypes)Inflammatory Myofibroblastic Tumor	19.462	7154.69	0.003	0.998	1
AKT2	Soft Tissue Sarcoma	factor(sample_subtypes)Intimal Sarcoma	-0.136	12494.8	0	1	1
AKT2	Soft Tissue Sarcoma	factor(sample_subtypes)Leiomyosarcoma	0.006	7636.56	0	1	1
AKT2	Soft Tissue Sarcoma	factor(sample_subtypes)Liposarcoma	0.028	11974	0	1	1
AKT2	Soft Tissue Sarcoma	factor(sample_subtypes)Myxofibrosarcoma	18.277	7154.69	0.003	0.998	1
AKT2	Soft Tissue Sarcoma	factor(sample_subtypes)Myxoid/Round-Cell Liposarcoma	18.213	7154.69	0.003	0.998	1
AKT2	Soft Tissue Sarcoma	factor(sample_subtypes)others	-0.094	8390.23	0	1	1
AKT2	Soft Tissue Sarcoma	factor(sample_subtypes)Perivascular Epithelioid Cell Tumor	-0.002	10505.5	0	1	1
AKT2	Soft Tissue Sarcoma	factor(sample_subtypes)Pleomorphic Liposarcoma	-0.065	10571.4	0	1	1
AKT2	Soft Tissue Sarcoma	factor(sample_subtypes)Radiation-Associated Sarcoma	-0.14	13693.6	0	1	1
AKT2	Soft Tissue Sarcoma	factor(sample_subtypes)Rhabdomyosarcoma	-0.114	9364.98	0	1	1
AKT2	Soft Tissue Sarcoma	factor(sample_subtypes)Round Cell Sarcoma, NOS	18.75	7154.69	0.003	0.998	1
AKT2	Soft Tissue Sarcoma	factor(sample_subtypes)Sarcoma, NOS	17.384	7154.69	0.002	0.998	1
AKT2	Soft Tissue Sarcoma	factor(sample_subtypes)Soft Tissue Myoepithelial Carcinoma	-0.184	13829.7	0	1	1
AKT2	Soft Tissue Sarcoma	factor(sample_subtypes)Solitary Fibrous Tumor/Hemangiopericytoma	18.08	7154.69	0.003	0.998	1
AKT2	Soft Tissue Sarcoma	factor(sample_subtypes)Synovial Sarcoma	-0.081	8233.5	0	1	1
AKT2	Soft Tissue Sarcoma	factor(sample_subtypes)Undifferentiated Pleomorphic Sarcoma/Malignant Fibrous Histiocytoma/High-Grade Spindle Cell Sarcoma	17.229	7154.69	0.002	0.998	1
AKT2	Soft Tissue Sarcoma	factor(sample_subtypes)Well-Differentiated Liposarcoma	0.134	8888.62	0	1	1
AKT2	Soft Tissue Sarcoma	factor(sample_all$sex)Male	-0.02	0.651	-0.031	0.975	1
AKT2	Soft Tissue Sarcoma	factor(sample_status)1	-0.436	0.809	-0.54	0.59	1
AKT2	Melanoma	factor(aya_status)1	-1.364	1.155	-1.18	0.238	1
AKT2	Melanoma	TMB	0.019	0.003	6.161	7.21e-10	3.22e-08
AKT2	Melanoma	factor(sample_subtypes)Anorectal Mucosal Melanoma	15.018	949.854	0.016	0.987	1
AKT2	Melanoma	factor(sample_subtypes)Cutaneous Melanoma	15.061	949.854	0.016	0.987	1
AKT2	Melanoma	factor(sample_subtypes)Desmoplastic Melanoma	-1.096	2662.43	0	1	1
AKT2	Melanoma	factor(sample_subtypes)Head and Neck Mucosal Melanoma	0.119	1549.63	0	1	1
AKT2	Melanoma	factor(sample_subtypes)Melanoma	14.974	949.854	0.016	0.987	1
AKT2	Melanoma	factor(sample_subtypes)Melanoma of Unknown Primary	15.264	949.854	0.016	0.987	1
AKT2	Melanoma	factor(sample_subtypes)Mucosal Melanoma of the Vulva/Vagina	0.218	1611.06	0	1	1
AKT2	Melanoma	factor(sample_subtypes)Ocular Melanoma	0.067	2522.55	0	1	1
AKT2	Melanoma	factor(sample_subtypes)others	15.881	949.854	0.017	0.987	1
AKT2	Melanoma	factor(sample_subtypes)Uveal Melanoma	14.003	949.854	0.015	0.988	1
AKT2	Melanoma	factor(sample_all$sex)Male	0.34	0.38	0.896	0.37	1
AKT2	Melanoma	factor(sample_status)1	0.118	0.365	0.323	0.747	1
AKT2	Thyroid Cancer	factor(aya_status)1	-17.651	3163.64	-0.006	0.996	1
AKT2	Thyroid Cancer	TMB	0.294	0.069	4.268	1.97e-05	0.000485
AKT2	Thyroid Cancer	factor(sample_subtypes)Follicular Thyroid Cancer	-17.526	6404.97	-0.003	0.998	1
AKT2	Thyroid Cancer	factor(sample_subtypes)Hurthle Cell Thyroid Cancer	-18.112	4840.08	-0.004	0.997	1
AKT2	Thyroid Cancer	factor(sample_subtypes)Medullary Thyroid Cancer	-17.181	4080.99	-0.004	0.997	1
AKT2	Thyroid Cancer	factor(sample_subtypes)others	-17.886	12438.7	-0.001	0.999	1
AKT2	Thyroid Cancer	factor(sample_subtypes)Papillary Thyroid Cancer	1.03	1.081	0.953	0.341	1
AKT2	Thyroid Cancer	factor(sample_subtypes)Poorly Differentiated Thyroid Cancer	-32.757	2334.49	-0.014	0.989	1
AKT2	Thyroid Cancer	factor(sample_all$sex)Male	-1.039	0.723	-1.436	0.151	0.969
AKT2	Thyroid Cancer	factor(sample_status)1	1.248	0.657	1.899	0.0576	0.54
AKT2	Non-Small Cell Lung Cancer	factor(aya_status)1	-14.37	810.277	-0.018	0.986	1
AKT2	Non-Small Cell Lung Cancer	TMB	0.048	0.007	6.674	2.49e-11	1.28e-09
AKT2	Non-Small Cell Lung Cancer	factor(sample_subtypes)Large Cell Lung Carcinoma	-15.895	2734.27	-0.006	0.995	1
AKT2	Non-Small Cell Lung Cancer	factor(sample_subtypes)Large Cell Neuroendocrine Carcinoma	-0.159	1.172	-0.136	0.892	1
AKT2	Non-Small Cell Lung Cancer	factor(sample_subtypes)Lung Adenocarcinoma	-0.882	1.018	-0.866	0.386	1
AKT2	Non-Small Cell Lung Cancer	factor(sample_subtypes)Lung Adenosquamous Carcinoma	-15.504	1285.94	-0.012	0.99	1
AKT2	Non-Small Cell Lung Cancer	factor(sample_subtypes)Lung Carcinoid	-14.951	879.751	-0.017	0.986	1
AKT2	Non-Small Cell Lung Cancer	factor(sample_subtypes)Lung Neuroendocrine Tumor	-15.664	1510.81	-0.01	0.992	1
AKT2	Non-Small Cell Lung Cancer	factor(sample_subtypes)Lung Squamous Cell Carcinoma	-1.314	1.094	-1.2	0.23	1
AKT2	Non-Small Cell Lung Cancer	factor(sample_subtypes)Non-Small Cell Lung Cancer	-1.274	1.166	-1.093	0.274	1
AKT2	Non-Small Cell Lung Cancer	factor(sample_subtypes)others	-15.216	1735.6	-0.009	0.993	1
AKT2	Non-Small Cell Lung Cancer	factor(sample_subtypes)Pleomorphic Carcinoma of the Lung	-15.644	1490.01	-0.01	0.992	1
AKT2	Non-Small Cell Lung Cancer	factor(sample_subtypes)Poorly Differentiated Non-Small Cell Lung Cancer	-1.829	1.474	-1.241	0.215	1
AKT2	Non-Small Cell Lung Cancer	factor(sample_subtypes)Sarcomatoid Carcinoma of the Lung	0.772	1.247	0.619	0.536	1
AKT2	Non-Small Cell Lung Cancer	factor(sample_all$sex)Male	0.241	0.231	1.044	0.297	1
AKT2	Non-Small Cell Lung Cancer	factor(sample_status)1	0.348	0.227	1.53	0.126	0.878
AKT2	Ovarian Cancer	factor(aya_status)1	1.49	0.892	1.671	0.0948	0.746
AKT2	Ovarian Cancer	TMB	0.005	0.01	0.494	0.621	1
AKT2	Ovarian Cancer	factor(sample_subtypes)Endometrioid Ovarian Cancer	1.026	1.243	0.825	0.409	1
AKT2	Ovarian Cancer	factor(sample_subtypes)High-Grade Serous Fallopian Tube Cancer	-16.01	3431.05	-0.005	0.996	1
AKT2	Ovarian Cancer	factor(sample_subtypes)High-Grade Serous Ovarian Cancer	-0.036	1.154	-0.031	0.975	1
AKT2	Ovarian Cancer	factor(sample_subtypes)Low-Grade Serous Ovarian Cancer	-16.333	2081.81	-0.008	0.994	1
AKT2	Ovarian Cancer	factor(sample_subtypes)Mixed Ovarian Carcinoma	-16.13	4164.73	-0.004	0.997	1
AKT2	Ovarian Cancer	factor(sample_subtypes)Mucinous Ovarian Cancer	-16.755	3483.51	-0.005	0.996	1
AKT2	Ovarian Cancer	factor(sample_subtypes)others	-16.35	4897.09	-0.003	0.997	1
AKT2	Ovarian Cancer	factor(sample_subtypes)Ovarian Cancer, Other	-15.929	5191.29	-0.003	0.998	1
AKT2	Ovarian Cancer	factor(sample_subtypes)Ovarian Carcinosarcoma/Malignant Mixed Mesodermal Tumor	0.929	1.471	0.631	0.528	1
AKT2	Ovarian Cancer	factor(sample_subtypes)Ovarian Epithelial Tumor	1.422	1.457	0.976	0.329	1
AKT2	Ovarian Cancer	factor(sample_subtypes)Serous Borderline Ovarian Tumor	-16.799	4799.99	-0.003	0.997	1
AKT2	Ovarian Cancer	factor(sample_subtypes)Serous Ovarian Cancer	-16.002	2854.58	-0.006	0.996	1
AKT2	Ovarian Cancer	factor(sample_subtypes)Small Cell Carcinoma of the Ovary	2.262	1.363	1.66	0.0969	0.757
AKT2	Ovarian Cancer	factor(sample_status)1	-0.666	0.631	-1.056	0.291	1
AKT2	Cancer of Unknown Primary	factor(aya_status)1	-16.774	1321.69	-0.013	0.99	1
AKT2	Cancer of Unknown Primary	TMB	0.016	0.005	3.461	0.000538	0.0102
AKT2	Cancer of Unknown Primary	factor(sample_subtypes)Cancer of Unknown Primary	0.228	0.676	0.338	0.736	1
AKT2	Cancer of Unknown Primary	factor(sample_subtypes)Cancer of Unknown Primary, NOS	-15.529	1319.14	-0.012	0.991	1
AKT2	Cancer of Unknown Primary	factor(sample_subtypes)Neuroendocrine Carcinoma, NOS	-15.454	1420.96	-0.011	0.991	1
AKT2	Cancer of Unknown Primary	factor(sample_subtypes)Neuroendocrine Tumor, NOS	-0.22	1.121	-0.196	0.844	1
AKT2	Cancer of Unknown Primary	factor(sample_subtypes)others	2.909	1.198	2.428	0.0152	0.196
AKT2	Cancer of Unknown Primary	factor(sample_subtypes)Poorly Differentiated Carcinoma, NOS	0.14	0.866	0.161	0.872	1
AKT2	Cancer of Unknown Primary	factor(sample_subtypes)Small Cell Carcinoma of Unknown Primary	0.981	1.134	0.865	0.387	1
AKT2	Cancer of Unknown Primary	factor(sample_subtypes)Squamous Cell Carcinoma, NOS	1.289	0.665	1.938	0.0526	0.507
AKT2	Cancer of Unknown Primary	factor(sample_subtypes)Undifferentiated Malignant Neoplasm	1.181	0.885	1.334	0.182	1
AKT2	Cancer of Unknown Primary	factor(sample_all$sex)Male	0.213	0.449	0.475	0.635	1
AKT2	Cancer of Unknown Primary	factor(sample_all$sex)Unknown	0.01	17779.6	0	1	1
AKT2	Cancer of Unknown Primary	factor(sample_status)1	-0.34	0.47	-0.725	0.468	1
AKT2	Esophagogastric Cancer	factor(aya_status)1	-15.885	2343.97	-0.007	0.995	1
AKT2	Esophagogastric Cancer	TMB	0.043	0.009	4.725	2.3e-06	6.71e-05
AKT2	Esophagogastric Cancer	factor(sample_subtypes)Diffuse Type Stomach Adenocarcinoma	-16.565	5401.3	-0.003	0.998	1
AKT2	Esophagogastric Cancer	factor(sample_subtypes)Esophageal Adenocarcinoma	-0.395	0.725	-0.544	0.586	1
AKT2	Esophagogastric Cancer	factor(sample_subtypes)Esophageal Poorly Differentiated Carcinoma	1.038	1.177	0.882	0.378	1
AKT2	Esophagogastric Cancer	factor(sample_subtypes)Esophageal Squamous Cell Carcinoma	-0.134	1.166	-0.115	0.908	1
AKT2	Esophagogastric Cancer	factor(sample_subtypes)Esophagogastric Adenocarcinoma	-1.666	1.465	-1.138	0.255	1
AKT2	Esophagogastric Cancer	factor(sample_subtypes)Intestinal Type Stomach Adenocarcinoma	-16.805	5275.28	-0.003	0.997	1
AKT2	Esophagogastric Cancer	factor(sample_subtypes)others	-16.663	5680.67	-0.003	0.998	1
AKT2	Esophagogastric Cancer	factor(sample_subtypes)Poorly Differentiated Carcinoma of the Stomach	-16.826	2879.51	-0.006	0.995	1
AKT2	Esophagogastric Cancer	factor(sample_subtypes)Signet Ring Cell Carcinoma of the Stomach	-16.292	3231.45	-0.005	0.996	1
AKT2	Esophagogastric Cancer	factor(sample_subtypes)Stomach Adenocarcinoma	-0.718	0.853	-0.841	0.4	1
AKT2	Esophagogastric Cancer	factor(sample_subtypes)Tubular Stomach Adenocarcinoma	-17.285	6954.3	-0.002	0.998	1
AKT2	Esophagogastric Cancer	factor(sample_all$sex)Male	0.94	0.807	1.165	0.244	1
AKT2	Esophagogastric Cancer	factor(sample_status)1	0.098	0.672	0.146	0.884	1
AKT2	Renal Cell Carcinoma	factor(aya_status)1	-15.941	2227.7	-0.007	0.994	1
AKT2	Renal Cell Carcinoma	TMB	0.12	0.054	2.239	0.0252	0.294
AKT2	Renal Cell Carcinoma	factor(sample_subtypes)Collecting Duct Renal Cell Carcinoma	-0.721	7578	0	1	1
AKT2	Renal Cell Carcinoma	factor(sample_subtypes)FH-Deficient Renal Cell Carcinoma	0.184	7819.66	0	1	1
AKT2	Renal Cell Carcinoma	factor(sample_subtypes)others	-1.922	5587.1	0	1	1
AKT2	Renal Cell Carcinoma	factor(sample_subtypes)Papillary Renal Cell Carcinoma	17.63	3175.45	0.006	0.996	1
AKT2	Renal Cell Carcinoma	factor(sample_subtypes)Renal Angiomyolipoma	0.033	6609.61	0	1	1
AKT2	Renal Cell Carcinoma	factor(sample_subtypes)Renal Cell Carcinoma	15.876	3175.45	0.005	0.996	1
AKT2	Renal Cell Carcinoma	factor(sample_subtypes)Renal Clear Cell Carcinoma	16.806	3175.45	0.005	0.996	1
AKT2	Renal Cell Carcinoma	factor(sample_subtypes)Renal Medullary Carcinoma	1.287	7437.21	0	1	1
AKT2	Renal Cell Carcinoma	factor(sample_subtypes)Renal Non-Clear Cell Carcinoma	0.236	6952.52	0	1	1
AKT2	Renal Cell Carcinoma	factor(sample_subtypes)Renal Oncocytoma	17.998	3175.45	0.006	0.995	1
AKT2	Renal Cell Carcinoma	factor(sample_subtypes)Sarcomatoid Renal Cell Carcinoma	-0.186	6939.37	0	1	1
AKT2	Renal Cell Carcinoma	factor(sample_subtypes)Translocation-Associated Renal Cell Carcinoma	0.434	5608.27	0	1	1
AKT2	Renal Cell Carcinoma	factor(sample_subtypes)Unclassified Renal Cell Carcinoma	-1.848	3819.36	0	1	1
AKT2	Renal Cell Carcinoma	factor(sample_all$sex)Male	-0.291	0.606	-0.481	0.631	1
AKT2	Renal Cell Carcinoma	factor(sample_status)1	-0.27	0.634	-0.426	0.67	1
AKT2	Hepatobiliary Cancer	factor(aya_status)1	-16.341	3998.77	-0.004	0.997	1
AKT2	Hepatobiliary Cancer	TMB	0.027	0.026	1.037	0.3	1
AKT2	Hepatobiliary Cancer	factor(sample_subtypes)Extrahepatic Cholangiocarcinoma	-16.959	3833.01	-0.004	0.996	1
AKT2	Hepatobiliary Cancer	factor(sample_subtypes)Fibrolamellar Carcinoma	-15.246	6500.09	-0.002	0.998	1
AKT2	Hepatobiliary Cancer	factor(sample_subtypes)Gallbladder Adenocarcinoma, NOS	1.524	1.454	1.048	0.295	1
AKT2	Hepatobiliary Cancer	factor(sample_subtypes)Gallbladder Cancer	0.411	1.448	0.284	0.776	1
AKT2	Hepatobiliary Cancer	factor(sample_subtypes)Hepatoblastoma	-17.013	8586.16	-0.002	0.998	1
AKT2	Hepatobiliary Cancer	factor(sample_subtypes)Hepatocellular Carcinoma	1.089	1.141	0.954	0.34	1
AKT2	Hepatobiliary Cancer	factor(sample_subtypes)Hepatocellular Carcinoma plus Intrahepatic Cholangiocarcinoma	-16.871	7004.46	-0.002	0.998	1
AKT2	Hepatobiliary Cancer	factor(sample_subtypes)Intrahepatic Cholangiocarcinoma	-16.83	2057.22	-0.008	0.993	1
AKT2	Hepatobiliary Cancer	factor(sample_subtypes)others	-16.884	11694.2	-0.001	0.999	1
AKT2	Hepatobiliary Cancer	factor(sample_subtypes)Perihilar Cholangiocarcinoma	-16.813	10553.3	-0.002	0.999	1
AKT2	Hepatobiliary Cancer	factor(sample_all$sex)Male	0.643	0.931	0.691	0.49	1
AKT2	Hepatobiliary Cancer	factor(sample_status)1	0.086	0.875	0.098	0.922	1
AKT2	Pancreatic Cancer	factor(aya_status)1	-15.46	1650.56	-0.009	0.993	1
AKT2	Pancreatic Cancer	TMB	0.018	0.005	4.037	5.4e-05	0.00123
AKT2	Pancreatic Cancer	factor(sample_subtypes)Adenosquamous Carcinoma of the Pancreas	0.241	3408.15	0	1	1
AKT2	Pancreatic Cancer	factor(sample_subtypes)Intraductal Papillary Mucinous Neoplasm	0.455	4489.57	0	1	1
AKT2	Pancreatic Cancer	factor(sample_subtypes)others	0.598	5272.89	0	1	1
AKT2	Pancreatic Cancer	factor(sample_subtypes)Pancreatic Adenocarcinoma	14.311	2423.25	0.006	0.995	1
AKT2	Pancreatic Cancer	factor(sample_subtypes)Pancreatic Neuroendocrine Tumor	16.291	2423.25	0.007	0.995	1
AKT2	Pancreatic Cancer	factor(sample_subtypes)Solid Pseudopapillary Neoplasm of the Pancreas	0.443	4618.66	0	1	1
AKT2	Pancreatic Cancer	factor(sample_subtypes)Undifferentiated Carcinoma of the Pancreas	0.16	3944.01	0	1	1
AKT2	Pancreatic Cancer	factor(sample_all$sex)Male	0.074	0.62	0.12	0.904	1
AKT2	Pancreatic Cancer	factor(sample_status)1	0.729	0.623	1.169	0.242	1
AKT2	Head and Neck Cancer	factor(aya_status)1	-15.597	3293.55	-0.005	0.996	1
AKT2	Head and Neck Cancer	TMB	0.039	0.014	2.855	0.00431	0.0666
AKT2	Head and Neck Cancer	factor(sample_subtypes)Head and Neck Neuroendocrine Carcinoma	-0.15	9302.72	0	1	1
AKT2	Head and Neck Cancer	factor(sample_subtypes)Head and Neck Squamous Cell Carcinoma	16.032	5992.35	0.003	0.998	1
AKT2	Head and Neck Cancer	factor(sample_subtypes)Head and Neck Squamous Cell Carcinoma of Unknown Primary	-1.191	8022.76	0	1	1
AKT2	Head and Neck Cancer	factor(sample_subtypes)Hypopharynx Squamous Cell Carcinoma	-0.24	9255.26	0	1	1
AKT2	Head and Neck Cancer	factor(sample_subtypes)Larynx Squamous Cell Carcinoma	-0.35	6923.4	0	1	1
AKT2	Head and Neck Cancer	factor(sample_subtypes)Nasopharyngeal Carcinoma	0.013	7182.39	0	1	1
AKT2	Head and Neck Cancer	factor(sample_subtypes)Oral Cavity Squamous Cell Carcinoma	15.567	5992.35	0.003	0.998	1
AKT2	Head and Neck Cancer	factor(sample_subtypes)Oropharynx Squamous Cell Carcinoma	16.961	5992.35	0.003	0.998	1
AKT2	Head and Neck Cancer	factor(sample_subtypes)others	0.4	7251.3	0	1	1
AKT2	Head and Neck Cancer	factor(sample_subtypes)Sinonasal Squamous Cell Carcinoma	17.76	5992.35	0.003	0.998	1
AKT2	Head and Neck Cancer	factor(sample_all$sex)Male	0.7	1.094	0.64	0.522	1
AKT2	Head and Neck Cancer	factor(sample_status)1	-0.213	0.788	-0.27	0.787	1
AKT2	Endometrial Cancer	factor(aya_status)1	0.435	0.774	0.562	0.574	1
AKT2	Endometrial Cancer	TMB	0.011	0.001	9.832	8.17e-23	9.87e-21
AKT2	Endometrial Cancer	factor(sample_subtypes)others	-13.332	635.494	-0.021	0.983	1
AKT2	Endometrial Cancer	factor(sample_subtypes)Uterine Carcinosarcoma/Uterine Malignant Mixed Mullerian Tumor	-1.455	1.117	-1.302	0.193	1
AKT2	Endometrial Cancer	factor(sample_subtypes)Uterine Clear Cell Carcinoma	-0.085	1.106	-0.077	0.938	1
AKT2	Endometrial Cancer	factor(sample_subtypes)Uterine Dedifferentiated Carcinoma	1.305	1.123	1.162	0.245	1
AKT2	Endometrial Cancer	factor(sample_subtypes)Uterine Endometrioid Carcinoma	0.287	0.474	0.604	0.546	1
AKT2	Endometrial Cancer	factor(sample_subtypes)Uterine Mixed Endometrial Carcinoma	-0.061	0.885	-0.068	0.945	1
AKT2	Endometrial Cancer	factor(sample_subtypes)Uterine Serous Carcinoma/Uterine Papillary Serous Carcinoma	-1.664	1.101	-1.512	0.131	0.894
AKT2	Endometrial Cancer	factor(sample_subtypes)Uterine Undifferentiated Carcinoma	-0.515	1.932	-0.266	0.79	1
AKT2	Endometrial Cancer	factor(sample_status)1	-0.397	0.462	-0.858	0.391	1
AKT2	Skin Cancer, Non-Melanoma	factor(aya_status)1	-14.897	2745.97	-0.005	0.996	1
AKT2	Skin Cancer, Non-Melanoma	TMB	0.018	0.005	3.655	0.000257	0.00519
AKT2	Skin Cancer, Non-Melanoma	factor(sample_subtypes)Basal Cell Carcinoma	14.434	3091.48	0.005	0.996	1
AKT2	Skin Cancer, Non-Melanoma	factor(sample_subtypes)Cutaneous Squamous Cell Carcinoma	15.989	3091.48	0.005	0.996	1
AKT2	Skin Cancer, Non-Melanoma	factor(sample_subtypes)Dermatofibrosarcoma Protuberans	0.159	4716.76	0	1	1
AKT2	Skin Cancer, Non-Melanoma	factor(sample_subtypes)Extramammary Paget Disease	16.618	3091.48	0.005	0.996	1
AKT2	Skin Cancer, Non-Melanoma	factor(sample_subtypes)Merkel Cell Carcinoma	14.302	3091.48	0.005	0.996	1
AKT2	Skin Cancer, Non-Melanoma	factor(sample_subtypes)others	-0.44	4817.42	0	1	1
AKT2	Skin Cancer, Non-Melanoma	factor(sample_subtypes)Sebaceous Carcinoma	-0.726	4679.38	0	1	1
AKT2	Skin Cancer, Non-Melanoma	factor(sample_subtypes)Skin Adnexal Carcinoma	-0.976	4753.76	0	1	1
AKT2	Skin Cancer, Non-Melanoma	factor(sample_all$sex)Male	-0.817	0.759	-1.076	0.282	1
AKT2	Skin Cancer, Non-Melanoma	factor(sample_status)1	0.492	0.673	0.731	0.465	1
AKT2	Bladder Cancer	factor(aya_status)1	-15.133	1881.17	-0.008	0.994	1
AKT2	Bladder Cancer	TMB	0.011	0.003	3.332	0.000861	0.0157
AKT2	Bladder Cancer	factor(sample_subtypes)Bladder Squamous Cell Carcinoma	0.193	2736.55	0	1	1
AKT2	Bladder Cancer	factor(sample_subtypes)Bladder Urothelial Carcinoma	15.055	1369.32	0.011	0.991	1
AKT2	Bladder Cancer	factor(sample_subtypes)others	0.077	2060.14	0	1	1
AKT2	Bladder Cancer	factor(sample_subtypes)Plasmacytoid/Signet Ring Cell Bladder Carcinoma	-0.194	2921.36	0	1	1
AKT2	Bladder Cancer	factor(sample_subtypes)Small Cell Bladder Cancer	-0.25	2399.26	0	1	1
AKT2	Bladder Cancer	factor(sample_subtypes)Upper Tract Urothelial Carcinoma	15.336	1369.32	0.011	0.991	1
AKT2	Bladder Cancer	factor(sample_subtypes)Urethral Urothelial Carcinoma	-0.409	2266.68	0	1	1
AKT2	Bladder Cancer	factor(sample_all$sex)Male	1.064	0.583	1.826	0.0679	0.603
AKT2	Bladder Cancer	factor(sample_status)1	0.381	0.4	0.954	0.34	1
AKT3	Glioma	factor(aya_status)1	0.006	0.453	0.014	0.989	1
AKT3	Glioma	TMB	0.017	0.002	8.906	5.28e-19	4.68e-17
AKT3	Glioma	factor(sample_subtypes)Anaplastic Oligoastrocytoma	-17.779	4333.68	-0.004	0.997	1
AKT3	Glioma	factor(sample_subtypes)Anaplastic Oligodendroglioma	-0.425	0.74	-0.574	0.566	1
AKT3	Glioma	factor(sample_subtypes)Anaplastic Pleomorphic Xanthoastrocytoma	-17.296	6350.15	-0.003	0.998	1
AKT3	Glioma	factor(sample_subtypes)Astrocytoma	-1.495	1.085	-1.377	0.168	1
AKT3	Glioma	factor(sample_subtypes)Diffuse Astrocytoma	-0.482	1.091	-0.442	0.659	1
AKT3	Glioma	factor(sample_subtypes)Diffuse Glioma	-17.278	2370.62	-0.007	0.994	1
AKT3	Glioma	factor(sample_subtypes)Diffuse Intrinsic Pontine Glioma	-17.334	3822.3	-0.005	0.996	1
AKT3	Glioma	factor(sample_subtypes)Dysembryoplastic Neuroepithelial Tumor	-17.128	6673.9	-0.003	0.998	1
AKT3	Glioma	factor(sample_subtypes)Encapsulated Glioma	-17.236	5498.71	-0.003	0.997	1
AKT3	Glioma	factor(sample_subtypes)Ependymoma	-17.232	3144.46	-0.005	0.996	1
AKT3	Glioma	factor(sample_subtypes)Ganglioglioma	-17.209	2997.42	-0.006	0.995	1
AKT3	Glioma	factor(sample_subtypes)Glioblastoma	-1.602	0.669	-2.395	0.0166	0.21
AKT3	Glioma	factor(sample_subtypes)Glioblastoma Multiforme	-1.801	0.616	-2.926	0.00344	0.0547
AKT3	Glioma	factor(sample_subtypes)Glioma, NOS	-17.276	3267.92	-0.005	0.996	1
AKT3	Glioma	factor(sample_subtypes)Gliosarcoma	-17.438	3888.99	-0.004	0.996	1
AKT3	Glioma	factor(sample_subtypes)High-Grade Glioma, NOS	-1.5	1.104	-1.358	0.174	1
AKT3	Glioma	factor(sample_subtypes)Low-Grade Glioma, NOS	-17.27	2260.89	-0.008	0.994	1
AKT3	Glioma	factor(sample_subtypes)Oligoastrocytoma	0.854	1.11	0.769	0.442	1
AKT3	Glioma	factor(sample_subtypes)Oligodendroglioma	-0.42	0.723	-0.581	0.562	1
AKT3	Glioma	factor(sample_subtypes)others	-17.211	6349.99	-0.003	0.998	1
AKT3	Glioma	factor(sample_subtypes)Pilocytic Astrocytoma	-17.3	2021.66	-0.009	0.993	1
AKT3	Glioma	factor(sample_subtypes)Pilomyxoid Astrocytoma	-17.514	7229.9	-0.002	0.998	1
AKT3	Glioma	factor(sample_subtypes)Pleomorphic Xanthoastrocytoma	-17.385	5898.16	-0.003	0.998	1
AKT3	Glioma	factor(sample_all$sex)Male	-0.575	0.398	-1.445	0.149	0.96
AKT3	Glioma	factor(sample_status)1	0.809	0.496	1.631	0.103	0.783
AKT3	Breast Cancer	factor(aya_status)1	-0.63	0.597	-1.056	0.291	1
AKT3	Breast Cancer	TMB	0.02	0.006	3.078	0.00208	0.035
AKT3	Breast Cancer	factor(sample_subtypes)Breast Invasive Cancer, NOS	13.464	1001.73	0.013	0.989	1
AKT3	Breast Cancer	factor(sample_subtypes)Breast Invasive Carcinoma, NOS	13.593	1001.73	0.014	0.989	1
AKT3	Breast Cancer	factor(sample_subtypes)Breast Invasive Ductal Carcinoma	13.282	1001.73	0.013	0.989	1
AKT3	Breast Cancer	factor(sample_subtypes)Breast Invasive Lobular Carcinoma	12.739	1001.73	0.013	0.99	1
AKT3	Breast Cancer	factor(sample_subtypes)Breast Invasive Mixed Mucinous Carcinoma	0.217	1601.83	0	1	1
AKT3	Breast Cancer	factor(sample_subtypes)Breast Mixed Ductal and Lobular Carcinoma	14.071	1001.73	0.014	0.989	1
AKT3	Breast Cancer	factor(sample_subtypes)Invasive Breast Carcinoma	13.466	1001.73	0.013	0.989	1
AKT3	Breast Cancer	factor(sample_subtypes)Metaplastic Breast Cancer	0.066	1379.77	0	1	1
AKT3	Breast Cancer	factor(sample_subtypes)others	14.273	1001.73	0.014	0.989	1
AKT3	Breast Cancer	factor(sample_all$sex)Male	0.777	1.022	0.76	0.447	1
AKT3	Breast Cancer	factor(sample_status)1	1.068	0.326	3.277	0.00105	0.0188
AKT3	Colorectal Cancer	factor(aya_status)1	0.916	0.277	3.306	0.000945	0.017
AKT3	Colorectal Cancer	TMB	0.022	0.002	11.316	1.09e-29	2.28e-27
AKT3	Colorectal Cancer	factor(sample_subtypes)Colorectal Adenocarcinoma	0.094	0.316	0.299	0.765	1
AKT3	Colorectal Cancer	factor(sample_subtypes)Mucinous Adenocarcinoma of the Colon and Rectum	0.151	0.563	0.268	0.789	1
AKT3	Colorectal Cancer	factor(sample_subtypes)others	-13.341	562.764	-0.024	0.981	1
AKT3	Colorectal Cancer	factor(sample_subtypes)Rectal Adenocarcinoma	-1.087	0.455	-2.391	0.0168	0.212
AKT3	Colorectal Cancer	factor(sample_subtypes)Signet Ring Cell Adenocarcinoma of the Colon and Rectum	-0.026	1.272	-0.02	0.984	1
AKT3	Colorectal Cancer	factor(sample_all$sex)Male	0.528	0.24	2.197	0.0281	0.319
AKT3	Colorectal Cancer	factor(sample_status)1	-0.15	0.264	-0.57	0.569	1
AKT3	Soft Tissue Sarcoma	factor(aya_status)1	-0.763	1.099	-0.695	0.487	1
AKT3	Soft Tissue Sarcoma	TMB	0.052	0.016	3.269	0.00108	0.0192
AKT3	Soft Tissue Sarcoma	factor(sample_subtypes)Alveolar Soft Part Sarcoma	0.231	11231.9	0	1	1
AKT3	Soft Tissue Sarcoma	factor(sample_subtypes)Angiosarcoma	-0.778	8077.71	0	1	1
AKT3	Soft Tissue Sarcoma	factor(sample_subtypes)Clear Cell Sarcoma	0.25	11385	0	1	1
AKT3	Soft Tissue Sarcoma	factor(sample_subtypes)Dedifferentiated Liposarcoma	16.575	6967.28	0.002	0.998	1
AKT3	Soft Tissue Sarcoma	factor(sample_subtypes)Desmoid/Aggressive Fibromatosis	-0.205	8952.83	0	1	1
AKT3	Soft Tissue Sarcoma	factor(sample_subtypes)Desmoplastic Small-Round-Cell Tumor	-0.219	8687.65	0	1	1
AKT3	Soft Tissue Sarcoma	factor(sample_subtypes)Embryonal Rhabdomyosarcoma	17.805	6967.28	0.003	0.998	1
AKT3	Soft Tissue Sarcoma	factor(sample_subtypes)Epithelioid Hemangioendothelioma	-0.16	9994.38	0	1	1
AKT3	Soft Tissue Sarcoma	factor(sample_subtypes)Epithelioid Sarcoma	-0.165	9976.67	0	1	1
AKT3	Soft Tissue Sarcoma	factor(sample_subtypes)Follicular Dendritic Cell Sarcoma	-0.731	14088.1	0	1	1
AKT3	Soft Tissue Sarcoma	factor(sample_subtypes)Hemangioma	-0.315	8228.6	0	1	1
AKT3	Soft Tissue Sarcoma	factor(sample_subtypes)Inflammatory Myofibroblastic Tumor	0.042	12175	0	1	1
AKT3	Soft Tissue Sarcoma	factor(sample_subtypes)Intimal Sarcoma	-0.192	12143.4	0	1	1
AKT3	Soft Tissue Sarcoma	factor(sample_subtypes)Leiomyosarcoma	18.286	6967.28	0.003	0.998	1
AKT3	Soft Tissue Sarcoma	factor(sample_subtypes)Liposarcoma	0.085	11618.7	0	1	1
AKT3	Soft Tissue Sarcoma	factor(sample_subtypes)Myxofibrosarcoma	-0.444	8861.36	0	1	1
AKT3	Soft Tissue Sarcoma	factor(sample_subtypes)Myxoid/Round-Cell Liposarcoma	-0.28	8849.53	0	1	1
AKT3	Soft Tissue Sarcoma	factor(sample_subtypes)others	-0.29	8159.93	0	1	1
AKT3	Soft Tissue Sarcoma	factor(sample_subtypes)Perivascular Epithelioid Cell Tumor	0.048	10199.3	0	1	1
AKT3	Soft Tissue Sarcoma	factor(sample_subtypes)Pleomorphic Liposarcoma	-0.332	10259.6	0	1	1
AKT3	Soft Tissue Sarcoma	factor(sample_subtypes)Radiation-Associated Sarcoma	0.027	13391.7	0	1	1
AKT3	Soft Tissue Sarcoma	factor(sample_subtypes)Rhabdomyosarcoma	17.983	6967.28	0.003	0.998	1
AKT3	Soft Tissue Sarcoma	factor(sample_subtypes)Round Cell Sarcoma, NOS	-0.226	10128.4	0	1	1
AKT3	Soft Tissue Sarcoma	factor(sample_subtypes)Sarcoma, NOS	16.504	6967.28	0.002	0.998	1
AKT3	Soft Tissue Sarcoma	factor(sample_subtypes)Soft Tissue Myoepithelial Carcinoma	0.106	13444.4	0	1	1
AKT3	Soft Tissue Sarcoma	factor(sample_subtypes)Solitary Fibrous Tumor/Hemangiopericytoma	-0.24	8463.59	0	1	1
AKT3	Soft Tissue Sarcoma	factor(sample_subtypes)Synovial Sarcoma	17.546	6967.28	0.003	0.998	1
AKT3	Soft Tissue Sarcoma	factor(sample_subtypes)Undifferentiated Pleomorphic Sarcoma/Malignant Fibrous Histiocytoma/High-Grade Spindle Cell Sarcoma	16.577	6967.28	0.002	0.998	1
AKT3	Soft Tissue Sarcoma	factor(sample_subtypes)Well-Differentiated Liposarcoma	-0.319	8656.44	0	1	1
AKT3	Soft Tissue Sarcoma	factor(sample_all$sex)Male	1.438	0.685	2.098	0.0359	0.385
AKT3	Soft Tissue Sarcoma	factor(sample_status)1	-0.592	0.683	-0.868	0.386	1
AKT3	Melanoma	factor(aya_status)1	-0.416	0.739	-0.563	0.574	1
AKT3	Melanoma	TMB	0.013	0.004	3.527	0.000421	0.00817
AKT3	Melanoma	factor(sample_subtypes)Anorectal Mucosal Melanoma	-16.583	1751.79	-0.009	0.992	1
AKT3	Melanoma	factor(sample_subtypes)Cutaneous Melanoma	-0.215	0.764	-0.281	0.779	1
AKT3	Melanoma	factor(sample_subtypes)Desmoplastic Melanoma	0.838	1.29	0.65	0.516	1
AKT3	Melanoma	factor(sample_subtypes)Head and Neck Mucosal Melanoma	-16.632	2016.2	-0.008	0.993	1
AKT3	Melanoma	factor(sample_subtypes)Melanoma	-0.022	0.772	-0.029	0.977	1
AKT3	Melanoma	factor(sample_subtypes)Melanoma of Unknown Primary	0.325	0.863	0.376	0.707	1
AKT3	Melanoma	factor(sample_subtypes)Mucosal Melanoma of the Vulva/Vagina	-16.81	2144.83	-0.008	0.994	1
AKT3	Melanoma	factor(sample_subtypes)Ocular Melanoma	-16.544	3842.13	-0.004	0.997	1
AKT3	Melanoma	factor(sample_subtypes)others	-16.691	2894.68	-0.006	0.995	1
AKT3	Melanoma	factor(sample_subtypes)Uveal Melanoma	-16.617	1307.47	-0.013	0.99	1
AKT3	Melanoma	factor(sample_all$sex)Male	-0.553	0.337	-1.644	0.1	0.772
AKT3	Melanoma	factor(sample_status)1	-0.396	0.348	-1.138	0.255	1
AKT3	Non-Small Cell Lung Cancer	factor(aya_status)1	0.248	0.727	0.34	0.734	1
AKT3	Non-Small Cell Lung Cancer	TMB	0.066	0.005	12.169	4.53e-34	1.47e-31
AKT3	Non-Small Cell Lung Cancer	factor(sample_subtypes)Large Cell Lung Carcinoma	-15.208	1633.91	-0.009	0.993	1
AKT3	Non-Small Cell Lung Cancer	factor(sample_subtypes)Large Cell Neuroendocrine Carcinoma	-0.772	1.243	-0.621	0.534	1
AKT3	Non-Small Cell Lung Cancer	factor(sample_subtypes)Lung Adenocarcinoma	-0.527	1.014	-0.519	0.603	1
AKT3	Non-Small Cell Lung Cancer	factor(sample_subtypes)Lung Adenosquamous Carcinoma	-0.311	1.43	-0.218	0.828	1
AKT3	Non-Small Cell Lung Cancer	factor(sample_subtypes)Lung Carcinoid	-14.221	542.837	-0.026	0.979	1
AKT3	Non-Small Cell Lung Cancer	factor(sample_subtypes)Lung Neuroendocrine Tumor	0.451	1.277	0.353	0.724	1
AKT3	Non-Small Cell Lung Cancer	factor(sample_subtypes)Lung Squamous Cell Carcinoma	-0.901	1.059	-0.85	0.395	1
AKT3	Non-Small Cell Lung Cancer	factor(sample_subtypes)Non-Small Cell Lung Cancer	0.149	1.047	0.142	0.887	1
AKT3	Non-Small Cell Lung Cancer	factor(sample_subtypes)others	-14.499	1061.9	-0.014	0.989	1
AKT3	Non-Small Cell Lung Cancer	factor(sample_subtypes)Pleomorphic Carcinoma of the Lung	-0.352	1.448	-0.243	0.808	1
AKT3	Non-Small Cell Lung Cancer	factor(sample_subtypes)Poorly Differentiated Non-Small Cell Lung Cancer	0.216	1.099	0.196	0.844	1
AKT3	Non-Small Cell Lung Cancer	factor(sample_subtypes)Sarcomatoid Carcinoma of the Lung	0.718	1.249	0.575	0.565	1
AKT3	Non-Small Cell Lung Cancer	factor(sample_all$sex)Male	-0.023	0.175	-0.13	0.896	1
AKT3	Non-Small Cell Lung Cancer	factor(sample_status)1	0	0.173	-0.001	0.999	1
AKT3	Ovarian Cancer	factor(aya_status)1	-0.401	1.674	-0.24	0.811	1
AKT3	Ovarian Cancer	TMB	0.024	0.006	3.849	0.000119	0.00255
AKT3	Ovarian Cancer	factor(sample_subtypes)Endometrioid Ovarian Cancer	1.392	1.748	0.796	0.426	1
AKT3	Ovarian Cancer	factor(sample_subtypes)High-Grade Serous Fallopian Tube Cancer	2.286	1.986	1.151	0.25	1
AKT3	Ovarian Cancer	factor(sample_subtypes)High-Grade Serous Ovarian Cancer	1.608	1.734	0.928	0.354	1
AKT3	Ovarian Cancer	factor(sample_subtypes)Low-Grade Serous Ovarian Cancer	-13.865	1304.33	-0.011	0.992	1
AKT3	Ovarian Cancer	factor(sample_subtypes)Mixed Ovarian Carcinoma	3.745	1.783	2.101	0.0357	0.383
AKT3	Ovarian Cancer	factor(sample_subtypes)Mucinous Ovarian Cancer	-13.919	2174.58	-0.006	0.995	1
AKT3	Ovarian Cancer	factor(sample_subtypes)others	-13.95	3035.17	-0.005	0.996	1
AKT3	Ovarian Cancer	factor(sample_subtypes)Ovarian Cancer, Other	3.502	1.833	1.91	0.0561	0.531
AKT3	Ovarian Cancer	factor(sample_subtypes)Ovarian Carcinosarcoma/Malignant Mixed Mesodermal Tumor	1.825	1.976	0.923	0.356	1
AKT3	Ovarian Cancer	factor(sample_subtypes)Ovarian Epithelial Tumor	-14.04	2358.8	-0.006	0.995	1
AKT3	Ovarian Cancer	factor(sample_subtypes)Serous Borderline Ovarian Tumor	-13.897	2988.34	-0.005	0.996	1
AKT3	Ovarian Cancer	factor(sample_subtypes)Serous Ovarian Cancer	1.948	1.973	0.987	0.324	1
AKT3	Ovarian Cancer	factor(sample_subtypes)Small Cell Carcinoma of the Ovary	-13.798	3683.96	-0.004	0.997	1
AKT3	Ovarian Cancer	factor(sample_status)1	-0.149	0.45	-0.331	0.74	1
AKT3	Cancer of Unknown Primary	factor(aya_status)1	0.701	0.799	0.876	0.381	1
AKT3	Cancer of Unknown Primary	TMB	0.036	0.005	6.847	7.52e-12	4.02e-10
AKT3	Cancer of Unknown Primary	factor(sample_subtypes)Cancer of Unknown Primary	0.619	0.741	0.835	0.404	1
AKT3	Cancer of Unknown Primary	factor(sample_subtypes)Cancer of Unknown Primary, NOS	1.076	0.888	1.211	0.226	1
AKT3	Cancer of Unknown Primary	factor(sample_subtypes)Neuroendocrine Carcinoma, NOS	0.243	1.182	0.206	0.837	1
AKT3	Cancer of Unknown Primary	factor(sample_subtypes)Neuroendocrine Tumor, NOS	0.888	0.943	0.941	0.347	1
AKT3	Cancer of Unknown Primary	factor(sample_subtypes)others	3.437	1.253	2.743	0.0061	0.0903
AKT3	Cancer of Unknown Primary	factor(sample_subtypes)Poorly Differentiated Carcinoma, NOS	0.508	0.88	0.578	0.563	1
AKT3	Cancer of Unknown Primary	factor(sample_subtypes)Small Cell Carcinoma of Unknown Primary	1.713	1.028	1.667	0.0956	0.749
AKT3	Cancer of Unknown Primary	factor(sample_subtypes)Squamous Cell Carcinoma, NOS	1.277	0.781	1.634	0.102	0.781
AKT3	Cancer of Unknown Primary	factor(sample_subtypes)Undifferentiated Malignant Neoplasm	-14.326	1057.51	-0.014	0.989	1
AKT3	Cancer of Unknown Primary	factor(sample_all$sex)Male	0.929	0.474	1.96	0.0501	0.49
AKT3	Cancer of Unknown Primary	factor(sample_all$sex)Unknown	0.335	10805.9	0	1	1
AKT3	Cancer of Unknown Primary	factor(sample_status)1	-0.026	0.457	-0.056	0.955	1
AKT3	Esophagogastric Cancer	factor(aya_status)1	-15.982	1439.45	-0.011	0.991	1
AKT3	Esophagogastric Cancer	TMB	0.031	0.008	3.929	8.53e-05	0.00188
AKT3	Esophagogastric Cancer	factor(sample_subtypes)Diffuse Type Stomach Adenocarcinoma	-16.164	3287.84	-0.005	0.996	1
AKT3	Esophagogastric Cancer	factor(sample_subtypes)Esophageal Adenocarcinoma	-0.001	0.535	-0.002	0.998	1
AKT3	Esophagogastric Cancer	factor(sample_subtypes)Esophageal Poorly Differentiated Carcinoma	1.267	0.859	1.475	0.14	0.93
AKT3	Esophagogastric Cancer	factor(sample_subtypes)Esophageal Squamous Cell Carcinoma	-16.271	1460.62	-0.011	0.991	1
AKT3	Esophagogastric Cancer	factor(sample_subtypes)Esophagogastric Adenocarcinoma	0.236	0.663	0.355	0.722	1
AKT3	Esophagogastric Cancer	factor(sample_subtypes)Intestinal Type Stomach Adenocarcinoma	0.88	1.123	0.784	0.433	1
AKT3	Esophagogastric Cancer	factor(sample_subtypes)others	1.313	1.149	1.142	0.253	1
AKT3	Esophagogastric Cancer	factor(sample_subtypes)Poorly Differentiated Carcinoma of the Stomach	-16.248	1782.35	-0.009	0.993	1
AKT3	Esophagogastric Cancer	factor(sample_subtypes)Signet Ring Cell Carcinoma of the Stomach	-15.89	1977.04	-0.008	0.994	1
AKT3	Esophagogastric Cancer	factor(sample_subtypes)Stomach Adenocarcinoma	-0.574	0.651	-0.882	0.378	1
AKT3	Esophagogastric Cancer	factor(sample_subtypes)Tubular Stomach Adenocarcinoma	1.06	1.134	0.934	0.35	1
AKT3	Esophagogastric Cancer	factor(sample_all$sex)Male	0.63	0.516	1.22	0.222	1
AKT3	Esophagogastric Cancer	factor(sample_status)1	-0.17	0.466	-0.365	0.715	1
AKT3	Hepatobiliary Cancer	factor(aya_status)1	-15.839	2559.32	-0.006	0.995	1
AKT3	Hepatobiliary Cancer	TMB	0.053	0.018	3.005	0.00266	0.0435
AKT3	Hepatobiliary Cancer	factor(sample_subtypes)Extrahepatic Cholangiocarcinoma	17.263	1754.47	0.01	0.992	1
AKT3	Hepatobiliary Cancer	factor(sample_subtypes)Fibrolamellar Carcinoma	1.931	4311.03	0	1	1
AKT3	Hepatobiliary Cancer	factor(sample_subtypes)Gallbladder Adenocarcinoma, NOS	0.076	3876.15	0	1	1
AKT3	Hepatobiliary Cancer	factor(sample_subtypes)Gallbladder Cancer	16.292	1754.47	0.009	0.993	1
AKT3	Hepatobiliary Cancer	factor(sample_subtypes)Hepatoblastoma	0.131	5506.95	0	1	1
AKT3	Hepatobiliary Cancer	factor(sample_subtypes)Hepatocellular Carcinoma	16.228	1754.47	0.009	0.993	1
AKT3	Hepatobiliary Cancer	factor(sample_subtypes)Hepatocellular Carcinoma plus Intrahepatic Cholangiocarcinoma	17.784	1754.47	0.01	0.992	1
AKT3	Hepatobiliary Cancer	factor(sample_subtypes)Intrahepatic Cholangiocarcinoma	16.487	1754.47	0.009	0.993	1
AKT3	Hepatobiliary Cancer	factor(sample_subtypes)others	-0.079	7293.51	0	1	1
AKT3	Hepatobiliary Cancer	factor(sample_subtypes)Perihilar Cholangiocarcinoma	0.201	6654.6	0	1	1
AKT3	Hepatobiliary Cancer	factor(sample_all$sex)Male	0.003	0.715	0.005	0.996	1
AKT3	Hepatobiliary Cancer	factor(sample_status)1	-0.32	0.848	-0.378	0.706	1
AKT3	Pancreatic Cancer	factor(aya_status)1	-15.65	2582.95	-0.006	0.995	1
AKT3	Pancreatic Cancer	TMB	0.026	0.021	1.244	0.214	1
AKT3	Pancreatic Cancer	factor(sample_subtypes)Adenosquamous Carcinoma of the Pancreas	0.158	5641.8	0	1	1
AKT3	Pancreatic Cancer	factor(sample_subtypes)Intraductal Papillary Mucinous Neoplasm	0.285	7410.44	0	1	1
AKT3	Pancreatic Cancer	factor(sample_subtypes)others	0.432	8706.53	0	1	1
AKT3	Pancreatic Cancer	factor(sample_subtypes)Pancreatic Adenocarcinoma	16.619	4010.57	0.004	0.997	1
AKT3	Pancreatic Cancer	factor(sample_subtypes)Pancreatic Neuroendocrine Tumor	-1.585	4173.33	0	1	1
AKT3	Pancreatic Cancer	factor(sample_subtypes)Solid Pseudopapillary Neoplasm of the Pancreas	0.389	7657.97	0	1	1
AKT3	Pancreatic Cancer	factor(sample_subtypes)Undifferentiated Carcinoma of the Pancreas	18.228	4010.57	0.005	0.996	1
AKT3	Pancreatic Cancer	factor(sample_all$sex)Male	0.049	0.452	0.108	0.914	1
AKT3	Pancreatic Cancer	factor(sample_status)1	0.45	0.451	0.997	0.319	1
AKT3	Mature B-Cell Neoplasms	factor(aya_status)1	-1.059	2.727	-0.388	0.698	1
AKT3	Mature B-Cell Neoplasms	TMB	0.067	0.028	2.351	0.0187	0.231
AKT3	Mature B-Cell Neoplasms	factor(sample_subtypes)Diffuse Large B-Cell Lymphoma, NOS	-2.021	1.646	-1.228	0.219	1
AKT3	Mature B-Cell Neoplasms	factor(sample_subtypes)Follicular Lymphoma	-0.195	1.26	-0.155	0.877	1
AKT3	Mature B-Cell Neoplasms	factor(sample_subtypes)Mantle Cell Lymphoma	-18.043	7814.68	-0.002	0.998	1
AKT3	Mature B-Cell Neoplasms	factor(sample_subtypes)Marginal Zone Lymphoma	-17.061	10167.5	-0.002	0.999	1
AKT3	Mature B-Cell Neoplasms	factor(sample_subtypes)Mature B-Cell Neoplasms	-17.92	4694.72	-0.004	0.997	1
AKT3	Mature B-Cell Neoplasms	factor(sample_subtypes)others	-17.891	5874.18	-0.003	0.998	1
AKT3	Mature B-Cell Neoplasms	factor(sample_subtypes)Plasma Cell Myeloma	0.592	1.017	0.582	0.561	1
AKT3	Mature B-Cell Neoplasms	factor(sample_all$sex)Male	17.993	2239.74	0.008	0.994	1
AKT3	Mature B-Cell Neoplasms	factor(sample_status)1	1.891	1.438	1.315	0.189	1
AKT3	Head and Neck Cancer	factor(aya_status)1	-16.231	3297.39	-0.005	0.996	1
AKT3	Head and Neck Cancer	TMB	0.043	0.011	4.017	5.88e-05	0.00134
AKT3	Head and Neck Cancer	factor(sample_subtypes)Head and Neck Neuroendocrine Carcinoma	-0.32	9303.81	0	1	1
AKT3	Head and Neck Cancer	factor(sample_subtypes)Head and Neck Squamous Cell Carcinoma	16.604	5991.81	0.003	0.998	1
AKT3	Head and Neck Cancer	factor(sample_subtypes)Head and Neck Squamous Cell Carcinoma of Unknown Primary	18.697	5991.81	0.003	0.998	1
AKT3	Head and Neck Cancer	factor(sample_subtypes)Hypopharynx Squamous Cell Carcinoma	-0.319	9257.44	0	1	1
AKT3	Head and Neck Cancer	factor(sample_subtypes)Larynx Squamous Cell Carcinoma	-0.398	6920.51	0	1	1
AKT3	Head and Neck Cancer	factor(sample_subtypes)Nasopharyngeal Carcinoma	-0.069	7172.82	0	1	1
AKT3	Head and Neck Cancer	factor(sample_subtypes)Oral Cavity Squamous Cell Carcinoma	16.125	5991.81	0.003	0.998	1
AKT3	Head and Neck Cancer	factor(sample_subtypes)Oropharynx Squamous Cell Carcinoma	16.567	5991.81	0.003	0.998	1
AKT3	Head and Neck Cancer	factor(sample_subtypes)others	0.282	7257.36	0	1	1
AKT3	Head and Neck Cancer	factor(sample_subtypes)Sinonasal Squamous Cell Carcinoma	18.844	5991.81	0.003	0.997	1
AKT3	Head and Neck Cancer	factor(sample_all$sex)Male	0.117	0.692	0.169	0.865	1
AKT3	Head and Neck Cancer	factor(sample_status)1	-0.461	0.625	-0.737	0.461	1
AKT3	Endometrial Cancer	factor(aya_status)1	-0.494	0.858	-0.575	0.565	1
AKT3	Endometrial Cancer	TMB	0.016	0.001	12.208	2.83e-34	9.43e-32
AKT3	Endometrial Cancer	factor(sample_subtypes)others	-14.511	995.897	-0.015	0.988	1
AKT3	Endometrial Cancer	factor(sample_subtypes)Uterine Carcinosarcoma/Uterine Malignant Mixed Mullerian Tumor	-0.637	0.997	-0.639	0.523	1
AKT3	Endometrial Cancer	factor(sample_subtypes)Uterine Clear Cell Carcinoma	1.275	0.783	1.628	0.104	0.786
AKT3	Endometrial Cancer	factor(sample_subtypes)Uterine Dedifferentiated Carcinoma	-13.964	1450.31	-0.01	0.992	1
AKT3	Endometrial Cancer	factor(sample_subtypes)Uterine Endometrioid Carcinoma	1.105	0.501	2.205	0.0275	0.315
AKT3	Endometrial Cancer	factor(sample_subtypes)Uterine Mixed Endometrial Carcinoma	-0.51	1.055	-0.483	0.629	1
AKT3	Endometrial Cancer	factor(sample_subtypes)Uterine Serous Carcinoma/Uterine Papillary Serous Carcinoma	-0.148	0.765	-0.193	0.847	1
AKT3	Endometrial Cancer	factor(sample_subtypes)Uterine Undifferentiated Carcinoma	2.557	0.957	2.673	0.00752	0.108
AKT3	Endometrial Cancer	factor(sample_status)1	0.046	0.358	0.129	0.897	1
AKT3	Skin Cancer, Non-Melanoma	factor(aya_status)1	0.822	1.193	0.689	0.491	1
AKT3	Skin Cancer, Non-Melanoma	TMB	0.025	0.005	4.866	1.14e-06	3.47e-05
AKT3	Skin Cancer, Non-Melanoma	factor(sample_subtypes)Basal Cell Carcinoma	16.81	1975.7	0.009	0.993	1
AKT3	Skin Cancer, Non-Melanoma	factor(sample_subtypes)Cutaneous Squamous Cell Carcinoma	16.824	1975.7	0.009	0.993	1
AKT3	Skin Cancer, Non-Melanoma	factor(sample_subtypes)Dermatofibrosarcoma Protuberans	0.094	3010.94	0	1	1
AKT3	Skin Cancer, Non-Melanoma	factor(sample_subtypes)Extramammary Paget Disease	0.371	2393.46	0	1	1
AKT3	Skin Cancer, Non-Melanoma	factor(sample_subtypes)Merkel Cell Carcinoma	15.443	1975.7	0.008	0.994	1
AKT3	Skin Cancer, Non-Melanoma	factor(sample_subtypes)others	0.333	3018.37	0	1	1
AKT3	Skin Cancer, Non-Melanoma	factor(sample_subtypes)Sebaceous Carcinoma	0.382	2916.84	0	1	1
AKT3	Skin Cancer, Non-Melanoma	factor(sample_subtypes)Skin Adnexal Carcinoma	-0.025	2928.11	0	1	1
AKT3	Skin Cancer, Non-Melanoma	factor(sample_all$sex)Male	0.175	0.498	0.351	0.726	1
AKT3	Skin Cancer, Non-Melanoma	factor(sample_status)1	-0.089	0.381	-0.234	0.815	1
AKT3	Bladder Cancer	factor(aya_status)1	-15.338	1825.98	-0.008	0.993	1
AKT3	Bladder Cancer	TMB	0.029	0.006	4.883	1.05e-06	3.21e-05
AKT3	Bladder Cancer	factor(sample_subtypes)Bladder Squamous Cell Carcinoma	-0.099	2755.06	0	1	1
AKT3	Bladder Cancer	factor(sample_subtypes)Bladder Urothelial Carcinoma	15.1	1384.66	0.011	0.991	1
AKT3	Bladder Cancer	factor(sample_subtypes)others	0.139	2084.63	0	1	1
AKT3	Bladder Cancer	factor(sample_subtypes)Plasmacytoid/Signet Ring Cell Bladder Carcinoma	-0.085	2919.68	0	1	1
AKT3	Bladder Cancer	factor(sample_subtypes)Small Cell Bladder Cancer	16.323	1384.66	0.012	0.991	1
AKT3	Bladder Cancer	factor(sample_subtypes)Upper Tract Urothelial Carcinoma	14.981	1384.66	0.011	0.991	1
AKT3	Bladder Cancer	factor(sample_subtypes)Urethral Urothelial Carcinoma	-0.768	2172.81	0	1	1
AKT3	Bladder Cancer	factor(sample_all$sex)Male	-0.716	0.425	-1.684	0.0921	0.733
AKT3	Bladder Cancer	factor(sample_status)1	0.241	0.47	0.513	0.608	1
ALK	Glioma	factor(aya_status)1	-0.401	0.265	-1.512	0.131	0.894
ALK	Glioma	TMB	0.026	0.002	11.334	8.85e-30	1.87e-27
ALK	Glioma	factor(sample_subtypes)Anaplastic Oligoastrocytoma	-15.459	942.804	-0.016	0.987	1
ALK	Glioma	factor(sample_subtypes)Anaplastic Oligodendroglioma	0.545	0.452	1.206	0.228	1
ALK	Glioma	factor(sample_subtypes)Anaplastic Pleomorphic Xanthoastrocytoma	-14.738	1418.03	-0.01	0.992	1
ALK	Glioma	factor(sample_subtypes)Astrocytoma	-0.633	0.599	-1.057	0.29	1
ALK	Glioma	factor(sample_subtypes)Diffuse Astrocytoma	0.409	0.603	0.678	0.497	1
ALK	Glioma	factor(sample_subtypes)Diffuse Glioma	0.156	0.601	0.26	0.795	1
ALK	Glioma	factor(sample_subtypes)Diffuse Intrinsic Pontine Glioma	-14.94	855.116	-0.017	0.986	1
ALK	Glioma	factor(sample_subtypes)Dysembryoplastic Neuroepithelial Tumor	-14.804	1494.11	-0.01	0.992	1
ALK	Glioma	factor(sample_subtypes)Encapsulated Glioma	-14.831	1228.56	-0.012	0.99	1
ALK	Glioma	factor(sample_subtypes)Ependymoma	-14.798	705.105	-0.021	0.983	1
ALK	Glioma	factor(sample_subtypes)Ganglioglioma	-0.766	1.056	-0.726	0.468	1
ALK	Glioma	factor(sample_subtypes)Glioblastoma	0.006	0.378	0.016	0.987	1
ALK	Glioma	factor(sample_subtypes)Glioblastoma Multiforme	-0.484	0.37	-1.31	0.19	1
ALK	Glioma	factor(sample_subtypes)Glioma, NOS	-0.605	1.057	-0.573	0.567	1
ALK	Glioma	factor(sample_subtypes)Gliosarcoma	-0.619	1.077	-0.575	0.565	1
ALK	Glioma	factor(sample_subtypes)High-Grade Glioma, NOS	-0.329	0.573	-0.574	0.566	1
ALK	Glioma	factor(sample_subtypes)Low-Grade Glioma, NOS	0.238	0.558	0.426	0.67	1
ALK	Glioma	factor(sample_subtypes)Oligoastrocytoma	0.316	1.086	0.291	0.771	1
ALK	Glioma	factor(sample_subtypes)Oligodendroglioma	0.066	0.488	0.136	0.892	1
ALK	Glioma	factor(sample_subtypes)others	-14.837	1419.98	-0.01	0.992	1
ALK	Glioma	factor(sample_subtypes)Pilocytic Astrocytoma	-0.995	0.785	-1.268	0.205	1
ALK	Glioma	factor(sample_subtypes)Pilomyxoid Astrocytoma	-14.984	1625.23	-0.009	0.993	1
ALK	Glioma	factor(sample_subtypes)Pleomorphic Xanthoastrocytoma	0.565	1.073	0.527	0.598	1
ALK	Glioma	factor(sample_all$sex)Male	-0.202	0.187	-1.08	0.28	1
ALK	Glioma	factor(sample_status)1	0.429	0.274	1.565	0.118	0.846
ALK	Breast Cancer	factor(aya_status)1	0.209	0.273	0.764	0.445	1
ALK	Breast Cancer	TMB	0.083	0.008	9.797	1.16e-22	1.38e-20
ALK	Breast Cancer	factor(sample_subtypes)Breast Invasive Cancer, NOS	-0.454	1.136	-0.399	0.69	1
ALK	Breast Cancer	factor(sample_subtypes)Breast Invasive Carcinoma, NOS	-0.583	1.095	-0.532	0.595	1
ALK	Breast Cancer	factor(sample_subtypes)Breast Invasive Ductal Carcinoma	-0.695	1.021	-0.681	0.496	1
ALK	Breast Cancer	factor(sample_subtypes)Breast Invasive Lobular Carcinoma	-0.34	1.039	-0.327	0.744	1
ALK	Breast Cancer	factor(sample_subtypes)Breast Invasive Mixed Mucinous Carcinoma	1.198	1.255	0.955	0.34	1
ALK	Breast Cancer	factor(sample_subtypes)Breast Mixed Ductal and Lobular Carcinoma	-0.105	1.084	-0.097	0.923	1
ALK	Breast Cancer	factor(sample_subtypes)Invasive Breast Carcinoma	-0.523	1.034	-0.506	0.613	1
ALK	Breast Cancer	factor(sample_subtypes)Metaplastic Breast Cancer	-0.136	1.433	-0.095	0.925	1
ALK	Breast Cancer	factor(sample_subtypes)others	-13.92	463.321	-0.03	0.976	1
ALK	Breast Cancer	factor(sample_all$sex)Male	-13.371	434.805	-0.031	0.975	1
ALK	Breast Cancer	factor(sample_status)1	-0.239	0.188	-1.276	0.202	1
ALK	Colorectal Cancer	factor(aya_status)1	-0.189	0.204	-0.928	0.354	1
ALK	Colorectal Cancer	TMB	0.034	0.002	17.334	2.63e-67	4.31e-64
ALK	Colorectal Cancer	factor(sample_subtypes)Colorectal Adenocarcinoma	-0.42	0.207	-2.032	0.0421	0.432
ALK	Colorectal Cancer	factor(sample_subtypes)Mucinous Adenocarcinoma of the Colon and Rectum	-0.408	0.355	-1.148	0.251	1
ALK	Colorectal Cancer	factor(sample_subtypes)others	-0.465	0.678	-0.686	0.493	1
ALK	Colorectal Cancer	factor(sample_subtypes)Rectal Adenocarcinoma	-0.071	0.163	-0.435	0.664	1
ALK	Colorectal Cancer	factor(sample_subtypes)Signet Ring Cell Adenocarcinoma of the Colon and Rectum	0.247	0.747	0.331	0.741	1
ALK	Colorectal Cancer	factor(sample_all$sex)Male	-0.107	0.117	-0.914	0.361	1
ALK	Colorectal Cancer	factor(sample_status)1	0.003	0.13	0.022	0.982	1
ALK	Soft Tissue Sarcoma	factor(aya_status)1	0.354	0.438	0.807	0.42	1
ALK	Soft Tissue Sarcoma	TMB	0.073	0.011	6.593	4.32e-11	2.18e-09
ALK	Soft Tissue Sarcoma	factor(sample_subtypes)Alveolar Soft Part Sarcoma	-0.074	4248.56	0	1	1
ALK	Soft Tissue Sarcoma	factor(sample_subtypes)Angiosarcoma	17.108	2632	0.007	0.995	1
ALK	Soft Tissue Sarcoma	factor(sample_subtypes)Clear Cell Sarcoma	-0.032	4298.68	0	1	1
ALK	Soft Tissue Sarcoma	factor(sample_subtypes)Dedifferentiated Liposarcoma	15.133	2632	0.006	0.995	1
ALK	Soft Tissue Sarcoma	factor(sample_subtypes)Desmoid/Aggressive Fibromatosis	16.197	2632	0.006	0.995	1
ALK	Soft Tissue Sarcoma	factor(sample_subtypes)Desmoplastic Small-Round-Cell Tumor	-0.102	3269.92	0	1	1
ALK	Soft Tissue Sarcoma	factor(sample_subtypes)Embryonal Rhabdomyosarcoma	16.22	2632	0.006	0.995	1
ALK	Soft Tissue Sarcoma	factor(sample_subtypes)Epithelioid Hemangioendothelioma	16.832	2632	0.006	0.995	1
ALK	Soft Tissue Sarcoma	factor(sample_subtypes)Epithelioid Sarcoma	16.669	2632	0.006	0.995	1
ALK	Soft Tissue Sarcoma	factor(sample_subtypes)Follicular Dendritic Cell Sarcoma	17.808	2632	0.007	0.995	1
ALK	Soft Tissue Sarcoma	factor(sample_subtypes)Hemangioma	17.09	2632	0.006	0.995	1
ALK	Soft Tissue Sarcoma	factor(sample_subtypes)Inflammatory Myofibroblastic Tumor	0.001	4594.31	0	1	1
ALK	Soft Tissue Sarcoma	factor(sample_subtypes)Intimal Sarcoma	17.368	2632	0.007	0.995	1
ALK	Soft Tissue Sarcoma	factor(sample_subtypes)Leiomyosarcoma	16.352	2632	0.006	0.995	1
ALK	Soft Tissue Sarcoma	factor(sample_subtypes)Liposarcoma	0.023	4408.09	0	1	1
ALK	Soft Tissue Sarcoma	factor(sample_subtypes)Myxofibrosarcoma	-0.042	3344.77	0	1	1
ALK	Soft Tissue Sarcoma	factor(sample_subtypes)Myxoid/Round-Cell Liposarcoma	-0.096	3344.73	0	1	1
ALK	Soft Tissue Sarcoma	factor(sample_subtypes)others	-0.103	3085.2	0	1	1
ALK	Soft Tissue Sarcoma	factor(sample_subtypes)Perivascular Epithelioid Cell Tumor	16.893	2632	0.006	0.995	1
ALK	Soft Tissue Sarcoma	factor(sample_subtypes)Pleomorphic Liposarcoma	-0.137	3882.45	0	1	1
ALK	Soft Tissue Sarcoma	factor(sample_subtypes)Radiation-Associated Sarcoma	17.751	2632	0.007	0.995	1
ALK	Soft Tissue Sarcoma	factor(sample_subtypes)Rhabdomyosarcoma	-0.158	3437.18	0	1	1
ALK	Soft Tissue Sarcoma	factor(sample_subtypes)Round Cell Sarcoma, NOS	16.8	2632	0.006	0.995	1
ALK	Soft Tissue Sarcoma	factor(sample_subtypes)Sarcoma, NOS	15.892	2632	0.006	0.995	1
ALK	Soft Tissue Sarcoma	factor(sample_subtypes)Soft Tissue Myoepithelial Carcinoma	-0.476	4965.03	0	1	1
ALK	Soft Tissue Sarcoma	factor(sample_subtypes)Solitary Fibrous Tumor/Hemangiopericytoma	16.076	2632	0.006	0.995	1
ALK	Soft Tissue Sarcoma	factor(sample_subtypes)Synovial Sarcoma	16.25	2632	0.006	0.995	1
ALK	Soft Tissue Sarcoma	factor(sample_subtypes)Undifferentiated Pleomorphic Sarcoma/Malignant Fibrous Histiocytoma/High-Grade Spindle Cell Sarcoma	16.252	2632	0.006	0.995	1
ALK	Soft Tissue Sarcoma	factor(sample_subtypes)Well-Differentiated Liposarcoma	0.138	3271.09	0	1	1
ALK	Soft Tissue Sarcoma	factor(sample_all$sex)Male	0.191	0.346	0.551	0.582	1
ALK	Soft Tissue Sarcoma	factor(sample_status)1	-0.167	0.401	-0.416	0.678	1
ALK	Melanoma	factor(aya_status)1	-0.992	0.406	-2.442	0.0146	0.19
ALK	Melanoma	TMB	0.036	0.003	13.373	8.75e-41	4.46e-38
ALK	Melanoma	factor(sample_subtypes)Anorectal Mucosal Melanoma	-12.727	392.137	-0.032	0.974	1
ALK	Melanoma	factor(sample_subtypes)Cutaneous Melanoma	2.153	1.012	2.128	0.0333	0.364
ALK	Melanoma	factor(sample_subtypes)Desmoplastic Melanoma	2.872	1.172	2.45	0.0143	0.186
ALK	Melanoma	factor(sample_subtypes)Head and Neck Mucosal Melanoma	1.242	1.235	1.005	0.315	1
ALK	Melanoma	factor(sample_subtypes)Melanoma	2.336	1.013	2.307	0.0211	0.255
ALK	Melanoma	factor(sample_subtypes)Melanoma of Unknown Primary	2.194	1.028	2.134	0.0329	0.36
ALK	Melanoma	factor(sample_subtypes)Mucosal Melanoma of the Vulva/Vagina	0.602	1.425	0.423	0.673	1
ALK	Melanoma	factor(sample_subtypes)Ocular Melanoma	-12.69	860.427	-0.015	0.988	1
ALK	Melanoma	factor(sample_subtypes)others	2.465	1.142	2.159	0.0309	0.344
ALK	Melanoma	factor(sample_subtypes)Uveal Melanoma	0.459	1.231	0.373	0.709	1
ALK	Melanoma	factor(sample_all$sex)Male	-0.062	0.145	-0.425	0.671	1
ALK	Melanoma	factor(sample_status)1	0.122	0.151	0.81	0.418	1
ALK	Thyroid Cancer	factor(aya_status)1	-0.941	1.062	-0.885	0.376	1
ALK	Thyroid Cancer	TMB	0.257	0.057	4.495	6.97e-06	0.000187
ALK	Thyroid Cancer	factor(sample_subtypes)Follicular Thyroid Cancer	-16.543	4258.28	-0.004	0.997	1
ALK	Thyroid Cancer	factor(sample_subtypes)Hurthle Cell Thyroid Cancer	0.397	1.268	0.313	0.755	1
ALK	Thyroid Cancer	factor(sample_subtypes)Medullary Thyroid Cancer	1.448	1.001	1.446	0.148	0.958
ALK	Thyroid Cancer	factor(sample_subtypes)others	-17.023	7581.61	-0.002	0.998	1
ALK	Thyroid Cancer	factor(sample_subtypes)Papillary Thyroid Cancer	0.541	0.877	0.617	0.537	1
ALK	Thyroid Cancer	factor(sample_subtypes)Poorly Differentiated Thyroid Cancer	-29.46	1474.93	-0.02	0.984	1
ALK	Thyroid Cancer	factor(sample_all$sex)Male	-1.705	0.722	-2.361	0.0182	0.227
ALK	Thyroid Cancer	factor(sample_status)1	0.467	0.544	0.858	0.391	1
ALK	Non-Small Cell Lung Cancer	factor(aya_status)1	0.395	0.378	1.045	0.296	1
ALK	Non-Small Cell Lung Cancer	TMB	0.074	0.004	18.405	1.19e-75	2.65e-72
ALK	Non-Small Cell Lung Cancer	factor(sample_subtypes)Large Cell Lung Carcinoma	-11.296	217.536	-0.052	0.959	1
ALK	Non-Small Cell Lung Cancer	factor(sample_subtypes)Large Cell Neuroendocrine Carcinoma	0.569	1.08	0.527	0.598	1
ALK	Non-Small Cell Lung Cancer	factor(sample_subtypes)Lung Adenocarcinoma	0.832	1.01	0.824	0.41	1
ALK	Non-Small Cell Lung Cancer	factor(sample_subtypes)Lung Adenosquamous Carcinoma	1.123	1.138	0.987	0.324	1
ALK	Non-Small Cell Lung Cancer	factor(sample_subtypes)Lung Carcinoid	0.146	1.235	0.119	0.906	1
ALK	Non-Small Cell Lung Cancer	factor(sample_subtypes)Lung Neuroendocrine Tumor	0.325	1.289	0.252	0.801	1
ALK	Non-Small Cell Lung Cancer	factor(sample_subtypes)Lung Squamous Cell Carcinoma	0.924	1.018	0.908	0.364	1
ALK	Non-Small Cell Lung Cancer	factor(sample_subtypes)Non-Small Cell Lung Cancer	0.955	1.026	0.93	0.352	1
ALK	Non-Small Cell Lung Cancer	factor(sample_subtypes)others	0.484	1.433	0.338	0.736	1
ALK	Non-Small Cell Lung Cancer	factor(sample_subtypes)Pleomorphic Carcinoma of the Lung	1.167	1.154	1.011	0.312	1
ALK	Non-Small Cell Lung Cancer	factor(sample_subtypes)Poorly Differentiated Non-Small Cell Lung Cancer	0.864	1.058	0.817	0.414	1
ALK	Non-Small Cell Lung Cancer	factor(sample_subtypes)Sarcomatoid Carcinoma of the Lung	1.401	1.146	1.223	0.221	1
ALK	Non-Small Cell Lung Cancer	factor(sample_all$sex)Male	0.057	0.095	0.607	0.544	1
ALK	Non-Small Cell Lung Cancer	factor(sample_status)1	0.165	0.094	1.758	0.0788	0.664
ALK	Ovarian Cancer	factor(aya_status)1	-1.097	1.011	-1.084	0.278	1
ALK	Ovarian Cancer	TMB	0.025	0.006	4.162	3.16e-05	0.000752
ALK	Ovarian Cancer	factor(sample_subtypes)Endometrioid Ovarian Cancer	-0.369	0.738	-0.5	0.617	1
ALK	Ovarian Cancer	factor(sample_subtypes)High-Grade Serous Fallopian Tube Cancer	-0.616	1.108	-0.556	0.578	1
ALK	Ovarian Cancer	factor(sample_subtypes)High-Grade Serous Ovarian Cancer	0.024	0.488	0.049	0.961	1
ALK	Ovarian Cancer	factor(sample_subtypes)Low-Grade Serous Ovarian Cancer	0.294	0.653	0.45	0.653	1
ALK	Ovarian Cancer	factor(sample_subtypes)Mixed Ovarian Carcinoma	-0.298	1.111	-0.268	0.789	1
ALK	Ovarian Cancer	factor(sample_subtypes)Mucinous Ovarian Cancer	-14.656	790.908	-0.019	0.985	1
ALK	Ovarian Cancer	factor(sample_subtypes)others	0.268	1.116	0.24	0.81	1
ALK	Ovarian Cancer	factor(sample_subtypes)Ovarian Cancer, Other	-0.307	1.217	-0.252	0.801	1
ALK	Ovarian Cancer	factor(sample_subtypes)Ovarian Carcinosarcoma/Malignant Mixed Mesodermal Tumor	-0.382	0.849	-0.45	0.653	1
ALK	Ovarian Cancer	factor(sample_subtypes)Ovarian Epithelial Tumor	-14.913	863.372	-0.017	0.986	1
ALK	Ovarian Cancer	factor(sample_subtypes)Serous Borderline Ovarian Tumor	0.379	1.124	0.337	0.736	1
ALK	Ovarian Cancer	factor(sample_subtypes)Serous Ovarian Cancer	-0.245	0.85	-0.288	0.773	1
ALK	Ovarian Cancer	factor(sample_subtypes)Small Cell Carcinoma of the Ovary	-14.442	1335.99	-0.011	0.991	1
ALK	Ovarian Cancer	factor(sample_status)1	-0.12	0.252	-0.477	0.634	1
ALK	Cancer of Unknown Primary	factor(aya_status)1	-2.385	1.375	-1.735	0.0827	0.684
ALK	Cancer of Unknown Primary	TMB	0.058	0.005	11.283	1.6e-29	3.32e-27
ALK	Cancer of Unknown Primary	factor(sample_subtypes)Cancer of Unknown Primary	0.078	0.35	0.224	0.823	1
ALK	Cancer of Unknown Primary	factor(sample_subtypes)Cancer of Unknown Primary, NOS	0.511	0.462	1.108	0.268	1
ALK	Cancer of Unknown Primary	factor(sample_subtypes)Neuroendocrine Carcinoma, NOS	0.426	0.5	0.852	0.394	1
ALK	Cancer of Unknown Primary	factor(sample_subtypes)Neuroendocrine Tumor, NOS	-0.484	0.642	-0.754	0.451	1
ALK	Cancer of Unknown Primary	factor(sample_subtypes)others	-12.043	466.272	-0.026	0.979	1
ALK	Cancer of Unknown Primary	factor(sample_subtypes)Poorly Differentiated Carcinoma, NOS	0.537	0.384	1.399	0.162	1
ALK	Cancer of Unknown Primary	factor(sample_subtypes)Small Cell Carcinoma of Unknown Primary	0.365	0.784	0.466	0.642	1
ALK	Cancer of Unknown Primary	factor(sample_subtypes)Squamous Cell Carcinoma, NOS	0.253	0.426	0.595	0.552	1
ALK	Cancer of Unknown Primary	factor(sample_subtypes)Undifferentiated Malignant Neoplasm	0.126	0.628	0.2	0.841	1
ALK	Cancer of Unknown Primary	factor(sample_all$sex)Male	0.077	0.235	0.326	0.744	1
ALK	Cancer of Unknown Primary	factor(sample_all$sex)Unknown	-9.54	1455.4	-0.007	0.995	1
ALK	Cancer of Unknown Primary	factor(sample_status)1	-0.28	0.248	-1.126	0.26	1
ALK	Esophagogastric Cancer	factor(aya_status)1	-1.31	1.016	-1.288	0.198	1
ALK	Esophagogastric Cancer	TMB	0.055	0.006	8.649	5.17e-18	4.25e-16
ALK	Esophagogastric Cancer	factor(sample_subtypes)Diffuse Type Stomach Adenocarcinoma	-14.022	740.285	-0.019	0.985	1
ALK	Esophagogastric Cancer	factor(sample_subtypes)Esophageal Adenocarcinoma	0.254	0.358	0.709	0.478	1
ALK	Esophagogastric Cancer	factor(sample_subtypes)Esophageal Poorly Differentiated Carcinoma	0.43	0.793	0.542	0.588	1
ALK	Esophagogastric Cancer	factor(sample_subtypes)Esophageal Squamous Cell Carcinoma	-0.461	0.665	-0.694	0.488	1
ALK	Esophagogastric Cancer	factor(sample_subtypes)Esophagogastric Adenocarcinoma	0.2	0.457	0.437	0.662	1
ALK	Esophagogastric Cancer	factor(sample_subtypes)Intestinal Type Stomach Adenocarcinoma	-0.301	1.106	-0.272	0.786	1
ALK	Esophagogastric Cancer	factor(sample_subtypes)others	-0.066	1.228	-0.054	0.957	1
ALK	Esophagogastric Cancer	factor(sample_subtypes)Poorly Differentiated Carcinoma of the Stomach	-0.889	0.861	-1.033	0.302	1
ALK	Esophagogastric Cancer	factor(sample_subtypes)Signet Ring Cell Carcinoma of the Stomach	0.462	0.678	0.681	0.496	1
ALK	Esophagogastric Cancer	factor(sample_subtypes)Stomach Adenocarcinoma	-0.536	0.42	-1.277	0.202	1
ALK	Esophagogastric Cancer	factor(sample_subtypes)Tubular Stomach Adenocarcinoma	-14.767	919.839	-0.016	0.987	1
ALK	Esophagogastric Cancer	factor(sample_all$sex)Male	0.16	0.281	0.569	0.57	1
ALK	Esophagogastric Cancer	factor(sample_status)1	0.349	0.263	1.326	0.185	1
ALK	Renal Cell Carcinoma	factor(aya_status)1	-0.68	1.067	-0.637	0.524	1
ALK	Renal Cell Carcinoma	TMB	0.098	0.028	3.449	0.000564	0.0107
ALK	Renal Cell Carcinoma	factor(sample_subtypes)Collecting Duct Renal Cell Carcinoma	16.397	1196.32	0.014	0.989	1
ALK	Renal Cell Carcinoma	factor(sample_subtypes)FH-Deficient Renal Cell Carcinoma	0.065	2981.91	0	1	1
ALK	Renal Cell Carcinoma	factor(sample_subtypes)others	15.418	1196.32	0.013	0.99	1
ALK	Renal Cell Carcinoma	factor(sample_subtypes)Papillary Renal Cell Carcinoma	15.674	1196.32	0.013	0.99	1
ALK	Renal Cell Carcinoma	factor(sample_subtypes)Renal Angiomyolipoma	0.016	2487.14	0	1	1
ALK	Renal Cell Carcinoma	factor(sample_subtypes)Renal Cell Carcinoma	15.078	1196.32	0.013	0.99	1
ALK	Renal Cell Carcinoma	factor(sample_subtypes)Renal Clear Cell Carcinoma	15.292	1196.32	0.013	0.99	1
ALK	Renal Cell Carcinoma	factor(sample_subtypes)Renal Medullary Carcinoma	0.429	3002.86	0	1	1
ALK	Renal Cell Carcinoma	factor(sample_subtypes)Renal Non-Clear Cell Carcinoma	16.604	1196.32	0.014	0.989	1
ALK	Renal Cell Carcinoma	factor(sample_subtypes)Renal Oncocytoma	16.025	1196.32	0.013	0.989	1
ALK	Renal Cell Carcinoma	factor(sample_subtypes)Sarcomatoid Renal Cell Carcinoma	16.396	1196.32	0.014	0.989	1
ALK	Renal Cell Carcinoma	factor(sample_subtypes)Translocation-Associated Renal Cell Carcinoma	16.222	1196.32	0.014	0.989	1
ALK	Renal Cell Carcinoma	factor(sample_subtypes)Unclassified Renal Cell Carcinoma	14.036	1196.32	0.012	0.991	1
ALK	Renal Cell Carcinoma	factor(sample_all$sex)Male	-0.154	0.451	-0.342	0.733	1
ALK	Renal Cell Carcinoma	factor(sample_status)1	-0.272	0.464	-0.585	0.558	1
ALK	Hepatobiliary Cancer	factor(aya_status)1	-0.617	1.032	-0.598	0.55	1
ALK	Hepatobiliary Cancer	TMB	0.053	0.012	4.337	1.45e-05	0.000367
ALK	Hepatobiliary Cancer	factor(sample_subtypes)Extrahepatic Cholangiocarcinoma	-0.56	0.835	-0.67	0.503	1
ALK	Hepatobiliary Cancer	factor(sample_subtypes)Fibrolamellar Carcinoma	-15.063	1669.87	-0.009	0.993	1
ALK	Hepatobiliary Cancer	factor(sample_subtypes)Gallbladder Adenocarcinoma, NOS	-15.777	1271.47	-0.012	0.99	1
ALK	Hepatobiliary Cancer	factor(sample_subtypes)Gallbladder Cancer	-0.531	0.732	-0.725	0.469	1
ALK	Hepatobiliary Cancer	factor(sample_subtypes)Hepatoblastoma	1.419	0.859	1.651	0.0988	0.765
ALK	Hepatobiliary Cancer	factor(sample_subtypes)Hepatocellular Carcinoma	0.357	0.547	0.652	0.514	1
ALK	Hepatobiliary Cancer	factor(sample_subtypes)Hepatocellular Carcinoma plus Intrahepatic Cholangiocarcinoma	-15.703	1570.3	-0.01	0.992	1
ALK	Hepatobiliary Cancer	factor(sample_subtypes)Intrahepatic Cholangiocarcinoma	-0.043	0.535	-0.081	0.935	1
ALK	Hepatobiliary Cancer	factor(sample_subtypes)others	-15.925	2618.36	-0.006	0.995	1
ALK	Hepatobiliary Cancer	factor(sample_subtypes)Perihilar Cholangiocarcinoma	0.975	1.112	0.876	0.381	1
ALK	Hepatobiliary Cancer	factor(sample_all$sex)Male	-0.289	0.373	-0.775	0.438	1
ALK	Hepatobiliary Cancer	factor(sample_status)1	0.164	0.404	0.406	0.685	1
ALK	Cervical Cancer	factor(aya_status)1	0.504	0.905	0.558	0.577	1
ALK	Cervical Cancer	TMB	0.179	0.05	3.594	0.000325	0.00645
ALK	Cervical Cancer	factor(sample_subtypes)Cervical Adenosquamous Carcinoma	-18.215	2809.78	-0.006	0.995	1
ALK	Cervical Cancer	factor(sample_subtypes)Cervical Squamous Cell Carcinoma	-1.223	1.244	-0.984	0.325	1
ALK	Cervical Cancer	factor(sample_subtypes)Endocervical Adenocarcinoma	-0.377	1.282	-0.294	0.769	1
ALK	Cervical Cancer	factor(sample_subtypes)Gastric Type Mucinous Carcinoma	-16.476	3098.49	-0.005	0.996	1
ALK	Cervical Cancer	factor(sample_subtypes)others	-0.307	1.479	-0.207	0.836	1
ALK	Cervical Cancer	factor(sample_all$sex)Male	-16.594	11988.5	-0.001	0.999	1
ALK	Cervical Cancer	factor(sample_status)1	0.742	0.801	0.927	0.354	1
ALK	Pancreatic Cancer	factor(aya_status)1	-14.878	994.241	-0.015	0.988	1
ALK	Pancreatic Cancer	TMB	0.05	0.008	6.354	2.1e-10	9.93e-09
ALK	Pancreatic Cancer	factor(sample_subtypes)Adenosquamous Carcinoma of the Pancreas	-16.223	1461.81	-0.011	0.991	1
ALK	Pancreatic Cancer	factor(sample_subtypes)Intraductal Papillary Mucinous Neoplasm	-16.176	2291.2	-0.007	0.994	1
ALK	Pancreatic Cancer	factor(sample_subtypes)others	-16.002	2838.61	-0.006	0.996	1
ALK	Pancreatic Cancer	factor(sample_subtypes)Pancreatic Adenocarcinoma	-0.888	0.753	-1.179	0.238	1
ALK	Pancreatic Cancer	factor(sample_subtypes)Pancreatic Neuroendocrine Tumor	-3.143	1.288	-2.439	0.0147	0.191
ALK	Pancreatic Cancer	factor(sample_subtypes)Solid Pseudopapillary Neoplasm of the Pancreas	0.69	1.281	0.538	0.59	1
ALK	Pancreatic Cancer	factor(sample_subtypes)Undifferentiated Carcinoma of the Pancreas	-0.135	1.257	-0.108	0.914	1
ALK	Pancreatic Cancer	factor(sample_all$sex)Male	-0.005	0.293	-0.017	0.986	1
ALK	Pancreatic Cancer	factor(sample_status)1	0.118	0.295	0.401	0.689	1
ALK	CNS Cancer	factor(aya_status)1	-17.348	2843.46	-0.006	0.995	1
ALK	CNS Cancer	TMB	0.415	0.137	3.018	0.00254	0.0417
ALK	CNS Cancer	factor(sample_subtypes)Anaplastic Meningioma	-2.52	5391.9	0	1	1
ALK	CNS Cancer	factor(sample_subtypes)Atypical Meningioma	17.653	3251.94	0.005	0.996	1
ALK	CNS Cancer	factor(sample_subtypes)Meningioma	17.338	3251.94	0.005	0.996	1
ALK	CNS Cancer	factor(sample_subtypes)others	17.316	3251.94	0.005	0.996	1
ALK	CNS Cancer	factor(sample_all$sex)Male	-0.277	0.747	-0.371	0.711	1
ALK	CNS Cancer	factor(sample_status)1	0.271	1.142	0.237	0.813	1
ALK	Mature B-Cell Neoplasms	factor(aya_status)1	-1.533	1.331	-1.152	0.25	1
ALK	Mature B-Cell Neoplasms	TMB	0.033	0.016	2.045	0.0409	0.422
ALK	Mature B-Cell Neoplasms	factor(sample_subtypes)Diffuse Large B-Cell Lymphoma, NOS	0.271	0.561	0.484	0.629	1
ALK	Mature B-Cell Neoplasms	factor(sample_subtypes)Follicular Lymphoma	-1.164	1.089	-1.069	0.285	1
ALK	Mature B-Cell Neoplasms	factor(sample_subtypes)Mantle Cell Lymphoma	-14.965	1133.59	-0.013	0.989	1
ALK	Mature B-Cell Neoplasms	factor(sample_subtypes)Marginal Zone Lymphoma	-14.781	1529.81	-0.01	0.992	1
ALK	Mature B-Cell Neoplasms	factor(sample_subtypes)Mature B-Cell Neoplasms	0.488	0.728	0.67	0.503	1
ALK	Mature B-Cell Neoplasms	factor(sample_subtypes)others	0.411	0.834	0.492	0.623	1
ALK	Mature B-Cell Neoplasms	factor(sample_subtypes)Plasma Cell Myeloma	-0.097	0.716	-0.136	0.892	1
ALK	Mature B-Cell Neoplasms	factor(sample_all$sex)Male	0.364	0.44	0.827	0.408	1
ALK	Mature B-Cell Neoplasms	factor(sample_status)1	-0.006	0.783	-0.008	0.994	1
ALK	Head and Neck Cancer	factor(aya_status)1	-16.347	1292.55	-0.013	0.99	1
ALK	Head and Neck Cancer	TMB	0.05	0.01	5.23	1.69e-07	5.83e-06
ALK	Head and Neck Cancer	factor(sample_subtypes)Head and Neck Neuroendocrine Carcinoma	16.516	2204.72	0.007	0.994	1
ALK	Head and Neck Cancer	factor(sample_subtypes)Head and Neck Squamous Cell Carcinoma	15.508	2204.71	0.007	0.994	1
ALK	Head and Neck Cancer	factor(sample_subtypes)Head and Neck Squamous Cell Carcinoma of Unknown Primary	15.801	2204.71	0.007	0.994	1
ALK	Head and Neck Cancer	factor(sample_subtypes)Hypopharynx Squamous Cell Carcinoma	-0.265	3410.36	0	1	1
ALK	Head and Neck Cancer	factor(sample_subtypes)Larynx Squamous Cell Carcinoma	14.97	2204.72	0.007	0.995	1
ALK	Head and Neck Cancer	factor(sample_subtypes)Nasopharyngeal Carcinoma	16.13	2204.71	0.007	0.994	1
ALK	Head and Neck Cancer	factor(sample_subtypes)Oral Cavity Squamous Cell Carcinoma	16.271	2204.71	0.007	0.994	1
ALK	Head and Neck Cancer	factor(sample_subtypes)Oropharynx Squamous Cell Carcinoma	16.277	2204.71	0.007	0.994	1
ALK	Head and Neck Cancer	factor(sample_subtypes)others	16.715	2204.71	0.008	0.994	1
ALK	Head and Neck Cancer	factor(sample_subtypes)Sinonasal Squamous Cell Carcinoma	-0.555	2882.45	0	1	1
ALK	Head and Neck Cancer	factor(sample_all$sex)Male	-0.04	0.362	-0.111	0.912	1
ALK	Head and Neck Cancer	factor(sample_status)1	0.022	0.335	0.067	0.947	1
ALK	Endometrial Cancer	factor(aya_status)1	-1.851	0.962	-1.923	0.0545	0.52
ALK	Endometrial Cancer	TMB	0.021	0.002	11.804	3.74e-32	9.55e-30
ALK	Endometrial Cancer	factor(sample_subtypes)others	-0.258	0.96	-0.268	0.788	1
ALK	Endometrial Cancer	factor(sample_subtypes)Uterine Carcinosarcoma/Uterine Malignant Mixed Mullerian Tumor	-0.748	0.491	-1.522	0.128	0.885
ALK	Endometrial Cancer	factor(sample_subtypes)Uterine Clear Cell Carcinoma	0.413	0.499	0.827	0.408	1
ALK	Endometrial Cancer	factor(sample_subtypes)Uterine Dedifferentiated Carcinoma	-0.2	1.064	-0.188	0.851	1
ALK	Endometrial Cancer	factor(sample_subtypes)Uterine Endometrioid Carcinoma	0.057	0.288	0.197	0.844	1
ALK	Endometrial Cancer	factor(sample_subtypes)Uterine Mixed Endometrial Carcinoma	-0.204	0.579	-0.353	0.724	1
ALK	Endometrial Cancer	factor(sample_subtypes)Uterine Serous Carcinoma/Uterine Papillary Serous Carcinoma	-1.202	0.491	-2.449	0.0143	0.187
ALK	Endometrial Cancer	factor(sample_subtypes)Uterine Undifferentiated Carcinoma	-0.36	1.228	-0.293	0.769	1
ALK	Endometrial Cancer	factor(sample_status)1	0.185	0.229	0.807	0.419	1
ALK	Sellar Tumor	factor(aya_status)1	-17.167	3380.78	-0.005	0.996	1
ALK	Sellar Tumor	TMB	0.212	0.195	1.084	0.279	1
ALK	Sellar Tumor	factor(sample_subtypes)others	-0.185	7413.83	0	1	1
ALK	Sellar Tumor	factor(sample_subtypes)Pituitary Adenoma	17.559	5597.78	0.003	0.997	1
ALK	Sellar Tumor	factor(sample_all$sex)Male	1.445	1.137	1.27	0.204	1
ALK	Sellar Tumor	factor(sample_status)1	0.598	1.16	0.515	0.606	1
ALK	Salivary Gland Cancer	factor(aya_status)1	-17.084	3592.11	-0.005	0.996	1
ALK	Salivary Gland Cancer	TMB	0.085	0.039	2.173	0.0297	0.334
ALK	Salivary Gland Cancer	factor(sample_subtypes)Adenoid Cystic Carcinoma	-0.061	5468.75	0	1	1
ALK	Salivary Gland Cancer	factor(sample_subtypes)Mammary Analogue Secretory Carcinoma of Salivary Gland Origin	-0.111	8042.63	0	1	1
ALK	Salivary Gland Cancer	factor(sample_subtypes)Mucoepidermoid Carcinoma	18.311	5163.15	0.004	0.997	1
ALK	Salivary Gland Cancer	factor(sample_subtypes)Myoepithelial Carcinoma	0.263	8177.25	0	1	1
ALK	Salivary Gland Cancer	factor(sample_subtypes)others	0.111	29684.9	0	1	1
ALK	Salivary Gland Cancer	factor(sample_subtypes)Salivary Adenocarcinoma	18.382	5163.15	0.004	0.997	1
ALK	Salivary Gland Cancer	factor(sample_subtypes)Salivary Carcinoma	-0.292	7342.23	0	1	1
ALK	Salivary Gland Cancer	factor(sample_subtypes)Salivary Carcinoma, Other	18.81	5163.15	0.004	0.997	1
ALK	Salivary Gland Cancer	factor(sample_subtypes)Salivary Duct Carcinoma	18.537	5163.15	0.004	0.997	1
ALK	Salivary Gland Cancer	factor(sample_all$sex)Male	-0.725	0.766	-0.946	0.344	1
ALK	Salivary Gland Cancer	factor(sample_status)1	0.66	0.717	0.92	0.357	1
ALK	Appendiceal Cancer	factor(aya_status)1	0.112	1.095	0.102	0.919	1
ALK	Appendiceal Cancer	TMB	0.073	0.039	1.867	0.062	0.568
ALK	Appendiceal Cancer	factor(sample_subtypes)Goblet Cell Carcinoid of the Appendix	0.954	1.263	0.755	0.45	1
ALK	Appendiceal Cancer	factor(sample_subtypes)Mucinous Adenocarcinoma of the Appendix	0.188	0.937	0.201	0.841	1
ALK	Appendiceal Cancer	factor(sample_subtypes)others	2.448	1.326	1.847	0.0648	0.585
ALK	Appendiceal Cancer	factor(sample_subtypes)Signet Ring Cell Type of the Appendix	2.564	0.97	2.644	0.0082	0.117
ALK	Appendiceal Cancer	factor(sample_all$sex)Male	0.762	0.687	1.11	0.267	1
ALK	Appendiceal Cancer	factor(sample_status)1	0.628	0.746	0.843	0.399	1
ALK	Skin Cancer, Non-Melanoma	factor(aya_status)1	-0.629	1.119	-0.562	0.574	1
ALK	Skin Cancer, Non-Melanoma	TMB	0.043	0.006	7.718	1.19e-14	7.73e-13
ALK	Skin Cancer, Non-Melanoma	factor(sample_subtypes)Basal Cell Carcinoma	-2.133	1.006	-2.121	0.034	0.369
ALK	Skin Cancer, Non-Melanoma	factor(sample_subtypes)Cutaneous Squamous Cell Carcinoma	-0.752	0.859	-0.875	0.382	1
ALK	Skin Cancer, Non-Melanoma	factor(sample_subtypes)Dermatofibrosarcoma Protuberans	-0.392	1.267	-0.309	0.757	1
ALK	Skin Cancer, Non-Melanoma	factor(sample_subtypes)Extramammary Paget Disease	-16.058	816.04	-0.02	0.984	1
ALK	Skin Cancer, Non-Melanoma	factor(sample_subtypes)Merkel Cell Carcinoma	-0.713	0.838	-0.851	0.395	1
ALK	Skin Cancer, Non-Melanoma	factor(sample_subtypes)others	-16.097	1384.55	-0.012	0.991	1
ALK	Skin Cancer, Non-Melanoma	factor(sample_subtypes)Sebaceous Carcinoma	-16.235	1296.22	-0.013	0.99	1
ALK	Skin Cancer, Non-Melanoma	factor(sample_subtypes)Skin Adnexal Carcinoma	-1.688	1.399	-1.207	0.227	1
ALK	Skin Cancer, Non-Melanoma	factor(sample_all$sex)Male	0.323	0.38	0.851	0.395	1
ALK	Skin Cancer, Non-Melanoma	factor(sample_status)1	0.1	0.298	0.334	0.738	1
ALK	Bladder Cancer	factor(aya_status)1	0.524	0.724	0.723	0.47	1
ALK	Bladder Cancer	TMB	0.038	0.006	6.076	1.23e-09	5.39e-08
ALK	Bladder Cancer	factor(sample_subtypes)Bladder Squamous Cell Carcinoma	-0.075	1676.41	0	1	1
ALK	Bladder Cancer	factor(sample_subtypes)Bladder Urothelial Carcinoma	15.257	844.279	0.018	0.986	1
ALK	Bladder Cancer	factor(sample_subtypes)others	15.964	844.279	0.019	0.985	1
ALK	Bladder Cancer	factor(sample_subtypes)Plasmacytoid/Signet Ring Cell Bladder Carcinoma	16.294	844.279	0.019	0.985	1
ALK	Bladder Cancer	factor(sample_subtypes)Small Cell Bladder Cancer	15.138	844.279	0.018	0.986	1
ALK	Bladder Cancer	factor(sample_subtypes)Upper Tract Urothelial Carcinoma	14.639	844.279	0.017	0.986	1
ALK	Bladder Cancer	factor(sample_subtypes)Urethral Urothelial Carcinoma	-2.14	1263.09	-0.002	0.999	1
ALK	Bladder Cancer	factor(sample_all$sex)Male	-0.022	0.255	-0.086	0.931	1
ALK	Bladder Cancer	factor(sample_status)1	-0.338	0.29	-1.166	0.243	1
ALK	Gastrointestinal Neuroendocrine Tumor	factor(aya_status)1	-16.477	3246.05	-0.005	0.996	1
ALK	Gastrointestinal Neuroendocrine Tumor	TMB	0.141	0.05	2.821	0.00479	0.0732
ALK	Gastrointestinal Neuroendocrine Tumor	factor(sample_subtypes)High-Grade Neuroendocrine Carcinoma of the Colon and Rectum	-2.411	1.672	-1.442	0.149	0.964
ALK	Gastrointestinal Neuroendocrine Tumor	factor(sample_subtypes)others	1.848	1.211	1.526	0.127	0.882
ALK	Gastrointestinal Neuroendocrine Tumor	factor(sample_subtypes)Small Bowel Well-Differentiated Neuroendocrine Tumor	-0.733	0.85	-0.862	0.389	1
ALK	Gastrointestinal Neuroendocrine Tumor	factor(sample_subtypes)Well-Differentiated Neuroendocrine Tumor of the Appendix	-17.005	4217.99	-0.004	0.997	1
ALK	Gastrointestinal Neuroendocrine Tumor	factor(sample_subtypes)Well-Differentiated Neuroendocrine Tumor of the Rectum	-16.904	3304.42	-0.005	0.996	1
ALK	Gastrointestinal Neuroendocrine Tumor	factor(sample_all$sex)Male	-0.651	0.724	-0.898	0.369	1
ALK	Gastrointestinal Neuroendocrine Tumor	factor(sample_status)1	-0.853	0.835	-1.021	0.307	1
ALK	Mature T and NK Neoplasms	factor(aya_status)1	-17.571	3363.22	-0.005	0.996	1
ALK	Mature T and NK Neoplasms	TMB	0.037	0.021	1.748	0.0805	0.672
ALK	Mature T and NK Neoplasms	factor(sample_subtypes)Mature T and NK Neoplasms	17.978	2984.82	0.006	0.995	1
ALK	Mature T and NK Neoplasms	factor(sample_subtypes)Mycosis Fungoides	18.1	2984.82	0.006	0.995	1
ALK	Mature T and NK Neoplasms	factor(sample_subtypes)others	0.609	4813.7	0	1	1
ALK	Mature T and NK Neoplasms	factor(sample_subtypes)Peripheral T-Cell lymphoma, NOS	18.04	2984.82	0.006	0.995	1
ALK	Mature T and NK Neoplasms	factor(sample_all$sex)Male	-0.651	0.72	-0.905	0.365	1
ALK	Mature T and NK Neoplasms	factor(sample_status)1	1.613	1.255	1.286	0.198	1
APC	Glioma	factor(aya_status)1	-0.02	0.22	-0.089	0.929	1
APC	Glioma	TMB	0.034	0.003	12.625	1.55e-36	6.14e-34
APC	Glioma	factor(sample_subtypes)Anaplastic Oligoastrocytoma	0.18	0.913	0.197	0.844	1
APC	Glioma	factor(sample_subtypes)Anaplastic Oligodendroglioma	0.954	0.425	2.247	0.0246	0.289
APC	Glioma	factor(sample_subtypes)Anaplastic Pleomorphic Xanthoastrocytoma	0.879	1.076	0.817	0.414	1
APC	Glioma	factor(sample_subtypes)Astrocytoma	0.074	0.488	0.151	0.88	1
APC	Glioma	factor(sample_subtypes)Diffuse Astrocytoma	0.154	0.67	0.229	0.819	1
APC	Glioma	factor(sample_subtypes)Diffuse Glioma	0.429	0.559	0.768	0.443	1
APC	Glioma	factor(sample_subtypes)Diffuse Intrinsic Pontine Glioma	-13.737	518.985	-0.026	0.979	1
APC	Glioma	factor(sample_subtypes)Dysembryoplastic Neuroepithelial Tumor	0.916	1.079	0.849	0.396	1
APC	Glioma	factor(sample_subtypes)Encapsulated Glioma	1.288	0.804	1.603	0.109	0.81
APC	Glioma	factor(sample_subtypes)Ependymoma	-0.609	1.058	-0.576	0.565	1
APC	Glioma	factor(sample_subtypes)Ganglioglioma	0.446	0.671	0.664	0.507	1
APC	Glioma	factor(sample_subtypes)Glioblastoma	0.295	0.373	0.791	0.429	1
APC	Glioma	factor(sample_subtypes)Glioblastoma Multiforme	-0.319	0.369	-0.863	0.388	1
APC	Glioma	factor(sample_subtypes)Glioma, NOS	0.19	0.787	0.241	0.809	1
APC	Glioma	factor(sample_subtypes)Gliosarcoma	-0.616	1.105	-0.558	0.577	1
APC	Glioma	factor(sample_subtypes)High-Grade Glioma, NOS	-0.112	0.555	-0.201	0.84	1
APC	Glioma	factor(sample_subtypes)Low-Grade Glioma, NOS	0.33	0.559	0.591	0.554	1
APC	Glioma	factor(sample_subtypes)Oligoastrocytoma	0.147	1.106	0.133	0.894	1
APC	Glioma	factor(sample_subtypes)Oligodendroglioma	0.036	0.494	0.073	0.942	1
APC	Glioma	factor(sample_subtypes)others	-13.709	862.903	-0.016	0.987	1
APC	Glioma	factor(sample_subtypes)Pilocytic Astrocytoma	-1.613	1.064	-1.515	0.13	0.891
APC	Glioma	factor(sample_subtypes)Pilomyxoid Astrocytoma	-13.752	985.253	-0.014	0.989	1
APC	Glioma	factor(sample_subtypes)Pleomorphic Xanthoastrocytoma	-13.758	805.42	-0.017	0.986	1
APC	Glioma	factor(sample_all$sex)Male	0.049	0.175	0.28	0.779	1
APC	Glioma	factor(sample_status)1	0.601	0.24	2.509	0.0121	0.163
APC	Breast Cancer	factor(aya_status)1	-0.638	0.33	-1.934	0.0531	0.51
APC	Breast Cancer	TMB	0.097	0.008	12.382	3.27e-35	1.2e-32
APC	Breast Cancer	factor(sample_subtypes)Breast Invasive Cancer, NOS	13.421	614.05	0.022	0.983	1
APC	Breast Cancer	factor(sample_subtypes)Breast Invasive Carcinoma, NOS	12.522	614.05	0.02	0.984	1
APC	Breast Cancer	factor(sample_subtypes)Breast Invasive Ductal Carcinoma	13.569	614.049	0.022	0.982	1
APC	Breast Cancer	factor(sample_subtypes)Breast Invasive Lobular Carcinoma	13.452	614.049	0.022	0.983	1
APC	Breast Cancer	factor(sample_subtypes)Breast Invasive Mixed Mucinous Carcinoma	15.296	614.05	0.025	0.98	1
APC	Breast Cancer	factor(sample_subtypes)Breast Mixed Ductal and Lobular Carcinoma	13.704	614.05	0.022	0.982	1
APC	Breast Cancer	factor(sample_subtypes)Invasive Breast Carcinoma	13.68	614.049	0.022	0.982	1
APC	Breast Cancer	factor(sample_subtypes)Metaplastic Breast Cancer	0.133	846.83	0	1	1
APC	Breast Cancer	factor(sample_subtypes)others	13.982	614.05	0.023	0.982	1
APC	Breast Cancer	factor(sample_all$sex)Male	-13.762	423.592	-0.032	0.974	1
APC	Breast Cancer	factor(sample_status)1	0.38	0.163	2.332	0.0197	0.241
APC	Colorectal Cancer	factor(aya_status)1	-0.157	0.091	-1.729	0.0838	0.69
APC	Colorectal Cancer	TMB	0.001	0.001	0.413	0.68	1
APC	Colorectal Cancer	factor(sample_subtypes)Colorectal Adenocarcinoma	0.024	0.085	0.281	0.779	1
APC	Colorectal Cancer	factor(sample_subtypes)Mucinous Adenocarcinoma of the Colon and Rectum	-0.896	0.152	-5.884	3.99e-09	1.66e-07
APC	Colorectal Cancer	factor(sample_subtypes)others	-0.717	0.499	-1.437	0.151	0.968
APC	Colorectal Cancer	factor(sample_subtypes)Rectal Adenocarcinoma	0.111	0.075	1.474	0.14	0.931
APC	Colorectal Cancer	factor(sample_subtypes)Signet Ring Cell Adenocarcinoma of the Colon and Rectum	-3.467	0.605	-5.73	1.01e-08	3.99e-07
APC	Colorectal Cancer	factor(sample_all$sex)Male	0.238	0.056	4.236	2.27e-05	0.000554
APC	Colorectal Cancer	factor(sample_status)1	0.131	0.061	2.149	0.0316	0.35
APC	Soft Tissue Sarcoma	factor(aya_status)1	-0.803	0.43	-1.868	0.0617	0.567
APC	Soft Tissue Sarcoma	TMB	0.074	0.011	6.826	8.75e-12	4.65e-10
APC	Soft Tissue Sarcoma	factor(sample_subtypes)Alveolar Soft Part Sarcoma	-17.814	3305.43	-0.005	0.996	1
APC	Soft Tissue Sarcoma	factor(sample_subtypes)Angiosarcoma	-1.002	0.756	-1.326	0.185	1
APC	Soft Tissue Sarcoma	factor(sample_subtypes)Clear Cell Sarcoma	-17.809	3370.35	-0.005	0.996	1
APC	Soft Tissue Sarcoma	factor(sample_subtypes)Dedifferentiated Liposarcoma	-1.421	0.757	-1.878	0.0604	0.558
APC	Soft Tissue Sarcoma	factor(sample_subtypes)Desmoid/Aggressive Fibromatosis	0.871	0.704	1.237	0.216	1
APC	Soft Tissue Sarcoma	factor(sample_subtypes)Desmoplastic Small-Round-Cell Tumor	-1.582	1.182	-1.338	0.181	1
APC	Soft Tissue Sarcoma	factor(sample_subtypes)Embryonal Rhabdomyosarcoma	-18.125	2137.13	-0.008	0.993	1
APC	Soft Tissue Sarcoma	factor(sample_subtypes)Epithelioid Hemangioendothelioma	-17.903	2713.77	-0.007	0.995	1
APC	Soft Tissue Sarcoma	factor(sample_subtypes)Epithelioid Sarcoma	-18.146	2685.82	-0.007	0.995	1
APC	Soft Tissue Sarcoma	factor(sample_subtypes)Follicular Dendritic Cell Sarcoma	-18.342	4523.75	-0.004	0.997	1
APC	Soft Tissue Sarcoma	factor(sample_subtypes)Hemangioma	-0.742	0.798	-0.93	0.352	1
APC	Soft Tissue Sarcoma	factor(sample_subtypes)Inflammatory Myofibroblastic Tumor	-17.969	3743.84	-0.005	0.996	1
APC	Soft Tissue Sarcoma	factor(sample_subtypes)Intimal Sarcoma	-18.033	3740.04	-0.005	0.996	1
APC	Soft Tissue Sarcoma	factor(sample_subtypes)Leiomyosarcoma	-1.89	0.756	-2.5	0.0124	0.166
APC	Soft Tissue Sarcoma	factor(sample_subtypes)Liposarcoma	-0.75	1.187	-0.631	0.528	1
APC	Soft Tissue Sarcoma	factor(sample_subtypes)Myxofibrosarcoma	-18.258	2062.57	-0.009	0.993	1
APC	Soft Tissue Sarcoma	factor(sample_subtypes)Myxoid/Round-Cell Liposarcoma	-17.962	2052.71	-0.009	0.993	1
APC	Soft Tissue Sarcoma	factor(sample_subtypes)others	-2.316	1.172	-1.977	0.0481	0.476
APC	Soft Tissue Sarcoma	factor(sample_subtypes)Perivascular Epithelioid Cell Tumor	-1.273	1.182	-1.076	0.282	1
APC	Soft Tissue Sarcoma	factor(sample_subtypes)Pleomorphic Liposarcoma	-18.212	2844.77	-0.006	0.995	1
APC	Soft Tissue Sarcoma	factor(sample_subtypes)Radiation-Associated Sarcoma	-18.269	4291.1	-0.004	0.997	1
APC	Soft Tissue Sarcoma	factor(sample_subtypes)Rhabdomyosarcoma	-0.865	0.94	-0.92	0.358	1
APC	Soft Tissue Sarcoma	factor(sample_subtypes)Round Cell Sarcoma, NOS	-18.004	2769.87	-0.006	0.995	1
APC	Soft Tissue Sarcoma	factor(sample_subtypes)Sarcoma, NOS	-1.431	0.691	-2.071	0.0383	0.403
APC	Soft Tissue Sarcoma	factor(sample_subtypes)Soft Tissue Myoepithelial Carcinoma	-18.703	4041.49	-0.005	0.996	1
APC	Soft Tissue Sarcoma	factor(sample_subtypes)Solitary Fibrous Tumor/Hemangiopericytoma	-1.009	0.843	-1.198	0.231	1
APC	Soft Tissue Sarcoma	factor(sample_subtypes)Synovial Sarcoma	-1.487	0.934	-1.593	0.111	0.82
APC	Soft Tissue Sarcoma	factor(sample_subtypes)Undifferentiated Pleomorphic Sarcoma/Malignant Fibrous Histiocytoma/High-Grade Spindle Cell Sarcoma	-1.278	0.717	-1.783	0.0746	0.641
APC	Soft Tissue Sarcoma	factor(sample_subtypes)Well-Differentiated Liposarcoma	-18.097	1941.52	-0.009	0.993	1
APC	Soft Tissue Sarcoma	factor(sample_all$sex)Male	-0.011	0.272	-0.04	0.968	1
APC	Soft Tissue Sarcoma	factor(sample_status)1	0.206	0.305	0.675	0.5	1
APC	Germ Cell Tumor	factor(aya_status)1	-1.721	0.844	-2.04	0.0414	0.426
APC	Germ Cell Tumor	TMB	0.13	0.103	1.266	0.205	1
APC	Germ Cell Tumor	factor(sample_subtypes)Embryonal Carcinoma	18.234	5330.66	0.003	0.997	1
APC	Germ Cell Tumor	factor(sample_subtypes)Germ Cell Tumor with Somatic-Type Malignancy	-0.11	7981.24	0	1	1
APC	Germ Cell Tumor	factor(sample_subtypes)Immature Teratoma	17.086	8053.38	0.002	0.998	1
APC	Germ Cell Tumor	factor(sample_subtypes)Mature Teratoma	1.898	6574.86	0	1	1
APC	Germ Cell Tumor	factor(sample_subtypes)Mixed Germ Cell Tumor	17.096	5330.66	0.003	0.997	1
APC	Germ Cell Tumor	factor(sample_subtypes)Non-Seminomatous Germ Cell Tumor	17.666	5330.66	0.003	0.997	1
APC	Germ Cell Tumor	factor(sample_subtypes)others	0.555	6705.54	0	1	1
APC	Germ Cell Tumor	factor(sample_subtypes)Seminoma	16.193	5330.66	0.003	0.998	1
APC	Germ Cell Tumor	factor(sample_subtypes)Teratoma	0.105	8399.93	0	1	1
APC	Germ Cell Tumor	factor(sample_subtypes)Yolk Sac Tumor	18.327	5330.66	0.003	0.997	1
APC	Germ Cell Tumor	factor(sample_all$sex)Male	17.184	2373.75	0.007	0.994	1
APC	Germ Cell Tumor	factor(sample_status)1	0.173	0.727	0.238	0.812	1
APC	Melanoma	factor(aya_status)1	-0.192	0.295	-0.652	0.515	1
APC	Melanoma	TMB	0.032	0.003	12.366	3.98e-35	1.44e-32
APC	Melanoma	factor(sample_subtypes)Anorectal Mucosal Melanoma	0.941	0.878	1.072	0.284	1
APC	Melanoma	factor(sample_subtypes)Cutaneous Melanoma	1.571	0.722	2.174	0.0297	0.334
APC	Melanoma	factor(sample_subtypes)Desmoplastic Melanoma	1.482	0.989	1.499	0.134	0.907
APC	Melanoma	factor(sample_subtypes)Head and Neck Mucosal Melanoma	1.222	0.881	1.387	0.165	1
APC	Melanoma	factor(sample_subtypes)Melanoma	1.485	0.726	2.046	0.0408	0.421
APC	Melanoma	factor(sample_subtypes)Melanoma of Unknown Primary	1.677	0.744	2.254	0.0242	0.286
APC	Melanoma	factor(sample_subtypes)Mucosal Melanoma of the Vulva/Vagina	-13.331	479.469	-0.028	0.978	1
APC	Melanoma	factor(sample_subtypes)Ocular Melanoma	-13.427	862.085	-0.016	0.988	1
APC	Melanoma	factor(sample_subtypes)others	2.059	0.867	2.375	0.0176	0.22
APC	Melanoma	factor(sample_subtypes)Uveal Melanoma	-0.993	1.228	-0.809	0.419	1
APC	Melanoma	factor(sample_all$sex)Male	0.211	0.146	1.449	0.147	0.956
APC	Melanoma	factor(sample_status)1	0	0.148	-0.003	0.998	1
APC	Bone Cancer	factor(aya_status)1	1.571	0.609	2.581	0.00985	0.136
APC	Bone Cancer	TMB	0.347	0.069	5.02	5.16e-07	1.66e-05
APC	Bone Cancer	factor(sample_subtypes)Chordoma	1.066	1.52	0.701	0.483	1
APC	Bone Cancer	factor(sample_subtypes)Dedifferentiated Chondrosarcoma	-15.041	2607.99	-0.006	0.995	1
APC	Bone Cancer	factor(sample_subtypes)Ewing Sarcoma	-1.139	1.509	-0.755	0.45	1
APC	Bone Cancer	factor(sample_subtypes)Osteoblastic Osteosarcoma	-15.004	1806.26	-0.008	0.993	1
APC	Bone Cancer	factor(sample_subtypes)Osteosarcoma	0.554	1.188	0.466	0.641	1
APC	Bone Cancer	factor(sample_subtypes)others	1.775	1.194	1.487	0.137	0.919
APC	Bone Cancer	factor(sample_all$sex)Male	-0.653	0.609	-1.073	0.283	1
APC	Bone Cancer	factor(sample_status)1	-3.237	1.547	-2.092	0.0364	0.388
APC	Thyroid Cancer	factor(aya_status)1	-0.624	0.761	-0.82	0.412	1
APC	Thyroid Cancer	TMB	0.139	0.037	3.712	0.000205	0.00423
APC	Thyroid Cancer	factor(sample_subtypes)Follicular Thyroid Cancer	-14.686	996.274	-0.015	0.988	1
APC	Thyroid Cancer	factor(sample_subtypes)Hurthle Cell Thyroid Cancer	-0.469	1.151	-0.407	0.684	1
APC	Thyroid Cancer	factor(sample_subtypes)Medullary Thyroid Cancer	-0.798	1.154	-0.692	0.489	1
APC	Thyroid Cancer	factor(sample_subtypes)others	-14.908	1771.28	-0.008	0.993	1
APC	Thyroid Cancer	factor(sample_subtypes)Papillary Thyroid Cancer	0.076	0.625	0.121	0.904	1
APC	Thyroid Cancer	factor(sample_subtypes)Poorly Differentiated Thyroid Cancer	-0.12	0.752	-0.159	0.874	1
APC	Thyroid Cancer	factor(sample_all$sex)Male	-0.616	0.444	-1.388	0.165	1
APC	Thyroid Cancer	factor(sample_status)1	0.488	0.421	1.16	0.246	1
APC	Non-Small Cell Lung Cancer	factor(aya_status)1	0.226	0.353	0.639	0.523	1
APC	Non-Small Cell Lung Cancer	TMB	0.059	0.004	15.428	1.07e-53	1.03e-50
APC	Non-Small Cell Lung Cancer	factor(sample_subtypes)Large Cell Lung Carcinoma	0.929	1.061	0.875	0.381	1
APC	Non-Small Cell Lung Cancer	factor(sample_subtypes)Large Cell Neuroendocrine Carcinoma	0.951	0.768	1.239	0.215	1
APC	Non-Small Cell Lung Cancer	factor(sample_subtypes)Lung Adenocarcinoma	0.436	0.72	0.605	0.545	1
APC	Non-Small Cell Lung Cancer	factor(sample_subtypes)Lung Adenosquamous Carcinoma	-0.24	1.02	-0.236	0.814	1
APC	Non-Small Cell Lung Cancer	factor(sample_subtypes)Lung Carcinoid	-12.871	199.598	-0.064	0.949	1
APC	Non-Small Cell Lung Cancer	factor(sample_subtypes)Lung Neuroendocrine Tumor	0.983	0.877	1.122	0.262	1
APC	Non-Small Cell Lung Cancer	factor(sample_subtypes)Lung Squamous Cell Carcinoma	0.079	0.734	0.108	0.914	1
APC	Non-Small Cell Lung Cancer	factor(sample_subtypes)Non-Small Cell Lung Cancer	0.704	0.737	0.954	0.34	1
APC	Non-Small Cell Lung Cancer	factor(sample_subtypes)others	0.574	1.024	0.56	0.575	1
APC	Non-Small Cell Lung Cancer	factor(sample_subtypes)Pleomorphic Carcinoma of the Lung	-13.531	325.86	-0.042	0.967	1
APC	Non-Small Cell Lung Cancer	factor(sample_subtypes)Poorly Differentiated Non-Small Cell Lung Cancer	1.007	0.758	1.328	0.184	1
APC	Non-Small Cell Lung Cancer	factor(sample_subtypes)Sarcomatoid Carcinoma of the Lung	-0.704	1.247	-0.564	0.572	1
APC	Non-Small Cell Lung Cancer	factor(sample_all$sex)Male	0.137	0.086	1.588	0.112	0.825
APC	Non-Small Cell Lung Cancer	factor(sample_status)1	0.118	0.086	1.373	0.17	1
APC	Ovarian Cancer	factor(aya_status)1	0.743	0.498	1.492	0.136	0.914
APC	Ovarian Cancer	TMB	0.036	0.008	4.412	1.03e-05	0.000266
APC	Ovarian Cancer	factor(sample_subtypes)Endometrioid Ovarian Cancer	1.522	0.693	2.197	0.028	0.319
APC	Ovarian Cancer	factor(sample_subtypes)High-Grade Serous Fallopian Tube Cancer	-14.114	767.895	-0.018	0.985	1
APC	Ovarian Cancer	factor(sample_subtypes)High-Grade Serous Ovarian Cancer	0.857	0.637	1.344	0.179	1
APC	Ovarian Cancer	factor(sample_subtypes)Low-Grade Serous Ovarian Cancer	0.537	0.807	0.666	0.505	1
APC	Ovarian Cancer	factor(sample_subtypes)Mixed Ovarian Carcinoma	2.276	0.753	3.022	0.00251	0.0413
APC	Ovarian Cancer	factor(sample_subtypes)Mucinous Ovarian Cancer	-14.48	794.585	-0.018	0.985	1
APC	Ovarian Cancer	factor(sample_subtypes)others	-14.223	1112.47	-0.013	0.99	1
APC	Ovarian Cancer	factor(sample_subtypes)Ovarian Cancer, Other	1.738	0.939	1.852	0.0641	0.581
APC	Ovarian Cancer	factor(sample_subtypes)Ovarian Carcinosarcoma/Malignant Mixed Mesodermal Tumor	-0.34	1.178	-0.288	0.773	1
APC	Ovarian Cancer	factor(sample_subtypes)Ovarian Epithelial Tumor	0.216	1.182	0.183	0.855	1
APC	Ovarian Cancer	factor(sample_subtypes)Serous Borderline Ovarian Tumor	-14.409	1093.67	-0.013	0.989	1
APC	Ovarian Cancer	factor(sample_subtypes)Serous Ovarian Cancer	1.641	0.746	2.2	0.0278	0.317
APC	Ovarian Cancer	factor(sample_subtypes)Small Cell Carcinoma of the Ovary	0.959	1.224	0.784	0.433	1
APC	Ovarian Cancer	factor(sample_status)1	-0.211	0.235	-0.898	0.369	1
APC	Cancer of Unknown Primary	factor(aya_status)1	-0.311	0.388	-0.8	0.424	1
APC	Cancer of Unknown Primary	TMB	0.035	0.004	8.655	4.94e-18	4.07e-16
APC	Cancer of Unknown Primary	factor(sample_subtypes)Cancer of Unknown Primary	-0.197	0.205	-0.96	0.337	1
APC	Cancer of Unknown Primary	factor(sample_subtypes)Cancer of Unknown Primary, NOS	-0.271	0.327	-0.828	0.408	1
APC	Cancer of Unknown Primary	factor(sample_subtypes)Neuroendocrine Carcinoma, NOS	0.534	0.277	1.928	0.0538	0.516
APC	Cancer of Unknown Primary	factor(sample_subtypes)Neuroendocrine Tumor, NOS	-0.729	0.37	-1.971	0.0487	0.481
APC	Cancer of Unknown Primary	factor(sample_subtypes)others	1.069	0.826	1.294	0.196	1
APC	Cancer of Unknown Primary	factor(sample_subtypes)Poorly Differentiated Carcinoma, NOS	-0.229	0.271	-0.846	0.398	1
APC	Cancer of Unknown Primary	factor(sample_subtypes)Small Cell Carcinoma of Unknown Primary	0.091	0.492	0.184	0.854	1
APC	Cancer of Unknown Primary	factor(sample_subtypes)Squamous Cell Carcinoma, NOS	-0.708	0.338	-2.096	0.0361	0.386
APC	Cancer of Unknown Primary	factor(sample_subtypes)Undifferentiated Malignant Neoplasm	-0.679	0.494	-1.372	0.17	1
APC	Cancer of Unknown Primary	factor(sample_all$sex)Male	0.046	0.152	0.3	0.764	1
APC	Cancer of Unknown Primary	factor(sample_all$sex)Unknown	-9.097	324.744	-0.028	0.978	1
APC	Cancer of Unknown Primary	factor(sample_status)1	0.011	0.171	0.065	0.948	1
APC	Esophagogastric Cancer	factor(aya_status)1	-0.627	0.467	-1.341	0.18	1
APC	Esophagogastric Cancer	TMB	0.042	0.005	8.123	4.56e-16	3.26e-14
APC	Esophagogastric Cancer	factor(sample_subtypes)Diffuse Type Stomach Adenocarcinoma	-15.129	743.461	-0.02	0.984	1
APC	Esophagogastric Cancer	factor(sample_subtypes)Esophageal Adenocarcinoma	0.018	0.233	0.077	0.939	1
APC	Esophagogastric Cancer	factor(sample_subtypes)Esophageal Poorly Differentiated Carcinoma	0.372	0.517	0.719	0.472	1
APC	Esophagogastric Cancer	factor(sample_subtypes)Esophageal Squamous Cell Carcinoma	-0.991	0.498	-1.991	0.0465	0.464
APC	Esophagogastric Cancer	factor(sample_subtypes)Esophagogastric Adenocarcinoma	0.273	0.29	0.94	0.347	1
APC	Esophagogastric Cancer	factor(sample_subtypes)Intestinal Type Stomach Adenocarcinoma	0.368	0.595	0.619	0.536	1
APC	Esophagogastric Cancer	factor(sample_subtypes)others	-0.094	0.828	-0.114	0.91	1
APC	Esophagogastric Cancer	factor(sample_subtypes)Poorly Differentiated Carcinoma of the Stomach	-0.28	0.463	-0.605	0.545	1
APC	Esophagogastric Cancer	factor(sample_subtypes)Signet Ring Cell Carcinoma of the Stomach	-15.033	452.342	-0.033	0.973	1
APC	Esophagogastric Cancer	factor(sample_subtypes)Stomach Adenocarcinoma	-0.252	0.257	-0.981	0.326	1
APC	Esophagogastric Cancer	factor(sample_subtypes)Tubular Stomach Adenocarcinoma	-0.119	0.798	-0.149	0.882	1
APC	Esophagogastric Cancer	factor(sample_all$sex)Male	0.086	0.184	0.468	0.64	1
APC	Esophagogastric Cancer	factor(sample_status)1	0.133	0.178	0.744	0.457	1
APC	Renal Cell Carcinoma	factor(aya_status)1	-15.673	883.185	-0.018	0.986	1
APC	Renal Cell Carcinoma	TMB	0.113	0.027	4.196	2.72e-05	0.000655
APC	Renal Cell Carcinoma	factor(sample_subtypes)Collecting Duct Renal Cell Carcinoma	0.31	1.345	0.23	0.818	1
APC	Renal Cell Carcinoma	factor(sample_subtypes)FH-Deficient Renal Cell Carcinoma	-15.678	2623.62	-0.006	0.995	1
APC	Renal Cell Carcinoma	factor(sample_subtypes)others	-0.704	1.63	-0.432	0.666	1
APC	Renal Cell Carcinoma	factor(sample_subtypes)Papillary Renal Cell Carcinoma	0.771	0.825	0.934	0.35	1
APC	Renal Cell Carcinoma	factor(sample_subtypes)Renal Angiomyolipoma	0.598	1.258	0.476	0.634	1
APC	Renal Cell Carcinoma	factor(sample_subtypes)Renal Cell Carcinoma	-0.951	0.934	-1.018	0.309	1
APC	Renal Cell Carcinoma	factor(sample_subtypes)Renal Clear Cell Carcinoma	-0.371	0.771	-0.481	0.631	1
APC	Renal Cell Carcinoma	factor(sample_subtypes)Renal Medullary Carcinoma	-14.626	2442.18	-0.006	0.995	1
APC	Renal Cell Carcinoma	factor(sample_subtypes)Renal Non-Clear Cell Carcinoma	0.979	1.285	0.762	0.446	1
APC	Renal Cell Carcinoma	factor(sample_subtypes)Renal Oncocytoma	-15.817	1801.32	-0.009	0.993	1
APC	Renal Cell Carcinoma	factor(sample_subtypes)Sarcomatoid Renal Cell Carcinoma	-16.074	2268.96	-0.007	0.994	1
APC	Renal Cell Carcinoma	factor(sample_subtypes)Translocation-Associated Renal Cell Carcinoma	0.44	1.254	0.351	0.726	1
APC	Renal Cell Carcinoma	factor(sample_subtypes)Unclassified Renal Cell Carcinoma	-2.158	1.623	-1.329	0.184	1
APC	Renal Cell Carcinoma	factor(sample_all$sex)Male	-0.25	0.387	-0.646	0.518	1
APC	Renal Cell Carcinoma	factor(sample_status)1	0.108	0.365	0.297	0.767	1
APC	Hepatobiliary Cancer	factor(aya_status)1	0.227	0.583	0.389	0.697	1
APC	Hepatobiliary Cancer	TMB	0.056	0.012	4.839	1.31e-06	3.94e-05
APC	Hepatobiliary Cancer	factor(sample_subtypes)Extrahepatic Cholangiocarcinoma	-0.461	0.499	-0.925	0.355	1
APC	Hepatobiliary Cancer	factor(sample_subtypes)Fibrolamellar Carcinoma	-0.785	1.13	-0.694	0.487	1
APC	Hepatobiliary Cancer	factor(sample_subtypes)Gallbladder Adenocarcinoma, NOS	0.33	0.544	0.607	0.544	1
APC	Hepatobiliary Cancer	factor(sample_subtypes)Gallbladder Cancer	-0.347	0.46	-0.755	0.45	1
APC	Hepatobiliary Cancer	factor(sample_subtypes)Hepatoblastoma	-0.525	1.055	-0.498	0.619	1
APC	Hepatobiliary Cancer	factor(sample_subtypes)Hepatocellular Carcinoma	-0.184	0.37	-0.498	0.619	1
APC	Hepatobiliary Cancer	factor(sample_subtypes)Hepatocellular Carcinoma plus Intrahepatic Cholangiocarcinoma	-0.296	0.777	-0.382	0.703	1
APC	Hepatobiliary Cancer	factor(sample_subtypes)Intrahepatic Cholangiocarcinoma	-1.33	0.447	-2.976	0.00292	0.0472
APC	Hepatobiliary Cancer	factor(sample_subtypes)others	-14.996	964.831	-0.016	0.988	1
APC	Hepatobiliary Cancer	factor(sample_subtypes)Perihilar Cholangiocarcinoma	-14.701	880.265	-0.017	0.987	1
APC	Hepatobiliary Cancer	factor(sample_all$sex)Male	0.153	0.279	0.55	0.583	1
APC	Hepatobiliary Cancer	factor(sample_status)1	-0.188	0.301	-0.626	0.531	1
APC	Cervical Cancer	factor(aya_status)1	-0.007	0.608	-0.012	0.991	1
APC	Cervical Cancer	TMB	0.098	0.038	2.561	0.0104	0.143
APC	Cervical Cancer	factor(sample_subtypes)Cervical Adenosquamous Carcinoma	-0.212	2839.48	0	1	1
APC	Cervical Cancer	factor(sample_subtypes)Cervical Squamous Cell Carcinoma	16.016	2138.19	0.007	0.994	1
APC	Cervical Cancer	factor(sample_subtypes)Endocervical Adenocarcinoma	17.066	2138.19	0.008	0.994	1
APC	Cervical Cancer	factor(sample_subtypes)Gastric Type Mucinous Carcinoma	0.365	2849.02	0	1	1
APC	Cervical Cancer	factor(sample_subtypes)others	16.712	2138.19	0.008	0.994	1
APC	Cervical Cancer	factor(sample_all$sex)Male	-16.215	7595.66	-0.002	0.998	1
APC	Cervical Cancer	factor(sample_status)1	-0.796	0.679	-1.172	0.241	1
APC	Pancreatic Cancer	factor(aya_status)1	0.517	0.62	0.834	0.404	1
APC	Pancreatic Cancer	TMB	0.051	0.008	6.299	2.99e-10	1.39e-08
APC	Pancreatic Cancer	factor(sample_subtypes)Adenosquamous Carcinoma of the Pancreas	-0.191	0.855	-0.224	0.823	1
APC	Pancreatic Cancer	factor(sample_subtypes)Intraductal Papillary Mucinous Neoplasm	-15.006	840.686	-0.018	0.986	1
APC	Pancreatic Cancer	factor(sample_subtypes)others	-0.091	1.215	-0.075	0.94	1
APC	Pancreatic Cancer	factor(sample_subtypes)Pancreatic Adenocarcinoma	-1.206	0.622	-1.938	0.0527	0.507
APC	Pancreatic Cancer	factor(sample_subtypes)Pancreatic Neuroendocrine Tumor	-1.305	0.71	-1.839	0.0659	0.592
APC	Pancreatic Cancer	factor(sample_subtypes)Solid Pseudopapillary Neoplasm of the Pancreas	-15.041	899.147	-0.017	0.987	1
APC	Pancreatic Cancer	factor(sample_subtypes)Undifferentiated Carcinoma of the Pancreas	-14.9	693.721	-0.021	0.983	1
APC	Pancreatic Cancer	factor(sample_all$sex)Male	-0.418	0.24	-1.742	0.0816	0.678
APC	Pancreatic Cancer	factor(sample_status)1	-0.554	0.265	-2.092	0.0364	0.388
APC	Nerve Sheath Tumor	factor(aya_status)1	-0.946	1.121	-0.844	0.399	1
APC	Nerve Sheath Tumor	TMB	0.312	0.117	2.675	0.00748	0.108
APC	Nerve Sheath Tumor	factor(sample_subtypes)Neurofibroma	-15.662	1798.55	-0.009	0.993	1
APC	Nerve Sheath Tumor	factor(sample_subtypes)others	-4.56	13.004	-0.351	0.726	1
APC	Nerve Sheath Tumor	factor(sample_subtypes)Schwannoma	1.578	0.91	1.735	0.0828	0.685
APC	Nerve Sheath Tumor	factor(sample_all$sex)Male	0.483	0.752	0.642	0.521	1
APC	Nerve Sheath Tumor	factor(sample_status)1	0.125	1.276	0.098	0.922	1
APC	Mature B-Cell Neoplasms	factor(aya_status)1	-0.872	1.134	-0.769	0.442	1
APC	Mature B-Cell Neoplasms	TMB	0.068	0.023	3.002	0.00268	0.0438
APC	Mature B-Cell Neoplasms	factor(sample_subtypes)Diffuse Large B-Cell Lymphoma, NOS	-1.199	0.626	-1.917	0.0553	0.525
APC	Mature B-Cell Neoplasms	factor(sample_subtypes)Follicular Lymphoma	-1.222	0.79	-1.546	0.122	0.863
APC	Mature B-Cell Neoplasms	factor(sample_subtypes)Mantle Cell Lymphoma	-0.358	1.069	-0.335	0.737	1
APC	Mature B-Cell Neoplasms	factor(sample_subtypes)Marginal Zone Lymphoma	-14.485	923.076	-0.016	0.987	1
APC	Mature B-Cell Neoplasms	factor(sample_subtypes)Mature B-Cell Neoplasms	-1.381	1.068	-1.293	0.196	1
APC	Mature B-Cell Neoplasms	factor(sample_subtypes)others	-0.218	0.799	-0.272	0.785	1
APC	Mature B-Cell Neoplasms	factor(sample_subtypes)Plasma Cell Myeloma	-1.062	0.783	-1.356	0.175	1
APC	Mature B-Cell Neoplasms	factor(sample_all$sex)Male	-0.484	0.426	-1.136	0.256	1
APC	Mature B-Cell Neoplasms	factor(sample_status)1	0.175	0.836	0.21	0.834	1
APC	Head and Neck Cancer	factor(aya_status)1	0.298	0.758	0.393	0.694	1
APC	Head and Neck Cancer	TMB	0.065	0.01	6.459	1.05e-10	5.11e-09
APC	Head and Neck Cancer	factor(sample_subtypes)Head and Neck Neuroendocrine Carcinoma	-15.817	1573.04	-0.01	0.992	1
APC	Head and Neck Cancer	factor(sample_subtypes)Head and Neck Squamous Cell Carcinoma	-0.703	1.082	-0.65	0.516	1
APC	Head and Neck Cancer	factor(sample_subtypes)Head and Neck Squamous Cell Carcinoma of Unknown Primary	-2.411	1.759	-1.37	0.171	1
APC	Head and Neck Cancer	factor(sample_subtypes)Hypopharynx Squamous Cell Carcinoma	0.148	1.457	0.102	0.919	1
APC	Head and Neck Cancer	factor(sample_subtypes)Larynx Squamous Cell Carcinoma	-0.788	1.255	-0.628	0.53	1
APC	Head and Neck Cancer	factor(sample_subtypes)Nasopharyngeal Carcinoma	-1.233	1.485	-0.83	0.406	1
APC	Head and Neck Cancer	factor(sample_subtypes)Oral Cavity Squamous Cell Carcinoma	-0.278	1.066	-0.261	0.794	1
APC	Head and Neck Cancer	factor(sample_subtypes)Oropharynx Squamous Cell Carcinoma	-0.306	1.075	-0.285	0.776	1
APC	Head and Neck Cancer	factor(sample_subtypes)others	-15.43	957.159	-0.016	0.987	1
APC	Head and Neck Cancer	factor(sample_subtypes)Sinonasal Squamous Cell Carcinoma	-16.212	1095.03	-0.015	0.988	1
APC	Head and Neck Cancer	factor(sample_all$sex)Male	0.39	0.406	0.962	0.336	1
APC	Head and Neck Cancer	factor(sample_status)1	0.04	0.341	0.117	0.907	1
APC	Endometrial Cancer	factor(aya_status)1	0.179	0.578	0.31	0.757	1
APC	Endometrial Cancer	TMB	0.037	0.003	12.5	7.42e-36	2.84e-33
APC	Endometrial Cancer	factor(sample_subtypes)others	-0.844	1.067	-0.791	0.429	1
APC	Endometrial Cancer	factor(sample_subtypes)Uterine Carcinosarcoma/Uterine Malignant Mixed Mullerian Tumor	-0.52	0.401	-1.297	0.195	1
APC	Endometrial Cancer	factor(sample_subtypes)Uterine Clear Cell Carcinoma	-2.41	1.129	-2.135	0.0327	0.359
APC	Endometrial Cancer	factor(sample_subtypes)Uterine Dedifferentiated Carcinoma	-1.063	1.065	-0.998	0.318	1
APC	Endometrial Cancer	factor(sample_subtypes)Uterine Endometrioid Carcinoma	-0.117	0.256	-0.457	0.648	1
APC	Endometrial Cancer	factor(sample_subtypes)Uterine Mixed Endometrial Carcinoma	-1.961	0.981	-1.999	0.0456	0.458
APC	Endometrial Cancer	factor(sample_subtypes)Uterine Serous Carcinoma/Uterine Papillary Serous Carcinoma	-0.847	0.387	-2.187	0.0287	0.326
APC	Endometrial Cancer	factor(sample_subtypes)Uterine Undifferentiated Carcinoma	0.614	0.804	0.763	0.445	1
APC	Endometrial Cancer	factor(sample_status)1	-0.251	0.227	-1.102	0.271	1
APC	Gastrointestinal Stromal Tumor	factor(aya_status)1	-15.566	2185.34	-0.007	0.994	1
APC	Gastrointestinal Stromal Tumor	TMB	0.256	0.113	2.263	0.0236	0.28
APC	Gastrointestinal Stromal Tumor	factor(sample_all$sex)Male	0.273	0.879	0.31	0.756	1
APC	Gastrointestinal Stromal Tumor	factor(sample_status)1	-0.117	0.88	-0.132	0.895	1
APC	Salivary Gland Cancer	factor(aya_status)1	0.964	1.247	0.773	0.44	1
APC	Salivary Gland Cancer	TMB	0.057	0.042	1.351	0.177	1
APC	Salivary Gland Cancer	factor(sample_subtypes)Adenoid Cystic Carcinoma	14.928	3155.59	0.005	0.996	1
APC	Salivary Gland Cancer	factor(sample_subtypes)Mammary Analogue Secretory Carcinoma of Salivary Gland Origin	18.342	3155.59	0.006	0.995	1
APC	Salivary Gland Cancer	factor(sample_subtypes)Mucoepidermoid Carcinoma	-0.337	4395.21	0	1	1
APC	Salivary Gland Cancer	factor(sample_subtypes)Myoepithelial Carcinoma	17.496	3155.59	0.006	0.996	1
APC	Salivary Gland Cancer	factor(sample_subtypes)others	0.271	18009	0	1	1
APC	Salivary Gland Cancer	factor(sample_subtypes)Salivary Adenocarcinoma	-0.114	4830.71	0	1	1
APC	Salivary Gland Cancer	factor(sample_subtypes)Salivary Carcinoma	-0.646	4533.94	0	1	1
APC	Salivary Gland Cancer	factor(sample_subtypes)Salivary Carcinoma, Other	16.723	3155.59	0.005	0.996	1
APC	Salivary Gland Cancer	factor(sample_subtypes)Salivary Duct Carcinoma	16.668	3155.59	0.005	0.996	1
APC	Salivary Gland Cancer	factor(sample_all$sex)Male	0.615	0.898	0.685	0.494	1
APC	Salivary Gland Cancer	factor(sample_status)1	-0.403	0.772	-0.522	0.602	1
APC	Appendiceal Cancer	factor(aya_status)1	-0.684	0.792	-0.864	0.388	1
APC	Appendiceal Cancer	TMB	0.233	0.057	4.108	3.99e-05	0.000935
APC	Appendiceal Cancer	factor(sample_subtypes)Goblet Cell Carcinoid of the Appendix	-0.1	0.677	-0.147	0.883	1
APC	Appendiceal Cancer	factor(sample_subtypes)Mucinous Adenocarcinoma of the Appendix	-0.435	0.43	-1.013	0.311	1
APC	Appendiceal Cancer	factor(sample_subtypes)others	-15.968	2430.12	-0.007	0.995	1
APC	Appendiceal Cancer	factor(sample_subtypes)Signet Ring Cell Type of the Appendix	-16.478	1390.31	-0.012	0.991	1
APC	Appendiceal Cancer	factor(sample_all$sex)Male	0.205	0.401	0.512	0.608	1
APC	Appendiceal Cancer	factor(sample_status)1	-0.437	0.415	-1.055	0.292	1
APC	Leukemia	factor(aya_status)1	-16.665	2648	-0.006	0.995	1
APC	Leukemia	TMB	0.174	0.116	1.498	0.134	0.908
APC	Leukemia	factor(sample_subtypes)others	-16.954	3208.05	-0.005	0.996	1
APC	Leukemia	factor(sample_all$sex)Male	-0.01	0.8	-0.013	0.99	1
APC	Leukemia	factor(sample_status)1	2.452	1.216	2.017	0.0437	0.444
APC	Mesothelioma	factor(aya_status)1	-16.448	2530.26	-0.007	0.995	1
APC	Mesothelioma	TMB	0.092	0.041	2.265	0.0235	0.278
APC	Mesothelioma	factor(sample_subtypes)Peritoneal Mesothelioma	-0.347	6595.71	0	1	1
APC	Mesothelioma	factor(sample_subtypes)Pleural Mesothelioma	16.859	6362.37	0.003	0.998	1
APC	Mesothelioma	factor(sample_subtypes)Pleural Mesothelioma, Biphasic Type	-0.038	6643.94	0	1	1
APC	Mesothelioma	factor(sample_subtypes)Pleural Mesothelioma, Epithelioid Type	16.314	6362.37	0.003	0.998	1
APC	Mesothelioma	factor(sample_subtypes)Pleural Mesothelioma, Sarcomatoid Type	17.668	6362.37	0.003	0.998	1
APC	Mesothelioma	factor(sample_all$sex)Male	-0.691	0.643	-1.075	0.282	1
APC	Mesothelioma	factor(sample_status)1	1.352	0.65	2.079	0.0376	0.398
APC	Skin Cancer, Non-Melanoma	factor(aya_status)1	1.071	0.783	1.368	0.171	1
APC	Skin Cancer, Non-Melanoma	TMB	0.026	0.005	5.778	7.58e-09	3.04e-07
APC	Skin Cancer, Non-Melanoma	factor(sample_subtypes)Basal Cell Carcinoma	0.836	1.182	0.708	0.479	1
APC	Skin Cancer, Non-Melanoma	factor(sample_subtypes)Cutaneous Squamous Cell Carcinoma	0.965	1.158	0.833	0.405	1
APC	Skin Cancer, Non-Melanoma	factor(sample_subtypes)Dermatofibrosarcoma Protuberans	0.3	1.459	0.206	0.837	1
APC	Skin Cancer, Non-Melanoma	factor(sample_subtypes)Extramammary Paget Disease	-14.694	810.607	-0.018	0.986	1
APC	Skin Cancer, Non-Melanoma	factor(sample_subtypes)Merkel Cell Carcinoma	0.85	1.146	0.741	0.458	1
APC	Skin Cancer, Non-Melanoma	factor(sample_subtypes)others	-15.09	1368.51	-0.011	0.991	1
APC	Skin Cancer, Non-Melanoma	factor(sample_subtypes)Sebaceous Carcinoma	1.978	1.261	1.569	0.117	0.842
APC	Skin Cancer, Non-Melanoma	factor(sample_subtypes)Skin Adnexal Carcinoma	-15.251	1278.28	-0.012	0.99	1
APC	Skin Cancer, Non-Melanoma	factor(sample_all$sex)Male	0.863	0.362	2.384	0.0171	0.215
APC	Skin Cancer, Non-Melanoma	factor(sample_status)1	0.234	0.266	0.877	0.38	1
APC	Bladder Cancer	factor(aya_status)1	-1.836	1.334	-1.376	0.169	1
APC	Bladder Cancer	TMB	0.044	0.006	7.796	6.37e-15	4.23e-13
APC	Bladder Cancer	factor(sample_subtypes)Bladder Squamous Cell Carcinoma	-14.906	874.79	-0.017	0.986	1
APC	Bladder Cancer	factor(sample_subtypes)Bladder Urothelial Carcinoma	-0.192	0.535	-0.36	0.719	1
APC	Bladder Cancer	factor(sample_subtypes)others	-1.024	1.141	-0.898	0.369	1
APC	Bladder Cancer	factor(sample_subtypes)Plasmacytoid/Signet Ring Cell Bladder Carcinoma	-15.248	944.684	-0.016	0.987	1
APC	Bladder Cancer	factor(sample_subtypes)Small Cell Bladder Cancer	-15.096	728.584	-0.021	0.983	1
APC	Bladder Cancer	factor(sample_subtypes)Upper Tract Urothelial Carcinoma	-1.479	0.655	-2.259	0.0239	0.283
APC	Bladder Cancer	factor(sample_subtypes)Urethral Urothelial Carcinoma	-0.986	1.119	-0.881	0.378	1
APC	Bladder Cancer	factor(sample_all$sex)Male	0.275	0.228	1.207	0.228	1
APC	Bladder Cancer	factor(sample_status)1	0.15	0.209	0.721	0.471	1
APC	Gastrointestinal Neuroendocrine Tumor	factor(aya_status)1	-1.103	1.156	-0.953	0.34	1
APC	Gastrointestinal Neuroendocrine Tumor	TMB	0.039	0.035	1.112	0.266	1
APC	Gastrointestinal Neuroendocrine Tumor	factor(sample_subtypes)High-Grade Neuroendocrine Carcinoma of the Colon and Rectum	2.794	0.472	5.919	3.24e-09	1.36e-07
APC	Gastrointestinal Neuroendocrine Tumor	factor(sample_subtypes)others	-14.482	1481.66	-0.01	0.992	1
APC	Gastrointestinal Neuroendocrine Tumor	factor(sample_subtypes)Small Bowel Well-Differentiated Neuroendocrine Tumor	-1.175	0.811	-1.449	0.147	0.956
APC	Gastrointestinal Neuroendocrine Tumor	factor(sample_subtypes)Well-Differentiated Neuroendocrine Tumor of the Appendix	-14.168	971.869	-0.015	0.988	1
APC	Gastrointestinal Neuroendocrine Tumor	factor(sample_subtypes)Well-Differentiated Neuroendocrine Tumor of the Rectum	-0.059	1.093	-0.054	0.957	1
APC	Gastrointestinal Neuroendocrine Tumor	factor(sample_all$sex)Male	0.531	0.384	1.382	0.167	1
APC	Gastrointestinal Neuroendocrine Tumor	factor(sample_status)1	-0.125	0.402	-0.311	0.756	1
APC	Uterine Sarcoma	factor(aya_status)1	1.518	1.261	1.204	0.228	1
APC	Uterine Sarcoma	TMB	0.389	0.108	3.616	0.0003	0.00599
APC	Uterine Sarcoma	factor(sample_subtypes)Low-Grade Endometrial Stromal Sarcoma	-14.343	3110.19	-0.005	0.996	1
APC	Uterine Sarcoma	factor(sample_subtypes)others	1.015	3.495	0.29	0.771	1
APC	Uterine Sarcoma	factor(sample_subtypes)Uterine Adenosarcoma	-0.214	3.535	-0.06	0.952	1
APC	Uterine Sarcoma	factor(sample_subtypes)Uterine Leiomyosarcoma	0.155	3.402	0.046	0.964	1
APC	Uterine Sarcoma	factor(sample_subtypes)Uterine Perivascular Epithelioid Cell Tumor	-15.311	3700.65	-0.004	0.997	1
APC	Uterine Sarcoma	factor(sample_subtypes)Uterine Sarcoma, Other	-15.884	2635.85	-0.006	0.995	1
APC	Uterine Sarcoma	factor(sample_status)1	-14.704	36.151	-0.407	0.684	1
APC	Adrenocortical Carcinoma	factor(aya_status)1	-18.558	5090.75	-0.004	0.997	1
APC	Adrenocortical Carcinoma	TMB	0.196	0.062	3.18	0.00147	0.0256
APC	Adrenocortical Carcinoma	factor(sample_all$sex)Male	-21.361	3326.29	-0.006	0.995	1
APC	Adrenocortical Carcinoma	factor(sample_status)1	-0.537	0.937	-0.572	0.567	1
AR	Glioma	factor(aya_status)1	0.136	0.27	0.505	0.613	1
AR	Glioma	TMB	0.017	0.002	9.525	1.65e-21	1.76e-19
AR	Glioma	factor(sample_subtypes)Anaplastic Oligoastrocytoma	0.28	1.14	0.246	0.806	1
AR	Glioma	factor(sample_subtypes)Anaplastic Oligodendroglioma	0.711	0.61	1.165	0.244	1
AR	Glioma	factor(sample_subtypes)Anaplastic Pleomorphic Xanthoastrocytoma	-15.205	2316.36	-0.007	0.995	1
AR	Glioma	factor(sample_subtypes)Astrocytoma	0.514	0.615	0.836	0.403	1
AR	Glioma	factor(sample_subtypes)Diffuse Astrocytoma	0.754	0.744	1.014	0.311	1
AR	Glioma	factor(sample_subtypes)Diffuse Glioma	0.837	0.683	1.227	0.22	1
AR	Glioma	factor(sample_subtypes)Diffuse Intrinsic Pontine Glioma	-15.185	1395.94	-0.011	0.991	1
AR	Glioma	factor(sample_subtypes)Dysembryoplastic Neuroepithelial Tumor	-14.824	2437.13	-0.006	0.995	1
AR	Glioma	factor(sample_subtypes)Encapsulated Glioma	1.186	1.121	1.058	0.29	1
AR	Glioma	factor(sample_subtypes)Ependymoma	-14.992	1146.97	-0.013	0.99	1
AR	Glioma	factor(sample_subtypes)Ganglioglioma	-15.016	1092.69	-0.014	0.989	1
AR	Glioma	factor(sample_subtypes)Glioblastoma	0.09	0.534	0.169	0.866	1
AR	Glioma	factor(sample_subtypes)Glioblastoma Multiforme	0.314	0.497	0.631	0.528	1
AR	Glioma	factor(sample_subtypes)Glioma, NOS	0.091	1.106	0.082	0.934	1
AR	Glioma	factor(sample_subtypes)Gliosarcoma	0.279	1.118	0.25	0.803	1
AR	Glioma	factor(sample_subtypes)High-Grade Glioma, NOS	0.175	0.695	0.251	0.802	1
AR	Glioma	factor(sample_subtypes)Low-Grade Glioma, NOS	0.477	0.742	0.643	0.52	1
AR	Glioma	factor(sample_subtypes)Oligoastrocytoma	-15.382	2153.18	-0.007	0.994	1
AR	Glioma	factor(sample_subtypes)Oligodendroglioma	0.306	0.645	0.475	0.635	1
AR	Glioma	factor(sample_subtypes)others	-15.019	2314.89	-0.006	0.995	1
AR	Glioma	factor(sample_subtypes)Pilocytic Astrocytoma	-0.221	0.848	-0.26	0.795	1
AR	Glioma	factor(sample_subtypes)Pilomyxoid Astrocytoma	-15.369	2653.03	-0.006	0.995	1
AR	Glioma	factor(sample_subtypes)Pleomorphic Xanthoastrocytoma	1.182	1.125	1.051	0.293	1
AR	Glioma	factor(sample_all$sex)Male	-0.979	0.227	-4.302	1.69e-05	0.000422
AR	Glioma	factor(sample_status)1	0.579	0.308	1.882	0.0598	0.554
AR	Breast Cancer	factor(aya_status)1	-0.208	0.336	-0.619	0.536	1
AR	Breast Cancer	TMB	0.063	0.009	6.851	7.33e-12	3.92e-10
AR	Breast Cancer	factor(sample_subtypes)Breast Invasive Cancer, NOS	13.215	617.212	0.021	0.983	1
AR	Breast Cancer	factor(sample_subtypes)Breast Invasive Carcinoma, NOS	12.843	617.212	0.021	0.983	1
AR	Breast Cancer	factor(sample_subtypes)Breast Invasive Ductal Carcinoma	13.115	617.211	0.021	0.983	1
AR	Breast Cancer	factor(sample_subtypes)Breast Invasive Lobular Carcinoma	13.491	617.212	0.022	0.983	1
AR	Breast Cancer	factor(sample_subtypes)Breast Invasive Mixed Mucinous Carcinoma	14.438	617.212	0.023	0.981	1
AR	Breast Cancer	factor(sample_subtypes)Breast Mixed Ductal and Lobular Carcinoma	12.995	617.212	0.021	0.983	1
AR	Breast Cancer	factor(sample_subtypes)Invasive Breast Carcinoma	13.522	617.211	0.022	0.983	1
AR	Breast Cancer	factor(sample_subtypes)Metaplastic Breast Cancer	14.536	617.212	0.024	0.981	1
AR	Breast Cancer	factor(sample_subtypes)others	13.297	617.212	0.022	0.983	1
AR	Breast Cancer	factor(sample_all$sex)Male	-13.263	439.099	-0.03	0.976	1
AR	Breast Cancer	factor(sample_status)1	-0.132	0.199	-0.664	0.507	1
AR	Colorectal Cancer	factor(aya_status)1	-0.266	0.232	-1.145	0.252	1
AR	Colorectal Cancer	TMB	0.024	0.002	13.157	1.55e-39	7.44e-37
AR	Colorectal Cancer	factor(sample_subtypes)Colorectal Adenocarcinoma	-0.234	0.22	-1.066	0.287	1
AR	Colorectal Cancer	factor(sample_subtypes)Mucinous Adenocarcinoma of the Colon and Rectum	0.344	0.316	1.089	0.276	1
AR	Colorectal Cancer	factor(sample_subtypes)others	0.353	0.666	0.53	0.596	1
AR	Colorectal Cancer	factor(sample_subtypes)Rectal Adenocarcinoma	-0.018	0.18	-0.098	0.922	1
AR	Colorectal Cancer	factor(sample_subtypes)Signet Ring Cell Adenocarcinoma of the Colon and Rectum	-0.008	0.899	-0.008	0.993	1
AR	Colorectal Cancer	factor(sample_all$sex)Male	-0.393	0.131	-3.003	0.00268	0.0437
AR	Colorectal Cancer	factor(sample_status)1	-0.265	0.152	-1.746	0.0809	0.675
AR	Soft Tissue Sarcoma	factor(aya_status)1	0	0.521	0	1	1
AR	Soft Tissue Sarcoma	TMB	0.053	0.012	4.317	1.58e-05	0.000398
AR	Soft Tissue Sarcoma	factor(sample_subtypes)Alveolar Soft Part Sarcoma	-0.045	4239.52	0	1	1
AR	Soft Tissue Sarcoma	factor(sample_subtypes)Angiosarcoma	16.179	2628.17	0.006	0.995	1
AR	Soft Tissue Sarcoma	factor(sample_subtypes)Clear Cell Sarcoma	-0.039	4290.66	0	1	1
AR	Soft Tissue Sarcoma	factor(sample_subtypes)Dedifferentiated Liposarcoma	15.847	2628.17	0.006	0.995	1
AR	Soft Tissue Sarcoma	factor(sample_subtypes)Desmoid/Aggressive Fibromatosis	16.265	2628.17	0.006	0.995	1
AR	Soft Tissue Sarcoma	factor(sample_subtypes)Desmoplastic Small-Round-Cell Tumor	0.266	3266.71	0	1	1
AR	Soft Tissue Sarcoma	factor(sample_subtypes)Embryonal Rhabdomyosarcoma	-0.005	3388.22	0	1	1
AR	Soft Tissue Sarcoma	factor(sample_subtypes)Epithelioid Hemangioendothelioma	-0.011	3782.41	0	1	1
AR	Soft Tissue Sarcoma	factor(sample_subtypes)Epithelioid Sarcoma	-0.099	3818.74	0	1	1
AR	Soft Tissue Sarcoma	factor(sample_subtypes)Follicular Dendritic Cell Sarcoma	0.028	5219.43	0	1	1
AR	Soft Tissue Sarcoma	factor(sample_subtypes)Hemangioma	15.779	2628.17	0.006	0.995	1
AR	Soft Tissue Sarcoma	factor(sample_subtypes)Inflammatory Myofibroblastic Tumor	-0.075	4583.79	0	1	1
AR	Soft Tissue Sarcoma	factor(sample_subtypes)Intimal Sarcoma	-0.067	4590.67	0	1	1
AR	Soft Tissue Sarcoma	factor(sample_subtypes)Leiomyosarcoma	16.505	2628.17	0.006	0.995	1
AR	Soft Tissue Sarcoma	factor(sample_subtypes)Liposarcoma	-0.164	4402.49	0	1	1
AR	Soft Tissue Sarcoma	factor(sample_subtypes)Myxofibrosarcoma	-0.063	3339.17	0	1	1
AR	Soft Tissue Sarcoma	factor(sample_subtypes)Myxoid/Round-Cell Liposarcoma	16.317	2628.17	0.006	0.995	1
AR	Soft Tissue Sarcoma	factor(sample_subtypes)others	16.429	2628.17	0.006	0.995	1
AR	Soft Tissue Sarcoma	factor(sample_subtypes)Perivascular Epithelioid Cell Tumor	16.702	2628.17	0.006	0.995	1
AR	Soft Tissue Sarcoma	factor(sample_subtypes)Pleomorphic Liposarcoma	16.827	2628.17	0.006	0.995	1
AR	Soft Tissue Sarcoma	factor(sample_subtypes)Radiation-Associated Sarcoma	18.262	2628.17	0.007	0.994	1
AR	Soft Tissue Sarcoma	factor(sample_subtypes)Rhabdomyosarcoma	16.456	2628.17	0.006	0.995	1
AR	Soft Tissue Sarcoma	factor(sample_subtypes)Round Cell Sarcoma, NOS	16.83	2628.17	0.006	0.995	1
AR	Soft Tissue Sarcoma	factor(sample_subtypes)Sarcoma, NOS	15.567	2628.17	0.006	0.995	1
AR	Soft Tissue Sarcoma	factor(sample_subtypes)Soft Tissue Myoepithelial Carcinoma	-0.506	5004.25	0	1	1
AR	Soft Tissue Sarcoma	factor(sample_subtypes)Solitary Fibrous Tumor/Hemangiopericytoma	15.987	2628.17	0.006	0.995	1
AR	Soft Tissue Sarcoma	factor(sample_subtypes)Synovial Sarcoma	15.641	2628.17	0.006	0.995	1
AR	Soft Tissue Sarcoma	factor(sample_subtypes)Undifferentiated Pleomorphic Sarcoma/Malignant Fibrous Histiocytoma/High-Grade Spindle Cell Sarcoma	15.868	2628.17	0.006	0.995	1
AR	Soft Tissue Sarcoma	factor(sample_subtypes)Well-Differentiated Liposarcoma	16.207	2628.17	0.006	0.995	1
AR	Soft Tissue Sarcoma	factor(sample_all$sex)Male	-0.617	0.392	-1.577	0.115	0.836
AR	Soft Tissue Sarcoma	factor(sample_status)1	0.164	0.398	0.411	0.681	1
AR	Melanoma	factor(aya_status)1	-0.08	0.412	-0.195	0.846	1
AR	Melanoma	TMB	0.031	0.003	11.03	2.75e-28	5.17e-26
AR	Melanoma	factor(sample_subtypes)Anorectal Mucosal Melanoma	-13.82	643.73	-0.021	0.983	1
AR	Melanoma	factor(sample_subtypes)Cutaneous Melanoma	1.465	1.018	1.44	0.15	0.966
AR	Melanoma	factor(sample_subtypes)Desmoplastic Melanoma	1.307	1.352	0.967	0.333	1
AR	Melanoma	factor(sample_subtypes)Head and Neck Mucosal Melanoma	0.383	1.425	0.269	0.788	1
AR	Melanoma	factor(sample_subtypes)Melanoma	1.222	1.024	1.194	0.233	1
AR	Melanoma	factor(sample_subtypes)Melanoma of Unknown Primary	0.967	1.071	0.903	0.367	1
AR	Melanoma	factor(sample_subtypes)Mucosal Melanoma of the Vulva/Vagina	0.988	1.238	0.798	0.425	1
AR	Melanoma	factor(sample_subtypes)Ocular Melanoma	-13.747	1410.48	-0.01	0.992	1
AR	Melanoma	factor(sample_subtypes)others	0.968	1.432	0.676	0.499	1
AR	Melanoma	factor(sample_subtypes)Uveal Melanoma	-2.788	2.746	-1.015	0.31	1
AR	Melanoma	factor(sample_all$sex)Male	-0.703	0.207	-3.392	0.000694	0.0129
AR	Melanoma	factor(sample_status)1	0.003	0.211	0.014	0.989	1
AR	Thyroid Cancer	factor(aya_status)1	0.859	0.675	1.272	0.203	1
AR	Thyroid Cancer	TMB	0.078	0.034	2.285	0.0223	0.267
AR	Thyroid Cancer	factor(sample_subtypes)Follicular Thyroid Cancer	-15.665	2624.22	-0.006	0.995	1
AR	Thyroid Cancer	factor(sample_subtypes)Hurthle Cell Thyroid Cancer	-15.163	2109.26	-0.007	0.994	1
AR	Thyroid Cancer	factor(sample_subtypes)Medullary Thyroid Cancer	1.108	1.273	0.87	0.384	1
AR	Thyroid Cancer	factor(sample_subtypes)others	-15.016	4740	-0.003	0.997	1
AR	Thyroid Cancer	factor(sample_subtypes)Papillary Thyroid Cancer	0.129	1.119	0.115	0.908	1
AR	Thyroid Cancer	factor(sample_subtypes)Poorly Differentiated Thyroid Cancer	-0.414	1.606	-0.258	0.797	1
AR	Thyroid Cancer	factor(sample_all$sex)Male	-1.136	0.807	-1.407	0.159	0.997
AR	Thyroid Cancer	factor(sample_status)1	-1.108	0.857	-1.292	0.196	1
AR	Non-Small Cell Lung Cancer	factor(aya_status)1	-0.27	0.594	-0.454	0.65	1
AR	Non-Small Cell Lung Cancer	TMB	0.072	0.004	16.389	2.31e-60	3.03e-57
AR	Non-Small Cell Lung Cancer	factor(sample_subtypes)Large Cell Lung Carcinoma	-0.576	1.225	-0.47	0.638	1
AR	Non-Small Cell Lung Cancer	factor(sample_subtypes)Large Cell Neuroendocrine Carcinoma	-1.1	0.79	-1.393	0.164	1
AR	Non-Small Cell Lung Cancer	factor(sample_subtypes)Lung Adenocarcinoma	-0.718	0.597	-1.203	0.229	1
AR	Non-Small Cell Lung Cancer	factor(sample_subtypes)Lung Adenosquamous Carcinoma	-0.715	0.936	-0.763	0.445	1
AR	Non-Small Cell Lung Cancer	factor(sample_subtypes)Lung Carcinoid	-1.122	0.928	-1.209	0.227	1
AR	Non-Small Cell Lung Cancer	factor(sample_subtypes)Lung Neuroendocrine Tumor	-0.887	1.01	-0.878	0.38	1
AR	Non-Small Cell Lung Cancer	factor(sample_subtypes)Lung Squamous Cell Carcinoma	-0.612	0.62	-0.987	0.324	1
AR	Non-Small Cell Lung Cancer	factor(sample_subtypes)Non-Small Cell Lung Cancer	-0.436	0.634	-0.688	0.491	1
AR	Non-Small Cell Lung Cancer	factor(sample_subtypes)others	-0.804	1.18	-0.681	0.496	1
AR	Non-Small Cell Lung Cancer	factor(sample_subtypes)Pleomorphic Carcinoma of the Lung	-0.812	0.977	-0.832	0.406	1
AR	Non-Small Cell Lung Cancer	factor(sample_subtypes)Poorly Differentiated Non-Small Cell Lung Cancer	-2.051	0.907	-2.26	0.0238	0.282
AR	Non-Small Cell Lung Cancer	factor(sample_subtypes)Sarcomatoid Carcinoma of the Lung	-0.972	1.181	-0.823	0.411	1
AR	Non-Small Cell Lung Cancer	factor(sample_all$sex)Male	-0.752	0.126	-5.955	2.6e-09	1.1e-07
AR	Non-Small Cell Lung Cancer	factor(sample_status)1	-0.035	0.115	-0.308	0.758	1
AR	Ovarian Cancer	factor(aya_status)1	1.202	0.538	2.236	0.0254	0.295
AR	Ovarian Cancer	TMB	0.011	0.005	2.003	0.0452	0.454
AR	Ovarian Cancer	factor(sample_subtypes)Endometrioid Ovarian Cancer	0.313	0.666	0.47	0.638	1
AR	Ovarian Cancer	factor(sample_subtypes)High-Grade Serous Fallopian Tube Cancer	-15.631	1265.35	-0.012	0.99	1
AR	Ovarian Cancer	factor(sample_subtypes)High-Grade Serous Ovarian Cancer	-0.139	0.54	-0.258	0.797	1
AR	Ovarian Cancer	factor(sample_subtypes)Low-Grade Serous Ovarian Cancer	-0.868	0.877	-0.989	0.323	1
AR	Ovarian Cancer	factor(sample_subtypes)Mixed Ovarian Carcinoma	-0.054	1.123	-0.048	0.962	1
AR	Ovarian Cancer	factor(sample_subtypes)Mucinous Ovarian Cancer	-0.138	0.897	-0.154	0.878	1
AR	Ovarian Cancer	factor(sample_subtypes)others	-15.877	1816.41	-0.009	0.993	1
AR	Ovarian Cancer	factor(sample_subtypes)Ovarian Cancer, Other	-15.7	1902.68	-0.008	0.993	1
AR	Ovarian Cancer	factor(sample_subtypes)Ovarian Carcinosarcoma/Malignant Mixed Mesodermal Tumor	-0.724	1.123	-0.645	0.519	1
AR	Ovarian Cancer	factor(sample_subtypes)Ovarian Epithelial Tumor	-15.751	1417.56	-0.011	0.991	1
AR	Ovarian Cancer	factor(sample_subtypes)Serous Borderline Ovarian Tumor	-16.208	1779.96	-0.009	0.993	1
AR	Ovarian Cancer	factor(sample_subtypes)Serous Ovarian Cancer	0.415	0.767	0.541	0.589	1
AR	Ovarian Cancer	factor(sample_subtypes)Small Cell Carcinoma of the Ovary	-16.348	2195.04	-0.007	0.994	1
AR	Ovarian Cancer	factor(sample_status)1	-0.374	0.311	-1.203	0.229	1
AR	Cancer of Unknown Primary	factor(aya_status)1	-25.126	608.091	-0.041	0.967	1
AR	Cancer of Unknown Primary	TMB	0.042	0.005	8.352	6.71e-17	5.09e-15
AR	Cancer of Unknown Primary	factor(sample_subtypes)Cancer of Unknown Primary	0.128	0.418	0.306	0.76	1
AR	Cancer of Unknown Primary	factor(sample_subtypes)Cancer of Unknown Primary, NOS	-0.436	0.741	-0.588	0.556	1
AR	Cancer of Unknown Primary	factor(sample_subtypes)Neuroendocrine Carcinoma, NOS	1.09	0.521	2.094	0.0363	0.387
AR	Cancer of Unknown Primary	factor(sample_subtypes)Neuroendocrine Tumor, NOS	0.553	0.555	0.997	0.319	1
AR	Cancer of Unknown Primary	factor(sample_subtypes)others	-13.214	1252.31	-0.011	0.992	1
AR	Cancer of Unknown Primary	factor(sample_subtypes)Poorly Differentiated Carcinoma, NOS	0.201	0.522	0.384	0.701	1
AR	Cancer of Unknown Primary	factor(sample_subtypes)Small Cell Carcinoma of Unknown Primary	-1.179	1.626	-0.725	0.468	1
AR	Cancer of Unknown Primary	factor(sample_subtypes)Squamous Cell Carcinoma, NOS	0.439	0.529	0.831	0.406	1
AR	Cancer of Unknown Primary	factor(sample_subtypes)Undifferentiated Malignant Neoplasm	-0.44	1.071	-0.411	0.681	1
AR	Cancer of Unknown Primary	factor(sample_all$sex)Male	-0.536	0.293	-1.826	0.0678	0.603
AR	Cancer of Unknown Primary	factor(sample_all$sex)Unknown	12.163	4002.64	0.003	0.998	1
AR	Cancer of Unknown Primary	factor(sample_status)1	0.144	0.328	0.438	0.662	1
AR	Esophagogastric Cancer	factor(aya_status)1	-0.331	0.604	-0.549	0.583	1
AR	Esophagogastric Cancer	TMB	0.04	0.006	6.874	6.25e-12	3.37e-10
AR	Esophagogastric Cancer	factor(sample_subtypes)Diffuse Type Stomach Adenocarcinoma	-13.017	451.855	-0.029	0.977	1
AR	Esophagogastric Cancer	factor(sample_subtypes)Esophageal Adenocarcinoma	0.027	0.381	0.072	0.943	1
AR	Esophagogastric Cancer	factor(sample_subtypes)Esophageal Poorly Differentiated Carcinoma	-0.21	1.064	-0.197	0.844	1
AR	Esophagogastric Cancer	factor(sample_subtypes)Esophageal Squamous Cell Carcinoma	-0.799	0.784	-1.019	0.308	1
AR	Esophagogastric Cancer	factor(sample_subtypes)Esophagogastric Adenocarcinoma	0.642	0.435	1.477	0.14	0.929
AR	Esophagogastric Cancer	factor(sample_subtypes)Intestinal Type Stomach Adenocarcinoma	1.151	0.711	1.619	0.105	0.795
AR	Esophagogastric Cancer	factor(sample_subtypes)others	1.012	0.862	1.174	0.241	1
AR	Esophagogastric Cancer	factor(sample_subtypes)Poorly Differentiated Carcinoma of the Stomach	0.192	0.631	0.304	0.761	1
AR	Esophagogastric Cancer	factor(sample_subtypes)Signet Ring Cell Carcinoma of the Stomach	0.01	0.794	0.012	0.99	1
AR	Esophagogastric Cancer	factor(sample_subtypes)Stomach Adenocarcinoma	-0.056	0.404	-0.138	0.89	1
AR	Esophagogastric Cancer	factor(sample_subtypes)Tubular Stomach Adenocarcinoma	1.053	0.838	1.257	0.209	1
AR	Esophagogastric Cancer	factor(sample_all$sex)Male	0.005	0.263	0.02	0.984	1
AR	Esophagogastric Cancer	factor(sample_status)1	0.13	0.269	0.485	0.628	1
AR	Renal Cell Carcinoma	factor(aya_status)1	-16.312	2283.98	-0.007	0.994	1
AR	Renal Cell Carcinoma	TMB	0.075	0.036	2.108	0.0351	0.378
AR	Renal Cell Carcinoma	factor(sample_subtypes)Collecting Duct Renal Cell Carcinoma	19.314	3118.61	0.006	0.995	1
AR	Renal Cell Carcinoma	factor(sample_subtypes)FH-Deficient Renal Cell Carcinoma	0.634	7795.75	0	1	1
AR	Renal Cell Carcinoma	factor(sample_subtypes)others	-0.173	6041.28	0	1	1
AR	Renal Cell Carcinoma	factor(sample_subtypes)Papillary Renal Cell Carcinoma	16.906	3118.61	0.005	0.996	1
AR	Renal Cell Carcinoma	factor(sample_subtypes)Renal Angiomyolipoma	0.017	6513.89	0	1	1
AR	Renal Cell Carcinoma	factor(sample_subtypes)Renal Cell Carcinoma	16.646	3118.61	0.005	0.996	1
AR	Renal Cell Carcinoma	factor(sample_subtypes)Renal Clear Cell Carcinoma	16.653	3118.61	0.005	0.996	1
AR	Renal Cell Carcinoma	factor(sample_subtypes)Renal Medullary Carcinoma	1.175	7188.02	0	1	1
AR	Renal Cell Carcinoma	factor(sample_subtypes)Renal Non-Clear Cell Carcinoma	0.995	6850.9	0	1	1
AR	Renal Cell Carcinoma	factor(sample_subtypes)Renal Oncocytoma	0.485	5735.79	0	1	1
AR	Renal Cell Carcinoma	factor(sample_subtypes)Sarcomatoid Renal Cell Carcinoma	-0.009	6808.99	0	1	1
AR	Renal Cell Carcinoma	factor(sample_subtypes)Translocation-Associated Renal Cell Carcinoma	0.154	5478.24	0	1	1
AR	Renal Cell Carcinoma	factor(sample_subtypes)Unclassified Renal Cell Carcinoma	16.486	3118.61	0.005	0.996	1
AR	Renal Cell Carcinoma	factor(sample_all$sex)Male	-1.267	0.618	-2.049	0.0404	0.419
AR	Renal Cell Carcinoma	factor(sample_status)1	0.616	0.612	1.006	0.314	1
AR	Hepatobiliary Cancer	factor(aya_status)1	-0.466	1.036	-0.45	0.653	1
AR	Hepatobiliary Cancer	TMB	0.027	0.018	1.482	0.138	0.923
AR	Hepatobiliary Cancer	factor(sample_subtypes)Extrahepatic Cholangiocarcinoma	-0.096	0.874	-0.11	0.913	1
AR	Hepatobiliary Cancer	factor(sample_subtypes)Fibrolamellar Carcinoma	-14.946	1667.37	-0.009	0.993	1
AR	Hepatobiliary Cancer	factor(sample_subtypes)Gallbladder Adenocarcinoma, NOS	-15.539	1269.51	-0.012	0.99	1
AR	Hepatobiliary Cancer	factor(sample_subtypes)Gallbladder Cancer	-0.592	0.882	-0.672	0.502	1
AR	Hepatobiliary Cancer	factor(sample_subtypes)Hepatoblastoma	-15.158	1922.37	-0.008	0.994	1
AR	Hepatobiliary Cancer	factor(sample_subtypes)Hepatocellular Carcinoma	0.309	0.663	0.467	0.641	1
AR	Hepatobiliary Cancer	factor(sample_subtypes)Hepatocellular Carcinoma plus Intrahepatic Cholangiocarcinoma	0.335	1.133	0.296	0.767	1
AR	Hepatobiliary Cancer	factor(sample_subtypes)Intrahepatic Cholangiocarcinoma	0.327	0.594	0.55	0.582	1
AR	Hepatobiliary Cancer	factor(sample_subtypes)others	-15.479	2663.05	-0.006	0.995	1
AR	Hepatobiliary Cancer	factor(sample_subtypes)Perihilar Cholangiocarcinoma	1.264	1.147	1.102	0.271	1
AR	Hepatobiliary Cancer	factor(sample_all$sex)Male	-0.647	0.411	-1.573	0.116	0.839
AR	Hepatobiliary Cancer	factor(sample_status)1	-0.042	0.456	-0.091	0.927	1
AR	Pancreatic Cancer	factor(aya_status)1	0.097	1.034	0.094	0.925	1
AR	Pancreatic Cancer	TMB	0.024	0.005	4.543	5.55e-06	0.000152
AR	Pancreatic Cancer	factor(sample_subtypes)Adenosquamous Carcinoma of the Pancreas	-15.699	1461.12	-0.011	0.991	1
AR	Pancreatic Cancer	factor(sample_subtypes)Intraductal Papillary Mucinous Neoplasm	-15.765	2291.88	-0.007	0.995	1
AR	Pancreatic Cancer	factor(sample_subtypes)others	-15.707	2873.28	-0.005	0.996	1
AR	Pancreatic Cancer	factor(sample_subtypes)Pancreatic Adenocarcinoma	-0.546	1.031	-0.529	0.596	1
AR	Pancreatic Cancer	factor(sample_subtypes)Pancreatic Neuroendocrine Tumor	-0.92	1.158	-0.794	0.427	1
AR	Pancreatic Cancer	factor(sample_subtypes)Solid Pseudopapillary Neoplasm of the Pancreas	-15.601	2462.92	-0.006	0.995	1
AR	Pancreatic Cancer	factor(sample_subtypes)Undifferentiated Carcinoma of the Pancreas	-15.685	1896.84	-0.008	0.993	1
AR	Pancreatic Cancer	factor(sample_all$sex)Male	0.113	0.33	0.344	0.731	1
AR	Pancreatic Cancer	factor(sample_status)1	-0.395	0.35	-1.129	0.259	1
AR	Mature B-Cell Neoplasms	factor(aya_status)1	-0.682	0.954	-0.714	0.475	1
AR	Mature B-Cell Neoplasms	TMB	0.044	0.016	2.695	0.00704	0.103
AR	Mature B-Cell Neoplasms	factor(sample_subtypes)Diffuse Large B-Cell Lymphoma, NOS	-1.035	0.55	-1.88	0.0601	0.556
AR	Mature B-Cell Neoplasms	factor(sample_subtypes)Follicular Lymphoma	-2.062	1.051	-1.962	0.0497	0.487
AR	Mature B-Cell Neoplasms	factor(sample_subtypes)Mantle Cell Lymphoma	-15.565	1121.21	-0.014	0.989	1
AR	Mature B-Cell Neoplasms	factor(sample_subtypes)Marginal Zone Lymphoma	-15.74	1511.93	-0.01	0.992	1
AR	Mature B-Cell Neoplasms	factor(sample_subtypes)Mature B-Cell Neoplasms	0.137	0.566	0.243	0.808	1
AR	Mature B-Cell Neoplasms	factor(sample_subtypes)others	-1.053	1.059	-0.994	0.32	1
AR	Mature B-Cell Neoplasms	factor(sample_subtypes)Plasma Cell Myeloma	-0.557	0.59	-0.944	0.345	1
AR	Mature B-Cell Neoplasms	factor(sample_all$sex)Male	-0.871	0.392	-2.221	0.0264	0.305
AR	Mature B-Cell Neoplasms	factor(sample_status)1	-0.043	0.784	-0.055	0.956	1
AR	Head and Neck Cancer	factor(aya_status)1	-0.338	1.058	-0.32	0.749	1
AR	Head and Neck Cancer	TMB	0.04	0.013	3.141	0.00169	0.0289
[truncated: 109,526 more rows]

## Sheet: model_site
Gene	Cancer Type	Variable	Estimate	Std..Error	z.value	P value	FDR
BRAF	Glioma	factor(aya_status)1	0.063	0.159	0.395	0.693	1
BRAF	Glioma	relevel(factor(sample_assay), ref = sit_ref)COLU	1.372	0.822	1.67	0.095	0.934
BRAF	Glioma	relevel(factor(sample_assay), ref = sit_ref)DUKE	0.145	0.418	0.347	0.729	1
BRAF	Glioma	relevel(factor(sample_assay), ref = sit_ref)MSK	-0.448	0.169	-2.65	0.00804	0.247
BRAF	Glioma	relevel(factor(sample_assay), ref = sit_ref)PHS	-0.075	0.571	-0.131	0.896	1
BRAF	Glioma	relevel(factor(sample_assay), ref = sit_ref)UCHI	-17.304	1780.54	-0.01	0.992	1
BRAF	Glioma	relevel(factor(sample_assay), ref = sit_ref)UCSF	-0.277	0.185	-1.493	0.135	1
BRAF	Glioma	relevel(factor(sample_assay), ref = sit_ref)VICC	0.123	0.575	0.214	0.83	1
BRAF	Glioma	factor(sample_subtypes)Anaplastic Oligoastrocytoma	-13.543	607.501	-0.022	0.982	1
BRAF	Glioma	factor(sample_subtypes)Anaplastic Oligodendroglioma	-1.091	1.085	-1.006	0.315	1
BRAF	Glioma	factor(sample_subtypes)Anaplastic Pleomorphic Xanthoastrocytoma	5.335	0.668	7.989	1.36e-15	2.05e-12
BRAF	Glioma	factor(sample_subtypes)Astrocytoma	1.497	0.474	3.158	0.00159	0.0842
BRAF	Glioma	factor(sample_subtypes)Diffuse Astrocytoma	-0.557	1.089	-0.511	0.609	1
BRAF	Glioma	factor(sample_subtypes)Diffuse Glioma	1.498	0.52	2.879	0.00399	0.157
BRAF	Glioma	factor(sample_subtypes)Diffuse Intrinsic Pontine Glioma	-13.4	518.913	-0.026	0.979	1
BRAF	Glioma	factor(sample_subtypes)Dysembryoplastic Neuroepithelial Tumor	1.997	0.858	2.326	0.02	0.428
BRAF	Glioma	factor(sample_subtypes)Encapsulated Glioma	2.367	0.691	3.424	0.000616	0.043
BRAF	Glioma	factor(sample_subtypes)Ependymoma	-13.493	427.329	-0.032	0.975	1
BRAF	Glioma	factor(sample_subtypes)Ganglioglioma	4.019	0.468	8.588	8.82e-18	1.78e-14
BRAF	Glioma	factor(sample_subtypes)Glioblastoma	0.59	0.456	1.292	0.196	1
BRAF	Glioma	factor(sample_subtypes)Glioblastoma Multiforme	0.932	0.433	2.151	0.0315	0.549
BRAF	Glioma	factor(sample_subtypes)Glioma, NOS	1.77	0.585	3.024	0.0025	0.115
BRAF	Glioma	factor(sample_subtypes)Gliosarcoma	2.441	0.566	4.311	1.62e-05	0.00251
BRAF	Glioma	factor(sample_subtypes)High-Grade Glioma, NOS	1.311	0.499	2.629	0.00857	0.259
BRAF	Glioma	factor(sample_subtypes)Low-Grade Glioma, NOS	2.607	0.462	5.642	1.68e-08	7.37e-06
BRAF	Glioma	factor(sample_subtypes)Oligoastrocytoma	-13.606	804.993	-0.017	0.987	1
BRAF	Glioma	factor(sample_subtypes)Oligodendroglioma	0.623	0.548	1.138	0.255	1
BRAF	Glioma	factor(sample_subtypes)others	3.189	0.641	4.977	6.45e-07	0.000171
BRAF	Glioma	factor(sample_subtypes)Pilocytic Astrocytoma	1.838	0.483	3.808	0.00014	0.0143
BRAF	Glioma	factor(sample_subtypes)Pilomyxoid Astrocytoma	2.92	0.725	4.029	5.61e-05	0.00696
BRAF	Glioma	factor(sample_subtypes)Pleomorphic Xanthoastrocytoma	5.436	0.657	8.278	1.25e-16	2.21e-13
BRAF	Glioma	factor(sample_all$sex)Male	-0.231	0.126	-1.83	0.0672	0.797
BRAF	Glioma	factor(sample_status)1	0.051	0.253	0.202	0.84	1
BRAF	Breast Cancer	factor(aya_status)1	0.181	0.364	0.497	0.619	1
BRAF	Breast Cancer	relevel(factor(sample_assay), ref = sit_ref)COLU	5.2	1.675	3.104	0.00191	0.0958
BRAF	Breast Cancer	relevel(factor(sample_assay), ref = sit_ref)DFCI	0.615	0.277	2.222	0.0263	0.496
BRAF	Breast Cancer	relevel(factor(sample_assay), ref = sit_ref)DUKE	1.353	0.512	2.642	0.00823	0.252
BRAF	Breast Cancer	relevel(factor(sample_assay), ref = sit_ref)PHS	1.204	1.07	1.125	0.261	1
BRAF	Breast Cancer	relevel(factor(sample_assay), ref = sit_ref)UCHI	-11.987	3956.18	-0.003	0.998	1
BRAF	Breast Cancer	relevel(factor(sample_assay), ref = sit_ref)UCSF	0.515	1.048	0.491	0.623	1
BRAF	Breast Cancer	relevel(factor(sample_assay), ref = sit_ref)VICC	0.464	0.618	0.752	0.452	1
BRAF	Breast Cancer	factor(sample_subtypes)Breast Invasive Cancer, NOS	14.391	605.598	0.024	0.981	1
BRAF	Breast Cancer	factor(sample_subtypes)Breast Invasive Carcinoma, NOS	13.609	605.598	0.022	0.982	1
BRAF	Breast Cancer	factor(sample_subtypes)Breast Invasive Ductal Carcinoma	13.306	605.598	0.022	0.982	1
BRAF	Breast Cancer	factor(sample_subtypes)Breast Invasive Lobular Carcinoma	12.871	605.598	0.021	0.983	1
BRAF	Breast Cancer	factor(sample_subtypes)Breast Invasive Mixed Mucinous Carcinoma	15.053	605.598	0.025	0.98	1
BRAF	Breast Cancer	factor(sample_subtypes)Breast Mixed Ductal and Lobular Carcinoma	12.659	605.598	0.021	0.983	1
BRAF	Breast Cancer	factor(sample_subtypes)Invasive Breast Carcinoma	13.598	605.598	0.022	0.982	1
BRAF	Breast Cancer	factor(sample_subtypes)Metaplastic Breast Cancer	15.709	605.598	0.026	0.979	1
BRAF	Breast Cancer	factor(sample_subtypes)others	14.243	605.598	0.024	0.981	1
BRAF	Breast Cancer	factor(sample_all$sex)Male	-0.612	1.41	-0.434	0.664	1
BRAF	Breast Cancer	factor(sample_status)1	0.185	0.272	0.679	0.497	1
BRAF	Colorectal Cancer	factor(aya_status)1	-0.332	0.14	-2.369	0.0178	0.4
BRAF	Colorectal Cancer	relevel(factor(sample_assay), ref = sit_ref)COLU	0.078	0.175	0.448	0.654	1
BRAF	Colorectal Cancer	relevel(factor(sample_assay), ref = sit_ref)DFCI	0.126	0.082	1.534	0.125	1
BRAF	Colorectal Cancer	relevel(factor(sample_assay), ref = sit_ref)DUKE	-0.367	0.26	-1.41	0.159	1
BRAF	Colorectal Cancer	relevel(factor(sample_assay), ref = sit_ref)PHS	-0.212	0.296	-0.715	0.474	1
BRAF	Colorectal Cancer	relevel(factor(sample_assay), ref = sit_ref)UCHI	-1.616	0.719	-2.246	0.0247	0.481
BRAF	Colorectal Cancer	relevel(factor(sample_assay), ref = sit_ref)UCSF	-0.043	0.34	-0.128	0.898	1
BRAF	Colorectal Cancer	relevel(factor(sample_assay), ref = sit_ref)VICC	-0.203	0.221	-0.916	0.36	1
BRAF	Colorectal Cancer	factor(sample_subtypes)Colorectal Adenocarcinoma	-0.36	0.127	-2.842	0.00448	0.17
BRAF	Colorectal Cancer	factor(sample_subtypes)Mucinous Adenocarcinoma of the Colon and Rectum	0.87	0.173	5.041	4.62e-07	0.000127
BRAF	Colorectal Cancer	factor(sample_subtypes)others	1.925	0.492	3.915	9.04e-05	0.0102
BRAF	Colorectal Cancer	factor(sample_subtypes)Rectal Adenocarcinoma	-1.062	0.133	-7.963	1.68e-15	2.46e-12
BRAF	Colorectal Cancer	factor(sample_subtypes)Signet Ring Cell Adenocarcinoma of the Colon and Rectum	-0.905	0.73	-1.24	0.215	1
BRAF	Colorectal Cancer	factor(sample_all$sex)Male	-0.269	0.074	-3.618	0.000297	0.0252
BRAF	Colorectal Cancer	factor(sample_status)1	-0.421	0.087	-4.843	1.28e-06	0.000301
BRAF	Soft Tissue Sarcoma	factor(aya_status)1	-2.04	1.035	-1.972	0.0486	0.681
BRAF	Soft Tissue Sarcoma	relevel(factor(sample_assay), ref = sit_ref)COLU	-16.823	14724.2	-0.001	0.999	1
BRAF	Soft Tissue Sarcoma	relevel(factor(sample_assay), ref = sit_ref)DFCI	-0.086	0.428	-0.2	0.841	1
BRAF	Soft Tissue Sarcoma	relevel(factor(sample_assay), ref = sit_ref)DUKE	-17.775	29232.4	-0.001	1	1
BRAF	Soft Tissue Sarcoma	relevel(factor(sample_assay), ref = sit_ref)PHS	-17.114	14331.8	-0.001	0.999	1
BRAF	Soft Tissue Sarcoma	relevel(factor(sample_assay), ref = sit_ref)UCHI	-0.275	20837.2	0	1	1
BRAF	Soft Tissue Sarcoma	relevel(factor(sample_assay), ref = sit_ref)UCSF	1.1	0.606	1.815	0.0695	0.811
BRAF	Soft Tissue Sarcoma	relevel(factor(sample_assay), ref = sit_ref)VICC	-16.468	6706.71	-0.002	0.998	1
BRAF	Soft Tissue Sarcoma	factor(sample_subtypes)Alveolar Soft Part Sarcoma	0.508	6610.91	0	1	1
BRAF	Soft Tissue Sarcoma	factor(sample_subtypes)Angiosarcoma	18.264	4163.28	0.004	0.996	1
BRAF	Soft Tissue Sarcoma	factor(sample_subtypes)Clear Cell Sarcoma	0.554	6746.11	0	1	1
BRAF	Soft Tissue Sarcoma	factor(sample_subtypes)Dedifferentiated Liposarcoma	-0.208	4557.38	0	1	1
BRAF	Soft Tissue Sarcoma	factor(sample_subtypes)Desmoid/Aggressive Fibromatosis	-0.017	5337.31	0	1	1
BRAF	Soft Tissue Sarcoma	factor(sample_subtypes)Desmoplastic Small-Round-Cell Tumor	17.526	4163.28	0.004	0.997	1
BRAF	Soft Tissue Sarcoma	factor(sample_subtypes)Embryonal Rhabdomyosarcoma	-0.23	5413.69	0	1	1
BRAF	Soft Tissue Sarcoma	factor(sample_subtypes)Epithelioid Hemangioendothelioma	0.076	6040.8	0	1	1
BRAF	Soft Tissue Sarcoma	factor(sample_subtypes)Epithelioid Sarcoma	0.205	6067.57	0	1	1
BRAF	Soft Tissue Sarcoma	factor(sample_subtypes)Fibrosarcoma	0.125	8357.4	0	1	1
BRAF	Soft Tissue Sarcoma	factor(sample_subtypes)Follicular Dendritic Cell Sarcoma	-0.246	8548.05	0	1	1
BRAF	Soft Tissue Sarcoma	factor(sample_subtypes)Hemangioma	17.463	4163.28	0.004	0.997	1
BRAF	Soft Tissue Sarcoma	factor(sample_subtypes)Inflammatory Myofibroblastic Tumor	18.511	4163.28	0.004	0.996	1
BRAF	Soft Tissue Sarcoma	factor(sample_subtypes)Intimal Sarcoma	0.193	7350.93	0	1	1
BRAF	Soft Tissue Sarcoma	factor(sample_subtypes)Leiomyosarcoma	17.201	4163.28	0.004	0.997	1
BRAF	Soft Tissue Sarcoma	factor(sample_subtypes)Liposarcoma	0.155	6922.42	0	1	1
BRAF	Soft Tissue Sarcoma	factor(sample_subtypes)Myxofibrosarcoma	17.083	4163.28	0.004	0.997	1
BRAF	Soft Tissue Sarcoma	factor(sample_subtypes)Myxoid/Round-Cell Liposarcoma	0.113	5309.62	0	1	1
BRAF	Soft Tissue Sarcoma	factor(sample_subtypes)others	17.569	4163.28	0.004	0.997	1
BRAF	Soft Tissue Sarcoma	factor(sample_subtypes)Perivascular Epithelioid Cell Tumor	0.049	6149.26	0	1	1
BRAF	Soft Tissue Sarcoma	factor(sample_subtypes)Pleomorphic Liposarcoma	-0.02	6237.97	0	1	1
BRAF	Soft Tissue Sarcoma	factor(sample_subtypes)Radiation-Associated Sarcoma	18.768	4163.28	0.005	0.996	1
BRAF	Soft Tissue Sarcoma	factor(sample_subtypes)Rhabdomyosarcoma	-0.213	5421.7	0	1	1
BRAF	Soft Tissue Sarcoma	factor(sample_subtypes)Round Cell Sarcoma, NOS	18.116	4163.28	0.004	0.997	1
BRAF	Soft Tissue Sarcoma	factor(sample_subtypes)Sarcoma, NOS	17.343	4163.28	0.004	0.997	1
BRAF	Soft Tissue Sarcoma	factor(sample_subtypes)Soft Tissue Myoepithelial Carcinoma	0.435	8155.19	0	1	1
BRAF	Soft Tissue Sarcoma	factor(sample_subtypes)Solitary Fibrous Tumor/Hemangiopericytoma	16.922	4163.28	0.004	0.997	1
BRAF	Soft Tissue Sarcoma	factor(sample_subtypes)Synovial Sarcoma	0.375	4784.18	0	1	1
BRAF	Soft Tissue Sarcoma	factor(sample_subtypes)Undifferentiated Pleomorphic Sarcoma/Malignant Fibrous Histiocytoma/High-Grade Spindle Cell Sarcoma	17.747	4163.28	0.004	0.997	1
BRAF	Soft Tissue Sarcoma	factor(sample_subtypes)Well-Differentiated Liposarcoma	-0.158	5241	0	1	1
BRAF	Soft Tissue Sarcoma	factor(sample_all$sex)Male	0.42	0.371	1.133	0.257	1
BRAF	Soft Tissue Sarcoma	factor(sample_status)1	-0.122	0.439	-0.279	0.78	1
BRAF	Germ Cell Tumor	factor(aya_status)1	-0.92	0.749	-1.228	0.219	1
BRAF	Germ Cell Tumor	relevel(factor(sample_assay), ref = sit_ref)DFCI	1.294	0.782	1.655	0.0979	0.947
BRAF	Germ Cell Tumor	relevel(factor(sample_assay), ref = sit_ref)DUKE	5.403	1.655	3.265	0.00109	0.0645
BRAF	Germ Cell Tumor	relevel(factor(sample_assay), ref = sit_ref)PHS	-18.16	29232.4	-0.001	1	1
BRAF	Germ Cell Tumor	relevel(factor(sample_assay), ref = sit_ref)UCHI	-14.683	18822.6	-0.001	0.999	1
BRAF	Germ Cell Tumor	relevel(factor(sample_assay), ref = sit_ref)UCSF	-16.48	6322.46	-0.003	0.998	1
BRAF	Germ Cell Tumor	relevel(factor(sample_assay), ref = sit_ref)VICC	-17.881	20670.5	-0.001	0.999	1
BRAF	Germ Cell Tumor	factor(sample_subtypes)Embryonal Carcinoma	-0.025	6870.16	0	1	1
BRAF	Germ Cell Tumor	factor(sample_subtypes)Germ Cell Tumor with Somatic-Type Malignancy	18.241	5535.45	0.003	0.997	1
BRAF	Germ Cell Tumor	factor(sample_subtypes)Immature Teratoma	0.842	7802.82	0	1	1
BRAF	Germ Cell Tumor	factor(sample_subtypes)Mature Teratoma	0.193	7584.97	0	1	1
BRAF	Germ Cell Tumor	factor(sample_subtypes)Mixed Germ Cell Tumor	16.971	5535.45	0.003	0.998	1
BRAF	Germ Cell Tumor	factor(sample_subtypes)Non-Seminomatous Germ Cell Tumor	-0.161	6744.98	0	1	1
BRAF	Germ Cell Tumor	factor(sample_subtypes)others	18.199	5535.45	0.003	0.997	1
BRAF	Germ Cell Tumor	factor(sample_subtypes)Seminoma	17.25	5535.45	0.003	0.998	1
BRAF	Germ Cell Tumor	factor(sample_subtypes)Teratoma	-1.138	8350.98	0	1	1
BRAF	Germ Cell Tumor	factor(sample_subtypes)Yolk Sac Tumor	17.646	5535.45	0.003	0.997	1
BRAF	Germ Cell Tumor	factor(sample_all$sex)Male	0.469	1.18	0.397	0.691	1
BRAF	Germ Cell Tumor	factor(sample_status)1	1.398	0.78	1.792	0.0732	0.831
BRAF	Melanoma	factor(aya_status)1	0.55	0.15	3.663	0.000249	0.0223
BRAF	Melanoma	relevel(factor(sample_assay), ref = sit_ref)COLU	-0.182	0.276	-0.66	0.509	1
BRAF	Melanoma	relevel(factor(sample_assay), ref = sit_ref)DFCI	0.032	0.136	0.234	0.815	1
BRAF	Melanoma	relevel(factor(sample_assay), ref = sit_ref)DUKE	1.17	0.881	1.328	0.184	1
BRAF	Melanoma	relevel(factor(sample_assay), ref = sit_ref)PHS	0.284	0.251	1.134	0.257	1
BRAF	Melanoma	relevel(factor(sample_assay), ref = sit_ref)UCHI	-3.119	1.02	-3.057	0.00224	0.107
BRAF	Melanoma	relevel(factor(sample_assay), ref = sit_ref)UCSF	-0.456	0.24	-1.901	0.0573	0.735
BRAF	Melanoma	relevel(factor(sample_assay), ref = sit_ref)VICC	-0.01	0.152	-0.063	0.95	1
BRAF	Melanoma	factor(sample_subtypes)Anorectal Mucosal Melanoma	-1.036	0.532	-1.945	0.0517	0.701
BRAF	Melanoma	factor(sample_subtypes)Cutaneous Melanoma	1.612	0.275	5.855	4.77e-09	2.38e-06
BRAF	Melanoma	factor(sample_subtypes)Desmoplastic Melanoma	-0.842	1.068	-0.789	0.43	1
BRAF	Melanoma	factor(sample_subtypes)Head and Neck Mucosal Melanoma	0.138	0.425	0.326	0.745	1
BRAF	Melanoma	factor(sample_subtypes)Melanoma	1.38	0.297	4.647	3.37e-06	0.000679
BRAF	Melanoma	factor(sample_subtypes)Melanoma of Unknown Primary	1.685	0.301	5.598	2.17e-08	9.18e-06
BRAF	Melanoma	factor(sample_subtypes)Mucosal Melanoma of the Vulva/Vagina	-0.271	0.484	-0.561	0.575	1
BRAF	Melanoma	factor(sample_subtypes)Ocular Melanoma	-1.055	1.061	-0.995	0.32	1
BRAF	Melanoma	factor(sample_subtypes)others	-0.179	0.593	-0.302	0.763	1
BRAF	Melanoma	factor(sample_subtypes)Uveal Melanoma	-3.161	1.039	-3.043	0.00234	0.11
BRAF	Melanoma	factor(sample_all$sex)Male	-0.027	0.088	-0.308	0.758	1
BRAF	Melanoma	factor(sample_status)1	0.095	0.098	0.974	0.33	1
BRAF	Thyroid Cancer	factor(aya_status)1	-0.738	0.185	-3.984	6.76e-05	0.0081
BRAF	Thyroid Cancer	relevel(factor(sample_assay), ref = sit_ref)COLU	-2.025	0.804	-2.519	0.0118	0.315
BRAF	Thyroid Cancer	relevel(factor(sample_assay), ref = sit_ref)DFCI	-0.062	0.161	-0.382	0.702	1
BRAF	Thyroid Cancer	relevel(factor(sample_assay), ref = sit_ref)DUKE	-0.765	0.965	-0.792	0.428	1
BRAF	Thyroid Cancer	relevel(factor(sample_assay), ref = sit_ref)UCHI	-19.386	2279.11	-0.009	0.993	1
BRAF	Thyroid Cancer	relevel(factor(sample_assay), ref = sit_ref)UCSF	0.305	0.411	0.742	0.458	1
BRAF	Thyroid Cancer	relevel(factor(sample_assay), ref = sit_ref)VICC	0.141	0.591	0.238	0.812	1
BRAF	Thyroid Cancer	factor(sample_subtypes)Follicular Thyroid Cancer	-3.149	1.034	-3.047	0.00231	0.109
BRAF	Thyroid Cancer	factor(sample_subtypes)Hurthle Cell Thyroid Cancer	-18.173	781.797	-0.023	0.981	1
BRAF	Thyroid Cancer	factor(sample_subtypes)Medullary Thyroid Cancer	-18.102	606.34	-0.03	0.976	1
BRAF	Thyroid Cancer	factor(sample_subtypes)others	-0.703	0.722	-0.973	0.33	1
BRAF	Thyroid Cancer	factor(sample_subtypes)Papillary Thyroid Cancer	1.229	0.208	5.905	3.54e-09	1.84e-06
BRAF	Thyroid Cancer	factor(sample_subtypes)Poorly Differentiated Thyroid Cancer	-1.05	0.27	-3.885	0.000102	0.0113
BRAF	Thyroid Cancer	factor(sample_all$sex)Male	0.16	0.142	1.129	0.259	1
BRAF	Thyroid Cancer	factor(sample_status)1	0.326	0.154	2.121	0.0339	0.57
BRAF	Non-Small Cell Lung Cancer	factor(aya_status)1	-2.277	1.005	-2.266	0.0234	0.468
BRAF	Non-Small Cell Lung Cancer	relevel(factor(sample_assay), ref = sit_ref)COLU	-0.235	0.231	-1.017	0.309	1
BRAF	Non-Small Cell Lung Cancer	relevel(factor(sample_assay), ref = sit_ref)DFCI	0.187	0.091	2.067	0.0387	0.609
BRAF	Non-Small Cell Lung Cancer	relevel(factor(sample_assay), ref = sit_ref)DUKE	0.358	0.247	1.447	0.148	1
BRAF	Non-Small Cell Lung Cancer	relevel(factor(sample_assay), ref = sit_ref)PHS	-0.615	0.261	-2.354	0.0186	0.41
BRAF	Non-Small Cell Lung Cancer	relevel(factor(sample_assay), ref = sit_ref)UCHI	-0.73	1.017	-0.718	0.473	1
BRAF	Non-Small Cell Lung Cancer	relevel(factor(sample_assay), ref = sit_ref)UCSF	0.284	0.374	0.759	0.448	1
BRAF	Non-Small Cell Lung Cancer	relevel(factor(sample_assay), ref = sit_ref)VICC	-0.098	0.369	-0.267	0.79	1
BRAF	Non-Small Cell Lung Cancer	factor(sample_subtypes)Large Cell Lung Carcinoma	1.592	1.444	1.103	0.27	1
BRAF	Non-Small Cell Lung Cancer	factor(sample_subtypes)Large Cell Neuroendocrine Carcinoma	1.887	1.052	1.795	0.0727	0.828
BRAF	Non-Small Cell Lung Cancer	factor(sample_subtypes)Lung Adenocarcinoma	1.49	1.008	1.478	0.14	1
BRAF	Non-Small Cell Lung Cancer	factor(sample_subtypes)Lung Adenosquamous Carcinoma	1.658	1.109	1.496	0.135	1
BRAF	Non-Small Cell Lung Cancer	factor(sample_subtypes)Lung Carcinoid	-12.188	197.656	-0.062	0.951	1
BRAF	Non-Small Cell Lung Cancer	factor(sample_subtypes)Lung Neuroendocrine Tumor	0.42	1.427	0.294	0.768	1
BRAF	Non-Small Cell Lung Cancer	factor(sample_subtypes)Lung Squamous Cell Carcinoma	0.534	1.028	0.52	0.603	1
BRAF	Non-Small Cell Lung Cancer	factor(sample_subtypes)Non-Small Cell Lung Cancer	1.586	1.023	1.551	0.121	1
BRAF	Non-Small Cell Lung Cancer	factor(sample_subtypes)others	2.45	1.117	2.193	0.0283	0.518
BRAF	Non-Small Cell Lung Cancer	factor(sample_subtypes)Pleomorphic Carcinoma of the Lung	1.527	1.17	1.304	0.192	1
BRAF	Non-Small Cell Lung Cancer	factor(sample_subtypes)Poorly Differentiated Non-Small Cell Lung Cancer	1.773	1.048	1.692	0.0907	0.916
BRAF	Non-Small Cell Lung Cancer	factor(sample_subtypes)Sarcomatoid Carcinoma of the Lung	1.542	1.171	1.316	0.188	1
BRAF	Non-Small Cell Lung Cancer	factor(sample_all$sex)Male	0.03	0.085	0.358	0.721	1
BRAF	Non-Small Cell Lung Cancer	factor(sample_status)1	-0.006	0.087	-0.065	0.948	1
BRAF	Ovarian Cancer	factor(aya_status)1	0.129	0.39	0.331	0.741	1
BRAF	Ovarian Cancer	relevel(factor(sample_assay), ref = sit_ref)DFCI	0.198	0.277	0.715	0.474	1
BRAF	Ovarian Cancer	relevel(factor(sample_assay), ref = sit_ref)DUKE	-0.086	0.677	-0.126	0.899	1
BRAF	Ovarian Cancer	relevel(factor(sample_assay), ref = sit_ref)PHS	2.811	1.143	2.46	0.0139	0.349
BRAF	Ovarian Cancer	relevel(factor(sample_assay), ref = sit_ref)UCSF	-1.026	1.039	-0.987	0.324	1
BRAF	Ovarian Cancer	relevel(factor(sample_assay), ref = sit_ref)VICC	0.277	0.756	0.366	0.714	1
BRAF	Ovarian Cancer	factor(sample_subtypes)Endometrioid Ovarian Cancer	-0.811	0.599	-1.354	0.176	1
BRAF	Ovarian Cancer	factor(sample_subtypes)High-Grade Serous Fallopian Tube Cancer	-15.609	761.981	-0.02	0.984	1
BRAF	Ovarian Cancer	factor(sample_subtypes)High-Grade Serous Ovarian Cancer	-1.756	0.402	-4.368	1.25e-05	0.00201
BRAF	Ovarian Cancer	factor(sample_subtypes)Low-Grade Serous Ovarian Cancer	0.447	0.424	1.053	0.292	1
BRAF	Ovarian Cancer	factor(sample_subtypes)Mixed Ovarian Carcinoma	-2.006	1.298	-1.545	0.122	1
BRAF	Ovarian Cancer	factor(sample_subtypes)Mucinous Ovarian Cancer	-1.48	1.064	-1.39	0.164	1
BRAF	Ovarian Cancer	factor(sample_subtypes)others	0.575	0.647	0.889	0.374	1
BRAF	Ovarian Cancer	factor(sample_subtypes)Ovarian Cancer, Other	-1.241	1.214	-1.022	0.307	1
BRAF	Ovarian Cancer	factor(sample_subtypes)Ovarian Carcinosarcoma/Malignant Mixed Mesodermal Tumor	-2.089	1.082	-1.931	0.0535	0.712
BRAF	Ovarian Cancer	factor(sample_subtypes)Ovarian Epithelial Tumor	-0.051	0.689	-0.074	0.941	1
BRAF	Ovarian Cancer	factor(sample_subtypes)Serous Borderline Ovarian Tumor	2.036	0.493	4.134	3.56e-05	0.00488
BRAF	Ovarian Cancer	factor(sample_subtypes)Serous Ovarian Cancer	-0.347	0.631	-0.55	0.582	1
BRAF	Ovarian Cancer	factor(sample_subtypes)Small Cell Carcinoma of the Ovary	-15.794	1353.65	-0.012	0.991	1
BRAF	Ovarian Cancer	factor(sample_status)1	-0.471	0.277	-1.701	0.0889	0.908
BRAF	Cancer of Unknown Primary	factor(aya_status)1	-0.083	0.433	-0.191	0.849	1
BRAF	Cancer of Unknown Primary	relevel(factor(sample_assay), ref = sit_ref)COLU	-13.699	978.24	-0.014	0.989	1
BRAF	Cancer of Unknown Primary	relevel(factor(sample_assay), ref = sit_ref)DFCI	0.109	0.223	0.488	0.626	1
BRAF	Cancer of Unknown Primary	relevel(factor(sample_assay), ref = sit_ref)DUKE	0.452	0.567	0.797	0.426	1
BRAF	Cancer of Unknown Primary	relevel(factor(sample_assay), ref = sit_ref)PHS	-13.477	581.223	-0.023	0.982	1
BRAF	Cancer of Unknown Primary	relevel(factor(sample_assay), ref = sit_ref)UCHI	-13.982	903.855	-0.015	0.988	1
BRAF	Cancer of Unknown Primary	relevel(factor(sample_assay), ref = sit_ref)UCSF	0.031	0.503	0.061	0.951	1
BRAF	Cancer of Unknown Primary	relevel(factor(sample_assay), ref = sit_ref)VICC	0.548	0.508	1.08	0.28	1
BRAF	Cancer of Unknown Primary	factor(sample_subtypes)Cancer of Unknown Primary	0.286	0.242	1.181	0.237	1
BRAF	Cancer of Unknown Primary	factor(sample_subtypes)Cancer of Unknown Primary, NOS	0.268	0.336	0.799	0.424	1
BRAF	Cancer of Unknown Primary	factor(sample_subtypes)Neuroendocrine Carcinoma, NOS	-2.219	1.019	-2.177	0.0294	0.53
BRAF	Cancer of Unknown Primary	factor(sample_subtypes)Neuroendocrine Tumor, NOS	-1.88	0.731	-2.571	0.0101	0.289
BRAF	Cancer of Unknown Primary	factor(sample_subtypes)others	0.571	1.096	0.521	0.602	1
BRAF	Cancer of Unknown Primary	factor(sample_subtypes)Poorly Differentiated Carcinoma, NOS	-0.292	0.354	-0.826	0.409	1
BRAF	Cancer of Unknown Primary	factor(sample_subtypes)Small Cell Carcinoma of Unknown Primary	-1.115	1.027	-1.086	0.277	1
BRAF	Cancer of Unknown Primary	factor(sample_subtypes)Squamous Cell Carcinoma, NOS	-0.563	0.423	-1.333	0.182	1
BRAF	Cancer of Unknown Primary	factor(sample_subtypes)Undifferentiated Malignant Neoplasm	-0.018	0.514	-0.034	0.972	1
BRAF	Cancer of Unknown Primary	factor(sample_all$sex)Male	0.118	0.185	0.64	0.522	1
BRAF	Cancer of Unknown Primary	factor(sample_all$sex)Unknown	-14	2399.55	-0.006	0.995	1
BRAF	Cancer of Unknown Primary	factor(sample_status)1	0.009	0.245	0.037	0.97	1
BRAF	Esophagogastric Cancer	factor(aya_status)1	-1.291	1.022	-1.264	0.206	1
BRAF	Esophagogastric Cancer	relevel(factor(sample_assay), ref = sit_ref)COLU	-14.782	2660.04	-0.006	0.996	1
BRAF	Esophagogastric Cancer	relevel(factor(sample_assay), ref = sit_ref)DFCI	0.006	0.311	0.019	0.985	1
BRAF	Esophagogastric Cancer	relevel(factor(sample_assay), ref = sit_ref)DUKE	0.053	1.035	0.051	0.959	1
BRAF	Esophagogastric Cancer	relevel(factor(sample_assay), ref = sit_ref)PHS	-14.895	1478.8	-0.01	0.992	1
BRAF	Esophagogastric Cancer	relevel(factor(sample_assay), ref = sit_ref)UCHI	-15.814	6522.64	-0.002	0.998	1
BRAF	Esophagogastric Cancer	relevel(factor(sample_assay), ref = sit_ref)UCSF	-0.128	1.04	-0.124	0.902	1
BRAF	Esophagogastric Cancer	relevel(factor(sample_assay), ref = sit_ref)VICC	-0.03	0.77	-0.039	0.969	1
BRAF	Esophagogastric Cancer	factor(sample_subtypes)Diffuse Type Stomach Adenocarcinoma	-14.689	1227.38	-0.012	0.99	1
BRAF	Esophagogastric Cancer	factor(sample_subtypes)Esophageal Adenocarcinoma	-0.229	0.478	-0.478	0.632	1
BRAF	Esophagogastric Cancer	factor(sample_subtypes)Esophageal Poorly Differentiated Carcinoma	0.916	0.823	1.113	0.266	1
BRAF	Esophagogastric Cancer	factor(sample_subtypes)Esophageal Squamous Cell Carcinoma	0.264	0.643	0.41	0.682	1
BRAF	Esophagogastric Cancer	factor(sample_subtypes)Esophagogastric Adenocarcinoma	-0.053	0.648	-0.082	0.935	1
BRAF	Esophagogastric Cancer	factor(sample_subtypes)Intestinal Type Stomach Adenocarcinoma	0.564	1.092	0.517	0.605	1
BRAF	Esophagogastric Cancer	factor(sample_subtypes)others	0.916	1.101	0.832	0.405	1
BRAF	Esophagogastric Cancer	factor(sample_subtypes)Poorly Differentiated Carcinoma of the Stomach	1.073	0.616	1.742	0.0815	0.874
[truncated: 131,123 more rows]

## Sheet: model_race
Gene	Cancer Type	Variable	Estimate	Std..Error	z.value	P value	FDR
[truncated: 137,392 more rows]

[truncated: 1 more sheets: model_primary]
