# Supplementary material for: Genomic disparities between cancers in adolescent and young adults and in older adults
Source: Nat Commun. 2022 Nov 24;13:7223. doi: 10.1038/s41467-022-34959-2 (PMC9700745; doi:10.1038/s41467-022-34959-2)
Supplement: Supplementary file 8 — Supplementary Data 5 [file 41467_2022_34959_MOESM8_ESM.xlsx]

## Sheet: TERTp
Cancer type	Mut AYA count	wt AYA count	Mut OA count	wt OA count	p	FDR	AYA_mutation_rate	OA_mutation_rate	Higher_in_AYA
Glioma	118	397	1283	560	1.92128e-81	2.88191e-80	0.229126	0.696148	0
Thyroid Cancer	8	105	430	377	5.48872e-23	4.11654e-22	0.0707965	0.532838	0
Renal Cell Carcinoma	1	105	94	979	0.00213324	0.0106662	0.00943396	0.0876048	0
Head and Neck Cancer	20	30	166	624	0.00418322	0.0156871	0.4	0.210127	1
Ovarian Cancer	7	99	43	1872	0.0138035	0.0414106	0.0660377	0.0224543	1
Breast Cancer	0	727	35	6222	0.045662	0.114155	0	0.00559374	0
Soft Tissue Sarcoma	24	420	110	1251	0.0757065	0.162228	0.0540541	0.0808229	0
Bone Cancer	7	162	16	184	0.136978	0.256833	0.0414201	0.08	0
Hepatobiliary Cancer	9	90	185	1190	0.280069	0.466781	0.0909091	0.134545	0
Non-Small Cell Lung Cancer	1	135	151	7802	0.523141	0.784712	0.00735294	0.0189865	0
Colorectal Cancer	7	525	57	4829	0.674647	0.919973	0.0131579	0.011666	1
Melanoma	80	87	880	1015	0.746453	0.933067	0.479042	0.46438	1
Cancer of Unknown Primary	6	83	124	1533	1	1	0.0674157	0.074834	0
Cervical Cancer	4	72	17	244	1	1	0.0526316	0.0651341	0
Pancreatic Cancer	0	85	11	2714	1	1	0	0.0040367	0
