# Supplementary material for: Genomic disparities between cancers in adolescent and young adults and in older adults
Source: Nat Commun. 2022 Nov 24;13:7223. doi: 10.1038/s41467-022-34959-2 (PMC9700745; doi:10.1038/s41467-022-34959-2)
Supplement: Supplementary file 9 — Supplementary Data 6 [file 41467_2022_34959_MOESM9_ESM.xlsx]

## Sheet: GI
	AYA_median	OA_median	p-value	FDR
Ovarian Cancer	0.10216	0.396058	3.94e-13	6.304e-12
Esophagogastric Cancer	0.0479745	0.139934	7.82e-06	6.256e-05
Thyroid Cancer	0.0054762	0.0808686	7.35e-05	0.000392
Colorectal Cancer	0.156421	0.198339	0.000257	0.001028
Soft Tissue Sarcoma	0.154954	0.182769	0.00261	0.00696
Glioma	0.189063	0.211707	0.00252	0.00696
Cervical Cancer	0.0799183	0.170523	0.00355	0.00811429
Breast Cancer	0.262202	0.232482	0.00578	0.01156
Germ Cell Tumor	0.173829	0.235722	0.00817	0.0145244
Pancreatic Cancer	0.102334	0.0635101	0.0368	0.05888
Bone Cancer	0.133712	0.219999	0.128	0.186182
Non-Small Cell Lung Cancer	0.149677	0.101781	0.14	0.186667
Cancer of Unknown Primary	0.159551	0.204467	0.217	0.267077
Melanoma	0.212423	0.224075	0.437	0.499429
Hepatobiliary Cancer	0.115959	0.113556	0.933	0.957
Renal Cell Carcinoma	0.117432	0.118236	0.957	0.957

## Sheet: can_gene
			Logistic model results							Fisher's test results
Gene	Cancer type	Change_type	Factors	Estimate	Std..Error	z.value	p value	FDR	insight	#AYA_cna	#AYA_wt	#OA_cna	#OA_wt	p	FDR	AYA_rate	OA_rate	Higher_AYA
CCND1	Esophagogastric Cancer	amp	factor(aya_status)1	-2.04726	1.01323	-2.02052	0.0433291	1	histological subtype	1	139	187	2151	0.000233912	0.0246046	0.00714286	0.0799829	0
CCNE1	Ovarian Cancer	amp	factor(aya_status)1	-0.250142	0.618937	-0.404148	0.686104	1	undetermined	3	141	283	2445	0.000290584	0.0285527	0.0208333	0.103739	0
CDK4	Glioma	amp	factor(aya_status)1	-0.35547	0.192439	-1.84718	0.0647211	1	undetermined	36	779	311	2673	2.07406e-08	6.34663e-06	0.0441718	0.104223	0
CDK4	Soft Tissue Sarcoma	amp	factor(aya_status)1	-0.467378	0.322145	-1.45083	0.146827	1	histological subtype	27	527	351	1445	1.61361e-19	1.08628e-16	0.0487365	0.195434	0
EGFR	Glioma	amp	factor(aya_status)1	-1.78317	0.205859	-8.66209	4.63206e-18	3.38712e-14	aya, histological subtype	27	788	852	2132	1.46685e-67	4.93742e-64	0.0331288	0.285523	0
MDM2	Glioma	amp	factor(aya_status)1	-1.66917	0.462697	-3.60748	0.000309182	0.057479	undetermined	5	810	173	2811	3.83735e-13	1.84522e-10	0.00613497	0.0579759	0
MDM2	Soft Tissue Sarcoma	amp	factor(aya_status)1	-0.666622	0.327012	-2.03852	0.0414977	1	histological subtype	29	525	381	1415	2.43871e-21	2.05217e-18	0.0523466	0.212138	0
MDM4	Glioma	amp	factor(aya_status)1	-3.21841	1.00929	-3.18877	0.00142877	0.170342	undetermined	1	814	143	2841	2.62205e-14	1.47097e-11	0.00122699	0.0479223	0
PDGFRA	Glioma	amp	factor(aya_status)1	-0.169866	0.203565	-0.834455	0.404024	1	undetermined	33	782	223	2761	0.000365978	0.03351	0.0404908	0.0747319	0
PIK3C2B	Glioma	amp	factor(aya_status)1	-2.30906	1.01564	-2.27351	0.0229952	0.899517	undetermined	1	434	69	1455	5.32258e-07	0.000111974	0.00229885	0.0452756	0
SETD1A	Breast Cancer	amp	factor(aya_status)1	-15.9362	552.987	-0.0288184	0.977009	1	undetermined	0	139	127	1759	0.000172105	0.019976	0	0.0673383	0
CDKN2A	Glioma	del	factor(aya_status)1	-0.796119	0.118007	-6.74638	1.5158e-11	3.69467e-08	aya, histological subtype	113	702	1229	1755	9.42902e-53	1.5869e-49	0.13865	0.411863	0
CDKN2A	Soft Tissue Sarcoma	del	factor(aya_status)1	-0.49094	0.228665	-2.14699	0.0317944	1	undetermined	26	527	176	1606	8.77676e-05	0.0113625	0.0470163	0.0987654	0
CDKN2B	Gastrointestinal Stromal Tumor	del	factor(aya_status)1	-2.22089	0.730389	-3.04069	0.00236034	0.235358	metastasis	2	63	152	546	6.83668e-05	0.00947428	0.0307692	0.217765	0
CDKN2B	Glioma	del	factor(aya_status)1	-0.718309	0.118814	-6.04566	1.48796e-09	1.97827e-06	aya, histological subtype	111	704	1173	1811	7.30342e-48	8.19444e-45	0.136196	0.393097	0
CDKN2B	Soft Tissue Sarcoma	del	factor(aya_status)1	-0.531259	0.240527	-2.20873	0.0271932	0.977929	undetermined	23	530	164	1618	7.03675e-05	0.00947428	0.0415913	0.0920314	0
ERRFI1	Glioma	del	factor(aya_status)1	-17.0661	1335.89	-0.0127751	0.989807	1	undetermined	0	403	41	1485	0.000113996	0.013704	0	0.0268676	0
GATA3	Glioma	del	factor(aya_status)1	-1.0426	0.477181	-2.18492	0.0288949	1	undetermined	5	810	94	2890	8.92176e-06	0.00136503	0.00613497	0.0315013	0
MTAP	Glioma	del	factor(aya_status)1	-0.554575	0.24166	-2.29486	0.0217413	0.87915	histological subtype	23	406	244	1257	5.92729e-10	2.21681e-07	0.0536131	0.162558	0
PTEN	Glioma	del	factor(aya_status)1	-0.572015	0.322971	-1.7711	0.0765436	1	histological subtype	11	804	167	2817	1.85441e-08	6.24194e-06	0.0134969	0.0559651	0
RB1	Soft Tissue Sarcoma	del	factor(aya_status)1	-0.82196	0.348271	-2.36012	0.0182691	0.817065	undetermined	10	543	127	1655	4.09098e-07	9.18015e-05	0.0180832	0.0712682	0
RET	Glioma	del	factor(aya_status)1	-1.05906	0.476428	-2.22291	0.0262218	0.960127	undetermined	5	810	92	2892	1.32471e-05	0.00193868	0.00613497	0.0308311	0
BRIP1	Breast Cancer	amp	factor(aya_status)1	0.364496	0.127794	2.85221	0.0043416	0.346965	undetermined	78	966	460	9116	0.000446272	0.0375538	0.0747126	0.0480368	1
CCND2	Glioma	amp	factor(aya_status)1	1.1467	0.289104	3.96638	7.29728e-05	0.0175913	aya	24	791	36	2948	0.0011987	0.0850496	0.0294479	0.0120643	1
CCNE1	Esophagogastric Cancer	amp	factor(aya_status)1	1.16456	0.261241	4.45782	8.27983e-06	0.00307855	aya	21	119	137	2201	0.00021102	0.0229127	0.15	0.0585971	1
CD79B	Breast Cancer	amp	factor(aya_status)1	0.693308	0.149083	4.6505	3.31129e-06	0.00146747	aya	61	844	245	7445	5.91431e-07	0.000117103	0.0674033	0.0318596	1
CDK12	Breast Cancer	amp	factor(aya_status)1	0.598028	0.114075	5.24241	1.58496e-07	9.9776e-05	aya	107	798	501	7189	4.55098e-08	1.27655e-05	0.118232	0.0651495	1
EPCAM	Non-Small Cell Lung Cancer	amp	factor(aya_status)1	3.49763	0.861786	4.05859	4.93707e-05	0.0127417	aya	2	152	6	9876	0.00616485	0.26267	0.012987	0.000607165	1
ERBB2	Breast Cancer	amp	factor(aya_status)1	0.536126	0.0848118	6.32137	2.59259e-10	3.79158e-07	aya	205	839	1119	8520	2.1045e-12	8.85469e-10	0.19636	0.116091	1
ERCC5	Glioma	amp	factor(aya_status)1	3.38033	0.827914	4.08295	4.44675e-05	0.0116824	aya	7	755	2	2883	0.000410487	0.0363605	0.00918635	0.000693241	1
HOXB13	Breast Cancer	amp	factor(aya_status)1	0.959987	0.206115	4.65753	3.20029e-06	0.00144752	aya	33	826	99	7060	2.45157e-06	0.000458444	0.0384168	0.0138287	1
KDM5A	Glioma	amp	factor(aya_status)1	1.66575	0.511893	3.25409	0.00113755	0.146293	undetermined	12	803	7	2977	9.84157e-05	0.0122692	0.0147239	0.00234584	1
KLRG1	Breast Cancer	amp	factor(aya_status)1	1.73851	0.36045	4.82315	1.41307e-06	0.000688854	aya	12	127	27	1859	5.36079e-06	0.000859257	0.0863309	0.014316	1
MSH2	Non-Small Cell Lung Cancer	amp	factor(aya_status)1	3.08892	0.817228	3.77975	0.000156985	0.0328044	aya	2	163	8	10425	0.00998788	0.369212	0.0121212	0.000766798	1
MSH6	Non-Small Cell Lung Cancer	amp	factor(aya_status)1	3.26137	0.83534	3.90424	9.45225e-05	0.0219422	aya	2	163	7	10426	0.00807238	0.323472	0.0121212	0.000670948	1
NFKBIA	Breast Cancer	amp	factor(aya_status)1	1.01791	0.285574	3.56444	0.000364637	0.0653388	undetermined	17	888	50	7640	0.00042923	0.0370458	0.0187845	0.00650195	1
NKX2-1	Breast Cancer	amp	factor(aya_status)1	1.17602	0.322712	3.64417	0.000268256	0.0514663	undetermined	14	891	34	7719	0.000269741	0.0275136	0.0154696	0.0043854	1
PPM1D	Breast Cancer	amp	factor(aya_status)1	0.667946	0.131547	5.0776	3.82226e-07	0.000220655	aya, histological subtype	80	779	329	6830	6.22972e-08	1.61302e-05	0.0931315	0.0459561	1
PRKAR1A	Breast Cancer	amp	factor(aya_status)1	0.691315	0.16108	4.29176	1.77259e-05	0.00551566	aya	52	853	206	7484	3.99e-06	0.000671516	0.0574586	0.026788	1
RAD52	Glioma	amp	factor(aya_status)1	1.41891	0.498734	2.84503	0.00444079	0.352517	undetermined	11	798	7	2954	0.000296894	0.0285527	0.013597	0.00236407	1
RPS6KB2	Bladder Cancer	amp	factor(aya_status)1	3.2874	0.738916	4.44895	8.62899e-06	0.00318142	aya	3	24	7	1481	0.000558089	0.0458178	0.111111	0.0047043	1
RTEL1	Breast Cancer	amp	factor(aya_status)1	0.687954	0.192505	3.5737	0.000351973	0.0640767	undetermined	36	582	151	5088	0.000368351	0.03351	0.0582524	0.0288223	1
SPOP	Breast Cancer	amp	factor(aya_status)1	0.689303	0.159086	4.33291	1.47153e-05	0.00478235	aya	53	852	210	7480	2.97104e-06	0.000526343	0.0585635	0.0273082	1
ATRX	Glioma	del	factor(aya_status)1	1.75643	0.612256	2.86878	0.00412058	0.340284	undetermined	10	805	5	2979	0.00020389	0.0228764	0.0122699	0.0016756	1
SMARCB1	Soft Tissue Sarcoma	del	factor(aya_status)1	1.68377	0.448821	3.75153	0.000175757	0.0360334	aya	19	534	7	1775	1.196e-07	2.87552e-05	0.034358	0.00392817	1
TGFBR2	Cancer of Unknown Primary	del	factor(aya_status)1	2.44228	0.665374	3.67053	0.000242049	0.0471985	aya	4	70	9	1343	0.00334591	0.191441	0.0540541	0.0066568	1
