# Supplementary material for: Genomic disparities between cancers in adolescent and young adults and in older adults
Source: Nat Commun. 2022 Nov 24;13:7223. doi: 10.1038/s41467-022-34959-2 (PMC9700745; doi:10.1038/s41467-022-34959-2)
Supplement: Supplementary file 10 — Supplementary Data 7 [file 41467_2022_34959_MOESM10_ESM.xlsx]

## Sheet: Recurrent fusions
Cancer	Fusion	AYA fusion positive	AYA fusion negative	OA fusion positive	OA fusion negative	AYA_ratio	OA_ratio	p	FDR	Higher_in_AYA
Glioma	EGFR-intragenic	5	243	176	769	0.0201613	0.186243	6.55195e-14	3.07942e-12	0
Soft Tissue Sarcoma	WT1-EWSR1 fusion	25	248	3	791	0.0915751	0.00377834	1.01715e-12	2.39031e-11	1
Hepatobiliary Cancer	DNAJB1-PRKACA fusion	8	41	0	692	0.163265	0	2.07777e-10	3.25517e-09	1
Non-Small Cell Lung Cancer	EML4-ALK fusion	10	51	68	4357	0.163934	0.0153672	6.19068e-08	7.27405e-07	1
Thyroid Cancer	RET-NCOA4 fusion	5	56	0	412	0.0819672	0	3.07993e-05	0.000289514	1
Soft Tissue Sarcoma	ATF1-EWSR1 fusion	8	265	5	789	0.029304	0.00629723	0.00627137	0.0491257	1
Glioma	BRAF-KIAA1549 fusion	4	244	2	943	0.016129	0.0021164	0.0192239	0.129075	1
Bone Cancer	FLI1-EWSR1 fusion	19	76	10	105	0.2	0.0869565	0.0260058	0.133238	1
Renal Cell Carcinoma	ASPSCR1-TFE3 fusion	2	45	1	415	0.0425532	0.00240385	0.0283485	0.133238	1
Soft Tissue Sarcoma	STAT6-NAB2 fusion	1	272	20	774	0.003663	0.0251889	0.0230278	0.133238	0
Glioma	FGFR3-TACC3 fusion	0	248	16	929	0	0.0169312	0.0549221	0.234667	0
Thyroid Cancer	CCDC6-RET fusion	3	58	5	407	0.0491803	0.0121359	0.0711495	0.278669	1
Glioma	SEPT14-EGFR fusion	0	248	13	932	0	0.0137566	0.082522	0.298349	0
Glioma	TACC3-FGFR3 fusion	0	248	12	933	0	0.0126984	0.142584	0.478674	0
Cervical Cancer	STK11-intragenic	2	54	1	163	0.0357143	0.00609756	0.160111	0.50168	1
Nerve Sheath Tumor	TP53BP1-intragenic	2	32	0	36	0.0588235	0	0.232298	0.682376	1
Bone Cancer	FLI1-EWSR1 fusion - Archer	3	92	1	114	0.0315789	0.00869565	0.330392	0.787192	1
Nerve Sheath Tumor	AKT2-intragenic	1	33	0	36	0.0294118	0	0.485714	0.787192	1
Nerve Sheath Tumor	CBL-intragenic	1	33	0	36	0.0294118	0	0.485714	0.787192	1
Nerve Sheath Tumor	DOT1L-intragenic	1	33	0	36	0.0294118	0	0.485714	0.787192	1
Nerve Sheath Tumor	EGFR-VPS41 fusion	1	33	0	36	0.0294118	0	0.485714	0.787192	1
Nerve Sheath Tumor	FAT1-NAF1 fusion	1	33	0	36	0.0294118	0	0.485714	0.787192	1
Nerve Sheath Tumor	HIVEP3-CRKL fusion	1	33	0	36	0.0294118	0	0.485714	0.787192	1
Nerve Sheath Tumor	NF2-KREMEN1 fusion	1	33	0	36	0.0294118	0	0.485714	0.787192	1
Nerve Sheath Tumor	PAICS-KDR fusion	1	33	0	36	0.0294118	0	0.485714	0.787192	1
Nerve Sheath Tumor	PRKG1-intragenic	1	33	0	36	0.0294118	0	0.485714	0.787192	1
Nerve Sheath Tumor	RAB4A-CDKN2A fusion	1	33	0	36	0.0294118	0	0.485714	0.787192	1
Nerve Sheath Tumor	SLC16A4-GATA3 fusion	1	33	0	36	0.0294118	0	0.485714	0.787192	1
Nerve Sheath Tumor	SNTB1-LYN fusion	1	33	0	36	0.0294118	0	0.485714	0.787192	1
Ovarian Cancer	NF1-intragenic	1	54	19	1206	0.0181818	0.0155102	0.587335	0.889818	1
Salivary Gland Cancer	ETV6-NTRK3 fusion	0	22	10	167	0	0.0564972	0.605833	0.889818	0
Salivary Gland Cancer	NFIB-MYB fusion - Archer	0	22	10	167	0	0.0564972	0.605833	0.889818	0
Bone Cancer	ERG-EWSR1 fusion	1	94	1	114	0.0105263	0.00869565	1	1	1
Hepatobiliary Cancer	FGFR2-BICC1 fusion	0	49	10	682	0	0.0144509	1	1	0
Nerve Sheath Tumor	EGFR-intragenic	1	33	1	35	0.0294118	0.0277778	1	1	1
Nerve Sheath Tumor	NF2-intragenic	1	33	1	35	0.0294118	0.0277778	1	1	1
Nerve Sheath Tumor	ALK-EML4 fusion	0	34	1	35	0	0.0277778	1	1	0
Nerve Sheath Tumor	ARID1A-intragenic	0	34	1	35	0	0.0277778	1	1	0
Nerve Sheath Tumor	BCOR-CREBRF fusion - Archer	0	34	1	35	0	0.0277778	1	1	0
Nerve Sheath Tumor	EED-intragenic	0	34	0	36	0	0	1	1	0
Nerve Sheath Tumor	FAT1-intragenic	0	34	1	35	0	0.0277778	1	1	0
Nerve Sheath Tumor	KDM5C-NUDT11 fusion	0	34	1	35	0	0.0277778	1	1	0
Nerve Sheath Tumor	SYNE1-KMT2D fusion	0	34	1	35	0	0.0277778	1	1	0
Non-Small Cell Lung Cancer	RET-KIF5B fusion	0	61	53	4372	0	0.0119774	1	1	0
Salivary Gland Cancer	STAT5B-CDK12 fusion	0	22	4	173	0	0.0225989	1	1	0
Soft Tissue Sarcoma	DDIT3-FUS fusion - Archer	3	270	8	786	0.010989	0.0100756	1	1	1
Thyroid Cancer	RET-CCDC6 fusion	1	60	8	404	0.0163934	0.0194175	1	1	0

## Sheet: Recurrent fusion genes
Cancer	Gene	#AYA_gene1	#AYA_gene2	#AYA_either	#AYA_no_gene	#OA_gene1	#OA_gene2	#OA_either	#OA_no_gene	AYA_ratio	OA_ratio	p	FDR	Higher_AYA
Non-Small Cell Lung Cancer	ALK	11	12	21	40	59	73	127	4298	0.344262	0.0287006	7.34278e-17	1.17484e-15	1
Soft Tissue Sarcoma	EWSR1	2	46	47	226	1	15	16	778	0.172161	0.0201511	4.45004e-17	1.17484e-15	1
Glioma	EGFR	5	0	5	243	185	19	195	750	0.0201613	0.206349	5.32027e-16	5.67495e-15	0
Non-Small Cell Lung Cancer	EML4	10	9	19	42	68	44	111	4314	0.311475	0.0250847	1.70341e-15	1.36272e-14	1
Hepatobiliary Cancer	DNAJB1	8	5	13	36	0	2	2	690	0.265306	0.00289017	8.55552e-15	4.56294e-14	1
Hepatobiliary Cancer	PRKACA	5	8	13	36	2	0	2	690	0.265306	0.00289017	8.55552e-15	4.56294e-14	1
Soft Tissue Sarcoma	WT1	25	0	25	248	5	1	6	788	0.0915751	0.00755668	1.04663e-10	4.78461e-10	1
Glioma	BRAF	8	3	9	239	4	0	4	941	0.0362903	0.0042328	0.000207287	0.000829148	1
Thyroid Cancer	RET	8	4	11	50	10	8	18	394	0.180328	0.0436893	0.000366279	0.00130232	1
Soft Tissue Sarcoma	NAB2	0	1	1	272	6	27	33	761	0.003663	0.0415617	0.00095696	0.00306227	0
Glioma	TACC3	0	0	0	248	13	16	28	917	0	0.0296296	0.00182711	0.00531522	0
Bone Cancer	FLI1	21	1	22	73	11	0	11	104	0.231579	0.0956522	0.0079626	0.0212336	1
Glioma	FGFR3	1	1	1	247	17	13	29	916	0.00403226	0.0306878	0.0115705	0.0284813	0
Soft Tissue Sarcoma	STAT6	1	0	1	272	23	0	23	771	0.003663	0.0289673	0.0152902	0.0349489	0
Renal Cell Carcinoma	TFE3	1	3	4	43	5	2	7	409	0.0851064	0.0168269	0.0181053	0.0386246	1
Bone Cancer	EWSR1	3	24	25	70	0	15	15	100	0.263158	0.130435	0.0210445	0.042089	1
Hepatobiliary Cancer	FGFR2	2	5	6	43	18	21	32	660	0.122449	0.0462428	0.0331059	0.0623169	1
Thyroid Cancer	CCDC6	3	3	5	56	5	8	13	399	0.0819672	0.0315534	0.0683712	0.121549	1
Salivary Gland Cancer	EWSR1	0	2	2	20	0	3	3	174	0.0909091	0.0169492	0.0951335	0.155393	1
Thyroid Cancer	NTRK1	2	1	3	58	6	1	6	406	0.0491803	0.0145631	0.0971209	0.155393	1
Nerve Sheath Tumor	TP53BP1	2	0	2	32	0	0	0	36	0.0588235	0	0.232298	0.353978	1
Non-Small Cell Lung Cancer	RET	0	2	2	59	79	19	92	4333	0.0327869	0.020791	0.367109	0.497358	1
Salivary Gland Cancer	ETV6	0	0	0	22	12	3	14	163	0	0.079096	0.373018	0.497358	0
Salivary Gland Cancer	NTRK3	0	0	0	22	3	10	12	165	0	0.0677966	0.368215	0.497358	0
Bone Cancer	TP53	0	1	1	94	2	1	3	112	0.0105263	0.026087	0.628288	0.718044	0
Nerve Sheath Tumor	EGFR	2	0	2	32	1	0	1	35	0.0588235	0.0277778	0.608696	0.718044	1
Salivary Gland Cancer	MYB	0	0	0	22	1	10	11	166	0	0.0621469	0.614593	0.718044	0
Salivary Gland Cancer	NFIB	0	0	0	22	11	0	11	166	0	0.0621469	0.614593	0.718044	0
Bone Cancer	ERG	1	0	1	94	1	0	1	114	0.0105263	0.00869565	1	1	1
Melanoma	BRAF	2	0	2	76	21	5	23	918	0.025641	0.0244421	1	1	1
Nerve Sheath Tumor	FAT1	1	0	1	33	1	0	1	35	0.0294118	0.0277778	1	1	1
Nerve Sheath Tumor	NF2	1	0	1	33	1	0	1	35	0.0294118	0.0277778	1	1	1
