# Supplementary material for: Genomic disparities between cancers in adolescent and young adults and in older adults
Source: Nat Commun. 2022 Nov 24;13:7223. doi: 10.1038/s41467-022-34959-2 (PMC9700745; doi:10.1038/s41467-022-34959-2)
Supplement: Supplementary file 11 — Supplementary Data 8 [file 41467_2022_34959_MOESM11_ESM.xlsx]

## Sheet: Hypermutator Count
Cancer Type	AYA hypermutator count	total AYA considered	OA hypermutator count	Total OA considered	p-value	FDR
Colorectal Cancer	116	688	636	6205	5.97605e-07	9.56167e-06
Melanoma	45	215	879	2412	3.22628e-06	2.58102e-05
Non-Small Cell Lung Cancer	3	165	1221	10434	5.95462e-06	3.1758e-05
Soft Tissue Sarcoma	7	569	51	1764	0.0290886	0.116354
Cancer of Unknown Primary	10	138	282	2283	0.0798117	0.212831
Glioma	54	1035	137	3506	0.077455	0.212831
Hepatobiliary Cancer	6	111	39	1544	0.117996	0.269706
Thyroid Cancer	0	195	15	1035	0.14794	0.295881
Esophagogastric Cancer	4	136	139	2307	0.185116	0.329095
Ovarian Cancer	4	148	50	2825	0.342579	0.52509
Breast Cancer	23	914	243	7754	0.360999	0.52509
Pancreatic Cancer	2	103	44	3369	0.398594	0.531459
Renal Cell Carcinoma	0	132	12	1374	0.615087	0.757031
Cervical Cancer	4	104	16	333	0.794413	0.907901
Germ Cell Tumor	4	442	2	244	1	1
Bone Cancer	1	200	1	235	1	1

## Sheet: hypermutation_type_comp
Mutation Signature	AYA with signature	AYA without signature	OA with signature	OA without signature	AYA_fraction	OA_fraction	p	FDR
MMR	170	144	1930	3298	0.541401	0.369166	2.23e-09	1.561e-08
Smoking/Tobacco	23	291	944	4284	0.0732484	0.180566	1.44e-07	5.04e-07
UV	38	276	1100	4128	0.121019	0.210406	7.13e-05	0.000166367
APOBEC	25	289	808	4420	0.0796178	0.154552	0.000167	0.00029225
TMZ	27	287	212	5016	0.0859873	0.0405509	0.000481	0.0006734
POLE	19	295	141	5087	0.0605096	0.0269702	0.00245	0.00285833
BRCA1/2	12	302	93	5135	0.0382166	0.0177888	0.0171	0.0171
