# Supplementary material for: Genomic disparities between cancers in adolescent and young adults and in older adults
Source: Nat Commun. 2022 Nov 24;13:7223. doi: 10.1038/s41467-022-34959-2 (PMC9700745; doi:10.1038/s41467-022-34959-2)
Supplement: Supplementary file 12 — Supplementary Data 9 [file 41467_2022_34959_MOESM12_ESM.xlsx]

## Sheet: Sheet1
Model description
Model name	model formula	comments
mskmet_model1	mutation status ~ AYA status + histological subtype + metastasis + sex	mskmet samples
mskmet_model2	mutation status ~ AYA status + histological subtype + tumor stage + sex	mskmet samples

## Sheet: mskmet_model1
Gene	Cancer Type	Variable	Estimate	Std..Error	z.value	P value	FDR
PIK3CA	Breast Cancer	factor(aya_status)1	-0.803201	0.14773	-5.43694	5.42019e-08	5.11666e-05
TP53	Ovarian Cancer	factor(sample_subtypes)High-Grade Serous Ovarian Cancer	4.57714	0.330623	13.844	1.38255e-43	1.76311e-39
ARID1A	Ovarian Cancer	factor(sample_subtypes)High-Grade Serous Ovarian Cancer	-3.96625	0.286552	-13.8413	1.4367e-43	1.76311e-39
ESR1	Breast Cancer	factor(sample_status)1	2.1318	0.179417	11.8818	1.47096e-32	1.20344e-28
PIK3CA	Ovarian Cancer	factor(sample_subtypes)High-Grade Serous Ovarian Cancer	-2.98453	0.264656	-11.277	1.70432e-29	1.04577e-25
TP53	Non-Small Cell Lung Cancer	factor(sample_status)1	0.538137	0.0577092	9.32497	1.11019e-20	5.44968e-17
CTNNB1	Endometrial Cancer	factor(aya_status)1	2.58751	0.482526	5.36243	8.2112e-08	6.71786e-05
SF3B1	Melanoma	factor(sample_subtypes)Cutaneous Melanoma	-2.60336	0.286994	-9.07111	1.17812e-19	4.81929e-16
STK11	Non-Small Cell Lung Cancer	factor(sample_subtypes)Lung Squamous Cell Carcinoma	-3.46243	0.388215	-8.91886	4.71129e-19	1.65191e-15
KEAP1	Non-Small Cell Lung Cancer	factor(sample_all$sex)Male	0.593428	0.0819149	7.24445	4.34213e-13	1.33216e-09
TP53	Soft Tissue Sarcoma	factor(sample_subtypes)Leiomyosarcoma	3.19644	0.45892	6.96514	3.2808e-12	8.0524e-09
TP53	Soft Tissue Sarcoma	factor(sample_subtypes)Undifferentiated Pleomorphic Sarcoma/Malignant Fibrous Histiocytoma/High-Grade Spindle Cell Sarcoma	3.10875	0.445682	6.97526	3.05304e-12	8.0524e-09
RB1	Non-Small Cell Lung Cancer	factor(sample_subtypes)Lung Adenocarcinoma	-1.73766	0.260013	-6.68297	2.3414e-11	5.2243e-08
HRAS	Bladder Cancer	factor(sample_subtypes)Upper Tract Urothelial Carcinoma	1.83153	0.278782	6.56975	5.03996e-11	1.03084e-07
KRAS	Pancreatic Cancer	factor(aya_status)1	-1.93131	0.362201	-5.33215	9.70557e-08	7.6843e-05
KMT2D	Colorectal Cancer	factor(sample_status)1	-0.913146	0.140053	-6.51999	7.03132e-11	1.32751e-07
ATRX	Non-Small Cell Lung Cancer	factor(sample_all$sex)Male	-1.01278	0.156449	-6.47352	9.57458e-11	1.67856e-07
SPOP	Ovarian Cancer	factor(sample_subtypes)High-Grade Serous Ovarian Cancer	-4.21438	0.659717	-6.38816	1.67893e-10	2.74717e-07
EGFR	Non-Small Cell Lung Cancer	factor(sample_all$sex)Male	-0.407969	0.0649872	-6.27768	3.4367e-10	5.27189e-07
MED12	Non-Small Cell Lung Cancer	factor(sample_all$sex)Male	-0.947434	0.155255	-6.10242	1.04473e-09	1.50835e-06
KRAS	Non-Small Cell Lung Cancer	factor(sample_subtypes)Lung Squamous Cell Carcinoma	-2.02643	0.341348	-5.93654	2.91102e-09	3.95723e-06
SF3B1	Melanoma	factor(sample_subtypes)Melanoma of Unknown Primary	-2.35293	0.396907	-5.92817	3.06337e-09	3.95723e-06
KRAS	Non-Small Cell Lung Cancer	factor(sample_status)1	-0.378858	0.0642122	-5.90009	3.63297e-09	4.45839e-06
KRAS	Non-Small Cell Lung Cancer	factor(aya_status)1	-1.98536	0.462428	-4.29334	1.76004e-05	0.00438221
BRAF	Colorectal Cancer	factor(sample_subtypes)Rectal Adenocarcinoma	-0.997738	0.170801	-5.84152	5.17276e-09	6.04572e-06
KRAS	Ovarian Cancer	factor(sample_subtypes)High-Grade Serous Ovarian Cancer	-2.52939	0.45171	-5.59959	2.14854e-08	2.39699e-05
KRAS	Hepatobiliary Cancer	factor(sample_subtypes)Intrahepatic Cholangiocarcinoma	-1.41417	0.254032	-5.56689	2.59331e-08	2.70771e-05
B2M	Colorectal Cancer	factor(sample_status)1	-1.49097	0.268003	-5.56327	2.6477e-08	2.70771e-05
RNF43	Colorectal Cancer	factor(sample_status)1	-0.825651	0.148728	-5.55142	2.83355e-08	2.78187e-05
KIT	Melanoma	factor(sample_subtypes)Cutaneous Melanoma	-1.73056	0.321113	-5.38924	7.07559e-08	6.08455e-05
ARID1A	Colorectal Cancer	factor(sample_status)1	-0.720937	0.133558	-5.39793	6.74124e-08	6.08455e-05
TP53	Pancreatic Cancer	factor(aya_status)1	-1.35329	0.321083	-4.21478	2.50024e-05	0.00564076
PIK3R1	Ovarian Cancer	factor(sample_subtypes)High-Grade Serous Ovarian Cancer	-2.71155	0.503408	-5.38638	7.18921e-08	6.08455e-05
ATRX	Colorectal Cancer	factor(sample_all$sex)Male	-0.900783	0.172147	-5.23263	1.67119e-07	0.00012818
CREBBP	Colorectal Cancer	factor(sample_status)1	-0.949541	0.183007	-5.18856	2.11923e-07	0.000157619
BAP1	Renal Cell Carcinoma	factor(sample_all$sex)Male	-1.36278	0.263127	-5.17915	2.22897e-07	0.000159588
MSH6	Colorectal Cancer	factor(sample_status)1	-1.32309	0.255656	-5.17528	2.27574e-07	0.000159588
STK11	Non-Small Cell Lung Cancer	factor(sample_all$sex)Male	0.413794	0.0804979	5.14044	2.74102e-07	0.000186877
NF1	Colorectal Cancer	factor(aya_status)1	0.80956	0.196369	4.12265	3.74544e-05	0.00772505
BCOR	Non-Small Cell Lung Cancer	factor(sample_all$sex)Male	-0.919911	0.180688	-5.09115	3.5589e-07	0.00023608
PPP2R1A	Ovarian Cancer	factor(sample_subtypes)High-Grade Serous Ovarian Cancer	-1.94703	0.383231	-5.08056	3.76333e-07	0.000243072
PIK3CA	Colorectal Cancer	factor(sample_status)1	-0.469599	0.0927903	-5.06086	4.17364e-07	0.000262661
PTEN	Endometrial Cancer	factor(sample_status)1	-0.813326	0.161254	-5.04377	4.56446e-07	0.000265144
KIT	Gastrointestinal Stromal Tumor	factor(aya_status)1	-1.25038	0.323132	-3.86957	0.000109026	0.0187128
ARID1A	Ovarian Cancer	factor(sample_subtypes)Low-Grade Serous Ovarian Cancer	-5.21136	1.03391	-5.04042	4.64521e-07	0.000265144
CASP8	Colorectal Cancer	factor(sample_status)1	-1.26314	0.250073	-5.05108	4.39324e-07	0.000265144
BIRC3	Non-Small Cell Lung Cancer	factor(sample_subtypes)Lung Adenocarcinoma	-2.40485	0.476258	-5.04948	4.4301e-07	0.000265144
BRAF	Melanoma	factor(sample_subtypes)Cutaneous Melanoma	2.94465	0.596025	4.94047	7.79332e-07	0.000434725
BRAF	Thyroid Cancer	factor(aya_status)1	-1.20116	0.314841	-3.81513	0.000136113	0.0221243
CTNNB1	Hepatobiliary Cancer	factor(sample_subtypes)Hepatocellular Carcinoma	2.5922	0.530466	4.88665	1.02567e-06	0.000559423
TP53	Colorectal Cancer	factor(sample_status)1	0.403397	0.0828139	4.87113	1.10962e-06	0.000592054
RNF43	Colorectal Cancer	factor(sample_subtypes)Rectal Adenocarcinoma	-0.889353	0.182834	-4.86427	1.14881e-06	0.000599926
KRAS	Hepatobiliary Cancer	factor(sample_subtypes)Gallbladder Cancer	-1.86447	0.384895	-4.84409	1.27192e-06	0.000650373
BRAF	Melanoma	factor(sample_subtypes)Melanoma of Unknown Primary	2.97509	0.61556	4.83314	1.34395e-06	0.000654553
PIK3CA	Colorectal Cancer	factor(sample_subtypes)Rectal Adenocarcinoma	-0.537513	0.111269	-4.83076	1.3601e-06	0.000654553
POLD1	Colorectal Cancer	factor(sample_status)1	-1.21298	0.250909	-4.83434	1.33589e-06	0.000654553
MAP3K1	Breast Cancer	factor(aya_status)1	-1.69779	0.456725	-3.71732	0.000201349	0.0282888
TP53	Endometrial Cancer	factor(sample_subtypes)Uterine Serous Carcinoma/Uterine Papillary Serous Carcinoma	3.10222	0.64814	4.78634	1.69846e-06	0.000801674
TP53	Hepatobiliary Cancer	factor(sample_subtypes)Intrahepatic Cholangiocarcinoma	-1.07031	0.223957	-4.77907	1.76104e-06	0.000815528
STAG2	Melanoma	factor(sample_all$sex)Male	-1.40764	0.296366	-4.74967	2.03751e-06	0.000909248
TGFBR2	Colorectal Cancer	factor(sample_subtypes)Rectal Adenocarcinoma	-1.44979	0.305174	-4.75071	2.02705e-06	0.000909248
POLE	Colorectal Cancer	factor(sample_status)1	-0.915738	0.193261	-4.73836	2.15455e-06	0.00094431
TBX3	Endometrial Cancer	factor(sample_subtypes)Uterine Serous Carcinoma/Uterine Papillary Serous Carcinoma	-4.07088	0.86014	-4.73281	2.21437e-06	0.000953498
PTEN	Endometrial Cancer	factor(sample_subtypes)Uterine Serous Carcinoma/Uterine Papillary Serous Carcinoma	-3.13974	0.665219	-4.71986	2.36009e-06	0.000981799
CARD11	Breast Cancer	factor(aya_status)1	1.33651	0.367311	3.63863	0.000274096	0.0347199
ANKRD11	Colorectal Cancer	factor(sample_status)1	-0.925201	0.195983	-4.72082	2.34893e-06	0.000981799
KRAS	Endometrial Cancer	factor(sample_subtypes)Uterine Serous Carcinoma/Uterine Papillary Serous Carcinoma	-3.04389	0.646777	-4.70624	2.52332e-06	0.00102888
CDH1	Breast Cancer	factor(sample_subtypes)Breast Invasive Lobular Carcinoma	3.09085	0.657134	4.70352	2.55712e-06	0.00102888
NF1	Endometrial Cancer	factor(sample_subtypes)Uterine Serous Carcinoma/Uterine Papillary Serous Carcinoma	-3.64844	0.776627	-4.69781	2.62971e-06	0.00104103
SDHA	Gastrointestinal Stromal Tumor	factor(aya_status)1	2.16364	0.639646	3.38257	0.000718121	0.0652031
DNAJB1	Non-Small Cell Lung Cancer	factor(sample_subtypes)Lung Adenocarcinoma	-3.29927	0.703032	-4.69291	2.69342e-06	0.00104932
STK11	Non-Small Cell Lung Cancer	factor(sample_subtypes)Lung Adenocarcinoma	-1.0502	0.224711	-4.67358	2.95989e-06	0.00113512
ATRX	Melanoma	factor(sample_all$sex)Male	-0.953748	0.205246	-4.64685	3.37036e-06	0.00127265
PIK3CG	Non-Small Cell Lung Cancer	factor(sample_subtypes)Lung Adenocarcinoma	-1.43916	0.31127	-4.62351	3.77304e-06	0.00140311
MEN1	Pancreatic Cancer	factor(aya_status)1	-1.88765	0.559897	-3.37142	0.000747808	0.0672315
KRAS	Colorectal Cancer	factor(sample_all$sex)Male	-0.306909	0.0665927	-4.60874	4.0511e-06	0.00148403
TP53	Head and Neck Cancer	factor(sample_subtypes)Oropharynx Squamous Cell Carcinoma	-1.40683	0.305607	-4.60338	4.1569e-06	0.0015004
FAT1	Colorectal Cancer	factor(sample_status)1	-0.764126	0.166643	-4.5854	4.5312e-06	0.00157593
FAT1	Colorectal Cancer	factor(sample_subtypes)Rectal Adenocarcinoma	-0.986444	0.215029	-4.5875	4.48595e-06	0.00157593
TGFBR1	Colorectal Cancer	factor(aya_status)1	0.960374	0.292991	3.27783	0.00104609	0.0799852
PTPRS	Colorectal Cancer	factor(sample_status)1	-0.642379	0.140131	-4.58413	4.55878e-06	0.00157593
KMT2D	Colorectal Cancer	factor(sample_subtypes)Rectal Adenocarcinoma	-0.72212	0.15834	-4.56056	5.10176e-06	0.00173913
HIST1H1C	Non-Small Cell Lung Cancer	factor(sample_subtypes)Lung Adenocarcinoma	-2.07086	0.459321	-4.50853	6.52777e-06	0.00219476
BCOR	Colorectal Cancer	factor(sample_status)1	-0.98386	0.219056	-4.49135	7.07715e-06	0.00234732
TET2	Colorectal Cancer	factor(sample_status)1	-1.25141	0.27957	-4.47619	7.59884e-06	0.00248674
RB1	Bladder Cancer	factor(sample_subtypes)Upper Tract Urothelial Carcinoma	-1.56734	0.35046	-4.47223	7.74072e-06	0.00249985
TGFBR1	Melanoma	factor(aya_status)1	1.83699	0.572973	3.20606	0.00134565	0.0924545
GNAQ	Melanoma	factor(sample_subtypes)Uveal Melanoma	2.78324	0.624161	4.45917	8.22769e-06	0.00256393
SOX9	Colorectal Cancer	factor(sample_status)1	-0.54678	0.122637	-4.45852	8.25256e-06	0.00256393
ZFHX3	Colorectal Cancer	factor(sample_status)1	-0.674434	0.151119	-4.46294	8.08419e-06	0.00256393
AXIN2	Colorectal Cancer	factor(sample_status)1	-0.926824	0.20835	-4.44839	8.6516e-06	0.00265431
FBXW7	Colorectal Cancer	factor(sample_status)1	-0.488269	0.110206	-4.43053	9.40029e-06	0.0028484
ATR	Colorectal Cancer	factor(aya_status)1	0.734526	0.231802	3.16876	0.00153088	0.101351
MSH3	Colorectal Cancer	factor(sample_status)1	-1.06092	0.239684	-4.42632	9.58558e-06	0.00286913
ERBB2	Breast Cancer	factor(sample_status)1	0.898724	0.204143	4.40242	1.07051e-05	0.00312794
TP53	Non-Small Cell Lung Cancer	factor(sample_subtypes)Lung Adenocarcinoma	-1.04561	0.237443	-4.40363	1.06454e-05	0.00312794
STAT3	Ovarian Cancer	factor(sample_subtypes)High-Grade Serous Ovarian Cancer	-2.4562	0.558514	-4.39775	1.09377e-05	0.0031583
EGFR	Non-Small Cell Lung Cancer	factor(sample_subtypes)Lung Adenocarcinoma	2.24822	0.51265	4.38549	1.15725e-05	0.00330273
TP53	Breast Cancer	factor(sample_status)1	0.339665	0.0775082	4.38231	1.17425e-05	0.00331275
NF1	Endometrial Cancer	factor(sample_subtypes)Uterine Carcinosarcoma/Uterine Malignant Mixed Mullerian Tumor	-3.76081	0.858772	-4.37928	1.19069e-05	0.00332095
PIK3CA	Ovarian Cancer	factor(sample_subtypes)Low-Grade Serous Ovarian Cancer	-4.50314	1.02995	-4.3722	1.22998e-05	0.00339199
HRAS	Bladder Cancer	factor(aya_status)1	1.90341	0.603244	3.15529	0.0016034	0.10411
CTNNB1	Colorectal Cancer	factor(sample_subtypes)Rectal Adenocarcinoma	-0.934401	0.215309	-4.33981	1.42604e-05	0.00372347
KEAP1	Non-Small Cell Lung Cancer	factor(sample_subtypes)Lung Squamous Cell Carcinoma	-1.14491	0.263438	-4.34602	1.38628e-05	0.00372347
ATR	Breast Cancer	factor(sample_status)1	1.46084	0.33621	4.34502	1.3926e-05	0.00372347
AXIN2	Non-Small Cell Lung Cancer	factor(sample_subtypes)Lung Adenocarcinoma	-1.82801	0.420992	-4.34215	1.41094e-05	0.00372347
KMT2C	Colorectal Cancer	factor(sample_status)1	-0.698865	0.160888	-4.34379	1.40045e-05	0.00372347
NF1	Breast Cancer	factor(sample_status)1	0.779821	0.181008	4.30822	1.64576e-05	0.00425195
GNA11	Melanoma	factor(sample_subtypes)Uveal Melanoma	4.41684	1.02771	4.29774	1.72549e-05	0.00438221
NF1	Melanoma	factor(aya_status)1	-1.08054	0.344032	-3.14081	0.00168479	0.10603
CBFB	Breast Cancer	factor(sample_status)1	-0.80237	0.186789	-4.29559	1.74231e-05	0.00438221
TGFBR2	Colorectal Cancer	factor(sample_status)1	-0.862069	0.200837	-4.29239	1.7676e-05	0.00438221
NSD1	Endometrial Cancer	factor(sample_subtypes)Uterine Serous Carcinoma/Uterine Papillary Serous Carcinoma	-3.86175	0.902915	-4.27698	1.89446e-05	0.00464977
DOT1L	Non-Small Cell Lung Cancer	factor(sample_all$sex)Male	0.741093	0.17443	4.24865	2.15062e-05	0.00522621
KIT	Ovarian Cancer	factor(aya_status)1	2.90935	0.935765	3.10906	0.00187681	0.113181
ARID2	Breast Cancer	factor(sample_status)1	1.38677	0.327272	4.23736	2.26163e-05	0.0054421
EP300	Colorectal Cancer	factor(sample_subtypes)Rectal Adenocarcinoma	-1.07993	0.255014	-4.23478	2.28771e-05	0.00545141
KMT2A	Colorectal Cancer	factor(sample_status)1	-0.81264	0.192115	-4.22996	2.33733e-05	0.00551611
NF2	Endometrial Cancer	factor(sample_subtypes)Uterine Serous Carcinoma/Uterine Papillary Serous Carcinoma	-4.27075	1.01175	-4.22116	2.43047e-05	0.00557509
PIK3C2G	Melanoma	factor(aya_status)1	-1.59714	0.520834	-3.0665	0.00216582	0.124492
SMAD2	Breast Cancer	factor(sample_all$sex)Male	3.07536	0.728423	4.22194	2.42206e-05	0.00557509
MSH3	Colorectal Cancer	factor(sample_subtypes)Rectal Adenocarcinoma	-1.18085	0.279608	-4.22323	2.40827e-05	0.00557509
KMT2B	Colorectal Cancer	factor(sample_status)1	-0.758374	0.179951	-4.21434	2.50506e-05	0.00564076
KIT	Melanoma	factor(sample_subtypes)Melanoma of Unknown Primary	-1.99249	0.474343	-4.20053	2.66286e-05	0.00594157
TGFBR2	Breast Cancer	factor(aya_status)1	1.54806	0.514258	3.01028	0.00261006	0.141729
GRIN2A	Melanoma	factor(sample_all$sex)Male	0.662671	0.157841	4.19835	2.68867e-05	0.00594511
TP53	Soft Tissue Sarcoma	factor(sample_subtypes)Myxofibrosarcoma	2.27004	0.544113	4.172	3.01943e-05	0.00661686
SDHB	Non-Small Cell Lung Cancer	factor(sample_subtypes)Lung Adenocarcinoma	-2.37907	0.571472	-4.16305	3.1402e-05	0.00682063
LYN	Breast Cancer	factor(sample_all$sex)Male	3.39634	0.818382	4.15006	3.32384e-05	0.00715617
IDH1	Hepatobiliary Cancer	factor(sample_subtypes)Intrahepatic Cholangiocarcinoma	2.47715	0.597826	4.1436	3.41896e-05	0.00727423
BLM	Colorectal Cancer	factor(sample_status)1	-1.34576	0.32488	-4.14233	3.43795e-05	0.00727423
PTPRT	Melanoma	factor(aya_status)1	-0.886985	0.295284	-3.00384	0.00266596	0.144057
JAK1	Colorectal Cancer	factor(sample_status)1	-1.29192	0.312166	-4.13857	3.49474e-05	0.00733118
GRIN2A	Melanoma	factor(sample_subtypes)Melanoma of Unknown Primary	2.08842	0.506234	4.12541	3.70068e-05	0.00769742
TP53	Head and Neck Cancer	factor(sample_all$sex)Male	-1.10577	0.270649	-4.08562	4.39595e-05	0.00899118
KDM5A	Colorectal Cancer	factor(sample_status)1	-1.00426	0.247764	-4.05332	5.04969e-05	0.0102429
TP53	Colorectal Cancer	factor(sample_subtypes)Rectal Adenocarcinoma	0.392589	0.0972572	4.0366	5.42311e-05	0.0109102
MSH2	Colorectal Cancer	factor(aya_status)1	0.764936	0.2572	2.97409	0.0029386	0.151523
ARID1B	Colorectal Cancer	factor(sample_status)1	-0.768316	0.190731	-4.02827	5.61888e-05	0.0112122
PIK3R1	Colorectal Cancer	factor(sample_status)1	-0.772734	0.193038	-4.003	6.25433e-05	0.0123606
ARID5B	Endometrial Cancer	factor(sample_subtypes)Uterine Serous Carcinoma/Uterine Papillary Serous Carcinoma	-4.8624	1.21515	-4.00147	6.29514e-05	0.0123606
PTCH1	Colorectal Cancer	factor(sample_subtypes)Rectal Adenocarcinoma	-1.07262	0.27011	-3.97106	7.15538e-05	0.0138647
GRIN2A	Melanoma	factor(sample_subtypes)Cutaneous Melanoma	1.89098	0.476266	3.97044	7.17413e-05	0.0138647
FAT1	Endometrial Cancer	factor(sample_subtypes)Uterine Serous Carcinoma/Uterine Papillary Serous Carcinoma	-3.34082	0.842711	-3.96437	7.35896e-05	0.0141108
APC	Breast Cancer	factor(sample_status)1	1.3531	0.341515	3.96206	7.43064e-05	0.0141378
NOTCH1	Breast Cancer	factor(aya_status)1	1.00196	0.337539	2.96843	0.00299324	0.151976
KEAP1	Non-Small Cell Lung Cancer	factor(sample_subtypes)Lung Adenocarcinoma	-0.922807	0.233692	-3.94882	7.85375e-05	0.0148279
TSC2	Colorectal Cancer	factor(sample_status)1	-0.868555	0.22078	-3.93402	8.35359e-05	0.0156512
ATRX	Soft Tissue Sarcoma	factor(sample_subtypes)Undifferentiated Pleomorphic Sarcoma/Malignant Fibrous Histiocytoma/High-Grade Spindle Cell Sarcoma	1.9657	0.500731	3.92566	8.64912e-05	0.0159198
PTPRD	Melanoma	factor(sample_all$sex)Male	0.642183	0.163506	3.92759	8.58022e-05	0.0159198
HLA-A	Colorectal Cancer	factor(sample_status)1	-1.40213	0.357277	-3.92448	8.69157e-05	0.0159198
ZFHX3	Colorectal Cancer	factor(sample_subtypes)Rectal Adenocarcinoma	-0.700765	0.179061	-3.91355	9.09496e-05	0.0165353
STAG2	Non-Small Cell Lung Cancer	factor(sample_all$sex)Male	-0.809805	0.207067	-3.91084	9.19766e-05	0.0165991
AR	Colorectal Cancer	factor(sample_status)1	-0.847379	0.216791	-3.90874	9.27797e-05	0.0166218
ARID2	Esophagogastric Cancer	factor(aya_status)1	1.46183	0.498492	2.9325	0.00336245	0.163099
NSD1	Endometrial Cancer	factor(sample_subtypes)Uterine Carcinosarcoma/Uterine Malignant Mixed Mullerian Tumor	-3.86446	0.991577	-3.89729	9.72765e-05	0.0173011
IRS2	Colorectal Cancer	factor(sample_status)1	-0.968729	0.248857	-3.89271	9.91321e-05	0.0175043
ATR	Colorectal Cancer	factor(sample_status)1	-0.94298	0.243022	-3.88023	0.000104357	0.0182953
PTEN	Colorectal Cancer	factor(sample_subtypes)Rectal Adenocarcinoma	-0.824076	0.212611	-3.87597	0.000106199	0.0184081
KMT2D	Breast Cancer	factor(sample_status)1	0.819443	0.211454	3.87528	0.000106501	0.0184081
KEAP1	Endometrial Cancer	factor(sample_subtypes)Uterine Serous Carcinoma/Uterine Papillary Serous Carcinoma	-3.46344	0.896106	-3.86498	0.000111097	0.0188053
WHSC1	Breast Cancer	factor(sample_all$sex)Male	2.90298	0.750942	3.86579	0.00011073	0.0188053
PMS1	Colorectal Cancer	factor(aya_status)1	0.97998	0.337365	2.90481	0.00367476	0.171145
MSH6	Colorectal Cancer	factor(sample_subtypes)Rectal Adenocarcinoma	-1.08087	0.279829	-3.86259	0.000112191	0.0188604
PIK3C2G	Melanoma	factor(sample_all$sex)Male	0.718286	0.186777	3.84569	0.000120214	0.0200717
FAT1	Breast Cancer	factor(sample_status)1	0.858849	0.223909	3.8357	0.000125208	0.0207642
SMAD4	Hepatobiliary Cancer	factor(sample_subtypes)Hepatocellular Carcinoma	-2.19696	0.574444	-3.82449	0.000131041	0.0215857
PBRM1	Colorectal Cancer	factor(sample_status)1	-0.892389	0.23378	-3.81721	0.00013497	0.0220846
CARD11	Colorectal Cancer	factor(sample_status)1	-0.693516	0.182023	-3.81004	0.000138942	0.0224354
KMT2D	Non-Small Cell Lung Cancer	factor(sample_all$sex)Male	0.406452	0.106894	3.80238	0.000143315	0.022841
PBRM1	Renal Cell Carcinoma	factor(aya_status)1	-1.60572	0.553469	-2.90119	0.00371752	0.172074
CASP8	Colorectal Cancer	factor(sample_subtypes)Rectal Adenocarcinoma	-1.09751	0.288547	-3.80356	0.00014263	0.022841
PMS2	Endometrial Cancer	factor(sample_subtypes)Uterine Serous Carcinoma/Uterine Papillary Serous Carcinoma	-4.61388	1.2157	-3.79525	0.000147493	0.0233552
SETD2	Colorectal Cancer	factor(sample_status)1	-0.787386	0.207587	-3.79303	0.000148818	0.023414
APC	Non-Small Cell Lung Cancer	factor(sample_subtypes)Lung Squamous Cell Carcinoma	-1.59865	0.421723	-3.79077	0.00015018	0.0234778
EPHB1	Colorectal Cancer	factor(aya_status)1	0.654679	0.225795	2.89944	0.00373835	0.172147
MRE11A	Colorectal Cancer	factor(sample_status)1	-1.63002	0.431267	-3.7796	0.000157081	0.0244012
ROS1	Breast Cancer	factor(sample_status)1	1.408	0.37397	3.76502	0.000166536	0.0255304
NCOR1	Colorectal Cancer	factor(sample_subtypes)Rectal Adenocarcinoma	-0.990979	0.263305	-3.76362	0.00016747	0.0255304
POLD1	Colorectal Cancer	factor(sample_subtypes)Rectal Adenocarcinoma	-1.05603	0.28041	-3.76603	0.000165862	0.0255304
RPTOR	Bladder Cancer	factor(aya_status)1	1.86326	0.650285	2.8653	0.00416614	0.18391
PTCH1	Colorectal Cancer	factor(sample_status)1	-0.760901	0.202321	-3.76086	0.000169331	0.0256547
PPP2R1A	Colorectal Cancer	factor(sample_status)1	-1.41729	0.377679	-3.75262	0.000174993	0.0263498
CREBBP	Colorectal Cancer	factor(sample_subtypes)Rectal Adenocarcinoma	-0.775635	0.207046	-3.7462	0.000179537	0.0268692
PTPRD	Melanoma	factor(sample_subtypes)Melanoma of Unknown Primary	3.84606	1.02727	3.74397	0.000181137	0.0269444
AR	Non-Small Cell Lung Cancer	factor(sample_all$sex)Male	-0.685272	0.183211	-3.74034	0.00018377	0.0271713
ARID2	Melanoma	factor(aya_status)1	-1.69126	0.595931	-2.83802	0.00453948	0.194445
NF2	Endometrial Cancer	factor(sample_subtypes)Uterine Carcinosarcoma/Uterine Malignant Mixed Mullerian Tumor	-3.4576	0.925227	-3.73703	0.000186207	0.0273669
CIC	Endometrial Cancer	factor(sample_subtypes)Uterine Serous Carcinoma/Uterine Papillary Serous Carcinoma	-3.04133	0.815429	-3.72972	0.000191689	0.0280049
CTNNB1	Endometrial Cancer	factor(sample_status)1	0.638174	0.171548	3.72009	0.000199152	0.0282888
EPHA3	Breast Cancer	factor(sample_status)1	1.86802	0.502066	3.72066	0.000198704	0.0282888
SPEN	Endometrial Cancer	factor(sample_subtypes)Uterine Serous Carcinoma/Uterine Papillary Serous Carcinoma	-3.12459	0.840649	-3.71688	0.000201701	0.0282888
EPHA7	Melanoma	factor(sample_all$sex)Male	0.721178	0.193606	3.72499	0.000195326	0.0282888
PIK3CB	Colorectal Cancer	factor(sample_status)1	-1.33431	0.358866	-3.71814	0.000200694	0.0282888
XIAP	Colorectal Cancer	factor(aya_status)1	1.18737	0.420221	2.82558	0.00471953	0.19962
MDC1	Colorectal Cancer	factor(sample_status)1	-1.12769	0.303044	-3.72123	0.000198254	0.0282888
CDKN2A	Esophagogastric Cancer	factor(sample_subtypes)Stomach Adenocarcinoma	-1.46318	0.394243	-3.71136	0.000206151	0.0287487
KMT2D	Non-Small Cell Lung Cancer	factor(sample_subtypes)Lung Adenocarcinoma	-1.07659	0.290959	-3.70016	0.000215466	0.029878
SMARCA4	Colorectal Cancer	factor(sample_status)1	-0.683185	0.184906	-3.69477	0.000220088	0.0301779
DNMT1	Non-Small Cell Lung Cancer	factor(sample_subtypes)Lung Adenocarcinoma	-1.80895	0.489499	-3.69551	0.000219447	0.0301779
CSDE1	Gastrointestinal Stromal Tumor	factor(aya_status)1	1.6616	0.594083	2.79691	0.00515943	0.210005
PLCG2	Colorectal Cancer	factor(sample_status)1	-0.849768	0.230094	-3.69314	0.000221506	0.0302036
TP53	Breast Cancer	factor(sample_subtypes)Breast Invasive Lobular Carcinoma	-1.83029	0.496754	-3.6845	0.000229148	0.0310729
CDKN2C	Non-Small Cell Lung Cancer	factor(sample_subtypes)Lung Adenocarcinoma	-2.43682	0.662159	-3.68011	0.000233132	0.0314395
NOTCH1	Colorectal Cancer	factor(sample_status)1	-0.664651	0.180868	-3.6748	0.00023804	0.031926
ARID5B	Endometrial Cancer	factor(sample_subtypes)Uterine Carcinosarcoma/Uterine Malignant Mixed Mullerian Tumor	-4.46081	1.21556	-3.66975	0.000242792	0.0323864
RPS6KA4	Colorectal Cancer	factor(sample_status)1	-1.01233	0.276091	-3.66665	0.000245745	0.0326031
BRAF	Ovarian Cancer	factor(sample_subtypes)High-Grade Serous Ovarian Cancer	-2.09125	0.571018	-3.66233	0.000249935	0.0327033
CDH1	Breast Cancer	factor(sample_subtypes)Breast Invasive Ductal Carcinoma	-2.42471	0.662	-3.66271	0.000249564	0.0327033
PIK3CA	Cervical Cancer	factor(aya_status)1	-1.82234	0.653325	-2.78934	0.0052816	0.213264
FGFR4	Colorectal Cancer	factor(sample_status)1	-1.31653	0.359535	-3.66175	0.000250498	0.0327033
NF2	Endometrial Cancer	factor(sample_subtypes)Uterine Endometrioid Carcinoma	-2.77377	0.758008	-3.65929	0.000252917	0.0328444
SMAD4	Hepatobiliary Cancer	factor(sample_subtypes)Intrahepatic Cholangiocarcinoma	-1.3707	0.375308	-3.65221	0.000259995	0.0335859
CTNNB1	Colorectal Cancer	factor(sample_status)1	-0.589793	0.161824	-3.64466	0.000267745	0.0344059
STAG2	Breast Cancer	factor(sample_status)1	1.11591	0.306645	3.63908	0.000273615	0.0347199
PPM1D	Breast Cancer	factor(sample_all$sex)Male	2.50076	0.687342	3.63831	0.000274432	0.0347199
BRCA1	Breast Cancer	factor(sample_status)1	1.06854	0.294188	3.63218	0.000281038	0.0352179
AKT3	Colorectal Cancer	factor(aya_status)1	0.992904	0.355975	2.78925	0.00528295	0.213264
SMARCA4	Endometrial Cancer	factor(sample_subtypes)Uterine Serous Carcinoma/Uterine Papillary Serous Carcinoma	-2.94839	0.812077	-3.63068	0.000282673	0.0352179
NCOR1	Non-Small Cell Lung Cancer	factor(sample_subtypes)Lung Adenocarcinoma	-1.40822	0.387802	-3.63128	0.000282014	0.0352179
SF3B1	Melanoma	factor(sample_subtypes)Head and Neck Mucosal Melanoma	-3.75213	1.03459	-3.62669	0.000287073	0.0352524
ROS1	Melanoma	factor(sample_subtypes)Melanoma of Unknown Primary	3.71853	1.02519	3.62715	0.000286572	0.0352524
CIC	Endometrial Cancer	factor(sample_subtypes)Uterine Carcinosarcoma/Uterine Malignant Mixed Mullerian Tumor	-3.5645	0.982896	-3.62653	0.000287259	0.0352524
TSC2	Breast Cancer	factor(sample_status)1	1.48327	0.409197	3.62484	0.000289143	0.0353071
EPHA7	Colorectal Cancer	factor(aya_status)1	0.669619	0.240826	2.78051	0.00542735	0.217306
AMER1	Melanoma	factor(sample_all$sex)Male	-0.915807	0.252985	-3.62	0.000294603	0.0357957
AKT1	Pancreatic Cancer	factor(sample_subtypes)Pancreatic Adenocarcinoma	-4.41409	1.22015	-3.61767	0.000297263	0.0359398
HLA-B	Colorectal Cancer	factor(sample_status)1	-1.22673	0.339213	-3.61641	0.000298717	0.0359398
SMO	Non-Small Cell Lung Cancer	factor(sample_subtypes)Lung Adenocarcinoma	-1.49114	0.412478	-3.61509	0.000300242	0.0359471
STK11	Non-Small Cell Lung Cancer	factor(aya_status)1	-1.97907	0.717426	-2.75858	0.00580538	0.226891
TP53	Non-Small Cell Lung Cancer	factor(sample_subtypes)Lung Squamous Cell Carcinoma	0.95302	0.265	3.5963	0.000322772	0.0384568
PTEN	Colorectal Cancer	factor(sample_status)1	-0.581534	0.161895	-3.59204	0.000328101	0.0388605
CARM1	Colorectal Cancer	factor(aya_status)1	1.17896	0.428298	2.75266	0.00591127	0.228482
RB1	Non-Small Cell Lung Cancer	factor(sample_subtypes)Lung Squamous Cell Carcinoma	-1.04499	0.291201	-3.58857	0.000332493	0.0388605
RBM10	Non-Small Cell Lung Cancer	factor(sample_status)1	-0.340148	0.0947627	-3.58948	0.000331343	0.0388605
PREX2	Non-Small Cell Lung Cancer	factor(sample_subtypes)Lung Adenocarcinoma	-1.41625	0.394643	-3.58869	0.000332339	0.0388605
ATM	Breast Cancer	factor(sample_status)1	0.874214	0.243846	3.58511	0.000336936	0.0391931
EP300	Colorectal Cancer	factor(sample_status)1	-0.66529	0.185757	-3.58151	0.000341615	0.03955
RB1	Soft Tissue Sarcoma	factor(sample_subtypes)Leiomyosarcoma	3.70772	1.03577	3.57969	0.000344005	0.0396397
ARID1B	Ovarian Cancer	factor(sample_subtypes)High-Grade Serous Ovarian Cancer	-1.71563	0.479836	-3.57545	0.000349632	0.0400533
STK19	Non-Small Cell Lung Cancer	factor(aya_status)1	2.31905	0.842298	2.75325	0.00590075	0.228482
ELF3	Ovarian Cancer	factor(sample_subtypes)High-Grade Serous Ovarian Cancer	-2.88915	0.808261	-3.57453	0.000350858	0.0400533
TGFBR2	Head and Neck Cancer	factor(sample_all$sex)Male	-1.72207	0.482338	-3.57026	0.000356622	0.0405228
PIK3C2G	Colorectal Cancer	factor(sample_status)1	-0.836522	0.234613	-3.56554	0.000363112	0.0410701
IGF1R	Colorectal Cancer	factor(sample_status)1	-0.935337	0.263088	-3.55523	0.000377655	0.0425192
PDGFRA	Colorectal Cancer	factor(aya_status)1	0.746164	0.272005	2.7432	0.00608436	0.231526
SMARCA4	Endometrial Cancer	factor(sample_subtypes)Uterine Carcinosarcoma/Uterine Malignant Mixed Mullerian Tumor	-3.47674	0.980055	-3.54749	0.000388914	0.0435868
NOTCH1	Non-Small Cell Lung Cancer	factor(sample_subtypes)Lung Adenocarcinoma	-1.36635	0.385451	-3.5448	0.000392909	0.0438344
MTOR	Renal Cell Carcinoma	factor(sample_all$sex)Male	-1.17859	0.332663	-3.54289	0.000395761	0.0439528
FGFR4	Breast Cancer	factor(sample_status)1	1.4611	0.41267	3.54059	0.000399235	0.0441388
GRIN2A	Melanoma	factor(aya_status)1	-0.883554	0.324485	-2.72294	0.00647034	0.237478
DDR2	Non-Small Cell Lung Cancer	factor(sample_subtypes)Lung Adenocarcinoma	-1.36763	0.386607	-3.53753	0.000403888	0.0444531
CDK12	Colorectal Cancer	factor(sample_status)1	-0.847726	0.239844	-3.53449	0.000408563	0.0445731
TET1	Endometrial Cancer	factor(sample_subtypes)Uterine Serous Carcinoma/Uterine Papillary Serous Carcinoma	-4.55041	1.28744	-3.53446	0.000408611	0.0445731
FGFR3	Colorectal Cancer	factor(sample_status)1	-1.07542	0.304791	-3.5284	0.000418082	0.0454044
GLI1	Bladder Cancer	factor(aya_status)1	1.76525	0.658783	2.67956	0.00737183	0.257009
TRAF7	Pancreatic Cancer	factor(sample_subtypes)Pancreatic Adenocarcinoma	-4.28894	1.21642	-3.52587	0.000422093	0.0456381
KEAP1	Endometrial Cancer	factor(sample_subtypes)Uterine Carcinosarcoma/Uterine Malignant Mixed Mullerian Tumor	-3.47056	0.985154	-3.52287	0.000426908	0.0459563
FOXP1	Bladder Cancer	factor(sample_subtypes)Upper Tract Urothelial Carcinoma	1.06727	0.303107	3.5211	0.000429762	0.0460615
CTCF	Endometrial Cancer	factor(sample_subtypes)Uterine Carcinosarcoma/Uterine Malignant Mixed Mullerian Tumor	-4.23796	1.20658	-3.51237	0.000444126	0.047394
TP63	Endometrial Cancer	factor(sample_subtypes)Uterine Serous Carcinoma/Uterine Papillary Serous Carcinoma	-4.54722	1.29792	-3.50346	0.000459263	0.0487972
CTNNB1	Ovarian Cancer	factor(sample_subtypes)High-Grade Serous Ovarian Cancer	-2.23776	0.639093	-3.50146	0.000462725	0.0489531
EPCAM	Endometrial Cancer	factor(aya_status)1	2.24251	0.843406	2.65887	0.00784034	0.26801
NOTCH3	Colorectal Cancer	factor(sample_status)1	-0.548023	0.156568	-3.50021	0.000464887	0.0489707
MDC1	Non-Small Cell Lung Cancer	factor(sample_status)1	0.645332	0.184482	3.49808	0.000468618	0.0491529
IGF1R	Colorectal Cancer	factor(sample_subtypes)Rectal Adenocarcinoma	-1.24221	0.355296	-3.49627	0.000471808	0.0492768
KMT2D	Melanoma	factor(sample_subtypes)Melanoma of Unknown Primary	2.1828	0.625107	3.49188	0.000479635	0.049882
BCOR	Colorectal Cancer	factor(sample_subtypes)Rectal Adenocarcinoma	-0.923884	0.264697	-3.49035	0.000482393	0.0499572
NF2	Bladder Cancer	factor(aya_status)1	1.73512	0.654601	2.65065	0.00803378	0.271974
PPM1D	Colorectal Cancer	factor(sample_status)1	-1.19622	0.342976	-3.48777	0.000487069	0.0502295
JAK1	Endometrial Cancer	factor(sample_subtypes)Uterine Carcinosarcoma/Uterine Malignant Mixed Mullerian Tumor	-4.2055	1.20733	-3.48331	0.000495262	0.0508608
BLM	Non-Small Cell Lung Cancer	factor(sample_all$sex)Male	0.964071	0.277071	3.47951	0.000502329	0.0512149
MST1R	Colorectal Cancer	factor(sample_subtypes)Rectal Adenocarcinoma	-1.30523	0.375151	-3.47922	0.000502884	0.0512149
LATS1	Breast Cancer	factor(sample_all$sex)Male	2.47697	0.713212	3.47298	0.000514714	0.0522031
TP53	Endometrial Cancer	factor(sample_subtypes)Uterine Carcinosarcoma/Uterine Malignant Mixed Mullerian Tumor	2.17492	0.626614	3.47092	0.000518683	0.0523891
ABL1	Colorectal Cancer	factor(sample_status)1	-0.962048	0.277384	-3.46829	0.000523791	0.0524732
BRAF	Melanoma	factor(aya_status)1	0.607914	0.230029	2.64278	0.00822296	0.275134
PMS2	Endometrial Cancer	factor(sample_subtypes)Uterine Carcinosarcoma/Uterine Malignant Mixed Mullerian Tumor	-4.21723	1.21577	-3.46877	0.000522847	0.0524732
POLE	Colorectal Cancer	factor(sample_subtypes)Rectal Adenocarcinoma	-0.770147	0.222394	-3.46298	0.000534222	0.0533006
SH2B3	Bladder Cancer	factor(sample_subtypes)Upper Tract Urothelial Carcinoma	1.58392	0.457862	3.45938	0.000541418	0.0537999
AMER1	Non-Small Cell Lung Cancer	factor(sample_all$sex)Male	-0.576132	0.166625	-3.45766	0.00054489	0.0539265
NF1	Melanoma	factor(sample_subtypes)Uveal Melanoma	-3.58781	1.03886	-3.45361	0.000553137	0.0545229
ERBB2	Colorectal Cancer	factor(aya_status)1	0.560173	0.212183	2.64005	0.00828946	0.275134
CIC	Colorectal Cancer	factor(sample_subtypes)Rectal Adenocarcinoma	-0.846583	0.245525	-3.44805	0.000564641	0.0552133
RNF43	Endometrial Cancer	factor(sample_subtypes)Uterine Serous Carcinoma/Uterine Papillary Serous Carcinoma	-3.66041	1.06136	-3.44879	0.000563104	0.0552133
CIC	Colorectal Cancer	factor(sample_status)1	-0.662529	0.192679	-3.43851	0.000584922	0.0569695
MGA	Colorectal Cancer	factor(sample_subtypes)Rectal Adenocarcinoma	-0.763376	0.222811	-3.42611	0.000612287	0.0593991
POLD1	Endometrial Cancer	factor(sample_subtypes)Uterine Serous Carcinoma/Uterine Papillary Serous Carcinoma	-4.39311	1.28287	-3.42443	0.000616093	0.059533
MCL1	Breast Cancer	factor(sample_all$sex)Male	3.18785	0.931883	3.42087	0.000624217	0.0600815
HNF1A	Colorectal Cancer	factor(sample_status)1	-0.823521	0.241132	-3.41523	0.000637273	0.0610985
TMEM127	Breast Cancer	factor(sample_all$sex)Male	3.20613	0.939675	3.41196	0.000644985	0.0615973
ROS1	Melanoma	factor(aya_status)1	-0.881663	0.33395	-2.6401	0.0082881	0.275134
RICTOR	Endometrial Cancer	factor(sample_subtypes)Uterine Serous Carcinoma/Uterine Papillary Serous Carcinoma	-3.63781	1.06866	-3.40407	0.000663887	0.0631567
BRAF	Colorectal Cancer	factor(sample_status)1	-0.411969	0.121117	-3.40143	0.000670347	0.063525
INSR	Colorectal Cancer	factor(sample_status)1	-1.16877	0.343858	-3.39899	0.000676353	0.0638477
KRAS	Hepatobiliary Cancer	factor(sample_subtypes)Gallbladder Adenocarcinoma, NOS	-1.9194	0.566522	-3.38804	0.000703937	0.0645639
MLH1	Colorectal Cancer	factor(sample_subtypes)Rectal Adenocarcinoma	-1.4594	0.430026	-3.39375	0.000689425	0.0645639
IGF1R	Endometrial Cancer	factor(sample_subtypes)Uterine Serous Carcinoma/Uterine Papillary Serous Carcinoma	-4.36041	1.28585	-3.39106	0.000696225	0.0645639
SPEN	Endometrial Cancer	factor(sample_subtypes)Uterine Carcinosarcoma/Uterine Malignant Mixed Mullerian Tumor	-3.01614	0.88954	-3.39067	0.00069721	0.0645639
NOTCH4	Melanoma	factor(aya_status)1	-1.37944	0.522415	-2.64051	0.00827813	0.275134
RBM10	Melanoma	factor(sample_all$sex)Male	-1.33961	0.39544	-3.38763	0.000704984	0.0645639
PIK3C3	Breast Cancer	factor(sample_all$sex)Male	3.0863	0.910936	3.38806	0.000703894	0.0645639
TCF7L2	Colorectal Cancer	factor(sample_status)1	-0.409435	0.120682	-3.39269	0.000692103	0.0645639
STK40	Non-Small Cell Lung Cancer	factor(sample_subtypes)Lung Adenocarcinoma	-2.20102	0.64938	-3.38942	0.000700412	0.0645639
PIK3CB	Endometrial Cancer	factor(sample_subtypes)Uterine Serous Carcinoma/Uterine Papillary Serous Carcinoma	-4.33626	1.28149	-3.38377	0.000714988	0.0652031
MST1R	Endometrial Cancer	factor(sample_subtypes)Uterine Serous Carcinoma/Uterine Papillary Serous Carcinoma	-4.36291	1.29009	-3.38187	0.000719933	0.0652031
FOXA1	Breast Cancer	factor(aya_status)1	-1.89356	0.716319	-2.64347	0.00820621	0.275134
FLT4	Non-Small Cell Lung Cancer	factor(sample_subtypes)Lung Adenocarcinoma	-1.30229	0.385411	-3.37897	0.000727575	0.0656529
RASA1	Colorectal Cancer	factor(sample_status)1	-0.888569	0.263899	-3.36708	0.000759697	0.0680511
EPHA5	Non-Small Cell Lung Cancer	factor(sample_subtypes)Lung Adenocarcinoma	-1.03785	0.308448	-3.36473	0.000766188	0.068383
CDC73	Non-Small Cell Lung Cancer	factor(sample_subtypes)Lung Adenocarcinoma	-1.82446	0.542488	-3.36313	0.000770627	0.0685299
KEAP1	Non-Small Cell Lung Cancer	factor(aya_status)1	-1.88988	0.717437	-2.6342	0.00843347	0.278214
KDR	Endometrial Cancer	factor(sample_subtypes)Uterine Serous Carcinoma/Uterine Papillary Serous Carcinoma	-3.58222	1.06589	-3.36077	0.000777265	0.0688707
BRAF	Melanoma	factor(sample_subtypes)others	2.50751	0.74655	3.35879	0.00078284	0.0689931
BRD4	Colorectal Cancer	factor(sample_status)1	-0.806325	0.2401	-3.35829	0.000784268	0.0689931
CSF1R	Melanoma	factor(sample_all$sex)Male	1.09058	0.324998	3.35566	0.000791757	0.0691561
TSC1	Colorectal Cancer	factor(aya_status)1	0.754684	0.286585	2.63337	0.00845421	0.278262
TBX3	Melanoma	factor(sample_all$sex)Male	1.2311	0.366854	3.35584	0.000791244	0.0691561
TP53	Breast Cancer	factor(sample_all$sex)Male	-2.03226	0.606197	-3.35248	0.000800923	0.0692718
BLM	Breast Cancer	factor(sample_status)1	1.86019	0.554757	3.35316	0.000798941	0.0692718
GRIN2A	Colorectal Cancer	factor(sample_subtypes)Rectal Adenocarcinoma	-0.705016	0.210342	-3.35177	0.000802975	0.0692718
PLK2	Endometrial Cancer	factor(sample_subtypes)Uterine Serous Carcinoma/Uterine Papillary Serous Carcinoma	-4.30585	1.28484	-3.35129	0.00080437	0.0692718
MEN1	Colorectal Cancer	factor(sample_status)1	-1.58398	0.472911	-3.34944	0.000809756	0.0694918
TSC1	Endometrial Cancer	factor(sample_subtypes)Uterine Serous Carcinoma/Uterine Papillary Serous Carcinoma	-3.31519	0.990136	-3.34822	0.00081333	0.0695553
ALK	Melanoma	factor(aya_status)1	-1.5677	0.596692	-2.62732	0.00860606	0.281636
DAXX	Endometrial Cancer	factor(sample_subtypes)Uterine Serous Carcinoma/Uterine Papillary Serous Carcinoma	-4.28954	1.28233	-3.3451	0.000822524	0.0700973
AXIN2	Non-Small Cell Lung Cancer	factor(sample_subtypes)Lung Squamous Cell Carcinoma	-1.84703	0.552422	-3.3435	0.000827279	0.0702586
NF1	Colorectal Cancer	factor(sample_status)1	-0.634041	0.189924	-3.33839	0.00084266	0.0702778
KDM5C	Endometrial Cancer	factor(sample_subtypes)Uterine Serous Carcinoma/Uterine Papillary Serous Carcinoma	-3.54121	1.06064	-3.33875	0.000841563	0.0702778
DDR2	Colorectal Cancer	factor(aya_status)1	0.830296	0.319412	2.59945	0.00933725	0.294081
TERT	Pancreatic Cancer	factor(sample_subtypes)Pancreatic Adenocarcinoma	-4.07473	1.22081	-3.33772	0.000844685	0.0702778
GLI1	Pancreatic Cancer	factor(sample_subtypes)Pancreatic Adenocarcinoma	-4.21153	1.26072	-3.34057	0.00083608	0.0702778
FAT1	Non-Small Cell Lung Cancer	factor(sample_subtypes)Lung Adenocarcinoma	-0.967739	0.289664	-3.3409	0.000835072	0.0702778
PIK3R3	Endometrial Cancer	factor(sample_subtypes)Uterine Serous Carcinoma/Uterine Papillary Serous Carcinoma	-4.34235	1.30063	-3.33866	0.000841848	0.0702778
CBFB	Breast Cancer	factor(aya_status)1	-1.19161	0.460956	-2.58509	0.00973547	0.301321
PTEN	Non-Small Cell Lung Cancer	factor(sample_subtypes)Lung Adenocarcinoma	-1.28231	0.384941	-3.33118	0.000864789	0.0717074
PGR	Colorectal Cancer	factor(sample_status)1	-0.926379	0.278454	-3.32687	0.000878277	0.0725806
PTPRD	Melanoma	factor(sample_subtypes)Cutaneous Melanoma	3.36882	1.01322	3.32486	0.000884632	0.072809
ASXL2	Colorectal Cancer	factor(sample_status)1	-0.951397	0.28621	-3.32412	0.000886974	0.072809
RUNX1	Breast Cancer	factor(aya_status)1	-1.81972	0.716911	-2.53828	0.01114	0.328235
ARAF	Non-Small Cell Lung Cancer	factor(sample_all$sex)Male	-0.872556	0.263721	-3.30864	0.00093752	0.0767016
CREBBP	Endometrial Cancer	factor(sample_subtypes)Uterine Serous Carcinoma/Uterine Papillary Serous Carcinoma	-3.23917	0.980165	-3.30472	0.000950706	0.0772654
IRS1	Colorectal Cancer	factor(sample_status)1	-0.702236	0.212481	-3.30494	0.000949957	0.0772654
CDKN2A	Head and Neck Cancer	factor(sample_all$sex)Male	-0.915113	0.277116	-3.30228	0.000959025	0.0774287
PIK3CD	Non-Small Cell Lung Cancer	factor(sample_subtypes)Lung Adenocarcinoma	-1.79431	0.543266	-3.30281	0.000957208	0.0774287
SF3B1	Colorectal Cancer	factor(sample_status)1	-1.13705	0.344692	-3.29872	0.00097125	0.0780441
FLT1	Melanoma	factor(aya_status)1	-1.50969	0.59722	-2.52786	0.0114761	0.335321
SYK	Melanoma	factor(sample_status)1	-0.936561	0.284001	-3.29773	0.000974684	0.0780441
FUBP1	Endometrial Cancer	factor(sample_subtypes)Uterine Serous Carcinoma/Uterine Papillary Serous Carcinoma	-3.51604	1.06634	-3.2973	0.000976188	0.0780441
PDGFRA	Non-Small Cell Lung Cancer	factor(sample_subtypes)Lung Adenocarcinoma	-1.14509	0.347379	-3.29638	0.000979392	0.0780461
RICTOR	Colorectal Cancer	factor(sample_status)1	-0.976259	0.296256	-3.29532	0.000983086	0.078087
KMT2D	Bladder Cancer	factor(sample_subtypes)Upper Tract Urothelial Carcinoma	0.507874	0.154181	3.294	0.000987711	0.0782012
PLK2	Colorectal Cancer	factor(aya_status)1	0.777039	0.307817	2.52436	0.011591	0.336276
RB1	Colorectal Cancer	factor(sample_status)1	-1.04437	0.31737	-3.29069	0.000999404	0.078576
DIS3	Endometrial Cancer	factor(sample_subtypes)Uterine Serous Carcinoma/Uterine Papillary Serous Carcinoma	-3.25885	0.990547	-3.28995	0.00100205	0.078576
PLCG2	Colorectal Cancer	factor(sample_subtypes)Rectal Adenocarcinoma	-0.902404	0.274263	-3.29028	0.00100086	0.078576
ARID1B	Endometrial Cancer	factor(sample_subtypes)Uterine Serous Carcinoma/Uterine Papillary Serous Carcinoma	-3.47385	1.05626	-3.28884	0.00100603	0.0786367
PTEN	Ovarian Cancer	factor(sample_subtypes)High-Grade Serous Ovarian Cancer	-1.78684	0.54352	-3.28754	0.00101067	0.0787486
BRCA2	Colorectal Cancer	factor(sample_status)1	-0.562588	0.171174	-3.28665	0.00101388	0.0787486
INPPL1	Colorectal Cancer	factor(sample_status)1	-0.905122	0.275496	-3.28543	0.00101827	0.0788404
SMARCA4	Breast Cancer	factor(sample_status)1	1.11676	0.340034	3.28427	0.00102247	0.078917
BRCA1	Colorectal Cancer	factor(aya_status)1	0.652512	0.261322	2.49696	0.0125262	0.349923
SF3B1	Endometrial Cancer	factor(sample_subtypes)Uterine Serous Carcinoma/Uterine Papillary Serous Carcinoma	-3.2592	0.993414	-3.28081	0.0010351	0.0796413
CSDE1	Endometrial Cancer	factor(sample_subtypes)Uterine Serous Carcinoma/Uterine Papillary Serous Carcinoma	-4.23377	1.2914	-3.27844	0.00104384	0.0799852
NTRK1	Endometrial Cancer	factor(sample_subtypes)Uterine Serous Carcinoma/Uterine Papillary Serous Carcinoma	-4.1816	1.27678	-3.2751	0.00105625	0.080511
AXL	Colorectal Cancer	factor(sample_status)1	-0.758953	0.231918	-3.2725	0.00106602	0.0810041
PDGFRB	Colorectal Cancer	factor(sample_status)1	-1.08079	0.330518	-3.26999	0.00107552	0.0811778
SMARCA4	Ovarian Cancer	factor(sample_subtypes)High-Grade Serous Ovarian Cancer	-2.13057	0.651867	-3.26841	0.00108153	0.0811778
TGFBR2	Endometrial Cancer	factor(sample_subtypes)Uterine Serous Carcinoma/Uterine Papillary Serous Carcinoma	-4.19463	1.28337	-3.26845	0.00108139	0.0811778
KDM5C	Colorectal Cancer	factor(aya_status)1	0.688837	0.276681	2.48964	0.0127871	0.353316
ANKRD11	Colorectal Cancer	factor(sample_subtypes)Rectal Adenocarcinoma	-0.694198	0.212253	-3.27062	0.00107313	0.0811778
GATA3	Melanoma	factor(sample_all$sex)Male	1.56442	0.479115	3.26522	0.00109379	0.081509
SPEN	Breast Cancer	factor(sample_subtypes)Breast Invasive Ductal Carcinoma	-1.95414	0.598571	-3.26467	0.00109591	0.081509
TOP1	Non-Small Cell Lung Cancer	factor(sample_subtypes)Lung Adenocarcinoma	-1.78708	0.547194	-3.2659	0.00109118	0.081509
KRAS	Pancreatic Cancer	factor(sample_subtypes)Pancreatic Neuroendocrine Tumor	-3.89163	1.19397	-3.25941	0.00111644	0.0827031
RB1	Endometrial Cancer	factor(sample_subtypes)Uterine Serous Carcinoma/Uterine Papillary Serous Carcinoma	-3.08356	0.946332	-3.25844	0.00112028	0.0827031
CDH1	Breast Cancer	factor(aya_status)1	-1.24696	0.501875	-2.4846	0.0129698	0.356473
IGF2	Non-Small Cell Lung Cancer	factor(sample_subtypes)Lung Adenocarcinoma	-1.78822	0.548874	-3.25798	0.00112207	0.0827031
BRCA1	Endometrial Cancer	factor(sample_subtypes)Uterine Serous Carcinoma/Uterine Papillary Serous Carcinoma	-3.45625	1.06173	-3.25529	0.00113276	0.0832408
PTPRD	Colorectal Cancer	factor(sample_status)1	-0.683149	0.210002	-3.25306	0.00114171	0.0833992
ERCC5	Endometrial Cancer	factor(sample_subtypes)Uterine Serous Carcinoma/Uterine Papillary Serous Carcinoma	-3.44659	1.05943	-3.25323	0.001141	0.0833992
TNFAIP3	Bladder Cancer	factor(aya_status)1	1.9571	0.789234	2.47975	0.0131474	0.359344
MET	Endometrial Cancer	factor(sample_subtypes)Uterine Serous Carcinoma/Uterine Papillary Serous Carcinoma	-3.20757	0.987083	-3.24954	0.00115592	0.0841867
KDR	Non-Small Cell Lung Cancer	factor(sample_subtypes)Lung Adenocarcinoma	-1.17707	0.362518	-3.24692	0.00116661	0.0847139
PBRM1	Endometrial Cancer	factor(sample_subtypes)Uterine Carcinosarcoma/Uterine Malignant Mixed Mullerian Tumor	-4.20379	1.29643	-3.24259	0.0011845	0.0857592
IRS2	Endometrial Cancer	factor(sample_subtypes)Uterine Serous Carcinoma/Uterine Papillary Serous Carcinoma	-3.42303	1.05775	-3.23616	0.00121151	0.0874566
RECQL4	Esophagogastric Cancer	factor(aya_status)1	1.83591	0.743374	2.4697	0.0135227	0.365127
ATM	Colorectal Cancer	factor(sample_subtypes)Rectal Adenocarcinoma	-0.556465	0.172002	-3.23523	0.00121545	0.087484
NSD1	Head and Neck Cancer	factor(sample_subtypes)Larynx Squamous Cell Carcinoma	1.95099	0.603564	3.23245	0.00122733	0.0880806
ERRFI1	Non-Small Cell Lung Cancer	factor(sample_status)1	1.11446	0.345153	3.22888	0.00124278	0.088671
TCF3	Colorectal Cancer	factor(sample_status)1	-0.99158	0.307047	-3.22941	0.00124047	0.088671
KDM5C	Renal Cell Carcinoma	factor(sample_all$sex)Male	2.35311	0.72938	3.22618	0.00125453	0.0889917
JUN	Non-Small Cell Lung Cancer	factor(sample_status)1	1.15923	0.359316	3.22622	0.00125436	0.0889917
ARID2	Endometrial Cancer	factor(sample_subtypes)Uterine Serous Carcinoma/Uterine Papillary Serous Carcinoma	-4.1074	1.274	-3.22401	0.00126407	0.0894101
CARD11	Melanoma	factor(aya_status)1	-1.47392	0.597524	-2.46672	0.0136358	0.365532
ARID1A	Non-Small Cell Lung Cancer	factor(sample_status)1	0.35925	0.1116	3.2191	0.00128594	0.0904361
TET1	Endometrial Cancer	factor(sample_subtypes)Uterine Carcinosarcoma/Uterine Malignant Mixed Mullerian Tumor	-4.14572	1.28784	-3.21912	0.00128586	0.0904361
RB1	Soft Tissue Sarcoma	factor(sample_subtypes)Undifferentiated Pleomorphic Sarcoma/Malignant Fibrous Histiocytoma/High-Grade Spindle Cell Sarcoma	3.31707	1.03084	3.21782	0.0012917	0.0905813
ERCC2	Bladder Cancer	factor(sample_status)1	-0.910569	0.283242	-3.21481	0.00130532	0.0912757
STAT5A	Colorectal Cancer	factor(aya_status)1	0.899899	0.365542	2.46182	0.0138234	0.368384
KRAS	Endometrial Cancer	factor(sample_subtypes)Uterine Carcinosarcoma/Uterine Malignant Mixed Mullerian Tumor	-1.99809	0.622026	-3.21223	0.00131711	0.0915781
CHEK2	Ovarian Cancer	factor(sample_subtypes)High-Grade Serous Ovarian Cancer	-2.52032	0.784566	-3.21238	0.00131641	0.0915781
XIAP	Non-Small Cell Lung Cancer	factor(sample_all$sex)Male	-3.2575	1.01459	-3.21066	0.0013243	0.0918181
PDGFRA	Colorectal Cancer	factor(sample_status)1	-0.919991	0.287086	-3.20459	0.00135257	0.0924545
NOTCH3	Melanoma	factor(aya_status)1	-1.28591	0.522588	-2.46066	0.0138682	0.368778
ROS1	Melanoma	factor(sample_subtypes)Cutaneous Melanoma	3.2433	1.01232	3.20384	0.00135608	0.0924545
SETD2	Renal Cell Carcinoma	factor(sample_status)1	0.705765	0.220158	3.20572	0.00134727	0.0924545
CTCF	Bladder Cancer	factor(sample_subtypes)Upper Tract Urothelial Carcinoma	1.05839	0.330089	3.20637	0.00134419	0.0924545
NOTCH2	Breast Cancer	factor(sample_status)1	0.893183	0.278691	3.20492	0.00135102	0.0924545
PPARG	Non-Small Cell Lung Cancer	factor(aya_status)1	1.87755	0.767152	2.44743	0.0143878	0.377685
DNMT3B	Colorectal Cancer	factor(sample_status)1	-0.893167	0.279067	-3.20055	0.00137165	0.0932567
DNMT3A	Colorectal Cancer	factor(sample_status)1	-0.947019	0.296261	-3.19657	0.00139071	0.0942915
STAG2	Endometrial Cancer	factor(sample_subtypes)Uterine Serous Carcinoma/Uterine Papillary Serous Carcinoma	-3.01349	0.94356	-3.19375	0.00140438	0.0944531
SYK	Non-Small Cell Lung Cancer	factor(sample_subtypes)Lung Adenocarcinoma	-2.02115	0.632757	-3.1942	0.00140219	0.0944531
HLA-A	Colorectal Cancer	factor(sample_subtypes)Rectal Adenocarcinoma	-1.37708	0.431185	-3.1937	0.00140464	0.0944531
DAXX	Pancreatic Cancer	factor(aya_status)1	-1.83442	0.752138	-2.43894	0.0147305	0.383758
KMT2B	Endometrial Cancer	factor(sample_subtypes)Uterine Serous Carcinoma/Uterine Papillary Serous Carcinoma	-2.51811	0.7897	-3.18869	0.00142919	0.0958415
ARID1A	Non-Small Cell Lung Cancer	factor(sample_subtypes)Lung Neuroendocrine Tumor	1.85779	0.586249	3.16895	0.00152992	0.101351
ERCC5	Colorectal Cancer	factor(sample_subtypes)Rectal Adenocarcinoma	-1.26876	0.400423	-3.16855	0.00153199	0.101351
TCF3	Colorectal Cancer	factor(sample_subtypes)Rectal Adenocarcinoma	-1.36464	0.430582	-3.16929	0.00152813	0.101351
HIST1H3D	Endometrial Cancer	factor(sample_subtypes)Uterine Endometrioid Carcinoma	-4.13357	1.30445	-3.16881	0.00153066	0.101351
YES1	Endometrial Cancer	factor(sample_subtypes)Uterine Serous Carcinoma/Uterine Papillary Serous Carcinoma	-3.37992	1.06705	-3.16754	0.00153734	0.101432
PREX2	Melanoma	factor(sample_subtypes)Cutaneous Melanoma	2.31315	0.730644	3.16591	0.001546	0.101729
RARA	Colorectal Cancer	factor(aya_status)1	0.8425	0.347218	2.42643	0.0152483	0.388424
NOTCH4	Breast Cancer	factor(sample_status)1	1.01325	0.320755	3.15896	0.00158334	0.103907
CTCF	Colorectal Cancer	factor(sample_status)1	-0.733089	0.232222	-3.15685	0.00159484	0.10411
FLCN	Colorectal Cancer	factor(sample_status)1	-0.763033	0.241759	-3.15617	0.00159854	0.10411
PTPRS	Endometrial Cancer	factor(sample_subtypes)Uterine Serous Carcinoma/Uterine Papillary Serous Carcinoma	-3.08015	0.976132	-3.15547	0.00160241	0.10411
FGFR2	Ovarian Cancer	factor(sample_subtypes)High-Grade Serous Ovarian Cancer	-1.85723	0.589308	-3.15155	0.00162409	0.104747
BAP1	Hepatobiliary Cancer	factor(sample_all$sex)Male	-0.786862	0.249816	-3.14977	0.00163398	0.104747
AMER1	Endometrial Cancer	factor(sample_status)1	-2.32521	0.738238	-3.14967	0.00163454	0.104747
AXIN1	Colorectal Cancer	factor(sample_subtypes)Rectal Adenocarcinoma	-1.07186	0.340147	-3.15115	0.00162629	0.104747
WHSC1	Colorectal Cancer	factor(aya_status)1	0.775209	0.319509	2.42625	0.0152559	0.388424
EPHA7	Breast Cancer	factor(sample_status)1	1.29134	0.409951	3.14998	0.00163284	0.104747
PTCH1	Melanoma	factor(sample_all$sex)Male	1.2251	0.389269	3.14719	0.00164847	0.105091
RASA1	Colorectal Cancer	factor(sample_subtypes)Rectal Adenocarcinoma	-1.07009	0.339952	-3.14776	0.00164528	0.105091
TBX3	Endometrial Cancer	factor(sample_subtypes)Uterine Endometrioid Carcinoma	-2.05895	0.65459	-3.1454	0.0016586	0.105463
NBN	Colorectal Cancer	factor(sample_status)1	-1.08982	0.346604	-3.14429	0.00166489	0.105533
FOXA1	Breast Cancer	factor(sample_status)1	0.54821	0.174384	3.14369	0.0016683	0.105533
PTPRS	Colorectal Cancer	factor(sample_subtypes)Rectal Adenocarcinoma	-0.500202	0.159206	-3.14186	0.00167877	0.105922
RAC1	Germ Cell Tumor	factor(aya_status)1	-1.3826	0.573994	-2.40874	0.0160078	0.399388
MGA	Colorectal Cancer	factor(sample_status)1	-0.567198	0.18068	-3.13923	0.00169391	0.106331
STK11	Endometrial Cancer	factor(sample_subtypes)Uterine Serous Carcinoma/Uterine Papillary Serous Carcinoma	-4.0109	1.27822	-3.13789	0.00170169	0.106547
MED12	Colorectal Cancer	factor(sample_status)1	-0.630366	0.201235	-3.13248	0.00173333	0.108252
ARID2	Melanoma	factor(sample_subtypes)Melanoma of Unknown Primary	2.35898	0.753325	3.13142	0.0017396	0.108368
GNAS	Non-Small Cell Lung Cancer	factor(aya_status)1	1.27072	0.528069	2.40636	0.0161123	0.400902
KMT2D	Melanoma	factor(sample_subtypes)Cutaneous Melanoma	1.87741	0.6001	3.1285	0.00175698	0.109047
MED12	Endometrial Cancer	factor(sample_status)1	-0.838598	0.268085	-3.1281	0.0017594	0.109047
KDM5C	Colorectal Cancer	factor(sample_status)1	-0.874227	0.279588	-3.12684	0.00176697	0.109241
SLX4	Colorectal Cancer	factor(sample_status)1	-0.946763	0.302938	-3.12527	0.00177643	0.109549
CALR	Colorectal Cancer	factor(aya_status)1	1.09819	0.45759	2.39995	0.0163975	0.40373
POLD1	Endometrial Cancer	factor(sample_subtypes)Uterine Carcinosarcoma/Uterine Malignant Mixed Mullerian Tumor	-4.00902	1.28359	-3.12328	0.00178846	0.110015
RPS6KA4	Endometrial Cancer	factor(sample_subtypes)Uterine Serous Carcinoma/Uterine Papillary Serous Carcinoma	-3.06311	0.981497	-3.12086	0.00180326	0.110648
NOTCH3	Non-Small Cell Lung Cancer	factor(sample_subtypes)Lung Adenocarcinoma	-1.19614	0.383409	-3.11974	0.00181009	0.11079
BIRC3	Non-Small Cell Lung Cancer	factor(sample_subtypes)Lung Squamous Cell Carcinoma	-1.85971	0.596505	-3.11767	0.00182287	0.111295
NF1	Gastrointestinal Stromal Tumor	factor(aya_status)1	1.33516	0.559063	2.38822	0.0169304	0.407316
KMT2B	Endometrial Cancer	factor(sample_subtypes)Uterine Carcinosarcoma/Uterine Malignant Mixed Mullerian Tumor	-2.77505	0.890376	-3.11672	0.00182878	0.111379
STK19	Breast Cancer	factor(sample_all$sex)Male	2.92704	0.939919	3.11415	0.00184478	0.112075
NOTCH3	Pancreatic Cancer	factor(sample_subtypes)Pancreatic Adenocarcinoma	-3.69646	1.18754	-3.11271	0.00185381	0.112345
KMT2C	Melanoma	factor(aya_status)1	-1.12316	0.470648	-2.3864	0.0170141	0.407758
MED12	Melanoma	factor(sample_all$sex)Male	-0.834869	0.268449	-3.10997	0.00187106	0.113111
CD79A	Colorectal Cancer	factor(sample_status)1	-1.87153	0.602293	-3.10734	0.00188782	0.113565
ARID2	Colorectal Cancer	factor(sample_status)1	-0.608129	0.19623	-3.09906	0.00194135	0.1165
ATM	Colorectal Cancer	factor(sample_status)1	-0.43213	0.13963	-3.09482	0.00196933	0.117891
BMPR1A	Breast Cancer	factor(aya_status)1	1.46155	0.616451	2.37091	0.0177442	0.4182
KDR	Colorectal Cancer	factor(sample_status)1	-0.703806	0.227668	-3.09137	0.00199238	0.11898
BLM	Endometrial Cancer	factor(sample_subtypes)Uterine Carcinosarcoma/Uterine Malignant Mixed Mullerian Tumor	-3.30739	1.07125	-3.08742	0.00201902	0.120279
APC	Colorectal Cancer	factor(sample_all$sex)Male	0.235056	0.0762311	3.08347	0.00204605	0.121381
SOX2	Colorectal Cancer	factor(sample_status)1	-1.4698	0.476702	-3.08327	0.00204741	0.121381
RFWD2	Colorectal Cancer	factor(sample_status)1	-1.35062	0.438256	-3.08182	0.00205742	0.12168
FBXW7	Breast Cancer	factor(aya_status)1	1.26409	0.534884	2.36329	0.0181133	0.421697
IGF1R	Endometrial Cancer	factor(sample_subtypes)Uterine Carcinosarcoma/Uterine Malignant Mixed Mullerian Tumor	-3.96019	1.28585	-3.07983	0.00207121	0.122202
RB1	Soft Tissue Sarcoma	factor(sample_subtypes)Myxofibrosarcoma	3.37143	1.09623	3.07548	0.00210163	0.123405
NCOR1	Colorectal Cancer	factor(sample_status)1	-0.597119	0.194237	-3.07418	0.00211084	0.123405
PAK7	Hepatobiliary Cancer	factor(sample_status)1	2.02636	0.658913	3.07531	0.00210286	0.123405
SOX17	Breast Cancer	factor(sample_status)1	1.29391	0.420915	3.07405	0.00211173	0.123405
MTOR	Colorectal Cancer	factor(sample_status)1	-0.556553	0.181232	-3.07094	0.00213389	0.124109
NOTCH4	Endometrial Cancer	factor(sample_subtypes)Uterine Serous Carcinoma/Uterine Papillary Serous Carcinoma	-2.99701	0.975764	-3.07145	0.0021302	0.124109
EIF4A2	Colorectal Cancer	factor(aya_status)1	1.05156	0.445069	2.3627	0.0181426	0.421697
SMO	Non-Small Cell Lung Cancer	factor(sample_subtypes)Lung Squamous Cell Carcinoma	-1.536	0.500443	-3.06928	0.00214573	0.124492
CDKN2B	Endometrial Cancer	factor(sample_subtypes)Uterine Endometrioid Carcinoma	-3.9624	1.29161	-3.0678	0.00215639	0.124492
GLI1	Colorectal Cancer	factor(sample_status)1	-0.67618	0.220496	-3.06663	0.00216487	0.124492
ERF	Breast Cancer	factor(sample_subtypes)Breast Invasive Ductal Carcinoma	-4.1267	1.34509	-3.06798	0.00215508	0.124492
HIST1H3G	Breast Cancer	factor(sample_subtypes)Breast Invasive Ductal Carcinoma	-3.73635	1.22154	-3.05873	0.00222278	0.127467
MET	Endometrial Cancer	factor(sample_subtypes)Uterine Carcinosarcoma/Uterine Malignant Mixed Mullerian Tumor	-3.91114	1.28068	-3.05395	0.0022585	0.128316
ATR	Endometrial Cancer	factor(sample_subtypes)Uterine Serous Carcinoma/Uterine Papillary Serous Carcinoma	-2.85248	0.933884	-3.05443	0.00225489	0.128316
PARP1	Breast Cancer	factor(sample_all$sex)Male	2.39534	0.784127	3.05478	0.00225223	0.128316
FOXP1	Bladder Cancer	factor(aya_status)1	1.52357	0.646025	2.35838	0.0183548	0.423005
MSH3	Endometrial Cancer	factor(sample_subtypes)Uterine Serous Carcinoma/Uterine Papillary Serous Carcinoma	-3.89554	1.27497	-3.0554	0.00224761	0.128316
PIK3CA	Endometrial Cancer	factor(sample_status)1	-0.38549	0.126393	-3.04993	0.00228895	0.129746
APC	Endometrial Cancer	factor(sample_subtypes)Uterine Serous Carcinoma/Uterine Papillary Serous Carcinoma	-2.84574	0.933328	-3.04902	0.00229589	0.12984
CDKN2A	Non-Small Cell Lung Cancer	factor(sample_subtypes)Lung Squamous Cell Carcinoma	1.32657	0.435644	3.04508	0.00232619	0.131251
PTEN	Endometrial Cancer	factor(sample_subtypes)Uterine Carcinosarcoma/Uterine Malignant Mixed Mullerian Tumor	-1.9393	0.63701	-3.04438	0.00233157	0.131252
SETD2	Melanoma	factor(sample_all$sex)Male	0.780867	0.256596	3.04317	0.00234097	0.131368
KDM5A	Breast Cancer	factor(sample_subtypes)Breast Invasive Ductal Carcinoma	-2.426	0.797308	-3.04274	0.00234432	0.131368
FAT1	Bladder Cancer	factor(aya_status)1	1.15222	0.489409	2.3543	0.0185576	0.424527
PLK2	Endometrial Cancer	factor(sample_subtypes)Uterine Carcinosarcoma/Uterine Malignant Mixed Mullerian Tumor	-3.90753	1.28472	-3.04155	0.00235365	0.13159
KMT2D	Endometrial Cancer	factor(sample_subtypes)Uterine Serous Carcinoma/Uterine Papillary Serous Carcinoma	-2.28082	0.751277	-3.03592	0.00239805	0.133768
FBXW7	Colorectal Cancer	factor(sample_subtypes)Rectal Adenocarcinoma	0.33629	0.110808	3.03488	0.00240628	0.133922
PTEN	Renal Cell Carcinoma	factor(sample_status)1	1.43216	0.472239	3.03271	0.00242367	0.134585
PREX2	Colorectal Cancer	factor(sample_subtypes)Rectal Adenocarcinoma	-0.813085	0.268204	-3.03159	0.00243269	0.134781
GNAS	Colorectal Cancer	factor(sample_status)1	-0.750354	0.247769	-3.02845	0.00245813	0.135884
CARD11	Colorectal Cancer	factor(aya_status)1	0.480713	0.204715	2.34821	0.018864	0.426727
PIK3R2	Colorectal Cancer	factor(sample_status)1	-0.931842	0.307871	-3.02673	0.00247217	0.136047
FUBP1	Colorectal Cancer	factor(sample_status)1	-1.82584	0.603135	-3.02725	0.00246786	0.136047
KMT2A	Colorectal Cancer	factor(sample_subtypes)Rectal Adenocarcinoma	-0.665042	0.219903	-3.02424	0.00249255	0.136862
IRF4	Colorectal Cancer	factor(sample_status)1	-1.04849	0.347252	-3.01939	0.00253288	0.138766
MAP2K1	Colorectal Cancer	factor(aya_status)1	0.77778	0.331431	2.34673	0.0189388	0.427381
CDH1	Esophagogastric Cancer	factor(sample_subtypes)Stomach Adenocarcinoma	1.48327	0.491729	3.01644	0.00255761	0.139808
EGFR	Non-Small Cell Lung Cancer	factor(sample_subtypes)Non-Small Cell Lung Cancer	1.97208	0.654058	3.01515	0.00256852	0.140093
HIST1H1C	Non-Small Cell Lung Cancer	factor(sample_subtypes)Lung Squamous Cell Carcinoma	-1.67975	0.557579	-3.01258	0.00259037	0.140972
NFE2L2	Endometrial Cancer	factor(sample_subtypes)Uterine Carcinosarcoma/Uterine Malignant Mixed Mullerian Tumor	-3.19953	1.06376	-3.00775	0.00263189	0.142598
DDR2	Endometrial Cancer	factor(sample_status)1	-1.44202	0.480463	-3.00131	0.00268817	0.144057
AR	Endometrial Cancer	factor(sample_subtypes)Uterine Carcinosarcoma/Uterine Malignant Mixed Mullerian Tumor	-3.19457	1.06422	-3.0018	0.00268388	0.144057
MSH2	Bladder Cancer	factor(sample_subtypes)Upper Tract Urothelial Carcinoma	1.01095	0.336828	3.00138	0.00268759	0.144057
FAT1	Melanoma	factor(aya_status)1	-1.01625	0.433223	-2.34578	0.0189871	0.427381
SMAD2	Colorectal Cancer	factor(sample_status)1	-0.613127	0.204158	-3.00319	0.00267166	0.144057
MTOR	Colorectal Cancer	factor(sample_subtypes)Rectal Adenocarcinoma	-0.657003	0.219133	-2.9982	0.0027158	0.145222
JAK1	Breast Cancer	factor(sample_status)1	1.15029	0.384201	2.99398	0.0027536	0.146152
NOTCH2	Colorectal Cancer	factor(sample_status)1	-0.776058	0.259353	-2.99229	0.00276893	0.146152
NKX3-1	Endometrial Cancer	factor(aya_status)1	1.88847	0.810806	2.32913	0.0198521	0.43754
DICER1	Colorectal Cancer	factor(sample_subtypes)Rectal Adenocarcinoma	-1.06996	0.357533	-2.99263	0.00276586	0.146152
IKBKE	Non-Small Cell Lung Cancer	factor(sample_subtypes)Lung Adenocarcinoma	-1.88127	0.62838	-2.99384	0.00275489	0.146152
AXIN1	Colorectal Cancer	factor(sample_status)1	-0.77945	0.260438	-2.99284	0.00276392	0.146152
MGA	Gastrointestinal Stromal Tumor	factor(sample_status)1	1.46872	0.490558	2.99398	0.00275364	0.146152
IRS1	Colorectal Cancer	factor(aya_status)1	0.538251	0.232229	2.31776	0.0204626	0.444424
PDGFRA	Non-Small Cell Lung Cancer	factor(sample_all$sex)Male	0.438356	0.146717	2.98776	0.0028103	0.148017
DDR2	Non-Small Cell Lung Cancer	factor(sample_subtypes)Lung Squamous Cell Carcinoma	-1.39211	0.466974	-2.98113	0.00287188	0.150064
SMARCA4	Non-Small Cell Lung Cancer	factor(sample_status)1	0.313283	0.10507	2.98166	0.00286686	0.150064
PMS2	Endometrial Cancer	factor(sample_subtypes)Uterine Endometrioid Carcinoma	-2.15149	0.721728	-2.98102	0.00287288	0.150064
RBM10	Non-Small Cell Lung Cancer	factor(aya_status)1	-1.65678	0.717103	-2.31038	0.020867	0.448843
FUBP1	Endometrial Cancer	factor(sample_subtypes)Uterine Carcinosarcoma/Uterine Malignant Mixed Mullerian Tumor	-3.81288	1.27908	-2.98094	0.00287361	0.150064
BAP1	Hepatobiliary Cancer	factor(sample_subtypes)Intrahepatic Cholangiocarcinoma	3.02229	1.01443	2.97929	0.00288914	0.150554
NOTCH3	Colorectal Cancer	factor(sample_subtypes)Rectal Adenocarcinoma	-0.550193	0.184718	-2.97856	0.00289605	0.150575
EPHB1	Melanoma	factor(sample_all$sex)Male	0.866579	0.290998	2.97795	0.0029018	0.150575
KDM5A	Non-Small Cell Lung Cancer	factor(sample_subtypes)Lung Adenocarcinoma	-1.42993	0.480413	-2.97647	0.00291589	0.150987
PTPRS	Endometrial Cancer	factor(sample_subtypes)Uterine Carcinosarcoma/Uterine Malignant Mixed Mullerian Tumor	-3.78464	1.27245	-2.9743	0.00293656	0.151523
CBL	Colorectal Cancer	factor(aya_status)1	0.834691	0.361525	2.30881	0.0209543	0.449173
PIK3R3	Breast Cancer	factor(sample_all$sex)Male	2.56535	0.862828	2.97318	0.00294727	0.151652
FBXW7	Bladder Cancer	factor(sample_status)1	-0.931699	0.313561	-2.97135	0.00296491	0.151976
ATRX	Colorectal Cancer	factor(sample_status)1	-0.565223	0.190509	-2.9669	0.00300817	0.151976
TET2	Endometrial Cancer	factor(sample_subtypes)Uterine Serous Carcinoma/Uterine Papillary Serous Carcinoma	-2.77482	0.935034	-2.96761	0.00300126	0.151976
PBRM1	Non-Small Cell Lung Cancer	factor(sample_all$sex)Male	0.519528	0.174935	2.96984	0.00297954	0.151976
SOX9	Bladder Cancer	factor(aya_status)1	1.78611	0.779274	2.29202	0.0219047	0.463473
ARID1B	Endometrial Cancer	factor(sample_subtypes)Uterine Carcinosarcoma/Uterine Malignant Mixed Mullerian Tumor	-3.77399	1.27096	-2.96939	0.00298391	0.151976
GATA1	Non-Small Cell Lung Cancer	factor(sample_all$sex)Male	-1.12029	0.37761	-2.96679	0.0030093	0.151976
HGF	Melanoma	factor(sample_all$sex)Male	0.747348	0.251822	2.96776	0.00299974	0.151976
FAT1	Head and Neck Cancer	factor(sample_subtypes)Oropharynx Squamous Cell Carcinoma	-1.259	0.424303	-2.96722	0.00300507	0.151976
NTRK3	Colorectal Cancer	factor(sample_status)1	-0.749448	0.252803	-2.96455	0.0030313	0.15246
SYK	Melanoma	factor(sample_all$sex)Male	0.945411	0.318888	2.96471	0.00302968	0.15246
TET2	Endometrial Cancer	factor(sample_subtypes)Uterine Carcinosarcoma/Uterine Malignant Mixed Mullerian Tumor	-3.77369	1.27417	-2.96168	0.00305963	0.15357
CDH1	Endometrial Cancer	factor(aya_status)1	1.29442	0.566654	2.28433	0.0223521	0.470102
ATM	Endometrial Cancer	factor(sample_subtypes)Uterine Serous Carcinoma/Uterine Papillary Serous Carcinoma	-2.67867	0.905791	-2.95727	0.00310371	0.154206
CBL	Endometrial Cancer	factor(sample_subtypes)Uterine Carcinosarcoma/Uterine Malignant Mixed Mullerian Tumor	-3.78831	1.28071	-2.95798	0.00309663	0.154206
ESR1	Melanoma	factor(sample_all$sex)Male	1.57831	0.533684	2.95738	0.00310265	0.154206
RUNX1	Colorectal Cancer	factor(sample_status)1	-1.21072	0.409078	-2.95964	0.00308004	0.154206
EED	Non-Small Cell Lung Cancer	factor(sample_subtypes)Lung Adenocarcinoma	-1.86423	0.630388	-2.95728	0.00310367	0.154206
CREBBP	Non-Small Cell Lung Cancer	factor(sample_status)1	0.432462	0.146286	2.95627	0.00311386	0.154397
RAD52	Non-Small Cell Lung Cancer	factor(sample_status)1	1.92398	0.65119	2.95455	0.00313121	0.154944
BLM	Colorectal Cancer	factor(sample_subtypes)Rectal Adenocarcinoma	-1.01053	0.342419	-2.95115	0.0031659	0.156346
TP53	Breast Cancer	factor(aya_status)1	0.281846	0.123453	2.28303	0.0224285	0.471145
SH2B3	Colorectal Cancer	factor(sample_status)1	-0.851232	0.288773	-2.94776	0.0032009	0.157757
APC	Non-Small Cell Lung Cancer	factor(sample_subtypes)Lung Adenocarcinoma	-0.974325	0.330665	-2.94656	0.00321326	0.158049
GATA2	Non-Small Cell Lung Cancer	factor(sample_subtypes)Lung Adenocarcinoma	-1.59096	0.540101	-2.94568	0.0032225	0.158186
MLH1	Colorectal Cancer	factor(sample_status)1	-0.853723	0.289909	-2.9448	0.00323165	0.158319
EP300	Melanoma	factor(sample_all$sex)Male	0.930863	0.316251	2.94343	0.00324601	0.158705
TSC1	Endometrial Cancer	factor(sample_subtypes)Uterine Carcinosarcoma/Uterine Malignant Mixed Mullerian Tumor	-2.90722	0.990551	-2.93495	0.003336	0.162136
SMARCA4	Colorectal Cancer	factor(sample_subtypes)Rectal Adenocarcinoma	-0.644733	0.219648	-2.9353	0.00333223	0.162136
KMT2A	Colorectal Cancer	factor(aya_status)1	0.476079	0.20862	2.28204	0.0224867	0.471722
CSDE1	Endometrial Cancer	factor(sample_subtypes)Uterine Carcinosarcoma/Uterine Malignant Mixed Mullerian Tumor	-3.79422	1.29268	-2.93517	0.00333363	0.162136
INPP4A	Non-Small Cell Lung Cancer	factor(sample_all$sex)Male	0.726265	0.247948	2.9291	0.00339941	0.164567
PTEN	Gastrointestinal Stromal Tumor	factor(sample_status)1	2.25868	0.771357	2.92819	0.00340936	0.164723
AR	Endometrial Cancer	factor(sample_subtypes)Uterine Serous Carcinoma/Uterine Papillary Serous Carcinoma	-2.66984	0.911977	-2.92753	0.00341669	0.164753
PIK3R3	Endometrial Cancer	factor(sample_subtypes)Uterine Endometrioid Carcinoma	-2.57278	0.879047	-2.92678	0.00342491	0.164826
FGFR4	Endometrial Cancer	factor(sample_subtypes)Uterine Carcinosarcoma/Uterine Malignant Mixed Mullerian Tumor	-2.94233	1.00595	-2.92491	0.00344551	0.165493
MAP3K1	Colorectal Cancer	factor(aya_status)1	0.577324	0.253196	2.28014	0.0225991	0.47247
KIT	Gastrointestinal Stromal Tumor	factor(sample_all$sex)Male	0.653835	0.223678	2.92311	0.0034655	0.165723
SPEN	Colorectal Cancer	factor(sample_status)1	-0.534295	0.182821	-2.92251	0.00347221	0.165723
PIK3C3	Colorectal Cancer	factor(sample_status)1	-1.0666	0.365006	-2.92215	0.00347619	0.165723
PTPRD	Colorectal Cancer	factor(sample_subtypes)Rectal Adenocarcinoma	-0.778091	0.266282	-2.92205	0.00347733	0.165723
SPEN	Breast Cancer	factor(aya_status)1	-2.2942	1.00884	-2.27411	0.0229596	0.475144
SDHB	Non-Small Cell Lung Cancer	factor(sample_subtypes)Lung Squamous Cell Carcinoma	-3.29529	1.12847	-2.92015	0.00349861	0.166414
FANCC	Colorectal Cancer	factor(sample_status)1	-1.7639	0.604606	-2.91744	0.00352921	0.167545
MET	Non-Small Cell Lung Cancer	factor(sample_subtypes)Lung Squamous Cell Carcinoma	-1.32486	0.454496	-2.91501	0.00355677	0.167557
ARID2	Endometrial Cancer	factor(sample_subtypes)Uterine Carcinosarcoma/Uterine Malignant Mixed Mullerian Tumor	-3.71439	1.27418	-2.91512	0.00355553	0.167557
TEK	Colorectal Cancer	factor(aya_status)1	0.720681	0.31835	2.2638	0.0235862	0.483221
PAK7	Colorectal Cancer	factor(sample_subtypes)Rectal Adenocarcinoma	-1.37328	0.470912	-2.91623	0.00354294	0.167557
FYN	Non-Small Cell Lung Cancer	factor(sample_all$sex)Male	0.959257	0.32899	2.91576	0.00354823	0.167557
GNAS	Hepatobiliary Cancer	factor(sample_status)1	2.02308	0.694393	2.91344	0.00357467	0.168012
FLCN	Colorectal Cancer	factor(sample_all$sex)Male	-0.574963	0.197381	-2.91297	0.00358012	0.168012
BTK	Non-Small Cell Lung Cancer	factor(sample_all$sex)Male	-0.681833	0.234375	-2.90916	0.00362402	0.169748
SF3B1	Colorectal Cancer	factor(sample_all$sex)Male	0.777242	0.267286	2.90791	0.00363854	0.170104
EPHA3	Melanoma	factor(sample_all$sex)Male	0.654767	0.225248	2.90688	0.00365057	0.170341
DNMT1	Colorectal Cancer	factor(aya_status)1	0.560024	0.247465	2.26304	0.0236331	0.483614
NFE2L2	Non-Small Cell Lung Cancer	factor(sample_subtypes)Lung Squamous Cell Carcinoma	1.74214	0.600052	2.90331	0.0036924	0.171641
KIT	Non-Small Cell Lung Cancer	factor(sample_subtypes)Lung Adenocarcinoma	-1.27656	0.439905	-2.90191	0.00370897	0.172074
TP53	Melanoma	factor(sample_subtypes)Melanoma of Unknown Primary	1.12646	0.388364	2.90053	0.00372535	0.172074
FAT1	Endometrial Cancer	factor(sample_subtypes)Uterine Carcinosarcoma/Uterine Malignant Mixed Mullerian Tumor	-2.22155	0.766011	-2.90016	0.00372977	0.172074
CREBBP	Bladder Cancer	factor(sample_all$sex)Male	0.574012	0.198107	2.89748	0.00376173	0.172582
TSC1	Colorectal Cancer	factor(sample_status)1	-0.86412	0.298233	-2.89747	0.00376187	0.172582
ARID5B	Colorectal Cancer	factor(sample_subtypes)Rectal Adenocarcinoma	-1.03949	0.358928	-2.8961	0.00377838	0.173016
MYC	Ovarian Cancer	factor(aya_status)1	2.54368	1.12686	2.25732	0.023988	0.488599
RAF1	Colorectal Cancer	factor(sample_all$sex)Male	0.813113	0.281004	2.8936	0.00380858	0.173122
STAT3	Colorectal Cancer	factor(sample_status)1	-1.18578	0.409748	-2.89393	0.00380457	0.173122
TGFBR2	Endometrial Cancer	factor(sample_subtypes)Uterine Carcinosarcoma/Uterine Malignant Mixed Mullerian Tumor	-3.09847	1.07081	-2.89357	0.0038089	0.173122
RPS6KA4	Non-Small Cell Lung Cancer	factor(sample_subtypes)Lung Adenocarcinoma	-1.55944	0.538682	-2.89491	0.00379263	0.173122
MTOR	Hepatobiliary Cancer	factor(aya_status)1	1.95686	0.867551	2.25561	0.0240951	0.489101
TP53	Bladder Cancer	factor(sample_subtypes)Upper Tract Urothelial Carcinoma	-0.434238	0.150253	-2.89005	0.00385185	0.174428
SPEN	Breast Cancer	factor(sample_subtypes)Invasive Breast Carcinoma	-2.38661	0.825686	-2.89045	0.00384688	0.174428
CIC	Breast Cancer	factor(sample_status)1	1.11687	0.386673	2.8884	0.00387202	0.175018
ERBB3	Hepatobiliary Cancer	factor(sample_subtypes)Hepatocellular Carcinoma	-2.29164	0.793895	-2.88658	0.00389459	0.175215
HIST1H3B	Non-Small Cell Lung Cancer	factor(aya_status)1	1.38886	0.616695	2.2521	0.0243158	0.4912
RNF43	Hepatobiliary Cancer	factor(sample_subtypes)Intrahepatic Cholangiocarcinoma	-2.41206	0.835689	-2.88632	0.00389779	0.175215
RPTOR	Non-Small Cell Lung Cancer	factor(sample_subtypes)Lung Adenocarcinoma	-1.38439	0.479606	-2.88651	0.0038954	0.175215
HNF1A	Colorectal Cancer	factor(sample_subtypes)Rectal Adenocarcinoma	-0.871501	0.30202	-2.88557	0.00390706	0.175311
YES1	Endometrial Cancer	factor(sample_subtypes)Uterine Carcinosarcoma/Uterine Malignant Mixed Mullerian Tumor	-3.68889	1.2791	-2.88397	0.00392692	0.17588
CTCF	Hepatobiliary Cancer	factor(aya_status)1	2.06722	0.919666	2.24779	0.0245893	0.49408
EPHB1	Non-Small Cell Lung Cancer	factor(sample_subtypes)Lung Adenocarcinoma	-1.10168	0.382255	-2.88207	0.00395072	0.176624
BRCA2	Endometrial Cancer	factor(sample_subtypes)Uterine Carcinosarcoma/Uterine Malignant Mixed Mullerian Tumor	-2.82275	0.980238	-2.87966	0.00398102	0.177495
PIK3C2G	Melanoma	factor(sample_subtypes)Cutaneous Melanoma	2.91933	1.01388	2.87937	0.00398468	0.177495
TP53	Hepatobiliary Cancer	factor(sample_subtypes)Gallbladder Adenocarcinoma, NOS	1.02877	0.357606	2.87681	0.00401715	0.178617
STAT5B	Colorectal Cancer	factor(sample_status)1	-0.957723	0.333296	-2.87349	0.00405961	0.180179
AURKB	Non-Small Cell Lung Cancer	factor(sample_subtypes)Lung Adenocarcinoma	-2.30337	0.80186	-2.87254	0.00407189	0.180398
ERBB4	Melanoma	factor(aya_status)1	-0.81926	0.364614	-2.24693	0.0246447	0.494587
CDK12	Breast Cancer	factor(sample_subtypes)Breast Invasive Ductal Carcinoma	-2.2514	0.785036	-2.8679	0.00413211	0.182736
EGFL7	Colorectal Cancer	factor(sample_subtypes)others	3.19458	1.11738	2.85899	0.00424998	0.187274
ABL1	Melanoma	factor(sample_all$sex)Male	1.38651	0.48517	2.85777	0.00426627	0.187655
PDGFRA	Breast Cancer	factor(sample_status)1	0.991004	0.347024	2.85572	0.0042939	0.188414
CCND1	Non-Small Cell Lung Cancer	factor(sample_all$sex)Male	1.64222	0.575137	2.85535	0.00429889	0.188414
NKX2-1	Melanoma	factor(aya_status)1	1.18508	0.531966	2.22774	0.025898	0.506083
CD79B	Colorectal Cancer	factor(sample_all$sex)Male	1.7731	0.621428	2.85327	0.00432718	0.189128
BTK	Endometrial Cancer	factor(sample_subtypes)Uterine Carcinosarcoma/Uterine Malignant Mixed Mullerian Tumor	-3.03811	1.06528	-2.85193	0.00434542	0.189128
RAD50	Colorectal Cancer	factor(sample_subtypes)Rectal Adenocarcinoma	-1.08105	0.379006	-2.85234	0.0043399	0.189128
PARP1	Breast Cancer	factor(sample_status)1	1.23293	0.43232	2.85189	0.004346	0.189128
ATM	Hepatobiliary Cancer	factor(sample_status)1	-1.15768	0.406027	-2.85125	0.00435484	0.189177
FOXP1	Melanoma	factor(sample_all$sex)Male	1.19383	0.419238	2.84763	0.00440461	0.191001
TBX3	Colorectal Cancer	factor(sample_status)1	-0.691192	0.242916	-2.8454	0.00443563	0.192007
DICER1	Ovarian Cancer	factor(aya_status)1	2.21611	0.997852	2.22088	0.026359	0.509942
RPS6KA4	Breast Cancer	factor(sample_all$sex)Male	2.38858	0.839694	2.84458	0.00444695	0.192158
IRS2	Colorectal Cancer	factor(sample_all$sex)Male	0.562607	0.197923	2.84256	0.00447532	0.19282
PREX2	Melanoma	factor(sample_subtypes)Melanoma of Unknown Primary	2.16397	0.76142	2.84202	0.00448288	0.19282
TRAF2	Colorectal Cancer	factor(sample_status)1	-1.50552	0.529777	-2.84181	0.00448583	0.19282
BRCA2	Colorectal Cancer	factor(sample_subtypes)Rectal Adenocarcinoma	-0.576346	0.202938	-2.84001	0.00451114	0.193569
PTPN11	Bladder Cancer	factor(sample_subtypes)Upper Tract Urothelial Carcinoma	1.61146	0.568764	2.83327	0.00460745	0.197013
HGF	Esophagogastric Cancer	factor(sample_status)1	1.33812	0.472397	2.83263	0.00461674	0.197067
RNF43	Colorectal Cancer	factor(sample_subtypes)Colorectal Adenocarcinoma	-0.587478	0.207584	-2.83008	0.0046537	0.198299
IL7R	Melanoma	factor(aya_status)1	-1.32274	0.598713	-2.2093	0.0271539	0.518337
NRAS	Melanoma	factor(sample_subtypes)Cutaneous Melanoma	0.965136	0.341104	2.82945	0.00466283	0.198344
TP53	Esophagogastric Cancer	factor(sample_subtypes)Esophageal Adenocarcinoma	0.611157	0.21628	2.82577	0.00471669	0.19962
STK11	Endometrial Cancer	factor(sample_subtypes)Uterine Carcinosarcoma/Uterine Malignant Mixed Mullerian Tumor	-3.61174	1.27841	-2.82518	0.00472535	0.19962
CDK12	Breast Cancer	factor(sample_subtypes)Breast Invasive Lobular Carcinoma	-2.58131	0.913536	-2.82562	0.00471891	0.19962
MAP2K4	Pancreatic Cancer	factor(sample_status)1	1.09758	0.388598	2.82446	0.00473609	0.19973
PBRM1	Hepatobiliary Cancer	factor(sample_subtypes)Intrahepatic Cholangiocarcinoma	2.07153	0.73389	2.82268	0.00476248	0.199813
NOTCH3	Melanoma	factor(sample_all$sex)Male	0.576547	0.204219	2.82318	0.00475506	0.199813
CCND1	Colorectal Cancer	factor(aya_status)1	1.16973	0.53038	2.20545	0.0274226	0.519689
PLK2	Colorectal Cancer	factor(sample_subtypes)Rectal Adenocarcinoma	-1.22724	0.434678	-2.82333	0.00475279	0.199813
NSD1	Endometrial Cancer	factor(sample_status)1	-0.81866	0.290258	-2.82046	0.00479556	0.200857
KRAS	Ovarian Cancer	factor(sample_subtypes)Low-Grade Serous Ovarian Cancer	1.16734	0.414297	2.81763	0.00483792	0.201257
SMAD4	Colorectal Cancer	factor(sample_subtypes)Colorectal Adenocarcinoma	0.371715	0.131903	2.81809	0.00483102	0.201257
FGFR4	Colorectal Cancer	factor(sample_subtypes)Rectal Adenocarcinoma	-1.14032	0.404503	-2.81906	0.00481644	0.201257
TGFBR1	Esophagogastric Cancer	factor(sample_status)1	1.79259	0.636153	2.81786	0.00483453	0.201257
KMT2D	Melanoma	factor(aya_status)1	-0.802627	0.363853	-2.20591	0.0273901	0.519689
TP53	Non-Small Cell Lung Cancer	factor(sample_all$sex)Male	0.162653	0.0577892	2.8146	0.00488377	0.202821
ARAF	Melanoma	factor(sample_all$sex)Male	-1.33514	0.475067	-2.81043	0.0049476	0.205041
FLT4	Non-Small Cell Lung Cancer	factor(sample_subtypes)Lung Squamous Cell Carcinoma	-1.2679	0.451262	-2.80968	0.00495904	0.205041
NOTCH4	Melanoma	factor(sample_subtypes)Cutaneous Melanoma	2.85141	1.01493	2.80947	0.00496229	0.205041
TET2	Colorectal Cancer	factor(aya_status)1	0.546617	0.24831	2.20135	0.0277114	0.521346
PGR	Non-Small Cell Lung Cancer	factor(sample_subtypes)Lung Adenocarcinoma	-1.23125	0.439371	-2.80231	0.00507381	0.209297
ERBB2	Bladder Cancer	factor(sample_all$sex)Male	0.630258	0.225068	2.8003	0.00510547	0.209309
IDH2	Colorectal Cancer	factor(sample_status)1	-1.48893	0.5318	-2.7998	0.00511351	0.209309
DDR2	Colorectal Cancer	factor(sample_status)1	-1.02205	0.364973	-2.80033	0.00510501	0.209309
EP300	Non-Small Cell Lung Cancer	factor(sample_status)1	0.495876	0.177124	2.79959	0.00511674	0.209309
SUFU	Colorectal Cancer	factor(sample_status)1	-1.48481	0.53005	-2.80126	0.0050903	0.209309
TAP1	Colorectal Cancer	factor(sample_subtypes)Rectal Adenocarcinoma	-2.03765	0.728044	-2.7988	0.00512935	0.209475
PTPRS	Melanoma	factor(aya_status)1	-2.22953	1.01333	-2.20021	0.027792	0.521487
TERT	Colorectal Cancer	factor(sample_status)1	-0.7257	0.259432	-2.79726	0.00515376	0.210005
SRC	Melanoma	factor(sample_all$sex)Male	1.70808	0.611511	2.79321	0.00521875	0.212068
ERCC5	Colorectal Cancer	factor(sample_status)1	-0.768022	0.27532	-2.78956	0.00527793	0.213264
TET1	Endometrial Cancer	factor(sample_status)1	-1.04491	0.374527	-2.78994	0.00527177	0.213264
MET	Esophagogastric Cancer	factor(aya_status)1	1.5315	0.70236	2.18051	0.0292199	0.536625
PALB2	Breast Cancer	factor(sample_status)1	1.14445	0.410423	2.78845	0.00529603	0.213441
LATS1	Colorectal Cancer	factor(sample_subtypes)Rectal Adenocarcinoma	-0.955326	0.343047	-2.78482	0.00535569	0.215492
TP53	Head and Neck Cancer	factor(sample_status)1	-0.597812	0.214775	-2.78344	0.00537856	0.215921
HGF	Colorectal Cancer	factor(sample_all$sex)Male	0.687873	0.247159	2.78312	0.00538395	0.215921
ASXL1	Hepatobiliary Cancer	factor(aya_status)1	1.3728	0.629709	2.18005	0.0292538	0.536625
KDM5A	Breast Cancer	factor(sample_subtypes)Breast Invasive Lobular Carcinoma	-2.54461	0.916757	-2.77566	0.0055089	0.220213
CARD11	Breast Cancer	factor(sample_status)1	0.909946	0.327996	2.77426	0.00553282	0.220809
TERT	Breast Cancer	factor(sample_status)1	1.13311	0.408534	2.7736	0.00554399	0.220896
TAP2	Colorectal Cancer	factor(sample_status)1	-1.45888	0.52611	-2.77296	0.00555497	0.220974
KRAS	Endometrial Cancer	factor(aya_status)1	-1.60149	0.736579	-2.17423	0.0296881	0.541685
MDM2	Non-Small Cell Lung Cancer	factor(sample_status)1	0.88089	0.317848	2.77142	0.00558122	0.221659
IGF2	Non-Small Cell Lung Cancer	factor(sample_subtypes)Lung Squamous Cell Carcinoma	-2.43907	0.880495	-2.77011	0.0056037	0.222193
EGFR	Bladder Cancer	factor(sample_subtypes)others	2.34853	0.848321	2.76845	0.00563241	0.222922
RECQL	Bladder Cancer	factor(sample_subtypes)others	3.23629	1.16918	2.76799	0.00564026	0.222922
KMT2C	Melanoma	factor(sample_subtypes)Cutaneous Melanoma	2.01319	0.728086	2.76505	0.00569146	0.224223
TP53BP1	Colorectal Cancer	factor(sample_status)1	-0.84131	0.304263	-2.76508	0.00569094	0.224223
SPOP	Colorectal Cancer	factor(aya_status)1	1.04406	0.480468	2.173	0.0297806	0.541711
LATS1	Colorectal Cancer	factor(sample_status)1	-0.75917	0.27462	-2.76443	0.00570218	0.224286
TP53BP1	Breast Cancer	factor(sample_status)1	1.32306	0.478904	2.76269	0.00573275	0.225127
STAG2	Endometrial Cancer	factor(sample_subtypes)Uterine Carcinosarcoma/Uterine Malignant Mixed Mullerian Tumor	-2.60627	0.94395	-2.76103	0.00576193	0.225813
KMT2B	Colorectal Cancer	factor(sample_subtypes)Rectal Adenocarcinoma	-0.526458	0.190701	-2.76065	0.0057686	0.225813
KMT2C	Melanoma	factor(sample_subtypes)Melanoma of Unknown Primary	2.08742	0.757046	2.75732	0.00582779	0.227404
YES1	Colorectal Cancer	factor(aya_status)1	0.941792	0.436051	2.15982	0.0307865	0.550661
ANKRD11	Ovarian Cancer	factor(sample_subtypes)High-Grade Serous Ovarian Cancer	-1.68848	0.612525	-2.75659	0.00584071	0.227547
BCL6	Colorectal Cancer	factor(sample_status)1	-1.06784	0.387502	-2.7557	0.00585667	0.227807
INPPL1	Colorectal Cancer	factor(sample_subtypes)Rectal Adenocarcinoma	-0.790071	0.286799	-2.75479	0.00587301	0.228081
FYN	Colorectal Cancer	factor(sample_status)1	-1.21502	0.441326	-2.7531	0.00590334	0.228482
FGFR3	Bladder Cancer	factor(sample_status)1	-0.449267	0.163325	-2.75076	0.00594569	0.229451
FAT1	Melanoma	factor(sample_subtypes)Melanoma of Unknown Primary	2.83624	1.03223	2.74769	0.00600169	0.230908
PIK3CB	Breast Cancer	factor(sample_status)1	1.11474	0.405707	2.74766	0.00600225	0.230908
PTPRD	Non-Small Cell Lung Cancer	factor(aya_status)1	-2.1683	1.0072	-2.15281	0.031334	0.555
ZFHX3	Breast Cancer	factor(sample_status)1	0.75659	0.275412	2.74712	0.00601203	0.230922
CSF1R	Colorectal Cancer	factor(sample_status)1	-0.851731	0.310221	-2.74556	0.00604076	0.230942
FGF3	Bladder Cancer	factor(sample_subtypes)others	3.18319	1.15928	2.74583	0.00603583	0.230942
SOS1	Breast Cancer	factor(sample_status)1	1.45734	0.530764	2.74573	0.00603758	0.230942
PLK2	Breast Cancer	factor(sample_status)1	1.0712	0.390335	2.74431	0.00606389	0.231465
SETD2	Colorectal Cancer	factor(sample_subtypes)Rectal Adenocarcinoma	-0.62938	0.229384	-2.74378	0.00607356	0.231474
ICOSLG	Colorectal Cancer	factor(sample_status)1	-2.78876	1.01696	-2.74225	0.00610195	0.231836
VHL	Renal Cell Carcinoma	factor(sample_subtypes)Renal Clear Cell Carcinoma	3.03042	1.10587	2.7403	0.00613836	0.232141
MAPK3	Breast Cancer	factor(aya_status)1	1.55642	0.723238	2.15201	0.0313965	0.555
ASXL1	Colorectal Cancer	factor(sample_subtypes)Rectal Adenocarcinoma	-0.626354	0.228541	-2.74066	0.00613152	0.232141
NF1	Soft Tissue Sarcoma	factor(sample_subtypes)Undifferentiated Pleomorphic Sarcoma/Malignant Fibrous Histiocytoma/High-Grade Spindle Cell Sarcoma	2.11794	0.772716	2.74091	0.00612696	0.232141
EGFR	Non-Small Cell Lung Cancer	factor(sample_subtypes)others	1.8384	0.671978	2.7358	0.00622296	0.233899
PIK3CA	Esophagogastric Cancer	factor(sample_all$sex)Male	1.04412	0.381578	2.73632	0.00621309	0.233899
RET	Breast Cancer	factor(sample_all$sex)Male	2.23653	0.817255	2.73663	0.00620722	0.233899
SPEN	Breast Cancer	factor(sample_subtypes)Breast Invasive Lobular Carcinoma	-1.74433	0.637543	-2.73602	0.00621875	0.233899
RFWD2	Breast Cancer	factor(sample_status)1	1.31237	0.479932	2.7345	0.00624759	0.234466
ESR1	Breast Cancer	factor(aya_status)1	-0.622492	0.289528	-2.15002	0.0315533	0.555154
DIS3	Non-Small Cell Lung Cancer	factor(sample_all$sex)Male	0.573598	0.209908	2.73262	0.00628323	0.234532
CBFB	Breast Cancer	factor(sample_subtypes)Breast Invasive Ductal Carcinoma	-1.78437	0.653785	-2.72929	0.00634717	0.234532
ARID1B	Breast Cancer	factor(sample_status)1	0.793668	0.290705	2.73015	0.0063305	0.234532
KDM5A	Colorectal Cancer	factor(sample_subtypes)Rectal Adenocarcinoma	-0.754967	0.276301	-2.73241	0.00628723	0.234532
NSD1	Colorectal Cancer	factor(sample_status)1	-0.606287	0.222042	-2.73051	0.00632365	0.234532
BTK	Colorectal Cancer	factor(sample_status)1	-1.20878	0.442564	-2.73131	0.00630823	0.234532
SETD2	Renal Cell Carcinoma	factor(aya_status)1	-2.20672	1.02949	-2.1435	0.0320727	0.559413
PIK3CG	Breast Cancer	factor(sample_subtypes)Breast Invasive Ductal Carcinoma	-2.14445	0.785557	-2.72985	0.00633635	0.234532
RBM10	Non-Small Cell Lung Cancer	factor(sample_subtypes)Lung Squamous Cell Carcinoma	-1.13703	0.416487	-2.73004	0.00633266	0.234532
NCOA3	Melanoma	factor(sample_all$sex)Male	0.932154	0.341585	2.72891	0.00635446	0.234532
PIK3R3	Breast Cancer	factor(sample_status)1	1.79871	0.658412	2.73189	0.00629713	0.234532
SUFU	Colorectal Cancer	factor(aya_status)1	0.823781	0.384435	2.14284	0.0321262	0.559621
RECQL	Colorectal Cancer	factor(sample_status)1	-1.13018	0.413836	-2.73097	0.0063148	0.234532
ARID2	Melanoma	factor(sample_subtypes)Cutaneous Melanoma	1.98609	0.728696	2.72554	0.00641956	0.236224
SPOP	Ovarian Cancer	factor(sample_subtypes)Low-Grade Serous Ovarian Cancer	-2.87338	1.05424	-2.72554	0.00641956	0.236224
PTPN11	Bladder Cancer	factor(sample_subtypes)others	3.16455	1.16245	2.72231	0.00648267	0.237478
CDH1	Colorectal Cancer	factor(sample_status)1	-0.845069	0.310374	-2.72274	0.00647426	0.237478
RNF43	Endometrial Cancer	factor(sample_subtypes)Uterine Carcinosarcoma/Uterine Malignant Mixed Mullerian Tumor	-2.54963	0.936909	-2.72132	0.00650222	0.23784
ETV6	Non-Small Cell Lung Cancer	factor(sample_all$sex)Male	-1.02319	0.37607	-2.72074	0.00651368	0.237905
FGFR1	Breast Cancer	factor(aya_status)1	1.12003	0.524394	2.13585	0.0326915	0.562014
RICTOR	Breast Cancer	factor(sample_status)1	0.891726	0.327858	2.71985	0.00653114	0.238188
EZH2	Breast Cancer	factor(sample_all$sex)Male	2.24044	0.824198	2.71832	0.00656142	0.238937
AKT3	Colorectal Cancer	factor(sample_all$sex)Male	0.954715	0.351545	2.71577	0.00661221	0.24043
NRAS	Ovarian Cancer	factor(sample_subtypes)Low-Grade Serous Ovarian Cancer	2.88189	1.06231	2.71286	0.00667061	0.24148
IKZF1	Breast Cancer	factor(sample_status)1	1.22854	0.452754	2.71349	0.00665783	0.24148
GATA2	Colorectal Cancer	factor(sample_status)1	-0.951786	0.350795	-2.71323	0.00666315	0.24148
MYCN	Colorectal Cancer	factor(sample_status)1	-0.998294	0.368174	-2.71148	0.00669842	0.241778
SETD2	Colorectal Cancer	factor(aya_status)1	0.484286	0.226855	2.13478	0.0327787	0.562014
INPP4A	Breast Cancer	factor(sample_status)1	1.41258	0.520965	2.71147	0.00669853	0.241778
EPHA3	Breast Cancer	factor(sample_all$sex)Male	2.2421	0.827526	2.7094	0.0067405	0.242935
APC	Colorectal Cancer	factor(sample_subtypes)others	-1.8766	0.693318	-2.7067	0.00679551	0.243334
KEAP1	Non-Small Cell Lung Cancer	factor(sample_status)1	0.221592	0.0818763	2.70643	0.00680114	0.243334
BRD4	Colorectal Cancer	factor(aya_status)1	0.537828	0.252363	2.13117	0.0330755	0.562014
PIK3CD	Colorectal Cancer	factor(sample_subtypes)Rectal Adenocarcinoma	-0.971796	0.358911	-2.70763	0.00677662	0.243334
RPS6KA4	Endometrial Cancer	factor(sample_subtypes)Uterine Carcinosarcoma/Uterine Malignant Mixed Mullerian Tumor	-2.65765	0.981919	-2.70659	0.00679783	0.243334
HIST1H3H	Bladder Cancer	factor(sample_subtypes)others	3.25289	1.20143	2.70753	0.00677868	0.243334
MSH3	Endometrial Cancer	factor(sample_subtypes)Uterine Carcinosarcoma/Uterine Malignant Mixed Mullerian Tumor	-3.4525	1.2761	-2.70551	0.00682001	0.243425
RECQL4	Colorectal Cancer	factor(aya_status)1	0.56685	0.265831	2.13237	0.0329761	0.562014
RRAGC	Endometrial Cancer	factor(sample_subtypes)Uterine Endometrioid Carcinoma	-3.43578	1.27	-2.70534	0.00682352	0.243425
TP53	Head and Neck Cancer	factor(sample_subtypes)Larynx Squamous Cell Carcinoma	1.3427	0.496469	2.7045	0.00684071	0.243684
IL7R	Breast Cancer	factor(sample_subtypes)Breast Invasive Ductal Carcinoma	-3.11351	1.1531	-2.70011	0.00693156	0.246563
KEAP1	Endometrial Cancer	factor(sample_subtypes)Uterine Endometrioid Carcinoma	-1.91739	0.710568	-2.69839	0.00696754	0.247484
FLT1	Ovarian Cancer	factor(aya_status)1	1.98247	0.933012	2.12481	0.0336026	0.566055
PIK3R1	Colorectal Cancer	factor(sample_subtypes)Rectal Adenocarcinoma	-0.594303	0.220495	-2.69531	0.0070323	0.249063
ETV1	Colorectal Cancer	factor(sample_status)1	-0.837344	0.310666	-2.69532	0.0070322	0.249063
FAT1	Melanoma	factor(sample_subtypes)Cutaneous Melanoma	2.73167	1.01406	2.69379	0.00706447	0.249842
RUNX1	Non-Small Cell Lung Cancer	factor(sample_all$sex)Male	0.795332	0.295384	2.69253	0.00709112	0.250424
ERBB4	Bladder Cancer	factor(sample_all$sex)Male	1.62318	0.603077	2.6915	0.00711318	0.250842
DNMT1	Non-Small Cell Lung Cancer	factor(sample_subtypes)Lung Squamous Cell Carcinoma	-1.67346	0.62226	-2.68933	0.00715964	0.252118
ABL1	Bladder Cancer	factor(aya_status)1	1.64752	0.77596	2.1232	0.033737	0.566644
SPEN	Breast Cancer	factor(sample_status)1	0.576047	0.214299	2.68806	0.00718691	0.252716
NCOR1	Ovarian Cancer	factor(sample_subtypes)High-Grade Serous Ovarian Cancer	-1.50941	0.562112	-2.68526	0.00724742	0.254479
IRF4	Breast Cancer	factor(sample_subtypes)Breast Invasive Ductal Carcinoma	-3.02666	1.12809	-2.68301	0.00729633	0.25583
PTCH1	Breast Cancer	factor(sample_all$sex)Male	2.16278	0.806285	2.6824	0.00730951	0.255927
TMPRSS2	Breast Cancer	factor(sample_all$sex)Male	2.48723	0.927409	2.68192	0.00732016	0.255935
KDR	Bladder Cancer	factor(aya_status)1	1.3607	0.640708	2.12375	0.0336915	0.566644
MYCN	Non-Small Cell Lung Cancer	factor(sample_all$sex)Male	0.821961	0.30675	2.67958	0.00737141	0.257009
MSH2	Colorectal Cancer	factor(sample_status)1	-0.68115	0.254257	-2.67898	0.00738468	0.257092
GRIN2A	Melanoma	factor(sample_subtypes)others	1.79926	0.67215	2.67688	0.00743118	0.258344
AKT1	Colorectal Cancer	factor(sample_status)1	-0.86245	0.322343	-2.67556	0.00746037	0.258992
CDKN2A	Hepatobiliary Cancer	factor(sample_subtypes)Intrahepatic Cholangiocarcinoma	-1.28018	0.479396	-2.6704	0.00757609	0.262627
CBL	Breast Cancer	factor(sample_all$sex)Male	2.19095	0.820598	2.66994	0.00758648	0.262627
DAXX	Colorectal Cancer	factor(sample_status)1	-1.03519	0.387957	-2.6683	0.00762363	0.263542
REL	Colorectal Cancer	factor(aya_status)1	0.858568	0.40582	2.11564	0.0343757	0.569916
RFWD2	Non-Small Cell Lung Cancer	factor(sample_all$sex)Male	0.606386	0.2273	2.66777	0.00763555	0.263582
PIK3CG	Non-Small Cell Lung Cancer	factor(sample_subtypes)Lung Squamous Cell Carcinoma	-0.932103	0.349457	-2.66729	0.00764651	0.26359
SUZ12	Colorectal Cancer	factor(sample_status)1	-1.42071	0.533062	-2.66518	0.00769463	0.264506
ZFHX3	Non-Small Cell Lung Cancer	factor(sample_subtypes)Lung Adenocarcinoma	-0.966587	0.362631	-2.66549	0.00768771	0.264506
PIK3C2G	Melanoma	factor(sample_subtypes)Melanoma of Unknown Primary	2.75225	1.03312	2.66401	0.00772144	0.265056
NBN	Non-Small Cell Lung Cancer	factor(sample_subtypes)Lung Squamous Cell Carcinoma	-2.06537	0.775513	-2.66324	0.00773933	0.265299
EPHA7	Melanoma	factor(sample_subtypes)Cutaneous Melanoma	2.70191	1.01474	2.66265	0.00775291	0.265394
RBM10	Colorectal Cancer	factor(sample_status)1	-0.649696	0.244393	-2.6584	0.00785118	0.26801
TBX3	Breast Cancer	factor(aya_status)1	-0.895635	0.423177	-2.11645	0.0343063	0.569916
JAK1	Thyroid Cancer	factor(sample_subtypes)Poorly Differentiated Thyroid Cancer	-3.55957	1.3395	-2.65739	0.0078748	0.268187
RECQL4	Colorectal Cancer	factor(sample_status)1	-0.648176	0.243928	-2.65725	0.0078782	0.268187
PMS1	Breast Cancer	factor(sample_status)1	1.38694	0.522184	2.65603	0.00790659	0.26878
B2M	Colorectal Cancer	factor(sample_subtypes)Rectal Adenocarcinoma	-0.622661	0.23468	-2.65324	0.00797232	0.27064
PTPRS	Bladder Cancer	factor(sample_subtypes)Upper Tract Urothelial Carcinoma	0.814554	0.307273	2.65091	0.00802748	0.271974
TP53	Melanoma	factor(sample_subtypes)Uveal Melanoma	-2.81339	1.0616	-2.65014	0.00804581	0.272006
PLK2	Colorectal Cancer	factor(sample_status)1	-0.854136	0.3226	-2.64766	0.00810505	0.273632
MSH6	Colorectal Cancer	factor(aya_status)1	0.492848	0.233177	2.11362	0.0345479	0.570734
RECQL	Colorectal Cancer	factor(sample_subtypes)Rectal Adenocarcinoma	-1.59428	0.602267	-2.64713	0.00811773	0.273684
PHOX2B	Non-Small Cell Lung Cancer	factor(sample_status)1	-1.28833	0.486971	-2.6456	0.0081546	0.27455
BRCA1	Pancreatic Cancer	factor(sample_status)1	1.52088	0.575055	2.64476	0.00817485	0.274854
ERBB2	Hepatobiliary Cancer	factor(sample_subtypes)Intrahepatic Cholangiocarcinoma	-1.46901	0.556022	-2.64199	0.00824193	0.275134
TP53	Non-Small Cell Lung Cancer	factor(sample_subtypes)Lung Neuroendocrine Tumor	-1.24192	0.469893	-2.64299	0.00821785	0.275134
DDR2	Endometrial Cancer	factor(sample_subtypes)Uterine Serous Carcinoma/Uterine Papillary Serous Carcinoma	-3.89908	1.47601	-2.64164	0.0082506	0.275134
CIC	Ovarian Cancer	factor(aya_status)1	2.02143	0.956885	2.11251	0.0346425	0.571031
NOTCH2	Melanoma	factor(sample_all$sex)Male	0.768211	0.291061	2.63935	0.00830648	0.275134
CDKN1A	Bladder Cancer	factor(sample_status)1	-0.604019	0.228657	-2.64159	0.00825175	0.275134
PIK3CD	Non-Small Cell Lung Cancer	factor(sample_subtypes)Lung Squamous Cell Carcinoma	-1.90114	0.720233	-2.63962	0.00830001	0.275134
DCUN1D1	Bladder Cancer	factor(sample_status)1	2.89498	1.09809	2.63638	0.00837957	0.277181
EP300	Hepatobiliary Cancer	factor(aya_status)1	1.61434	0.765618	2.10855	0.0349838	0.571987
MSH3	Non-Small Cell Lung Cancer	factor(sample_subtypes)Lung Adenocarcinoma	-1.64731	0.625102	-2.63527	0.00840695	0.277712
TSHR	Melanoma	factor(sample_all$sex)Male	0.842177	0.319826	2.63323	0.00845762	0.278262
CDC73	Endometrial Cancer	factor(sample_subtypes)Uterine Serous Carcinoma/Uterine Papillary Serous Carcinoma	-3.90319	1.48425	-2.62973	0.00854521	0.280768
RB1	Endometrial Cancer	factor(sample_status)1	-0.897836	0.341531	-2.62885	0.00856733	0.281052
MAX	Non-Small Cell Lung Cancer	factor(sample_subtypes)Lung Squamous Cell Carcinoma	-3.05418	1.16196	-2.62848	0.00857675	0.281052
NOTCH4	Melanoma	factor(sample_subtypes)Melanoma of Unknown Primary	2.72702	1.03852	2.62588	0.0086424	0.282449
ROS1	Colorectal Cancer	factor(sample_subtypes)Colorectal Adenocarcinoma	-0.975857	0.371867	-2.62421	0.008685	0.283464
DNMT3A	Breast Cancer	factor(aya_status)1	0.797924	0.379194	2.10426	0.0353553	0.573603
TP53	Esophagogastric Cancer	factor(sample_all$sex)Male	0.437771	0.16687	2.62342	0.00870511	0.283743
ATRX	Endometrial Cancer	factor(sample_status)1	-0.844418	0.322011	-2.62232	0.00873326	0.284283
KMT2D	Endometrial Cancer	factor(sample_subtypes)Uterine Carcinosarcoma/Uterine Malignant Mixed Mullerian Tumor	-1.99584	0.761452	-2.6211	0.00876473	0.284682
NF2	Non-Small Cell Lung Cancer	factor(sample_all$sex)Male	0.724456	0.276432	2.62074	0.00877389	0.284682
ARID1B	Colorectal Cancer	factor(aya_status)1	-0.6656	0.316983	-2.0998	0.0357463	0.57546
STAT5B	Colorectal Cancer	factor(sample_subtypes)Rectal Adenocarcinoma	-1.06467	0.406286	-2.62049	0.00878033	0.284682
ATR	Endometrial Cancer	factor(sample_subtypes)Uterine Carcinosarcoma/Uterine Malignant Mixed Mullerian Tumor	-2.44775	0.934421	-2.61953	0.00880501	0.285106
FBXW7	Non-Small Cell Lung Cancer	factor(sample_subtypes)Lung Adenocarcinoma	-1.25459	0.479206	-2.61807	0.00884284	0.285954
APC	Endometrial Cancer	factor(sample_subtypes)Uterine Carcinosarcoma/Uterine Malignant Mixed Mullerian Tumor	-2.44237	0.933848	-2.61538	0.00891291	0.286333
SMARCA4	Melanoma	factor(aya_status)1	-1.51312	0.72469	-2.08796	0.0368015	0.58072
DNMT3A	Hepatobiliary Cancer	factor(sample_subtypes)Intrahepatic Cholangiocarcinoma	-1.96963	0.753064	-2.61549	0.00890998	0.286333
AKT3	Colorectal Cancer	factor(sample_status)1	-1.15983	0.443389	-2.61584	0.00890084	0.286333
NBN	Breast Cancer	factor(sample_subtypes)Breast Invasive Ductal Carcinoma	-2.88933	1.10468	-2.61553	0.00890887	0.286333
CDC73	Colorectal Cancer	factor(aya_status)1	0.681215	0.327227	2.08178	0.0373625	0.585584
GATA1	Endometrial Cancer	factor(sample_subtypes)Uterine Serous Carcinoma/Uterine Papillary Serous Carcinoma	-3.91115	1.4951	-2.61598	0.00889706	0.286333
WT1	Colorectal Cancer	factor(sample_subtypes)Rectal Adenocarcinoma	-1.23789	0.473713	-2.61316	0.00897081	0.287811
NSD1	Breast Cancer	factor(sample_status)1	0.769954	0.294694	2.61272	0.00898236	0.287811
GNAS	Colorectal Cancer	factor(sample_subtypes)others	2.11395	0.809696	2.61079	0.00903325	0.289064
VHL	Colorectal Cancer	factor(aya_status)1	1.48576	0.71459	2.07918	0.0376006	0.587441
TCF3	Breast Cancer	factor(sample_subtypes)Breast Invasive Ductal Carcinoma	-2.40911	0.923185	-2.60956	0.00906586	0.28973
SMAD4	Non-Small Cell Lung Cancer	factor(sample_all$sex)Male	-0.413191	0.158447	-2.60775	0.00911406	0.289761
MYC	Colorectal Cancer	factor(sample_subtypes)others	2.86805	1.09956	2.60835	0.009098	0.289761
JAK1	Non-Small Cell Lung Cancer	factor(sample_all$sex)Male	0.71198	0.273022	2.60778	0.00911321	0.289761
PIK3C2G	Non-Small Cell Lung Cancer	factor(sample_all$sex)Male	0.40355	0.154744	2.60786	0.00911105	0.289761
PBRM1	Hepatobiliary Cancer	factor(aya_status)1	1.01522	0.489303	2.07482	0.0380034	0.589313
ASXL1	Colorectal Cancer	factor(sample_status)1	-0.492242	0.18884	-2.60667	0.00914283	0.2903
KDM6A	Colorectal Cancer	factor(sample_subtypes)Rectal Adenocarcinoma	-0.854179	0.327772	-2.60602	0.00916021	0.290476
GLI1	Melanoma	factor(sample_status)1	1.15593	0.443705	2.60518	0.00918268	0.290813
CSF3R	Breast Cancer	factor(sample_status)1	2.74193	1.05354	2.60259	0.00925226	0.292638
XPO1	Endometrial Cancer	factor(sample_subtypes)Uterine Serous Carcinoma/Uterine Papillary Serous Carcinoma	-3.84183	1.47681	-2.60144	0.00928334	0.293243
ERCC2	Bladder Cancer	factor(sample_all$sex)Male	0.645695	0.248315	2.60031	0.00931401	0.293834
TP53	Colorectal Cancer	factor(sample_subtypes)others	-1.80614	0.695017	-2.5987	0.00935777	0.294081
PTEN	Non-Small Cell Lung Cancer	factor(aya_status)1	0.905975	0.437166	2.07238	0.0382301	0.590635
RB1	Non-Small Cell Lung Cancer	factor(sample_status)1	0.321413	0.123664	2.59907	0.00934759	0.294081
TP53	Melanoma	factor(sample_subtypes)Mucosal Melanoma of the Vulva/Vagina	1.22448	0.471689	2.59594	0.00943329	0.294568
MTOR	Melanoma	factor(sample_all$sex)Male	0.72154	0.277815	2.5972	0.00939875	0.294568
IKZF1	Colorectal Cancer	factor(sample_subtypes)Rectal Adenocarcinoma	-0.677301	0.260847	-2.59654	0.0094167	0.294568
ARID2	Hepatobiliary Cancer	factor(sample_subtypes)others	2.61005	1.00505	2.59694	0.00940573	0.294568
SHQ1	Colorectal Cancer	factor(sample_status)1	-1.38302	0.532758	-2.59596	0.00943264	0.294568
TSC2	Pancreatic Cancer	factor(sample_status)1	0.866004	0.334006	2.59278	0.00952034	0.296909
DNMT3B	Non-Small Cell Lung Cancer	factor(sample_subtypes)Lung Adenocarcinoma	-1.38526	0.534376	-2.5923	0.00953357	0.296944
ATM	Renal Cell Carcinoma	factor(aya_status)1	1.4117	0.681315	2.07202	0.0382634	0.590635
PRDM14	Colorectal Cancer	factor(sample_subtypes)Rectal Adenocarcinoma	-1.89153	0.730151	-2.5906	0.00958092	0.298041
PTPRD	Esophagogastric Cancer	factor(sample_subtypes)Stomach Adenocarcinoma	-1.23955	0.478958	-2.58802	0.00965294	0.29954
ASXL2	Melanoma	factor(sample_all$sex)Male	0.795796	0.307495	2.588	0.00965354	0.29954
RNF43	Colorectal Cancer	factor(sample_all$sex)Male	-0.31391	0.121388	-2.58601	0.00970933	0.300891
ERCC2	Colorectal Cancer	factor(sample_subtypes)Rectal Adenocarcinoma	-1.2225	0.474206	-2.578	0.00993747	0.307185
FGFR1	Breast Cancer	factor(sample_status)1	1.24802	0.484763	2.57448	0.0100389	0.309932
RHEB	Non-Small Cell Lung Cancer	factor(sample_status)1	1.54334	0.599832	2.57296	0.0100832	0.310908
CREBBP	Colorectal Cancer	factor(aya_status)1	0.410995	0.198771	2.06768	0.03867	0.591718
TSC2	Colorectal Cancer	factor(sample_subtypes)Rectal Adenocarcinoma	-0.64146	0.249375	-2.57227	0.0101034	0.311138
BRCA2	Endometrial Cancer	factor(sample_subtypes)Uterine Serous Carcinoma/Uterine Papillary Serous Carcinoma	-2.22869	0.866928	-2.57079	0.0101467	0.311689
XPO1	Non-Small Cell Lung Cancer	factor(sample_all$sex)Male	0.71269	0.277207	2.57096	0.0101416	0.311689
KMT2C	Breast Cancer	factor(sample_status)1	0.351608	0.136795	2.57033	0.0101602	0.311715
FGFR4	Endometrial Cancer	factor(sample_subtypes)Uterine Endometrioid Carcinoma	-2.19009	0.852259	-2.56975	0.0101772	0.311848
EPHA7	Melanoma	factor(sample_subtypes)Melanoma of Unknown Primary	2.65564	1.03389	2.5686	0.010211	0.312492
EGFR	Melanoma	factor(aya_status)1	-2.09194	1.013	-2.06509	0.0389148	0.593614
TMPRSS2	Breast Cancer	factor(sample_subtypes)Breast Invasive Ductal Carcinoma	-2.42618	0.945702	-2.56548	0.0103034	0.314927
NOTCH4	Non-Small Cell Lung Cancer	factor(sample_subtypes)Lung Adenocarcinoma	-0.976104	0.380786	-2.56339	0.0103655	0.31643
NEGR1	Non-Small Cell Lung Cancer	factor(sample_subtypes)Lung Adenocarcinoma	-1.37285	0.535674	-2.56285	0.0103817	0.316532
INHBA	Melanoma	factor(sample_all$sex)Male	0.793508	0.310021	2.55953	0.0104813	0.318778
AURKB	Colorectal Cancer	factor(aya_status)1	0.980443	0.476165	2.05904	0.0394905	0.598306
PAK1	Colorectal Cancer	factor(sample_status)1	-1.36765	0.534258	-2.55991	0.01047	0.318778
MAX	Colorectal Cancer	factor(sample_all$sex)Male	-1.45863	0.57024	-2.55793	0.0105297	0.319457
CENPA	Non-Small Cell Lung Cancer	factor(sample_subtypes)Lung Adenocarcinoma	-1.97312	0.77136	-2.55798	0.0105284	0.319457
BRIP1	Breast Cancer	factor(sample_status)1	1.00491	0.393262	2.55532	0.0106089	0.320672
EIF1AX	Melanoma	factor(sample_all$sex)Male	1.08132	0.42312	2.55559	0.0106009	0.320672
RPS6KB2	Breast Cancer	factor(sample_subtypes)Breast Invasive Ductal Carcinoma	-2.87612	1.12553	-2.55534	0.0106085	0.320672
CDKN1A	Breast Cancer	factor(sample_all$sex)Male	2.91211	1.14035	2.55371	0.0106582	0.321766
MAP2K2	Bladder Cancer	factor(aya_status)1	2.2729	1.1059	2.05525	0.0398549	0.600491
PBRM1	Endometrial Cancer	factor(sample_status)1	-1.17318	0.459939	-2.55074	0.0107496	0.323728
ERCC4	Colorectal Cancer	factor(sample_subtypes)Rectal Adenocarcinoma	-1.3476	0.528304	-2.55081	0.0107473	0.323728
SPEN	Non-Small Cell Lung Cancer	factor(sample_status)1	0.455417	0.178646	2.54926	0.0107951	0.324698
FLT1	Esophagogastric Cancer	factor(sample_subtypes)Esophagogastric Adenocarcinoma	1.92193	0.754532	2.54719	0.0108596	0.324761
MAP3K1	Hepatobiliary Cancer	factor(sample_subtypes)others	2.85244	1.11988	2.54709	0.0108627	0.324761
CALR	Colorectal Cancer	factor(sample_subtypes)others	2.99961	1.17767	2.54707	0.0108633	0.324761
PLCG2	Endometrial Cancer	factor(sample_subtypes)Uterine Serous Carcinoma/Uterine Papillary Serous Carcinoma	-3.75035	1.47211	-2.5476	0.0108466	0.324761
APC	Melanoma	factor(aya_status)1	-1.07308	0.52252	-2.05367	0.0400078	0.601523
ELF3	Breast Cancer	factor(sample_subtypes)Breast Invasive Ductal Carcinoma	-3.25442	1.27712	-2.54824	0.0108267	0.324761
TP53	Ovarian Cancer	factor(sample_subtypes)Low-Grade Serous Ovarian Cancer	-2.66715	1.04802	-2.54493	0.0109298	0.325576
ATRX	Head and Neck Cancer	factor(sample_all$sex)Male	-1.32132	0.519347	-2.5442	0.0109528	0.325576
CDKN2C	Non-Small Cell Lung Cancer	factor(sample_subtypes)Lung Squamous Cell Carcinoma	-2.36026	0.927751	-2.54407	0.0109569	0.325576
MAP3K13	Bladder Cancer	factor(aya_status)1	1.57904	0.77071	2.04881	0.0404808	0.604868
DOT1L	Colorectal Cancer	factor(sample_status)1	-0.541023	0.212599	-2.5448	0.0109341	0.325576
INHBA	Esophagogastric Cancer	factor(sample_status)1	1.2943	0.50859	2.54489	0.0109314	0.325576
POLE	Pancreatic Cancer	factor(sample_status)1	1.23872	0.487037	2.54337	0.0109788	0.325832
ATRX	Colorectal Cancer	factor(sample_subtypes)Rectal Adenocarcinoma	-0.603847	0.237492	-2.5426	0.0110032	0.326162
BCL2L11	Bladder Cancer	factor(aya_status)1	2.27008	1.10947	2.04609	0.0407472	0.605115
ALK	Colorectal Cancer	factor(sample_subtypes)Colorectal Adenocarcinoma	-0.812013	0.319662	-2.54023	0.0110781	0.327591
RASA1	Breast Cancer	factor(sample_status)1	1.65422	0.651195	2.54028	0.0110763	0.327591
PIK3C2G	Endometrial Cancer	factor(sample_subtypes)Uterine Serous Carcinoma/Uterine Papillary Serous Carcinoma	-3.72659	1.46733	-2.53971	0.0110945	0.327682
TCF7L2	Colorectal Cancer	factor(aya_status)1	0.315478	0.155063	2.03451	0.0419005	0.610343
CIC	Hepatobiliary Cancer	factor(sample_status)1	1.30853	0.515498	2.53838	0.0111365	0.328235
MDM4	Breast Cancer	factor(sample_all$sex)Male	2.85379	1.12456	2.53768	0.0111589	0.328399
DNMT3A	Bladder Cancer	factor(sample_subtypes)Upper Tract Urothelial Carcinoma	0.910939	0.359032	2.53721	0.0111741	0.328452
MAP3K13	Colorectal Cancer	factor(sample_subtypes)Rectal Adenocarcinoma	-0.968383	0.382174	-2.53388	0.0112806	0.331187
KMT2A	Melanoma	factor(aya_status)1	-0.883393	0.434514	-2.03306	0.0420463	0.610641
CXCR4	Non-Small Cell Lung Cancer	factor(sample_all$sex)Male	-1.30674	0.515901	-2.53293	0.0113112	0.331688
PIK3CD	Esophagogastric Cancer	factor(sample_all$sex)Male	-1.5808	0.624307	-2.53208	0.0113389	0.332101
PTPRS	Non-Small Cell Lung Cancer	factor(sample_subtypes)Lung Adenocarcinoma	-1.20498	0.476582	-2.52837	0.0114593	0.335229
FLT3	Colorectal Cancer	factor(sample_status)1	-0.817038	0.323522	-2.52545	0.011555	0.335889
PDGFRA	Endometrial Cancer	factor(sample_status)1	-1.22826	0.486318	-2.52562	0.0115493	0.335889
KDM6A	Bladder Cancer	factor(sample_subtypes)Upper Tract Urothelial Carcinoma	-0.424388	0.168063	-2.52518	0.011564	0.335889
POLE	Colorectal Cancer	factor(aya_status)1	0.420523	0.208053	2.02123	0.0432561	0.616941
RAD51D	Endometrial Cancer	factor(sample_subtypes)Uterine Endometrioid Carcinoma	-3.24888	1.28631	-2.52574	0.0115457	0.335889
EPHB1	Colorectal Cancer	factor(sample_status)1	-0.526503	0.208435	-2.52598	0.0115376	0.335889
FGFR3	Bladder Cancer	factor(sample_subtypes)Upper Tract Urothelial Carcinoma	0.399968	0.158606	2.52177	0.0116765	0.337412
EP300	Breast Cancer	factor(sample_status)1	0.794715	0.315225	2.5211	0.0116989	0.337412
IRS2	Colorectal Cancer	factor(sample_subtypes)Rectal Adenocarcinoma	-0.664938	0.263716	-2.52142	0.0116883	0.337412
NF1	Breast Cancer	factor(aya_status)1	-0.856155	0.424135	-2.01859	0.0435297	0.61754
RHOA	Esophagogastric Cancer	factor(sample_subtypes)Stomach Adenocarcinoma	2.60462	1.03253	2.52256	0.0116505	0.337412
YES1	Breast Cancer	factor(sample_subtypes)Breast Invasive Ductal Carcinoma	-2.85315	1.13124	-2.52216	0.0116638	0.337412
ROS1	Endometrial Cancer	factor(sample_status)1	-0.883926	0.350744	-2.52015	0.0117305	0.337927
FLT1	Endometrial Cancer	factor(sample_subtypes)Uterine Serous Carcinoma/Uterine Papillary Serous Carcinoma	-3.68335	1.46302	-2.51763	0.0118148	0.339956
PAK1	Bladder Cancer	factor(sample_subtypes)Upper Tract Urothelial Carcinoma	1.61915	0.643442	2.51639	0.0118565	0.340755
ARID1A	Head and Neck Cancer	factor(sample_subtypes)Oral Cavity Squamous Cell Carcinoma	-1.73726	0.690556	-2.51574	0.0118783	0.340983
CDC73	Colorectal Cancer	factor(sample_status)1	-0.844515	0.335945	-2.51385	0.0119421	0.342413
BRCA2	Melanoma	factor(aya_status)1	-1.20813	0.598511	-2.01857	0.0435324	0.61754
RAD21	Colorectal Cancer	factor(sample_status)1	-1.11615	0.444197	-2.51273	0.01198	0.3431
RAD21	Non-Small Cell Lung Cancer	factor(sample_subtypes)Lung Adenocarcinoma	-1.5581	0.620641	-2.51048	0.0120568	0.344898
HLA-A	Non-Small Cell Lung Cancer	factor(sample_all$sex)Male	0.862401	0.343605	2.50986	0.0120778	0.345097
MTOR	Colorectal Cancer	factor(sample_subtypes)Colorectal Adenocarcinoma	-0.717292	0.285944	-2.5085	0.0121243	0.34522
PARK2	Colorectal Cancer	factor(sample_all$sex)Male	0.68147	0.271582	2.50926	0.0120984	0.34522
GLI1	Non-Small Cell Lung Cancer	factor(sample_subtypes)Lung Squamous Cell Carcinoma	-1.3134	0.523579	-2.50851	0.0121242	0.34522
NOTCH1	Colorectal Cancer	factor(sample_subtypes)Rectal Adenocarcinoma	-0.511012	0.203956	-2.5055	0.0122278	0.347361
EIF1AX	Melanoma	factor(sample_subtypes)Uveal Melanoma	1.66588	0.664815	2.50578	0.0122181	0.347361
PAK7	Melanoma	factor(aya_status)1	-0.654527	0.324285	-2.01837	0.0435529	0.61754
ROS1	Melanoma	factor(sample_subtypes)Head and Neck Mucosal Melanoma	2.699	1.07791	2.50392	0.0122824	0.347586
AXL	Colorectal Cancer	factor(sample_subtypes)Rectal Adenocarcinoma	-0.657822	0.262747	-2.50364	0.0122924	0.347586
MSH2	Endometrial Cancer	factor(sample_subtypes)Uterine Serous Carcinoma/Uterine Papillary Serous Carcinoma	-3.66275	1.46248	-2.50448	0.0122633	0.347586
GRIN2A	Ovarian Cancer	factor(sample_subtypes)High-Grade Serous Ovarian Cancer	-1.69238	0.675901	-2.50389	0.0122837	0.347586
PTPN11	Colorectal Cancer	factor(sample_all$sex)Male	0.854013	0.341205	2.50293	0.0123169	0.347878
APC	Melanoma	factor(sample_all$sex)Male	0.536987	0.21471	2.50098	0.0123849	0.348594
SMARCB1	Colorectal Cancer	factor(sample_subtypes)Rectal Adenocarcinoma	-1.18868	0.475237	-2.50124	0.0123761	0.348594
PPP4R2	Colorectal Cancer	factor(aya_status)1	1.22637	0.607562	2.01852	0.0435375	0.61754
MDM2	Non-Small Cell Lung Cancer	factor(sample_all$sex)Male	0.813251	0.325171	2.501	0.0123844	0.348594
ERCC2	Colorectal Cancer	factor(sample_status)1	-0.883174	0.353298	-2.4998	0.0124263	0.34936
ROS1	Breast Cancer	factor(sample_subtypes)Breast Invasive Lobular Carcinoma	-2.67855	1.07233	-2.49788	0.0124938	0.349659
SDHA	Melanoma	factor(sample_all$sex)Male	2.57199	1.0296	2.49804	0.0124882	0.349659
HIST1H3B	Breast Cancer	factor(sample_status)1	1.14329	0.457567	2.49862	0.0124678	0.349659
IRS1	Colorectal Cancer	factor(sample_subtypes)Rectal Adenocarcinoma	-0.623373	0.249561	-2.49788	0.0124939	0.349659
ARID1B	Hepatobiliary Cancer	factor(aya_status)1	1.41347	0.700746	2.0171	0.0436855	0.618349
ARID1A	Endometrial Cancer	factor(sample_subtypes)Uterine Serous Carcinoma/Uterine Papillary Serous Carcinoma	-1.78386	0.714458	-2.4968	0.0125319	0.349923
RRAS	Endometrial Cancer	factor(sample_subtypes)Uterine Endometrioid Carcinoma	-3.30207	1.32357	-2.49482	0.012602	0.35148
FGFR2	Esophagogastric Cancer	factor(sample_subtypes)others	3.19739	1.28267	2.49276	0.0126756	0.35237
RET	Colorectal Cancer	factor(sample_subtypes)Rectal Adenocarcinoma	-0.855524	0.343209	-2.49272	0.0126769	0.35237
FUBP1	Bladder Cancer	factor(aya_status)1	1.5603	0.773678	2.01674	0.0437231	0.618524
PLK2	Breast Cancer	factor(sample_subtypes)Breast Invasive Ductal Carcinoma	-2.02426	0.811873	-2.49332	0.0126556	0.35237
KDM6A	Bladder Cancer	factor(sample_status)1	-0.376982	0.151297	-2.49167	0.0127145	0.353014
SOX2	Non-Small Cell Lung Cancer	factor(sample_subtypes)Lung Adenocarcinoma	-1.54479	0.62015	-2.491	0.0127383	0.353277
CCND3	Endometrial Cancer	factor(sample_subtypes)Uterine Serous Carcinoma/Uterine Papillary Serous Carcinoma	-3.72299	1.49495	-2.49037	0.012761	0.353316
PRKCI	Colorectal Cancer	factor(sample_status)1	-1.32071	0.530541	-2.48936	0.0127974	0.353316
MAPK3	Bladder Cancer	factor(sample_subtypes)others	2.84447	1.14252	2.48966	0.0127867	0.353316
CSF3R	Colorectal Cancer	factor(sample_all$sex)Male	0.632629	0.254325	2.48748	0.0128651	0.354787
PDGFRA	Melanoma	factor(aya_status)1	-1.45372	0.725889	-2.00268	0.0452115	0.628079
TP53	Esophagogastric Cancer	factor(sample_subtypes)Stomach Adenocarcinoma	-0.510454	0.205339	-2.48591	0.0129222	0.355963
TCF3	Breast Cancer	factor(sample_all$sex)Male	2.1913	0.881874	2.48482	0.0129615	0.356473
ICOSLG	Melanoma	factor(sample_all$sex)Male	2.54031	1.0234	2.48223	0.0130563	0.358449
PTEN	Thyroid Cancer	factor(sample_subtypes)Papillary Thyroid Cancer	-3.13816	1.26451	-2.48172	0.0130749	0.35856
RXRA	Melanoma	factor(aya_status)1	1.71575	0.857984	1.99975	0.0455276	0.629486
STAT5A	Non-Small Cell Lung Cancer	factor(sample_all$sex)Male	1.08938	0.439052	2.48121	0.0130936	0.358671
KDM5C	Breast Cancer	factor(sample_status)1	0.81816	0.329817	2.48065	0.0131143	0.358839
BRCA2	Hepatobiliary Cancer	factor(sample_subtypes)Intrahepatic Cholangiocarcinoma	-1.54493	0.623575	-2.47754	0.0132292	0.360953
WHSC1	Colorectal Cancer	factor(sample_subtypes)Rectal Adenocarcinoma	-1.08447	0.437751	-2.47736	0.0132357	0.360953
SF3B1	Breast Cancer	factor(aya_status)1	-1.43646	0.72028	-1.99431	0.0461181	0.634661
KNSTRN	Melanoma	factor(sample_all$sex)Male	0.938945	0.379111	2.4767	0.0132603	0.361223
PGR	Melanoma	factor(aya_status)1	-2.02129	1.01566	-1.99014	0.0465757	0.637109
JAK3	Colorectal Cancer	factor(sample_status)1	-0.619954	0.250474	-2.47512	0.0133192	0.362022
DNMT1	Ovarian Cancer	factor(sample_status)1	-1.48293	0.599069	-2.47539	0.0133092	0.362022
YAP1	Colorectal Cancer	factor(sample_status)1	-1.51192	0.611078	-2.47419	0.0133538	0.362562
PIK3R3	Colorectal Cancer	factor(sample_status)1	-1.82477	0.738223	-2.47184	0.013442	0.364552
TAP2	Colorectal Cancer	factor(aya_status)1	0.7202	0.363029	1.98386	0.0472713	0.641527
PDGFRB	Endometrial Cancer	factor(sample_subtypes)Uterine Serous Carcinoma/Uterine Papillary Serous Carcinoma	-3.6382	1.47222	-2.47123	0.0134649	0.364772
KMT2C	Colorectal Cancer	factor(sample_subtypes)Rectal Adenocarcinoma	-0.436009	0.176466	-2.47078	0.0134817	0.364824
KDM5C	Non-Small Cell Lung Cancer	factor(sample_subtypes)Lung Squamous Cell Carcinoma	-1.4789	0.598689	-2.47022	0.0135028	0.364992
FANCA	Pancreatic Cancer	factor(sample_status)1	1.30679	0.529468	2.46813	0.0135822	0.365529
CTCF	Non-Small Cell Lung Cancer	factor(sample_status)1	0.67409	0.273042	2.46882	0.0135561	0.365529
FOXA1	Bladder Cancer	factor(sample_status)1	-1.29466	0.524537	-2.4682	0.0135796	0.365529
SMARCA4	Non-Small Cell Lung Cancer	factor(aya_status)1	-1.99251	1.00544	-1.98174	0.0475083	0.643304
KDM5C	Colorectal Cancer	factor(sample_subtypes)Rectal Adenocarcinoma	-0.812393	0.329438	-2.46599	0.0136634	0.365532
RAD54L	Colorectal Cancer	factor(sample_status)1	-0.909291	0.368765	-2.46578	0.0136717	0.365532
PLCG2	Endometrial Cancer	factor(sample_status)1	-1.19882	0.48611	-2.46615	0.0136572	0.365532
ZFHX3	Endometrial Cancer	factor(sample_subtypes)Uterine Carcinosarcoma/Uterine Malignant Mixed Mullerian Tumor	-2.29128	0.928598	-2.46746	0.0136075	0.365532
ELF3	Hepatobiliary Cancer	factor(sample_subtypes)Hepatocellular Carcinoma	-2.68876	1.08977	-2.46728	0.0136143	0.365532
KIT	Melanoma	factor(aya_status)1	-2.01443	1.01686	-1.98103	0.0475882	0.643529
HOXB13	Non-Small Cell Lung Cancer	factor(sample_subtypes)Lung Adenocarcinoma	-1.52987	0.62076	-2.46451	0.0137202	0.36643
NF1	Hepatobiliary Cancer	factor(sample_subtypes)Intrahepatic Cholangiocarcinoma	-1.2072	0.490134	-2.463	0.0137781	0.367576
FH	Endometrial Cancer	factor(sample_subtypes)Uterine Serous Carcinoma/Uterine Papillary Serous Carcinoma	-3.6226	1.47208	-2.46087	0.0138599	0.368778
NF1	Endometrial Cancer	factor(sample_subtypes)Uterine Endometrioid Carcinoma	-1.58446	0.644087	-2.46001	0.0138932	0.369043
AGO2	Colorectal Cancer	factor(sample_subtypes)Rectal Adenocarcinoma	-1.00325	0.408263	-2.45737	0.0139957	0.371363
CTNNB1	Endometrial Cancer	factor(sample_subtypes)Uterine Carcinosarcoma/Uterine Malignant Mixed Mullerian Tumor	-2.39699	0.975792	-2.45646	0.0140315	0.371911
TP53	Soft Tissue Sarcoma	factor(sample_subtypes)others	1.87349	0.763754	2.45301	0.0141668	0.374283
POLE	Esophagogastric Cancer	factor(aya_status)1	1.36886	0.693045	1.97514	0.0482518	0.644758
SMO	Colorectal Cancer	factor(sample_status)1	-0.603197	0.245896	-2.45306	0.0141647	0.374283
AURKA	Breast Cancer	factor(sample_status)1	1.92082	0.782938	2.45334	0.0141535	0.374283
RAD50	Colorectal Cancer	factor(sample_status)1	-0.662035	0.26993	-2.45261	0.0141822	0.374289
PALB2	Breast Cancer	factor(sample_all$sex)Male	1.96813	0.802663	2.452	0.0142064	0.374525
ARAF	Bladder Cancer	factor(sample_subtypes)Upper Tract Urothelial Carcinoma	1.39401	0.568632	2.45151	0.0142259	0.374636
FANCA	Endometrial Cancer	factor(sample_subtypes)Uterine Serous Carcinoma/Uterine Papillary Serous Carcinoma	-3.58014	1.46224	-2.44839	0.0143495	0.377486
CREBBP	Thyroid Cancer	factor(sample_subtypes)Papillary Thyroid Cancer	-3.44128	1.40602	-2.44753	0.0143839	0.377685
ANKRD11	Esophagogastric Cancer	factor(sample_all$sex)Male	-1.23761	0.505864	-2.44652	0.0144244	0.37824
INPP4B	Breast Cancer	factor(aya_status)1	1.38295	0.70023	1.97499	0.0482697	0.644758
BRAF	Colorectal Cancer	factor(sample_subtypes)Colorectal Adenocarcinoma	-0.428114	0.175229	-2.44318	0.0145586	0.381352
RNF43	Melanoma	factor(sample_all$sex)Male	0.968941	0.39691	2.44121	0.0146381	0.383025
SMARCA4	Bladder Cancer	factor(sample_subtypes)Upper Tract Urothelial Carcinoma	0.547744	0.224434	2.44056	0.0146647	0.383312
KDM6A	Colorectal Cancer	factor(sample_status)1	-0.628295	0.257544	-2.43956	0.0147051	0.383585
LATS1	Esophagogastric Cancer	factor(sample_status)1	2.72657	1.11766	2.43953	0.0147064	0.383585
FLT3	Breast Cancer	factor(sample_status)1	1.11743	0.458526	2.43701	0.0148094	0.383758
ARID1A	Endometrial Cancer	factor(sample_subtypes)Uterine Carcinosarcoma/Uterine Malignant Mixed Mullerian Tumor	-1.7912	0.734723	-2.43793	0.0147716	0.383758
NRAS	Melanoma	factor(aya_status)1	-0.564601	0.287293	-1.96525	0.0493856	0.652379
RARA	Colorectal Cancer	factor(sample_status)1	-0.9489	0.389387	-2.43691	0.0148134	0.383758
NCOR1	Endometrial Cancer	factor(sample_status)1	-0.900023	0.369159	-2.43804	0.0147673	0.383758
NOTCH4	Melanoma	factor(sample_all$sex)Male	0.481667	0.197673	2.43669	0.0148225	0.383758
INPPL1	Non-Small Cell Lung Cancer	factor(sample_all$sex)Male	0.600099	0.246186	2.43758	0.0147858	0.383758
AMER1	Colorectal Cancer	factor(sample_status)1	-0.34323	0.140935	-2.43539	0.0148759	0.384006
AMER1	Endometrial Cancer	factor(sample_subtypes)Uterine Serous Carcinoma/Uterine Papillary Serous Carcinoma	-3.08709	1.26746	-2.43566	0.0148649	0.384006
STK40	Non-Small Cell Lung Cancer	factor(sample_subtypes)Lung Squamous Cell Carcinoma	-2.25705	0.9268	-2.43531	0.014879	0.384006
SPOP	Non-Small Cell Lung Cancer	factor(aya_status)1	1.4553	0.74137	1.96298	0.0496482	0.653153
TNFAIP3	Colorectal Cancer	factor(sample_subtypes)Rectal Adenocarcinoma	-0.99118	0.407168	-2.43433	0.0149195	0.38421
RNF43	Non-Small Cell Lung Cancer	factor(sample_all$sex)Male	0.644147	0.264648	2.43398	0.0149339	0.38421
POLD1	Bladder Cancer	factor(sample_subtypes)Upper Tract Urothelial Carcinoma	0.915728	0.37611	2.43473	0.0149027	0.38421
BRCA2	Pancreatic Cancer	factor(sample_status)1	0.640837	0.263419	2.43276	0.0149841	0.385099
GRIN2A	Hepatobiliary Cancer	factor(aya_status)1	1.40071	0.713389	1.96346	0.0495932	0.653153
MAP2K1	Endometrial Cancer	factor(sample_subtypes)Uterine Serous Carcinoma/Uterine Papillary Serous Carcinoma	-3.5979	1.47962	-2.43164	0.0150308	0.385447
NKX2-1	Non-Small Cell Lung Cancer	factor(sample_status)1	-0.537716	0.221183	-2.43109	0.0150536	0.385447
PTPRT	Colorectal Cancer	factor(sample_status)1	-0.341728	0.140575	-2.43092	0.0150604	0.385447
ZFHX3	Non-Small Cell Lung Cancer	factor(sample_status)1	0.328044	0.1349	2.43176	0.0150258	0.385447
PTPRS	Head and Neck Cancer	factor(aya_status)1	1.72193	0.877237	1.96291	0.0496571	0.653153
ERBB4	Esophagogastric Cancer	factor(sample_all$sex)Male	0.967783	0.398462	2.4288	0.015149	0.387106
PRKCI	Endometrial Cancer	factor(sample_subtypes)Uterine Serous Carcinoma/Uterine Papillary Serous Carcinoma	-3.63458	1.49657	-2.42861	0.0151568	0.387106
FGFR3	Non-Small Cell Lung Cancer	factor(sample_all$sex)Male	-0.897775	0.369778	-2.42788	0.0151875	0.387487
ERBB2	Hepatobiliary Cancer	factor(sample_subtypes)Hepatocellular Carcinoma	-2.61755	1.07962	-2.4245	0.0153296	0.388657
SHQ1	Colorectal Cancer	factor(aya_status)1	0.793365	0.405095	1.95847	0.0501752	0.655824
TP53	Endometrial Cancer	factor(sample_subtypes)Uterine Endometrioid Carcinoma	-1.43439	0.591547	-2.4248	0.0153167	0.388657
FLT3	Melanoma	factor(sample_subtypes)Cutaneous Melanoma	2.46227	1.01572	2.42415	0.0153442	0.388657
TET1	Colorectal Cancer	factor(sample_subtypes)Rectal Adenocarcinoma	-0.620418	0.255805	-2.42535	0.0152935	0.388657
TGFBR1	Endometrial Cancer	factor(sample_subtypes)Uterine Serous Carcinoma/Uterine Papillary Serous Carcinoma	-3.55644	1.46688	-2.42449	0.0153297	0.388657
TOP1	Non-Small Cell Lung Cancer	factor(sample_subtypes)Lung Squamous Cell Carcinoma	-1.66286	0.686285	-2.42299	0.0153932	0.389496
PIK3CG	Bladder Cancer	factor(aya_status)1	1.50316	0.771664	1.94795	0.0514208	0.662436
ARID1B	Colorectal Cancer	factor(sample_subtypes)Rectal Adenocarcinoma	-0.519239	0.214402	-2.42181	0.0154436	0.390368
PMS2	Breast Cancer	factor(sample_subtypes)Breast Invasive Ductal Carcinoma	-2.65555	1.09763	-2.41935	0.0155481	0.392605
SH2B3	Bladder Cancer	factor(sample_subtypes)others	2.72618	1.12743	2.41804	0.0156042	0.393617
CTNNB1	Breast Cancer	factor(sample_subtypes)Breast Invasive Ductal Carcinoma	-2.68352	1.11117	-2.41505	0.015733	0.396265
CHEK2	Colorectal Cancer	factor(sample_status)1	-0.942919	0.390466	-2.41486	0.0157414	0.396265
EPHA5	Non-Small Cell Lung Cancer	factor(sample_subtypes)Lung Squamous Cell Carcinoma	-0.834916	0.34591	-2.41368	0.0157921	0.396727
PGR	Hepatobiliary Cancer	factor(sample_status)1	1.5231	0.630989	2.41382	0.0157861	0.396727
EPHA3	Melanoma	factor(aya_status)1	-1.02061	0.524816	-1.94471	0.0518103	0.663766
TP53BP1	Breast Cancer	factor(sample_all$sex)Male	2.01466	0.834843	2.41322	0.0158124	0.396829
NOTCH4	Head and Neck Cancer	factor(sample_subtypes)others	1.80976	0.750133	2.41258	0.01584	0.397116
PBRM1	Colorectal Cancer	factor(sample_subtypes)Rectal Adenocarcinoma	-0.61918	0.256874	-2.41045	0.0159331	0.398782
DOT1L	Melanoma	factor(sample_all$sex)Male	0.745666	0.309413	2.40994	0.0159552	0.398782
FAT1	Thyroid Cancer	factor(sample_subtypes)Papillary Thyroid Cancer	-3.37234	1.39925	-2.41011	0.0159477	0.398782
BRAF	Non-Small Cell Lung Cancer	factor(sample_subtypes)Lung Squamous Cell Carcinoma	-1.14008	0.47333	-2.40864	0.016012	0.399388
ERF	Non-Small Cell Lung Cancer	factor(sample_subtypes)Lung Adenocarcinoma	-1.8434	0.765541	-2.40796	0.0160418	0.399725
HIST1H3J	Colorectal Cancer	factor(sample_all$sex)Male	-1.3687	0.568834	-2.40615	0.0161217	0.400902
MDC1	Melanoma	factor(aya_status)1	-1.16185	0.599207	-1.93897	0.0525046	0.666669
ERG	Melanoma	factor(sample_all$sex)Male	0.745118	0.310072	2.40305	0.016259	0.403499
MAP3K13	Colorectal Cancer	factor(sample_status)1	-0.705072	0.293394	-2.40316	0.016254	0.403499
SF3B1	Esophagogastric Cancer	factor(sample_all$sex)Male	-1.33467	0.555941	-2.40074	0.0163621	0.40373
KMT2D	Esophagogastric Cancer	factor(sample_subtypes)Esophagogastric Adenocarcinoma	1.35978	0.566687	2.39953	0.0164163	0.40373
ERCC4	Colorectal Cancer	factor(sample_all$sex)Male	0.769055	0.320432	2.40006	0.0163925	0.40373
NOTCH4	Non-Small Cell Lung Cancer	factor(sample_subtypes)Lung Squamous Cell Carcinoma	-1.07081	0.446239	-2.39963	0.0164117	0.40373
EIF1AX	Colorectal Cancer	factor(sample_all$sex)Male	-1.85167	0.771056	-2.40147	0.0163294	0.40373
NOTCH2	Breast Cancer	factor(aya_status)1	0.693082	0.358034	1.9358	0.0528927	0.667969
PDCD1	Endometrial Cancer	factor(sample_subtypes)Uterine Serous Carcinoma/Uterine Papillary Serous Carcinoma	-3.52258	1.46654	-2.40196	0.0163074	0.40373
DNMT1	Colorectal Cancer	factor(sample_subtypes)Rectal Adenocarcinoma	-0.64645	0.26921	-2.40128	0.0163377	0.40373
LATS1	Melanoma	factor(sample_all$sex)Male	1.17956	0.491096	2.40189	0.0163106	0.40373
NF1	Non-Small Cell Lung Cancer	factor(sample_subtypes)Lung Adenocarcinoma	-0.733631	0.305955	-2.39784	0.016492	0.405184
ERBB2	Esophagogastric Cancer	factor(sample_subtypes)Esophageal Adenocarcinoma	-1.33734	0.557826	-2.39741	0.0165114	0.405256
DNMT3A	Ovarian Cancer	factor(sample_subtypes)High-Grade Serous Ovarian Cancer	-1.48762	0.620731	-2.39656	0.01655	0.405393
FGFR2	Esophagogastric Cancer	factor(aya_status)1	1.33107	0.688667	1.93282	0.0532584	0.669858
LMO1	Melanoma	factor(sample_status)1	-1.98658	0.828914	-2.3966	0.0165478	0.405393
TP53	Thyroid Cancer	factor(sample_subtypes)Papillary Thyroid Cancer	-2.17041	0.907012	-2.39292	0.0167149	0.405786
STK11	Non-Small Cell Lung Cancer	factor(sample_subtypes)others	-1.8362	0.766553	-2.3954	0.0166023	0.405786
STK11	Hepatobiliary Cancer	factor(sample_subtypes)Hepatocellular Carcinoma	-2.58313	1.07917	-2.39361	0.0166833	0.405786
PALB2	Colorectal Cancer	factor(aya_status)1	0.583093	0.3017	1.93269	0.0532742	0.669858
MLH1	Colorectal Cancer	factor(sample_all$sex)Male	0.573195	0.239335	2.39495	0.0166225	0.405786
EPHA3	Melanoma	factor(sample_subtypes)Cutaneous Melanoma	2.43467	1.01649	2.39517	0.0166124	0.405786
BRD4	Esophagogastric Cancer	factor(sample_status)1	1.81441	0.757982	2.39374	0.0166776	0.405786
TGFBR2	Endometrial Cancer	factor(sample_subtypes)Uterine Endometrioid Carcinoma	-2.00537	0.837493	-2.39449	0.0166435	0.405786
HOXB13	Non-Small Cell Lung Cancer	factor(sample_subtypes)Lung Squamous Cell Carcinoma	-2.21208	0.924366	-2.39308	0.0167077	0.405786
MYOD1	Colorectal Cancer	factor(sample_status)1	-0.725849	0.303293	-2.39323	0.0167009	0.405786
ABL1	Non-Small Cell Lung Cancer	factor(sample_all$sex)Male	0.602785	0.252185	2.39025	0.016837	0.406741
PIK3R3	Colorectal Cancer	factor(aya_status)1	0.910043	0.470836	1.93282	0.0532579	0.669858
BRCA1	Colorectal Cancer	factor(sample_status)1	-0.575797	0.240833	-2.39086	0.0168091	0.406741
ERBB3	Hepatobiliary Cancer	factor(sample_subtypes)Intrahepatic Cholangiocarcinoma	-1.12114	0.468968	-2.39066	0.0168182	0.406741
AKT3	Breast Cancer	factor(sample_all$sex)Male	2.65191	1.10939	2.39043	0.0168288	0.406741
FAM46C	Colorectal Cancer	factor(sample_status)1	-1.77352	0.741727	-2.39107	0.0167992	0.406741
AMER1	Ovarian Cancer	factor(aya_status)1	1.89757	0.982364	1.93164	0.053404	0.670803
BARD1	Endometrial Cancer	factor(sample_subtypes)Uterine Serous Carcinoma/Uterine Papillary Serous Carcinoma	-3.4889	1.46106	-2.38792	0.0169438	0.407316
TRAF2	Endometrial Cancer	factor(sample_subtypes)Uterine Serous Carcinoma/Uterine Papillary Serous Carcinoma	-3.51462	1.47145	-2.38854	0.0169155	0.407316
HLA-B	Colorectal Cancer	factor(sample_subtypes)Rectal Adenocarcinoma	-0.763626	0.319705	-2.38854	0.0169156	0.407316
PGR	Colorectal Cancer	factor(sample_subtypes)Rectal Adenocarcinoma	-0.757845	0.317241	-2.38886	0.0169006	0.407316
PAK7	Ovarian Cancer	factor(aya_status)1	1.9071	0.991964	1.92256	0.054536	0.676718
HRAS	Bladder Cancer	factor(sample_all$sex)Male	0.862533	0.361481	2.38611	0.0170278	0.407758
XPO1	Endometrial Cancer	factor(sample_status)1	-1.29644	0.543332	-2.38609	0.0170287	0.407758
CHEK1	Colorectal Cancer	factor(sample_status)1	-0.992918	0.416044	-2.38657	0.0170063	0.407758
NCOA3	Colorectal Cancer	factor(sample_status)1	-0.597302	0.250457	-2.38485	0.0170859	0.40873
EPCAM	Colorectal Cancer	factor(aya_status)1	1.12864	0.589467	1.91468	0.0555334	0.677776
CHEK2	Colorectal Cancer	factor(sample_subtypes)Colorectal Adenocarcinoma	0.809524	0.339716	2.38294	0.0171748	0.410456
SYK	Endometrial Cancer	factor(sample_subtypes)Uterine Serous Carcinoma/Uterine Papillary Serous Carcinoma	-3.48476	1.46322	-2.38157	0.0172392	0.410794
AXIN2	Endometrial Cancer	factor(sample_subtypes)Uterine Serous Carcinoma/Uterine Papillary Serous Carcinoma	-3.46861	1.45631	-2.38178	0.0172292	0.410794
TRAF7	Pancreatic Cancer	factor(sample_subtypes)Pancreatic Neuroendocrine Tumor	-3.0978	1.3006	-2.38181	0.0172276	0.410794
MST1R	Ovarian Cancer	factor(sample_subtypes)High-Grade Serous Ovarian Cancer	-1.54926	0.650999	-2.37981	0.0173215	0.412356
FLCN	Bladder Cancer	factor(sample_subtypes)Upper Tract Urothelial Carcinoma	1.17578	0.494256	2.37888	0.0173653	0.412998
E2F3	Colorectal Cancer	factor(aya_status)1	0.827063	0.432579	1.91194	0.0558844	0.679695
MET	Melanoma	factor(sample_subtypes)Melanoma of Unknown Primary	2.49146	1.04796	2.37743	0.0174337	0.413025
IKZF1	Melanoma	factor(sample_subtypes)Cutaneous Melanoma	2.41673	1.01623	2.37814	0.0174001	0.413025
GSK3B	Non-Small Cell Lung Cancer	factor(sample_all$sex)Male	-1.0498	0.441561	-2.37748	0.0174314	0.413025
SDHA	Colorectal Cancer	factor(sample_status)1	-0.993115	0.417708	-2.37753	0.0174288	0.413025
PIK3CA	Soft Tissue Sarcoma	factor(sample_status)1	1.33858	0.563373	2.37601	0.017501	0.414218
ARID2	Ovarian Cancer	factor(aya_status)1	1.85772	0.974012	1.90729	0.056483	0.683725
KDM6A	Bladder Cancer	factor(sample_all$sex)Male	-0.322475	0.135755	-2.37542	0.0175292	0.414486
PARK2	Non-Small Cell Lung Cancer	factor(sample_status)1	0.482453	0.20329	2.37323	0.0176335	0.416551
EGFR	Endometrial Cancer	factor(sample_subtypes)Uterine Serous Carcinoma/Uterine Papillary Serous Carcinoma	-3.45109	1.45614	-2.37002	0.0177869	0.4182
JAK2	Non-Small Cell Lung Cancer	factor(sample_status)1	0.483296	0.203809	2.37131	0.0177249	0.4182
FOXL2	Breast Cancer	factor(sample_subtypes)Breast Invasive Ductal Carcinoma	-2.64035	1.11389	-2.37038	0.01777	0.4182
NCOR1	Pancreatic Cancer	factor(sample_status)1	1.17022	0.493764	2.36999	0.0177885	0.4182
RNF43	Endometrial Cancer	factor(sample_status)1	-0.632276	0.266864	-2.36928	0.0178226	0.418602
MET	Colorectal Cancer	factor(aya_status)1	0.616685	0.32471	1.89919	0.0575398	0.69001
NOTCH1	Melanoma	factor(sample_all$sex)Male	0.659511	0.278479	2.36826	0.017872	0.41936
MGA	Breast Cancer	factor(sample_status)1	0.637789	0.269413	2.36733	0.0179169	0.420011
FBXW7	Endometrial Cancer	factor(sample_status)1	-0.427743	0.180764	-2.36631	0.0179663	0.420366
DDR2	Melanoma	factor(sample_all$sex)Male	1.16562	0.492544	2.36652	0.0179561	0.420366
NKX2-1	Colorectal Cancer	factor(sample_status)1	-0.836425	0.354033	-2.36256	0.018149	0.421697
RAD54L	Endometrial Cancer	factor(sample_subtypes)Uterine Serous Carcinoma/Uterine Papillary Serous Carcinoma	-3.45865	1.46301	-2.36407	0.0180755	0.421697
TET1	Colorectal Cancer	factor(sample_status)1	-0.497686	0.210497	-2.36434	0.0180621	0.421697
TET1	Melanoma	factor(sample_all$sex)Male	0.710048	0.300571	2.36233	0.0181606	0.421697
TP53	Endometrial Cancer	factor(aya_status)1	-1.55082	0.818227	-1.89534	0.0580473	0.693022
INPP4A	Melanoma	factor(sample_all$sex)Male	1.001	0.423686	2.36259	0.0181479	0.421697
DROSHA	Colorectal Cancer	factor(sample_status)1	-0.702865	0.297312	-2.36406	0.0180757	0.421697
MYCN	Colorectal Cancer	factor(sample_subtypes)Rectal Adenocarcinoma	-1.03659	0.438875	-2.36193	0.0181803	0.421756
FGFR3	Bladder Cancer	factor(sample_all$sex)Male	-0.332778	0.140932	-2.36128	0.0182122	0.422096
NOTCH1	Head and Neck Cancer	factor(sample_status)1	-0.628659	0.26638	-2.36001	0.0182747	0.42296
LMO1	Colorectal Cancer	factor(sample_all$sex)Male	1.78804	0.757911	2.35917	0.0183157	0.42296
GLI1	Colorectal Cancer	factor(sample_subtypes)Rectal Adenocarcinoma	-0.579597	0.245622	-2.35971	0.0182892	0.42296
KMT2A	Breast Cancer	factor(aya_status)1	-1.91248	1.01123	-1.89124	0.0585924	0.693606
PDCD1	Colorectal Cancer	factor(sample_subtypes)Rectal Adenocarcinoma	-0.960308	0.407122	-2.35877	0.0183356	0.42296
ZFHX3	Bladder Cancer	factor(sample_subtypes)Upper Tract Urothelial Carcinoma	0.576641	0.244467	2.35877	0.0183356	0.42296
KMT2D	Colorectal Cancer	factor(sample_subtypes)Colorectal Adenocarcinoma	-0.425309	0.180373	-2.35795	0.0183764	0.423106
ANKRD11	Colorectal Cancer	factor(sample_subtypes)Colorectal Adenocarcinoma	-0.604484	0.256451	-2.35711	0.0184177	0.423659
KMT2B	Endometrial Cancer	factor(aya_status)1	-1.9422	1.02734	-1.89051	0.0586892	0.693606
ATRX	Breast Cancer	factor(sample_subtypes)Breast Invasive Ductal Carcinoma	-1.93587	0.821527	-2.35642	0.0184519	0.423859
BARD1	Non-Small Cell Lung Cancer	factor(sample_status)1	0.56694	0.240612	2.35624	0.0184609	0.423859
RB1	Breast Cancer	factor(sample_subtypes)Breast Invasive Lobular Carcinoma	-1.99674	0.847771	-2.35529	0.0185083	0.424382
ALOX12B	Colorectal Cancer	factor(sample_status)1	-0.832872	0.353648	-2.35509	0.0185183	0.424382
ARID5B	Colorectal Cancer	factor(aya_status)1	0.567317	0.300603	1.88727	0.0591245	0.69633
FLT3	Melanoma	factor(sample_subtypes)Melanoma of Unknown Primary	2.44411	1.03938	2.35151	0.0186976	0.424527
PIK3R1	Non-Small Cell Lung Cancer	factor(sample_status)1	-0.616292	0.261995	-2.35231	0.0186573	0.424527
HNF1A	Colorectal Cancer	factor(sample_subtypes)others	1.90063	0.807643	2.35331	0.0186073	0.424527
MYCL	Endometrial Cancer	factor(sample_subtypes)Uterine Endometrioid Carcinoma	-2.86217	1.21715	-2.35153	0.0186963	0.424527
LATS2	Breast Cancer	factor(aya_status)1	0.80605	0.429773	1.87553	0.0607203	0.703313
SOX9	Ovarian Cancer	factor(sample_subtypes)High-Grade Serous Ovarian Cancer	-2.07848	0.883789	-2.35179	0.0186834	0.424527
TMPRSS2	Melanoma	factor(sample_all$sex)Male	0.931639	0.396187	2.35152	0.0186971	0.424527
GRIN2A	Colorectal Cancer	factor(sample_status)1	-0.376457	0.159974	-2.35324	0.0186107	0.424527
TP63	Endometrial Cancer	factor(sample_subtypes)Uterine Endometrioid Carcinoma	-1.997	0.84886	-2.35257	0.0186443	0.424527
ANKRD11	Melanoma	factor(sample_subtypes)Melanoma of Unknown Primary	2.48193	1.05493	2.35269	0.0186384	0.424527
MED12	Endometrial Cancer	factor(sample_subtypes)Uterine Carcinosarcoma/Uterine Malignant Mixed Mullerian Tumor	-2.07188	0.881666	-2.34996	0.0187754	0.425899
KDM5A	Ovarian Cancer	factor(aya_status)1	1.79985	0.96003	1.87478	0.060823	0.703916
NOTCH2	Colorectal Cancer	factor(sample_subtypes)Rectal Adenocarcinoma	-0.695893	0.29625	-2.34901	0.0188235	0.426595
JUN	Colorectal Cancer	factor(sample_subtypes)Colorectal Adenocarcinoma	-1.69681	0.722555	-2.34835	0.018857	0.426727
DNMT1	Colorectal Cancer	factor(sample_status)1	-0.509148	0.21689	-2.34749	0.0189004	0.427156
NRAS	Melanoma	factor(sample_subtypes)Melanoma of Unknown Primary	0.896594	0.382292	2.34531	0.0190111	0.427381
NF1	Gastrointestinal Stromal Tumor	factor(sample_all$sex)Male	-1.26247	0.538217	-2.34566	0.0189934	0.427381
NTRK1	Colorectal Cancer	factor(aya_status)1	0.52418	0.280309	1.87001	0.0614829	0.708467
FLT1	Melanoma	factor(sample_all$sex)Male	0.487667	0.207973	2.34486	0.0190342	0.427381
TRAF7	Melanoma	factor(sample_status)1	-0.830041	0.353942	-2.34513	0.0190204	0.427381
PIK3CB	Non-Small Cell Lung Cancer	factor(sample_all$sex)Male	0.660178	0.281498	2.34523	0.0190155	0.427381
ERF	Non-Small Cell Lung Cancer	factor(sample_status)1	0.968809	0.413216	2.34456	0.0190496	0.427381
LATS1	Breast Cancer	factor(sample_subtypes)Breast Invasive Ductal Carcinoma	-2.10699	0.899118	-2.34339	0.0191092	0.428325
PTPRT	Esophagogastric Cancer	factor(sample_all$sex)Male	1.06041	0.452706	2.34239	0.0191608	0.429089
INHBA	Endometrial Cancer	factor(sample_subtypes)Uterine Serous Carcinoma/Uterine Papillary Serous Carcinoma	-3.43374	1.46633	-2.34172	0.019195	0.429464
HIST1H3G	Bladder Cancer	factor(aya_status)1	2.06034	1.10309	1.86778	0.0617925	0.710108
RPTOR	Colorectal Cancer	factor(sample_subtypes)Rectal Adenocarcinoma	-0.770491	0.329248	-2.34016	0.0192756	0.430876
BMPR1A	Non-Small Cell Lung Cancer	factor(sample_all$sex)Male	0.976322	0.417393	2.33909	0.0193306	0.43171
BRAF	Melanoma	factor(sample_subtypes)Head and Neck Mucosal Melanoma	1.62273	0.694126	2.3378	0.0193974	0.431726
NTRK1	Non-Small Cell Lung Cancer	factor(sample_status)1	0.436705	0.186776	2.33813	0.0193807	0.431726
PRDM1	Melanoma	factor(sample_all$sex)Male	0.70275	0.300613	2.33772	0.0194016	0.431726
PIK3CG	Colorectal Cancer	factor(sample_subtypes)Rectal Adenocarcinoma	-0.537648	0.229946	-2.33815	0.0193795	0.431726
FLT1	Endometrial Cancer	factor(sample_status)1	-0.914493	0.391329	-2.33689	0.0194448	0.432133
GREM1	Endometrial Cancer	factor(sample_subtypes)Uterine Endometrioid Carcinoma	-2.84848	1.21902	-2.33669	0.0194551	0.432133
SPRED1	Ovarian Cancer	factor(aya_status)1	2.50801	1.3437	1.86649	0.0619724	0.710108
ARID2	Non-Small Cell Lung Cancer	factor(sample_all$sex)Male	0.323186	0.138388	2.33536	0.0195246	0.433283
YES1	Endometrial Cancer	factor(sample_subtypes)Uterine Endometrioid Carcinoma	-1.94943	0.835065	-2.33446	0.0195714	0.433931
BCL6	Breast Cancer	factor(sample_all$sex)Male	2.57013	1.10166	2.33296	0.0196504	0.435287
POLE	Non-Small Cell Lung Cancer	factor(sample_all$sex)Male	0.356663	0.152945	2.33197	0.0197024	0.435597
VEGFA	Endometrial Cancer	factor(sample_subtypes)Uterine Carcinosarcoma/Uterine Malignant Mixed Mullerian Tumor	-3.55955	1.52635	-2.33206	0.0196974	0.435597
FAM58A	Endometrial Cancer	factor(sample_subtypes)Uterine Serous Carcinoma/Uterine Papillary Serous Carcinoma	-3.49363	1.49833	-2.33168	0.0197176	0.435597
AXL	Melanoma	factor(sample_all$sex)Male	0.639047	0.274169	2.33086	0.0197609	0.436162
PRDM14	Ovarian Cancer	factor(aya_status)1	2.50801	1.3437	1.86649	0.0619724	0.710108
EPHA7	Breast Cancer	factor(sample_all$sex)Male	1.86864	0.802335	2.329	0.019859	0.43754
CDKN2A	Head and Neck Cancer	factor(sample_subtypes)Oropharynx Squamous Cell Carcinoma	-1.1167	0.479549	-2.32864	0.0198779	0.437564
INPPL1	Colorectal Cancer	factor(sample_subtypes)Colorectal Adenocarcinoma	-0.731507	0.314289	-2.3275	0.0199389	0.438512
TP53	Pancreatic Cancer	factor(sample_subtypes)Pancreatic Neuroendocrine Tumor	-2.72376	1.17082	-2.32638	0.0199986	0.439431
INPPL1	Ovarian Cancer	factor(aya_status)1	2.58142	1.38348	1.86589	0.062057	0.710414
PBRM1	Pancreatic Cancer	factor(sample_status)1	0.860051	0.369824	2.32557	0.0200417	0.439984
ARID1A	Head and Neck Cancer	factor(sample_subtypes)Oropharynx Squamous Cell Carcinoma	-2.45308	1.05511	-2.32495	0.0200747	0.440316
CDC73	Endometrial Cancer	factor(sample_status)1	-1.45268	0.625146	-2.32374	0.0201395	0.440382
MAP2K4	Melanoma	factor(sample_status)1	-1.10936	0.477406	-2.32372	0.0201405	0.440382
INSR	Colorectal Cancer	factor(aya_status)1	0.583167	0.312875	1.86389	0.0623365	0.712948
KDM5C	Renal Cell Carcinoma	factor(sample_status)1	0.673268	0.289721	2.32385	0.0201338	0.440382
ANKRD11	Melanoma	factor(sample_status)1	-0.605373	0.260538	-2.32355	0.0201495	0.440382
MAPK1	Non-Small Cell Lung Cancer	factor(sample_status)1	1.29039	0.555723	2.32201	0.0202325	0.441803
GNAS	Endometrial Cancer	factor(sample_subtypes)Uterine Serous Carcinoma/Uterine Papillary Serous Carcinoma	-3.01885	1.30047	-2.32135	0.0202681	0.442187
GLI1	Non-Small Cell Lung Cancer	factor(sample_subtypes)Lung Adenocarcinoma	-1.01187	0.436094	-2.32029	0.020325	0.443035
BRCA2	Colorectal Cancer	factor(aya_status)1	0.384836	0.206581	1.86288	0.0624795	0.714251
ZFHX3	Melanoma	factor(sample_subtypes)Cutaneous Melanoma	2.35738	1.01633	2.31951	0.0203673	0.443562
IKZF1	Colorectal Cancer	factor(sample_subtypes)Colorectal Adenocarcinoma	-0.817585	0.352535	-2.31916	0.0203863	0.443584
FGFR3	Colorectal Cancer	factor(sample_subtypes)Rectal Adenocarcinoma	-0.76697	0.33093	-2.31762	0.0204701	0.444424
RAF1	Colorectal Cancer	factor(sample_subtypes)Rectal Adenocarcinoma	-0.891939	0.384879	-2.31745	0.0204793	0.444424
EGFR	Hepatobiliary Cancer	factor(sample_subtypes)Intrahepatic Cholangiocarcinoma	-2.6251	1.13294	-2.31708	0.0204993	0.444466
FOXP1	Colorectal Cancer	factor(sample_status)1	-0.568465	0.245419	-2.3163	0.0205419	0.444997
FLT4	Colorectal Cancer	factor(sample_subtypes)Rectal Adenocarcinoma	-0.487303	0.210449	-2.31554	0.0205835	0.445503
VEGFA	Endometrial Cancer	factor(sample_subtypes)Uterine Endometrioid Carcinoma	-2.79508	1.20767	-2.31444	0.0206433	0.446087
ESR1	Colorectal Cancer	factor(aya_status)1	0.506336	0.271915	1.86211	0.062588	0.714825
ERCC3	Breast Cancer	factor(sample_subtypes)Breast Invasive Ductal Carcinoma	-3.00215	1.29717	-2.31438	0.0206468	0.446087
BRAF	Breast Cancer	factor(sample_subtypes)Breast Invasive Ductal Carcinoma	-2.55489	1.1041	-2.314	0.0206676	0.446144
RICTOR	Colorectal Cancer	factor(sample_subtypes)Rectal Adenocarcinoma	-0.737951	0.319021	-2.31317	0.020713	0.446732
IRF4	Breast Cancer	factor(sample_subtypes)Breast Invasive Lobular Carcinoma	-2.97507	1.28721	-2.31126	0.0208184	0.44861
IRS2	Endometrial Cancer	factor(sample_subtypes)Uterine Carcinosarcoma/Uterine Malignant Mixed Mullerian Tumor	-2.09244	0.90549	-2.31084	0.0208418	0.44872
ROS1	Colorectal Cancer	factor(sample_all$sex)Male	0.427189	0.184924	2.31007	0.0208841	0.448843
MET	Melanoma	factor(sample_subtypes)Cutaneous Melanoma	2.3518	1.0183	2.30954	0.0209138	0.448949
HIST1H3B	Ovarian Cancer	factor(aya_status)1	2.55228	1.3716	1.86081	0.0627715	0.715922
BIRC3	Non-Small Cell Lung Cancer	factor(sample_all$sex)Male	0.81923	0.354749	2.30932	0.0209256	0.448949
PDCD1	Colorectal Cancer	factor(sample_status)1	-0.678914	0.294168	-2.30791	0.0210042	0.449849
IKZF1	Colorectal Cancer	factor(sample_status)1	-0.480874	0.208424	-2.30719	0.0210442	0.450313
EPCAM	Non-Small Cell Lung Cancer	factor(sample_subtypes)Lung Adenocarcinoma	-1.75706	0.76169	-2.3068	0.0210662	0.45039
EPHA7	Melanoma	factor(aya_status)1	-0.716561	0.385332	-1.85959	0.0629433	0.715999
BCOR	Endometrial Cancer	factor(sample_subtypes)Uterine Serous Carcinoma/Uterine Papillary Serous Carcinoma	-3.33996	1.44995	-2.30351	0.0212502	0.453141
AKT2	Non-Small Cell Lung Cancer	factor(sample_status)1	0.809152	0.351267	2.30353	0.0212492	0.453141
EPHB1	Breast Cancer	factor(sample_status)1	0.878311	0.38128	2.30358	0.021246	0.453141
PDGFRA	Melanoma	factor(sample_status)1	0.736007	0.319969	2.30024	0.0214344	0.45595
KMT2D	Ovarian Cancer	factor(aya_status)1	1.19298	0.645391	1.84847	0.0645347	0.723268
KMT2D	Soft Tissue Sarcoma	factor(sample_subtypes)Undifferentiated Pleomorphic Sarcoma/Malignant Fibrous Histiocytoma/High-Grade Spindle Cell Sarcoma	1.51436	0.658341	2.30027	0.021433	0.45595
ERCC3	Non-Small Cell Lung Cancer	factor(sample_status)1	0.661993	0.2878	2.30019	0.0214377	0.45595
KIT	Melanoma	factor(sample_subtypes)Head and Neck Mucosal Melanoma	-1.34285	0.58396	-2.29955	0.0214735	0.456009
SESN2	Colorectal Cancer	factor(sample_subtypes)Rectal Adenocarcinoma	-1.69012	0.735002	-2.29948	0.0214776	0.456009
TMPRSS2	Bladder Cancer	factor(aya_status)1	2.01215	1.08866	1.84828	0.0645615	0.723268
KMT2D	Soft Tissue Sarcoma	factor(sample_subtypes)Myxofibrosarcoma	1.80702	0.786184	2.29847	0.0215351	0.456835
MYOD1	Non-Small Cell Lung Cancer	factor(sample_all$sex)Male	0.57832	0.251869	2.29612	0.0216692	0.459283
EPHA7	Colorectal Cancer	factor(sample_status)1	-0.504747	0.220176	-2.29247	0.0218787	0.463322
SMARCB1	Breast Cancer	factor(sample_all$sex)Male	2.5217	1.10105	2.29027	0.0220056	0.465206
ASXL1	Colorectal Cancer	factor(sample_subtypes)Colorectal Adenocarcinoma	-0.680185	0.297082	-2.28955	0.0220473	0.465687
POLD1	Bladder Cancer	factor(aya_status)1	1.44419	0.781893	1.84704	0.0647417	0.723268
ERBB2	Non-Small Cell Lung Cancer	factor(sample_subtypes)Lung Squamous Cell Carcinoma	-1.30654	0.570733	-2.28923	0.0220663	0.465687
HIST1H2BD	Colorectal Cancer	factor(sample_all$sex)Male	1.07045	0.467814	2.2882	0.0221257	0.466542
TET1	Non-Small Cell Lung Cancer	factor(sample_subtypes)Lung Adenocarcinoma	-0.925617	0.404927	-2.28589	0.022261	0.46899
FGFR1	Non-Small Cell Lung Cancer	factor(sample_status)1	0.61954	0.271211	2.28435	0.0223511	0.470102
EP300	Hepatobiliary Cancer	factor(sample_subtypes)others	2.57534	1.12813	2.28284	0.0224401	0.471145
CDH1	Esophagogastric Cancer	factor(sample_all$sex)Male	-0.629553	0.27618	-2.2795	0.0226375	0.47247
FLT1	Colorectal Cancer	factor(sample_status)1	-0.540269	0.237013	-2.27949	0.0226379	0.47247
TEK	Ovarian Cancer	factor(aya_status)1	2.39595	1.30125	1.84126	0.0655836	0.726025
STAT3	Breast Cancer	factor(sample_status)1	1.35902	0.595934	2.28049	0.0225784	0.47247
PIK3CG	Breast Cancer	factor(sample_subtypes)Breast Invasive Lobular Carcinoma	-1.90723	0.836533	-2.27992	0.0226124	0.47247
POLD1	Endometrial Cancer	factor(sample_status)1	-0.820833	0.360029	-2.2799	0.0226133	0.47247
FBXW7	Non-Small Cell Lung Cancer	factor(sample_all$sex)Male	0.46139	0.202563	2.27776	0.0227411	0.473663
PGR	Melanoma	factor(sample_status)1	-0.629175	0.27625	-2.27756	0.022753	0.473663
MAPKAP1	Non-Small Cell Lung Cancer	factor(sample_all$sex)Male	1.01825	0.446981	2.27805	0.0227237	0.473663
CHEK1	Esophagogastric Cancer	factor(sample_status)1	2.53507	1.11361	2.27644	0.0228196	0.473844
KMT2C	Esophagogastric Cancer	factor(sample_all$sex)Male	-0.894689	0.393019	-2.27645	0.0228191	0.473844
IL10	Bladder Cancer	factor(aya_status)1	2.05104	1.11313	1.8426	0.0653876	0.726025
PREX2	Melanoma	factor(sample_subtypes)others	2.11075	0.927128	2.27666	0.0228068	0.473844
MED12	Endometrial Cancer	factor(sample_subtypes)Uterine Serous Carcinoma/Uterine Papillary Serous Carcinoma	-1.92645	0.846452	-2.27591	0.0228513	0.474102
SMAD4	Non-Small Cell Lung Cancer	factor(sample_status)1	0.331957	0.145922	2.27488	0.0229129	0.474742
DOT1L	Ovarian Cancer	factor(sample_subtypes)High-Grade Serous Ovarian Cancer	-1.7644	0.775645	-2.27475	0.0229208	0.474742
TGFBR2	Hepatobiliary Cancer	factor(sample_subtypes)Intrahepatic Cholangiocarcinoma	-1.22639	0.539431	-2.27349	0.0229965	0.475506
RB1	Bladder Cancer	factor(sample_all$sex)Male	0.461496	0.203097	2.2723	0.0230686	0.475795
SMARCB1	Non-Small Cell Lung Cancer	factor(sample_all$sex)Male	0.753573	0.33156	2.27281	0.0230375	0.475795
MYC	Endometrial Cancer	factor(aya_status)1	1.17236	0.639812	1.83236	0.0668982	0.734653
TP63	Melanoma	factor(sample_all$sex)Male	0.409364	0.180132	2.27258	0.0230517	0.475795
APC	Hepatobiliary Cancer	factor(sample_subtypes)Intrahepatic Cholangiocarcinoma	-1.55788	0.686	-2.27096	0.0231493	0.477059
STK11	Non-Small Cell Lung Cancer	factor(sample_subtypes)Non-Small Cell Lung Cancer	-1.31347	0.578747	-2.26951	0.0232373	0.47847
GNAQ	Colorectal Cancer	factor(sample_status)1	-2.32864	1.02653	-2.26845	0.0233017	0.478993
EZH1	Colorectal Cancer	factor(sample_status)1	-1.38304	0.609622	-2.26869	0.0232874	0.478993
APC	Colorectal Cancer	factor(sample_status)1	0.186378	0.0823167	2.26416	0.0235645	0.48318
TP63	Colorectal Cancer	factor(aya_status)1	0.620621	0.338947	1.83103	0.0670967	0.735577
PIK3C2G	Endometrial Cancer	factor(sample_status)1	-1.01633	0.448861	-2.26424	0.0235596	0.48318
PIK3C2G	Endometrial Cancer	factor(sample_subtypes)Uterine Carcinosarcoma/Uterine Malignant Mixed Mullerian Tumor	-3.32347	1.46751	-2.2647	0.0235311	0.48318
CARD11	Bladder Cancer	factor(sample_all$sex)Male	2.3111	1.02132	2.26285	0.0236447	0.483614
ERCC2	Bladder Cancer	factor(sample_subtypes)Upper Tract Urothelial Carcinoma	-0.686929	0.30363	-2.26239	0.0236735	0.483799
NBN	Ovarian Cancer	factor(aya_status)1	2.4444	1.33557	1.83023	0.0672154	0.73616
FANCA	Colorectal Cancer	factor(sample_status)1	-0.54605	0.241396	-2.26205	0.0236945	0.483825
ERRFI1	Colorectal Cancer	factor(sample_all$sex)Male	0.987076	0.436533	2.26117	0.0237485	0.484524
MITF	Colorectal Cancer	factor(sample_status)1	-0.663244	0.293815	-2.25736	0.0239858	0.488599
KMT2D	Thyroid Cancer	factor(sample_subtypes)Papillary Thyroid Cancer	-3.00275	1.33077	-2.2564	0.0240455	0.488934
NTRK3	Non-Small Cell Lung Cancer	factor(sample_all$sex)Male	0.287194	0.127297	2.2561	0.0240642	0.488934
DOT1L	Colorectal Cancer	factor(sample_subtypes)Rectal Adenocarcinoma	-0.566082	0.250845	-2.2567	0.0240269	0.488934
FAM175A	Colorectal Cancer	factor(sample_status)1	-1.38697	0.614974	-2.25533	0.0241123	0.489101
EPAS1	Ovarian Cancer	factor(aya_status)1	2.80451	1.53351	1.82881	0.0674277	0.736679
CHEK2	Breast Cancer	factor(sample_subtypes)Breast Invasive Lobular Carcinoma	-3.277	1.45373	-2.2542	0.0241836	0.489738
KDM5A	Pancreatic Cancer	factor(sample_status)1	1.21423	0.538632	2.25428	0.0241784	0.489738
ASXL1	Thyroid Cancer	factor(sample_subtypes)Papillary Thyroid Cancer	-3.0285	1.34416	-2.25308	0.024254	0.490758
CHEK2	Breast Cancer	factor(sample_subtypes)Breast Invasive Ductal Carcinoma	-2.48445	1.10299	-2.25247	0.0242924	0.491132
TEK	Melanoma	factor(aya_status)1	-1.33211	0.731402	-1.82131	0.0685598	0.741618
FOXL2	Colorectal Cancer	factor(sample_subtypes)Rectal Adenocarcinoma	-1.36486	0.606287	-2.25118	0.0243742	0.491974
FLT4	Colorectal Cancer	factor(sample_status)1	-0.393151	0.174671	-2.2508	0.024398	0.492049
ERBB4	Endometrial Cancer	factor(sample_subtypes)Uterine Serous Carcinoma/Uterine Papillary Serous Carcinoma	-2.86994	1.27559	-2.24989	0.0244557	0.492809
NF1	Endometrial Cancer	factor(sample_status)1	-0.602028	0.267631	-2.24947	0.0244826	0.492946
MST1	Colorectal Cancer	factor(aya_status)1	1.26268	0.695751	1.81485	0.0695477	0.747363
KEAP1	Non-Small Cell Lung Cancer	factor(sample_subtypes)others	-2.34962	1.04508	-2.24828	0.0245586	0.494072
IFNGR1	Colorectal Cancer	factor(sample_status)1	-1.38259	0.615131	-2.24764	0.0245993	0.49408
KDR	Non-Small Cell Lung Cancer	factor(sample_subtypes)Lung Squamous Cell Carcinoma	-0.920922	0.41002	-2.24604	0.0247013	0.49499
TSC2	Esophagogastric Cancer	factor(sample_subtypes)Stomach Adenocarcinoma	-2.55225	1.13651	-2.2457	0.024723	0.49499
MAP2K2	Colorectal Cancer	factor(sample_subtypes)others	2.4531	1.09253	2.24535	0.0247455	0.49499
CIC	Melanoma	factor(aya_status)1	-1.31585	0.726297	-1.81173	0.0700284	0.750813
MST1R	Colorectal Cancer	factor(sample_status)1	-0.556256	0.247714	-2.24556	0.0247324	0.49499
EGFR	Non-Small Cell Lung Cancer	factor(sample_status)1	0.140999	0.0628232	2.24438	0.0248078	0.495833
HRAS	Endometrial Cancer	factor(sample_subtypes)Uterine Serous Carcinoma/Uterine Papillary Serous Carcinoma	-3.32086	1.48024	-2.24346	0.0248673	0.496213
BBC3	Colorectal Cancer	factor(sample_all$sex)Male	-1.08987	0.485784	-2.24352	0.0248632	0.496213
KIT	Germ Cell Tumor	factor(sample_status)1	-1.306	0.582628	-2.24157	0.0249893	0.497434
ERBB3	Endometrial Cancer	factor(sample_subtypes)Uterine Serous Carcinoma/Uterine Papillary Serous Carcinoma	-1.91096	0.85239	-2.24189	0.0249687	0.497434
IKBKE	Melanoma	factor(sample_status)1	-0.989475	0.441397	-2.24169	0.0249814	0.497434
SMAD4	Non-Small Cell Lung Cancer	factor(aya_status)1	0.728783	0.402633	1.81005	0.0702888	0.750853
CSF1R	Colorectal Cancer	factor(sample_subtypes)Rectal Adenocarcinoma	-0.815564	0.363955	-2.24084	0.0250365	0.497567
SYK	Colorectal Cancer	factor(sample_status)1	-0.835605	0.372858	-2.24108	0.0250206	0.497567
PIK3CA	Hepatobiliary Cancer	factor(sample_subtypes)Gallbladder Cancer	1.32277	0.590437	2.24033	0.0250698	0.49775
NCOR1	Endometrial Cancer	factor(sample_subtypes)Uterine Carcinosarcoma/Uterine Malignant Mixed Mullerian Tumor	-3.27393	1.46153	-2.24007	0.0250862	0.49775
ATM	Ovarian Cancer	factor(sample_subtypes)High-Grade Serous Ovarian Cancer	-1.11653	0.498729	-2.23874	0.0251727	0.499062
GNAS	Endometrial Cancer	factor(sample_subtypes)Uterine Carcinosarcoma/Uterine Malignant Mixed Mullerian Tumor	-3.31229	1.48005	-2.23796	0.0252239	0.49927
TGFBR2	Hepatobiliary Cancer	factor(sample_status)1	1.07752	0.481413	2.23824	0.0252054	0.49927
PAK7	Colorectal Cancer	factor(sample_status)1	-0.681383	0.304651	-2.2366	0.0253125	0.50062
WHSC1L1	Colorectal Cancer	factor(aya_status)1	0.5913	0.326691	1.80997	0.0703007	0.750853
RBM10	Endometrial Cancer	factor(sample_status)1	-1.09649	0.490421	-2.23581	0.0253644	0.501242
LATS2	Non-Small Cell Lung Cancer	factor(sample_subtypes)Lung Adenocarcinoma	-1.18558	0.530525	-2.23473	0.0254348	0.502229
JAK2	Endometrial Cancer	factor(sample_subtypes)Uterine Carcinosarcoma/Uterine Malignant Mixed Mullerian Tumor	-3.27281	1.46609	-2.23234	0.0255923	0.504263
AURKA	Endometrial Cancer	factor(sample_subtypes)Uterine Serous Carcinoma/Uterine Papillary Serous Carcinoma	-3.27046	1.46582	-2.23115	0.0256714	0.504263
BAP1	Colorectal Cancer	factor(sample_status)1	-0.757114	0.339362	-2.23099	0.0256816	0.504263
CIC	Non-Small Cell Lung Cancer	factor(sample_all$sex)Male	0.457493	0.20504	2.23124	0.0256654	0.504263
FOXA1	Endometrial Cancer	factor(sample_status)1	-1.40033	0.627376	-2.23204	0.0256124	0.504263
PIK3R2	Ovarian Cancer	factor(aya_status)1	2.39406	1.32355	1.80881	0.0704799	0.752113
MGA	Breast Cancer	factor(sample_subtypes)Breast Invasive Lobular Carcinoma	-1.98803	0.890868	-2.23157	0.0256436	0.504263
ICOSLG	Bladder Cancer	factor(sample_subtypes)Upper Tract Urothelial Carcinoma	1.33331	0.597576	2.2312	0.0256676	0.504263
ARAF	Colorectal Cancer	factor(sample_subtypes)Rectal Adenocarcinoma	-0.853263	0.38281	-2.22894	0.0258177	0.505593
MSH2	Endometrial Cancer	factor(sample_subtypes)Uterine Carcinosarcoma/Uterine Malignant Mixed Mullerian Tumor	-3.26017	1.46274	-2.22881	0.0258267	0.505593
TMPRSS2	Breast Cancer	factor(sample_status)1	1.79603	0.805897	2.22861	0.02584	0.505593
XRCC2	Colorectal Cancer	factor(sample_subtypes)Rectal Adenocarcinoma	-1.63931	0.735635	-2.22842	0.0258523	0.505593
EZH1	Endometrial Cancer	factor(sample_subtypes)Uterine Endometrioid Carcinoma	-2.78537	1.24926	-2.22963	0.0257721	0.505593
EPHA5	Colorectal Cancer	factor(aya_status)1	0.384669	0.212691	1.80858	0.0705162	0.752173
WWTR1	Endometrial Cancer	factor(sample_subtypes)Uterine Serous Carcinoma/Uterine Papillary Serous Carcinoma	-2.93756	1.31886	-2.22735	0.0259239	0.506186
BCL6	Colorectal Cancer	factor(sample_subtypes)Rectal Adenocarcinoma	-0.980519	0.440683	-2.225	0.0260814	0.507829
FLT4	Endometrial Cancer	factor(sample_status)1	-0.812198	0.365034	-2.22499	0.0260818	0.507829
FOXL2	Non-Small Cell Lung Cancer	factor(sample_status)1	0.626758	0.281674	2.22512	0.0260733	0.507829
ASXL2	Melanoma	factor(aya_status)1	-1.83588	1.0155	-1.80785	0.07063	0.752406
TP53BP1	Non-Small Cell Lung Cancer	factor(sample_subtypes)Lung Adenocarcinoma	-1.37113	0.616278	-2.22486	0.0260908	0.507829
FLT3	Non-Small Cell Lung Cancer	factor(sample_status)1	0.455181	0.204674	2.22393	0.0261532	0.5083
ARID1A	Breast Cancer	factor(sample_all$sex)Male	1.09948	0.494467	2.22357	0.0261771	0.5083
DICER1	Breast Cancer	factor(sample_status)1	0.984477	0.442726	2.22367	0.0261706	0.5083
WHSC1	Ovarian Cancer	factor(aya_status)1	2.36859	1.31084	1.80693	0.0707734	0.752971
STK11	Colorectal Cancer	factor(sample_status)1	-0.931375	0.419122	-2.22221	0.0262694	0.509689
BRAF	Colorectal Cancer	factor(sample_all$sex)Male	-0.24076	0.108443	-2.22015	0.0264089	0.509942
MED12	Colorectal Cancer	factor(sample_all$sex)Male	-0.373828	0.168357	-2.22046	0.0263879	0.509942
MGA	Esophagogastric Cancer	factor(sample_all$sex)Male	-1.23369	0.555827	-2.21956	0.0264486	0.509942
WHSC1L1	Endometrial Cancer	factor(sample_subtypes)Uterine Serous Carcinoma/Uterine Papillary Serous Carcinoma	-3.24297	1.4601	-2.22107	0.0263462	0.509942
PRKD1	Ovarian Cancer	factor(aya_status)1	2.36859	1.31084	1.80693	0.0707734	0.752971
DNMT1	Bladder Cancer	factor(sample_subtypes)Upper Tract Urothelial Carcinoma	0.828947	0.373457	2.21966	0.0264418	0.509942
MALT1	Endometrial Cancer	factor(sample_subtypes)Uterine Endometrioid Carcinoma	-1.8651	0.83984	-2.22078	0.0263661	0.509942
PLK2	Endometrial Cancer	factor(sample_subtypes)Uterine Endometrioid Carcinoma	-1.84688	0.831904	-2.22007	0.0264142	0.509942
ETV1	Breast Cancer	factor(sample_status)1	1.10066	0.495979	2.21917	0.0264749	0.510046
PTPRS	Renal Cell Carcinoma	factor(sample_subtypes)Renal Clear Cell Carcinoma	-2.70996	1.22198	-2.21768	0.0265768	0.511609
PDGFRB	Melanoma	factor(sample_all$sex)Male	0.621269	0.280331	2.2162	0.026678	0.513154
FGFR2	Non-Small Cell Lung Cancer	factor(sample_subtypes)Lung Adenocarcinoma	-1.35338	0.611393	-2.2136	0.0268564	0.514971
PTCH1	Breast Cancer	factor(aya_status)1	0.924249	0.512223	1.80439	0.0711707	0.753912
ARID1A	Endometrial Cancer	factor(sample_status)1	-0.337839	0.152589	-2.21405	0.0268255	0.514971
SYK	Non-Small Cell Lung Cancer	factor(sample_subtypes)Lung Squamous Cell Carcinoma	-1.83837	0.830242	-2.21426	0.0268108	0.514971
SESN3	Endometrial Cancer	factor(sample_subtypes)Uterine Serous Carcinoma/Uterine Papillary Serous Carcinoma	-3.24108	1.46416	-2.21361	0.0268557	0.514971
NFE2L2	Colorectal Cancer	factor(sample_all$sex)Male	0.909571	0.411021	2.21296	0.0269006	0.515336
PLCG2	Colorectal Cancer	factor(sample_all$sex)Male	0.411056	0.18577	2.21271	0.0269174	0.515336
KMT2C	Non-Small Cell Lung Cancer	factor(sample_all$sex)Male	0.27532	0.12449	2.21159	0.026995	0.516419
PIK3CG	Endometrial Cancer	factor(sample_subtypes)Uterine Serous Carcinoma/Uterine Papillary Serous Carcinoma	-2.81631	1.27377	-2.21101	0.0270352	0.516785
TET2	Melanoma	factor(sample_subtypes)Cutaneous Melanoma	1.33698	0.605181	2.20923	0.0271586	0.518337
GNA11	Endometrial Cancer	factor(aya_status)1	1.40601	0.781967	1.79805	0.0721695	0.757129
MSH2	Endometrial Cancer	factor(sample_status)1	-0.866452	0.392375	-2.20823	0.0272285	0.518864
MRE11A	Endometrial Cancer	factor(sample_subtypes)Uterine Carcinosarcoma/Uterine Malignant Mixed Mullerian Tumor	-3.23146	1.46333	-2.20829	0.0272243	0.518864
CDKN2A	Endometrial Cancer	factor(sample_subtypes)Uterine Serous Carcinoma/Uterine Papillary Serous Carcinoma	-3.22792	1.46235	-2.20734	0.0272901	0.519635
ARID1A	Non-Small Cell Lung Cancer	factor(sample_all$sex)Male	0.249082	0.1129	2.20622	0.0273686	0.519689
MDM2	Breast Cancer	factor(sample_status)1	1.46727	0.665204	2.20574	0.0274021	0.519689
IKBKE	Breast Cancer	factor(sample_all$sex)Male	2.4279	1.10059	2.20599	0.0273845	0.519689
INPP4B	Non-Small Cell Lung Cancer	factor(sample_subtypes)Lung Squamous Cell Carcinoma	-1.1364	0.515332	-2.20518	0.0274412	0.519689
EZH2	Ovarian Cancer	factor(aya_status)1	2.35623	1.30981	1.79891	0.0720334	0.757129
CARM1	Melanoma	factor(sample_all$sex)Male	-1.16417	0.52762	-2.20645	0.0273527	0.519689
EPHA5	Esophagogastric Cancer	factor(sample_subtypes)Stomach Adenocarcinoma	-1.2589	0.571034	-2.2046	0.0274823	0.520066
NTRK1	Colorectal Cancer	factor(sample_status)1	-0.543919	0.246814	-2.20376	0.0275412	0.520778
RAD50	Non-Small Cell Lung Cancer	factor(sample_subtypes)Lung Squamous Cell Carcinoma	-1.82379	0.82778	-2.20323	0.0275788	0.521088
INPP4A	Endometrial Cancer	factor(sample_subtypes)Uterine Serous Carcinoma/Uterine Papillary Serous Carcinoma	-3.19968	1.45258	-2.20276	0.0276118	0.521311
POLD1	Bladder Cancer	factor(sample_all$sex)Male	1.18469	0.53818	2.20129	0.0277154	0.521346
GATA1	Ovarian Cancer	factor(aya_status)1	2.35623	1.30981	1.79891	0.0720334	0.757129
MAX	Gastrointestinal Stromal Tumor	factor(sample_status)1	1.0774	0.489456	2.20123	0.0277199	0.521346
MYOD1	Colorectal Cancer	factor(sample_subtypes)Colorectal Adenocarcinoma	-1.31341	0.596429	-2.20212	0.0276571	0.521346
TGFBR1	Colorectal Cancer	factor(sample_status)1	-0.689578	0.31313	-2.20221	0.0276508	0.521346
ATM	Endometrial Cancer	factor(sample_subtypes)Uterine Carcinosarcoma/Uterine Malignant Mixed Mullerian Tumor	-1.92419	0.874398	-2.20059	0.0277651	0.521398
EED	Ovarian Cancer	factor(aya_status)1	2.35623	1.30981	1.79891	0.0720334	0.757129
CBL	Non-Small Cell Lung Cancer	factor(sample_subtypes)Lung Adenocarcinoma	-1.16952	0.531397	-2.20084	0.0277476	0.521398
STAT5B	Endometrial Cancer	factor(sample_subtypes)Uterine Serous Carcinoma/Uterine Papillary Serous Carcinoma	-3.21186	1.45999	-2.19992	0.0278124	0.521487
TERT	Non-Small Cell Lung Cancer	factor(sample_subtypes)Lung Adenocarcinoma	-1.04281	0.474336	-2.19845	0.0279168	0.523045
IL7R	Non-Small Cell Lung Cancer	factor(sample_subtypes)Lung Adenocarcinoma	-1.04519	0.475607	-2.1976	0.0279779	0.523791
NOTCH3	Ovarian Cancer	factor(aya_status)1	1.66295	0.927281	1.79336	0.0729154	0.760576
CD276	Colorectal Cancer	factor(sample_status)1	-1.0733	0.488468	-2.19728	0.0280006	0.523817
SMARCA4	Esophagogastric Cancer	factor(sample_subtypes)Esophageal Adenocarcinoma	1.01176	0.460638	2.19643	0.0280612	0.52455
PDGFRB	Melanoma	factor(sample_subtypes)Melanoma of Unknown Primary	2.30549	1.05047	2.19472	0.0281833	0.526432
SF3B1	Endometrial Cancer	factor(sample_subtypes)Uterine Endometrioid Carcinoma	-1.82351	0.831159	-2.19394	0.0282401	0.527091
CDH1	Esophagogastric Cancer	factor(aya_status)1	0.69256	0.386307	1.79277	0.0730094	0.76069
ATRX	Pancreatic Cancer	factor(sample_all$sex)Male	-0.670453	0.305954	-2.19136	0.0284261	0.53016
ATRX	Soft Tissue Sarcoma	factor(sample_subtypes)Leiomyosarcoma	1.19056	0.543562	2.1903	0.0285028	0.531187
PIK3CG	Ovarian Cancer	factor(sample_status)1	-1.77454	0.810434	-2.18961	0.0285524	0.531708
RAF1	Endometrial Cancer	factor(sample_subtypes)Uterine Serous Carcinoma/Uterine Papillary Serous Carcinoma	-2.79816	1.27862	-2.18842	0.0286393	0.531816
CIC	Hepatobiliary Cancer	factor(sample_all$sex)Male	1.45569	0.665474	2.18745	0.0287099	0.531816
FH	Endometrial Cancer	factor(sample_subtypes)Uterine Carcinosarcoma/Uterine Malignant Mixed Mullerian Tumor	-3.22004	1.47192	-2.18765	0.0286953	0.531816
KMT2C	Breast Cancer	factor(aya_status)1	-0.526475	0.294373	-1.78846	0.0737017	0.764554
EPHB1	Endometrial Cancer	factor(sample_status)1	-0.915769	0.418423	-2.18862	0.0286246	0.531816
DNMT3B	Breast Cancer	factor(sample_subtypes)Breast Invasive Ductal Carcinoma	-2.38705	1.0912	-2.18754	0.0287033	0.531816
MDC1	Colorectal Cancer	factor(sample_subtypes)Rectal Adenocarcinoma	-0.698269	0.319194	-2.1876	0.0286987	0.531816
STAT5A	Endometrial Cancer	factor(sample_subtypes)Uterine Serous Carcinoma/Uterine Papillary Serous Carcinoma	-3.20648	1.46552	-2.18795	0.0286731	0.531816
AKT1	Colorectal Cancer	factor(sample_subtypes)Rectal Adenocarcinoma	-0.893436	0.408707	-2.18601	0.0288152	0.532919
DDR2	Breast Cancer	factor(aya_status)1	0.916784	0.513414	1.78566	0.0741536	0.767296
INHBA	Colorectal Cancer	factor(sample_subtypes)Colorectal Adenocarcinoma	-1.02195	0.467554	-2.18574	0.0288346	0.532919
PRKD1	Endometrial Cancer	factor(sample_subtypes)Uterine Serous Carcinoma/Uterine Papillary Serous Carcinoma	-3.19514	1.46164	-2.186	0.0288157	0.532919
SPEN	Colorectal Cancer	factor(sample_subtypes)Rectal Adenocarcinoma	-0.463048	0.211882	-2.1854	0.0288593	0.532974
ETV6	Colorectal Cancer	factor(sample_subtypes)Rectal Adenocarcinoma	-1.04481	0.47827	-2.18456	0.0289208	0.533307
CCNE1	Colorectal Cancer	factor(sample_status)1	-1.62902	0.745607	-2.18482	0.0289021	0.533307
GRIN2A	Melanoma	factor(sample_status)1	-0.381349	0.17469	-2.183	0.0290356	0.535022
FANCC	Endometrial Cancer	factor(sample_subtypes)Uterine Carcinosarcoma/Uterine Malignant Mixed Mullerian Tumor	-3.22585	1.47848	-2.18186	0.0291196	0.536168
PIK3CG	Melanoma	factor(aya_status)1	-0.933384	0.523935	-1.78149	0.0748326	0.771192
APC	Bladder Cancer	factor(sample_subtypes)Upper Tract Urothelial Carcinoma	-0.944284	0.432885	-2.18137	0.0291559	0.536365
ERCC4	Endometrial Cancer	factor(sample_subtypes)Uterine Carcinosarcoma/Uterine Malignant Mixed Mullerian Tumor	-3.19298	1.46391	-2.18113	0.029174	0.536365
FGFR3	Non-Small Cell Lung Cancer	factor(sample_subtypes)Lung Adenocarcinoma	-1.63366	0.749278	-2.18032	0.0292341	0.536625
NOTCH1	Melanoma	factor(sample_subtypes)Melanoma of Unknown Primary	2.28975	1.05093	2.17878	0.0293484	0.537958
CTNNB1	Melanoma	factor(sample_status)1	0.698052	0.320748	2.17632	0.0295311	0.539389
ESR1	Endometrial Cancer	factor(sample_status)1	0.590241	0.271122	2.17703	0.0294783	0.539389
GATA2	Colorectal Cancer	factor(sample_subtypes)Rectal Adenocarcinoma	-0.894566	0.410987	-2.17663	0.0295083	0.539389
GLI1	Colorectal Cancer	factor(sample_subtypes)Colorectal Adenocarcinoma	-0.702952	0.32301	-2.17625	0.0295363	0.539389
RTEL1	Ovarian Cancer	factor(aya_status)1	2.31059	1.29853	1.77939	0.0751761	0.772318
INPP4B	Non-Small Cell Lung Cancer	factor(sample_all$sex)Male	0.351601	0.161559	2.1763	0.029533	0.539389
FLT3	Endometrial Cancer	factor(sample_subtypes)Uterine Carcinosarcoma/Uterine Malignant Mixed Mullerian Tumor	-3.17161	1.45909	-2.17369	0.0297282	0.541685
FANCA	Endometrial Cancer	factor(sample_subtypes)Uterine Carcinosarcoma/Uterine Malignant Mixed Mullerian Tumor	-3.17889	1.46236	-2.1738	0.0297199	0.541685
ARID1B	Non-Small Cell Lung Cancer	factor(sample_subtypes)Lung Adenocarcinoma	-0.944827	0.434809	-2.17297	0.0297828	0.541711
ETV1	Colorectal Cancer	factor(sample_subtypes)Rectal Adenocarcinoma	-0.791881	0.364453	-2.17279	0.0297959	0.541711
NF1	Thyroid Cancer	factor(sample_subtypes)Papillary Thyroid Cancer	-2.82538	1.30089	-2.17188	0.0298645	0.541755
AXIN2	Colorectal Cancer	factor(sample_subtypes)Rectal Adenocarcinoma	-0.468747	0.215771	-2.17243	0.0298234	0.541755
ETV6	Ovarian Cancer	factor(aya_status)1	2.29926	1.29323	1.77793	0.075416	0.772681
RTEL1	Non-Small Cell Lung Cancer	factor(sample_all$sex)Male	0.700376	0.322448	2.17206	0.0298513	0.541755
CDK12	Colorectal Cancer	factor(sample_subtypes)Rectal Adenocarcinoma	-0.559803	0.257838	-2.17114	0.0299204	0.542367
IFNGR1	Non-Small Cell Lung Cancer	factor(sample_all$sex)Male	0.888863	0.409494	2.17064	0.0299585	0.542657
STAG2	Endometrial Cancer	factor(sample_status)1	-0.74766	0.344606	-2.16961	0.0300366	0.543298
CUL3	Colorectal Cancer	factor(sample_all$sex)Male	0.895917	0.412943	2.16959	0.0300381	0.543298
AXIN1	Non-Small Cell Lung Cancer	factor(sample_status)1	0.591641	0.27279	2.16885	0.0300942	0.543912
CTLA4	Bladder Cancer	factor(aya_status)1	1.92565	1.08327	1.77763	0.0754642	0.772681
KIT	Endometrial Cancer	factor(sample_subtypes)Uterine Carcinosarcoma/Uterine Malignant Mixed Mullerian Tumor	-3.16734	1.46088	-2.16811	0.0301506	0.54453
FBXW7	Esophagogastric Cancer	factor(sample_all$sex)Male	1.36109	0.628701	2.16492	0.0303936	0.547637
SF3B1	Melanoma	factor(sample_subtypes)others	-1.29532	0.598157	-2.16553	0.0303474	0.547637
DOT1L	Pancreatic Cancer	factor(sample_status)1	1.1644	0.537885	2.16477	0.030405	0.547637
POLD1	Ovarian Cancer	factor(aya_status)1	2.19759	1.23732	1.7761	0.075717	0.773688
RPS6KA4	Bladder Cancer	factor(sample_subtypes)others	2.41795	1.117	2.16468	0.0304119	0.547637
SMO	Colorectal Cancer	factor(sample_subtypes)Rectal Adenocarcinoma	-0.621076	0.287013	-2.16393	0.0304698	0.548014
MEN1	Breast Cancer	factor(sample_status)1	0.587331	0.271442	2.16375	0.0304839	0.548014
RAD21	Colorectal Cancer	factor(sample_subtypes)Rectal Adenocarcinoma	-1.1544	0.533635	-2.16327	0.0305206	0.548014
FAT1	Breast Cancer	factor(sample_all$sex)Male	1.34999	0.624056	2.16325	0.0305221	0.548014
MAP2K1	Endometrial Cancer	factor(sample_subtypes)Uterine Carcinosarcoma/Uterine Malignant Mixed Mullerian Tumor	-3.19785	1.47888	-2.16234	0.0305918	0.548492
NTRK2	Endometrial Cancer	factor(sample_status)1	-1.18269	0.547027	-2.16203	0.0306158	0.548492
STAT5B	Colorectal Cancer	factor(aya_status)1	0.577809	0.325428	1.77554	0.0758092	0.774133
MAP2K2	Colorectal Cancer	factor(sample_status)1	-1.05738	0.489048	-2.16212	0.0306087	0.548492
TP53	Melanoma	factor(sample_all$sex)Male	0.343721	0.159035	2.1613	0.0306726	0.549108
TP53	Non-Small Cell Lung Cancer	factor(sample_subtypes)others	-0.956974	0.443246	-2.15901	0.030849	0.550661
EPHA7	Colorectal Cancer	factor(sample_subtypes)Rectal Adenocarcinoma	-0.557073	0.257963	-2.15951	0.0308106	0.550661
AKT1	Ovarian Cancer	factor(aya_status)1	2.2843	1.28856	1.77276	0.0762689	0.775449
SLX4	Endometrial Cancer	factor(sample_subtypes)Uterine Serous Carcinoma/Uterine Papillary Serous Carcinoma	-3.14301	1.45569	-2.15912	0.0308405	0.550661
INSR	Colorectal Cancer	factor(sample_subtypes)Rectal Adenocarcinoma	-0.787826	0.364955	-2.15869	0.0308739	0.550705
SPRED1	Endometrial Cancer	factor(sample_subtypes)Uterine Serous Carcinoma/Uterine Papillary Serous Carcinoma	-3.16453	1.4674	-2.15656	0.0310401	0.553267
CREBBP	Endometrial Cancer	factor(sample_status)1	-0.606076	0.281083	-2.15622	0.0310665	0.553336
NF1	Non-Small Cell Lung Cancer	factor(aya_status)1	-1.27167	0.717815	-1.77158	0.0764642	0.775449
IDH2	Colorectal Cancer	factor(sample_subtypes)Rectal Adenocarcinoma	-1.31366	0.609475	-2.1554	0.0311304	0.554071
IGF1R	Endometrial Cancer	factor(sample_subtypes)Uterine Endometrioid Carcinoma	-1.78934	0.830597	-2.15428	0.0312183	0.554831
RARA	Hepatobiliary Cancer	factor(sample_status)1	2.42933	1.12755	2.15451	0.0312001	0.554831
CDKN2A	Melanoma	factor(sample_status)1	0.487262	0.226335	2.15283	0.0313319	0.555
IKZF1	Ovarian Cancer	factor(aya_status)1	2.2843	1.28856	1.77276	0.0762689	0.775449
GNA11	Colorectal Cancer	factor(sample_status)1	-1.05688	0.49128	-2.15128	0.0314539	0.555
BRCA1	Colorectal Cancer	factor(sample_subtypes)Rectal Adenocarcinoma	-0.601244	0.279458	-2.15146	0.0314396	0.555
NF1	Melanoma	factor(sample_all$sex)Male	0.322819	0.149971	2.15254	0.0313546	0.555
ATR	Melanoma	factor(sample_all$sex)Male	0.588271	0.273173	2.15347	0.0312817	0.555
RICTOR	Melanoma	factor(sample_all$sex)Male	0.731812	0.339925	2.15287	0.0313293	0.555
RAD50	Ovarian Cancer	factor(aya_status)1	2.2843	1.28856	1.77276	0.0762689	0.775449
TGFBR2	Non-Small Cell Lung Cancer	factor(sample_status)1	0.482188	0.224113	2.15154	0.0314334	0.555
MGA	Melanoma	factor(sample_all$sex)Male	0.514926	0.239232	2.15241	0.031365	0.555
NPM1	Non-Small Cell Lung Cancer	factor(sample_status)1	0.885559	0.411743	2.15076	0.0314952	0.555154
RBM10	Bladder Cancer	factor(sample_status)1	-0.600128	0.279163	-2.14974	0.0315757	0.555154
PPARG	Endometrial Cancer	factor(sample_subtypes)Uterine Carcinosarcoma/Uterine Malignant Mixed Mullerian Tumor	-3.22042	1.49772	-2.15022	0.0315378	0.555154
ASXL2	Renal Cell Carcinoma	factor(sample_subtypes)Renal Clear Cell Carcinoma	-2.60922	1.21366	-2.14988	0.0315649	0.555154
KMT2D	Soft Tissue Sarcoma	factor(sample_subtypes)others	2.06335	0.960268	2.14872	0.0316564	0.555491
SDHA	Non-Small Cell Lung Cancer	factor(aya_status)1	1.0738	0.606689	1.76994	0.0767372	0.775449
KMT2B	Non-Small Cell Lung Cancer	factor(sample_all$sex)Male	0.392302	0.182606	2.14836	0.0316855	0.555491
ZFHX3	Melanoma	factor(sample_subtypes)Melanoma of Unknown Primary	2.24061	1.04287	2.1485	0.0316744	0.555491
PIK3R3	Bladder Cancer	factor(sample_all$sex)Male	-1.28367	0.597342	-2.14896	0.0316373	0.555491
MST1R	Endometrial Cancer	factor(sample_subtypes)Uterine Endometrioid Carcinoma	-1.79994	0.838016	-2.14785	0.0317253	0.555794
FLT1	Colorectal Cancer	factor(sample_subtypes)Rectal Adenocarcinoma	-0.616729	0.28726	-2.14694	0.0317984	0.556675
PRDM14	Non-Small Cell Lung Cancer	factor(sample_subtypes)Lung Adenocarcinoma	-1.32033	0.615234	-2.14607	0.0318675	0.557488
APC	Non-Small Cell Lung Cancer	factor(sample_status)1	0.285823	0.133211	2.14564	0.0319015	0.557685
PTEN	Melanoma	factor(sample_status)1	0.588565	0.274437	2.14463	0.0319828	0.558708
RIT1	Colorectal Cancer	factor(aya_status)1	0.825015	0.465737	1.77142	0.076491	0.775449
KMT2B	Non-Small Cell Lung Cancer	factor(sample_subtypes)Lung Adenocarcinoma	-1.0331	0.482019	-2.14327	0.0320915	0.559413
BCL2L11	Non-Small Cell Lung Cancer	factor(sample_subtypes)Lung Adenocarcinoma	-1.64299	0.766475	-2.14357	0.0320677	0.559413
BRCA2	Melanoma	factor(sample_subtypes)Cutaneous Melanoma	1.56882	0.73239	2.14206	0.0321888	0.560187
CDKN1A	Bladder Cancer	factor(sample_all$sex)Male	0.447394	0.20888	2.14186	0.0322044	0.560187
CTNNB1	Bladder Cancer	factor(sample_status)1	-1.12976	0.527676	-2.14102	0.0322727	0.56058
PAK7	Endometrial Cancer	factor(sample_subtypes)Uterine Carcinosarcoma/Uterine Malignant Mixed Mullerian Tumor	-3.13298	1.4632	-2.14118	0.0322593	0.56058
ZFHX3	Head and Neck Cancer	factor(sample_subtypes)Oral Cavity Squamous Cell Carcinoma	-2.24679	1.0497	-2.14042	0.0323207	0.560621
PIK3CD	Ovarian Cancer	factor(aya_status)1	2.2843	1.28856	1.77276	0.0762689	0.775449
DROSHA	Endometrial Cancer	factor(sample_subtypes)Uterine Serous Carcinoma/Uterine Papillary Serous Carcinoma	-2.74373	1.28179	-2.14055	0.0323103	0.560621
SOX17	Melanoma	factor(sample_all$sex)Male	0.814779	0.380733	2.14003	0.0323527	0.56078
IKZF1	Colorectal Cancer	factor(sample_subtypes)others	1.71696	0.802427	2.13971	0.0323781	0.560824
BRCA2	Melanoma	factor(sample_subtypes)Melanoma of Unknown Primary	1.64974	0.771372	2.13871	0.0324589	0.561432
IGF1R	Breast Cancer	factor(sample_status)1	0.725607	0.339244	2.13889	0.0324444	0.561432
STK11	Non-Small Cell Lung Cancer	factor(sample_subtypes)Lung Neuroendocrine Tumor	-1.65065	0.771939	-2.13831	0.0324914	0.561598
MSH6	Ovarian Cancer	factor(aya_status)1	2.28149	1.29185	1.76606	0.0773858	0.776971
IDH1	Non-Small Cell Lung Cancer	factor(sample_subtypes)Lung Adenocarcinoma	-1.31326	0.615202	-2.13468	0.0327869	0.562014
KRAS	Non-Small Cell Lung Cancer	factor(sample_all$sex)Male	-0.136382	0.0638416	-2.13626	0.0326585	0.562014
ATM	Endometrial Cancer	factor(sample_status)1	-0.513827	0.240472	-2.13675	0.0326187	0.562014
DNMT3A	Non-Small Cell Lung Cancer	factor(sample_subtypes)Lung Adenocarcinoma	-1.01146	0.47394	-2.13416	0.0328298	0.562014
PARP1	Ovarian Cancer	factor(aya_status)1	2.28149	1.29185	1.76606	0.0773858	0.776971
CCND2	Melanoma	factor(sample_all$sex)Male	1.60531	0.753178	2.13138	0.0330575	0.562014
FAM46C	Melanoma	factor(sample_all$sex)Male	1.05612	0.495456	2.13162	0.0330382	0.562014
KMT2D	Pancreatic Cancer	factor(sample_status)1	0.478563	0.224251	2.13406	0.0328382	0.562014
TSC1	Renal Cell Carcinoma	factor(sample_all$sex)Male	-1.06642	0.500418	-2.13106	0.0330838	0.562014
FOXL2	Non-Small Cell Lung Cancer	factor(sample_all$sex)Male	0.622377	0.291309	2.13648	0.0326402	0.562014
RNF43	Hepatobiliary Cancer	factor(sample_subtypes)Hepatocellular Carcinoma	-2.34397	1.09741	-2.13592	0.0326861	0.562014
ARID1B	Esophagogastric Cancer	factor(sample_subtypes)Stomach Adenocarcinoma	-1.34351	0.629255	-2.13508	0.0327542	0.562014
EIF4A2	Breast Cancer	factor(aya_status)1	1.01327	0.57581	1.75973	0.0784535	0.780845
FGF19	Endometrial Cancer	factor(sample_subtypes)Uterine Endometrioid Carcinoma	-2.53936	1.1887	-2.13625	0.0326592	0.562014
PIK3CG	Endometrial Cancer	factor(sample_subtypes)Uterine Carcinosarcoma/Uterine Malignant Mixed Mullerian Tumor	-3.10885	1.45726	-2.13335	0.0328961	0.562014
AXIN1	Colorectal Cancer	factor(sample_subtypes)Colorectal Adenocarcinoma	-0.850757	0.399039	-2.13201	0.0330058	0.562014
PRKCI	Endometrial Cancer	factor(sample_subtypes)Uterine Carcinosarcoma/Uterine Malignant Mixed Mullerian Tumor	-3.19647	1.49791	-2.13394	0.0328473	0.562014
SPEN	Ovarian Cancer	factor(aya_status)1	1.54794	0.883242	1.75256	0.0796769	0.787592
PIK3C3	Endometrial Cancer	factor(sample_subtypes)Uterine Carcinosarcoma/Uterine Malignant Mixed Mullerian Tumor	-3.11664	1.46137	-2.13268	0.0329506	0.562014
WHSC1	Melanoma	factor(sample_all$sex)Male	0.918271	0.430503	2.13302	0.032923	0.562014
ERCC3	Colorectal Cancer	factor(sample_status)1	-0.697997	0.327514	-2.1312	0.0330728	0.562014
KMT2C	Melanoma	factor(sample_all$sex)Male	0.410548	0.192654	2.13101	0.033088	0.562014
ATR	Hepatobiliary Cancer	factor(aya_status)1	1.46597	0.839264	1.74673	0.0806837	0.79054
PPARG	Melanoma	factor(sample_all$sex)Male	0.785325	0.368522	2.13102	0.0330879	0.562014
BIRC3	Endometrial Cancer	factor(sample_subtypes)Uterine Endometrioid Carcinoma	-2.55002	1.19543	-2.13314	0.0329133	0.562014
TET2	Melanoma	factor(sample_subtypes)Melanoma of Unknown Primary	1.37754	0.64663	2.13034	0.0331434	0.562567
AXL	Melanoma	factor(sample_subtypes)others	2.52722	1.18676	2.12951	0.0332125	0.562961
IDH1	Colorectal Cancer	factor(aya_status)1	0.694897	0.398919	1.74195	0.0815174	0.79422
NEGR1	Endometrial Cancer	factor(sample_subtypes)Uterine Carcinosarcoma/Uterine Malignant Mixed Mullerian Tumor	-2.80681	1.31793	-2.1297	0.0331964	0.562961
PIK3CA	Colorectal Cancer	factor(sample_all$sex)Male	-0.176432	0.0829726	-2.12639	0.033471	0.566055
JAK1	Colorectal Cancer	factor(sample_subtypes)Rectal Adenocarcinoma	-0.613821	0.288868	-2.12492	0.0335932	0.566055
RAD51	Colorectal Cancer	factor(sample_status)1	-2.19463	1.0322	-2.12617	0.0334887	0.566055
RAD51D	Non-Small Cell Lung Cancer	factor(sample_subtypes)Lung Adenocarcinoma	-1.62031	0.762387	-2.12531	0.0335605	0.566055
CD79A	Colorectal Cancer	factor(sample_all$sex)Male	-0.702732	0.330396	-2.12694	0.0334252	0.566055
FGFR3	Ovarian Cancer	factor(aya_status)1	2.21352	1.27184	1.74042	0.0817861	0.794706
CD79A	Melanoma	factor(sample_all$sex)Male	1.60619	0.755518	2.12595	0.0335078	0.566055
YAP1	Breast Cancer	factor(sample_all$sex)Male	2.30433	1.08433	2.12512	0.0335765	0.566055
EPAS1	Endometrial Cancer	factor(sample_subtypes)Uterine Serous Carcinoma/Uterine Papillary Serous Carcinoma	-2.74701	1.29278	-2.12489	0.0335958	0.566055
ALK	Endometrial Cancer	factor(sample_subtypes)Uterine Serous Carcinoma/Uterine Papillary Serous Carcinoma	-2.69618	1.27095	-2.12138	0.0338895	0.566644
NF1	Soft Tissue Sarcoma	factor(sample_subtypes)Myxofibrosarcoma	1.98361	0.934694	2.1222	0.0338208	0.566644
RBM10	Ovarian Cancer	factor(aya_status)1	2.21352	1.27184	1.74042	0.0817861	0.794706
NTRK2	Colorectal Cancer	factor(sample_subtypes)Rectal Adenocarcinoma	-0.77355	0.364553	-2.12191	0.0338451	0.566644
EPHB1	Melanoma	factor(sample_status)1	-0.587121	0.276766	-2.12136	0.0338915	0.566644
PAK7	Breast Cancer	factor(sample_status)1	1.14664	0.540386	2.12188	0.0338474	0.566644
SMAD3	Bladder Cancer	factor(sample_subtypes)Upper Tract Urothelial Carcinoma	1.03608	0.48777	2.12411	0.0336608	0.566644
HIST1H3C	Bladder Cancer	factor(sample_all$sex)Male	-1.29818	0.611677	-2.12234	0.0338096	0.566644
PGR	Melanoma	factor(sample_subtypes)Melanoma of Unknown Primary	2.26037	1.06467	2.12307	0.0337477	0.566644
ERF	Colorectal Cancer	factor(sample_status)1	-0.743264	0.350137	-2.12278	0.0337724	0.566644
GREM1	Colorectal Cancer	factor(aya_status)1	1.18595	0.681216	1.74093	0.0816954	0.794706
AXIN1	Hepatobiliary Cancer	factor(sample_subtypes)Hepatocellular Carcinoma	2.21097	1.04274	2.12034	0.0339776	0.567697
ARID5B	Bladder Cancer	factor(sample_status)1	-2.15952	1.01901	-2.11924	0.0340702	0.568617
DNAJB1	Non-Small Cell Lung Cancer	factor(sample_subtypes)Lung Squamous Cell Carcinoma	-1.7831	0.841427	-2.11914	0.034079	0.568617
MGA	Head and Neck Cancer	factor(sample_status)1	-1.26971	0.599315	-2.1186	0.0341239	0.568979
RB1	Gastrointestinal Stromal Tumor	factor(sample_status)1	0.980819	0.463154	2.11769	0.0342009	0.56949
ALOX12B	Non-Small Cell Lung Cancer	factor(sample_status)1	-1.0502	0.495878	-2.11786	0.0341869	0.56949
ATRX	Esophagogastric Cancer	factor(sample_all$sex)Male	-1.24874	0.589817	-2.11716	0.0342459	0.5695
TSC1	Breast Cancer	factor(sample_status)1	0.895576	0.423012	2.11714	0.034248	0.5695
RB1	Ovarian Cancer	factor(aya_status)1	1.52542	0.876821	1.73972	0.0819084	0.795237
KDM6A	Colorectal Cancer	factor(sample_subtypes)Colorectal Adenocarcinoma	-0.907103	0.428848	-2.11521	0.0344123	0.569916
MAP3K1	Bladder Cancer	factor(sample_subtypes)others	2.36087	1.11608	2.11532	0.0344028	0.569916
NBN	Non-Small Cell Lung Cancer	factor(sample_subtypes)Lung Adenocarcinoma	-1.12099	0.529758	-2.11605	0.034341	0.569916
EPHA5	Head and Neck Cancer	factor(sample_subtypes)Oral Cavity Squamous Cell Carcinoma	-2.29385	1.08423	-2.11565	0.0343748	0.569916
SETD2	Renal Cell Carcinoma	factor(sample_all$sex)Male	0.581451	0.274936	2.11486	0.0344417	0.570018
CEBPA	Non-Small Cell Lung Cancer	factor(sample_subtypes)Lung Adenocarcinoma	-1.59912	0.756801	-2.11299	0.0346012	0.570734
PBRM1	Melanoma	factor(sample_all$sex)Male	0.609331	0.288338	2.11325	0.0345792	0.570734
ATM	Melanoma	factor(aya_status)1	-1.04174	0.599302	-1.73826	0.0821648	0.796172
FOXP1	Ovarian Cancer	factor(sample_subtypes)High-Grade Serous Ovarian Cancer	-1.91252	0.905108	-2.11303	0.0345978	0.570734
PTPRD	Hepatobiliary Cancer	factor(sample_subtypes)Intrahepatic Cholangiocarcinoma	-1.45041	0.686184	-2.11374	0.0345374	0.570734
SMAD4	Hepatobiliary Cancer	factor(sample_subtypes)Gallbladder Cancer	0.768154	0.36405	2.11002	0.0348565	0.571439
ATRX	Melanoma	factor(sample_subtypes)Mucosal Melanoma of the Vulva/Vagina	1.13804	0.539303	2.11021	0.0348404	0.571439
NF2	Melanoma	factor(sample_status)1	1.58609	0.751764	2.10982	0.0348735	0.571439
TSC2	Bladder Cancer	factor(sample_subtypes)Upper Tract Urothelial Carcinoma	0.691128	0.32759	2.10973	0.0348814	0.571439
MDM4	Bladder Cancer	factor(aya_status)1	1.8786	1.08186	1.73646	0.0824833	0.797663
TSHR	Colorectal Cancer	factor(sample_status)1	-0.621265	0.294506	-2.10952	0.0349001	0.571439
BRD4	Breast Cancer	factor(sample_subtypes)Breast Invasive Lobular Carcinoma	-2.67242	1.26613	-2.11071	0.0347976	0.571439
AMER1	Colorectal Cancer	factor(sample_all$sex)Male	-0.266192	0.126065	-2.11154	0.0347257	0.571439
INSR	Melanoma	factor(sample_subtypes)Melanoma of Unknown Primary	1.65262	0.782769	2.11125	0.0347509	0.571439
NUP93	Colorectal Cancer	factor(aya_status)1	0.616251	0.355995	1.73107	0.0834396	0.802171
ELF3	Breast Cancer	factor(sample_subtypes)Breast Invasive Lobular Carcinoma	-3.24881	1.5397	-2.11003	0.034856	0.571439
AGO2	Colorectal Cancer	factor(sample_status)1	-0.708052	0.335643	-2.10954	0.034898	0.571439
KIT	Colorectal Cancer	factor(sample_status)1	-0.586697	0.278401	-2.10738	0.0350845	0.571987
PIK3CA	Head and Neck Cancer	factor(sample_status)1	0.536251	0.25448	2.10724	0.0350967	0.571987
ANKRD11	Melanoma	factor(aya_status)1	-1.0355	0.602219	-1.71947	0.0855297	0.812399
MED12	Hepatobiliary Cancer	factor(sample_subtypes)others	3.14649	1.49217	2.10866	0.0349741	0.571987
EPHA3	Melanoma	factor(sample_subtypes)others	2.50011	1.18643	2.10726	0.0350955	0.571987
INHBA	Esophagogastric Cancer	factor(sample_subtypes)Stomach Adenocarcinoma	-1.80566	0.856848	-2.10733	0.0350894	0.571987
MGA	Colorectal Cancer	factor(sample_all$sex)Male	0.329422	0.156288	2.10778	0.0350497	0.571987
PTPN11	Non-Small Cell Lung Cancer	factor(sample_subtypes)Lung Adenocarcinoma	-1.29212	0.613399	-2.10649	0.0351616	0.572509
AKT3	Endometrial Cancer	factor(sample_subtypes)Uterine Carcinosarcoma/Uterine Malignant Mixed Mullerian Tumor	-3.07456	1.45967	-2.10633	0.0351753	0.572509
SYK	Endometrial Cancer	factor(sample_subtypes)Uterine Carcinosarcoma/Uterine Malignant Mixed Mullerian Tumor	-3.08101	1.46337	-2.10542	0.0352552	0.573428
HGF	Colorectal Cancer	factor(aya_status)1	0.531473	0.309381	1.71786	0.0858222	0.812976
MDM2	Breast Cancer	factor(sample_subtypes)Breast Invasive Ductal Carcinoma	-2.29532	1.09082	-2.10422	0.0353594	0.573603
STAT3	Colorectal Cancer	factor(sample_subtypes)Rectal Adenocarcinoma	-0.928971	0.441459	-2.10432	0.0353507	0.573603
PDGFRB	Melanoma	factor(aya_status)1	-1.2435	0.728029	-1.70803	0.0876307	0.817486
PLCG2	Ovarian Cancer	factor(sample_status)1	-2.27649	1.08161	-2.10473	0.0353148	0.573603
NRAS	Hepatobiliary Cancer	factor(sample_subtypes)others	3.13061	1.48879	2.10279	0.0354842	0.573812
STK11	Endometrial Cancer	factor(sample_subtypes)Uterine Endometrioid Carcinoma	-1.74277	0.828788	-2.10279	0.035484	0.573812
IKZF1	Endometrial Cancer	factor(sample_subtypes)Uterine Serous Carcinoma/Uterine Papillary Serous Carcinoma	-2.68686	1.27772	-2.10287	0.0354776	0.573812
NTRK2	Non-Small Cell Lung Cancer	factor(sample_subtypes)Lung Squamous Cell Carcinoma	-1.346	0.639872	-2.10354	0.0354184	0.573812
SETD2	Colorectal Cancer	factor(sample_subtypes)Colorectal Adenocarcinoma	-0.606994	0.288669	-2.10273	0.0354892	0.573812
PMAIP1	Non-Small Cell Lung Cancer	factor(sample_subtypes)Lung Adenocarcinoma	-2.31725	1.10247	-2.10186	0.0355652	0.574662
RFWD2	Ovarian Cancer	factor(aya_status)1	2.15169	1.26027	1.70733	0.0877607	0.81777
TCF7L2	Breast Cancer	factor(sample_status)1	1.07168	0.510023	2.10123	0.0356207	0.57518
APC	Thyroid Cancer	factor(sample_subtypes)Papillary Thyroid Cancer	-2.64541	1.26028	-2.09907	0.0358109	0.57546
CBL	Endometrial Cancer	factor(sample_subtypes)Uterine Endometrioid Carcinoma	-1.73613	0.827063	-2.09914	0.0358042	0.57546
KMT2A	Endometrial Cancer	factor(sample_subtypes)Uterine Serous Carcinoma/Uterine Papillary Serous Carcinoma	-2.66073	1.26784	-2.09864	0.035849	0.57546
PPM1D	Colorectal Cancer	factor(aya_status)1	0.531338	0.312045	1.70276	0.0886128	0.821342
CREBBP	Endometrial Cancer	factor(sample_subtypes)Uterine Carcinosarcoma/Uterine Malignant Mixed Mullerian Tumor	-1.82242	0.868049	-2.09944	0.0357779	0.57546
SH2B3	Endometrial Cancer	factor(sample_subtypes)Uterine Serous Carcinoma/Uterine Papillary Serous Carcinoma	-2.6896	1.28056	-2.10033	0.0357002	0.57546
EPHA7	Head and Neck Cancer	factor(sample_subtypes)Oral Cavity Squamous Cell Carcinoma	-2.25786	1.07583	-2.09872	0.0358416	0.57546
SUZ12	Non-Small Cell Lung Cancer	factor(sample_status)1	0.779527	0.371248	2.09975	0.0357512	0.57546
EZH1	Endometrial Cancer	factor(aya_status)1	1.33846	0.787059	1.70058	0.0890223	0.823271
ANKRD11	Melanoma	factor(sample_subtypes)Cutaneous Melanoma	2.14486	1.02105	2.10065	0.0356716	0.57546
ATM	Non-Small Cell Lung Cancer	factor(sample_subtypes)Lung Squamous Cell Carcinoma	-0.858214	0.409035	-2.09814	0.0358924	0.575687
ARID1A	Ovarian Cancer	factor(sample_subtypes)others	-2.34749	1.11895	-2.09794	0.0359101	0.575687
IKZF1	Melanoma	factor(aya_status)1	-0.805761	0.47411	-1.69952	0.0892208	0.824487
BAP1	Breast Cancer	factor(sample_subtypes)Breast Invasive Lobular Carcinoma	-2.64529	1.2611	-2.09761	0.0359399	0.575789
PTCH1	Ovarian Cancer	factor(aya_status)1	2.11094	1.24476	1.69586	0.0899126	0.828695
FGF19	Endometrial Cancer	factor(sample_subtypes)Uterine Carcinosarcoma/Uterine Malignant Mixed Mullerian Tumor	-3.13945	1.49707	-2.09706	0.0359881	0.576184
KDM6A	Endometrial Cancer	factor(sample_subtypes)Uterine Serous Carcinoma/Uterine Papillary Serous Carcinoma	-2.66207	1.27074	-2.0949	0.0361798	0.577766
NOTCH2	Esophagogastric Cancer	factor(sample_subtypes)Esophagogastric Adenocarcinoma	2.45421	1.17167	2.09462	0.0362045	0.577766
TRAF7	Melanoma	factor(sample_all$sex)Male	0.90353	0.431215	2.09531	0.0361433	0.577766
AXIN2	Non-Small Cell Lung Cancer	factor(aya_status)1	1.0324	0.608885	1.69555	0.0899713	0.828925
PIK3CD	Endometrial Cancer	factor(sample_subtypes)Uterine Carcinosarcoma/Uterine Malignant Mixed Mullerian Tumor	-3.05793	1.45935	-2.09541	0.0361345	0.577766
MALT1	Melanoma	factor(sample_all$sex)Male	1.14252	0.545433	2.0947	0.0361974	0.577766
EGFR	Endometrial Cancer	factor(sample_subtypes)Uterine Carcinosarcoma/Uterine Malignant Mixed Mullerian Tumor	-3.04969	1.45643	-2.09394	0.0362649	0.57825
MED12	Pancreatic Cancer	factor(sample_all$sex)Male	-0.9046	0.432078	-2.0936	0.0362953	0.57825
PTPRD	Non-Small Cell Lung Cancer	factor(sample_subtypes)Lung Squamous Cell Carcinoma	-0.712937	0.340549	-2.09349	0.0363055	0.57825
ALK	Hepatobiliary Cancer	factor(sample_status)1	1.21113	0.578689	2.09289	0.0363586	0.578297
KRAS	Hepatobiliary Cancer	factor(aya_status)1	-1.28407	0.758103	-1.69379	0.0903046	0.830212
KMT2A	Hepatobiliary Cancer	factor(sample_subtypes)Intrahepatic Cholangiocarcinoma	-1.43654	0.686313	-2.09313	0.0363377	0.578297
RAD50	Endometrial Cancer	factor(sample_status)1	-1.03041	0.492391	-2.09266	0.0363792	0.578297
AKT2	Breast Cancer	factor(sample_status)1	1.67007	0.798689	2.09102	0.0365265	0.580264
MSH6	Breast Cancer	factor(sample_subtypes)Breast Invasive Lobular Carcinoma	-2.63994	1.26305	-2.09013	0.0366059	0.580398
CBFB	Breast Cancer	factor(sample_subtypes)Invasive Breast Carcinoma	-1.64509	0.78694	-2.09049	0.0365742	0.580398
KRAS	Ovarian Cancer	factor(aya_status)1	-0.975712	0.57666	-1.692	0.0906452	0.831193
HIST1H3G	Melanoma	factor(sample_status)1	-1.2515	0.598697	-2.09037	0.0365842	0.580398
SPEN	Hepatobiliary Cancer	factor(sample_subtypes)others	3.11649	1.49131	2.08976	0.036639	0.580547
IDH1	Hepatobiliary Cancer	factor(sample_all$sex)Male	-0.467821	0.223909	-2.08933	0.0366779	0.58072
MLH1	Endometrial Cancer	factor(sample_subtypes)Uterine Carcinosarcoma/Uterine Malignant Mixed Mullerian Tumor	-3.04535	1.45853	-2.08796	0.0368015	0.58072
CEBPA	Colorectal Cancer	factor(sample_status)1	-2.15352	1.03117	-2.08842	0.03676	0.58072
EPHA3	Melanoma	factor(sample_subtypes)Melanoma of Unknown Primary	2.18516	1.04597	2.08911	0.0366974	0.58072
NCOR1	Non-Small Cell Lung Cancer	factor(sample_subtypes)Lung Squamous Cell Carcinoma	-0.91363	0.437603	-2.0878	0.0368155	0.58072
MET	Melanoma	factor(aya_status)1	-0.888613	0.5257	-1.69034	0.0909621	0.832986
LATS2	Endometrial Cancer	factor(sample_subtypes)Uterine Serous Carcinoma/Uterine Papillary Serous Carcinoma	-2.65366	1.2707	-2.08835	0.0367665	0.58072
TERT	Endometrial Cancer	factor(sample_subtypes)Uterine Carcinosarcoma/Uterine Malignant Mixed Mullerian Tumor	-3.03871	1.45578	-2.08734	0.0368572	0.581004
CD79A	Non-Small Cell Lung Cancer	factor(sample_subtypes)Lung Adenocarcinoma	-2.32534	1.11478	-2.08592	0.0369861	0.582662
HRAS	Thyroid Cancer	factor(sample_subtypes)Papillary Thyroid Cancer	-2.55701	1.22628	-2.08517	0.0370535	0.582975
KEAP1	Head and Neck Cancer	factor(sample_subtypes)others	1.99477	0.956595	2.08528	0.0370439	0.582975
PIK3C2G	Melanoma	factor(sample_subtypes)others	2.47444	1.18686	2.08486	0.0370825	0.583057
CREBBP	Melanoma	factor(sample_subtypes)Cutaneous Melanoma	2.1206	1.01752	2.08409	0.0371524	0.583783
JAK2	Colorectal Cancer	factor(sample_subtypes)Rectal Adenocarcinoma	-0.999506	0.479955	-2.0825	0.0372969	0.585428
PTPN11	Ovarian Cancer	factor(aya_status)1	2.09863	1.24193	1.68982	0.0910632	0.832986
SMO	Colorectal Cancer	factor(sample_subtypes)Colorectal Adenocarcinoma	-0.831101	0.399155	-2.08215	0.0373286	0.585428
MUTYH	Colorectal Cancer	factor(sample_status)1	-0.777286	0.373264	-2.0824	0.0373058	0.585428
PARP1	Endometrial Cancer	factor(sample_subtypes)Uterine Serous Carcinoma/Uterine Papillary Serous Carcinoma	-2.65529	1.27574	-2.08137	0.0374	0.585798
TP53	Pancreatic Cancer	factor(sample_status)1	0.221607	0.106507	2.08067	0.0374637	0.586267
PDGFRA	Gastrointestinal Stromal Tumor	factor(sample_status)1	-0.782406	0.376062	-2.08052	0.0374777	0.586267
ASXL2	Non-Small Cell Lung Cancer	factor(sample_all$sex)Male	0.441176	0.212151	2.07954	0.0375677	0.587301
BRAF	Breast Cancer	factor(sample_subtypes)Breast Invasive Lobular Carcinoma	-2.64203	1.27118	-2.07841	0.0376717	0.587597
KDR	Head and Neck Cancer	factor(aya_status)1	2.08552	1.23492	1.68879	0.0912605	0.832986
MAP3K1	Colorectal Cancer	factor(sample_subtypes)Rectal Adenocarcinoma	-0.548385	0.263863	-2.07829	0.0376825	0.587597
SOCS1	Colorectal Cancer	factor(sample_all$sex)Male	-1.09907	0.528832	-2.0783	0.037682	0.587597
PRDM14	Endometrial Cancer	factor(sample_subtypes)Uterine Carcinosarcoma/Uterine Malignant Mixed Mullerian Tumor	-3.0815	1.48304	-2.07783	0.0377247	0.587883
TP53BP1	Thyroid Cancer	factor(sample_subtypes)Papillary Thyroid Cancer	-2.89999	1.39629	-2.07693	0.0378082	0.588811
PRKCI	Colorectal Cancer	factor(sample_subtypes)Rectal Adenocarcinoma	-1.11248	0.535757	-2.07646	0.0378514	0.589109
MSH3	Colorectal Cancer	factor(sample_subtypes)Colorectal Adenocarcinoma	-0.496335	0.239068	-2.07613	0.0378822	0.589132
MITF	Endometrial Cancer	factor(aya_status)1	1.08023	0.63942	1.68939	0.0911447	0.832986
DNMT3B	Non-Small Cell Lung Cancer	factor(sample_subtypes)Lung Squamous Cell Carcinoma	-1.32948	0.640426	-2.07592	0.0379009	0.589132
EPHA3	Pancreatic Cancer	factor(sample_status)1	1.12646	0.542701	2.07565	0.0379259	0.589148
CARM1	Endometrial Cancer	factor(sample_subtypes)Uterine Carcinosarcoma/Uterine Malignant Mixed Mullerian Tumor	-2.80506	1.35185	-2.07498	0.0379883	0.589313
ERF	Breast Cancer	factor(sample_subtypes)Breast Invasive Lobular Carcinoma	-2.88183	1.38899	-2.07476	0.0380086	0.589313
KRAS	Germ Cell Tumor	factor(aya_status)1	-0.648762	0.384966	-1.68525	0.0919409	0.834851
TP53BP1	Endometrial Cancer	factor(sample_subtypes)Uterine Serous Carcinoma/Uterine Papillary Serous Carcinoma	-2.65157	1.27845	-2.07405	0.0380742	0.589958
ATM	Pancreatic Cancer	factor(sample_subtypes)Pancreatic Adenocarcinoma	-2.42999	1.17179	-2.07375	0.0381028	0.590029
NOTCH2	Hepatobiliary Cancer	factor(sample_status)1	1.51855	0.73241	2.07336	0.0381392	0.59022
NSD1	Soft Tissue Sarcoma	factor(sample_status)1	2.262	1.0916	2.07219	0.038248	0.590635
TMPRSS2	Non-Small Cell Lung Cancer	factor(aya_status)1	1.24656	0.739689	1.68525	0.0919411	0.834851
FOXO1	Melanoma	factor(sample_all$sex)Male	1.02921	0.496839	2.07152	0.0383104	0.590635
PTPRS	Melanoma	factor(sample_subtypes)Melanoma of Unknown Primary	1.6044	0.77445	2.07166	0.0382971	0.590635
TAP1	Non-Small Cell Lung Cancer	factor(sample_subtypes)Lung Adenocarcinoma	-1.57463	0.759845	-2.0723	0.0382371	0.590635
TP53	Germ Cell Tumor	factor(sample_status)1	1.68919	0.816142	2.06972	0.0384785	0.591
ESR1	Colorectal Cancer	factor(sample_status)1	-0.491015	0.237267	-2.06946	0.0385027	0.591
IKZF1	Melanoma	factor(sample_subtypes)Melanoma of Unknown Primary	2.16374	1.04479	2.07099	0.03836	0.591
NUP93	Melanoma	factor(sample_status)1	-0.994531	0.480394	-2.07024	0.0384298	0.591
NSD1	Ovarian Cancer	factor(aya_status)1	1.51196	0.898317	1.6831	0.092355	0.836443
ARID5B	Colorectal Cancer	factor(sample_all$sex)Male	0.485241	0.234455	2.06965	0.0384848	0.591
LYN	Breast Cancer	factor(sample_status)1	1.6082	0.776881	2.07007	0.038446	0.591
FAT1	Non-Small Cell Lung Cancer	factor(aya_status)1	-1.20705	0.718192	-1.68068	0.0928255	0.837612
XIAP	Bladder Cancer	factor(sample_all$sex)Male	-1.1233	0.542569	-2.07033	0.0384211	0.591
BRCA2	Endometrial Cancer	factor(sample_status)1	-0.581415	0.28104	-2.06879	0.0385653	0.591243
KEAP1	Melanoma	factor(sample_status)1	-1.27051	0.614132	-2.06878	0.0385666	0.591243
TAP1	Endometrial Cancer	factor(sample_subtypes)Uterine Serous Carcinoma/Uterine Papillary Serous Carcinoma	-2.69312	1.30206	-2.06835	0.0386069	0.59149
INHBA	Non-Small Cell Lung Cancer	factor(sample_subtypes)Lung Adenocarcinoma	-0.981405	0.474553	-2.06806	0.0386344	0.591542
PLCG2	Endometrial Cancer	factor(sample_subtypes)Uterine Carcinosarcoma/Uterine Malignant Mixed Mullerian Tumor	-2.67021	1.29163	-2.06732	0.0387043	0.591874
ATM	Melanoma	factor(sample_all$sex)Male	0.513114	0.248358	2.06602	0.0388263	0.593001
HIST1H3F	Bladder Cancer	factor(aya_status)1	1.82012	1.08507	1.67742	0.0934613	0.839528
SOX2	Colorectal Cancer	factor(sample_subtypes)Rectal Adenocarcinoma	-0.995376	0.481747	-2.06618	0.0388114	0.593001
REL	Breast Cancer	factor(sample_status)1	1.22276	0.59209	2.06517	0.0389074	0.593614
STAG2	Colorectal Cancer	factor(sample_status)1	-0.629695	0.305082	-2.06402	0.0390162	0.594791
ZFHX3	Endometrial Cancer	factor(sample_subtypes)Uterine Serous Carcinoma/Uterine Papillary Serous Carcinoma	-1.7398	0.843037	-2.06373	0.0390436	0.59484
TBX3	Melanoma	factor(aya_status)1	-1.70403	1.01734	-1.67498	0.0939388	0.841165
RPS6KA4	Non-Small Cell Lung Cancer	factor(sample_subtypes)Lung Squamous Cell Carcinoma	-1.32258	0.640959	-2.06344	0.0390707	0.594884
LATS1	Bladder Cancer	factor(sample_subtypes)Upper Tract Urothelial Carcinoma	-1.24064	0.601406	-2.0629	0.039122	0.595295
CREBBP	Bladder Cancer	factor(sample_subtypes)Upper Tract Urothelial Carcinoma	0.393703	0.191108	2.06011	0.0393878	0.597118
PMS2	Colorectal Cancer	factor(sample_subtypes)Rectal Adenocarcinoma	-0.988676	0.479818	-2.06052	0.0393486	0.597118
ASXL1	Melanoma	factor(aya_status)1	-1.21546	0.72745	-1.67085	0.094752	0.845363
RAD50	Non-Small Cell Lung Cancer	factor(sample_all$sex)Male	0.558234	0.270958	2.06022	0.0393774	0.597118
RHOA	Bladder Cancer	factor(sample_subtypes)Upper Tract Urothelial Carcinoma	-1.24274	0.602965	-2.06105	0.0392987	0.597118
KMT2C	Head and Neck Cancer	factor(sample_all$sex)Male	1.28276	0.622527	2.06058	0.0393433	0.597118
SF3B1	Bladder Cancer	factor(aya_status)1	1.05588	0.636562	1.65872	0.0971725	0.856066
WHSC1L1	Non-Small Cell Lung Cancer	factor(sample_subtypes)Lung Adenocarcinoma	-1.54679	0.750718	-2.06042	0.0393586	0.597118
UPF1	Colorectal Cancer	factor(aya_status)1	0.538677	0.325263	1.65613	0.0976962	0.857296
GATA3	Breast Cancer	factor(sample_all$sex)Male	0.757911	0.368196	2.05845	0.0395474	0.598798
ALK	Endometrial Cancer	factor(sample_subtypes)Uterine Carcinosarcoma/Uterine Malignant Mixed Mullerian Tumor	-2.99243	1.45424	-2.05773	0.0396162	0.599148
RICTOR	Bladder Cancer	factor(sample_all$sex)Male	-0.696885	0.338672	-2.0577	0.0396194	0.599148
ATM	Pancreatic Cancer	factor(sample_status)1	0.53736	0.261309	2.05641	0.0397426	0.600273
KMT2B	Melanoma	factor(aya_status)1	-0.736856	0.445425	-1.65428	0.098071	0.858178
ARID5B	Colorectal Cancer	factor(sample_subtypes)Colorectal Adenocarcinoma	-0.884953	0.430308	-2.05656	0.0397288	0.600273
EPHA5	Soft Tissue Sarcoma	factor(sample_status)1	1.40756	0.684656	2.05586	0.0397957	0.600336
LATS1	Endometrial Cancer	factor(sample_subtypes)Uterine Serous Carcinoma/Uterine Papillary Serous Carcinoma	-2.61216	1.27057	-2.0559	0.0397921	0.600336
SUFU	Melanoma	factor(sample_all$sex)Male	1.12463	0.54716	2.05539	0.0398413	0.600491
H3F3C	Colorectal Cancer	factor(sample_all$sex)Male	0.973809	0.474014	2.05439	0.039938	0.601374
CREBBP	Melanoma	factor(sample_subtypes)Melanoma of Unknown Primary	2.15417	1.04901	2.05353	0.0400214	0.601523
KMT2D	Hepatobiliary Cancer	factor(aya_status)1	0.936778	0.568504	1.64779	0.0993948	0.862557
PREX2	Breast Cancer	factor(sample_status)1	0.775828	0.377727	2.05394	0.0399819	0.601523
UPF1	Non-Small Cell Lung Cancer	factor(sample_all$sex)Male	0.708104	0.344926	2.05292	0.0400805	0.602041
EIF4A2	Ovarian Cancer	factor(sample_status)1	-2.25257	1.09757	-2.05234	0.040137	0.602521
KMT2D	Head and Neck Cancer	factor(sample_subtypes)Oral Cavity Squamous Cell Carcinoma	-0.81587	0.397616	-2.0519	0.040179	0.602784
PALB2	Colorectal Cancer	factor(sample_status)1	-0.570606	0.278344	-2.05	0.0403642	0.604685
PTPRT	Ovarian Cancer	factor(aya_status)1	1.42202	0.863539	1.64674	0.0996115	0.86391
SOX2	Breast Cancer	factor(sample_status)1	1.64597	0.802974	2.04984	0.0403797	0.604685
ALOX12B	Melanoma	factor(sample_status)1	-0.780482	0.380695	-2.05015	0.0403499	0.604685
MYD88	Endometrial Cancer	factor(sample_subtypes)Uterine Serous Carcinoma/Uterine Papillary Serous Carcinoma	-2.63049	1.28397	-2.04871	0.0404904	0.604868
TERT	Melanoma	factor(sample_subtypes)Melanoma of Unknown Primary	2.15235	1.05038	2.04912	0.0404499	0.604868
DROSHA	Endometrial Cancer	factor(sample_subtypes)Uterine Carcinosarcoma/Uterine Malignant Mixed Mullerian Tumor	-3.00185	1.46483	-2.04928	0.0404348	0.604868
ATRX	Soft Tissue Sarcoma	factor(sample_status)1	0.597945	0.292069	2.04727	0.0406314	0.605115
CDK12	Breast Cancer	factor(sample_subtypes)Invasive Breast Carcinoma	-2.12301	1.03718	-2.04691	0.0406674	0.605115
SRC	Bladder Cancer	factor(aya_status)1	1.76786	1.07504	1.64446	0.100081	0.865639
ERCC4	Endometrial Cancer	factor(sample_subtypes)Uterine Serous Carcinoma/Uterine Papillary Serous Carcinoma	-2.48749	1.21567	-2.04618	0.0407386	0.605115
PTPRD	Melanoma	factor(sample_status)1	-0.370161	0.180887	-2.04637	0.0407199	0.605115
KMT2C	Breast Cancer	factor(sample_subtypes)Breast Invasive Ductal Carcinoma	-1.181	0.577216	-2.04603	0.0407535	0.605115
TP63	Colorectal Cancer	factor(sample_subtypes)Colorectal Adenocarcinoma	-1.22531	0.598684	-2.04667	0.0406907	0.605115
EIF4A2	Non-Small Cell Lung Cancer	factor(sample_status)1	0.72497	0.354309	2.04615	0.0407416	0.605115
INPPL1	Pancreatic Cancer	factor(sample_status)1	1.37758	0.67276	2.04765	0.0405944	0.605115
MAPKAP1	Breast Cancer	factor(sample_status)1	2.28719	1.11744	2.04682	0.0406762	0.605115
NOTCH4	Colorectal Cancer	factor(sample_status)1	-0.368861	0.18034	-2.04537	0.0408185	0.605713
GATA2	Ovarian Cancer	factor(aya_status)1	2.00298	1.22056	1.64104	0.10079	0.868845
MAP2K4	Colorectal Cancer	factor(sample_subtypes)Colorectal Adenocarcinoma	-0.955682	0.467422	-2.04458	0.040896	0.606035
NBN	Breast Cancer	factor(sample_subtypes)Breast Invasive Lobular Carcinoma	-2.46995	1.20807	-2.04453	0.0409008	0.606035
ACVR1	Endometrial Cancer	factor(sample_subtypes)Uterine Carcinosarcoma/Uterine Malignant Mixed Mullerian Tumor	-2.98069	1.45798	-2.0444	0.0409143	0.606035
MAX	Endometrial Cancer	factor(sample_subtypes)Uterine Serous Carcinoma/Uterine Papillary Serous Carcinoma	-2.61606	1.28016	-2.04355	0.0409984	0.606915
PRDM1	Non-Small Cell Lung Cancer	factor(sample_subtypes)Lung Adenocarcinoma	-1.2471	0.610422	-2.04302	0.0410509	0.60697
CSF1R	Endometrial Cancer	factor(sample_subtypes)Uterine Serous Carcinoma/Uterine Papillary Serous Carcinoma	-2.60581	1.27562	-2.04277	0.0410753	0.60697
RECQL4	Pancreatic Cancer	factor(sample_all$sex)Male	-1.60144	0.783961	-2.04276	0.0410763	0.60697
BRAF	Non-Small Cell Lung Cancer	factor(aya_status)1	-1.64867	1.00604	-1.63876	0.101263	0.870845
RAD50	Endometrial Cancer	factor(sample_subtypes)Uterine Carcinosarcoma/Uterine Malignant Mixed Mullerian Tumor	-2.63123	1.28871	-2.04175	0.0411768	0.607745
MSH3	Non-Small Cell Lung Cancer	factor(sample_status)1	0.619919	0.303624	2.04173	0.0411783	0.607745
EZH2	Bladder Cancer	factor(sample_all$sex)Male	-0.914514	0.447991	-2.04137	0.0412142	0.60791
MAP2K4	Non-Small Cell Lung Cancer	factor(sample_status)1	0.610422	0.299083	2.04098	0.0412528	0.608113
XPO1	Hepatobiliary Cancer	factor(aya_status)1	1.42565	0.870808	1.63716	0.101596	0.871539
ERCC5	Non-Small Cell Lung Cancer	factor(sample_subtypes)Lung Adenocarcinoma	-1.07923	0.528869	-2.04063	0.0412872	0.608255
FLT3	Endometrial Cancer	factor(sample_subtypes)Uterine Serous Carcinoma/Uterine Papillary Serous Carcinoma	-2.46578	1.20964	-2.03843	0.0415066	0.609962
NOTCH1	Hepatobiliary Cancer	factor(sample_all$sex)Male	1.68482	0.826797	2.03777	0.0415733	0.609962
ERBB3	Esophagogastric Cancer	factor(sample_subtypes)others	1.80661	0.886009	2.03904	0.0414462	0.609962
SPEN	Colorectal Cancer	factor(aya_status)1	0.360864	0.220566	1.63608	0.101823	0.871995
BRD4	Head and Neck Cancer	factor(sample_subtypes)Oral Cavity Squamous Cell Carcinoma	2.19889	1.07848	2.03888	0.0414621	0.609962
TBX3	Non-Small Cell Lung Cancer	factor(sample_subtypes)Lung Squamous Cell Carcinoma	-1.14335	0.560978	-2.03814	0.0415357	0.609962
EPAS1	Endometrial Cancer	factor(sample_subtypes)Uterine Carcinosarcoma/Uterine Malignant Mixed Mullerian Tumor	-3.00517	1.47465	-2.03789	0.0415607	0.609962
NUF2	Melanoma	factor(sample_all$sex)Male	2.13519	1.04783	2.03773	0.041577	0.609962
STAG2	Bladder Cancer	factor(aya_status)1	0.845403	0.518092	1.63176	0.102729	0.87464
FLT3	Ovarian Cancer	factor(sample_subtypes)others	3.06653	1.50618	2.03596	0.0417539	0.610343
KDR	Head and Neck Cancer	factor(sample_status)1	1.70402	0.83687	2.03619	0.0417317	0.610343
BRCA1	Hepatobiliary Cancer	factor(sample_status)1	1.72833	0.849783	2.03385	0.0419665	0.610343
BRCA2	Melanoma	factor(sample_all$sex)Male	0.467404	0.229522	2.03643	0.0417074	0.610343
RICTOR	Ovarian Cancer	factor(sample_subtypes)others	3.06861	1.50793	2.03498	0.0418528	0.610343
RNF43	Bladder Cancer	factor(sample_status)1	-1.08598	0.53404	-2.03351	0.0420009	0.610343
KMT2D	Non-Small Cell Lung Cancer	factor(aya_status)1	-1.17607	0.721453	-1.63015	0.103071	0.87464
TERT	Pancreatic Cancer	factor(sample_subtypes)Pancreatic Neuroendocrine Tumor	-2.55297	1.25503	-2.03419	0.0419329	0.610343
TGFBR2	Bladder Cancer	factor(sample_subtypes)Upper Tract Urothelial Carcinoma	0.914752	0.449795	2.03371	0.041981	0.610343
AXIN1	Breast Cancer	factor(sample_status)1	1.10922	0.544643	2.0366	0.0416897	0.610343
WHSC1	Hepatobiliary Cancer	factor(sample_subtypes)Intrahepatic Cholangiocarcinoma	-1.82302	0.896106	-2.03438	0.0419136	0.610343
ARID5B	Non-Small Cell Lung Cancer	factor(sample_all$sex)Male	0.531921	0.261577	2.03352	0.0420002	0.610343
TET1	Ovarian Cancer	factor(aya_status)1	1.51912	0.931523	1.63079	0.102935	0.87464
PREX2	Hepatobiliary Cancer	factor(sample_all$sex)Male	-0.906878	0.445704	-2.03471	0.0418799	0.610343
LATS1	Breast Cancer	factor(sample_status)1	0.873365	0.428943	2.03609	0.0417416	0.610343
RTEL1	Endometrial Cancer	factor(sample_status)1	-1.566	0.768907	-2.03666	0.0416843	0.610343
PRDM14	Pancreatic Cancer	factor(sample_status)1	2.20815	1.08475	2.03563	0.0417872	0.610343
ATM	Bladder Cancer	factor(sample_all$sex)Male	0.456386	0.224528	2.03265	0.0420884	0.610832
ROS1	Colorectal Cancer	factor(sample_status)1	-0.413632	0.203589	-2.03169	0.0421846	0.610832
FAM175A	Non-Small Cell Lung Cancer	factor(sample_status)1	1.22854	0.604695	2.03166	0.0421877	0.610832
MET	Ovarian Cancer	factor(aya_status)1	1.99086	1.22375	1.62686	0.103768	0.875214
RIT1	Endometrial Cancer	factor(sample_subtypes)Uterine Serous Carcinoma/Uterine Papillary Serous Carcinoma	-2.60179	1.28024	-2.03226	0.0421269	0.610832
MDC1	Breast Cancer	factor(sample_subtypes)Breast Invasive Lobular Carcinoma	-2.5605	1.26003	-2.03209	0.0421441	0.610832
RAB35	Colorectal Cancer	factor(sample_status)1	-2.0997	1.03359	-2.03146	0.0422087	0.610832
SETD2	Esophagogastric Cancer	factor(sample_status)1	1.3541	0.666707	2.03103	0.0422524	0.61101
BTK	Endometrial Cancer	factor(sample_subtypes)Uterine Endometrioid Carcinoma	-1.67203	0.823459	-2.03049	0.0423065	0.61101
ERCC3	Endometrial Cancer	factor(sample_subtypes)Uterine Serous Carcinoma/Uterine Papillary Serous Carcinoma	-2.46238	1.21279	-2.03035	0.0423206	0.61101
NCOA3	Non-Small Cell Lung Cancer	factor(sample_subtypes)Lung Adenocarcinoma	-1.23627	0.608894	-2.03036	0.0423198	0.61101
AKT3	Colorectal Cancer	factor(sample_subtypes)Rectal Adenocarcinoma	-0.90342	0.445172	-2.02937	0.0424204	0.611161
CTCF	Bladder Cancer	factor(aya_status)1	1.24557	0.765923	1.62624	0.1039	0.875239
EP300	Bladder Cancer	factor(sample_subtypes)others	1.50254	0.740435	2.02927	0.0424307	0.611161
PBRM1	Melanoma	factor(sample_subtypes)Melanoma of Unknown Primary	2.14061	1.0545	2.02997	0.0423594	0.611161
CIC	Endometrial Cancer	factor(sample_subtypes)Uterine Endometrioid Carcinoma	-1.41211	0.69581	-2.02945	0.0424124	0.611161
AMER1	Non-Small Cell Lung Cancer	factor(sample_subtypes)Lung Adenocarcinoma	-0.879599	0.433598	-2.0286	0.0424986	0.61178
FBXW7	Head and Neck Cancer	factor(sample_all$sex)Male	2.11467	1.04258	2.02831	0.0425283	0.611849
BCOR	Endometrial Cancer	factor(sample_subtypes)Uterine Carcinosarcoma/Uterine Malignant Mixed Mullerian Tumor	-2.94065	1.45042	-2.02745	0.0426161	0.612753
CBL	Non-Small Cell Lung Cancer	factor(sample_subtypes)Lung Squamous Cell Carcinoma	-1.29605	0.640204	-2.02443	0.0429254	0.615758
STK11	Esophagogastric Cancer	factor(aya_status)1	1.07231	0.660918	1.62246	0.104706	0.878318
CD79B	Colorectal Cancer	factor(sample_status)1	-1.26181	0.623207	-2.02471	0.0428975	0.615758
RICTOR	Hepatobiliary Cancer	factor(sample_status)1	1.55366	0.767269	2.02492	0.0428754	0.615758
HGF	Non-Small Cell Lung Cancer	factor(sample_subtypes)Lung Squamous Cell Carcinoma	-0.935021	0.461828	-2.02461	0.0429076	0.615758
TP63	Colorectal Cancer	factor(sample_status)1	-0.64032	0.316417	-2.02366	0.043005	0.616539
PIK3CA	Breast Cancer	factor(sample_status)1	-0.155713	0.0769799	-2.02277	0.0430965	0.61677
GRIN2A	Esophagogastric Cancer	factor(sample_status)1	0.943981	0.466665	2.02282	0.0430914	0.61677
RB1	Gastrointestinal Stromal Tumor	factor(aya_status)1	0.954517	0.588888	1.62088	0.105043	0.879523
TRAF2	Non-Small Cell Lung Cancer	factor(sample_status)1	0.678132	0.335178	2.0232	0.0430524	0.61677
PARP1	Endometrial Cancer	factor(sample_subtypes)Uterine Carcinosarcoma/Uterine Malignant Mixed Mullerian Tumor	-2.95029	1.4588	-2.02242	0.0431332	0.616936
WT1	Hepatobiliary Cancer	factor(sample_status)1	1.82896	0.904842	2.02131	0.0432481	0.616941
CD79B	Endometrial Cancer	factor(sample_subtypes)Uterine Endometrioid Carcinoma	-2.39241	1.18366	-2.0212	0.0432593	0.616941
INHBA	Ovarian Cancer	factor(aya_status)1	1.92079	1.18659	1.61875	0.105501	0.881488
ARID2	Colorectal Cancer	factor(sample_subtypes)others	1.62296	0.802696	2.02188	0.0431887	0.616941
ARID1B	Bladder Cancer	factor(sample_subtypes)Upper Tract Urothelial Carcinoma	0.516055	0.255224	2.02197	0.0431796	0.616941
BRCA1	Bladder Cancer	factor(sample_subtypes)Upper Tract Urothelial Carcinoma	-0.87683	0.434374	-2.01861	0.0435283	0.61754
BRCA2	Bladder Cancer	factor(sample_all$sex)Male	0.542826	0.268814	2.01933	0.0434525	0.61754
PPP2R1A	Melanoma	factor(sample_all$sex)Male	-0.804321	0.398423	-2.01876	0.0435122	0.61754
RAC1	Melanoma	factor(sample_subtypes)Melanoma of Unknown Primary	2.15303	1.06618	2.01939	0.0434463	0.61754
TP63	Endometrial Cancer	factor(sample_status)1	-1.0381	0.514182	-2.01894	0.0434932	0.61754
PIK3CG	Ovarian Cancer	factor(aya_status)1	1.9935	1.23209	1.61799	0.105666	0.881702
PLK2	Breast Cancer	factor(sample_subtypes)Breast Invasive Lobular Carcinoma	-1.83929	0.911048	-2.01888	0.0435	0.61754
BAP1	Esophagogastric Cancer	factor(sample_all$sex)Male	-1.51475	0.7507	-2.01778	0.0436142	0.617696
ARID2	Colorectal Cancer	factor(sample_subtypes)Rectal Adenocarcinoma	-0.449906	0.222954	-2.01793	0.0435985	0.617696
XRCC2	Colorectal Cancer	factor(sample_status)1	-0.912853	0.452717	-2.01639	0.0437597	0.618686
SDHAF2	Colorectal Cancer	factor(aya_status)1	1.10569	0.684374	1.61562	0.106178	0.882629
KMT2D	Bladder Cancer	factor(sample_status)1	-0.309323	0.153508	-2.01503	0.0439011	0.619604
TSC1	Endometrial Cancer	factor(sample_status)1	-0.769708	0.38193	-2.01531	0.0438718	0.619604
JAK1	Colorectal Cancer	factor(sample_subtypes)Colorectal Adenocarcinoma	-0.807495	0.400719	-2.01512	0.0438924	0.619604
RAD51D	Non-Small Cell Lung Cancer	factor(sample_subtypes)Lung Squamous Cell Carcinoma	-2.48886	1.23529	-2.0148	0.0439257	0.619604
PRDM1	Colorectal Cancer	factor(aya_status)1	0.601507	0.372364	1.61538	0.106229	0.882632
CYLD	Pancreatic Cancer	factor(sample_status)1	2.18351	1.08404	2.01422	0.0439861	0.620101
APC	Melanoma	factor(sample_subtypes)Cutaneous Melanoma	1.21925	0.605661	2.01309	0.0441055	0.621195
FLT1	Endometrial Cancer	factor(sample_subtypes)Uterine Carcinosarcoma/Uterine Malignant Mixed Mullerian Tumor	-2.57904	1.28119	-2.013	0.0441144	0.621195
RAD52	Colorectal Cancer	factor(sample_subtypes)Rectal Adenocarcinoma	-1.48932	0.740167	-2.01214	0.0442053	0.621375
CDK12	Melanoma	factor(aya_status)1	-1.6387	1.01625	-1.6125	0.106853	0.884818
ACVR1	Colorectal Cancer	factor(sample_status)1	-0.988648	0.491395	-2.01192	0.0442284	0.621375
INSR	Breast Cancer	factor(sample_subtypes)Breast Invasive Ductal Carcinoma	-2.18179	1.08428	-2.01221	0.0441982	0.621375
ANKRD11	Endometrial Cancer	factor(sample_subtypes)Uterine Serous Carcinoma/Uterine Papillary Serous Carcinoma	-2.55052	1.26757	-2.01214	0.0442052	0.621375
INSR	Ovarian Cancer	factor(sample_subtypes)High-Grade Serous Ovarian Cancer	-1.59115	0.79098	-2.01161	0.0442606	0.621471
EPHA5	Endometrial Cancer	factor(sample_status)1	-0.591858	0.294271	-2.01127	0.0442971	0.621628
GRIN2A	Endometrial Cancer	factor(sample_subtypes)Uterine Serous Carcinoma/Uterine Papillary Serous Carcinoma	-2.42413	1.20544	-2.01098	0.0443271	0.621694
ERRFI1	Colorectal Cancer	factor(aya_status)1	0.74931	0.464666	1.61258	0.106836	0.884818
DNMT3A	Bladder Cancer	factor(sample_status)1	-1.22136	0.607631	-2.01003	0.044428	0.622753
ROS1	Endometrial Cancer	factor(sample_subtypes)Uterine Carcinosarcoma/Uterine Malignant Mixed Mullerian Tumor	-2.5682	1.27857	-2.00865	0.0445746	0.624173
TAP1	Non-Small Cell Lung Cancer	factor(sample_status)1	0.778481	0.387575	2.00859	0.0445801	0.624173
NRAS	Ovarian Cancer	factor(sample_subtypes)others	2.98876	1.48827	2.00821	0.0446212	0.624391
PBRM1	Endometrial Cancer	factor(sample_subtypes)Uterine Endometrioid Carcinoma	-1.6837	0.838831	-2.00719	0.044729	0.625543
IRS1	Ovarian Cancer	factor(aya_status)1	1.50865	0.935533	1.6126	0.10683	0.884818
PIK3R1	Breast Cancer	factor(sample_status)1	0.544767	0.271452	2.00686	0.0447647	0.625687
NOTCH4	Colorectal Cancer	factor(sample_subtypes)others	1.60534	0.800247	2.00606	0.0448504	0.626526
ATRX	Breast Cancer	factor(sample_status)1	0.648877	0.323551	2.00549	0.0449108	0.626697
PTCH1	Endometrial Cancer	factor(sample_status)1	-0.681676	0.340031	-2.00475	0.0449902	0.626697
CRLF2	Colorectal Cancer	factor(sample_status)1	-2.07552	1.03526	-2.00484	0.0449802	0.626697
ARID5B	Endometrial Cancer	factor(sample_subtypes)Uterine Endometrioid Carcinoma	-1.40555	0.701099	-2.00478	0.044987	0.626697
NEGR1	Endometrial Cancer	factor(sample_status)1	-1.54743	0.771802	-2.00496	0.044967	0.626697
IGF1R	Ovarian Cancer	factor(aya_status)1	1.94991	1.21043	1.61093	0.107195	0.88571
REL	Colorectal Cancer	factor(sample_status)1	-0.903047	0.450736	-2.0035	0.045124	0.627847
KDM5A	Endometrial Cancer	factor(sample_subtypes)Uterine Serous Carcinoma/Uterine Papillary Serous Carcinoma	-2.54097	1.26818	-2.00363	0.0451102	0.627847
RPTOR	Hepatobiliary Cancer	factor(sample_subtypes)Gallbladder Adenocarcinoma, NOS	1.87797	0.937752	2.00263	0.0452174	0.628079
PAK1	Breast Cancer	factor(sample_status)1	1.35889	0.678485	2.00282	0.0451964	0.628079
MAP2K1	Hepatobiliary Cancer	factor(sample_status)1	1.70765	0.852814	2.00237	0.0452448	0.628104
CHEK1	Colorectal Cancer	factor(aya_status)1	0.640352	0.397353	1.61154	0.107061	0.88571
ATR	Colorectal Cancer	factor(sample_subtypes)Rectal Adenocarcinoma	-0.485897	0.242731	-2.0018	0.0453068	0.628609
PIK3CA	Colorectal Cancer	factor(sample_subtypes)Colorectal Adenocarcinoma	-0.258233	0.129091	-2.00039	0.0454576	0.629279
MPL	Bladder Cancer	factor(sample_all$sex)Male	2.05776	1.02839	2.00095	0.0453978	0.629279
HGF	Esophagogastric Cancer	factor(sample_subtypes)Stomach Adenocarcinoma	-1.26396	0.63175	-2.00074	0.0454207	0.629279
DNAJB1	Non-Small Cell Lung Cancer	factor(sample_all$sex)Male	-1.34393	0.671821	-2.00043	0.0454542	0.629279
CTCF	Colorectal Cancer	factor(sample_subtypes)Rectal Adenocarcinoma	-0.516414	0.258286	-1.99939	0.0455666	0.629486
LMO1	Non-Small Cell Lung Cancer	factor(sample_all$sex)Male	0.764177	0.382107	1.9999	0.0455107	0.629486
PAK7	Endometrial Cancer	factor(sample_subtypes)Uterine Serous Carcinoma/Uterine Papillary Serous Carcinoma	-2.42866	1.21475	-1.99931	0.0455752	0.629486
BMPR1A	Colorectal Cancer	factor(aya_status)1	0.5666	0.352927	1.60543	0.1084	0.891033
PTPRT	Endometrial Cancer	factor(sample_status)1	-0.556054	0.27822	-1.99861	0.0456501	0.630166
RAD54L	Colorectal Cancer	factor(sample_all$sex)Male	0.592196	0.29634	1.99837	0.0456764	0.630176
RRAS	Endometrial Cancer	factor(sample_subtypes)Uterine Carcinosarcoma/Uterine Malignant Mixed Mullerian Tumor	-3.11318	1.55852	-1.99752	0.0457686	0.631093
XPO1	Non-Small Cell Lung Cancer	factor(sample_status)1	0.540299	0.270616	1.99655	0.0458743	0.63184
PGR	Melanoma	factor(sample_subtypes)Cutaneous Melanoma	2.04214	1.02275	1.9967	0.0458576	0.63184
DICER1	Endometrial Cancer	factor(sample_status)1	-0.65053	0.326212	-1.99419	0.0461308	0.634661
NOTCH4	Colorectal Cancer	factor(sample_subtypes)Rectal Adenocarcinoma	-0.443818	0.222602	-1.99377	0.0461771	0.634942
CDKN1B	Breast Cancer	factor(aya_status)1	-1.62656	1.01402	-1.60407	0.108699	0.892278
CTNNB1	Hepatobiliary Cancer	factor(sample_subtypes)Intrahepatic Cholangiocarcinoma	-1.54134	0.773588	-1.99245	0.0463217	0.635656
ERBB2	Renal Cell Carcinoma	factor(sample_status)1	1.72222	0.864417	1.99235	0.0463327	0.635656
MDM2	Breast Cancer	factor(sample_subtypes)Breast Invasive Lobular Carcinoma	-2.88261	1.44657	-1.99272	0.046292	0.635656
EPHA3	Head and Neck Cancer	factor(sample_status)1	1.37731	0.691095	1.99294	0.046268	0.635656
CDKN2A	Colorectal Cancer	factor(sample_subtypes)Colorectal Adenocarcinoma	-1.44643	0.726273	-1.99158	0.0464168	0.636454
CTNNB1	Bladder Cancer	factor(sample_subtypes)Upper Tract Urothelial Carcinoma	-1.20319	0.604266	-1.99115	0.0464639	0.636745
BRCA1	Melanoma	factor(aya_status)1	-1.63015	1.01752	-1.60208	0.109138	0.894017
TP53	Melanoma	factor(sample_subtypes)others	1.13983	0.572714	1.99022	0.0465669	0.637109
CSF1R	Endometrial Cancer	factor(sample_subtypes)Uterine Carcinosarcoma/Uterine Malignant Mixed Mullerian Tumor	-2.90168	1.45866	-1.98927	0.046671	0.637109
BRD4	Breast Cancer	factor(sample_subtypes)Breast Invasive Ductal Carcinoma	-2.15192	1.08146	-1.98984	0.0466088	0.637109
CD274	Endometrial Cancer	factor(sample_subtypes)Uterine Endometrioid Carcinoma	-2.3392	1.17574	-1.98956	0.0466393	0.637109
FLT4	Ovarian Cancer	factor(aya_status)1	1.93738	1.21053	1.60044	0.1095	0.895108
PREX2	Pancreatic Cancer	factor(sample_all$sex)Male	1.02669	0.515894	1.99011	0.0465787	0.637109
MDC1	Pancreatic Cancer	factor(sample_all$sex)Male	-1.31418	0.660637	-1.98926	0.0466722	0.637109
TERT	Melanoma	factor(sample_subtypes)Cutaneous Melanoma	2.02796	1.01962	1.98894	0.0467078	0.637158
ARID5B	Endometrial Cancer	factor(sample_status)1	-0.60568	0.304552	-1.98876	0.0467277	0.637158
PIK3CG	Breast Cancer	factor(aya_status)1	-1.62183	1.01484	-1.59812	0.110016	0.89706
NBN	Melanoma	factor(sample_all$sex)Male	2.06092	1.03688	1.98762	0.0468532	0.638515
BCL6	Non-Small Cell Lung Cancer	factor(sample_status)1	-0.643812	0.324215	-1.98576	0.04706	0.640622
DIS3	Endometrial Cancer	factor(sample_subtypes)Uterine Endometrioid Carcinoma	-1.63612	0.823913	-1.98579	0.0470564	0.640622
JUN	Colorectal Cancer	factor(sample_status)1	-0.57315	0.288729	-1.98508	0.0471354	0.640962
ZFHX3	Hepatobiliary Cancer	factor(sample_status)1	0.959454	0.483337	1.98506	0.0471372	0.640962
CTLA4	Colorectal Cancer	factor(sample_status)1	-0.978127	0.492807	-1.98481	0.0471661	0.640999
STAG2	Bladder Cancer	factor(sample_status)1	-0.471733	0.237798	-1.98375	0.0472833	0.641527
PLCG2	Melanoma	factor(aya_status)1	-0.96156	0.601918	-1.59749	0.110156	0.89706
FAM46C	Bladder Cancer	factor(sample_all$sex)Male	-1.0785	0.543665	-1.98375	0.0472832	0.641527
BRIP1	Colorectal Cancer	factor(sample_status)1	-0.629029	0.317237	-1.98284	0.0473857	0.64256
FLT3	Melanoma	factor(aya_status)1	-0.695997	0.435942	-1.59654	0.110369	0.897879
EZH2	Non-Small Cell Lung Cancer	factor(sample_all$sex)Male	0.665845	0.335858	1.98252	0.0474216	0.642692
ALK	Colorectal Cancer	factor(sample_subtypes)others	1.58435	0.799584	1.98147	0.0475386	0.643304
AKT3	Colorectal Cancer	factor(sample_subtypes)Colorectal Adenocarcinoma	-1.44648	0.730025	-1.98141	0.0475454	0.643304
ASXL1	Breast Cancer	factor(sample_status)1	0.888428	0.448547	1.98068	0.0476274	0.643705
EGFR	Bladder Cancer	factor(sample_all$sex)Male	-0.608378	0.307304	-1.97972	0.0477346	0.643735
ATRX	Breast Cancer	factor(sample_all$sex)Male	1.59233	0.804105	1.98025	0.0476755	0.643735
STAT3	Endometrial Cancer	factor(sample_subtypes)Uterine Carcinosarcoma/Uterine Malignant Mixed Mullerian Tumor	-2.54957	1.2878	-1.97979	0.0477277	0.643735
PIK3R1	Breast Cancer	factor(aya_status)1	-1.1544	0.723808	-1.5949	0.110734	0.899652
NCOR1	Bladder Cancer	factor(sample_status)1	-0.607708	0.306917	-1.98004	0.047699	0.643735
EPCAM	Bladder Cancer	factor(sample_status)1	1.25962	0.636393	1.97932	0.0477804	0.643998
STK11	Hepatobiliary Cancer	factor(sample_subtypes)Intrahepatic Cholangiocarcinoma	-1.05911	0.535223	-1.97883	0.0478354	0.644387
JAK2	Endometrial Cancer	factor(sample_status)1	-0.893677	0.452628	-1.97442	0.0483342	0.644758
VEGFA	Bladder Cancer	factor(aya_status)1	1.72609	1.08494	1.59096	0.111619	0.902958
BRCA2	Non-Small Cell Lung Cancer	factor(sample_status)1	0.316878	0.160493	1.9744	0.0483358	0.644758
BRIP1	Colorectal Cancer	factor(sample_subtypes)Rectal Adenocarcinoma	-0.765908	0.387713	-1.97545	0.0482169	0.644758
PALB2	Pancreatic Cancer	factor(sample_status)1	1.09069	0.551981	1.97595	0.0481599	0.644758
IL7R	Bladder Cancer	factor(sample_subtypes)Upper Tract Urothelial Carcinoma	0.981491	0.496286	1.97767	0.0479659	0.644758
PLCG2	Esophagogastric Cancer	factor(aya_status)1	1.06323	0.668929	1.58945	0.111959	0.90386
RAD51C	Melanoma	factor(sample_all$sex)Male	2.05265	1.03925	1.97512	0.0482544	0.644758
DAXX	Endometrial Cancer	factor(sample_subtypes)Uterine Endometrioid Carcinoma	-1.62687	0.823828	-1.97477	0.0482944	0.644758
AXIN1	Pancreatic Cancer	factor(sample_status)1	1.09069	0.551981	1.97595	0.0481599	0.644758
FGFR1	Colorectal Cancer	factor(aya_status)1	0.510586	0.321455	1.58836	0.112205	0.904721
RHOA	Non-Small Cell Lung Cancer	factor(sample_status)1	0.91469	0.462875	1.97611	0.0481428	0.644758
ARID1A	Colorectal Cancer	factor(aya_status)1	0.258947	0.163164	1.58704	0.112504	0.905941
WHSC1	Breast Cancer	factor(sample_status)1	1.2599	0.637798	1.97539	0.0482238	0.644758
KMT2C	Pancreatic Cancer	factor(sample_subtypes)Pancreatic Adenocarcinoma	-2.29999	1.16278	-1.97801	0.0479274	0.644758
PDCD1	Melanoma	factor(sample_status)1	-0.968207	0.489698	-1.97715	0.0480246	0.644758
INSR	Breast Cancer	factor(sample_status)1	1.0727	0.543129	1.97503	0.0482648	0.644758
PTPRT	Non-Small Cell Lung Cancer	factor(aya_status)1	-1.13683	0.717598	-1.58421	0.113146	0.90631
EIF4A2	Non-Small Cell Lung Cancer	factor(sample_subtypes)Lung Adenocarcinoma	-1.4812	0.750108	-1.97465	0.0483082	0.644758
MDC1	Melanoma	factor(sample_subtypes)Melanoma of Unknown Primary	1.28681	0.651289	1.9758	0.0481779	0.644758
ANKRD11	Breast Cancer	factor(sample_status)1	0.56772	0.28711	1.97736	0.0480008	0.644758
CEBPA	Bladder Cancer	factor(sample_subtypes)others	2.20876	1.11933	1.9733	0.0484619	0.645738
IKBKE	Colorectal Cancer	factor(sample_status)1	-0.784422	0.397502	-1.97338	0.0484524	0.645738
FUBP1	Endometrial Cancer	factor(sample_subtypes)Uterine Endometrioid Carcinoma	-1.61956	0.820954	-1.97278	0.0485208	0.646171
ARID1A	Head and Neck Cancer	factor(aya_status)1	1.38478	0.875412	1.58186	0.113681	0.90649
RHOA	Bladder Cancer	factor(sample_status)1	-0.941412	0.477291	-1.97241	0.0485631	0.646384
XIAP	Melanoma	factor(sample_all$sex)Male	-1.13666	0.57657	-1.97141	0.0486764	0.647542
IKZF1	Esophagogastric Cancer	factor(sample_subtypes)Esophageal Adenocarcinoma	-1.66733	0.846008	-1.97083	0.0487439	0.648088
PIK3CB	Colorectal Cancer	factor(sample_subtypes)Rectal Adenocarcinoma	-0.660485	0.33526	-1.97007	0.0488307	0.648891
MAPK3	Bladder Cancer	factor(sample_subtypes)Upper Tract Urothelial Carcinoma	1.05996	0.538121	1.96974	0.0488682	0.649037
RASA1	Colorectal Cancer	factor(aya_status)1	0.443789	0.280416	1.58261	0.11351	0.90649
[truncated: 22,545 more rows]

## Sheet: mskmet_model2
Gene	Cancer Type	Variable	Estimate	Std..Error	z.value	P value	FDR
ARID1A	Ovarian Cancer	factor(sample_subtypes)High-Grade Serous Ovarian Cancer	-3.96564	0.286623	-13.8358	1.55089e-43	4.90407e-39
TP53	Ovarian Cancer	factor(sample_subtypes)High-Grade Serous Ovarian Cancer	4.61521	0.339201	13.6061	3.68155e-42	5.82071e-38
PIK3CA	Ovarian Cancer	factor(sample_subtypes)High-Grade Serous Ovarian Cancer	-2.90291	0.263624	-11.0116	3.36074e-28	3.54233e-24
TP53	Non-Small Cell Lung Cancer	relevel(factor(race), ref = "Stage IV")Stage I	-0.974723	0.0990337	-9.84233	7.3977e-23	5.84807e-19
SF3B1	Melanoma	factor(sample_subtypes)Cutaneous Melanoma	-2.63103	0.281796	-9.33665	9.9431e-21	6.28821e-17
STK11	Non-Small Cell Lung Cancer	factor(sample_subtypes)Lung Squamous Cell Carcinoma	-3.41542	0.387879	-8.80536	1.3043e-18	6.87388e-15
FGFR3	Bladder Cancer	relevel(factor(race), ref = "Stage IV")Stage I	1.1602	0.158392	7.32488	2.39111e-13	1.08013e-09
TP53	Bladder Cancer	relevel(factor(race), ref = "Stage IV")Stage I	-1.26322	0.175155	-7.21202	5.51282e-13	2.17901e-09
KEAP1	Non-Small Cell Lung Cancer	factor(sample_all$sex)Male	0.586384	0.082012	7.14999	8.67868e-13	3.0492e-09
ARID1A	Colorectal Cancer	relevel(factor(race), ref = "Stage IV")Stage I	1.31004	0.184611	7.09624	1.28194e-12	4.05362e-09
TP53	Soft Tissue Sarcoma	factor(sample_subtypes)Undifferentiated Pleomorphic Sarcoma/Malignant Fibrous Histiocytoma/High-Grade Spindle Cell Sarcoma	3.08999	0.446057	6.92735	4.28811e-12	1.23268e-08
TP53	Soft Tissue Sarcoma	factor(sample_subtypes)Leiomyosarcoma	3.11619	0.455397	6.8428	7.76603e-12	2.04641e-08
RB1	Non-Small Cell Lung Cancer	factor(sample_subtypes)Lung Adenocarcinoma	-1.75918	0.259924	-6.76804	1.30538e-11	3.1752e-08
HRAS	Bladder Cancer	factor(sample_subtypes)Upper Tract Urothelial Carcinoma	1.90763	0.283194	6.73612	1.62677e-11	3.5532e-08
MLH1	Colorectal Cancer	relevel(factor(race), ref = "Stage IV")Stage I	1.92127	0.285438	6.73096	1.68553e-11	3.5532e-08
ATRX	Non-Small Cell Lung Cancer	factor(sample_all$sex)Male	-1.03222	0.156592	-6.59177	4.3462e-11	8.58944e-08
KMT2D	Colorectal Cancer	relevel(factor(race), ref = "Stage IV")Stage I	1.25375	0.191693	6.54042	6.13456e-11	1.10869e-07
SPOP	Ovarian Cancer	factor(sample_subtypes)High-Grade Serous Ovarian Cancer	-4.26379	0.652338	-6.53618	6.31115e-11	1.10869e-07
AXIN2	Colorectal Cancer	relevel(factor(race), ref = "Stage IV")Stage I	1.47355	0.235394	6.25993	3.85151e-10	6.40992e-07
EGFR	Non-Small Cell Lung Cancer	factor(sample_all$sex)Male	-0.40584	0.0650144	-6.24231	4.31149e-10	6.81668e-07
MED12	Non-Small Cell Lung Cancer	factor(sample_all$sex)Male	-0.94644	0.155372	-6.09143	1.11905e-09	1.68503e-06
SF3B1	Melanoma	factor(sample_subtypes)Melanoma of Unknown Primary	-2.28718	0.380341	-6.0135	1.81557e-09	2.60956e-06
TP53	Breast Cancer	relevel(factor(race), ref = "Stage IV")Stage I	-0.664559	0.112256	-5.92003	3.21892e-09	4.15881e-06
PIK3R1	Ovarian Cancer	factor(sample_subtypes)High-Grade Serous Ovarian Cancer	-2.92755	0.494086	-5.92519	3.11945e-09	4.15881e-06
CBFB	Breast Cancer	relevel(factor(race), ref = "Stage IV")Stage I	1.07957	0.182466	5.91653	3.28801e-09	4.15881e-06
KRAS	Hepatobiliary Cancer	factor(sample_subtypes)Intrahepatic Cholangiocarcinoma	-1.47324	0.253364	-5.81472	6.0734e-09	7.38642e-06
KRAS	Non-Small Cell Lung Cancer	factor(sample_subtypes)Lung Squamous Cell Carcinoma	-1.95825	0.340982	-5.74299	9.30218e-09	1.05051e-05
ARID1B	Colorectal Cancer	relevel(factor(race), ref = "Stage IV")Stage I	1.36865	0.238281	5.74387	9.25347e-09	1.05051e-05
KIT	Melanoma	factor(sample_subtypes)Cutaneous Melanoma	-1.72106	0.311067	-5.53276	3.15227e-08	3.43717e-05
CD79B	Colorectal Cancer	relevel(factor(race), ref = "Stage IV")Stage I	2.56203	0.463879	5.52305	3.33161e-08	3.51162e-05
BRAF	Colorectal Cancer	factor(sample_subtypes)Rectal Adenocarcinoma	-0.945001	0.172136	-5.48986	4.02258e-08	4.10316e-05
CTLA4	Colorectal Cancer	relevel(factor(race), ref = "Stage IV")Stage I	2.2465	0.410495	5.47266	4.4333e-08	4.3808e-05
BAP1	Renal Cell Carcinoma	factor(sample_all$sex)Male	-1.43855	0.267567	-5.37642	7.59799e-08	7.28048e-05
MEN1	Colorectal Cancer	relevel(factor(race), ref = "Stage IV")Stage I	1.90575	0.356431	5.34676	8.95414e-08	8.32762e-05
KRAS	Ovarian Cancer	factor(sample_subtypes)High-Grade Serous Ovarian Cancer	-2.41635	0.456615	-5.29187	1.21073e-07	0.000109385
KRAS	Pancreatic Cancer	factor(aya_status)1	-1.9055	0.361794	-5.26682	1.38804e-07	0.00012192
CTNNB1	Endometrial Cancer	factor(aya_status)1	2.5588	0.487256	5.25145	1.50904e-07	0.000128966
ATRX	Colorectal Cancer	factor(sample_all$sex)Male	-0.899012	0.172223	-5.22004	1.78884e-07	0.000145039
RNF43	Colorectal Cancer	relevel(factor(race), ref = "Stage IV")Stage I	1.10832	0.212148	5.22428	1.74831e-07	0.000145039
PIK3CA	Breast Cancer	factor(aya_status)1	-0.769523	0.148011	-5.19911	2.00247e-07	0.000158301
ESR1	Breast Cancer	relevel(factor(race), ref = "Stage IV")Stage I	-1.78189	0.344019	-5.17962	2.22342e-07	0.00017148
BIRC3	Non-Small Cell Lung Cancer	factor(sample_subtypes)Lung Adenocarcinoma	-2.42175	0.475932	-5.08845	3.6101e-07	0.000271798
BCOR	Non-Small Cell Lung Cancer	factor(sample_all$sex)Male	-0.916879	0.180909	-5.06817	4.01664e-07	0.000290948
PPP2R1A	Ovarian Cancer	factor(sample_subtypes)High-Grade Serous Ovarian Cancer	-1.90556	0.376098	-5.06666	4.04848e-07	0.000290948
ARID1A	Ovarian Cancer	factor(sample_subtypes)Low-Grade Serous Ovarian Cancer	-5.19512	1.03371	-5.02568	5.0166e-07	0.000352511
STK11	Non-Small Cell Lung Cancer	factor(sample_all$sex)Male	0.402049	0.0805479	4.99143	5.99329e-07	0.000403221
KLF4	Colorectal Cancer	relevel(factor(race), ref = "Stage IV")Stage II/III	2.9225	0.585363	4.99263	5.95629e-07	0.000403221
BRAF	Melanoma	factor(sample_subtypes)Cutaneous Melanoma	2.95826	0.594169	4.97883	6.39698e-07	0.000421414
TP53	Head and Neck Cancer	factor(sample_subtypes)Oropharynx Squamous Cell Carcinoma	-1.52658	0.307216	-4.96906	6.7279e-07	0.000434169
TP53	Endometrial Cancer	factor(sample_subtypes)Uterine Serous Carcinoma/Uterine Papillary Serous Carcinoma	3.20383	0.645305	4.96483	6.87613e-07	0.00043486
TP53	Colorectal Cancer	relevel(factor(race), ref = "Stage IV")Stage I	-0.796533	0.16114	-4.94311	7.68848e-07	0.000476701
GATA2	Colorectal Cancer	relevel(factor(race), ref = "Stage IV")Stage I	1.73104	0.350767	4.93502	8.01442e-07	0.000487354
BRAF	Melanoma	factor(sample_subtypes)Melanoma of Unknown Primary	3.00312	0.610156	4.92189	8.57142e-07	0.00050192
TP53	Hepatobiliary Cancer	factor(sample_subtypes)Intrahepatic Cholangiocarcinoma	-1.09965	0.223392	-4.92251	8.54401e-07	0.00050192
SH2B3	Colorectal Cancer	relevel(factor(race), ref = "Stage IV")Stage I	1.51087	0.307518	4.91309	8.96508e-07	0.000515427
POLE	Colorectal Cancer	relevel(factor(race), ref = "Stage IV")Stage I	1.17932	0.240392	4.90584	9.30282e-07	0.000516974
TEK	Colorectal Cancer	relevel(factor(race), ref = "Stage IV")Stage II/III	2.4171	0.492733	4.9055	9.31898e-07	0.000516974
CTNNB1	Hepatobiliary Cancer	factor(sample_subtypes)Hepatocellular Carcinoma	2.60966	0.533349	4.89298	9.93228e-07	0.000541497
STAG2	Melanoma	factor(sample_all$sex)Male	-1.43188	0.29686	-4.8234	1.41128e-06	0.000756376
KRAS	Endometrial Cancer	factor(sample_subtypes)Uterine Serous Carcinoma/Uterine Papillary Serous Carcinoma	-3.07834	0.643733	-4.78201	1.7355e-06	0.000907754
DNAJB1	Non-Small Cell Lung Cancer	factor(sample_subtypes)Lung Adenocarcinoma	-3.4026	0.712297	-4.77694	1.77985e-06	0.000907754
TGFBR1	Colorectal Cancer	relevel(factor(race), ref = "Stage IV")Stage I	1.5969	0.334211	4.77814	1.76928e-06	0.000907754
NKX2-1	Non-Small Cell Lung Cancer	relevel(factor(race), ref = "Stage IV")Stage I	1.11947	0.234508	4.77369	1.80883e-06	0.00090789
RNF43	Colorectal Cancer	factor(sample_subtypes)Rectal Adenocarcinoma	-0.879978	0.185736	-4.7378	2.1605e-06	0.00106746
HIST1H1C	Colorectal Cancer	relevel(factor(race), ref = "Stage IV")Stage II/III	2.72016	0.574665	4.73347	2.20712e-06	0.00107371
ATRX	Melanoma	factor(sample_all$sex)Male	-0.97135	0.20559	-4.7247	2.30455e-06	0.00110412
KRAS	Hepatobiliary Cancer	factor(sample_subtypes)Gallbladder Cancer	-1.79147	0.380484	-4.70839	2.49683e-06	0.00117839
PIK3CA	Colorectal Cancer	factor(sample_subtypes)Rectal Adenocarcinoma	-0.529883	0.112935	-4.69191	2.70665e-06	0.00125863
CDH1	Breast Cancer	factor(sample_subtypes)Breast Invasive Lobular Carcinoma	3.05997	0.65436	4.67628	2.92122e-06	0.00133873
TSC2	Colorectal Cancer	relevel(factor(race), ref = "Stage IV")Stage I	1.24785	0.268106	4.65432	3.25054e-06	0.00144768
HIST3H3	Colorectal Cancer	relevel(factor(race), ref = "Stage IV")Stage I	2.45258	0.526624	4.65717	3.20583e-06	0.00144768
TET1	Colorectal Cancer	relevel(factor(race), ref = "Stage IV")Stage I	1.28328	0.276007	4.64943	3.32859e-06	0.00146185
RARA	Colorectal Cancer	relevel(factor(race), ref = "Stage IV")Stage I	1.70357	0.367889	4.63067	3.64493e-06	0.00157885
PIK3CG	Non-Small Cell Lung Cancer	factor(sample_subtypes)Lung Adenocarcinoma	-1.43841	0.311196	-4.62222	3.79664e-06	0.00162235
ABL1	Colorectal Cancer	relevel(factor(race), ref = "Stage IV")Stage I	1.39876	0.303667	4.60623	4.10025e-06	0.00172872
TBX3	Endometrial Cancer	factor(sample_subtypes)Uterine Serous Carcinoma/Uterine Papillary Serous Carcinoma	-3.88793	0.844746	-4.60249	4.1747e-06	0.00173695
FGFR2	Colorectal Cancer	relevel(factor(race), ref = "Stage IV")Stage I	1.58782	0.345397	4.59709	4.28441e-06	0.00175945
STK11	Non-Small Cell Lung Cancer	factor(sample_subtypes)Lung Adenocarcinoma	-1.02956	0.224494	-4.58614	4.51523e-06	0.0018085
TGFBR2	Colorectal Cancer	factor(sample_subtypes)Rectal Adenocarcinoma	-1.41341	0.308378	-4.58337	4.57543e-06	0.0018085
HIST1H1C	Colorectal Cancer	relevel(factor(race), ref = "Stage IV")Stage I	1.9042	0.415303	4.58508	4.53811e-06	0.0018085
RB1	Bladder Cancer	factor(sample_subtypes)Upper Tract Urothelial Carcinoma	-1.60526	0.350912	-4.57453	4.773e-06	0.0018207
FANCA	Colorectal Cancer	relevel(factor(race), ref = "Stage IV")Stage I	1.38781	0.303395	4.57426	4.77905e-06	0.0018207
KMT2D	Colorectal Cancer	factor(sample_subtypes)Rectal Adenocarcinoma	-0.742864	0.162353	-4.57562	4.7481e-06	0.0018207
KMT2C	Colorectal Cancer	relevel(factor(race), ref = "Stage IV")Stage I	1.03127	0.225829	4.56658	4.9574e-06	0.00186617
TP53	Non-Small Cell Lung Cancer	factor(sample_subtypes)Lung Adenocarcinoma	-1.0708	0.237383	-4.51087	6.45637e-06	0.00240185
KRAS	Colorectal Cancer	factor(sample_all$sex)Male	-0.300198	0.0666754	-4.50238	6.71982e-06	0.00244239
FAT1	Colorectal Cancer	factor(sample_subtypes)Rectal Adenocarcinoma	-0.985332	0.218829	-4.50275	6.70784e-06	0.00244239
B2M	Colorectal Cancer	relevel(factor(race), ref = "Stage IV")Stage I	1.19969	0.267727	4.48101	7.42894e-06	0.00266944
GNAQ	Melanoma	factor(sample_subtypes)Uveal Melanoma	2.80325	0.627447	4.46771	7.90605e-06	0.00280896
KEAP1	Non-Small Cell Lung Cancer	factor(sample_subtypes)Lung Squamous Cell Carcinoma	-1.1706	0.26316	-4.44824	8.65773e-06	0.00297848
STAT3	Ovarian Cancer	factor(sample_subtypes)High-Grade Serous Ovarian Cancer	-2.5337	0.569243	-4.45101	8.54677e-06	0.00297848
HIST1H1C	Non-Small Cell Lung Cancer	factor(sample_subtypes)Lung Adenocarcinoma	-2.03879	0.458356	-4.44804	8.66576e-06	0.00297848
NF1	Endometrial Cancer	factor(sample_subtypes)Uterine Serous Carcinoma/Uterine Papillary Serous Carcinoma	-3.36552	0.761151	-4.42162	9.79655e-06	0.0032955
CASP8	Colorectal Cancer	relevel(factor(race), ref = "Stage IV")Stage I	1.21712	0.275186	4.42291	9.73786e-06	0.0032955
KIT	Melanoma	factor(sample_subtypes)Melanoma of Unknown Primary	-1.99473	0.454711	-4.38681	1.15024e-05	0.00379233
AXIN2	Non-Small Cell Lung Cancer	factor(sample_subtypes)Lung Adenocarcinoma	-1.84395	0.42036	-4.38661	1.15133e-05	0.00379233
FLT1	Colorectal Cancer	relevel(factor(race), ref = "Stage IV")Stage II/III	2.01902	0.462896	4.36171	1.29047e-05	0.0042068
EGFR	Non-Small Cell Lung Cancer	factor(sample_subtypes)Lung Adenocarcinoma	2.22947	0.512564	4.34965	1.36357e-05	0.00439975
PTEN	Endometrial Cancer	factor(sample_subtypes)Uterine Serous Carcinoma/Uterine Papillary Serous Carcinoma	-2.83026	0.651619	-4.34342	1.4028e-05	0.00448059
SETD2	Colorectal Cancer	relevel(factor(race), ref = "Stage IV")Stage I	1.16092	0.267908	4.33327	1.4691e-05	0.00464544
MAP3K13	Colorectal Cancer	relevel(factor(race), ref = "Stage IV")Stage II/III	2.19558	0.507148	4.32927	1.49602e-05	0.00468374
PTCH1	Colorectal Cancer	relevel(factor(race), ref = "Stage IV")Stage I	1.15643	0.267368	4.32523	1.5237e-05	0.00472361
PIK3CA	Ovarian Cancer	factor(sample_subtypes)Low-Grade Serous Ovarian Cancer	-4.44721	1.03027	-4.31656	1.58483e-05	0.00486542
KRAS	Non-Small Cell Lung Cancer	factor(aya_status)1	-1.98856	0.462143	-4.30292	1.68565e-05	0.00512518
BLM	Colorectal Cancer	relevel(factor(race), ref = "Stage IV")Stage I	1.34999	0.314233	4.29612	1.73811e-05	0.00523435
SPEN	Colorectal Cancer	relevel(factor(race), ref = "Stage IV")Stage I	1.08432	0.253918	4.27035	1.9517e-05	0.00582213
GRIN2A	Colorectal Cancer	relevel(factor(race), ref = "Stage IV")Stage I	1.03456	0.242698	4.26272	2.01952e-05	0.00596817
EP300	Colorectal Cancer	factor(sample_subtypes)Rectal Adenocarcinoma	-1.10518	0.260286	-4.24602	2.17605e-05	0.00637118
TP53	Head and Neck Cancer	factor(sample_all$sex)Male	-1.15151	0.271814	-4.23641	2.27127e-05	0.00655119
TP63	Colorectal Cancer	relevel(factor(race), ref = "Stage IV")Stage I	1.5289	0.360961	4.23565	2.27896e-05	0.00655119
NF1	Colorectal Cancer	factor(aya_status)1	0.830493	0.196767	4.22069	2.43556e-05	0.00693827
CTNNB1	Colorectal Cancer	relevel(factor(race), ref = "Stage IV")Stage I	1.00377	0.238255	4.21299	2.52013e-05	0.00705213
CTNNB1	Colorectal Cancer	factor(sample_subtypes)Rectal Adenocarcinoma	-0.92025	0.218362	-4.21433	2.50517e-05	0.00705213
GNA11	Melanoma	factor(sample_subtypes)Uveal Melanoma	4.32447	1.02777	4.2076	2.58095e-05	0.00715896
SMAD4	Hepatobiliary Cancer	relevel(factor(race), ref = "Stage IV")others	2.03326	0.484877	4.19335	2.74859e-05	0.00755768
IDH1	Hepatobiliary Cancer	factor(sample_subtypes)Intrahepatic Cholangiocarcinoma	2.50111	0.596938	4.1899	2.79082e-05	0.00760763
IGF2	Colorectal Cancer	relevel(factor(race), ref = "Stage IV")Stage I	1.84025	0.439988	4.18249	2.88334e-05	0.00772662
MSH3	Colorectal Cancer	factor(sample_subtypes)Rectal Adenocarcinoma	-1.2056	0.288199	-4.18322	2.87408e-05	0.00772662
DOT1L	Non-Small Cell Lung Cancer	factor(sample_all$sex)Male	0.72939	0.17454	4.17892	2.92892e-05	0.0077828
TP53	Colorectal Cancer	factor(sample_subtypes)Rectal Adenocarcinoma	0.41271	0.0992177	4.15964	3.18751e-05	0.00839936
NF1	Endometrial Cancer	factor(sample_subtypes)Uterine Carcinosarcoma/Uterine Malignant Mixed Mullerian Tumor	-3.48861	0.844753	-4.12974	3.63172e-05	0.00943001
SDHB	Non-Small Cell Lung Cancer	factor(sample_subtypes)Lung Adenocarcinoma	-2.35541	0.57041	-4.12933	3.63828e-05	0.00943001
TERT	Colorectal Cancer	relevel(factor(race), ref = "Stage IV")Stage II/III	1.90092	0.46132	4.12062	3.77853e-05	0.0097139
ATM	Colorectal Cancer	relevel(factor(race), ref = "Stage IV")Stage I	0.910922	0.221184	4.11838	3.81545e-05	0.0097297
TP53	Pancreatic Cancer	factor(aya_status)1	-1.31993	0.32115	-4.11002	3.95617e-05	0.0100078
TP53	Soft Tissue Sarcoma	factor(sample_subtypes)Myxofibrosarcoma	2.23502	0.545289	4.09879	4.15315e-05	0.0104228
FAT1	Colorectal Cancer	relevel(factor(race), ref = "Stage IV")Stage I	0.971859	0.238186	4.08025	4.49879e-05	0.0112013
SMAD2	Breast Cancer	factor(sample_all$sex)Male	2.91977	0.716206	4.07671	4.56764e-05	0.0112839
BARD1	Colorectal Cancer	relevel(factor(race), ref = "Stage IV")Stage I	1.45395	0.357821	4.06334	4.83764e-05	0.011767
LYN	Breast Cancer	factor(sample_all$sex)Male	3.25339	0.800345	4.06498	4.80356e-05	0.011767
PTEN	Colorectal Cancer	relevel(factor(race), ref = "Stage IV")Stage I	0.983095	0.242415	4.05542	5.0044e-05	0.0119882
NF2	Endometrial Cancer	factor(sample_subtypes)Uterine Serous Carcinoma/Uterine Papillary Serous Carcinoma	-3.96221	0.976899	-4.05591	4.99404e-05	0.0119882
SPEN	Head and Neck Cancer	relevel(factor(race), ref = "Stage IV")Stage I	3.00186	0.740707	4.0527	5.06297e-05	0.0120373
STAG2	Non-Small Cell Lung Cancer	factor(sample_all$sex)Male	-0.837733	0.207234	-4.04244	5.28976e-05	0.0124826
BCL2L1	Colorectal Cancer	relevel(factor(race), ref = "Stage IV")Stage II/III	3.32965	0.824062	4.04054	5.33282e-05	0.0124911
GRIN2A	Melanoma	factor(sample_all$sex)Male	0.63498	0.157475	4.03225	5.52464e-05	0.0128452
DNAJB1	Colorectal Cancer	relevel(factor(race), ref = "Stage IV")Stage II/III	2.6437	0.656152	4.0291	5.59907e-05	0.0129232
SMARCA4	Non-Small Cell Lung Cancer	relevel(factor(race), ref = "Stage IV")Stage I	-0.988697	0.245766	-4.02291	5.7483e-05	0.0131715
POLD1	Colorectal Cancer	relevel(factor(race), ref = "Stage IV")Stage II/III	1.85285	0.465041	3.98427	6.76887e-05	0.0153984
KEAP1	Non-Small Cell Lung Cancer	factor(sample_subtypes)Lung Adenocarcinoma	-0.930087	0.233593	-3.98166	6.84354e-05	0.0154571
NSD1	Endometrial Cancer	factor(sample_subtypes)Uterine Serous Carcinoma/Uterine Papillary Serous Carcinoma	-3.51214	0.884667	-3.97002	7.18662e-05	0.0161169
PTEN	Colorectal Cancer	factor(sample_subtypes)Rectal Adenocarcinoma	-0.860574	0.216924	-3.96717	7.27313e-05	0.016196
FBXW7	Colorectal Cancer	relevel(factor(race), ref = "Stage IV")Stage I	0.735722	0.185631	3.96335	7.3905e-05	0.0163423
KEAP1	Endometrial Cancer	factor(sample_subtypes)Uterine Serous Carcinoma/Uterine Papillary Serous Carcinoma	-3.506	0.88572	-3.95836	7.54651e-05	0.0165438
ERCC3	Colorectal Cancer	relevel(factor(race), ref = "Stage IV")Stage I	1.49151	0.376919	3.95711	7.58624e-05	0.0165438
IDH2	Colorectal Cancer	relevel(factor(race), ref = "Stage IV")Stage I	1.71299	0.433327	3.9531	7.71452e-05	0.0167083
RB1	Non-Small Cell Lung Cancer	factor(sample_subtypes)Lung Squamous Cell Carcinoma	-1.14613	0.291107	-3.93714	8.24584e-05	0.0176089
ATRX	Soft Tissue Sarcoma	factor(sample_subtypes)Undifferentiated Pleomorphic Sarcoma/Malignant Fibrous Histiocytoma/High-Grade Spindle Cell Sarcoma	1.97108	0.500557	3.93776	8.22442e-05	0.0176089
ERCC5	Colorectal Cancer	relevel(factor(race), ref = "Stage IV")Stage I	1.33173	0.338377	3.93564	8.29742e-05	0.0176089
SYK	Colorectal Cancer	relevel(factor(race), ref = "Stage IV")Stage I	1.57819	0.401192	3.93374	8.36356e-05	0.0176309
FGFR4	Colorectal Cancer	relevel(factor(race), ref = "Stage IV")Stage I	1.39969	0.356013	3.93157	8.43939e-05	0.017673
SMAD4	Hepatobiliary Cancer	factor(sample_subtypes)Hepatocellular Carcinoma	-2.30633	0.589169	-3.91455	9.05747e-05	0.0188425
APC	Non-Small Cell Lung Cancer	factor(sample_subtypes)Lung Squamous Cell Carcinoma	-1.64676	0.421185	-3.90982	9.23664e-05	0.0189657
KMT2A	Colorectal Cancer	relevel(factor(race), ref = "Stage IV")Stage I	1.01333	0.259108	3.91084	9.19752e-05	0.0189657
PTCH1	Colorectal Cancer	factor(sample_subtypes)Rectal Adenocarcinoma	-1.0705	0.274125	-3.90517	9.41605e-05	0.0192093
TCF7L2	Colorectal Cancer	relevel(factor(race), ref = "Stage IV")Stage II/III	1.34344	0.344199	3.9031	9.49666e-05	0.0192496
GLI1	Colorectal Cancer	relevel(factor(race), ref = "Stage IV")Stage II/III	1.80218	0.462335	3.898	9.69886e-05	0.0195343
MAP2K1	Colorectal Cancer	relevel(factor(race), ref = "Stage IV")Stage I	1.4667	0.377464	3.88566	0.00010205	0.0204236
KIT	Gastrointestinal Stromal Tumor	factor(aya_status)1	-1.25892	0.324339	-3.88148	0.000103821	0.0206474
TP53BP1	Colorectal Cancer	relevel(factor(race), ref = "Stage IV")Stage II/III	1.83081	0.473043	3.87027	0.000108715	0.021406
MDC1	Colorectal Cancer	relevel(factor(race), ref = "Stage IV")Stage I	1.252	0.323544	3.86965	0.00010899	0.021406
TMEM127	Colorectal Cancer	relevel(factor(race), ref = "Stage IV")Stage II/III	3.35254	0.871565	3.84658	0.000119778	0.0233796
PAK1	Colorectal Cancer	relevel(factor(race), ref = "Stage IV")Stage I	1.67274	0.435062	3.84484	0.000120631	0.0234017
NF2	Colorectal Cancer	relevel(factor(race), ref = "Stage IV")Stage I	1.54026	0.402167	3.82991	0.000128189	0.0245922
PMS2	Endometrial Cancer	factor(sample_subtypes)Uterine Serous Carcinoma/Uterine Papillary Serous Carcinoma	-4.61467	1.20498	-3.82965	0.000128323	0.0245922
BRAF	Thyroid Cancer	factor(aya_status)1	-1.23599	0.32352	-3.82043	0.000133217	0.0253763
FAT1	Endometrial Cancer	factor(sample_subtypes)Uterine Serous Carcinoma/Uterine Papillary Serous Carcinoma	-3.18364	0.835648	-3.80979	0.000139086	0.0258708
PIK3C2G	Melanoma	factor(sample_all$sex)Male	0.714993	0.187464	3.81403	0.000136719	0.0258708
PTPRD	Melanoma	factor(sample_all$sex)Male	0.621653	0.163157	3.81015	0.000138883	0.0258708
ARID5B	Endometrial Cancer	factor(sample_subtypes)Uterine Serous Carcinoma/Uterine Papillary Serous Carcinoma	-4.58896	1.20378	-3.81211	0.000137785	0.0258708
CD79A	Colorectal Cancer	relevel(factor(race), ref = "Stage IV")Stage I	1.63742	0.431345	3.79609	0.000146999	0.0271827
SMARCA4	Colorectal Cancer	relevel(factor(race), ref = "Stage IV")Stage II/III	1.61994	0.428385	3.7815	0.000155885	0.0286584
TP53	Breast Cancer	factor(sample_subtypes)Breast Invasive Lobular Carcinoma	-1.87647	0.496662	-3.77817	0.000157982	0.0287101
AR	Non-Small Cell Lung Cancer	factor(sample_all$sex)Male	-0.692188	0.183161	-3.77912	0.00015738	0.0287101
PMS2	Colorectal Cancer	relevel(factor(race), ref = "Stage IV")Stage I	1.50599	0.399129	3.77319	0.000161171	0.0291222
NCOR1	Colorectal Cancer	factor(sample_subtypes)Rectal Adenocarcinoma	-1.01042	0.267957	-3.77081	0.000162717	0.0292344
CASP8	Colorectal Cancer	factor(sample_subtypes)Rectal Adenocarcinoma	-1.10499	0.294091	-3.75729	0.000171764	0.0306856
SPEN	Endometrial Cancer	factor(sample_subtypes)Uterine Serous Carcinoma/Uterine Papillary Serous Carcinoma	-3.13892	0.835767	-3.75574	0.000172831	0.0307028
PTPRS	Colorectal Cancer	relevel(factor(race), ref = "Stage IV")Stage II/III	1.39279	0.371277	3.75134	0.000175889	0.0310714
SMARCA4	Colorectal Cancer	relevel(factor(race), ref = "Stage IV")Stage I	0.991219	0.264473	3.7479	0.000178324	0.0313265
KEAP1	Non-Small Cell Lung Cancer	relevel(factor(race), ref = "Stage IV")Stage I	-0.605859	0.161844	-3.74346	0.000181501	0.0315342
WHSC1	Breast Cancer	factor(sample_all$sex)Male	2.78824	0.74468	3.74421	0.000180963	0.0315342
GNAQ	Colorectal Cancer	relevel(factor(race), ref = "Stage IV")Stage I	1.96549	0.525802	3.73807	0.000185435	0.0320418
CCNE1	Colorectal Cancer	relevel(factor(race), ref = "Stage IV")others	2.5391	0.679774	3.73521	0.000187559	0.0322325
CDKN2A	Esophagogastric Cancer	factor(sample_subtypes)Stomach Adenocarcinoma	-1.47013	0.39404	-3.73091	0.00019079	0.0324407
SMAD4	Hepatobiliary Cancer	factor(sample_subtypes)Intrahepatic Cholangiocarcinoma	-1.41818	0.38012	-3.73087	0.000190821	0.0324407
CDH1	Breast Cancer	factor(sample_subtypes)Breast Invasive Ductal Carcinoma	-2.4568	0.658787	-3.72927	0.000192035	0.0324724
BRAF	Head and Neck Cancer	relevel(factor(race), ref = "Stage IV")Stage I	3.68718	0.989523	3.72622	0.000194369	0.0326923
NCOR1	Non-Small Cell Lung Cancer	factor(sample_subtypes)Lung Adenocarcinoma	-1.44219	0.38749	-3.72188	0.000197744	0.0329098
SPEN	Breast Cancer	factor(sample_subtypes)Breast Invasive Ductal Carcinoma	-2.21904	0.596068	-3.72279	0.000197031	0.0329098
KMT2D	Non-Small Cell Lung Cancer	factor(sample_all$sex)Male	0.398004	0.106979	3.7204	0.000198905	0.0329297
GRIN2A	Melanoma	factor(sample_subtypes)Cutaneous Melanoma	1.75306	0.471729	3.71624	0.000202207	0.033302
CIC	Endometrial Cancer	factor(sample_subtypes)Uterine Serous Carcinoma/Uterine Papillary Serous Carcinoma	-2.99234	0.806184	-3.71173	0.000205845	0.0337255
AKT1	Pancreatic Cancer	factor(sample_subtypes)Pancreatic Adenocarcinoma	-4.54214	1.22531	-3.70694	0.00020978	0.0341931
GRIN2A	Melanoma	factor(sample_subtypes)Melanoma of Unknown Primary	1.83381	0.494916	3.70529	0.000211146	0.0342392
POLD1	Colorectal Cancer	factor(sample_subtypes)Rectal Adenocarcinoma	-1.06061	0.286565	-3.70113	0.00021464	0.0346283
KMT2D	Non-Small Cell Lung Cancer	factor(sample_subtypes)Lung Adenocarcinoma	-1.07461	0.290814	-3.69518	0.000219729	0.0352692
EPHA7	Melanoma	factor(sample_all$sex)Male	0.714611	0.193851	3.68639	0.000227459	0.0363257
PTPRS	Colorectal Cancer	relevel(factor(race), ref = "Stage IV")Stage I	0.811924	0.220382	3.68417	0.000229453	0.03646
ROS1	Melanoma	factor(sample_subtypes)Melanoma of Unknown Primary	3.75653	1.02115	3.67872	0.000234405	0.0370537
MAP3K1	Breast Cancer	factor(aya_status)1	-1.68017	0.457036	-3.67623	0.000236705	0.0370537
RASA1	Colorectal Cancer	relevel(factor(race), ref = "Stage IV")Stage I	1.18529	0.322374	3.67676	0.000236214	0.0370537
RUNX1	Ovarian Cancer	relevel(factor(race), ref = "Stage IV")Stage II/III	4.75026	1.29398	3.67105	0.000241556	0.0376268
KRAS	Non-Small Cell Lung Cancer	relevel(factor(race), ref = "Stage IV")Stage I	0.349799	0.0954174	3.66599	0.000246382	0.0381905
ANKRD11	Colorectal Cancer	relevel(factor(race), ref = "Stage IV")Stage II/III	1.57839	0.431504	3.65787	0.000254317	0.039228
ZFHX3	Colorectal Cancer	factor(sample_subtypes)Rectal Adenocarcinoma	-0.66303	0.181535	-3.65236	0.000259841	0.0398855
CDKN2C	Non-Small Cell Lung Cancer	factor(sample_subtypes)Lung Adenocarcinoma	-2.41202	0.660828	-3.65	0.000262244	0.04006
POLD1	Colorectal Cancer	relevel(factor(race), ref = "Stage IV")Stage I	1.05533	0.289466	3.64577	0.000266591	0.0405283
MSH3	Endometrial Cancer	relevel(factor(race), ref = "Stage IV")Stage I	-1.50428	0.412965	-3.64262	0.000269874	0.0408311
SMARCA4	Endometrial Cancer	factor(sample_subtypes)Uterine Serous Carcinoma/Uterine Papillary Serous Carcinoma	-2.93337	0.805607	-3.64119	0.000271382	0.0408637
MSH6	Colorectal Cancer	factor(sample_subtypes)Rectal Adenocarcinoma	-1.03362	0.284179	-3.63723	0.00027559	0.0413007
TGFBR2	Head and Neck Cancer	factor(sample_all$sex)Male	-1.75807	0.484372	-3.62959	0.000283874	0.0423414
FGFR3	Head and Neck Cancer	relevel(factor(race), ref = "Stage IV")Stage I	3.7084	1.0235	3.62326	0.000290912	0.0431874
ALOX12B	Esophagogastric Cancer	relevel(factor(race), ref = "Stage IV")others	2.82043	0.780334	3.61438	0.000301062	0.0444854
DNMT1	Non-Small Cell Lung Cancer	factor(sample_subtypes)Lung Adenocarcinoma	-1.76507	0.488516	-3.61313	0.000302519	0.0444928
SF3B1	Melanoma	factor(sample_subtypes)Head and Neck Mucosal Melanoma	-3.74631	1.03829	-3.60814	0.000308395	0.045147
RB1	Soft Tissue Sarcoma	factor(sample_subtypes)Leiomyosarcoma	3.72796	1.03467	3.60305	0.000314499	0.0456182
FOXP1	Bladder Cancer	factor(sample_subtypes)Upper Tract Urothelial Carcinoma	1.09986	0.305208	3.60363	0.000313808	0.0456182
DDR2	Non-Small Cell Lung Cancer	factor(sample_subtypes)Lung Adenocarcinoma	-1.39153	0.386366	-3.60159	0.000316281	0.0456672
TP53	Endometrial Cancer	factor(sample_subtypes)Uterine Carcinosarcoma/Uterine Malignant Mixed Mullerian Tumor	2.23921	0.623136	3.59345	0.000326332	0.0467397
KEAP1	Endometrial Cancer	factor(sample_subtypes)Uterine Carcinosarcoma/Uterine Malignant Mixed Mullerian Tumor	-3.50035	0.975118	-3.58967	0.0003311	0.0467397
CIC	Endometrial Cancer	factor(sample_subtypes)Uterine Carcinosarcoma/Uterine Malignant Mixed Mullerian Tumor	-3.50137	0.974855	-3.59168	0.000328549	0.0467397
NSD1	Endometrial Cancer	factor(sample_subtypes)Uterine Carcinosarcoma/Uterine Malignant Mixed Mullerian Tumor	-3.50231	0.974712	-3.59317	0.000326676	0.0467397
XIAP	Colorectal Cancer	relevel(factor(race), ref = "Stage IV")Stage II/III	2.37098	0.660475	3.58981	0.000330922	0.0467397
TRAF7	Pancreatic Cancer	factor(sample_subtypes)Pancreatic Adenocarcinoma	-4.36422	1.21925	-3.57943	0.00034434	0.0483141
SDHAF2	Colorectal Cancer	relevel(factor(race), ref = "Stage IV")Stage II/III	3.04641	0.85126	3.5787	0.000345308	0.0483141
NOTCH1	Non-Small Cell Lung Cancer	factor(sample_subtypes)Lung Adenocarcinoma	-1.37819	0.385409	-3.57593	0.000348991	0.0486143
AMER1	Melanoma	factor(sample_all$sex)Male	-0.902589	0.252792	-3.57047	0.000356335	0.0494196
ELF3	Esophagogastric Cancer	relevel(factor(race), ref = "Stage IV")Stage II/III	2.77313	0.777177	3.56821	0.000359424	0.0495733
MST1	Colorectal Cancer	relevel(factor(race), ref = "Stage IV")Stage II/III	3.04556	0.853728	3.56737	0.000360579	0.0495733
KMT2D	Melanoma	factor(sample_subtypes)Melanoma of Unknown Primary	2.19663	0.616891	3.56082	0.000369703	0.0506077
ZFHX3	Non-Small Cell Lung Cancer	relevel(factor(race), ref = "Stage IV")Stage I	-1.29176	0.36292	-3.55937	0.000371752	0.0506688
ZRSR2	Colorectal Cancer	relevel(factor(race), ref = "Stage IV")Stage II/III	2.28692	0.642891	3.55725	0.000374761	0.0508241
PREX2	Non-Small Cell Lung Cancer	factor(sample_subtypes)Lung Adenocarcinoma	-1.40516	0.395117	-3.55631	0.000376106	0.0508241
SMARCA4	Endometrial Cancer	factor(sample_subtypes)Uterine Carcinosarcoma/Uterine Malignant Mixed Mullerian Tumor	-3.46327	0.974603	-3.55352	0.000380109	0.0511465
KEAP1	Colorectal Cancer	relevel(factor(race), ref = "Stage IV")Stage II/III	1.96579	0.554227	3.5469	0.000389786	0.0522264
DIS3	Colorectal Cancer	relevel(factor(race), ref = "Stage IV")Stage I	1.31704	0.371725	3.54304	0.000395542	0.0525523
TCF3	Colorectal Cancer	relevel(factor(race), ref = "Stage IV")Stage I	1.25116	0.353043	3.54392	0.000394221	0.0525523
MSH2	Colorectal Cancer	relevel(factor(race), ref = "Stage IV")Stage II/III	1.76301	0.497926	3.54071	0.000399058	0.0527975
IGF2	Colorectal Cancer	relevel(factor(race), ref = "Stage IV")Stage II/III	2.2956	0.648591	3.53937	0.000401083	0.0528443
KMT2D	Colorectal Cancer	relevel(factor(race), ref = "Stage IV")Stage II/III	1.31803	0.372669	3.53672	0.000405128	0.0531558
SMO	Non-Small Cell Lung Cancer	factor(sample_subtypes)Lung Adenocarcinoma	-1.45463	0.411856	-3.53188	0.000412618	0.0536919
NF2	Endometrial Cancer	factor(sample_subtypes)Uterine Carcinosarcoma/Uterine Malignant Mixed Mullerian Tumor	-3.12837	0.886296	-3.52972	0.000416006	0.0536919
PTPRD	Melanoma	factor(sample_subtypes)Melanoma of Unknown Primary	3.60666	1.0211	3.53212	0.000412235	0.0536919
MGA	Head and Neck Cancer	relevel(factor(race), ref = "Stage IV")Stage I	2.74949	0.778774	3.53053	0.000414725	0.0536919
JAK1	Hepatobiliary Cancer	relevel(factor(race), ref = "Stage IV")others	2.17156	0.615596	3.52758	0.000419377	0.0539069
MTOR	Renal Cell Carcinoma	factor(sample_all$sex)Male	-1.18131	0.335179	-3.52441	0.000424435	0.0543363
MSH6	Ovarian Cancer	relevel(factor(race), ref = "Stage IV")Stage II/III	4.43365	1.25993	3.51898	0.000433211	0.0552083
NUP93	Colorectal Cancer	relevel(factor(race), ref = "Stage IV")Stage II/III	1.97331	0.561081	3.51698	0.000436484	0.0552083
MST1R	Colorectal Cancer	factor(sample_subtypes)Rectal Adenocarcinoma	-1.34072	0.381194	-3.51716	0.000436194	0.0552083
XRCC2	Colorectal Cancer	relevel(factor(race), ref = "Stage IV")Stage I	1.63435	0.465031	3.51449	0.000440603	0.0555072
MRE11A	Colorectal Cancer	relevel(factor(race), ref = "Stage IV")Stage I	1.30525	0.371696	3.51159	0.000445435	0.0558933
KMT2D	Endometrial Cancer	relevel(factor(race), ref = "Stage IV")Stage I	-0.674712	0.192263	-3.50932	0.000449249	0.056149
PPM1D	Breast Cancer	factor(sample_all$sex)Male	2.38167	0.67908	3.5072	0.000452853	0.0563766
BCOR	Colorectal Cancer	factor(sample_subtypes)Rectal Adenocarcinoma	-0.951081	0.27146	-3.50358	0.000459051	0.0569241
PTEN	Ovarian Cancer	factor(sample_subtypes)High-Grade Serous Ovarian Cancer	-1.8619	0.532678	-3.49535	0.00047344	0.0584791
STAG2	Colorectal Cancer	relevel(factor(race), ref = "Stage IV")Stage I	1.29643	0.371208	3.49247	0.000478583	0.0585888
PMS2	Endometrial Cancer	factor(sample_subtypes)Uterine Carcinosarcoma/Uterine Malignant Mixed Mullerian Tumor	-4.20632	1.20465	-3.49174	0.000479887	0.0585888
HLA-A	Pancreatic Cancer	relevel(factor(race), ref = "Stage IV")Stage I	2.44618	0.70053	3.49189	0.000479614	0.0585888
TP53	Breast Cancer	factor(sample_all$sex)Male	-2.11335	0.606031	-3.4872	0.000488113	0.0589649
CREBBP	Colorectal Cancer	factor(sample_subtypes)Rectal Adenocarcinoma	-0.732201	0.210045	-3.48593	0.000490426	0.0589649
RUNX1	Colorectal Cancer	relevel(factor(race), ref = "Stage IV")Stage I	1.37892	0.395378	3.4876	0.000487376	0.0589649
ARID5B	Endometrial Cancer	factor(sample_subtypes)Uterine Carcinosarcoma/Uterine Malignant Mixed Mullerian Tumor	-4.19807	1.20419	-3.48621	0.000489913	0.0589649
BLM	Non-Small Cell Lung Cancer	factor(sample_all$sex)Male	0.96594	0.277469	3.48125	0.000499073	0.0597772
CRKL	Colorectal Cancer	relevel(factor(race), ref = "Stage IV")Stage I	2.06392	0.594092	3.47408	0.000512607	0.0610227
AMER1	Non-Small Cell Lung Cancer	factor(sample_all$sex)Male	-0.579301	0.166768	-3.4737	0.000513331	0.0610227
NTRK3	Colorectal Cancer	relevel(factor(race), ref = "Stage IV")Stage II/III	1.71757	0.495138	3.46888	0.00052263	0.0614353
XPO1	Colorectal Cancer	relevel(factor(race), ref = "Stage IV")Stage I	1.46956	0.423571	3.46945	0.000521521	0.0614353
ATR	Colorectal Cancer	relevel(factor(race), ref = "Stage IV")Stage I	1.03698	0.298771	3.47081	0.000518895	0.0614353
ELF3	Ovarian Cancer	factor(sample_subtypes)High-Grade Serous Ovarian Cancer	-2.70208	0.779962	-3.46437	0.000531466	0.0622425
MEN1	Pancreatic Cancer	factor(aya_status)1	-1.94136	0.560923	-3.46102	0.000538138	0.0627914
CTCF	Endometrial Cancer	factor(sample_subtypes)Uterine Carcinosarcoma/Uterine Malignant Mixed Mullerian Tumor	-4.16549	1.20402	-3.45965	0.000540878	0.0628791
JAK1	Endometrial Cancer	factor(sample_subtypes)Uterine Carcinosarcoma/Uterine Malignant Mixed Mullerian Tumor	-4.16299	1.20404	-3.45751	0.000545188	0.063148
MAP2K2	Colorectal Cancer	relevel(factor(race), ref = "Stage IV")Stage I	1.60489	0.464736	3.45334	0.000553691	0.0638988
NF2	Endometrial Cancer	factor(sample_subtypes)Uterine Endometrioid Carcinoma	-2.48292	0.719488	-3.45095	0.000558618	0.0642329
SPEN	Endometrial Cancer	factor(sample_subtypes)Uterine Carcinosarcoma/Uterine Malignant Mixed Mullerian Tumor	-3.04686	0.884955	-3.44295	0.000575403	0.0659233
STAG2	Bladder Cancer	relevel(factor(race), ref = "Stage IV")Stage I	0.725865	0.210988	3.44031	0.000581049	0.0663298
RBM10	Melanoma	factor(sample_all$sex)Male	-1.36427	0.396876	-3.43753	0.000587045	0.0667732
NF1	Melanoma	factor(sample_subtypes)Uveal Melanoma	-3.57167	1.03981	-3.43492	0.000592734	0.0671786
ARID1B	Ovarian Cancer	factor(sample_subtypes)High-Grade Serous Ovarian Cancer	-1.64351	0.478885	-3.43195	0.000599254	0.0674342
KDM5A	Breast Cancer	factor(sample_subtypes)Breast Invasive Ductal Carcinoma	-2.73125	0.795627	-3.43283	0.000597326	0.0674342
JAK1	Colorectal Cancer	relevel(factor(race), ref = "Stage IV")Stage I	1.14779	0.334861	3.42767	0.000608786	0.0682639
CDH1	Esophagogastric Cancer	relevel(factor(race), ref = "Stage IV")others	1.61177	0.470451	3.42602	0.000612496	0.0684372
CIC	Colorectal Cancer	factor(sample_subtypes)Rectal Adenocarcinoma	-0.85651	0.250155	-3.42392	0.000617258	0.0687264
ARID1A	Non-Small Cell Lung Cancer	relevel(factor(race), ref = "Stage IV")Stage I	-0.89177	0.26062	-3.42172	0.000622255	0.0690397
STK40	Non-Small Cell Lung Cancer	factor(sample_subtypes)Lung Adenocarcinoma	-2.21582	0.648039	-3.41927	0.00062789	0.0694213
ARID1B	Bladder Cancer	relevel(factor(race), ref = "Stage IV")Stage I	0.846276	0.247913	3.4136	0.0006411	0.0699042
GRIN2A	Pancreatic Cancer	relevel(factor(race), ref = "Stage IV")Stage II/III	4.47238	1.30937	3.41566	0.000636268	0.0699042
KMT2B	Colorectal Cancer	relevel(factor(race), ref = "Stage IV")Stage I	0.808009	0.236628	3.41469	0.000638553	0.0699042
TGFBR1	Colorectal Cancer	factor(aya_status)1	1.00613	0.294731	3.41374	0.000640776	0.0699042
PTEN	Non-Small Cell Lung Cancer	factor(sample_subtypes)Lung Adenocarcinoma	-1.31069	0.384478	-3.40902	0.000651962	0.0708443
SH2B3	Bladder Cancer	factor(sample_subtypes)Upper Tract Urothelial Carcinoma	1.56907	0.460427	3.40785	0.000654769	0.0709056
FLCN	Colorectal Cancer	relevel(factor(race), ref = "Stage IV")Stage I	1.08998	0.319989	3.4063	0.000658496	0.0710659
FOXO1	Colorectal Cancer	relevel(factor(race), ref = "Stage IV")Stage II/III	2.17585	0.641439	3.39215	0.000693476	0.0745864
TP53	Melanoma	factor(sample_subtypes)Melanoma of Unknown Primary	1.28323	0.378608	3.38933	0.000700635	0.0748194
ATR	Colorectal Cancer	factor(aya_status)1	0.78539	0.231728	3.38927	0.000700783	0.0748194
TERT	Pancreatic Cancer	factor(sample_subtypes)Pancreatic Adenocarcinoma	-4.06486	1.19966	-3.38836	0.000703127	0.0748194
RXRA	Colorectal Cancer	relevel(factor(race), ref = "Stage IV")Stage II/III	2.22294	0.656202	3.38759	0.000705107	0.0748194
TMPRSS2	Colorectal Cancer	relevel(factor(race), ref = "Stage IV")Stage I	1.73394	0.512012	3.38652	0.000707843	0.0748586
IRS1	Ovarian Cancer	relevel(factor(race), ref = "Stage IV")others	2.53085	0.747627	3.38518	0.000711316	0.074975
KRAS	Hepatobiliary Cancer	factor(sample_subtypes)Gallbladder Adenocarcinoma, NOS	-1.92099	0.569018	-3.37598	0.000735537	0.0767605
MYD88	Colorectal Cancer	relevel(factor(race), ref = "Stage IV")others	2.08332	0.617022	3.37642	0.000734355	0.0767605
TMEM127	Breast Cancer	factor(sample_all$sex)Male	3.19847	0.947294	3.37643	0.000734338	0.0767605
BRAF	Melanoma	factor(sample_subtypes)others	2.51813	0.746793	3.37193	0.000746435	0.0772613
STAG2	Bladder Cancer	relevel(factor(race), ref = "Stage IV")others	1.02998	0.305498	3.37148	0.000747666	0.0772613
AXIN2	Head and Neck Cancer	relevel(factor(race), ref = "Stage IV")Stage I	3.31326	0.982277	3.37304	0.000743424	0.0772613
EGFR	Colorectal Cancer	relevel(factor(race), ref = "Stage IV")Stage I	1.17899	0.350238	3.36626	0.00076195	0.0777365
EPHA5	Non-Small Cell Lung Cancer	factor(sample_subtypes)Lung Adenocarcinoma	-1.03795	0.308313	-3.36656	0.000761127	0.0777365
NSD1	Head and Neck Cancer	factor(sample_subtypes)Larynx Squamous Cell Carcinoma	2.17147	0.64525	3.36532	0.000764557	0.0777365
TMPRSS2	Breast Cancer	factor(sample_subtypes)Breast Invasive Ductal Carcinoma	-3.08073	0.9152	-3.36618	0.000762178	0.0777365
LATS1	Breast Cancer	factor(sample_all$sex)Male	2.36152	0.701571	3.36605	0.000762539	0.0777365
CDKN2A	Colorectal Cancer	relevel(factor(race), ref = "Stage IV")Stage I	1.32391	0.394053	3.35973	0.000780188	0.0788667
FAT1	Non-Small Cell Lung Cancer	factor(sample_subtypes)Lung Adenocarcinoma	-0.972532	0.28955	-3.35877	0.000782908	0.0788667
PTPRD	Head and Neck Cancer	relevel(factor(race), ref = "Stage IV")Stage I	2.48077	0.738615	3.35868	0.000783155	0.0788667
MAP3K1	Colorectal Cancer	relevel(factor(race), ref = "Stage IV")Stage II/III	1.66159	0.495527	3.35317	0.000798924	0.0801993
EED	Colorectal Cancer	relevel(factor(race), ref = "Stage IV")Stage II/III	2.66311	0.79486	3.35042	0.000806901	0.0805311
MSH3	Colorectal Cancer	relevel(factor(race), ref = "Stage IV")Stage I	0.927128	0.276732	3.35027	0.000807323	0.0805311
NF1	Breast Cancer	relevel(factor(race), ref = "Stage IV")Stage I	-1.23278	0.368988	-3.34097	0.000834862	0.0818208
BRCA2	Colorectal Cancer	relevel(factor(race), ref = "Stage IV")Stage II/III	1.42573	0.42678	3.34067	0.000835777	0.0818208
CREBBP	Bladder Cancer	relevel(factor(race), ref = "Stage IV")Stage I	0.62445	0.186909	3.34093	0.000834985	0.0818208
CARD11	Breast Cancer	factor(aya_status)1	1.22349	0.365914	3.34366	0.000826798	0.0818208
MGA	Colorectal Cancer	relevel(factor(race), ref = "Stage IV")Stage I	0.884468	0.264416	3.34499	0.000822861	0.0818208
INPPL1	Endometrial Cancer	relevel(factor(race), ref = "Stage IV")Stage I	-0.795167	0.237892	-3.34255	0.000830134	0.0818208
PIK3R1	Pancreatic Cancer	relevel(factor(race), ref = "Stage IV")Stage I	2.27246	0.680758	3.33814	0.000843426	0.0823148
SDHA	Gastrointestinal Stromal Tumor	factor(aya_status)1	2.1557	0.646027	3.33685	0.000847328	0.0824411
TBX3	Melanoma	factor(sample_all$sex)Male	1.22243	0.367158	3.32944	0.000870212	0.0841497
PIK3C3	Breast Cancer	factor(sample_all$sex)Male	3.01169	0.904424	3.32996	0.000868596	0.0841497
CDKN2A	Head and Neck Cancer	factor(sample_all$sex)Male	-0.930386	0.280176	-3.32072	0.000897844	0.0862845
CTNNB1	Ovarian Cancer	factor(sample_subtypes)High-Grade Serous Ovarian Cancer	-2.16886	0.653787	-3.31738	0.00090866	0.0862845
FBXW7	Colorectal Cancer	factor(sample_subtypes)Rectal Adenocarcinoma	0.372648	0.11231	3.31802	0.000906579	0.0862845
SMARCA4	Ovarian Cancer	factor(sample_subtypes)High-Grade Serous Ovarian Cancer	-2.17222	0.654504	-3.31888	0.000903788	0.0862845
IGF2	Non-Small Cell Lung Cancer	factor(sample_subtypes)Lung Adenocarcinoma	-1.81705	0.547074	-3.32141	0.000895654	0.0862845
MGA	Colorectal Cancer	factor(sample_subtypes)Rectal Adenocarcinoma	-0.751272	0.226455	-3.31754	0.000908142	0.0862845
MST1R	Colorectal Cancer	relevel(factor(race), ref = "Stage IV")Stage I	1.11118	0.33536	3.31341	0.000921671	0.087258
STAT5A	Colorectal Cancer	relevel(factor(race), ref = "Stage IV")Stage I	1.40713	0.42487	3.31191	0.000926627	0.0874653
AXIN2	Non-Small Cell Lung Cancer	factor(sample_subtypes)Lung Squamous Cell Carcinoma	-1.81193	0.548853	-3.3013	0.000962396	0.0905712
FLT4	Non-Small Cell Lung Cancer	factor(sample_subtypes)Lung Adenocarcinoma	-1.26782	0.384864	-3.2942	0.000987019	0.0926128
ARAF	Non-Small Cell Lung Cancer	factor(sample_all$sex)Male	-0.867697	0.263477	-3.29326	0.000990333	0.0926488
PTEN	Endometrial Cancer	relevel(factor(race), ref = "Stage IV")Stage I	0.600211	0.182467	3.28943	0.0010039	0.09282
CDH1	Esophagogastric Cancer	factor(sample_subtypes)Stomach Adenocarcinoma	1.6399	0.498272	3.29118	0.000997694	0.09282
MCL1	Breast Cancer	factor(sample_all$sex)Male	2.99227	0.909211	3.29106	0.00099811	0.09282
GLI1	Pancreatic Cancer	factor(sample_subtypes)Pancreatic Adenocarcinoma	-4.14004	1.25836	-3.29003	0.00100177	0.09282
IGF1R	Colorectal Cancer	factor(sample_subtypes)Rectal Adenocarcinoma	-1.17829	0.358301	-3.28855	0.00100704	0.0928382
MITF	Colorectal Cancer	relevel(factor(race), ref = "Stage IV")Stage II/III	1.80176	0.548311	3.28603	0.00101612	0.093403
BRAF	Ovarian Cancer	factor(sample_subtypes)High-Grade Serous Ovarian Cancer	-1.98576	0.605172	-3.28131	0.00103326	0.0941579
MLH1	Colorectal Cancer	factor(sample_subtypes)Rectal Adenocarcinoma	-1.4225	0.433377	-3.28236	0.00102942	0.0941579
CBFB	Breast Cancer	relevel(factor(race), ref = "Stage IV")Stage II/III	0.935203	0.284952	3.28197	0.00103085	0.0941579
KRAS	Endometrial Cancer	factor(sample_subtypes)Uterine Carcinosarcoma/Uterine Malignant Mixed Mullerian Tumor	-2.02786	0.618652	-3.27787	0.00104593	0.0947659
FGFR2	Ovarian Cancer	factor(sample_subtypes)High-Grade Serous Ovarian Cancer	-2.04835	0.624769	-3.27856	0.00104337	0.0947659
ANKRD11	Colorectal Cancer	factor(sample_subtypes)Rectal Adenocarcinoma	-0.713323	0.217706	-3.27654	0.00105087	0.0949414
KMT2D	Bladder Cancer	factor(sample_subtypes)Upper Tract Urothelial Carcinoma	0.504506	0.154216	3.27141	0.00107011	0.0961306
PPP2R1A	Colorectal Cancer	relevel(factor(race), ref = "Stage IV")Stage I	1.20764	0.369071	3.27209	0.00106754	0.0961306
TGFBR1	Melanoma	factor(aya_status)1	1.88841	0.577402	3.27054	0.00107344	0.0961562
TP53	Bladder Cancer	factor(sample_subtypes)Upper Tract Urothelial Carcinoma	-0.498739	0.152635	-3.26752	0.00108494	0.0964754
RB1	Soft Tissue Sarcoma	factor(sample_subtypes)Undifferentiated Pleomorphic Sarcoma/Malignant Fibrous Histiocytoma/High-Grade Spindle Cell Sarcoma	3.37213	1.03162	3.26878	0.00108014	0.0964754
ERCC2	Bladder Cancer	relevel(factor(race), ref = "Stage IV")Stage I	0.706995	0.216391	3.2672	0.00108615	0.0964754
KRAS	Pancreatic Cancer	factor(sample_subtypes)Pancreatic Neuroendocrine Tumor	-3.89501	1.19354	-3.2634	0.00110082	0.0970735
GRIN2A	Colorectal Cancer	factor(sample_subtypes)Rectal Adenocarcinoma	-0.694321	0.212781	-3.26308	0.0011021	0.0970735
KMT2B	Endometrial Cancer	factor(sample_subtypes)Uterine Serous Carcinoma/Uterine Papillary Serous Carcinoma	-2.56246	0.784977	-3.26437	0.00109708	0.0970735
PDGFRA	Non-Small Cell Lung Cancer	factor(sample_subtypes)Lung Adenocarcinoma	-1.13189	0.347095	-3.26105	0.00111001	0.0973468
GATA3	Melanoma	factor(sample_all$sex)Male	1.56519	0.480226	3.25927	0.00111699	0.0973468
FUBP1	Endometrial Cancer	factor(sample_subtypes)Uterine Serous Carcinoma/Uterine Papillary Serous Carcinoma	-3.4301	1.05246	-3.25914	0.00111751	0.0973468
PRKCI	Colorectal Cancer	relevel(factor(race), ref = "Stage IV")Stage I	1.39939	0.42932	3.25956	0.00111586	0.0973468
CSF1R	Melanoma	factor(sample_all$sex)Male	1.05779	0.324908	3.25566	0.00113128	0.0978882
CTCF	Bladder Cancer	factor(sample_subtypes)Upper Tract Urothelial Carcinoma	1.0795	0.331778	3.25368	0.00113921	0.0978882
TGFBR2	Endometrial Cancer	factor(sample_subtypes)Uterine Serous Carcinoma/Uterine Papillary Serous Carcinoma	-4.12841	1.2686	-3.2543	0.00113673	0.0978882
TET1	Endometrial Cancer	factor(sample_subtypes)Uterine Serous Carcinoma/Uterine Papillary Serous Carcinoma	-4.12485	1.26727	-3.25492	0.00113424	0.0978882
TP63	Endometrial Cancer	factor(sample_subtypes)Uterine Serous Carcinoma/Uterine Papillary Serous Carcinoma	-4.12603	1.26794	-3.25411	0.00113749	0.0978882
PIK3CD	Non-Small Cell Lung Cancer	factor(sample_subtypes)Lung Adenocarcinoma	-1.76477	0.542668	-3.25202	0.00114586	0.0981935
CDC73	Non-Small Cell Lung Cancer	factor(sample_subtypes)Lung Adenocarcinoma	-1.76078	0.541903	-3.24925	0.00115711	0.0987199
PTCH1	Melanoma	factor(sample_all$sex)Male	1.2703	0.390987	3.24897	0.00115825	0.0987199
RBM10	Non-Small Cell Lung Cancer	relevel(factor(race), ref = "Stage IV")Stage I	0.419278	0.129125	3.24707	0.00116598	0.0991113
TOP1	Non-Small Cell Lung Cancer	factor(sample_subtypes)Lung Adenocarcinoma	-1.77073	0.546078	-3.24263	0.0011843	0.10013
PIK3CB	Endometrial Cancer	factor(sample_subtypes)Uterine Serous Carcinoma/Uterine Papillary Serous Carcinoma	-4.11012	1.26739	-3.24297	0.00118291	0.10013
TP53	Non-Small Cell Lung Cancer	factor(sample_subtypes)Lung Squamous Cell Carcinoma	0.859155	0.265095	3.24094	0.00119136	0.1004
TBX3	Colorectal Cancer	relevel(factor(race), ref = "Stage IV")Stage II/III	1.60005	0.49379	3.24035	0.00119383	0.1004
POLD1	Endometrial Cancer	factor(sample_subtypes)Uterine Serous Carcinoma/Uterine Papillary Serous Carcinoma	-4.10669	1.26781	-3.2392	0.00119865	0.100537
XIAP	Non-Small Cell Lung Cancer	factor(sample_all$sex)Male	-3.28458	1.01466	-3.23714	0.00120735	0.100999
ERCC5	Colorectal Cancer	factor(sample_subtypes)Rectal Adenocarcinoma	-1.31863	0.407524	-3.23573	0.00121334	0.101232
ARID2	Melanoma	factor(sample_subtypes)Melanoma of Unknown Primary	2.41106	0.745399	3.23459	0.00121817	0.101368
ROS1	Melanoma	factor(sample_subtypes)Cutaneous Melanoma	3.26876	1.01101	3.23317	0.00122426	0.101607
BRAF	Ovarian Cancer	relevel(factor(race), ref = "Stage IV")Stage II/III	3.92884	1.21719	3.22779	0.0012475	0.101681
KDR	Endometrial Cancer	factor(sample_subtypes)Uterine Serous Carcinoma/Uterine Papillary Serous Carcinoma	-3.39361	1.05156	-3.2272	0.00125006	0.101681
NTRK1	Endometrial Cancer	factor(sample_subtypes)Uterine Serous Carcinoma/Uterine Papillary Serous Carcinoma	-4.09287	1.26725	-3.22973	0.00123909	0.101681
CIC	Head and Neck Cancer	relevel(factor(race), ref = "Stage IV")Stage I	2.94836	0.913104	3.22894	0.00124251	0.101681
RNF43	Endometrial Cancer	factor(sample_subtypes)Uterine Serous Carcinoma/Uterine Papillary Serous Carcinoma	-3.39593	1.05103	-3.23104	0.0012334	0.101681
TSHR	Colorectal Cancer	relevel(factor(race), ref = "Stage IV")Stage II/III	1.76885	0.548139	3.22702	0.00125088	0.101681
PLK2	Endometrial Cancer	factor(sample_subtypes)Uterine Serous Carcinoma/Uterine Papillary Serous Carcinoma	-4.09269	1.26793	-3.22785	0.00124725	0.101681
YES1	Endometrial Cancer	factor(sample_subtypes)Uterine Serous Carcinoma/Uterine Papillary Serous Carcinoma	-3.39858	1.05277	-3.22821	0.00124566	0.101681
CDH1	Colorectal Cancer	relevel(factor(race), ref = "Stage IV")Stage I	1.19104	0.369317	3.22497	0.00125985	0.101887
PAK1	Bladder Cancer	relevel(factor(race), ref = "Stage IV")Stage II/III	2.77642	0.860839	3.22525	0.00125864	0.101887
GNAS	Non-Small Cell Lung Cancer	relevel(factor(race), ref = "Stage IV")others	1.55058	0.481182	3.22245	0.001271	0.102526
PIK3CA	Breast Cancer	relevel(factor(race), ref = "Stage IV")Stage I	0.323073	0.100301	3.22103	0.00127731	0.102773
KDM5C	Endometrial Cancer	factor(sample_subtypes)Uterine Serous Carcinoma/Uterine Papillary Serous Carcinoma	-3.38355	1.05117	-3.21885	0.00128704	0.103032
GATA2	Colorectal Cancer	relevel(factor(race), ref = "Stage IV")Stage II/III	2.02623	0.629472	3.21894	0.00128664	0.103032
ATM	Colorectal Cancer	factor(sample_subtypes)Rectal Adenocarcinoma	-0.561886	0.17493	-3.21207	0.00131782	0.104258
IGF1R	Endometrial Cancer	factor(sample_subtypes)Uterine Serous Carcinoma/Uterine Papillary Serous Carcinoma	-4.07103	1.26727	-3.21243	0.00131617	0.104258
BRD4	Ovarian Cancer	relevel(factor(race), ref = "Stage IV")others	2.24789	0.699714	3.21259	0.00131544	0.104258
IRS1	Colorectal Cancer	relevel(factor(race), ref = "Stage IV")Stage I	0.950961	0.296079	3.21185	0.00131885	0.104258
PTPRS	Colorectal Cancer	factor(sample_subtypes)Rectal Adenocarcinoma	-0.52348	0.162939	-3.21274	0.00131475	0.104258
NCOR1	Colorectal Cancer	relevel(factor(race), ref = "Stage IV")Stage I	0.919501	0.286633	3.20793	0.00133692	0.105161
RRAGC	Non-Small Cell Lung Cancer	relevel(factor(race), ref = "Stage IV")Stage II/III	2.59627	0.809217	3.20837	0.00133488	0.105161
POLE	Colorectal Cancer	factor(sample_subtypes)Rectal Adenocarcinoma	-0.722496	0.225284	-3.20705	0.00134103	0.105204
TRAF7	Melanoma	relevel(factor(race), ref = "Stage IV")others	1.9378	0.604356	3.20639	0.00134412	0.105204
FGFR2	Ovarian Cancer	relevel(factor(race), ref = "Stage IV")Stage II/III	3.8995	1.21664	3.20514	0.00134996	0.105382
KDM5C	Renal Cell Carcinoma	factor(sample_all$sex)Male	2.33864	0.729803	3.20448	0.00135306	0.105382
PTPRD	Melanoma	factor(sample_subtypes)Cutaneous Melanoma	3.23828	1.01082	3.2036	0.00135721	0.105446
TP53	Endometrial Cancer	relevel(factor(race), ref = "Stage IV")others	-0.99941	0.312163	-3.20156	0.00136684	0.105933
SYK	Non-Small Cell Lung Cancer	factor(sample_subtypes)Lung Adenocarcinoma	-2.0267	0.633308	-3.20018	0.00137342	0.106184
HIST1H3G	Breast Cancer	factor(sample_subtypes)Breast Invasive Ductal Carcinoma	-3.84496	1.20274	-3.19683	0.00138948	0.107163
RICTOR	Endometrial Cancer	factor(sample_subtypes)Uterine Serous Carcinoma/Uterine Papillary Serous Carcinoma	-3.35782	1.05125	-3.19413	0.00140252	0.107839
MST1R	Endometrial Cancer	factor(sample_subtypes)Uterine Serous Carcinoma/Uterine Papillary Serous Carcinoma	-4.04892	1.26782	-3.19361	0.00140507	0.107839
DIS3	Hepatobiliary Cancer	relevel(factor(race), ref = "Stage IV")Stage II/III	3.08938	0.967801	3.19217	0.0014121	0.108116
STK11	Endometrial Cancer	factor(sample_subtypes)Uterine Serous Carcinoma/Uterine Papillary Serous Carcinoma	-4.04179	1.26725	-3.18941	0.00142563	0.108593
BRCA1	Endometrial Cancer	factor(sample_subtypes)Uterine Serous Carcinoma/Uterine Papillary Serous Carcinoma	-3.34979	1.05117	-3.18672	0.00143894	0.108593
STAG2	Hepatobiliary Cancer	relevel(factor(race), ref = "Stage IV")Stage I	3.41674	1.07209	3.18699	0.0014376	0.108593
FANCA	Colorectal Cancer	relevel(factor(race), ref = "Stage IV")others	1.35896	0.42611	3.18922	0.0014266	0.108593
KMT2B	Endometrial Cancer	factor(sample_subtypes)Uterine Carcinosarcoma/Uterine Malignant Mixed Mullerian Tumor	-2.82369	0.885736	-3.18796	0.00143281	0.108593
BIRC3	Non-Small Cell Lung Cancer	factor(sample_subtypes)Lung Squamous Cell Carcinoma	-1.88867	0.592342	-3.18847	0.00143026	0.108593
PIK3R3	Endometrial Cancer	factor(sample_subtypes)Uterine Serous Carcinoma/Uterine Papillary Serous Carcinoma	-4.03876	1.26806	-3.18498	0.00144763	0.108989
RASA1	Colorectal Cancer	factor(sample_subtypes)Rectal Adenocarcinoma	-1.10821	0.348246	-3.18225	0.00146137	0.109762
ARID2	Endometrial Cancer	factor(sample_subtypes)Uterine Serous Carcinoma/Uterine Papillary Serous Carcinoma	-4.02768	1.2667	-3.17967	0.00147442	0.110156
ARID1B	Endometrial Cancer	factor(sample_subtypes)Uterine Serous Carcinoma/Uterine Papillary Serous Carcinoma	-3.34169	1.05069	-3.18048	0.00147031	0.110156
PREX2	Colorectal Cancer	factor(sample_subtypes)Rectal Adenocarcinoma	-0.875866	0.275503	-3.17915	0.00147706	0.110156
SMARCA4	Colorectal Cancer	factor(sample_subtypes)Rectal Adenocarcinoma	-0.717835	0.225979	-3.17656	0.00149033	0.110624
HLA-A	Colorectal Cancer	factor(sample_subtypes)Rectal Adenocarcinoma	-1.39419	0.438869	-3.17677	0.00148924	0.110624
MSH2	Bladder Cancer	factor(sample_subtypes)Upper Tract Urothelial Carcinoma	1.0795	0.340017	3.17483	0.00149924	0.110814
TCF3	Colorectal Cancer	factor(sample_subtypes)Rectal Adenocarcinoma	-1.38719	0.43695	-3.1747	0.0014999	0.110814
FAM175A	Colorectal Cancer	relevel(factor(race), ref = "Stage IV")Stage I	1.60876	0.506978	3.17323	0.00150752	0.111118
FANCA	Head and Neck Cancer	relevel(factor(race), ref = "Stage IV")Stage I	3.28924	1.03696	3.17201	0.00151389	0.111327
ABL1	Ovarian Cancer	relevel(factor(race), ref = "Stage IV")Stage II/III	3.8519	1.21579	3.16822	0.00153373	0.111857
KDR	Non-Small Cell Lung Cancer	factor(sample_subtypes)Lung Adenocarcinoma	-1.14789	0.362345	-3.16794	0.00153524	0.111857
SUFU	Colorectal Cancer	relevel(factor(race), ref = "Stage IV")Stage II/III	2.03051	0.640874	3.16835	0.00153309	0.111857
EPHB1	Colorectal Cancer	relevel(factor(race), ref = "Stage IV")Stage II/III	1.45321	0.45847	3.16971	0.00152593	0.111857
SF3B1	Endometrial Cancer	factor(sample_subtypes)Uterine Serous Carcinoma/Uterine Papillary Serous Carcinoma	-3.07408	0.971112	-3.16552	0.00154804	0.112272
TCF3	Breast Cancer	factor(sample_subtypes)Breast Invasive Ductal Carcinoma	-2.83776	0.896371	-3.16583	0.00154639	0.112272
ASXL1	Head and Neck Cancer	relevel(factor(race), ref = "Stage IV")Stage I	2.31801	0.732519	3.16443	0.00155385	0.112435
MED12	Colorectal Cancer	relevel(factor(race), ref = "Stage IV")Stage I	0.93361	0.29531	3.16145	0.00156985	0.113076
IRS2	Endometrial Cancer	factor(sample_subtypes)Uterine Serous Carcinoma/Uterine Papillary Serous Carcinoma	-3.32216	1.05077	-3.16164	0.00156883	0.113076
BAP1	Hepatobiliary Cancer	factor(sample_all$sex)Male	-0.791787	0.250721	-3.15804	0.00158831	0.114145
NOTCH3	Non-Small Cell Lung Cancer	factor(sample_subtypes)Lung Adenocarcinoma	-1.20902	0.38294	-3.15721	0.00159288	0.114214
DAXX	Endometrial Cancer	factor(sample_subtypes)Uterine Serous Carcinoma/Uterine Papillary Serous Carcinoma	-3.99846	1.26675	-3.15647	0.00159689	0.114243
CHEK2	Ovarian Cancer	factor(sample_subtypes)High-Grade Serous Ovarian Cancer	-2.40835	0.763713	-3.15348	0.00161338	0.115162
ERCC5	Endometrial Cancer	factor(sample_subtypes)Uterine Serous Carcinoma/Uterine Papillary Serous Carcinoma	-3.31206	1.0508	-3.15195	0.00162186	0.115506
KMT2A	Colorectal Cancer	factor(sample_subtypes)Rectal Adenocarcinoma	-0.713288	0.226384	-3.15079	0.0016283	0.115676
HIST1H3I	Colorectal Cancer	relevel(factor(race), ref = "Stage IV")Stage II/III	2.5083	0.796234	3.15021	0.00163156	0.115676
PLCG2	Colorectal Cancer	factor(sample_subtypes)Rectal Adenocarcinoma	-0.879708	0.27947	-3.14777	0.00164522	0.116383
GREM1	Colorectal Cancer	relevel(factor(race), ref = "Stage IV")Stage I	2.20508	0.701912	3.14153	0.00168067	0.118626
KMT2D	Melanoma	factor(sample_subtypes)Cutaneous Melanoma	1.87557	0.597283	3.14017	0.0016885	0.118914
EED	Pancreatic Cancer	relevel(factor(race), ref = "Stage IV")Stage I	2.7866	0.88882	3.13516	0.00171758	0.12068
PREX2	Melanoma	factor(sample_subtypes)Cutaneous Melanoma	2.28621	0.72936	3.13454	0.00172122	0.12068
NBN	Colorectal Cancer	relevel(factor(race), ref = "Stage IV")Stage I	1.22337	0.39046	3.13316	0.00172937	0.120743
RICTOR	Colorectal Cancer	relevel(factor(race), ref = "Stage IV")Stage I	1.09514	0.34954	3.13309	0.00172975	0.120743
ALK	Colorectal Cancer	relevel(factor(race), ref = "Stage IV")Stage I	0.895464	0.285924	3.13183	0.0017372	0.120996
NOTCH3	Pancreatic Cancer	factor(sample_subtypes)Pancreatic Adenocarcinoma	-3.71891	1.18802	-3.13035	0.00174599	0.121175
HLA-B	Cervical Cancer	relevel(factor(race), ref = "Stage IV")Stage I	2.62895	0.839892	3.1301	0.00174744	0.121175
ARID1A	Non-Small Cell Lung Cancer	factor(sample_subtypes)Lung Neuroendocrine Tumor	1.82967	0.585244	3.12634	0.00176998	0.122469
NF1	Colorectal Cancer	relevel(factor(race), ref = "Stage IV")Stage I	0.86892	0.278089	3.12461	0.0017804	0.122922
KIT	Ovarian Cancer	factor(aya_status)1	3.03088	0.97046	3.12313	0.00178938	0.123272
MED12	Melanoma	factor(sample_all$sex)Male	-0.838749	0.268649	-3.1221	0.00179563	0.123371
CDK12	Breast Cancer	factor(sample_subtypes)Breast Invasive Ductal Carcinoma	-2.43793	0.78104	-3.12139	0.00179998	0.123371
SPEN	Breast Cancer	factor(sample_subtypes)Breast Invasive Lobular Carcinoma	-1.98715	0.636708	-3.12098	0.00180251	0.123371
RB1	Soft Tissue Sarcoma	factor(sample_subtypes)Myxofibrosarcoma	3.41067	1.09746	3.10779	0.00188493	0.128455
NF1	Melanoma	factor(aya_status)1	-1.07126	0.344691	-3.10788	0.00188433	0.128455
KIT	Germ Cell Tumor	relevel(factor(race), ref = "Stage IV")Stage II/III	1.75588	0.565861	3.10302	0.00191555	0.129982
ARID1A	Colorectal Cancer	relevel(factor(race), ref = "Stage IV")Stage II/III	1.14398	0.368654	3.10312	0.00191489	0.129982
PRKD1	Colorectal Cancer	relevel(factor(race), ref = "Stage IV")Stage II/III	1.74204	0.561796	3.10085	0.00192968	0.13066
ARID2	Head and Neck Cancer	relevel(factor(race), ref = "Stage IV")others	3.19793	1.03177	3.09946	0.00193871	0.130991
SMARCB1	Bladder Cancer	relevel(factor(race), ref = "Stage IV")Stage I	1.24234	0.401129	3.0971	0.00195425	0.13176
APC	Non-Small Cell Lung Cancer	relevel(factor(race), ref = "Stage IV")Stage I	-1.01163	0.326821	-3.09538	0.0019656	0.132243
KMT2D	Endometrial Cancer	factor(sample_subtypes)Uterine Serous Carcinoma/Uterine Papillary Serous Carcinoma	-2.31314	0.748078	-3.09211	0.00198743	0.133428
TP53	Non-Small Cell Lung Cancer	relevel(factor(race), ref = "Stage IV")others	-0.701694	0.227005	-3.09109	0.0019942	0.133599
MGA	Colorectal Cancer	relevel(factor(race), ref = "Stage IV")Stage II/III	1.41308	0.457845	3.08637	0.00202617	0.135168
MDC1	Head and Neck Cancer	relevel(factor(race), ref = "Stage IV")Stage I	2.73559	0.886272	3.08663	0.00202439	0.135168
DDR2	Non-Small Cell Lung Cancer	factor(sample_subtypes)Lung Squamous Cell Carcinoma	-1.43767	0.466315	-3.08304	0.00204895	0.1364
KDM5A	Breast Cancer	factor(sample_subtypes)Breast Invasive Lobular Carcinoma	-2.83012	0.91833	-3.08181	0.00205744	0.136677
STK19	Breast Cancer	factor(sample_all$sex)Male	2.89217	0.93938	3.0788	0.00207834	0.137776
MET	Endometrial Cancer	factor(sample_subtypes)Uterine Serous Carcinoma/Uterine Papillary Serous Carcinoma	-2.98304	0.969327	-3.07744	0.00208787	0.138119
BAP1	Hepatobiliary Cancer	factor(sample_subtypes)Intrahepatic Cholangiocarcinoma	3.11536	1.01399	3.07237	0.00212364	0.140192
PREX2	Pancreatic Cancer	relevel(factor(race), ref = "Stage IV")Stage II/III	4.58949	1.49458	3.07075	0.0021352	0.140661
ARID2	Esophagogastric Cancer	factor(aya_status)1	1.5557	0.506864	3.06927	0.00214583	0.141067
SETD2	Melanoma	factor(sample_all$sex)Male	0.78766	0.256718	3.0682	0.00215356	0.141281
ESR1	Breast Cancer	relevel(factor(race), ref = "Stage IV")Stage II/III	-1.56962	0.511815	-3.06678	0.00216381	0.141345
NOTCH3	Colorectal Cancer	factor(sample_subtypes)Rectal Adenocarcinoma	-0.579315	0.188963	-3.06576	0.00217121	0.141345
H3F3B	Endometrial Cancer	relevel(factor(race), ref = "Stage IV")Stage II/III	2.78369	0.907544	3.06728	0.00216019	0.141345
PTPRT	Pancreatic Cancer	relevel(factor(race), ref = "Stage IV")others	1.52643	0.497923	3.06559	0.00217241	0.141345
ERCC3	Colorectal Cancer	relevel(factor(race), ref = "Stage IV")Stage II/III	1.91983	0.626628	3.06375	0.00218579	0.141924
CDH1	Non-Small Cell Lung Cancer	relevel(factor(race), ref = "Stage IV")Stage II/III	1.5075	0.492371	3.06171	0.00220074	0.141973
CREBBP	Endometrial Cancer	factor(sample_subtypes)Uterine Serous Carcinoma/Uterine Papillary Serous Carcinoma	-2.96619	0.968455	-3.0628	0.00219275	0.141973
XRCC2	Colorectal Cancer	relevel(factor(race), ref = "Stage IV")others	1.97645	0.645503	3.06187	0.00219956	0.141973
RPS6KA4	Endometrial Cancer	factor(sample_subtypes)Uterine Serous Carcinoma/Uterine Papillary Serous Carcinoma	-2.96662	0.969103	-3.0612	0.00220451	0.141973
SETD2	Head and Neck Cancer	relevel(factor(race), ref = "Stage IV")Stage I	2.60307	0.850967	3.05896	0.00222109	0.142742
KMT2B	Colorectal Cancer	relevel(factor(race), ref = "Stage IV")Stage II/III	1.27013	0.415297	3.05837	0.00222548	0.142742
DIS3	Endometrial Cancer	factor(sample_subtypes)Uterine Serous Carcinoma/Uterine Papillary Serous Carcinoma	-2.96296	0.969413	-3.05645	0.00223976	0.143078
DNAJB1	Colorectal Cancer	relevel(factor(race), ref = "Stage IV")Stage I	1.54171	0.504393	3.05657	0.00223882	0.143078
KMT2C	Hepatobiliary Cancer	relevel(factor(race), ref = "Stage IV")Stage II/III	2.17778	0.712744	3.05548	0.00224699	0.14325
AXIN1	Colorectal Cancer	factor(sample_subtypes)Rectal Adenocarcinoma	-1.05275	0.344717	-3.05395	0.00225849	0.143694
APC	Colorectal Cancer	factor(sample_all$sex)Male	0.232788	0.0762472	3.05307	0.00226516	0.143828
PIK3C2G	Melanoma	factor(aya_status)1	-1.59538	0.522867	-3.05121	0.00227923	0.144432
ANKRD11	Colorectal Cancer	relevel(factor(race), ref = "Stage IV")Stage I	0.824423	0.270322	3.04979	0.00229005	0.144827
KDR	Colorectal Cancer	relevel(factor(race), ref = "Stage IV")Stage I	0.931752	0.305824	3.0467	0.00231372	0.145163
BAP1	Bladder Cancer	relevel(factor(race), ref = "Stage IV")Stage I	0.896753	0.294295	3.04712	0.00231046	0.145163
PMS2	Endometrial Cancer	factor(sample_subtypes)Uterine Endometrioid Carcinoma	-2.15804	0.707932	-3.04837	0.00230086	0.145163
PTPRS	Endometrial Cancer	factor(sample_subtypes)Uterine Serous Carcinoma/Uterine Papillary Serous Carcinoma	-2.95063	0.968435	-3.0468	0.00231293	0.145163
KRAS	Ovarian Cancer	factor(sample_subtypes)Low-Grade Serous Ovarian Cancer	1.28535	0.422066	3.04537	0.00232396	0.145516
BCL6	Colorectal Cancer	relevel(factor(race), ref = "Stage IV")Stage I	1.27395	0.419069	3.03996	0.00236613	0.147573
CSDE1	Endometrial Cancer	factor(sample_subtypes)Uterine Serous Carcinoma/Uterine Papillary Serous Carcinoma	-3.85384	1.26757	-3.04033	0.00236317	0.147573
PMS1	Colorectal Cancer	factor(aya_status)1	1.02288	0.33669	3.03806	0.0023811	0.148214
ROS1	Colorectal Cancer	relevel(factor(race), ref = "Stage IV")Stage II/III	1.49671	0.493134	3.0351	0.00240454	0.149379
NOTCH1	Breast Cancer	factor(aya_status)1	1.03123	0.339845	3.0344	0.00241014	0.149433
IL7R	Breast Cancer	factor(sample_subtypes)Breast Invasive Ductal Carcinoma	-3.49632	1.15327	-3.03165	0.0024322	0.150506
TSC1	Endometrial Cancer	factor(sample_subtypes)Uterine Serous Carcinoma/Uterine Papillary Serous Carcinoma	-2.9308	0.968513	-3.02609	0.00247742	0.153005
CDK12	Breast Cancer	factor(sample_subtypes)Breast Invasive Lobular Carcinoma	-2.75992	0.912775	-3.02365	0.00249742	0.153939
CSDE1	Gastrointestinal Stromal Tumor	relevel(factor(race), ref = "Stage IV")others	2.213	0.732083	3.02288	0.00250381	0.154033
TET2	Colorectal Cancer	relevel(factor(race), ref = "Stage IV")Stage I	0.962733	0.318593	3.02183	0.00251251	0.154268
PLK2	Breast Cancer	factor(sample_subtypes)Breast Invasive Ductal Carcinoma	-2.41392	0.799006	-3.02116	0.00251812	0.154313
SPEN	Breast Cancer	factor(sample_subtypes)Invasive Breast Carcinoma	-2.49822	0.827384	-3.01942	0.0025326	0.1549
GATA2	Non-Small Cell Lung Cancer	factor(sample_subtypes)Lung Adenocarcinoma	-1.62929	0.540153	-3.01634	0.00255848	0.156181
CDKN2A	Non-Small Cell Lung Cancer	factor(sample_subtypes)Lung Squamous Cell Carcinoma	1.31177	0.435072	3.01507	0.00256919	0.156532
GNA11	Colorectal Cancer	relevel(factor(race), ref = "Stage IV")Stage I	1.5138	0.502454	3.01282	0.00258831	0.157344
ATR	Head and Neck Cancer	relevel(factor(race), ref = "Stage IV")Stage I	2.47342	0.821096	3.01234	0.00259246	0.157344
FYN	Non-Small Cell Lung Cancer	factor(sample_all$sex)Male	0.992746	0.329667	3.01136	0.00260077	0.157546
NOTCH4	Endometrial Cancer	factor(sample_subtypes)Uterine Serous Carcinoma/Uterine Papillary Serous Carcinoma	-2.91471	0.968348	-3.00998	0.00261267	0.157964
HLA-A	Colorectal Cancer	relevel(factor(race), ref = "Stage IV")Stage I	1.10713	0.367988	3.00861	0.00262445	0.158373
KDM6A	Bladder Cancer	relevel(factor(race), ref = "Stage IV")Stage I	0.470438	0.156433	3.00728	0.00263598	0.158766
FGFR4	Colorectal Cancer	factor(sample_subtypes)Rectal Adenocarcinoma	-1.25528	0.41759	-3.00602	0.00264694	0.159123
EGFR	Non-Small Cell Lung Cancer	factor(sample_subtypes)Non-Small Cell Lung Cancer	1.96424	0.654074	3.00308	0.00267259	0.16036
PBRM1	Non-Small Cell Lung Cancer	factor(sample_all$sex)Male	0.525332	0.175049	3.00105	0.00269049	0.160465
CDK12	Colorectal Cancer	relevel(factor(race), ref = "Stage IV")Stage I	0.953825	0.317732	3.00198	0.00268229	0.160465
RNF43	Hepatobiliary Cancer	factor(sample_subtypes)Intrahepatic Cholangiocarcinoma	-2.49702	0.831886	-3.00163	0.00268536	0.160465
SESN3	Colorectal Cancer	relevel(factor(race), ref = "Stage IV")Stage I	1.39528	0.465003	3.00058	0.00269463	0.160465
CIC	Colorectal Cancer	relevel(factor(race), ref = "Stage IV")Stage I	0.8552	0.285573	2.99468	0.00274736	0.162686
NCOA3	Colorectal Cancer	relevel(factor(race), ref = "Stage IV")Stage I	0.995323	0.3323	2.99526	0.00274215	0.162686
CARM1	Colorectal Cancer	factor(aya_status)1	1.27883	0.427012	2.99482	0.00274606	0.162686
ERRFI1	Colorectal Cancer	relevel(factor(race), ref = "Stage IV")Stage I	1.52166	0.508453	2.99273	0.00276498	0.163423
TBX3	Head and Neck Cancer	relevel(factor(race), ref = "Stage IV")Stage I	4.22289	1.41138	2.99202	0.00277137	0.163495
RAD52	Colorectal Cancer	relevel(factor(race), ref = "Stage IV")Stage I	1.4954	0.501301	2.98304	0.00285404	0.168059
PAK7	Colorectal Cancer	factor(sample_subtypes)Rectal Adenocarcinoma	-1.43003	0.47966	-2.98135	0.00286984	0.168675
MED12	Colorectal Cancer	relevel(factor(race), ref = "Stage IV")others	1.11472	0.374403	2.97733	0.0029077	0.170584
HGF	Melanoma	factor(sample_all$sex)Male	0.752219	0.252719	2.97651	0.00291554	0.170726
PIK3C3	Non-Small Cell Lung Cancer	relevel(factor(race), ref = "Stage IV")Stage II/III	1.24091	0.41718	2.97452	0.00293448	0.171518
MSH3	Endometrial Cancer	factor(sample_subtypes)Uterine Serous Carcinoma/Uterine Papillary Serous Carcinoma	-3.76585	1.26687	-2.97256	0.00295327	0.172297
AKT3	Colorectal Cancer	factor(aya_status)1	1.05604	0.355872	2.96746	0.00300267	0.174857
TNFRSF14	Colorectal Cancer	relevel(factor(race), ref = "Stage IV")Stage II/III	2.29494	0.773835	2.96567	0.00302019	0.175554
LATS2	Head and Neck Cancer	relevel(factor(race), ref = "Stage IV")Stage I	3.32886	1.12483	2.95945	0.00308192	0.178814
HRAS	Bladder Cancer	factor(aya_status)1	1.78085	0.60341	2.95131	0.0031643	0.17942
KIT	Non-Small Cell Lung Cancer	factor(sample_subtypes)Lung Adenocarcinoma	-1.29852	0.440009	-2.95113	0.00316614	0.17942
PDGFRA	Non-Small Cell Lung Cancer	factor(sample_all$sex)Male	0.43412	0.1469	2.95521	0.00312458	0.17942
SMO	Non-Small Cell Lung Cancer	factor(sample_subtypes)Lung Squamous Cell Carcinoma	-1.47704	0.499682	-2.95595	0.00311707	0.17942
BCOR	Colorectal Cancer	relevel(factor(race), ref = "Stage IV")Stage I	0.872223	0.294945	2.95723	0.00310412	0.17942
ALOX12B	Colorectal Cancer	relevel(factor(race), ref = "Stage IV")Stage II/III	1.84754	0.625957	2.95155	0.00316181	0.17942
PIK3C2G	Melanoma	factor(sample_subtypes)Cutaneous Melanoma	2.99468	1.01285	2.9567	0.00310947	0.17942
PTPRD	Colorectal Cancer	relevel(factor(race), ref = "Stage IV")Stage I	0.90205	0.305407	2.9536	0.00314088	0.17942
PTPRD	Colorectal Cancer	factor(sample_subtypes)Rectal Adenocarcinoma	-0.802116	0.271508	-2.9543	0.00313383	0.17942
GREM1	Melanoma	relevel(factor(race), ref = "Stage IV")others	2.04017	0.690826	2.95323	0.00314464	0.17942
MAX	Colorectal Cancer	relevel(factor(race), ref = "Stage IV")Stage II/III	2.39519	0.811159	2.9528	0.0031491	0.17942
DUSP4	Melanoma	relevel(factor(race), ref = "Stage IV")Stage I	1.91342	0.647499	2.9551	0.00312567	0.17942
CSDE1	Gastrointestinal Stromal Tumor	factor(aya_status)1	1.84342	0.624369	2.95245	0.00315261	0.17942
FLCN	Colorectal Cancer	factor(sample_all$sex)Male	-0.583727	0.197894	-2.9497	0.00318086	0.179932
APC	Non-Small Cell Lung Cancer	factor(sample_subtypes)Lung Adenocarcinoma	-0.974157	0.330348	-2.94888	0.0031893	0.180029
PIK3R1	Colorectal Cancer	relevel(factor(race), ref = "Stage IV")Stage II/III	1.33665	0.453468	2.94763	0.00320224	0.180029
ZFHX3	Colorectal Cancer	relevel(factor(race), ref = "Stage IV")Stage I	0.694214	0.23554	2.94733	0.00320535	0.180029
INPP4A	Non-Small Cell Lung Cancer	factor(sample_all$sex)Male	0.73012	0.247634	2.94838	0.00319445	0.180029
SDHB	Non-Small Cell Lung Cancer	factor(sample_subtypes)Lung Squamous Cell Carcinoma	-3.33289	1.13164	-2.94518	0.00322767	0.180961
TET2	Colorectal Cancer	relevel(factor(race), ref = "Stage IV")others	1.17812	0.400184	2.94394	0.00324059	0.181044
GATA1	Non-Small Cell Lung Cancer	factor(sample_all$sex)Male	-1.11344	0.378181	-2.94421	0.00323783	0.181044
KDM5A	Non-Small Cell Lung Cancer	factor(sample_subtypes)Lung Adenocarcinoma	-1.41241	0.480219	-2.94117	0.00326972	0.182349
FGFR3	Bladder Cancer	factor(sample_subtypes)Upper Tract Urothelial Carcinoma	0.477529	0.162429	2.93993	0.00328284	0.182758
ROS1	Breast Cancer	factor(sample_subtypes)Breast Invasive Lobular Carcinoma	-3.12883	1.06552	-2.93645	0.00331995	0.183853
BCL2L1	Colorectal Cancer	relevel(factor(race), ref = "Stage IV")Stage I	1.98689	0.676627	2.93647	0.00331975	0.183853
FUBP1	Endometrial Cancer	factor(sample_subtypes)Uterine Carcinosarcoma/Uterine Malignant Mixed Mullerian Tumor	-3.72119	1.26719	-2.93656	0.00331873	0.183853
RHOA	Colorectal Cancer	relevel(factor(race), ref = "Stage IV")Stage I	1.47351	0.501944	2.93561	0.00332893	0.184028
EP300	Melanoma	factor(sample_all$sex)Male	0.929825	0.316839	2.93469	0.00333878	0.184135
MUTYH	Colorectal Cancer	relevel(factor(race), ref = "Stage IV")Stage II/III	1.84649	0.629303	2.93418	0.0033443	0.184135
EED	Non-Small Cell Lung Cancer	factor(sample_subtypes)Lung Adenocarcinoma	-1.85105	0.630937	-2.93381	0.00334834	0.184135
EGFL7	Colorectal Cancer	factor(sample_subtypes)others	3.27315	1.11796	2.92778	0.0034139	0.187415
BRCA2	Colorectal Cancer	factor(sample_subtypes)Rectal Adenocarcinoma	-0.607024	0.207618	-2.92375	0.00345839	0.18943
MSH2	Colorectal Cancer	factor(aya_status)1	0.756462	0.258763	2.92337	0.0034626	0.18943
NOTCH1	Colorectal Cancer	relevel(factor(race), ref = "Stage IV")Stage II/III	1.32506	0.453415	2.9224	0.00347349	0.189698
SRC	Colorectal Cancer	relevel(factor(race), ref = "Stage IV")Stage I	1.21922	0.417677	2.91904	0.00351109	0.191421
CCND1	Bladder Cancer	relevel(factor(race), ref = "Stage IV")Stage I	2.15787	0.739729	2.91711	0.00353295	0.191622
MYCL	Colorectal Cancer	relevel(factor(race), ref = "Stage IV")Stage I	1.97338	0.676328	2.91779	0.00352519	0.191622
NOTCH3	Colorectal Cancer	relevel(factor(race), ref = "Stage IV")Stage II/III	1.23803	0.4244	2.91713	0.00353267	0.191622
YES1	Endometrial Cancer	factor(sample_subtypes)Uterine Carcinosarcoma/Uterine Malignant Mixed Mullerian Tumor	-3.69515	1.26707	-2.9163	0.00354207	0.191787
TET1	Endometrial Cancer	factor(sample_subtypes)Uterine Carcinosarcoma/Uterine Malignant Mixed Mullerian Tumor	-3.69219	1.26719	-2.91368	0.00357191	0.193072
POLD1	Endometrial Cancer	factor(sample_subtypes)Uterine Carcinosarcoma/Uterine Malignant Mixed Mullerian Tumor	-3.69124	1.26767	-2.91182	0.00359326	0.193895
KIT	Gastrointestinal Stromal Tumor	factor(sample_all$sex)Male	0.657444	0.225844	2.91105	0.00360216	0.194044
EPHB1	Colorectal Cancer	factor(aya_status)1	0.659867	0.226751	2.91009	0.0036132	0.194308
TBX3	Endometrial Cancer	factor(sample_subtypes)Uterine Endometrioid Carcinoma	-1.85185	0.636599	-2.90898	0.00362615	0.194343
PLK2	Colorectal Cancer	relevel(factor(race), ref = "Stage IV")Stage I	1.13818	0.391217	2.90933	0.00362208	0.194343
LATS1	Breast Cancer	factor(sample_subtypes)Breast Invasive Ductal Carcinoma	-2.54032	0.873945	-2.90673	0.0036523	0.195413
KRAS	Bladder Cancer	relevel(factor(race), ref = "Stage IV")Stage I	0.870262	0.299569	2.90505	0.00367199	0.195804
PTPRT	Melanoma	factor(aya_status)1	-0.861005	0.296351	-2.90536	0.00366832	0.195804
PBRM1	Endometrial Cancer	factor(sample_subtypes)Uterine Carcinosarcoma/Uterine Malignant Mixed Mullerian Tumor	-3.68033	1.26724	-2.9042	0.00368196	0.196005
MET	Endometrial Cancer	factor(sample_subtypes)Uterine Carcinosarcoma/Uterine Malignant Mixed Mullerian Tumor	-3.67582	1.26667	-2.90196	0.0037084	0.19614
CBL	Endometrial Cancer	factor(sample_subtypes)Uterine Carcinosarcoma/Uterine Malignant Mixed Mullerian Tumor	-3.6778	1.26735	-2.90196	0.00370842	0.19614
IGF1R	Endometrial Cancer	factor(sample_subtypes)Uterine Carcinosarcoma/Uterine Malignant Mixed Mullerian Tumor	-3.679	1.26731	-2.903	0.00369603	0.19614
EPHA7	Colorectal Cancer	factor(aya_status)1	0.69842	0.240678	2.90188	0.0037093	0.19614
STAG2	Endometrial Cancer	factor(sample_subtypes)Uterine Serous Carcinoma/Uterine Papillary Serous Carcinoma	-2.68196	0.92475	-2.9002	0.00372928	0.196539
RRAGC	Colorectal Cancer	relevel(factor(race), ref = "Stage IV")Stage I	1.67374	0.577059	2.90046	0.0037262	0.196539
PALB2	Esophagogastric Cancer	relevel(factor(race), ref = "Stage IV")others	2.12657	0.733397	2.89961	0.00373624	0.196578
PLK2	Melanoma	relevel(factor(race), ref = "Stage IV")Stage I	1.99178	0.687314	2.89792	0.00375646	0.197314
ESR1	Melanoma	factor(sample_all$sex)Male	1.54539	0.533436	2.89704	0.00376701	0.197528
PTPRS	Endometrial Cancer	factor(sample_subtypes)Uterine Carcinosarcoma/Uterine Malignant Mixed Mullerian Tumor	-3.66848	1.2665	-2.89654	0.00377303	0.197528
EPHB1	Melanoma	factor(sample_all$sex)Male	0.842235	0.290852	2.89575	0.00378248	0.197696
PLK2	Colorectal Cancer	factor(sample_subtypes)Rectal Adenocarcinoma	-1.28846	0.44509	-2.89484	0.00379356	0.197947
IRS2	Colorectal Cancer	factor(sample_all$sex)Male	0.572161	0.197728	2.89367	0.00380767	0.19803
PLK2	Endometrial Cancer	factor(sample_subtypes)Uterine Carcinosarcoma/Uterine Malignant Mixed Mullerian Tumor	-3.66705	1.26726	-2.89369	0.00380749	0.19803
SMARCB1	Bladder Cancer	relevel(factor(race), ref = "Stage IV")others	1.53495	0.53073	2.89215	0.0038262	0.198667
STK11	Endometrial Cancer	factor(sample_subtypes)Uterine Carcinosarcoma/Uterine Malignant Mixed Mullerian Tumor	-3.66468	1.26742	-2.89145	0.00383465	0.198779
ARID1B	Endometrial Cancer	factor(sample_subtypes)Uterine Carcinosarcoma/Uterine Malignant Mixed Mullerian Tumor	-3.66011	1.26642	-2.89013	0.0038508	0.19929
NOTCH1	Colorectal Cancer	relevel(factor(race), ref = "Stage IV")Stage I	0.797875	0.276461	2.88603	0.00390134	0.200008
TET2	Endometrial Cancer	factor(sample_subtypes)Uterine Carcinosarcoma/Uterine Malignant Mixed Mullerian Tumor	-3.65432	1.26648	-2.88542	0.00390896	0.200008
RPTOR	Non-Small Cell Lung Cancer	factor(sample_subtypes)Lung Adenocarcinoma	-1.38282	0.479238	-2.88546	0.00390848	0.200008
BTK	Non-Small Cell Lung Cancer	factor(sample_all$sex)Male	-0.676405	0.234232	-2.88775	0.00388004	0.200008
RBM10	Hepatobiliary Cancer	relevel(factor(race), ref = "Stage IV")Stage I	1.7346	0.600808	2.8871	0.00388805	0.200008
KLF4	Non-Small Cell Lung Cancer	relevel(factor(race), ref = "Stage IV")Stage II/III	1.5722	0.544362	2.88815	0.00387519	0.200008
HIST1H1C	Non-Small Cell Lung Cancer	factor(sample_subtypes)Lung Squamous Cell Carcinoma	-1.60222	0.555248	-2.88559	0.00390675	0.200008
APC	Endometrial Cancer	factor(sample_subtypes)Uterine Serous Carcinoma/Uterine Papillary Serous Carcinoma	-2.6664	0.924366	-2.88457	0.00391947	0.200222
DICER1	Colorectal Cancer	factor(sample_subtypes)Rectal Adenocarcinoma	-1.03937	0.360509	-2.88306	0.00393833	0.200861
AR	Colorectal Cancer	relevel(factor(race), ref = "Stage IV")Stage I	0.84769	0.294156	2.88177	0.00395447	0.20095
SETD2	Colorectal Cancer	factor(sample_subtypes)Rectal Adenocarcinoma	-0.680474	0.236113	-2.88199	0.0039517	0.20095
EPHB1	Non-Small Cell Lung Cancer	factor(sample_subtypes)Lung Adenocarcinoma	-1.101	0.382106	-2.8814	0.00395915	0.20095
NFE2L2	Endometrial Cancer	factor(sample_subtypes)Uterine Carcinosarcoma/Uterine Malignant Mixed Mullerian Tumor	-3.02936	1.05194	-2.87978	0.00397957	0.201341
ATR	Endometrial Cancer	factor(sample_subtypes)Uterine Serous Carcinoma/Uterine Papillary Serous Carcinoma	-2.66244	0.924397	-2.88019	0.00397441	0.201341
RAF1	Colorectal Cancer	factor(sample_all$sex)Male	0.809735	0.281361	2.87793	0.004003	0.201559
ERBB3	Hepatobiliary Cancer	factor(sample_subtypes)Hepatocellular Carcinoma	-2.32185	0.80662	-2.87849	0.00399588	0.201559
GLI1	Hepatobiliary Cancer	relevel(factor(race), ref = "Stage IV")Stage II/III	2.71377	0.942952	2.87795	0.00400273	0.201559
ARID2	Endometrial Cancer	factor(sample_subtypes)Uterine Carcinosarcoma/Uterine Malignant Mixed Mullerian Tumor	-3.64449	1.26707	-2.8763	0.00402366	0.201696
TGFBR2	Endometrial Cancer	factor(sample_subtypes)Uterine Carcinosarcoma/Uterine Malignant Mixed Mullerian Tumor	-3.02773	1.05266	-2.87626	0.00402424	0.201696
FOXA1	Melanoma	relevel(factor(race), ref = "Stage IV")others	2.46573	0.857286	2.87621	0.00402486	0.201696
ABL1	Melanoma	factor(sample_all$sex)Male	1.39277	0.484991	2.87174	0.00408223	0.203924
DAXX	Endometrial Cancer	relevel(factor(race), ref = "Stage IV")Stage I	-1.74844	0.608829	-2.87181	0.00408129	0.203924
PGR	Colorectal Cancer	relevel(factor(race), ref = "Stage IV")Stage I	0.997416	0.34742	2.87092	0.00409281	0.204131
PBRM1	Hepatobiliary Cancer	factor(sample_subtypes)Intrahepatic Cholangiocarcinoma	2.10393	0.733408	2.86871	0.00412152	0.205239
SF3B1	Colorectal Cancer	factor(sample_all$sex)Male	0.766506	0.267383	2.8667	0.00414778	0.205785
CCND1	Colorectal Cancer	relevel(factor(race), ref = "Stage IV")Stage II/III	2.31011	0.806074	2.86588	0.00415851	0.205785
ARID2	Colorectal Cancer	relevel(factor(race), ref = "Stage IV")Stage I	0.842842	0.294021	2.8666	0.00414901	0.205785
ARID2	Bladder Cancer	relevel(factor(race), ref = "Stage IV")Stage I	0.775776	0.270691	2.86591	0.00415807	0.205785
RB1	Endometrial Cancer	factor(sample_subtypes)Uterine Serous Carcinoma/Uterine Papillary Serous Carcinoma	-2.64801	0.924407	-2.86455	0.00417599	0.205804
TSC1	Colorectal Cancer	factor(aya_status)1	0.820399	0.286415	2.86437	0.00417843	0.205804
ERG	Melanoma	relevel(factor(race), ref = "Stage IV")Stage I	1.33814	0.467144	2.86451	0.0041766	0.205804
CCND1	Non-Small Cell Lung Cancer	factor(sample_all$sex)Male	1.64598	0.574941	2.86286	0.00419831	0.2061
BTK	Colorectal Cancer	relevel(factor(race), ref = "Stage IV")Stage I	1.28871	0.450168	2.86273	0.00420004	0.2061
TGFBR2	Breast Cancer	factor(aya_status)1	1.47669	0.515887	2.86244	0.00420399	0.2061
TET2	Endometrial Cancer	factor(sample_subtypes)Uterine Serous Carcinoma/Uterine Papillary Serous Carcinoma	-2.64505	0.924484	-2.86111	0.00422156	0.206641
PTPN11	Bladder Cancer	factor(sample_subtypes)Upper Tract Urothelial Carcinoma	1.63584	0.571882	2.86045	0.00423042	0.206754
CARD11	Colorectal Cancer	relevel(factor(race), ref = "Stage IV")Stage I	0.768719	0.26897	2.858	0.00426314	0.208032
PIK3CG	Non-Small Cell Lung Cancer	factor(sample_subtypes)Lung Squamous Cell Carcinoma	-0.998692	0.349646	-2.8563	0.00428616	0.208833
ARID2	Melanoma	factor(aya_status)1	-1.70342	0.596889	-2.85383	0.00431954	0.210136
KEAP1	Endometrial Cancer	factor(sample_subtypes)Uterine Endometrioid Carcinoma	-2.00311	0.702514	-2.85135	0.00435344	0.211459
FGFR2	Esophagogastric Cancer	factor(sample_subtypes)others	3.65421	1.28301	2.84815	0.00439741	0.213268
RAD50	Colorectal Cancer	factor(sample_subtypes)Rectal Adenocarcinoma	-1.09524	0.384796	-2.84628	0.00442332	0.214196
EIF4A2	Esophagogastric Cancer	relevel(factor(race), ref = "Stage IV")Stage I	2.77396	0.974767	2.84576	0.00443051	0.214216
TOP1	Colorectal Cancer	relevel(factor(race), ref = "Stage IV")Stage I	1.28454	0.451781	2.84328	0.0044652	0.215235
PTPRT	Colorectal Cancer	relevel(factor(race), ref = "Stage IV")Stage II/III	1.13907	0.400591	2.84347	0.00446254	0.215235
PIK3CA	Cervical Cancer	factor(aya_status)1	-1.86009	0.654469	-2.84214	0.0044812	0.215677
BLM	Endometrial Cancer	factor(sample_subtypes)Uterine Carcinosarcoma/Uterine Malignant Mixed Mullerian Tumor	-2.98751	1.05169	-2.84067	0.00450186	0.216343
PARP1	Breast Cancer	factor(sample_all$sex)Male	2.19688	0.773583	2.83988	0.00451306	0.216391
RTEL1	Colorectal Cancer	relevel(factor(race), ref = "Stage IV")Stage I	1.20179	0.42322	2.83963	0.00451655	0.216391
IKBKE	Non-Small Cell Lung Cancer	factor(sample_subtypes)Lung Adenocarcinoma	-1.78138	0.627739	-2.83777	0.00454293	0.217325
RPS6KA4	Non-Small Cell Lung Cancer	factor(sample_subtypes)Lung Adenocarcinoma	-1.52598	0.538034	-2.83621	0.00456519	0.21806
ERBB2	Bladder Cancer	factor(sample_all$sex)Male	0.639804	0.225649	2.8354	0.00457686	0.218288
FAT1	Melanoma	factor(sample_subtypes)Melanoma of Unknown Primary	2.91023	1.02757	2.83215	0.00462359	0.220184
SYK	Melanoma	factor(sample_all$sex)Male	0.8977	0.317167	2.83037	0.00464946	0.221083
AR	Endometrial Cancer	factor(sample_subtypes)Uterine Carcinosarcoma/Uterine Malignant Mixed Mullerian Tumor	-2.97437	1.05153	-2.82862	0.00467487	0.221584
NFE2L2	Non-Small Cell Lung Cancer	factor(sample_subtypes)Lung Squamous Cell Carcinoma	1.69335	0.598838	2.82772	0.00468802	0.221584
ANKRD11	Ovarian Cancer	factor(sample_subtypes)High-Grade Serous Ovarian Cancer	-1.76592	0.624392	-2.82822	0.00468079	0.221584
ERF	Breast Cancer	factor(sample_subtypes)Breast Invasive Ductal Carcinoma	-3.43464	1.21463	-2.82774	0.00468786	0.221584
SETD2	Colorectal Cancer	relevel(factor(race), ref = "Stage IV")Stage II/III	1.39042	0.491896	2.82666	0.00470368	0.221993
YES1	Breast Cancer	factor(sample_subtypes)Breast Invasive Ductal Carcinoma	-3.15877	1.1183	-2.82463	0.0047336	0.223072
MYC	Ovarian Cancer	relevel(factor(race), ref = "Stage IV")Stage II/III	3.37147	1.19385	2.82402	0.00474249	0.223158
TP53	Hepatobiliary Cancer	factor(sample_subtypes)Gallbladder Adenocarcinoma, NOS	1.01007	0.358198	2.81988	0.00480419	0.225543
FAM175A	Bladder Cancer	relevel(factor(race), ref = "Stage IV")Stage I	1.72516	0.611832	2.81966	0.00480744	0.225543
NRAS	Melanoma	factor(sample_subtypes)Cutaneous Melanoma	0.949428	0.337036	2.81699	0.00484756	0.227056
BCOR	Melanoma	relevel(factor(race), ref = "Stage IV")Stage I	1.28968	0.457967	2.81609	0.00486123	0.227056
SRC	Melanoma	factor(sample_all$sex)Male	1.72416	0.612208	2.8163	0.00485803	0.227056
RAF1	Colorectal Cancer	relevel(factor(race), ref = "Stage IV")Stage II/III	1.76546	0.6274	2.81393	0.00489397	0.227912
AURKB	Non-Small Cell Lung Cancer	factor(sample_subtypes)Lung Adenocarcinoma	-2.24711	0.798471	-2.81427	0.00488879	0.227912
TP53	Esophagogastric Cancer	factor(sample_subtypes)Esophageal Adenocarcinoma	0.607524	0.216208	2.80991	0.0049556	0.229947
STK11	Non-Small Cell Lung Cancer	factor(aya_status)1	-2.01602	0.717493	-2.80981	0.00495712	0.229947
BTK	Endometrial Cancer	factor(sample_subtypes)Uterine Carcinosarcoma/Uterine Malignant Mixed Mullerian Tumor	-2.95452	1.05156	-2.80965	0.00495947	0.229947
CREBBP	Bladder Cancer	factor(sample_all$sex)Male	0.558707	0.199151	2.80545	0.00502471	0.232311
RAD50	Colorectal Cancer	relevel(factor(race), ref = "Stage IV")Stage I	1.02511	0.365405	2.80542	0.00502515	0.232311
FOXP1	Melanoma	factor(sample_all$sex)Male	1.17615	0.419649	2.8027	0.00506772	0.233936
MEN1	Hepatobiliary Cancer	relevel(factor(race), ref = "Stage IV")Stage II/III	2.68491	0.958603	2.80086	0.00509665	0.234648
KMT2C	Melanoma	factor(sample_subtypes)Melanoma of Unknown Primary	2.09955	0.74963	2.80078	0.00509798	0.234648
PARP1	Pancreatic Cancer	relevel(factor(race), ref = "Stage IV")Stage I	2.37478	0.848289	2.79949	0.00511832	0.235074
SHOC2	Colorectal Cancer	relevel(factor(race), ref = "Stage IV")Stage II/III	2.24656	0.802559	2.79925	0.00512211	0.235074
GATA1	Breast Cancer	relevel(factor(race), ref = "Stage IV")Stage II/III	1.64674	0.588524	2.79809	0.00514055	0.235494
IGF2	Non-Small Cell Lung Cancer	factor(sample_subtypes)Lung Squamous Cell Carcinoma	-2.44982	0.875642	-2.79774	0.00514615	0.235494
FGFR3	Colorectal Cancer	relevel(factor(race), ref = "Stage IV")Stage I	1.01967	0.364733	2.79565	0.00517947	0.235655
RNF43	Colorectal Cancer	factor(sample_subtypes)Colorectal Adenocarcinoma	-0.582086	0.2082	-2.7958	0.00517713	0.235655
NEGR1	Colorectal Cancer	relevel(factor(race), ref = "Stage IV")Stage I	1.2696	0.454046	2.79619	0.00517086	0.235655
STK19	Non-Small Cell Lung Cancer	factor(aya_status)1	2.30559	0.824484	2.7964	0.00516755	0.235655
RECQL	Bladder Cancer	factor(sample_subtypes)others	3.26165	1.16745	2.79382	0.00520893	0.236655
PDGFRA	Colorectal Cancer	factor(aya_status)1	0.76121	0.272525	2.79318	0.0052193	0.236785
RB1	Non-Small Cell Lung Cancer	relevel(factor(race), ref = "Stage IV")Stage I	-0.778749	0.279197	-2.78925	0.0052831	0.239337
PALB2	Colorectal Cancer	relevel(factor(race), ref = "Stage IV")Stage I	1.02041	0.366144	2.7869	0.00532149	0.240731
AMER1	Head and Neck Cancer	relevel(factor(race), ref = "Stage IV")Stage I	2.96042	1.06292	2.78516	0.00535005	0.241677
AKT3	Colorectal Cancer	relevel(factor(race), ref = "Stage IV")Stage I	1.27168	0.456862	2.7835	0.00537759	0.241884
FOXL2	Breast Cancer	factor(sample_subtypes)Breast Invasive Ductal Carcinoma	-3.09146	1.1105	-2.78385	0.00537175	0.241884
SPOP	Ovarian Cancer	factor(sample_subtypes)Low-Grade Serous Ovarian Cancer	-2.91586	1.04723	-2.78436	0.00536342	0.241884
TNFAIP3	Bladder Cancer	factor(aya_status)1	2.23786	0.804134	2.78294	0.00538691	0.241959
KMT2C	Esophagogastric Cancer	relevel(factor(race), ref = "Stage IV")Stage II/III	1.63864	0.589198	2.78114	0.00541676	0.242955
ARID2	Melanoma	factor(sample_subtypes)Cutaneous Melanoma	2.01552	0.726036	2.77606	0.00550219	0.24627
KMT2C	Melanoma	factor(sample_subtypes)Cutaneous Melanoma	2.01454	0.725747	2.77582	0.00550624	0.24627
MAP3K1	Colorectal Cancer	relevel(factor(race), ref = "Stage IV")Stage I	0.917941	0.330824	2.77471	0.00552509	0.246416
HNF1A	Colorectal Cancer	factor(sample_subtypes)Rectal Adenocarcinoma	-0.848106	0.305636	-2.77489	0.00552201	0.246416
TERT	Colorectal Cancer	relevel(factor(race), ref = "Stage IV")Stage I	0.961263	0.346581	2.77356	0.00554465	0.24694
TSC1	Colorectal Cancer	relevel(factor(race), ref = "Stage IV")Stage I	1.0147	0.365951	2.77279	0.00555779	0.247177
MAP3K13	Colorectal Cancer	factor(sample_subtypes)Rectal Adenocarcinoma	-1.09498	0.395006	-2.77205	0.0055704	0.247189
PREX2	Melanoma	factor(sample_subtypes)Melanoma of Unknown Primary	2.09297	0.755077	2.77186	0.00557369	0.247189
STAG2	Hepatobiliary Cancer	relevel(factor(race), ref = "Stage IV")Stage II/III	4.21821	1.52254	2.7705	0.00559703	0.247876
ACVR1	Colorectal Cancer	relevel(factor(race), ref = "Stage IV")Stage II/III	2.14253	0.773719	2.76913	0.00562066	0.248575
EPHA3	Melanoma	factor(sample_all$sex)Male	0.627305	0.226719	2.76688	0.00565955	0.249945
PIK3C2G	Melanoma	factor(sample_subtypes)Melanoma of Unknown Primary	2.84547	1.02922	2.76469	0.00569768	0.251278
ERF	Pancreatic Cancer	relevel(factor(race), ref = "Stage IV")Stage I	2.36875	0.857078	2.76376	0.00571402	0.251298
RECQL	Colorectal Cancer	factor(sample_subtypes)Rectal Adenocarcinoma	-1.69735	0.614133	-2.76381	0.00571302	0.251298
ERBB4	Bladder Cancer	factor(sample_all$sex)Male	1.6698	0.60437	2.76288	0.00572943	0.251625
PIK3CG	Breast Cancer	factor(sample_subtypes)Breast Invasive Ductal Carcinoma	-2.14722	0.777634	-2.76122	0.00575863	0.251858
FAT1	Melanoma	factor(sample_subtypes)Cutaneous Melanoma	2.79636	1.01265	2.76142	0.00575507	0.251858
MSH3	Colorectal Cancer	relevel(factor(race), ref = "Stage IV")Stage II/III	1.39755	0.50603	2.76179	0.00574846	0.251858
KRAS	Non-Small Cell Lung Cancer	relevel(factor(race), ref = "Stage IV")others	0.616642	0.22344	2.75976	0.00578436	0.252634
ETV6	Non-Small Cell Lung Cancer	factor(sample_all$sex)Male	-1.03671	0.375942	-2.75763	0.0058222	0.253936
GNAS	Colorectal Cancer	factor(sample_subtypes)others	2.22108	0.806006	2.75567	0.00585729	0.254764
PGR	Non-Small Cell Lung Cancer	factor(sample_subtypes)Lung Adenocarcinoma	-1.21044	0.439247	-2.75571	0.00585652	0.254764
RUNX1	Non-Small Cell Lung Cancer	factor(sample_all$sex)Male	0.816083	0.296206	2.75511	0.00586716	0.254843
NOTCH4	Melanoma	factor(sample_subtypes)Cutaneous Melanoma	2.78751	1.01266	2.75266	0.00591124	0.256405
TP53	Esophagogastric Cancer	factor(sample_all$sex)Male	0.462271	0.167975	2.75202	0.0059228	0.256555
TP53	Non-Small Cell Lung Cancer	factor(sample_subtypes)Lung Neuroendocrine Tumor	-1.28484	0.4672	-2.75009	0.00595785	0.25772
WT1	Colorectal Cancer	factor(sample_subtypes)Rectal Adenocarcinoma	-1.3274	0.483137	-2.74747	0.00600572	0.259436
ARAF	Melanoma	factor(sample_all$sex)Male	-1.30756	0.476209	-2.74578	0.00603673	0.260065
MSH6	Colorectal Cancer	relevel(factor(race), ref = "Stage IV")Stage I	0.839568	0.305755	2.74588	0.00603488	0.260065
ARID5B	Colorectal Cancer	factor(sample_subtypes)Rectal Adenocarcinoma	-0.994044	0.362227	-2.74426	0.00606479	0.260918
EGFR	Non-Small Cell Lung Cancer	factor(sample_subtypes)others	1.84297	0.671826	2.74323	0.00608387	0.261029
ATM	Endometrial Cancer	factor(sample_subtypes)Uterine Serous Carcinoma/Uterine Papillary Serous Carcinoma	-2.46068	0.89692	-2.74348	0.00607925	0.261029
NF1	Soft Tissue Sarcoma	factor(sample_subtypes)Undifferentiated Pleomorphic Sarcoma/Malignant Fibrous Histiocytoma/High-Grade Spindle Cell Sarcoma	2.12244	0.773992	2.7422	0.00610297	0.261493
MET	Non-Small Cell Lung Cancer	factor(sample_subtypes)Lung Squamous Cell Carcinoma	-1.24371	0.453745	-2.741	0.00612525	0.262093
BIRC3	Colorectal Cancer	relevel(factor(race), ref = "Stage IV")Stage I	1.36173	0.496934	2.74027	0.00613886	0.26232
TAP1	Colorectal Cancer	factor(sample_subtypes)Rectal Adenocarcinoma	-2.01731	0.736299	-2.7398	0.00614772	0.262344
AKT1	Melanoma	relevel(factor(race), ref = "Stage IV")Stage I	1.7243	0.629971	2.73712	0.00619803	0.263477
PLK2	Colorectal Cancer	relevel(factor(race), ref = "Stage IV")Stage II/III	1.72564	0.630332	2.73767	0.00618759	0.263477
CENPA	Colorectal Cancer	relevel(factor(race), ref = "Stage IV")Stage II/III	3.18063	1.16206	2.73705	0.00619926	0.263477
NBN	Non-Small Cell Lung Cancer	factor(sample_subtypes)Lung Squamous Cell Carcinoma	-2.1235	0.776148	-2.73595	0.00622009	0.264007
PIK3R3	Breast Cancer	factor(sample_all$sex)Male	2.2822	0.834567	2.7346	0.00624569	0.264738
FAT1	Endometrial Cancer	factor(sample_subtypes)Uterine Carcinosarcoma/Uterine Malignant Mixed Mullerian Tumor	-2.07305	0.758291	-2.73384	0.00626002	0.264991
GNAS	Colorectal Cancer	relevel(factor(race), ref = "Stage IV")Stage I	0.943818	0.345613	2.73085	0.00631715	0.266339
APC	Colorectal Cancer	factor(sample_subtypes)others	-1.89412	0.693522	-2.73116	0.00631127	0.266339
TCF7L2	Colorectal Cancer	relevel(factor(race), ref = "Stage IV")Stage I	0.57302	0.209788	2.73142	0.00630624	0.266339
AKT3	Colorectal Cancer	factor(sample_all$sex)Male	0.960836	0.352021	2.72949	0.00634329	0.267085
RPS6KA4	Breast Cancer	factor(sample_all$sex)Male	2.23787	0.820165	2.72856	0.00636117	0.267482
CD79B	Colorectal Cancer	factor(sample_all$sex)Male	1.69994	0.623566	2.72616	0.00640761	0.269022
SETD2	Bladder Cancer	relevel(factor(race), ref = "Stage IV")Stage I	0.80862	0.296683	2.72553	0.0064198	0.269022
LATS1	Colorectal Cancer	factor(sample_subtypes)Rectal Adenocarcinoma	-0.956049	0.350798	-2.72535	0.00642332	0.269022
FBXW7	Ovarian Cancer	relevel(factor(race), ref = "Stage IV")Stage II/III	3.23922	1.18876	2.72487	0.00643269	0.269058
PIK3CA	Esophagogastric Cancer	factor(sample_all$sex)Male	1.03996	0.381836	2.72356	0.00645818	0.269412
TSC1	Non-Small Cell Lung Cancer	relevel(factor(race), ref = "Stage IV")Stage II/III	1.21896	0.447551	2.72362	0.00645708	0.269412
ERBB3	Colorectal Cancer	relevel(factor(race), ref = "Stage IV")Stage II/III	1.23154	0.45228	2.72297	0.00646983	0.269542
FGF3	Bladder Cancer	relevel(factor(race), ref = "Stage IV")Stage II/III	2.31089	0.849653	2.7198	0.00653213	0.271779
AR	Endometrial Cancer	factor(sample_subtypes)Uterine Serous Carcinoma/Uterine Papillary Serous Carcinoma	-2.43961	0.897195	-2.71916	0.00654484	0.271951
EGFR	Bladder Cancer	factor(sample_subtypes)others	2.31416	0.851268	2.71849	0.00655806	0.272142
RRAGC	Non-Small Cell Lung Cancer	relevel(factor(race), ref = "Stage IV")others	2.18843	0.805699	2.71619	0.00660379	0.273681
EP300	Colorectal Cancer	relevel(factor(race), ref = "Stage IV")Stage I	0.773649	0.284986	2.71469	0.00663373	0.274562
RET	Head and Neck Cancer	relevel(factor(race), ref = "Stage IV")others	3.8144	1.40578	2.71338	0.00666007	0.27475
NOTCH3	Melanoma	factor(sample_all$sex)Male	0.555187	0.20466	2.71274	0.00667304	0.27475
ARID5B	Colorectal Cancer	relevel(factor(race), ref = "Stage IV")Stage I	0.994663	0.366544	2.71363	0.00665513	0.27475
ELF3	Breast Cancer	factor(sample_subtypes)Breast Invasive Ductal Carcinoma	-3.1944	1.17745	-2.71298	0.00666806	0.27475
DNMT3A	Bladder Cancer	relevel(factor(race), ref = "Stage IV")Stage I	1.00662	0.3713	2.71106	0.00670676	0.275571
SETD2	Endometrial Cancer	relevel(factor(race), ref = "Stage IV")Stage II/III	1.48531	0.547906	2.71088	0.0067104	0.275571
VHL	Renal Cell Carcinoma	factor(sample_subtypes)Renal Clear Cell Carcinoma	2.99056	1.10341	2.71028	0.0067226	0.275714
TP53	Non-Small Cell Lung Cancer	factor(sample_all$sex)Male	0.156877	0.0579254	2.70827	0.00676359	0.276674
ATRX	Breast Cancer	factor(sample_subtypes)Breast Invasive Ductal Carcinoma	-2.19315	0.809747	-2.70844	0.00676011	0.276674
ETV6	Head and Neck Cancer	relevel(factor(race), ref = "Stage IV")Stage I	3.60454	1.33126	2.70761	0.00677699	0.276674
HGF	Colorectal Cancer	factor(sample_all$sex)Male	0.669704	0.247399	2.70698	0.00678975	0.276674
EPHA7	Melanoma	factor(sample_subtypes)Cutaneous Melanoma	2.74373	1.01351	2.70716	0.00678611	0.276674
NF2	Bladder Cancer	factor(aya_status)1	1.81655	0.67171	2.70436	0.0068436	0.278509
BLM	Colorectal Cancer	factor(sample_subtypes)Rectal Adenocarcinoma	-0.935324	0.345962	-2.70354	0.00686048	0.278837
ERBB2	Colorectal Cancer	factor(aya_status)1	0.572877	0.212218	2.69948	0.00694486	0.281904
XIAP	Colorectal Cancer	factor(aya_status)1	1.14637	0.425008	2.69728	0.00699093	0.283411
MSH2	Colorectal Cancer	relevel(factor(race), ref = "Stage IV")others	1.14899	0.426256	2.69553	0.00702777	0.283986
ICOSLG	Colorectal Cancer	relevel(factor(race), ref = "Stage IV")Stage I	1.33608	0.495585	2.69597	0.00701834	0.283986
CSDE1	Endometrial Cancer	factor(sample_subtypes)Uterine Carcinosarcoma/Uterine Malignant Mixed Mullerian Tumor	-3.41713	1.2678	-2.69532	0.00703208	0.283986
EPHA5	Non-Small Cell Lung Cancer	relevel(factor(race), ref = "Stage IV")Stage I	-0.685379	0.25439	-2.6942	0.00705574	0.284207
PRKCI	Melanoma	relevel(factor(race), ref = "Stage IV")Stage II/III	1.92401	0.714222	2.69386	0.00706302	0.284207
ANKRD11	Non-Small Cell Lung Cancer	relevel(factor(race), ref = "Stage IV")others	1.18464	0.439769	2.69379	0.0070645	0.284207
SMAD4	Colorectal Cancer	factor(sample_subtypes)Colorectal Adenocarcinoma	0.354689	0.131815	2.69081	0.00712795	0.286395
TP53	Colorectal Cancer	factor(sample_subtypes)others	-1.86221	0.69233	-2.68977	0.00715005	0.286919
FLT4	Non-Small Cell Lung Cancer	factor(sample_subtypes)Lung Squamous Cell Carcinoma	-1.21073	0.450257	-2.68896	0.00716743	0.287251
IRF4	Colorectal Cancer	relevel(factor(race), ref = "Stage IV")Stage II/III	1.67451	0.622939	2.68808	0.00718651	0.287652
FBXW7	Bladder Cancer	relevel(factor(race), ref = "Stage IV")Stage I	0.648422	0.241446	2.68558	0.00724035	0.28944
FGFR4	Endometrial Cancer	factor(sample_subtypes)Uterine Carcinosarcoma/Uterine Malignant Mixed Mullerian Tumor	-2.60501	0.970182	-2.68508	0.0072513	0.289512
KMT2D	Endometrial Cancer	factor(sample_subtypes)Uterine Carcinosarcoma/Uterine Malignant Mixed Mullerian Tumor	-2.03512	0.758201	-2.68414	0.00727166	0.289959
DIS3	Non-Small Cell Lung Cancer	factor(sample_all$sex)Male	0.563735	0.210077	2.68347	0.00728616	0.290171
ROS1	Melanoma	factor(aya_status)1	-0.899992	0.335532	-2.68228	0.00731216	0.29084
CTNNB1	Endometrial Cancer	factor(sample_subtypes)Uterine Carcinosarcoma/Uterine Malignant Mixed Mullerian Tumor	-2.6013	0.970332	-2.68083	0.00734392	0.291722
DDR2	Colorectal Cancer	relevel(factor(race), ref = "Stage IV")Stage I	1.11397	0.415622	2.68024	0.0073569	0.291722
EZH2	Breast Cancer	factor(sample_all$sex)Male	2.21752	0.827491	2.67981	0.00736633	0.291722
MSH3	Non-Small Cell Lung Cancer	factor(sample_subtypes)Lung Adenocarcinoma	-1.67371	0.624615	-2.67959	0.00737124	0.291722
NCOA3	Melanoma	factor(sample_all$sex)Male	0.915902	0.342004	2.67804	0.00740535	0.292706
APC	Hepatobiliary Cancer	relevel(factor(race), ref = "Stage IV")Stage I	1.26174	0.471302	2.67715	0.00742523	0.293125
FOXA1	Breast Cancer	factor(aya_status)1	-1.91735	0.716323	-2.67666	0.00743598	0.293183
CDKN2A	Hepatobiliary Cancer	factor(sample_subtypes)Intrahepatic Cholangiocarcinoma	-1.27718	0.477426	-2.67514	0.00746984	0.293892
RET	Breast Cancer	factor(sample_all$sex)Male	2.16274	0.808546	2.67485	0.00747629	0.293892
HIST1H3H	Bladder Cancer	factor(sample_subtypes)others	3.11417	1.16435	2.6746	0.00748182	0.293892
ARID1B	Hepatobiliary Cancer	relevel(factor(race), ref = "Stage IV")others	1.82221	0.681481	2.6739	0.00749755	0.294144
ASXL1	Colorectal Cancer	factor(sample_subtypes)Rectal Adenocarcinoma	-0.621227	0.232684	-2.66984	0.00758881	0.296987
MSH3	Endometrial Cancer	factor(sample_subtypes)Uterine Carcinosarcoma/Uterine Malignant Mixed Mullerian Tumor	-3.38471	1.26765	-2.67007	0.00758354	0.296987
PTCH1	Breast Cancer	factor(sample_all$sex)Male	2.15474	0.807379	2.66881	0.00761212	0.297411
BLM	Head and Neck Cancer	relevel(factor(race), ref = "Stage IV")Stage I	2.97497	1.11484	2.66853	0.00761844	0.297411
IGF1	Colorectal Cancer	relevel(factor(race), ref = "Stage IV")Stage I	1.48683	0.557258	2.66811	0.00762786	0.297411
CTNNB1	Breast Cancer	factor(sample_subtypes)Breast Invasive Ductal Carcinoma	-2.93533	1.10079	-2.66657	0.00766292	0.29752
BRCA2	Endometrial Cancer	factor(sample_subtypes)Uterine Carcinosarcoma/Uterine Malignant Mixed Mullerian Tumor	-2.5834	0.968895	-2.66634	0.00766827	0.29752
KEAP1	Non-Small Cell Lung Cancer	factor(aya_status)1	-1.91266	0.717273	-2.66657	0.00766301	0.29752
AXIN1	Esophagogastric Cancer	relevel(factor(race), ref = "Stage IV")others	1.85993	0.697532	2.66644	0.00766588	0.29752
MYCN	Non-Small Cell Lung Cancer	factor(sample_all$sex)Male	0.816922	0.30646	2.66568	0.00768338	0.29774
GATA3	Breast Cancer	relevel(factor(race), ref = "Stage IV")Stage II/III	-0.71756	0.269388	-2.66367	0.00772945	0.298428
FYN	Melanoma	relevel(factor(race), ref = "Stage IV")Stage I	1.82546	0.685216	2.66407	0.00772026	0.298428
INPPL1	Colorectal Cancer	factor(sample_subtypes)Rectal Adenocarcinoma	-0.787896	0.295729	-2.66425	0.00771605	0.298428
DDR2	Colorectal Cancer	factor(aya_status)1	0.852749	0.320321	2.66217	0.0077639	0.298448
BAP1	Colorectal Cancer	relevel(factor(race), ref = "Stage IV")Stage I	1.10444	0.414889	2.662	0.0077677	0.298448
MRE11A	Bladder Cancer	relevel(factor(race), ref = "Stage IV")others	1.87976	0.706081	2.66225	0.00776196	0.298448
STAT5B	Colorectal Cancer	relevel(factor(race), ref = "Stage IV")Stage II/III	1.67289	0.628212	2.66294	0.00774613	0.298448
FBXW7	Bladder Cancer	relevel(factor(race), ref = "Stage IV")others	0.938265	0.352539	2.66145	0.00778044	0.298574
ROS1	Colorectal Cancer	factor(sample_subtypes)Colorectal Adenocarcinoma	-0.991521	0.372668	-2.6606	0.00780011	0.298966
EPHA5	Colorectal Cancer	relevel(factor(race), ref = "Stage IV")Stage I	0.733234	0.275802	2.65855	0.00784781	0.300067
POLE	Head and Neck Cancer	relevel(factor(race), ref = "Stage IV")Stage II/III	2.45563	0.923554	2.65889	0.00783985	0.300067
KDM5C	Colorectal Cancer	factor(aya_status)1	0.734579	0.276469	2.65701	0.00788374	0.301077
PIK3CD	Esophagogastric Cancer	factor(sample_all$sex)Male	-1.68237	0.633683	-2.65491	0.00793298	0.302592
RNF43	Colorectal Cancer	factor(sample_all$sex)Male	-0.322421	0.121508	-2.6535	0.00796617	0.303492
RPS6KA4	Colorectal Cancer	relevel(factor(race), ref = "Stage IV")Stage I	0.915925	0.34528	2.6527	0.00798507	0.303846
DDR2	Colorectal Cancer	relevel(factor(race), ref = "Stage IV")Stage II/III	1.66093	0.626598	2.65071	0.00803233	0.305277
PBRM1	Colorectal Cancer	relevel(factor(race), ref = "Stage IV")Stage I	0.837715	0.316095	2.6502	0.00804447	0.305371
CBL	Colorectal Cancer	relevel(factor(race), ref = "Stage IV")Stage I	1.18833	0.448481	2.64969	0.00805665	0.305467
ZFHX3	Non-Small Cell Lung Cancer	factor(sample_subtypes)Lung Adenocarcinoma	-0.960608	0.362735	-2.64823	0.00809134	0.306415
FYN	Colorectal Cancer	relevel(factor(race), ref = "Stage IV")Stage I	1.19006	0.449589	2.647	0.00812104	0.306805
STAT5A	Melanoma	relevel(factor(race), ref = "Stage IV")Stage I	1.91958	0.725136	2.6472	0.00811615	0.306805
FBXW7	Non-Small Cell Lung Cancer	factor(sample_subtypes)Lung Adenocarcinoma	-1.26547	0.478696	-2.64357	0.0082037	0.308404
LMO1	Melanoma	relevel(factor(race), ref = "Stage IV")Stage II/III	2.36045	0.892927	2.64349	0.00820557	0.308404
EPHA7	Melanoma	factor(sample_subtypes)Melanoma of Unknown Primary	2.72162	1.02966	2.64322	0.00821215	0.308404
NTHL1	Colorectal Cancer	relevel(factor(race), ref = "Stage IV")others	2.16637	0.819463	2.64365	0.00820183	0.308404
RPS6KA4	Endometrial Cancer	factor(sample_subtypes)Uterine Carcinosarcoma/Uterine Malignant Mixed Mullerian Tumor	-2.56265	0.969227	-2.64401	0.00819295	0.308404
KDM5C	Non-Small Cell Lung Cancer	factor(sample_subtypes)Lung Squamous Cell Carcinoma	-1.58242	0.59961	-2.63908	0.00831312	0.311826
BRAF	Melanoma	factor(aya_status)1	0.611362	0.231716	2.63841	0.0083297	0.312025
STAT5A	Ovarian Cancer	relevel(factor(race), ref = "Stage IV")others	2.31458	0.877379	2.63806	0.00833816	0.312025
TP53	Melanoma	factor(sample_subtypes)Uveal Melanoma	-2.80094	1.06319	-2.63448	0.00842652	0.313108
NOTCH1	Colorectal Cancer	factor(sample_subtypes)Rectal Adenocarcinoma	-0.551104	0.209093	-2.63569	0.00839669	0.313108
SF3B1	Colorectal Cancer	relevel(factor(race), ref = "Stage IV")Stage I	1.02228	0.387943	2.63512	0.00841078	0.313108
SPOP	Colorectal Cancer	relevel(factor(race), ref = "Stage IV")Stage I	1.47642	0.560254	2.63527	0.00840707	0.313108
PIK3CB	Colorectal Cancer	relevel(factor(race), ref = "Stage IV")Stage I	1.01789	0.386362	2.63455	0.00842491	0.313108
WHSC1L1	Colorectal Cancer	relevel(factor(race), ref = "Stage IV")Stage I	1.0336	0.392284	2.63483	0.00841798	0.313108
ARID1B	Colorectal Cancer	relevel(factor(race), ref = "Stage IV")Stage II/III	1.28877	0.489315	2.63383	0.00844277	0.313141
LATS1	Head and Neck Cancer	relevel(factor(race), ref = "Stage IV")Stage I	2.70723	1.02794	2.63365	0.00844722	0.313141
PLK2	Colorectal Cancer	factor(aya_status)1	0.812157	0.308468	2.63287	0.00846666	0.313495
INPP4A	Colorectal Cancer	relevel(factor(race), ref = "Stage IV")Stage I	1.01748	0.386578	2.63201	0.0084881	0.313921
ERBB2	Hepatobiliary Cancer	factor(sample_subtypes)Intrahepatic Cholangiocarcinoma	-1.46629	0.55757	-2.62979	0.00854376	0.31561
MAP3K1	Hepatobiliary Cancer	factor(sample_subtypes)others	2.99331	1.13946	2.62694	0.00861561	0.317893
DNMT3A	Bladder Cancer	factor(sample_subtypes)Upper Tract Urothelial Carcinoma	0.950555	0.362067	2.62535	0.00865591	0.317896
FLT4	Renal Cell Carcinoma	relevel(factor(race), ref = "Stage IV")Stage I	2.20165	0.83857	2.62549	0.0086525	0.317896
GLI1	Colorectal Cancer	factor(sample_subtypes)Rectal Adenocarcinoma	-0.668057	0.254393	-2.62608	0.00863747	0.317896
STAT5B	Colorectal Cancer	factor(sample_subtypes)Rectal Adenocarcinoma	-1.0925	0.416031	-2.62601	0.00863916	0.317896
AR	Melanoma	relevel(factor(race), ref = "Stage IV")Stage I	1.21031	0.46127	2.62386	0.00869403	0.318926
BRCA1	Colorectal Cancer	factor(aya_status)1	0.684417	0.261036	2.62192	0.00874359	0.319263
TSC1	Endometrial Cancer	factor(sample_subtypes)Uterine Carcinosarcoma/Uterine Malignant Mixed Mullerian Tumor	-2.54056	0.968972	-2.62192	0.00874363	0.319263
NOTCH3	Esophagogastric Cancer	relevel(factor(race), ref = "Stage IV")Stage II/III	1.77362	0.676427	2.62204	0.0087406	0.319263
PTPRS	Bladder Cancer	factor(sample_subtypes)Upper Tract Urothelial Carcinoma	0.80757	0.307944	2.62246	0.00872987	0.319263
ALK	Melanoma	factor(aya_status)1	-1.56812	0.598288	-2.62101	0.00876704	0.319749
EED	Bladder Cancer	relevel(factor(race), ref = "Stage IV")others	1.85585	0.708236	2.62039	0.00878292	0.319959
XPO1	Non-Small Cell Lung Cancer	factor(sample_all$sex)Male	0.726098	0.277322	2.61824	0.00883835	0.321238
PIK3R3	Colorectal Cancer	relevel(factor(race), ref = "Stage IV")Stage I	1.46016	0.557616	2.61859	0.00882952	0.321238
RPTOR	Bladder Cancer	factor(aya_status)1	1.71901	0.656678	2.61774	0.00885149	0.321347
SMAD4	Non-Small Cell Lung Cancer	factor(sample_all$sex)Male	-0.414538	0.158461	-2.61602	0.00889611	0.32236
NOTCH4	Melanoma	factor(aya_status)1	-1.37022	0.523808	-2.61588	0.0088998	0.32236
GRIN2A	Melanoma	factor(aya_status)1	-0.850161	0.325116	-2.61495	0.00892406	0.322775
HLA-A	Colorectal Cancer	relevel(factor(race), ref = "Stage IV")Stage II/III	1.6412	0.627693	2.61466	0.00893167	0.322775
ATM	Renal Cell Carcinoma	factor(aya_status)1	1.91682	0.73334	2.61382	0.00895352	0.322904
RFWD2	Non-Small Cell Lung Cancer	factor(sample_all$sex)Male	0.59448	0.227444	2.61374	0.00895566	0.322904
NF2	Non-Small Cell Lung Cancer	factor(sample_all$sex)Male	0.72271	0.276587	2.61296	0.00897617	0.322981
CDKN1A	Breast Cancer	factor(sample_all$sex)Male	2.97738	1.13967	2.61249	0.00898844	0.322981
ZFHX3	Head and Neck Cancer	relevel(factor(race), ref = "Stage IV")others	2.69903	1.03298	2.61285	0.00897905	0.322981
NCOR1	Ovarian Cancer	factor(sample_subtypes)High-Grade Serous Ovarian Cancer	-1.51316	0.579367	-2.61175	0.00900806	0.323319
CDKN2B	Endometrial Cancer	factor(sample_subtypes)Uterine Endometrioid Carcinoma	-3.77589	1.44672	-2.60997	0.009055	0.324635
ARID2	Hepatobiliary Cancer	factor(sample_subtypes)others	2.62393	1.00572	2.609	0.00908069	0.325187
PTPRS	Esophagogastric Cancer	relevel(factor(race), ref = "Stage IV")Stage II/III	1.52013	0.583201	2.60653	0.00914661	0.326808
RPS6KB2	Breast Cancer	factor(sample_subtypes)Breast Invasive Ductal Carcinoma	-2.86436	1.0989	-2.60656	0.00914562	0.326808
DNMT3A	Colorectal Cancer	relevel(factor(race), ref = "Stage IV")Stage I	0.949308	0.364277	2.60601	0.00916051	0.326935
ASXL2	Melanoma	factor(sample_all$sex)Male	0.801766	0.307737	2.60536	0.00917785	0.327185
KMT2A	Head and Neck Cancer	relevel(factor(race), ref = "Stage IV")Stage I	2.06663	0.794478	2.60125	0.0092886	0.330388
INHBA	Melanoma	factor(sample_all$sex)Male	0.812028	0.312153	2.60138	0.00928504	0.330388
BLM	Bladder Cancer	relevel(factor(race), ref = "Stage IV")Stage I	0.923253	0.355013	2.60062	0.00930564	0.330622
SOX9	Ovarian Cancer	factor(sample_subtypes)High-Grade Serous Ovarian Cancer	-2.27097	0.873429	-2.60006	0.00932066	0.330784
RBM10	Non-Small Cell Lung Cancer	factor(sample_subtypes)Lung Squamous Cell Carcinoma	-1.08149	0.416252	-2.59816	0.00937237	0.331874
DNMT1	Melanoma	relevel(factor(race), ref = "Stage IV")Stage I	1.37868	0.530628	2.5982	0.00937149	0.331874
BRD4	Colorectal Cancer	relevel(factor(race), ref = "Stage IV")Stage I	0.855009	0.329276	2.59663	0.00941428	0.332985
PTPN11	Bladder Cancer	factor(sample_subtypes)others	3.09557	1.19278	2.59525	0.00945213	0.333578
AURKB	Colorectal Cancer	relevel(factor(race), ref = "Stage IV")Stage I	1.45031	0.558784	2.59548	0.00944584	0.333578
FGFR3	Bladder Cancer	factor(sample_all$sex)Male	-0.374515	0.144449	-2.59271	0.00952226	0.335678
CDC73	Colorectal Cancer	relevel(factor(race), ref = "Stage IV")Stage I	1.07131	0.413391	2.59151	0.00955546	0.336473
NOTCH2	Melanoma	factor(sample_all$sex)Male	0.754093	0.291127	2.59025	0.00959056	0.336959
CENPA	Non-Small Cell Lung Cancer	factor(sample_subtypes)Lung Adenocarcinoma	-1.99433	0.769936	-2.59026	0.00959048	0.336959
BRIP1	Colorectal Cancer	relevel(factor(race), ref = "Stage IV")Stage I	1.07153	0.413753	2.58977	0.009604	0.337057
PBRM1	Renal Cell Carcinoma	factor(aya_status)1	-1.46761	0.56685	-2.58906	0.0096237	0.337374
PTEN	Endometrial Cancer	factor(sample_subtypes)Uterine Carcinosarcoma/Uterine Malignant Mixed Mullerian Tumor	-1.61083	0.622641	-2.5871	0.00967886	0.338557
MAP2K4	Esophagogastric Cancer	relevel(factor(race), ref = "Stage IV")Stage II/III	2.18691	0.845207	2.58743	0.00966962	0.338557
KDM5C	Colorectal Cancer	relevel(factor(race), ref = "Stage IV")Stage I	0.94134	0.363966	2.58634	0.00970008	0.338675
EPHA5	Colorectal Cancer	relevel(factor(race), ref = "Stage IV")Stage II/III	1.16709	0.451273	2.58621	0.00970365	0.338675
ALK	Colorectal Cancer	factor(sample_subtypes)Colorectal Adenocarcinoma	-0.8272	0.320167	-2.58365	0.00977603	0.339824
ERCC2	Bladder Cancer	factor(sample_all$sex)Male	0.6441	0.24925	2.58416	0.00976177	0.339824
NOTCH4	Non-Small Cell Lung Cancer	factor(sample_subtypes)Lung Adenocarcinoma	-0.982799	0.380407	-2.58355	0.00977906	0.339824
KMT2B	Colorectal Cancer	factor(sample_subtypes)Rectal Adenocarcinoma	-0.506029	0.195868	-2.58353	0.00977958	0.339824
MYC	Colorectal Cancer	factor(sample_subtypes)others	2.8376	1.09905	2.58187	0.00982676	0.341089
PIK3C2G	Non-Small Cell Lung Cancer	factor(sample_all$sex)Male	0.39952	0.154793	2.581	0.00985136	0.341568
CSF3R	Pancreatic Cancer	relevel(factor(race), ref = "Stage IV")others	2.08308	0.807377	2.58005	0.00987853	0.342135
PIK3CD	Colorectal Cancer	factor(sample_subtypes)Rectal Adenocarcinoma	-0.935061	0.362512	-2.57939	0.00989743	0.342414
ARID1B	Colorectal Cancer	factor(sample_subtypes)Rectal Adenocarcinoma	-0.566325	0.219625	-2.5786	0.0099202	0.342827
NEGR1	Non-Small Cell Lung Cancer	factor(sample_subtypes)Lung Adenocarcinoma	-1.38214	0.536233	-2.57751	0.00995159	0.343536
CBL	Breast Cancer	factor(sample_all$sex)Male	2.09394	0.812939	2.57577	0.0100018	0.344892
KDM6A	Colorectal Cancer	factor(sample_subtypes)Rectal Adenocarcinoma	-0.858739	0.333618	-2.57402	0.0100525	0.346262
BRAF	Breast Cancer	factor(sample_subtypes)Breast Invasive Ductal Carcinoma	-2.81534	1.09461	-2.572	0.0101112	0.347681
RARA	Colorectal Cancer	factor(aya_status)1	0.897687	0.349094	2.57148	0.0101266	0.347681
NEGR1	Head and Neck Cancer	relevel(factor(race), ref = "Stage IV")Stage I	2.59512	1.00918	2.57151	0.0101255	0.347681
EPHA5	Non-Small Cell Lung Cancer	factor(sample_subtypes)Lung Squamous Cell Carcinoma	-0.888824	0.345779	-2.5705	0.0101552	0.348284
MAP3K1	Bladder Cancer	relevel(factor(race), ref = "Stage IV")Stage I	1.10293	0.429304	2.56911	0.0101961	0.349307
ARID1A	Breast Cancer	relevel(factor(race), ref = "Stage IV")Stage I	-0.671902	0.261687	-2.56758	0.010241	0.350088
GLI1	Bladder Cancer	factor(aya_status)1	1.73781	0.676774	2.56779	0.010235	0.350088
MTOR	Melanoma	factor(sample_all$sex)Male	0.713778	0.27812	2.56644	0.0102749	0.350111
ERCC4	Colorectal Cancer	factor(sample_subtypes)Rectal Adenocarcinoma	-1.39178	0.542271	-2.56657	0.010271	0.350111
PTPRD	Esophagogastric Cancer	factor(sample_subtypes)Stomach Adenocarcinoma	-1.2268	0.4779	-2.56707	0.0102562	0.350111
ESR1	Breast Cancer	factor(aya_status)1	-0.729976	0.284511	-2.56572	0.0102961	0.350455
BRCA2	Colorectal Cancer	relevel(factor(race), ref = "Stage IV")Stage I	0.707006	0.275611	2.56523	0.0103107	0.350575
MTOR	Colorectal Cancer	factor(sample_subtypes)Rectal Adenocarcinoma	-0.563728	0.219798	-2.56476	0.0103249	0.350679
MAP2K4	Colorectal Cancer	relevel(factor(race), ref = "Stage IV")Stage I	0.931787	0.363414	2.56398	0.0103478	0.351083
AXL	Colorectal Cancer	factor(sample_subtypes)Rectal Adenocarcinoma	-0.691327	0.269752	-2.56282	0.0103825	0.351881
POLD1	Pancreatic Cancer	relevel(factor(race), ref = "Stage IV")Stage I	2.02412	0.789933	2.5624	0.0103952	0.351934
POLD1	Bladder Cancer	factor(sample_subtypes)Upper Tract Urothelial Carcinoma	0.971125	0.379186	2.56108	0.0104347	0.352894
MYCL	Pancreatic Cancer	relevel(factor(race), ref = "Stage IV")Stage I	2.11962	0.828222	2.55924	0.0104902	0.354393
TP53	Head and Neck Cancer	factor(sample_subtypes)Larynx Squamous Cell Carcinoma	1.27258	0.497393	2.5585	0.0105125	0.354765
CALR	Colorectal Cancer	factor(sample_subtypes)others	2.99465	1.17125	2.55679	0.0105642	0.356132
MAPK3	Bladder Cancer	factor(sample_subtypes)others	2.937	1.14955	2.55491	0.0106215	0.35768
EIF1AX	Melanoma	factor(sample_all$sex)Male	1.08815	0.42598	2.55447	0.0106349	0.357752
PIK3CB	Colorectal Cancer	relevel(factor(race), ref = "Stage IV")Stage II/III	1.58309	0.62016	2.55272	0.0106886	0.359177
CXCR4	Non-Small Cell Lung Cancer	factor(sample_all$sex)Male	-1.31862	0.516696	-2.55202	0.0107101	0.359515
KMT2D	Esophagogastric Cancer	factor(sample_subtypes)Esophagogastric Adenocarcinoma	1.44531	0.566434	2.55159	0.0107231	0.359571
FAT1	Thyroid Cancer	factor(sample_subtypes)Papillary Thyroid Cancer	-3.56753	1.39842	-2.55112	0.0107377	0.35968
DNMT3B	Non-Small Cell Lung Cancer	factor(sample_subtypes)Lung Adenocarcinoma	-1.36092	0.533849	-2.54926	0.010795	0.361217
SMARCD1	Colorectal Cancer	relevel(factor(race), ref = "Stage IV")others	1.64579	0.645846	2.54826	0.010826	0.361871
STAT5A	Colorectal Cancer	factor(aya_status)1	0.932281	0.366061	2.54679	0.0108717	0.363015
GATA3	Colorectal Cancer	relevel(factor(race), ref = "Stage IV")Stage I	0.978668	0.384938	2.54241	0.0110092	0.364173
CARD11	Colorectal Cancer	factor(aya_status)1	0.52048	0.204742	2.54212	0.0110181	0.364173
JAK1	Non-Small Cell Lung Cancer	factor(sample_all$sex)Male	0.693773	0.272927	2.54197	0.0110229	0.364173
WHSC1	Colorectal Cancer	relevel(factor(race), ref = "Stage IV")Stage II/III	1.63086	0.640985	2.5443	0.0109496	0.364173
YAP1	Melanoma	relevel(factor(race), ref = "Stage IV")Stage I	3.36221	1.32302	2.54131	0.0110439	0.364173
MAX	Non-Small Cell Lung Cancer	factor(sample_subtypes)Lung Squamous Cell Carcinoma	-2.95314	1.16148	-2.54258	0.0110039	0.364173
DNMT1	Non-Small Cell Lung Cancer	factor(sample_subtypes)Lung Squamous Cell Carcinoma	-1.57214	0.618451	-2.54206	0.01102	0.364173
PTPRS	Non-Small Cell Lung Cancer	factor(sample_subtypes)Lung Adenocarcinoma	-1.21118	0.476523	-2.54172	0.011031	0.364173
PTPRS	Head and Neck Cancer	relevel(factor(race), ref = "Stage IV")Stage I	2.56165	1.00662	2.54481	0.0109337	0.364173
AGO2	Colorectal Cancer	factor(sample_subtypes)Rectal Adenocarcinoma	-1.07108	0.421471	-2.54128	0.0110446	0.364173
INPPL1	Colorectal Cancer	relevel(factor(race), ref = "Stage IV")Stage II/III	1.40898	0.554271	2.54205	0.0110205	0.364173
RECQL	Colorectal Cancer	relevel(factor(race), ref = "Stage IV")Stage II/III	1.92981	0.758756	2.54338	0.0109786	0.364173
GLI1	Non-Small Cell Lung Cancer	factor(sample_subtypes)Lung Squamous Cell Carcinoma	-1.33256	0.52463	-2.54	0.0110853	0.365134
HRAS	Bladder Cancer	relevel(factor(race), ref = "Stage IV")Stage I	0.81818	0.322192	2.53941	0.0111039	0.365365
PRDM14	Colorectal Cancer	factor(sample_subtypes)Rectal Adenocarcinoma	-1.87423	0.739399	-2.53481	0.011251	0.36982
EPCAM	Endometrial Cancer	factor(aya_status)1	2.15078	0.849484	2.53186	0.0113458	0.37255
PIK3R3	Endometrial Cancer	factor(sample_subtypes)Uterine Endometrioid Carcinoma	-2.09711	0.828508	-2.53118	0.0113678	0.372886
RAD21	Non-Small Cell Lung Cancer	factor(sample_subtypes)Lung Adenocarcinoma	-1.56963	0.62024	-2.53068	0.0113842	0.373035
AXIN2	Hepatobiliary Cancer	relevel(factor(race), ref = "Stage IV")others	2.13076	0.84215	2.53014	0.0114018	0.373226
PBRM1	Head and Neck Cancer	relevel(factor(race), ref = "Stage IV")Stage I	2.46935	0.976274	2.52936	0.0114269	0.373662
SMO	Bladder Cancer	relevel(factor(race), ref = "Stage IV")Stage I	1.42401	0.56344	2.52735	0.0114926	0.375033
ZFHX3	Colorectal Cancer	relevel(factor(race), ref = "Stage IV")Stage II/III	1.07788	0.426466	2.52746	0.0114892	0.375033
TP53	Ovarian Cancer	factor(sample_subtypes)Low-Grade Serous Ovarian Cancer	-2.6528	1.05055	-2.52517	0.0115644	0.376987
RNF43	Bladder Cancer	relevel(factor(race), ref = "Stage IV")Stage II/III	1.67484	0.663461	2.52439	0.0115899	0.377293
NOTCH4	Melanoma	factor(sample_subtypes)Melanoma of Unknown Primary	2.60431	1.03175	2.52416	0.0115976	0.377293
EIF4A2	Colorectal Cancer	factor(aya_status)1	1.1206	0.444093	2.52334	0.0116247	0.377784
PIK3CD	Non-Small Cell Lung Cancer	factor(sample_subtypes)Lung Squamous Cell Carcinoma	-1.8079	0.716954	-2.52164	0.011681	0.379225
CDK12	Colorectal Cancer	relevel(factor(race), ref = "Stage IV")Stage II/III	1.36329	0.540792	2.52092	0.011705	0.379346
CRLF2	Bladder Cancer	relevel(factor(race), ref = "Stage IV")others	2.33649	0.926884	2.5208	0.0117087	0.379346
AKT1	Non-Small Cell Lung Cancer	relevel(factor(race), ref = "Stage IV")others	1.55152	0.616349	2.51727	0.0118269	0.381193
NPM1	Melanoma	relevel(factor(race), ref = "Stage IV")Stage I	1.83005	0.727199	2.51658	0.0118501	0.381193
MYC	Ovarian Cancer	factor(aya_status)1	2.86064	1.13664	2.51675	0.0118442	0.381193
IKZF1	Colorectal Cancer	factor(sample_subtypes)Rectal Adenocarcinoma	-0.665607	0.264405	-2.51738	0.0118232	0.381193
TMPRSS2	Breast Cancer	factor(sample_all$sex)Male	2.25699	0.896367	2.51793	0.0118047	0.381193
ERCC4	Bladder Cancer	relevel(factor(race), ref = "Stage IV")Stage I	1.08329	0.430458	2.5166	0.0118493	0.381193
FAT1	Head and Neck Cancer	factor(sample_subtypes)Oropharynx Squamous Cell Carcinoma	-1.07683	0.427686	-2.5178	0.0118092	0.381193
SMAD4	Non-Small Cell Lung Cancer	relevel(factor(race), ref = "Stage IV")Stage I	-0.826525	0.328513	-2.51595	0.011871	0.381406
ELF3	Hepatobiliary Cancer	factor(sample_subtypes)Hepatocellular Carcinoma	-2.75979	1.09704	-2.51566	0.0118809	0.381406
FAT1	Breast Cancer	relevel(factor(race), ref = "Stage IV")Stage I	-1.0742	0.427141	-2.51486	0.0119079	0.381588
DNMT1	Colorectal Cancer	factor(sample_subtypes)Rectal Adenocarcinoma	-0.693108	0.275614	-2.51478	0.0119107	0.381588
ERBB2	Hepatobiliary Cancer	factor(sample_subtypes)Hepatocellular Carcinoma	-2.80724	1.11824	-2.51042	0.0120587	0.385041
PTEN	Thyroid Cancer	factor(sample_subtypes)Papillary Thyroid Cancer	-3.19472	1.27243	-2.51073	0.0120483	0.385041
GRIN2A	Melanoma	factor(sample_subtypes)others	1.6833	0.67059	2.51017	0.0120671	0.385041
HLA-A	Non-Small Cell Lung Cancer	factor(sample_all$sex)Male	0.863675	0.343986	2.51078	0.0120464	0.385041
CSF3R	Colorectal Cancer	factor(sample_all$sex)Male	0.638536	0.254445	2.50952	0.0120895	0.385365
GNAS	Non-Small Cell Lung Cancer	factor(aya_status)1	1.33121	0.530602	2.50886	0.0121121	0.385696
RECQL4	Colorectal Cancer	relevel(factor(race), ref = "Stage IV")Stage I	0.864104	0.344572	2.50776	0.0121498	0.386121
WHSC1L1	Colorectal Cancer	relevel(factor(race), ref = "Stage IV")Stage II/III	1.60077	0.638285	2.50793	0.0121442	0.386121
ESR1	Colorectal Cancer	relevel(factor(race), ref = "Stage IV")Stage II/III	1.35894	0.542013	2.5072	0.0121691	0.386343
NOTCH4	Non-Small Cell Lung Cancer	factor(sample_subtypes)Lung Squamous Cell Carcinoma	-1.11695	0.445606	-2.50659	0.0121902	0.386627
RB1	Breast Cancer	factor(sample_subtypes)Breast Invasive Lobular Carcinoma	-2.1208	0.846934	-2.50409	0.0122768	0.388593
CHEK2	Breast Cancer	factor(sample_subtypes)Breast Invasive Ductal Carcinoma	-2.73379	1.09161	-2.50437	0.0122668	0.388593
IRF4	Breast Cancer	factor(sample_subtypes)Breast Invasive Ductal Carcinoma	-2.73568	1.09277	-2.50343	0.0122996	0.388926
CEBPA	Bladder Cancer	relevel(factor(race), ref = "Stage IV")Stage II/III	2.1002	0.83907	2.50301	0.0123142	0.388999
SOX2	Non-Small Cell Lung Cancer	factor(sample_subtypes)Lung Adenocarcinoma	-1.55054	0.619568	-2.50261	0.0123282	0.389052
ERCC2	Colorectal Cancer	factor(sample_subtypes)Rectal Adenocarcinoma	-1.20801	0.48282	-2.50198	0.01235	0.389351
NRAS	Ovarian Cancer	factor(sample_subtypes)Low-Grade Serous Ovarian Cancer	2.63039	1.05159	2.50135	0.0123722	0.389479
MDM2	Non-Small Cell Lung Cancer	factor(sample_all$sex)Male	0.812249	0.324749	2.50116	0.0123787	0.389479
RHOA	Esophagogastric Cancer	factor(sample_subtypes)Stomach Adenocarcinoma	2.5778	1.03079	2.5008	0.0123914	0.389492
TP53	Colorectal Cancer	relevel(factor(race), ref = "Stage IV")Stage II/III	-0.7927	0.317069	-2.50009	0.0124162	0.389498
JAK1	Thyroid Cancer	factor(sample_subtypes)Poorly Differentiated Thyroid Cancer	-2.53151	1.01247	-2.50032	0.0124082	0.389498
MDM2	Breast Cancer	factor(sample_subtypes)Breast Invasive Ductal Carcinoma	-2.71482	1.08706	-2.4974	0.0125107	0.392074
AXIN1	Colorectal Cancer	relevel(factor(race), ref = "Stage IV")Stage I	0.906262	0.363152	2.49554	0.0125764	0.39374
PARK2	Colorectal Cancer	factor(sample_all$sex)Male	0.67835	0.271865	2.49517	0.0125895	0.393762
BRCA2	Hepatobiliary Cancer	factor(sample_subtypes)Intrahepatic Cholangiocarcinoma	-1.55027	0.621848	-2.493	0.0126669	0.395789
WHSC1	Colorectal Cancer	factor(sample_subtypes)Rectal Adenocarcinoma	-1.11637	0.448006	-2.49185	0.0127078	0.396677
TSHR	Melanoma	factor(sample_all$sex)Male	0.795454	0.319333	2.49099	0.0127389	0.397256
PAK7	Colorectal Cancer	relevel(factor(race), ref = "Stage IV")Stage I	1.02627	0.412176	2.48988	0.0127788	0.398107
ATRX	Colorectal Cancer	factor(sample_subtypes)Rectal Adenocarcinoma	-0.598442	0.240394	-2.48942	0.0127953	0.398228
PDGFRA	Hepatobiliary Cancer	relevel(factor(race), ref = "Stage IV")Stage II/III	3.09719	1.24505	2.4876	0.0128609	0.399876
XRCC2	Colorectal Cancer	factor(sample_subtypes)Rectal Adenocarcinoma	-1.88269	0.757579	-2.48514	0.0129499	0.402248
CTNNB1	Non-Small Cell Lung Cancer	relevel(factor(race), ref = "Stage IV")Stage I	-0.816131	0.328594	-2.48371	0.0130023	0.40348
NOTCH4	Colorectal Cancer	relevel(factor(race), ref = "Stage IV")Stage I	0.72679	0.292756	2.48258	0.0130434	0.404359
SDHA	Melanoma	factor(sample_all$sex)Male	2.55826	1.03074	2.48196	0.0130662	0.404668
TGFBR2	Endometrial Cancer	factor(sample_subtypes)Uterine Endometrioid Carcinoma	-2.04747	0.825175	-2.48126	0.013092	0.40507
SOX9	Colorectal Cancer	relevel(factor(race), ref = "Stage IV")Stage I	0.532564	0.214723	2.48024	0.0131295	0.40567
DAXX	Colorectal Cancer	relevel(factor(race), ref = "Stage IV")Stage I	1.10392	0.445125	2.48003	0.013137	0.40567
FBXW7	Endometrial Cancer	relevel(factor(race), ref = "Stage IV")others	0.583315	0.235298	2.47905	0.0131734	0.406395
CDH1	Breast Cancer	factor(aya_status)1	-1.24127	0.501101	-2.47708	0.0132464	0.40825
TP53	Melanoma	factor(sample_subtypes)Mucosal Melanoma of the Vulva/Vagina	1.17317	0.473939	2.47535	0.0133105	0.40908
TP53	Esophagogastric Cancer	factor(sample_subtypes)Stomach Adenocarcinoma	-0.505617	0.204329	-2.47452	0.0133416	0.40908
FLT1	Melanoma	factor(aya_status)1	-1.48023	0.598214	-2.47441	0.0133457	0.40908
IKZF1	Melanoma	factor(sample_subtypes)Cutaneous Melanoma	2.50924	1.01393	2.47478	0.0133318	0.40908
PDGFRB	Colorectal Cancer	relevel(factor(race), ref = "Stage IV")Stage II/III	1.53378	0.619574	2.47555	0.0133033	0.40908
RHOA	Esophagogastric Cancer	relevel(factor(race), ref = "Stage IV")Stage I	1.52964	0.61825	2.47414	0.0133558	0.40908
STK19	Melanoma	relevel(factor(race), ref = "Stage IV")Stage I	1.35948	0.549522	2.47392	0.0133639	0.40908
IL10	Bladder Cancer	relevel(factor(race), ref = "Stage IV")Stage II/III	2.9505	1.19329	2.47258	0.013414	0.410218
ERBB4	Esophagogastric Cancer	factor(sample_all$sex)Male	0.986664	0.399275	2.47114	0.0134684	0.411482
KDM6A	Bladder Cancer	factor(sample_all$sex)Male	-0.336569	0.136285	-2.4696	0.0135263	0.412579
HOXB13	Non-Small Cell Lung Cancer	factor(sample_subtypes)Lung Adenocarcinoma	-1.53167	0.620236	-2.46949	0.0135304	0.412579
APC	Melanoma	factor(sample_all$sex)Male	0.530663	0.21492	2.46911	0.0135448	0.412622
JAK2	Head and Neck Cancer	relevel(factor(race), ref = "Stage IV")Stage I	2.44665	0.991381	2.46793	0.0135899	0.413371
PPARG	Non-Small Cell Lung Cancer	factor(aya_status)1	1.88112	0.762272	2.46778	0.0135956	0.413371
RNF43	Endometrial Cancer	factor(sample_subtypes)Uterine Carcinosarcoma/Uterine Malignant Mixed Mullerian Tumor	-2.28205	0.925015	-2.46704	0.0136236	0.41352
INPP4A	Colorectal Cancer	relevel(factor(race), ref = "Stage IV")Stage II/III	1.53044	0.620374	2.46696	0.0136266	0.41352
NRAS	Bladder Cancer	relevel(factor(race), ref = "Stage IV")Stage I	1.23418	0.500989	2.46349	0.013759	0.416868
AMER1	Esophagogastric Cancer	relevel(factor(race), ref = "Stage IV")Stage I	1.66064	0.67413	2.46338	0.0137633	0.416868
HNF1A	Colorectal Cancer	factor(sample_subtypes)others	1.9762	0.802951	2.46117	0.0138485	0.419047
FLT3	Melanoma	factor(sample_subtypes)Cutaneous Melanoma	2.492	1.01322	2.45947	0.0139141	0.420629
ERBB4	Non-Small Cell Lung Cancer	relevel(factor(race), ref = "Stage IV")Stage I	-0.711837	0.289544	-2.45847	0.013953	0.421343
MCL1	Bladder Cancer	relevel(factor(race), ref = "Stage IV")Stage I	1.23075	0.500745	2.45784	0.0139777	0.421343
PLCG2	Colorectal Cancer	relevel(factor(race), ref = "Stage IV")Stage I	0.77794	0.316496	2.45798	0.0139721	0.421343
DNMT3A	Hepatobiliary Cancer	factor(sample_subtypes)Intrahepatic Cholangiocarcinoma	-1.83912	0.748536	-2.45696	0.0140119	0.421971
APC	Endometrial Cancer	factor(sample_subtypes)Uterine Carcinosarcoma/Uterine Malignant Mixed Mullerian Tumor	-2.27122	0.924952	-2.4555	0.0140688	0.423284
STAG2	Endometrial Cancer	factor(sample_subtypes)Uterine Carcinosarcoma/Uterine Malignant Mixed Mullerian Tumor	-2.27073	0.925023	-2.45479	0.0140968	0.423721
PTPN11	Colorectal Cancer	factor(sample_all$sex)Male	0.837995	0.341711	2.45235	0.0141928	0.424367
SMAD4	Bladder Cancer	relevel(factor(race), ref = "Stage IV")Stage I	1.07611	0.438742	2.45272	0.014178	0.424367
SOCS1	Bladder Cancer	relevel(factor(race), ref = "Stage IV")Stage II/III	2.92836	1.1941	2.45237	0.0141919	0.424367
MAP2K2	Colorectal Cancer	factor(sample_subtypes)others	2.66731	1.08758	2.45251	0.0141863	0.424367
MAX	Colorectal Cancer	factor(sample_all$sex)Male	-1.39869	0.570154	-2.45317	0.0141602	0.424367
ICOSLG	Melanoma	factor(sample_all$sex)Male	2.50995	1.02355	2.45219	0.0141988	0.424367
BCL2	Colorectal Cancer	relevel(factor(race), ref = "Stage IV")Stage I	1.60226	0.653542	2.45166	0.0142201	0.424601
HRAS	Bladder Cancer	factor(sample_all$sex)Male	0.891212	0.363769	2.44994	0.0142881	0.425482
GATA3	Head and Neck Cancer	relevel(factor(race), ref = "Stage IV")Stage I	3.21089	1.31091	2.44936	0.0143109	0.425482
ATR	Endometrial Cancer	factor(sample_subtypes)Uterine Carcinosarcoma/Uterine Malignant Mixed Mullerian Tumor	-2.26499	0.924944	-2.44879	0.0143339	0.425482
NOTCH3	Colorectal Cancer	relevel(factor(race), ref = "Stage IV")Stage I	0.638217	0.260653	2.44854	0.0143438	0.425482
POLD1	Esophagogastric Cancer	relevel(factor(race), ref = "Stage IV")others	1.71089	0.69874	2.44854	0.0143436	0.425482
MGA	Bladder Cancer	relevel(factor(race), ref = "Stage IV")Stage I	0.627369	0.256164	2.44909	0.0143217	0.425482
SOS1	Colorectal Cancer	relevel(factor(race), ref = "Stage IV")Stage I	1.02134	0.417061	2.44889	0.0143296	0.425482
IKBKE	Melanoma	relevel(factor(race), ref = "Stage IV")Stage I	1.62886	0.665539	2.44744	0.0143876	0.426384
MTOR	Colorectal Cancer	factor(sample_subtypes)Colorectal Adenocarcinoma	-0.699123	0.285763	-2.44651	0.0144246	0.427078
ATRX	Soft Tissue Sarcoma	factor(sample_subtypes)Leiomyosarcoma	1.31719	0.538795	2.44469	0.0144978	0.427383
RNF43	Non-Small Cell Lung Cancer	factor(sample_all$sex)Male	0.648601	0.265323	2.44457	0.0145025	0.427383
TGFBR2	Hepatobiliary Cancer	factor(sample_subtypes)Intrahepatic Cholangiocarcinoma	-1.3107	0.536155	-2.44464	0.0144998	0.427383
BMPR1A	Non-Small Cell Lung Cancer	factor(sample_all$sex)Male	1.02756	0.420253	2.4451	0.0144812	0.427383
HIST1H3D	Bladder Cancer	relevel(factor(race), ref = "Stage IV")others	1.7001	0.695361	2.44491	0.0144887	0.427383
MET	Esophagogastric Cancer	factor(aya_status)1	1.71763	0.703239	2.44246	0.0145875	0.428064
FLT3	Melanoma	factor(sample_subtypes)Melanoma of Unknown Primary	2.52049	1.03271	2.44064	0.0146612	0.428064
ROS1	Breast Cancer	factor(sample_subtypes)Breast Invasive Ductal Carcinoma	-1.97311	0.807713	-2.44284	0.0145721	0.428064
ARID1A	Melanoma	relevel(factor(race), ref = "Stage IV")Stage I	1.01741	0.416401	2.44335	0.0145516	0.428064
FLT1	Esophagogastric Cancer	factor(sample_subtypes)Esophagogastric Adenocarcinoma	1.83892	0.753305	2.44113	0.0146414	0.428064
GATA3	Head and Neck Cancer	relevel(factor(race), ref = "Stage IV")others	3.81162	1.56041	2.4427	0.0145777	0.428064
MSH2	Colorectal Cancer	relevel(factor(race), ref = "Stage IV")Stage I	0.886522	0.363194	2.4409	0.0146506	0.428064
SMARCA4	Bladder Cancer	factor(sample_subtypes)Upper Tract Urothelial Carcinoma	0.548709	0.224821	2.44065	0.0146609	0.428064
ERCC3	Breast Cancer	factor(sample_subtypes)Breast Invasive Ductal Carcinoma	-2.97275	1.21779	-2.4411	0.0146428	0.428064
ZFHX3	Head and Neck Cancer	relevel(factor(race), ref = "Stage IV")Stage I	1.9445	0.796824	2.44031	0.0146745	0.428064
INPPL1	Non-Small Cell Lung Cancer	factor(sample_all$sex)Male	0.601394	0.246393	2.44079	0.014655	0.428064
KMT2A	Colorectal Cancer	factor(aya_status)1	0.509486	0.208835	2.43966	0.0147012	0.428449
PTPRD	Non-Small Cell Lung Cancer	relevel(factor(race), ref = "Stage IV")Stage I	-0.455882	0.186903	-2.43913	0.0147226	0.428677
PAK1	Bladder Cancer	factor(sample_subtypes)Upper Tract Urothelial Carcinoma	1.59227	0.653093	2.43804	0.014767	0.428877
STAT5A	Non-Small Cell Lung Cancer	factor(sample_all$sex)Male	1.0702	0.438974	2.43797	0.0147702	0.428877
HIST1H3J	Colorectal Cancer	factor(sample_all$sex)Male	-1.38998	0.570118	-2.43805	0.0147667	0.428877
RUNX1	Breast Cancer	factor(aya_status)1	-1.74865	0.717659	-2.43661	0.0148258	0.429311
EPHA3	Breast Cancer	factor(sample_all$sex)Male	1.93702	0.794881	2.43687	0.014815	0.429311
IRS1	Colorectal Cancer	factor(aya_status)1	0.566949	0.232636	2.43707	0.014807	0.429311
ARAF	Colorectal Cancer	factor(sample_subtypes)Rectal Adenocarcinoma	-0.954361	0.391945	-2.43494	0.0148944	0.430143
NBN	Breast Cancer	factor(sample_subtypes)Breast Invasive Ductal Carcinoma	-2.6489	1.08803	-2.43458	0.014909	0.430143
INPP4B	Colorectal Cancer	relevel(factor(race), ref = "Stage IV")Stage I	1.00509	0.412713	2.43533	0.0148782	0.430143
ANKRD11	Esophagogastric Cancer	factor(sample_all$sex)Male	-1.25112	0.51386	-2.43475	0.0149023	0.430143
FGFR4	Colorectal Cancer	relevel(factor(race), ref = "Stage IV")others	1.33305	0.547634	2.43419	0.0149251	0.430216
GRIN2A	Ovarian Cancer	factor(sample_subtypes)High-Grade Serous Ovarian Cancer	-1.60745	0.660463	-2.43382	0.0149404	0.430263
ERBB2	Esophagogastric Cancer	factor(sample_subtypes)Esophageal Adenocarcinoma	-1.35734	0.557839	-2.43321	0.0149657	0.430359
MGA	Breast Cancer	factor(sample_subtypes)Breast Invasive Lobular Carcinoma	-2.15506	0.885733	-2.43308	0.0149709	0.430359
CHEK2	Colorectal Cancer	factor(sample_subtypes)Colorectal Adenocarcinoma	0.826313	0.339785	2.43187	0.0150209	0.431405
STK11	Non-Small Cell Lung Cancer	factor(sample_subtypes)others	-1.86328	0.766381	-2.43128	0.0150457	0.431724
BCOR	Colorectal Cancer	relevel(factor(race), ref = "Stage IV")others	1.01113	0.416189	2.4295	0.0151198	0.433456
DNMT3A	Ovarian Cancer	factor(sample_subtypes)High-Grade Serous Ovarian Cancer	-1.518	0.624914	-2.42914	0.0151348	0.433494
TSC2	Colorectal Cancer	factor(sample_subtypes)Rectal Adenocarcinoma	-0.61387	0.252746	-2.4288	0.0151489	0.433506
INHBA	Melanoma	relevel(factor(race), ref = "Stage IV")Stage I	1.19693	0.492958	2.42805	0.0151801	0.434005
BAP1	Renal Cell Carcinoma	relevel(factor(race), ref = "Stage IV")Stage I	-1.3111	0.540213	-2.42701	0.0152239	0.434264
FLT1	Colorectal Cancer	factor(sample_subtypes)Rectal Adenocarcinoma	-0.719834	0.296652	-2.42653	0.0152441	0.434264
HOXB13	Non-Small Cell Lung Cancer	factor(sample_subtypes)Lung Squamous Cell Carcinoma	-2.23661	0.921602	-2.42687	0.0152298	0.434264
KNSTRN	Melanoma	factor(sample_all$sex)Male	0.92122	0.379606	2.42678	0.0152335	0.434264
CHEK2	Breast Cancer	factor(sample_subtypes)Breast Invasive Lobular Carcinoma	-3.51622	1.44957	-2.4257	0.0152787	0.434859
CDKN2C	Non-Small Cell Lung Cancer	factor(sample_subtypes)Lung Squamous Cell Carcinoma	-2.23332	0.920964	-2.42498	0.0153091	0.434941
WHSC1L1	Breast Cancer	factor(sample_subtypes)Breast Invasive Ductal Carcinoma	-2.73252	1.12669	-2.42526	0.0152972	0.434941
PLK2	Breast Cancer	factor(sample_subtypes)Breast Invasive Lobular Carcinoma	-2.18699	0.901993	-2.42462	0.0153243	0.434981
KDM6A	Bladder Cancer	factor(sample_subtypes)Upper Tract Urothelial Carcinoma	-0.408213	0.168447	-2.4234	0.015376	0.43533
ROS1	Melanoma	factor(sample_subtypes)Head and Neck Mucosal Melanoma	2.61918	1.08078	2.42341	0.0153754	0.43533
IKBKE	Colorectal Cancer	relevel(factor(race), ref = "Stage IV")Stage II/III	1.8325	0.756181	2.42336	0.0153779	0.43533
ATM	Ovarian Cancer	relevel(factor(race), ref = "Stage IV")Stage II/III	2.85278	1.17743	2.42289	0.0153975	0.435496
RNF43	Melanoma	factor(sample_all$sex)Male	0.962597	0.39743	2.42205	0.0154331	0.436114
KRAS	Colorectal Cancer	relevel(factor(race), ref = "Stage IV")others	-0.531621	0.219651	-2.42031	0.0155075	0.436199
NF1	Non-Small Cell Lung Cancer	factor(sample_subtypes)Lung Adenocarcinoma	-0.740313	0.305811	-2.42082	0.0154856	0.436199
FAM46C	Colorectal Cancer	relevel(factor(race), ref = "Stage IV")others	1.88806	0.779965	2.4207	0.0154906	0.436199
EPHA3	Melanoma	factor(sample_subtypes)Cutaneous Melanoma	2.45956	1.01582	2.42126	0.0154668	0.436199
IRS1	Colorectal Cancer	factor(sample_subtypes)Rectal Adenocarcinoma	-0.613917	0.253681	-2.42004	0.0155189	0.436199
PTPRS	Renal Cell Carcinoma	factor(sample_subtypes)Renal Clear Cell Carcinoma	-2.93483	1.21269	-2.4201	0.0155162	0.436199
CASP8	Colorectal Cancer	relevel(factor(race), ref = "Stage IV")Stage II/III	1.31165	0.542147	2.41937	0.0155473	0.436536
ZFHX3	Bladder Cancer	factor(sample_subtypes)Upper Tract Urothelial Carcinoma	0.594002	0.245546	2.41911	0.0155585	0.436536
CDH1	Endometrial Cancer	factor(aya_status)1	1.38015	0.570615	2.4187	0.015576	0.43664
KMT2C	Melanoma	factor(aya_status)1	-1.14191	0.472191	-2.41831	0.0155927	0.436721
TP53	Thyroid Cancer	factor(sample_subtypes)Papillary Thyroid Cancer	-2.18355	0.903231	-2.41749	0.015628	0.437032
STK40	Non-Small Cell Lung Cancer	factor(sample_subtypes)Lung Squamous Cell Carcinoma	-2.22564	0.920793	-2.41709	0.0156453	0.437032
ERF	Non-Small Cell Lung Cancer	factor(sample_subtypes)Lung Adenocarcinoma	-1.84558	0.763458	-2.4174	0.0156319	0.437032
RAF1	Colorectal Cancer	relevel(factor(race), ref = "Stage IV")Stage I	0.998767	0.413399	2.41599	0.0156927	0.437968
NFE2L2	Endometrial Cancer	relevel(factor(race), ref = "Stage IV")Stage I	0.647591	0.268155	2.41499	0.0157357	0.438782
NF1	Gastrointestinal Stromal Tumor	factor(aya_status)1	1.35453	0.561733	2.41134	0.015894	0.439934
RUNX1	Breast Cancer	relevel(factor(race), ref = "Stage IV")Stage I	0.515968	0.213934	2.41181	0.0158737	0.439934
FLT4	Colorectal Cancer	factor(sample_subtypes)Rectal Adenocarcinoma	-0.520004	0.215477	-2.41327	0.0158103	0.439934
HNF1A	Colorectal Cancer	relevel(factor(race), ref = "Stage IV")Stage I	0.828963	0.343761	2.41146	0.015889	0.439934
PMS2	Breast Cancer	factor(sample_subtypes)Breast Invasive Ductal Carcinoma	-2.62278	1.08665	-2.41365	0.0157937	0.439934
BRD4	Head and Neck Cancer	relevel(factor(race), ref = "Stage IV")others	3.85403	1.59842	2.41115	0.0159023	0.439934
PIK3C3	Colorectal Cancer	relevel(factor(race), ref = "Stage IV")others	1.33261	0.552641	2.41134	0.015894	0.439934
ZFHX3	Endometrial Cancer	factor(sample_subtypes)Uterine Carcinosarcoma/Uterine Malignant Mixed Mullerian Tumor	-2.2313	0.924975	-2.41228	0.0158532	0.439934
DNMT1	Colorectal Cancer	relevel(factor(race), ref = "Stage IV")Stage II/III	1.30858	0.542363	2.41274	0.0158332	0.439934
TP53	Soft Tissue Sarcoma	factor(sample_subtypes)others	1.83473	0.761519	2.4093	0.0159833	0.440633
CDKN2B	Endometrial Cancer	relevel(factor(race), ref = "Stage IV")Stage II/III	3.46574	1.43831	2.40958	0.0159709	0.440633
CBFB	Breast Cancer	factor(sample_subtypes)Breast Invasive Ductal Carcinoma	-1.56853	0.650945	-2.40962	0.0159692	0.440633
RNF43	Head and Neck Cancer	relevel(factor(race), ref = "Stage IV")others	3.21823	1.33566	2.40947	0.0159758	0.440633
PIK3CA	Ovarian Cancer	relevel(factor(race), ref = "Stage IV")others	1.16833	0.485069	2.40859	0.0160142	0.441101
PRKAR1A	Endometrial Cancer	relevel(factor(race), ref = "Stage IV")Stage II/III	1.96534	0.816341	2.4075	0.0160622	0.441333
NOTCH3	Melanoma	factor(aya_status)1	-1.26125	0.523895	-2.40745	0.0160645	0.441333
LATS1	Melanoma	factor(sample_all$sex)Male	1.18289	0.491256	2.40788	0.0160452	0.441333
MST1R	Colorectal Cancer	relevel(factor(race), ref = "Stage IV")Stage II/III	1.50062	0.623626	2.40629	0.0161155	0.442352
RUNX1	Esophagogastric Cancer	relevel(factor(race), ref = "Stage IV")others	2.12762	0.884748	2.40478	0.0161823	0.443798
SMARCB1	Colorectal Cancer	factor(sample_subtypes)Rectal Adenocarcinoma	-1.1544	0.480151	-2.40425	0.0162056	0.443864
ARAF	Bladder Cancer	factor(sample_subtypes)Upper Tract Urothelial Carcinoma	1.37159	0.57057	2.40389	0.0162218	0.443864
CARD11	Melanoma	factor(aya_status)1	-1.43871	0.598519	-2.40377	0.0162268	0.443864
ASXL2	Colorectal Cancer	relevel(factor(race), ref = "Stage IV")Stage I	0.869995	0.362227	2.4018	0.0163148	0.445886
TET1	Colorectal Cancer	factor(sample_subtypes)Rectal Adenocarcinoma	-0.624707	0.260138	-2.40145	0.0163303	0.445925
SETD2	Ovarian Cancer	relevel(factor(race), ref = "Stage IV")Stage I	1.92289	0.800946	2.40077	0.0163606	0.446365
BRAF	Melanoma	factor(sample_subtypes)Head and Neck Mucosal Melanoma	1.6719	0.696875	2.39914	0.0164338	0.447976
PTPRT	Ovarian Cancer	relevel(factor(race), ref = "Stage IV")Stage II/III	2.82319	1.17737	2.39787	0.0164907	0.44914
EIF1AX	Colorectal Cancer	factor(sample_all$sex)Male	-1.84809	0.771269	-2.39617	0.0165674	0.45084
MAP2K1	Colorectal Cancer	factor(aya_status)1	0.797137	0.332824	2.39507	0.0166171	0.451806
ATRX	Head and Neck Cancer	factor(sample_all$sex)Male	-1.25222	0.522997	-2.39431	0.0166516	0.452352
AURKA	Colorectal Cancer	relevel(factor(race), ref = "Stage IV")Stage II/III	1.82046	0.760525	2.39368	0.0166801	0.452352
PDCD1	Colorectal Cancer	factor(sample_subtypes)Rectal Adenocarcinoma	-0.991268	0.414078	-2.39391	0.0166697	0.452352
IRS2	Colorectal Cancer	factor(sample_subtypes)Rectal Adenocarcinoma	-0.645091	0.269535	-2.39335	0.0166952	0.452372
TOP1	Non-Small Cell Lung Cancer	factor(sample_subtypes)Lung Squamous Cell Carcinoma	-1.63741	0.684304	-2.39281	0.0167198	0.452651
SMAD2	Non-Small Cell Lung Cancer	relevel(factor(race), ref = "Stage IV")Stage II/III	1.48022	0.618698	2.39248	0.0167348	0.452669
MSH6	Colorectal Cancer	factor(aya_status)1	0.556225	0.232529	2.39207	0.0167537	0.452793
HIST3H3	Melanoma	relevel(factor(race), ref = "Stage IV")others	1.94679	0.814178	2.39112	0.0167972	0.453582
CDKN2B	Endometrial Cancer	relevel(factor(race), ref = "Stage IV")others	2.77259	1.1604	2.38934	0.0168787	0.455394
CDKN2B	Colorectal Cancer	relevel(factor(race), ref = "Stage IV")Stage I	1.31841	0.552004	2.38841	0.0169216	0.456161
EGFL7	Colorectal Cancer	relevel(factor(race), ref = "Stage IV")Stage I	1.55019	0.649491	2.38678	0.0169968	0.457799
SYK	Bladder Cancer	relevel(factor(race), ref = "Stage IV")Stage I	1.30742	0.548286	2.38457	0.0170993	0.460166
MAP3K1	Pancreatic Cancer	relevel(factor(race), ref = "Stage IV")others	1.87788	0.787957	2.38322	0.0171618	0.460716
LMO1	Colorectal Cancer	factor(sample_all$sex)Male	1.80588	0.757602	2.38368	0.0171403	0.460716
TCF3	Breast Cancer	factor(sample_all$sex)Male	2.08422	0.874552	2.38319	0.0171634	0.460716
BRAF	Non-Small Cell Lung Cancer	factor(sample_subtypes)Lung Squamous Cell Carcinoma	-1.12723	0.473199	-2.38214	0.0172122	0.461636
EGFR	Colorectal Cancer	relevel(factor(race), ref = "Stage IV")Stage II/III	1.46969	0.617463	2.3802	0.0173031	0.462302
ASXL1	Thyroid Cancer	factor(sample_subtypes)Papillary Thyroid Cancer	-3.19672	1.34374	-2.37898	0.0173607	0.462302
CCNE1	Colorectal Cancer	relevel(factor(race), ref = "Stage IV")Stage I	1.53344	0.644297	2.38002	0.0173117	0.462302
PIK3R1	Colorectal Cancer	factor(sample_subtypes)Rectal Adenocarcinoma	-0.529364	0.22248	-2.37938	0.0173417	0.462302
BRD4	Head and Neck Cancer	factor(sample_subtypes)Oral Cavity Squamous Cell Carcinoma	2.98488	1.25381	2.38065	0.0172822	0.462302
KDM5A	Ovarian Cancer	relevel(factor(race), ref = "Stage IV")Stage I	1.90509	0.800667	2.37938	0.0173419	0.462302
SYK	Non-Small Cell Lung Cancer	factor(sample_subtypes)Lung Squamous Cell Carcinoma	-1.98929	0.836255	-2.37881	0.0173687	0.462302
MAPK1	Bladder Cancer	relevel(factor(race), ref = "Stage IV")Stage I	1.11197	0.467066	2.38076	0.0172769	0.462302
RECQL4	Esophagogastric Cancer	factor(aya_status)1	1.79295	0.753068	2.38086	0.0172722	0.462302
ERCC4	Colorectal Cancer	factor(sample_all$sex)Male	0.762459	0.32065	2.37785	0.0174139	0.463116
EPHA3	Colorectal Cancer	relevel(factor(race), ref = "Stage IV")Stage I	0.694985	0.29235	2.37723	0.017443	0.4635
GSK3B	Non-Small Cell Lung Cancer	factor(sample_all$sex)Male	-1.05001	0.442054	-2.3753	0.0175346	0.465543
BRAF	Head and Neck Cancer	relevel(factor(race), ref = "Stage IV")others	3.24568	1.36714	2.37407	0.0175931	0.466427
MST1R	Ovarian Cancer	factor(sample_subtypes)High-Grade Serous Ovarian Cancer	-1.56441	0.659066	-2.37367	0.0176121	0.466427
TET1	Non-Small Cell Lung Cancer	factor(sample_subtypes)Lung Adenocarcinoma	-0.961251	0.404959	-2.3737	0.0176109	0.466427
TET2	Colorectal Cancer	relevel(factor(race), ref = "Stage IV")Stage II/III	1.28736	0.542651	2.37235	0.0176756	0.467323
IKBKE	Colorectal Cancer	relevel(factor(race), ref = "Stage IV")Stage I	1.16073	0.489235	2.37253	0.0176667	0.467323
KMT2D	Soft Tissue Sarcoma	factor(sample_subtypes)Undifferentiated Pleomorphic Sarcoma/Malignant Fibrous Histiocytoma/High-Grade Spindle Cell Sarcoma	1.56562	0.660064	2.37192	0.0176957	0.467466
ERCC2	Melanoma	relevel(factor(race), ref = "Stage IV")Stage I	1.28751	0.543096	2.37068	0.0177553	0.468649
CREBBP	Esophagogastric Cancer	relevel(factor(race), ref = "Stage IV")others	1.57678	0.665215	2.37034	0.0177719	0.468694
FBXW7	Breast Cancer	factor(aya_status)1	1.27058	0.536383	2.3688	0.017846	0.469866
MTOR	Endometrial Cancer	relevel(factor(race), ref = "Stage IV")Stage II/III	1.23057	0.519436	2.36904	0.0178342	0.469866
INSR	Colorectal Cancer	relevel(factor(race), ref = "Stage IV")Stage II/III	1.47366	0.622441	2.36755	0.0179063	0.47106
TET2	Colorectal Cancer	factor(aya_status)1	0.588639	0.248672	2.36713	0.0179266	0.471204
STAG2	Thyroid Cancer	relevel(factor(race), ref = "Stage IV")Stage I	2.09212	0.884321	2.3658	0.0179913	0.471342
TNFAIP3	Colorectal Cancer	factor(sample_subtypes)Rectal Adenocarcinoma	-0.980905	0.414727	-2.36518	0.0180213	0.471342
AMER1	Colorectal Cancer	relevel(factor(race), ref = "Stage IV")Stage I	0.586806	0.248082	2.36537	0.0180121	0.471342
GREM1	Colorectal Cancer	relevel(factor(race), ref = "Stage IV")Stage II/III	2.63041	1.11165	2.36622	0.0179706	0.471342
TP53BP1	Thyroid Cancer	relevel(factor(race), ref = "Stage IV")Stage II/III	3.5669	1.50799	2.36534	0.0180134	0.471342
STK19	Non-Small Cell Lung Cancer	relevel(factor(race), ref = "Stage IV")Stage II/III	1.87194	0.791285	2.3657	0.0179962	0.471342
TP53BP1	Breast Cancer	factor(sample_all$sex)Male	1.96016	0.828871	2.36486	0.0180369	0.47136
TSC2	Esophagogastric Cancer	factor(sample_subtypes)Stomach Adenocarcinoma	-2.67824	1.13278	-2.36431	0.0180635	0.471666
CBL	Colorectal Cancer	factor(aya_status)1	0.85585	0.36213	2.36338	0.0181092	0.472199
B2M	Colorectal Cancer	factor(sample_subtypes)Rectal Adenocarcinoma	-0.563831	0.23858	-2.36328	0.0181138	0.472199
ASXL1	Hepatobiliary Cancer	factor(aya_status)1	1.49777	0.634045	2.36224	0.0181648	0.47281
YES1	Endometrial Cancer	factor(sample_subtypes)Uterine Endometrioid Carcinoma	-1.93669	0.819869	-2.36219	0.0181672	0.47281
PIK3R3	Bladder Cancer	relevel(factor(race), ref = "Stage IV")others	1.65803	0.702124	2.36145	0.0182037	0.47337
NF1	Hepatobiliary Cancer	factor(sample_subtypes)Intrahepatic Cholangiocarcinoma	-1.15298	0.488778	-2.3589	0.0183291	0.473899
ARID1A	Colorectal Cancer	relevel(factor(race), ref = "Stage IV")others	0.674429	0.286091	2.35739	0.0184039	0.473899
ARID1A	Head and Neck Cancer	factor(sample_subtypes)Oral Cavity Squamous Cell Carcinoma	-1.64755	0.698803	-2.35767	0.0183901	0.473899
ARID2	Non-Small Cell Lung Cancer	factor(sample_all$sex)Male	0.326175	0.138348	2.35764	0.0183918	0.473899
CRLF2	Colorectal Cancer	relevel(factor(race), ref = "Stage IV")Stage I	1.53259	0.650049	2.35765	0.0183909	0.473899
CSF3R	Breast Cancer	factor(sample_subtypes)Breast Invasive Ductal Carcinoma	-2.56769	1.08804	-2.35992	0.018279	0.473899
DAXX	Pancreatic Cancer	factor(aya_status)1	-1.77485	0.752112	-2.35982	0.0182837	0.473899
GLI1	Bladder Cancer	relevel(factor(race), ref = "Stage IV")others	1.14438	0.485089	2.35911	0.0183188	0.473899
HIST1H3B	Non-Small Cell Lung Cancer	factor(aya_status)1	1.4578	0.617791	2.3597	0.0182898	0.473899
CUL3	Bladder Cancer	relevel(factor(race), ref = "Stage IV")Stage I	0.736741	0.312113	2.3605	0.0182504	0.473899
TRAF7	Pancreatic Cancer	factor(sample_subtypes)Pancreatic Neuroendocrine Tumor	-3.06874	1.30136	-2.3581	0.0183686	0.473899
BIRC3	Non-Small Cell Lung Cancer	factor(sample_all$sex)Male	0.837286	0.355157	2.35751	0.0183979	0.473899
SF3B1	Esophagogastric Cancer	factor(sample_all$sex)Male	-1.33158	0.565397	-2.35513	0.0185165	0.47636
MYOD1	Colorectal Cancer	relevel(factor(race), ref = "Stage IV")Stage I	0.966468	0.410414	2.35486	0.0185295	0.47636
ABL1	Non-Small Cell Lung Cancer	factor(sample_all$sex)Male	0.593813	0.252197	2.35456	0.0185447	0.476363
NTRK3	Hepatobiliary Cancer	relevel(factor(race), ref = "Stage IV")others	1.91875	0.815035	2.3542	0.0185627	0.476437
TET1	Melanoma	factor(sample_all$sex)Male	0.707761	0.300771	2.35316	0.0186147	0.477385
SUZ12	Bladder Cancer	relevel(factor(race), ref = "Stage IV")Stage I	1.28798	0.547644	2.35186	0.0186797	0.478663
NRAS	Melanoma	factor(sample_subtypes)Melanoma of Unknown Primary	0.873504	0.371593	2.3507	0.0187381	0.479772
INPPL1	Colorectal Cancer	factor(sample_subtypes)Colorectal Adenocarcinoma	-0.74004	0.315019	-2.34919	0.0188142	0.481329
CTNNB1	Endometrial Cancer	relevel(factor(race), ref = "Stage IV")Stage I	-0.42464	0.180974	-2.34641	0.0189554	0.482625
RET	Colorectal Cancer	factor(sample_subtypes)Rectal Adenocarcinoma	-0.81119	0.345514	-2.34778	0.0188859	0.482625
BLM	Head and Neck Cancer	relevel(factor(race), ref = "Stage IV")others	3.18878	1.35833	2.34758	0.018896	0.482625
SPOP	Colorectal Cancer	factor(aya_status)1	1.12722	0.48027	2.34705	0.0189227	0.482625
BMPR1A	Non-Small Cell Lung Cancer	relevel(factor(race), ref = "Stage IV")others	1.77897	0.758172	2.34639	0.0189564	0.482625
WHSC1	Colorectal Cancer	factor(aya_status)1	0.753463	0.32104	2.34694	0.0189282	0.482625
MYCN	Colorectal Cancer	relevel(factor(race), ref = "Stage IV")Stage I	1.04143	0.443997	2.34558	0.0189973	0.48323
MAP3K1	Colorectal Cancer	factor(sample_subtypes)Rectal Adenocarcinoma	-0.636333	0.27132	-2.34532	0.0190107	0.48323
ERG	Melanoma	factor(sample_all$sex)Male	0.731612	0.312042	2.3446	0.0190477	0.48358
NOTCH4	Melanoma	factor(sample_all$sex)Male	0.463685	0.19778	2.34445	0.0190551	0.48358
SMO	Colorectal Cancer	relevel(factor(race), ref = "Stage IV")Stage I	0.847724	0.36197	2.34197	0.019182	0.484984
DNMT3A	Melanoma	relevel(factor(race), ref = "Stage IV")Stage I	1.37638	0.587743	2.34181	0.0191902	0.484984
KMT2A	Hepatobiliary Cancer	relevel(factor(race), ref = "Stage IV")Stage II/III	1.96755	0.839776	2.34294	0.0191323	0.484984
HGF	Non-Small Cell Lung Cancer	relevel(factor(race), ref = "Stage IV")Stage I	-0.655274	0.279752	-2.34234	0.0191634	0.484984
EED	Colorectal Cancer	relevel(factor(race), ref = "Stage IV")Stage I	1.51802	0.64829	2.34158	0.0192024	0.484984
EIF4A2	Endometrial Cancer	relevel(factor(race), ref = "Stage IV")Stage II/III	1.90389	0.812803	2.34238	0.0191612	0.484984
MDM4	Breast Cancer	factor(sample_all$sex)Male	2.60771	1.11382	2.34124	0.0192198	0.485036
RPTOR	Colorectal Cancer	factor(sample_subtypes)Rectal Adenocarcinoma	-0.781438	0.3339	-2.34033	0.0192665	0.48565
AXIN1	Hepatobiliary Cancer	factor(sample_subtypes)Hepatocellular Carcinoma	2.4399	1.04262	2.34017	0.0192749	0.48565
KDM5A	Colorectal Cancer	factor(sample_subtypes)Rectal Adenocarcinoma	-0.649276	0.277502	-2.33972	0.0192982	0.48585
ZFHX3	Melanoma	factor(sample_subtypes)Cutaneous Melanoma	2.37174	1.01423	2.33846	0.0193633	0.487102
RXRA	Colorectal Cancer	relevel(factor(race), ref = "Stage IV")Stage I	1.15778	0.495182	2.3381	0.0193821	0.487188
INSR	Breast Cancer	factor(sample_subtypes)Breast Invasive Ductal Carcinoma	-2.5207	1.07833	-2.33761	0.0194077	0.487443
FH	Endometrial Cancer	factor(sample_subtypes)Uterine Serous Carcinoma/Uterine Papillary Serous Carcinoma	-3.39182	1.45124	-2.33718	0.0194296	0.487506
RAC1	Head and Neck Cancer	relevel(factor(race), ref = "Stage IV")others	3.19847	1.36864	2.33696	0.019441	0.487506
RB1	Bladder Cancer	factor(sample_all$sex)Male	0.476273	0.203856	2.33632	0.0194744	0.487701
PRKD1	Non-Small Cell Lung Cancer	relevel(factor(race), ref = "Stage IV")Stage II/III	1.04719	0.448241	2.33622	0.0194797	0.487701
RAC1	Germ Cell Tumor	factor(aya_status)1	-1.34065	0.574005	-2.33562	0.0195112	0.488105
PRKD1	Non-Small Cell Lung Cancer	relevel(factor(race), ref = "Stage IV")Stage I	-2.35364	1.00844	-2.33395	0.0195986	0.489903
FANCC	Colorectal Cancer	relevel(factor(race), ref = "Stage IV")Stage II/III	1.76646	0.757118	2.33313	0.0196411	0.489939
KMT2D	Soft Tissue Sarcoma	factor(sample_subtypes)Myxofibrosarcoma	1.84005	0.788697	2.33303	0.0196465	0.489939
MAPKAP1	Non-Small Cell Lung Cancer	factor(sample_all$sex)Male	1.04733	0.448888	2.33317	0.0196395	0.489939
PBRM1	Colorectal Cancer	relevel(factor(race), ref = "Stage IV")Stage II/III	1.25847	0.539657	2.33198	0.0197015	0.490719
ANKRD11	Endometrial Cancer	relevel(factor(race), ref = "Stage IV")Stage I	-0.653444	0.280226	-2.33185	0.0197088	0.490719
SPEN	Colorectal Cancer	relevel(factor(race), ref = "Stage IV")Stage II/III	1.13856	0.488419	2.33111	0.0197474	0.491293
DDR2	Melanoma	factor(sample_all$sex)Male	1.14966	0.493243	2.33081	0.0197634	0.491303
BARD1	Endometrial Cancer	factor(sample_subtypes)Uterine Serous Carcinoma/Uterine Papillary Serous Carcinoma	-3.37721	1.44925	-2.33031	0.0197896	0.49141
NKX3-1	Endometrial Cancer	factor(aya_status)1	1.89115	0.811633	2.33005	0.0198034	0.49141
IRS1	Non-Small Cell Lung Cancer	relevel(factor(race), ref = "Stage IV")Stage I	-1.37064	0.588298	-2.32985	0.0198143	0.49141
DOT1L	Melanoma	factor(sample_all$sex)Male	0.721295	0.309732	2.32877	0.0198713	0.491666
PDCD1LG2	Colorectal Cancer	relevel(factor(race), ref = "Stage IV")Stage II/III	2.7038	1.16101	2.32883	0.019868	0.491666
INSR	Head and Neck Cancer	relevel(factor(race), ref = "Stage IV")Stage I	2.26178	0.971221	2.3288	0.0198697	0.491666
PIK3CG	Colorectal Cancer	factor(sample_subtypes)Rectal Adenocarcinoma	-0.544442	0.233972	-2.32695	0.019968	0.493673
ERBB3	Hepatobiliary Cancer	factor(sample_subtypes)Intrahepatic Cholangiocarcinoma	-1.08691	0.467309	-2.3259	0.0200237	0.493893
HIST1H2BD	Colorectal Cancer	factor(sample_all$sex)Male	1.08836	0.467909	2.326	0.0200186	0.493893
ANKRD11	Colorectal Cancer	factor(sample_subtypes)Colorectal Adenocarcinoma	-0.59868	0.257369	-2.32615	0.0200105	0.493893
FGFR3	Non-Small Cell Lung Cancer	factor(sample_all$sex)Male	-0.859057	0.369539	-2.32467	0.0200894	0.493996
NOTCH1	Melanoma	factor(sample_all$sex)Male	0.647545	0.278625	2.32407	0.0201217	0.493996
BRCA2	Endometrial Cancer	factor(sample_subtypes)Uterine Serous Carcinoma/Uterine Papillary Serous Carcinoma	-1.98646	0.854278	-2.32531	0.0200552	0.493996
MED12	Colorectal Cancer	factor(sample_all$sex)Male	-0.392852	0.169035	-2.32408	0.020121	0.493996
RAC1	Colorectal Cancer	relevel(factor(race), ref = "Stage IV")others	1.94979	0.838748	2.32464	0.0200912	0.493996
MAPK3	Colorectal Cancer	relevel(factor(race), ref = "Stage IV")Stage II/III	1.77748	0.76461	2.32469	0.0200884	0.493996
SHQ1	Colorectal Cancer	relevel(factor(race), ref = "Stage IV")Stage I	1.14275	0.491894	2.32316	0.0201703	0.494807
ANKRD11	Head and Neck Cancer	relevel(factor(race), ref = "Stage IV")Stage I	2.25682	0.971602	2.32278	0.0201911	0.494931
FLCN	Bladder Cancer	factor(sample_subtypes)Upper Tract Urothelial Carcinoma	1.14846	0.495053	2.31987	0.0203478	0.497616
POLE	Non-Small Cell Lung Cancer	factor(sample_all$sex)Male	0.354873	0.152956	2.3201	0.0203355	0.497616
PNRC1	Endometrial Cancer	relevel(factor(race), ref = "Stage IV")Stage II/III	1.90332	0.820341	2.32016	0.0203321	0.497616
KDM5A	Colorectal Cancer	relevel(factor(race), ref = "Stage IV")Stage I	0.761298	0.328289	2.31899	0.0203956	0.498015
JUN	Colorectal Cancer	factor(sample_subtypes)Colorectal Adenocarcinoma	-1.67649	0.722885	-2.31917	0.0203858	0.498015
PIK3CA	Hepatobiliary Cancer	factor(sample_subtypes)Gallbladder Cancer	1.36156	0.587706	2.31673	0.0205183	0.499085
RICTOR	Colorectal Cancer	relevel(factor(race), ref = "Stage IV")Stage II/III	1.43301	0.618411	2.31724	0.0204905	0.499085
IRS2	Head and Neck Cancer	relevel(factor(race), ref = "Stage IV")others	3.15414	1.36117	2.31723	0.0204914	0.499085
SPEN	Breast Cancer	factor(aya_status)1	-2.33939	1.00931	-2.31782	0.0204594	0.499085
RAD54L	Endometrial Cancer	factor(sample_subtypes)Uterine Serous Carcinoma/Uterine Papillary Serous Carcinoma	-3.35807	1.44942	-2.31684	0.0205123	0.499085
ARID1A	Endometrial Cancer	factor(sample_subtypes)Uterine Endometrioid Carcinoma	1.55886	0.672966	2.3164	0.0205362	0.499136
ROS1	Colorectal Cancer	factor(sample_all$sex)Male	0.42866	0.185169	2.31496	0.020615	0.499647
KMT2D	Thyroid Cancer	factor(sample_subtypes)Papillary Thyroid Cancer	-3.06762	1.32535	-2.31457	0.0206363	0.499647
PALB2	Hepatobiliary Cancer	relevel(factor(race), ref = "Stage IV")others	1.90477	0.822921	2.31465	0.0206322	0.499647
KMT2C	Colorectal Cancer	factor(sample_subtypes)Rectal Adenocarcinoma	-0.415246	0.179396	-2.31469	0.0206298	0.499647
DNMT3B	Breast Cancer	factor(sample_subtypes)Breast Invasive Ductal Carcinoma	-2.49966	1.07959	-2.31538	0.0205919	0.499647
KMT2D	Colorectal Cancer	factor(sample_subtypes)Colorectal Adenocarcinoma	-0.419453	0.181367	-2.31274	0.020737	0.500936
CDK12	Melanoma	relevel(factor(race), ref = "Stage IV")Stage I	1.13555	0.490987	2.3128	0.0207338	0.500936
TMPRSS2	Melanoma	factor(sample_all$sex)Male	0.917434	0.396674	2.31282	0.0207327	0.500936
CDK8	Bladder Cancer	relevel(factor(race), ref = "Stage IV")others	1.18429	0.512185	2.31223	0.0207651	0.501232
SPEN	Ovarian Cancer	relevel(factor(race), ref = "Stage IV")Stage II/III	2.71583	1.17516	2.31104	0.0208305	0.502428
NOTCH2	Colorectal Cancer	factor(sample_subtypes)Rectal Adenocarcinoma	-0.699252	0.302662	-2.31034	0.0208693	0.502979
EGFR	Hepatobiliary Cancer	factor(sample_subtypes)Intrahepatic Cholangiocarcinoma	-2.60919	1.12965	-2.30972	0.0209035	0.503036
FLT1	Melanoma	factor(sample_all$sex)Male	0.480967	0.20822	2.30989	0.020894	0.503036
FLCN	Endometrial Cancer	relevel(factor(race), ref = "Stage IV")Stage I	-1.25103	0.541752	-2.30923	0.0209307	0.503307
RAF1	Colorectal Cancer	factor(sample_subtypes)Rectal Adenocarcinoma	-0.903396	0.391303	-2.30869	0.0209608	0.50355
ATRX	Pancreatic Cancer	factor(sample_all$sex)Male	-0.715662	0.310015	-2.30848	0.0209726	0.50355
STK11	Non-Small Cell Lung Cancer	factor(sample_subtypes)Non-Small Cell Lung Cancer	-1.33524	0.57878	-2.30699	0.0210553	0.504768
CYLD	Breast Cancer	factor(sample_subtypes)Breast Invasive Ductal Carcinoma	-2.59774	1.12601	-2.30702	0.0210536	0.504768
AXL	Melanoma	factor(sample_all$sex)Male	0.632269	0.274152	2.30627	0.0210956	0.505351
RBM10	Non-Small Cell Lung Cancer	factor(aya_status)1	-1.65216	0.717071	-2.30404	0.0212206	0.507962
IL7R	Non-Small Cell Lung Cancer	relevel(factor(race), ref = "Stage IV")Stage I	-1.35536	0.588369	-2.3036	0.0212454	0.50817
ARID1A	Endometrial Cancer	factor(sample_subtypes)Uterine Serous Carcinoma/Uterine Papillary Serous Carcinoma	-1.63556	0.71018	-2.30302	0.0212779	0.508563
KDM5A	Colorectal Cancer	relevel(factor(race), ref = "Stage IV")Stage II/III	1.24633	0.541349	2.30226	0.0213205	0.509127
PLK2	Bladder Cancer	relevel(factor(race), ref = "Stage IV")Stage I	0.924863	0.40176	2.30203	0.0213337	0.509127
BRAF	Colorectal Cancer	factor(sample_subtypes)Colorectal Adenocarcinoma	-0.402549	0.17509	-2.29909	0.0214996	0.511577
KDM6A	Melanoma	relevel(factor(race), ref = "Stage IV")Stage II/III	1.32257	0.575263	2.29907	0.0215008	0.511577
EP300	Hepatobiliary Cancer	factor(sample_subtypes)others	2.59483	1.12875	2.29886	0.021513	0.511577
CHEK1	Colorectal Cancer	relevel(factor(race), ref = "Stage IV")Stage I	1.11852	0.486609	2.29859	0.0215281	0.511577
FAT1	Head and Neck Cancer	relevel(factor(race), ref = "Stage IV")Stage I	1.36686	0.594677	2.2985	0.0215334	0.511577
BCL2L11	Non-Small Cell Lung Cancer	factor(sample_subtypes)Lung Adenocarcinoma	-1.76608	0.76809	-2.29932	0.0214868	0.511577
KDM5C	Colorectal Cancer	factor(sample_subtypes)Rectal Adenocarcinoma	-0.767528	0.33402	-2.29785	0.0215704	0.512071
DDR2	Endometrial Cancer	factor(sample_subtypes)Uterine Serous Carcinoma/Uterine Papillary Serous Carcinoma	-3.32635	1.44815	-2.29697	0.0216207	0.512559
POLD1	Endometrial Cancer	relevel(factor(race), ref = "Stage IV")others	0.75237	0.327556	2.29692	0.0216234	0.512559
ATM	Head and Neck Cancer	relevel(factor(race), ref = "Stage IV")Stage I	2.15782	0.939969	2.29563	0.021697	0.513533
IKZF1	Colorectal Cancer	factor(sample_subtypes)Colorectal Adenocarcinoma	-0.80964	0.35268	-2.29568	0.0216943	0.513533
PIK3C2G	Endometrial Cancer	factor(sample_subtypes)Uterine Serous Carcinoma/Uterine Papillary Serous Carcinoma	-3.32421	1.44826	-2.29531	0.0217154	0.513585
TP53	Pancreatic Cancer	factor(sample_subtypes)Pancreatic Neuroendocrine Tumor	-2.6832	1.16962	-2.29407	0.0217864	0.514111
TSC1	Renal Cell Carcinoma	factor(sample_all$sex)Male	-1.15628	0.504012	-2.29414	0.0217824	0.514111
RTEL1	Endometrial Cancer	relevel(factor(race), ref = "Stage IV")others	1.0786	0.47012	2.29431	0.0217729	0.514111
CREBBP	Colorectal Cancer	factor(aya_status)1	0.4544	0.198149	2.29322	0.0218352	0.514112
NKX2-1	Colorectal Cancer	relevel(factor(race), ref = "Stage IV")Stage I	1.01729	0.443569	2.29341	0.0218243	0.514112
AMER1	Non-Small Cell Lung Cancer	relevel(factor(race), ref = "Stage IV")Stage II/III	0.829382	0.361615	2.29355	0.0218162	0.514112
PTPRT	Esophagogastric Cancer	factor(sample_all$sex)Male	1.03975	0.453614	2.29214	0.0218975	0.515195
FLT1	Endometrial Cancer	factor(sample_subtypes)Uterine Serous Carcinoma/Uterine Papillary Serous Carcinoma	-3.31761	1.448	-2.29116	0.0219541	0.516143
CBL	Melanoma	relevel(factor(race), ref = "Stage IV")Stage I	0.925938	0.404218	2.29069	0.0219813	0.516398
PIK3CG	Breast Cancer	factor(sample_subtypes)Breast Invasive Lobular Carcinoma	-1.90425	0.831808	-2.28929	0.0220626	0.517537
WHSC1L1	Breast Cancer	factor(sample_subtypes)Breast Invasive Lobular Carcinoma	-3.37449	1.4739	-2.28949	0.0220506	0.517537
EGFR	Endometrial Cancer	factor(sample_subtypes)Uterine Serous Carcinoma/Uterine Papillary Serous Carcinoma	-3.31396	1.448	-2.28864	0.0221004	0.518041
DNMT1	Colorectal Cancer	factor(aya_status)1	0.567445	0.247984	2.28823	0.0221242	0.518213
PIK3CB	Non-Small Cell Lung Cancer	factor(sample_all$sex)Male	0.645273	0.28207	2.28763	0.0221589	0.518643
BRAF	Breast Cancer	factor(sample_subtypes)Breast Invasive Lobular Carcinoma	-2.89894	1.26786	-2.28649	0.0222256	0.519759
NOTCH4	Head and Neck Cancer	factor(sample_subtypes)others	1.77845	0.777886	2.28625	0.0222395	0.519759
KMT2D	Melanoma	factor(aya_status)1	-0.835384	0.365546	-2.2853	0.022295	0.520437
RAD51D	Colorectal Cancer	relevel(factor(race), ref = "Stage IV")Stage I	1.49858	0.655777	2.2852	0.0223014	0.520437
CARD11	Bladder Cancer	factor(sample_all$sex)Male	2.33239	1.02195	2.28229	0.0224721	0.524033
IDH2	Endometrial Cancer	relevel(factor(race), ref = "Stage IV")Stage II/III	1.8631	0.816733	2.28116	0.0225389	0.525204
PALB2	Breast Cancer	factor(sample_all$sex)Male	1.79588	0.787453	2.28062	0.0225711	0.525567
CALR	Colorectal Cancer	factor(aya_status)1	1.04132	0.456708	2.28006	0.0226041	0.525948
EP300	Pancreatic Cancer	relevel(factor(race), ref = "Stage IV")others	1.43642	0.630599	2.27786	0.0227349	0.527737
SYK	Endometrial Cancer	factor(sample_subtypes)Uterine Serous Carcinoma/Uterine Papillary Serous Carcinoma	-3.30005	1.44882	-2.27775	0.0227413	0.527737
ETV1	Colorectal Cancer	relevel(factor(race), ref = "Stage IV")Stage I	0.933223	0.409616	2.27829	0.0227095	0.527737
SMYD3	Colorectal Cancer	relevel(factor(race), ref = "Stage IV")others	1.57244	0.690382	2.27765	0.0227477	0.527737
CDKN2A	Head and Neck Cancer	factor(sample_subtypes)Oropharynx Squamous Cell Carcinoma	-1.09968	0.483185	-2.2759	0.0228518	0.529763
CIC	Non-Small Cell Lung Cancer	relevel(factor(race), ref = "Stage IV")Stage I	-1.33914	0.588566	-2.27526	0.0228905	0.529882
BARD1	Endometrial Cancer	relevel(factor(race), ref = "Stage IV")others	0.959048	0.421483	2.27542	0.022881	0.529882
POLE	Colorectal Cancer	factor(aya_status)1	0.474081	0.208396	2.2749	0.0229118	0.529987
GATA1	Endometrial Cancer	factor(sample_subtypes)Uterine Serous Carcinoma/Uterine Papillary Serous Carcinoma	-3.29452	1.4488	-2.27397	0.0229677	0.530117
KMT2C	Breast Cancer	factor(sample_subtypes)Breast Invasive Ductal Carcinoma	-1.30612	0.574293	-2.27431	0.0229476	0.530117
CARM1	Melanoma	factor(sample_all$sex)Male	-1.19974	0.527541	-2.2742	0.0229537	0.530117
KEAP1	Head and Neck Cancer	factor(sample_subtypes)others	2.37603	1.04579	2.27199	0.0230872	0.532488
FANCA	Endometrial Cancer	factor(sample_subtypes)Uterine Serous Carcinoma/Uterine Papillary Serous Carcinoma	-3.28807	1.44811	-2.2706	0.0231714	0.534039
MGA	Esophagogastric Cancer	factor(sample_all$sex)Male	-1.26644	0.558013	-2.26955	0.0232348	0.535111
PTCH1	Pancreatic Cancer	relevel(factor(race), ref = "Stage IV")Stage I	1.80889	0.797407	2.26846	0.0233009	0.536077
TP53BP1	Non-Small Cell Lung Cancer	factor(sample_subtypes)Lung Adenocarcinoma	-1.3985	0.616539	-2.2683	0.0233106	0.536077
PRDM1	Melanoma	factor(sample_all$sex)Male	0.682756	0.301036	2.26803	0.0233277	0.536079
CBFB	Breast Cancer	factor(aya_status)1	-1.04713	0.461788	-2.26756	0.0233558	0.536335
MSH2	Endometrial Cancer	factor(sample_subtypes)Uterine Serous Carcinoma/Uterine Papillary Serous Carcinoma	-3.2819	1.44772	-2.26695	0.0233934	0.536808
ATM	Non-Small Cell Lung Cancer	factor(sample_subtypes)Lung Squamous Cell Carcinoma	-0.927135	0.409197	-2.26574	0.0234672	0.537557
BCOR	Endometrial Cancer	factor(sample_subtypes)Uterine Serous Carcinoma/Uterine Papillary Serous Carcinoma	-3.27839	1.44738	-2.26505	0.0235098	0.537557
SMARCB1	Breast Cancer	factor(sample_all$sex)Male	2.48122	1.09572	2.26447	0.023545	0.537557
FAT1	Bladder Cancer	factor(aya_status)1	1.11242	0.491192	2.26473	0.0235294	0.537557
BMPR1A	Breast Cancer	factor(aya_status)1	1.39885	0.617467	2.26547	0.0234841	0.537557
RECQL4	Colorectal Cancer	factor(aya_status)1	0.603054	0.266158	2.26577	0.0234655	0.537557
RTEL1	Melanoma	relevel(factor(race), ref = "Stage IV")Stage I	1.26613	0.559088	2.26464	0.0235346	0.537557
FGFR3	Non-Small Cell Lung Cancer	factor(sample_subtypes)Lung Adenocarcinoma	-1.69906	0.750502	-2.2639	0.0235802	0.537848
KMT2A	Hepatobiliary Cancer	factor(sample_subtypes)Intrahepatic Cholangiocarcinoma	-1.55808	0.688341	-2.26353	0.0236029	0.537848
CDC73	Endometrial Cancer	factor(sample_subtypes)Uterine Serous Carcinoma/Uterine Papillary Serous Carcinoma	-3.27696	1.44808	-2.26297	0.0236375	0.537848
KEAP1	Head and Neck Cancer	relevel(factor(race), ref = "Stage IV")others	2.99934	1.32547	2.26285	0.023645	0.537848
GATA2	Colorectal Cancer	factor(sample_subtypes)Rectal Adenocarcinoma	-0.94789	0.418898	-2.26282	0.0236468	0.537848
SOX9	Endometrial Cancer	relevel(factor(race), ref = "Stage IV")Stage I	-0.952477	0.421015	-2.26233	0.0236768	0.537848
HIST1H3C	Bladder Cancer	factor(sample_all$sex)Male	-1.3913	0.614957	-2.26243	0.0236708	0.537848
CDKN2A	Endometrial Cancer	factor(sample_subtypes)Uterine Serous Carcinoma/Uterine Papillary Serous Carcinoma	-3.27539	1.44899	-2.26046	0.0237926	0.537866
FBXW7	Esophagogastric Cancer	factor(sample_all$sex)Male	1.42358	0.629888	2.26006	0.0238176	0.537866
IDH2	Melanoma	relevel(factor(race), ref = "Stage IV")Stage II/III	1.89102	0.837277	2.25854	0.0239123	0.537866
JAK2	Colorectal Cancer	relevel(factor(race), ref = "Stage IV")Stage I	1.0037	0.444323	2.25894	0.0238873	0.537866
APC	Hepatobiliary Cancer	factor(sample_subtypes)Intrahepatic Cholangiocarcinoma	-1.55055	0.686003	-2.26027	0.0238042	0.537866
MAP2K1	Endometrial Cancer	factor(sample_subtypes)Uterine Serous Carcinoma/Uterine Papillary Serous Carcinoma	-3.27221	1.44886	-2.25848	0.0239158	0.537866
NF1	Gastrointestinal Stromal Tumor	factor(sample_all$sex)Male	-1.22706	0.542551	-2.26165	0.023719	0.537866
MDM2	Colorectal Cancer	relevel(factor(race), ref = "Stage IV")Stage I	1.44304	0.638712	2.2593	0.0238645	0.537866
XPO1	Endometrial Cancer	factor(sample_subtypes)Uterine Serous Carcinoma/Uterine Papillary Serous Carcinoma	-3.27454	1.44792	-2.26155	0.0237255	0.537866
FAT1	Melanoma	factor(aya_status)1	-0.981266	0.434405	-2.25887	0.0238914	0.537866
FUBP1	Colorectal Cancer	relevel(factor(race), ref = "Stage IV")Stage I	1.10108	0.487361	2.25926	0.0238672	0.537866
ZFHX3	Pancreatic Cancer	relevel(factor(race), ref = "Stage IV")Stage I	1.24413	0.550374	2.26052	0.0237891	0.537866
BBC3	Colorectal Cancer	factor(sample_all$sex)Male	-1.09931	0.486237	-2.26086	0.0237678	0.537866
DNMT1	Esophagogastric Cancer	relevel(factor(race), ref = "Stage IV")Stage I	1.9238	0.8508	2.26116	0.0237493	0.537866
PDGFRB	Melanoma	factor(sample_subtypes)Melanoma of Unknown Primary	2.34483	1.03865	2.25757	0.0239724	0.538757
INPP4A	Melanoma	factor(sample_all$sex)Male	0.95771	0.424401	2.25662	0.0240321	0.53895
MYOD1	Non-Small Cell Lung Cancer	factor(sample_all$sex)Male	0.568159	0.251729	2.25703	0.0240061	0.53895
SETD8	Colorectal Cancer	relevel(factor(race), ref = "Stage IV")Stage I	1.4774	0.654687	2.25666	0.0240295	0.53895
TP63	Melanoma	factor(sample_all$sex)Male	0.407289	0.180534	2.25602	0.0240691	0.539398
CDH1	Esophagogastric Cancer	factor(sample_subtypes)others	2.05352	0.910875	2.25445	0.0241681	0.539819
FAM46C	Colorectal Cancer	relevel(factor(race), ref = "Stage IV")Stage I	1.4328	0.635473	2.2547	0.0241519	0.539819
GLI1	Non-Small Cell Lung Cancer	factor(sample_subtypes)Lung Adenocarcinoma	-0.984757	0.436721	-2.25489	0.0241405	0.539819
RECQL4	Non-Small Cell Lung Cancer	relevel(factor(race), ref = "Stage IV")Stage I	-2.27089	1.00745	-2.25409	0.0241904	0.539819
PLCG2	Ovarian Cancer	factor(sample_subtypes)High-Grade Serous Ovarian Cancer	-1.84343	0.81753	-2.25488	0.0241407	0.539819
PLCG2	Endometrial Cancer	factor(sample_subtypes)Uterine Serous Carcinoma/Uterine Papillary Serous Carcinoma	-3.26468	1.44823	-2.25425	0.0241804	0.539819
PMS2	Colorectal Cancer	factor(sample_subtypes)Rectal Adenocarcinoma	-1.11641	0.495384	-2.25362	0.0242201	0.540101
DNMT1	Bladder Cancer	factor(sample_subtypes)Upper Tract Urothelial Carcinoma	0.844361	0.374715	2.25334	0.0242377	0.540113
CIC	Ovarian Cancer	factor(aya_status)1	2.21717	0.984094	2.253	0.024259	0.540134
FOXL2	Breast Cancer	factor(sample_subtypes)Breast Invasive Lobular Carcinoma	-2.85688	1.26816	-2.25278	0.0242728	0.540134
STK11	Hepatobiliary Cancer	factor(sample_subtypes)Hepatocellular Carcinoma	-2.42623	1.07745	-2.25184	0.0243326	0.541029
PDGFRB	Endometrial Cancer	factor(sample_subtypes)Uterine Serous Carcinoma/Uterine Papillary Serous Carcinoma	-3.26182	1.44866	-2.2516	0.0243473	0.541029
BCL6	Breast Cancer	factor(sample_all$sex)Male	2.46372	1.09466	2.25066	0.0244071	0.541977
FBXW7	Non-Small Cell Lung Cancer	factor(sample_all$sex)Male	0.455607	0.202551	2.24934	0.0244908	0.542879
MLH1	Colorectal Cancer	factor(sample_all$sex)Male	0.541969	0.241031	2.24855	0.0245414	0.542879
MDM2	Breast Cancer	factor(sample_subtypes)Breast Invasive Lobular Carcinoma	-3.25433	1.4479	-2.24763	0.0246	0.542879
KEAP1	Non-Small Cell Lung Cancer	factor(sample_subtypes)others	-2.35048	1.04478	-2.24973	0.024466	0.542879
KDM5A	Non-Small Cell Lung Cancer	relevel(factor(race), ref = "Stage IV")Stage I	-1.61262	0.71749	-2.24759	0.0246022	0.542879
IKBKE	Breast Cancer	factor(sample_all$sex)Male	2.46637	1.09725	2.24777	0.0245909	0.542879
IRS2	Endometrial Cancer	factor(sample_subtypes)Uterine Carcinosarcoma/Uterine Malignant Mixed Mullerian Tumor	-2.0182	0.897521	-2.24864	0.0245354	0.542879
AXIN2	Endometrial Cancer	factor(sample_subtypes)Uterine Serous Carcinoma/Uterine Papillary Serous Carcinoma	-3.2539	1.44761	-2.24778	0.0245904	0.542879
TGFBR1	Endometrial Cancer	factor(sample_subtypes)Uterine Serous Carcinoma/Uterine Papillary Serous Carcinoma	-3.25593	1.44796	-2.24863	0.0245362	0.542879
CREBBP	Esophagogastric Cancer	relevel(factor(race), ref = "Stage IV")Stage I	1.48405	0.660544	2.24671	0.0246585	0.543743
PPP2R1A	Esophagogastric Cancer	relevel(factor(race), ref = "Stage IV")Stage I	1.85888	0.827496	2.24639	0.0246792	0.543819
TP53	Endometrial Cancer	relevel(factor(race), ref = "Stage IV")Stage I	-0.450232	0.200479	-2.24578	0.024718	0.543917
RRAS	Endometrial Cancer	factor(sample_subtypes)Uterine Endometrioid Carcinoma	-2.80902	1.25074	-2.24588	0.0247117	0.543917
FGF4	Bladder Cancer	relevel(factor(race), ref = "Stage IV")others	1.91126	0.851639	2.24421	0.024819	0.545759
ARID1A	Endometrial Cancer	factor(sample_subtypes)Uterine Carcinosarcoma/Uterine Malignant Mixed Mullerian Tumor	-1.63819	0.730286	-2.24322	0.0248827	0.546399
AURKA	Endometrial Cancer	factor(sample_subtypes)Uterine Serous Carcinoma/Uterine Papillary Serous Carcinoma	-3.25002	1.44869	-2.24343	0.0248694	0.546399
FOXP1	Ovarian Cancer	factor(sample_subtypes)High-Grade Serous Ovarian Cancer	-1.96258	0.875065	-2.24278	0.0249111	0.546644
SETD2	Colorectal Cancer	factor(aya_status)1	0.510231	0.227552	2.24226	0.0249445	0.546998
MAP3K1	Head and Neck Cancer	relevel(factor(race), ref = "Stage IV")Stage I	2.29223	1.02272	2.24131	0.0250063	0.547972
STAT3	Head and Neck Cancer	relevel(factor(race), ref = "Stage IV")Stage I	2.14321	0.956592	2.24047	0.0250607	0.548785
INPP4B	Non-Small Cell Lung Cancer	factor(sample_subtypes)Lung Squamous Cell Carcinoma	-1.15144	0.514044	-2.23997	0.0250928	0.549106
RB1	Bladder Cancer	relevel(factor(race), ref = "Stage IV")Stage I	-0.545908	0.243743	-2.23968	0.0251114	0.549135
ARID1A	Ovarian Cancer	factor(sample_subtypes)others	-2.55266	1.1406	-2.23801	0.0252207	0.549624
BRD4	Colorectal Cancer	factor(aya_status)1	0.565398	0.252575	2.23853	0.0251864	0.549624
CD274	Endometrial Cancer	factor(sample_subtypes)Uterine Endometrioid Carcinoma	-2.6731	1.19429	-2.23823	0.025206	0.549624
RAD51D	Endometrial Cancer	factor(sample_subtypes)Uterine Endometrioid Carcinoma	-2.6731	1.19429	-2.23823	0.025206	0.549624
MAX	Gastrointestinal Stromal Tumor	relevel(factor(race), ref = "Stage IV")Stage I	-2.3233	1.03805	-2.23815	0.0252113	0.549624
PDCD1	Endometrial Cancer	factor(sample_subtypes)Uterine Serous Carcinoma/Uterine Papillary Serous Carcinoma	-3.2394	1.44787	-2.23736	0.0252631	0.550169
CREBBP	Bladder Cancer	factor(sample_subtypes)Upper Tract Urothelial Carcinoma	0.43092	0.192638	2.23694	0.0252904	0.550384
EPCAM	Non-Small Cell Lung Cancer	factor(sample_subtypes)Lung Adenocarcinoma	-1.70324	0.76165	-2.23626	0.025335	0.550975
POLD1	Head and Neck Cancer	relevel(factor(race), ref = "Stage IV")others	3.06179	1.36935	2.23595	0.0253552	0.551035
YES1	Colorectal Cancer	factor(aya_status)1	0.974977	0.436118	2.23558	0.0253793	0.55118
SUFU	Colorectal Cancer	factor(aya_status)1	0.863919	0.386504	2.23521	0.0254034	0.551324
NOTCH3	Endometrial Cancer	relevel(factor(race), ref = "Stage IV")Stage II/III	1.21566	0.544098	2.23426	0.0254659	0.552302
KIT	Melanoma	factor(sample_subtypes)Head and Neck Mucosal Melanoma	-1.31586	0.589333	-2.23279	0.0255628	0.552698
FLT3	Ovarian Cancer	factor(sample_subtypes)others	3.54096	1.58572	2.23304	0.0255466	0.552698
NKX2-1	Pancreatic Cancer	relevel(factor(race), ref = "Stage IV")Stage I	1.83863	0.823182	2.23356	0.025512	0.552698
RICTOR	Ovarian Cancer	factor(sample_subtypes)others	3.54096	1.58572	2.23304	0.0255466	0.552698
GLI1	Ovarian Cancer	relevel(factor(race), ref = "Stage IV")others	1.84136	0.824741	2.23266	0.0255715	0.552698
TAP2	Melanoma	relevel(factor(race), ref = "Stage IV")Stage I	1.5862	0.710548	2.23236	0.0255913	0.552747
APC	Head and Neck Cancer	relevel(factor(race), ref = "Stage IV")Stage I	2.1311	0.954937	2.23167	0.0256368	0.553353
SOX9	Bladder Cancer	factor(aya_status)1	1.76986	0.793473	2.23053	0.0257124	0.554605
MYCN	Colorectal Cancer	factor(sample_subtypes)Rectal Adenocarcinoma	-0.989984	0.444267	-2.22835	0.0258569	0.555164
AURKB	Colorectal Cancer	factor(aya_status)1	1.06207	0.476571	2.22856	0.0258432	0.555164
CTCF	Hepatobiliary Cancer	factor(aya_status)1	2.0522	0.920521	2.22939	0.0257882	0.555164
CUL3	Colorectal Cancer	factor(sample_all$sex)Male	0.919767	0.412649	2.22893	0.0258184	0.555164
INHBA	Endometrial Cancer	factor(sample_subtypes)Uterine Serous Carcinoma/Uterine Papillary Serous Carcinoma	-3.22824	1.44871	-2.22836	0.0258562	0.555164
SESN3	Esophagogastric Cancer	relevel(factor(race), ref = "Stage IV")others	1.95943	0.878858	2.22952	0.0257791	0.555164
TAP2	Colorectal Cancer	factor(aya_status)1	0.80677	0.362058	2.22829	0.0258612	0.555164
MAP3K1	Colorectal Cancer	factor(aya_status)1	0.566105	0.254267	2.22642	0.0259862	0.557468
NTRK3	Colorectal Cancer	relevel(factor(race), ref = "Stage IV")Stage I	0.804041	0.361226	2.22587	0.0260229	0.557879
IDH2	Colorectal Cancer	factor(sample_subtypes)Rectal Adenocarcinoma	-1.39192	0.625425	-2.22556	0.0260434	0.557939
SOX17	Endometrial Cancer	relevel(factor(race), ref = "Stage IV")Stage I	-0.800231	0.359645	-2.22506	0.0260772	0.558286
DNAJB1	Non-Small Cell Lung Cancer	factor(sample_subtypes)Lung Squamous Cell Carcinoma	-1.85824	0.835353	-2.2245	0.0261146	0.558708
ARID1B	Bladder Cancer	factor(sample_subtypes)Upper Tract Urothelial Carcinoma	0.572907	0.257677	2.22335	0.0261921	0.559987
ATM	Non-Small Cell Lung Cancer	relevel(factor(race), ref = "Stage IV")Stage I	-0.448921	0.202036	-2.22199	0.0262839	0.560352
NF1	Breast Cancer	factor(aya_status)1	-0.941822	0.423874	-2.22194	0.0262874	0.560352
MSH6	Colorectal Cancer	relevel(factor(race), ref = "Stage IV")Stage II/III	1.20577	0.542765	2.22152	0.0263155	0.560352
REL	Colorectal Cancer	factor(aya_status)1	0.901323	0.405604	2.22217	0.0262716	0.560352
SMARCA4	Esophagogastric Cancer	factor(sample_subtypes)Esophageal Adenocarcinoma	1.02178	0.459927	2.22161	0.0263099	0.560352
FOXP1	Bladder Cancer	factor(aya_status)1	1.44688	0.651158	2.22202	0.0262822	0.560352
AKT3	Colorectal Cancer	factor(sample_subtypes)Rectal Adenocarcinoma	-1.04016	0.468421	-2.22057	0.0263803	0.561353
NSD1	Breast Cancer	relevel(factor(race), ref = "Stage IV")Stage I	-1.60877	0.724682	-2.21997	0.0264211	0.561844
WT1	Colorectal Cancer	relevel(factor(race), ref = "Stage IV")Stage I	0.981652	0.442307	2.21939	0.02646	0.561901
IL7R	Melanoma	factor(aya_status)1	-1.33294	0.600568	-2.21946	0.0264557	0.561901
ICOSLG	Endometrial Cancer	relevel(factor(race), ref = "Stage IV")Stage II/III	1.80893	0.815147	2.21914	0.0264771	0.561901
CBL	Non-Small Cell Lung Cancer	factor(sample_subtypes)Lung Adenocarcinoma	-1.17728	0.530938	-2.21736	0.0265984	0.562586
STAG2	Non-Small Cell Lung Cancer	relevel(factor(race), ref = "Stage IV")Stage I	-0.934722	0.421473	-2.21775	0.0265719	0.562586
CREBBP	Thyroid Cancer	factor(sample_subtypes)Papillary Thyroid Cancer	-2.92555	1.32015	-2.21607	0.026687	0.562586
IKZF1	Colorectal Cancer	factor(sample_subtypes)others	1.77564	0.801261	2.21605	0.0266878	0.562586
TSC2	Colorectal Cancer	relevel(factor(race), ref = "Stage IV")Stage II/III	1.195	0.538971	2.21718	0.0266108	0.562586
RNF43	Hepatobiliary Cancer	factor(sample_subtypes)Hepatocellular Carcinoma	-2.47192	1.1144	-2.21816	0.0265439	0.562586
EPHA5	Ovarian Cancer	relevel(factor(race), ref = "Stage IV")others	1.82006	0.821364	2.21589	0.0266988	0.562586
DOT1L	Colorectal Cancer	relevel(factor(race), ref = "Stage IV")Stage I	0.725951	0.327625	2.2158	0.0267051	0.562586
TMEM127	Endometrial Cancer	relevel(factor(race), ref = "Stage IV")Stage I	2.0725	0.934923	2.21676	0.0266396	0.562586
HLA-B	Colorectal Cancer	factor(sample_subtypes)Rectal Adenocarcinoma	-0.728061	0.328437	-2.21674	0.0266407	0.562586
INPP4A	Endometrial Cancer	factor(sample_subtypes)Uterine Serous Carcinoma/Uterine Papillary Serous Carcinoma	-3.2094	1.44743	-2.21731	0.026602	0.562586
NF1	Colorectal Cancer	relevel(factor(race), ref = "Stage IV")Stage II/III	1.08718	0.49074	2.21538	0.026734	0.562749
ARID1A	Non-Small Cell Lung Cancer	factor(sample_all$sex)Male	0.250215	0.112955	2.21517	0.0267484	0.562749
KDM6A	Breast Cancer	relevel(factor(race), ref = "Stage IV")Stage I	0.752321	0.339776	2.21417	0.0268174	0.56345
TRAF7	Bladder Cancer	relevel(factor(race), ref = "Stage IV")Stage I	0.989946	0.447093	2.21418	0.0268162	0.56345
PDCD1	Colorectal Cancer	relevel(factor(race), ref = "Stage IV")Stage I	0.906578	0.409618	2.21323	0.0268819	0.564432
APC	Bladder Cancer	factor(sample_subtypes)Upper Tract Urothelial Carcinoma	-0.95882	0.433348	-2.21259	0.0269261	0.564983
ICOSLG	Bladder Cancer	factor(sample_subtypes)Upper Tract Urothelial Carcinoma	1.32618	0.599538	2.21201	0.026966	0.565446
IL7R	Non-Small Cell Lung Cancer	factor(sample_subtypes)Lung Adenocarcinoma	-1.05111	0.475258	-2.21166	0.02699	0.565575
PMAIP1	Non-Small Cell Lung Cancer	factor(sample_subtypes)Lung Adenocarcinoma	-2.43379	1.1007	-2.21113	0.0270266	0.565967
RTEL1	Non-Small Cell Lung Cancer	factor(sample_all$sex)Male	0.713223	0.322603	2.21084	0.0270468	0.566014
ASXL1	Colorectal Cancer	factor(sample_subtypes)Colorectal Adenocarcinoma	-0.656372	0.29698	-2.21016	0.0270942	0.566474
ARID1A	Endometrial Cancer	relevel(factor(race), ref = "Stage IV")Stage I	-0.341158	0.15437	-2.21001	0.0271046	0.566474
NRAS	Endometrial Cancer	relevel(factor(race), ref = "Stage IV")Stage I	0.777142	0.351803	2.20902	0.0271731	0.567155
MET	Melanoma	factor(sample_subtypes)Cutaneous Melanoma	2.24201	1.01489	2.20912	0.0271665	0.567155
FGFR4	Endometrial Cancer	factor(sample_subtypes)Uterine Endometrioid Carcinoma	-1.80196	0.816029	-2.2082	0.0272301	0.567703
EP300	Hepatobiliary Cancer	relevel(factor(race), ref = "Stage IV")others	1.81491	0.822016	2.20788	0.0272525	0.567703
PTCH1	Colorectal Cancer	relevel(factor(race), ref = "Stage IV")Stage II/III	1.1938	0.540703	2.20787	0.0272532	0.567703
HRAS	Endometrial Cancer	factor(sample_subtypes)Uterine Serous Carcinoma/Uterine Papillary Serous Carcinoma	-3.19556	1.44828	-2.20645	0.0273525	0.568275
TP53	Melanoma	factor(sample_all$sex)Male	0.351356	0.159236	2.20652	0.027348	0.568275
ARID1B	Non-Small Cell Lung Cancer	factor(sample_subtypes)Lung Adenocarcinoma	-0.958441	0.434372	-2.2065	0.0273491	0.568275
FGF19	Endometrial Cancer	factor(sample_subtypes)Uterine Endometrioid Carcinoma	-2.5989	1.17782	-2.20653	0.0273467	0.568275
PREX2	Melanoma	factor(sample_subtypes)others	2.04119	0.925496	2.20551	0.027418	0.569262
PBRM1	Colorectal Cancer	factor(sample_subtypes)Rectal Adenocarcinoma	-0.573615	0.260159	-2.20486	0.0274638	0.569837
GATA3	Breast Cancer	factor(sample_all$sex)Male	0.814535	0.369624	2.20369	0.0275464	0.570855
MAP2K4	Colorectal Cancer	relevel(factor(race), ref = "Stage IV")others	0.994812	0.451481	2.20344	0.0275638	0.570855
JAK1	Colorectal Cancer	relevel(factor(race), ref = "Stage IV")Stage II/III	1.35914	0.616894	2.2032	0.0275804	0.570855
RBM10	Bladder Cancer	relevel(factor(race), ref = "Stage IV")Stage I	0.517906	0.235077	2.20314	0.0275851	0.570855
TSC1	Esophagogastric Cancer	relevel(factor(race), ref = "Stage IV")Stage II/III	1.79244	0.813891	2.20231	0.0276437	0.571695
NCOR1	Bladder Cancer	relevel(factor(race), ref = "Stage IV")Stage II/III	1.26188	0.573715	2.19949	0.0278434	0.575448
GRIN2A	Hepatobiliary Cancer	relevel(factor(race), ref = "Stage IV")Stage I	1.27351	0.579227	2.19864	0.0279032	0.576308
RAD50	Non-Small Cell Lung Cancer	factor(sample_subtypes)Lung Squamous Cell Carcinoma	-1.81429	0.825339	-2.19823	0.0279324	0.576534
ERBB3	Endometrial Cancer	factor(sample_subtypes)Uterine Serous Carcinoma/Uterine Papillary Serous Carcinoma	-1.85971	0.846196	-2.19774	0.0279679	0.576891
ERRFI1	Colorectal Cancer	factor(sample_all$sex)Male	0.960949	0.437403	2.19694	0.0280247	0.577684
TERT	Non-Small Cell Lung Cancer	factor(sample_subtypes)Lung Adenocarcinoma	-1.0418	0.474376	-2.19614	0.028082	0.578489
SMARCB1	Non-Small Cell Lung Cancer	factor(sample_all$sex)Male	0.728249	0.331663	2.19575	0.0281098	0.578684
CD79A	Colorectal Cancer	factor(sample_all$sex)Male	-0.726644	0.331046	-2.195	0.0281639	0.579421
FBXW7	Head and Neck Cancer	relevel(factor(race), ref = "Stage IV")Stage II/III	2.00405	0.913145	2.19467	0.0281873	0.579525
PDGFRB	Melanoma	factor(sample_all$sex)Male	0.615736	0.280709	2.1935	0.0282713	0.580875
SLX4	Endometrial Cancer	relevel(factor(race), ref = "Stage IV")Stage I	-0.803243	0.366236	-2.19324	0.0282904	0.58089
MET	Melanoma	factor(sample_subtypes)Melanoma of Unknown Primary	2.27498	1.03746	2.19282	0.02832	0.581121
BRAF	Colorectal Cancer	factor(sample_all$sex)Male	-0.237571	0.108385	-2.19193	0.0283849	0.581698
GLI1	Colorectal Cancer	factor(sample_subtypes)Colorectal Adenocarcinoma	-0.711866	0.324739	-2.19212	0.0283709	0.581698
PHOX2B	Non-Small Cell Lung Cancer	relevel(factor(race), ref = "Stage IV")Stage II/III	1.37579	0.627828	2.19135	0.0284264	0.582171
[truncated: 30,077 more rows]
